# Supplementary material for: A local-to-global emissions inventory of macroplastic pollution
Source: Research Square preprint supplement (doi:10.21203/rs.3.rs-3376960/v1), 2023-10-23
Supplement: Supplementary file 1 [file 0e02402f0afb181d513d07ab.pdf]

1 **Supplementary information for**

2 **A local-to-global emissions inventory of macroplastic pollution**

3  
4 **This PDF file includes:**

5 Materials and Methods

6 Fig. S1 to Fig. S29

7 Table S1 to Table S37

8  
9 **Other Supplementary information for this manuscript include the following:**

10 Supplementary Table 1: Data cleaning

11 Supplementary Table 2: System of equations

12 Supplementary Table 3: Material flow analysis outputs - aggregated national

13 Supplementary Table 4: Material flow analysis outputs - aggregated global, regional, and income  
14 category

## 17 Table of Contents

|    |            |                                                                                        |           |
|----|------------|----------------------------------------------------------------------------------------|-----------|
| 18 | <b>S.1</b> | <b><i>Methodology summary</i></b>                                                      | <b>4</b>  |
| 19 | <b>S.2</b> | <b><i>Scope</i></b>                                                                    | <b>7</b>  |
| 20 | <b>S.3</b> | <b><i>Solid waste management data</i></b>                                              | <b>8</b>  |
| 21 | <b>S.4</b> | <b><i>System maps</i></b>                                                              | <b>9</b>  |
| 22 | S.4.1      | Tributary MFA                                                                          | 9         |
| 23 | S.4.2      | Full MSW MFA                                                                           | 10        |
| 24 | S.4.3      | Plastics MFA                                                                           | 12        |
| 25 | <b>S.5</b> | <b><i>Data inputs</i></b>                                                              | <b>16</b> |
| 26 | <b>S.6</b> | <b><i>Primary data collection, harmonisation, correction, and cleaning</i></b>         | <b>20</b> |
| 27 | S.6.1      | Global municipal-level solid waste management <i>primary input data</i> sources (MS1a) | 20        |
| 28 | S.6.2      | National municipal-level solid waste management data sources (MS1b)                    | 21        |
| 29 | S.6.3      | Assignment of administrative areas (MS2)                                               | 22        |
| 30 | S.6.4      | Data harmonisation (MS3a), correction (MS3b) and quality screening (MS3c)              | 24        |
| 31 | S.6.4.1    | Waste Wise Cities Tool (WaCT)                                                          | 24        |
| 32 | S.6.4.2    | Wasteaware Benchmark Cities Indicators (WABI)                                          | 25        |
| 33 | S.6.4.3    | What a Waste 2.0 (WaW2.0)                                                              | 28        |
| 34 | S.6.4.4    | UNSD City Waste Data                                                                   | 37        |
| 35 | S.6.4.5    | SIPSN Data                                                                             | 44        |
| 36 | S.6.4.6    | MoHURD Data                                                                            | 45        |
| 37 | S.6.5      | Data consolidation and deduplication                                                   | 46        |
| 38 | S.6.6      | Default GADM Level selection                                                           | 47        |
| 39 | S.6.7      | Data cleaning via outlier identification                                               | 51        |
| 40 | <b>S.7</b> | <b><i>Machine learning for prediction of primary data input variables</i></b>          | <b>56</b> |
| 41 | S.7.1      | Independent variables (MS4a)                                                           | 56        |
| 42 | S.7.2      | Imputation of independent variables (MS4b)                                             | 58        |
| 43 | S.7.3      | Quantile regression random forest (MS5a and MS5b)                                      | 58        |
| 44 | <b>S.8</b> | <b><i>Secondary data collection and processing (MS6)</i></b>                           | <b>62</b> |
| 45 | S.8.1      | Proportion of plastic that is rigid (C0a)                                              | 63        |
| 46 | S.8.2      | Informal sector recycling (P14)                                                        | 64        |
| 47 | S.8.2.1    | Informal recycling sector population                                                   | 64        |
| 48 | S.8.2.2    | Informal recycling sector productivity                                                 | 68        |
| 49 | S.8.2.3    | Proportion of plastic collected by informal recycling sector (C15)                     | 68        |

|    |                   |                                                                                                    |            |
|----|-------------------|----------------------------------------------------------------------------------------------------|------------|
| 50 | S.8.2.4           | Proportion of plastic collected by informal recycling sector that is rigid (C21a)                  | 70         |
| 51 | <b>S.8.3</b>      | <b>Rejects of rigid and flexible plastic from sorting and reprocessing by formal (C24aa C24ab)</b> |            |
| 52 |                   | <b>and informal (C23aa, C23ab) sectors</b>                                                         | <b>70</b>  |
| 53 | S.8.3.1           | Step 1: Establish baseline plastic waste collected for recycling                                   | 71         |
| 54 | S.8.3.2           | Step 2 and 3: Identify empirical or assumptive data on rejects or use abductive reasoning to       |            |
| 55 | estimate          | 73                                                                                                 |            |
| 56 | S.8.3.3           | Step 3: Apply evidenced or assumed reject rates to the mass of plastic collected for recycling     | 77         |
| 57 | S.8.3.4           | Mismanagement of rejects from sorting and reprocessing (C25aa, C25ab, C26aa, C26ab)                | 79         |
| 58 | <b>S.8.4</b>      | <b>Proportion of plastic in formal sector collection for recycling</b>                             | <b>80</b>  |
| 59 | <b>S.8.5</b>      | <b>Uncollected litter (C1)</b>                                                                     | <b>80</b>  |
| 60 | S.8.5.1           | Littering rate                                                                                     | 81         |
| 61 | S.8.5.2           | Total litter (L <sub>T</sub> )                                                                     | 82         |
| 62 | S.8.5.3           | Uncollected litter (C1)                                                                            | 84         |
| 63 | <b>S.8.6</b>      | <b>Proportion of plastic and rigid plastic in uncollected litter (C11 and C11a)</b>                | <b>85</b>  |
| 64 | <b>S.8.7</b>      | <b>Uncollected MSW (C2)</b>                                                                        | <b>85</b>  |
| 65 | <b>S.8.8</b>      | <b>Debris emissions from collection system (C3)</b>                                                | <b>85</b>  |
| 66 | <b>S.8.9</b>      | <b>Debris emissions from uncontrolled disposal of MSW (C9)</b>                                     | <b>86</b>  |
| 67 | <b>S.8.10</b>     | <b>Plastic (C14) and rigid plastic (C14a) in disposal debris emissions</b>                         | <b>88</b>  |
| 68 | <b>S.8.11</b>     | <b>Open burning</b>                                                                                | <b>89</b>  |
| 69 | S.8.11.1          | Open burning of uncollected waste (C10)                                                            | 89         |
| 70 | S.8.11.2          | Open burning of rejects from sorting and reprocessing (C27aa, C27ab, C28aa, C28 ab)                | 92         |
| 71 | S.8.11.3          | Open burning at uncontrolled disposal sites (C8)                                                   | 92         |
| 72 | <b>S.9</b>        | <b>Probabilistic material flow analysis (MS7)</b>                                                  | <b>93</b>  |
| 73 | <b>S.9.1</b>      | <b>Data inputs</b>                                                                                 | <b>94</b>  |
| 74 | S.9.1.1           | Random sampling of primary input data                                                              | 94         |
| 75 | S.9.1.2           | Correction of primary input variable predictions by settlement typology                            | 96         |
| 76 | S.9.1.3           | Sampling of <i>secondary data inputs</i>                                                           | 100        |
| 77 | <b>S.9.2</b>      | <b>Material flow analysis</b>                                                                      | <b>100</b> |
| 78 | S.9.2.1           | Spatial aggregation                                                                                | 101        |
| 79 | <b>S.10</b>       | <b>Sensitivity analysis</b>                                                                        | <b>102</b> |
| 80 | <b>S.11</b>       | <b>Conversion of emission mass to item count</b>                                                   | <b>105</b> |
| 81 | <b>References</b> |                                                                                                    | <b>106</b> |
| 82 |                   |                                                                                                    |            |
| 83 |                   |                                                                                                    |            |

## S.1 Methodology summary

We present the first of two stages in the ‘Spatio-temporal quantification of plastic pollution origins and transportation’ model (SPOT). This first stage begins when waste is generated (created), meaning the part of the system where products and materials are ‘discarded’ by their users, and ends when those materials are: recycled; recovered; stored in disposal facilities; or ‘emitted’. We use ‘emission’ to describe the flow of plastic from a state of ‘containment’ (control) to one where it is ‘uncontained’ (**Extended data Fig. 1**). By uncontained we mean that plastic is in the ‘environment’, both built and natural, and is no longer subject to any form of management; it is unintentionally present. We call the point between the contained and uncontained states, the ‘*emission boundary*’ (**Fig. S1**). For clarification, we do not consider land disposal facilities (landfills or dumpsites), to be in the environment because despite the very poor level of control in some cases (dumpsites), they are nonetheless contained, they are intended to be there. We also consider solid waste which is in sewerage (wastewater) to be uncontained because despite its presence in a contained structure, it is unintentionally present, meaning that the sewers were not designed to carry it.

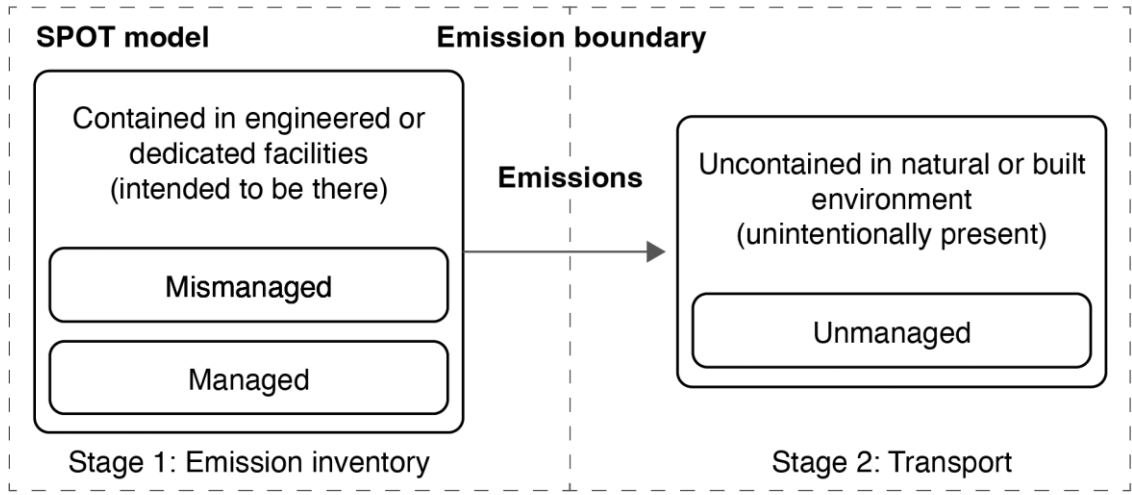

**Fig. S1.** The boundary between the present ‘upstream’ part and the next ‘downstream’ part of the ‘Spatio-temporal quantification of plastic pollution origins and transportation’ model (SPOT).

Emissions of plastic fall into two categories: 1) open burning (combustion in open, uncontrolled fires); and 2) debris (physical material items, objects, and particles). Emissions through open burning (calculated as the mass partially or completely combusted) are considered a system endpoint. Emissions of debris are at risk of further transport through the terrestrial environment (unmanaged system) via the action of wind or surface water, movement which is described in the second stage of the SPOT model, and which will not be discussed further here.

Our objectives were achieved following a seven-step workflow illustrated in **Fig. S2** according to a series of methodological steps (MS).

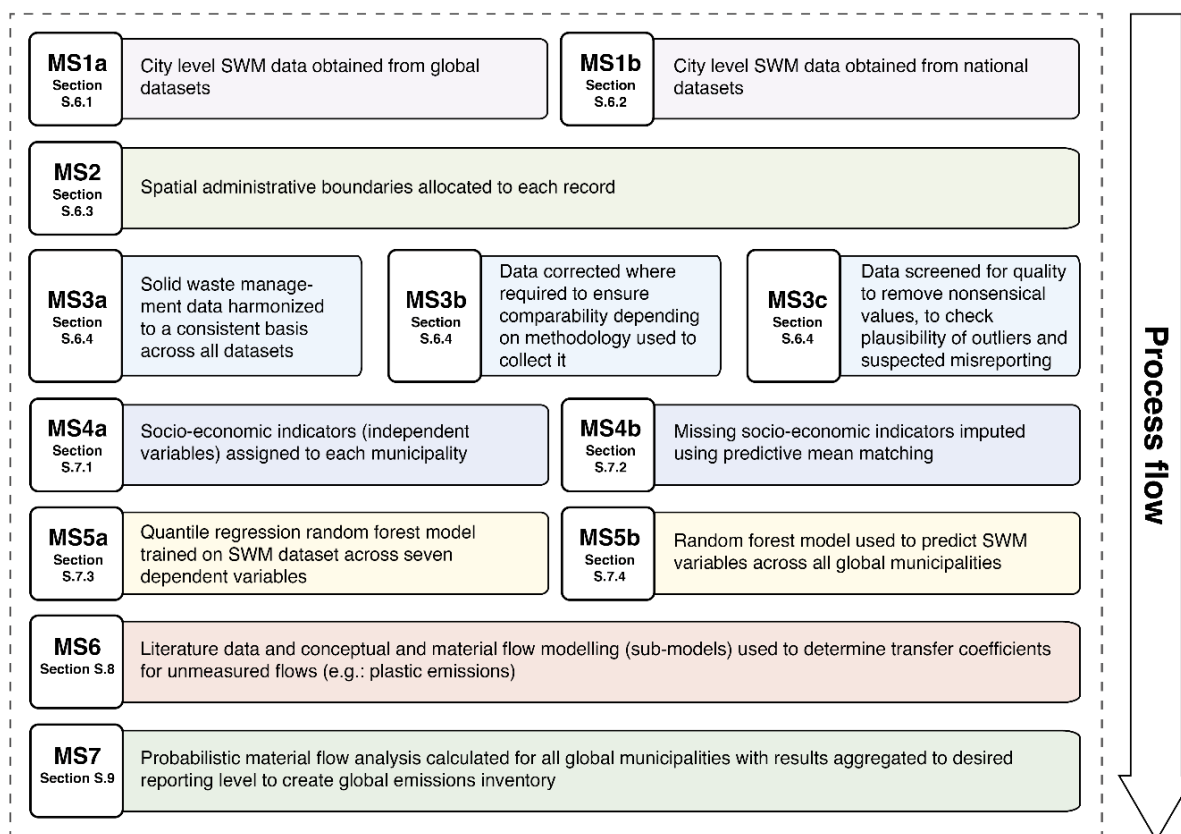

**Fig. S2.** Overview of steps in methodological process. Abbreviations: Solid waste management (SWM); methodological step (MS).

Municipal level solid waste management data were obtained from both global (MS1a, Section S.6.1) and national datasets (MS1b, Section S.6.2). Each record in these datasets was assigned a spatial administrative area according to the area that the data is believed to represent (MS2, Section S.6.3). Data, termed here *primary input data*, for seven solid waste management variables, termed here *primary input variables*, (Section S.5), were extracted from each record and harmonised to the most consistent basis possible (MS3a, Section S.6.4).

*Primary input data* were screened and corrected depending on the methodology used to obtain them. This ensured comparability between and within datasets (MS3b, Section S.6.4). For example, if the waste generation rate was considered to represent only collected waste, the value was corrected to obtain the overall waste generation rate (including uncollected MSW) by dividing it by the collection coverage. Following these necessary corrections, data in each record were screened to remove values that were obviously incorrect, for instance, due to user error during data input (MS3c, Section S.6.4). Variables, defined in Section S.5, such as formal dry recycling, incineration, and other recovery were also manually checked for plausibility based on a review of literature. For example, many cities report a ‘recycling rate’, but it is often unclear if material is collected by the formal authorities or by informal recycling sector participants. The plausibility review attempted to improve reliability by determining what each data point is likely to represent, and therefore provide a justification for either accepting or rejecting it as formal dry recycling. Further cleaning of the dataset was performed by manually assessing the plausibility

of outlier data points to remove those which were believed to be a result of error rather than measured variation (Section S.6.4).

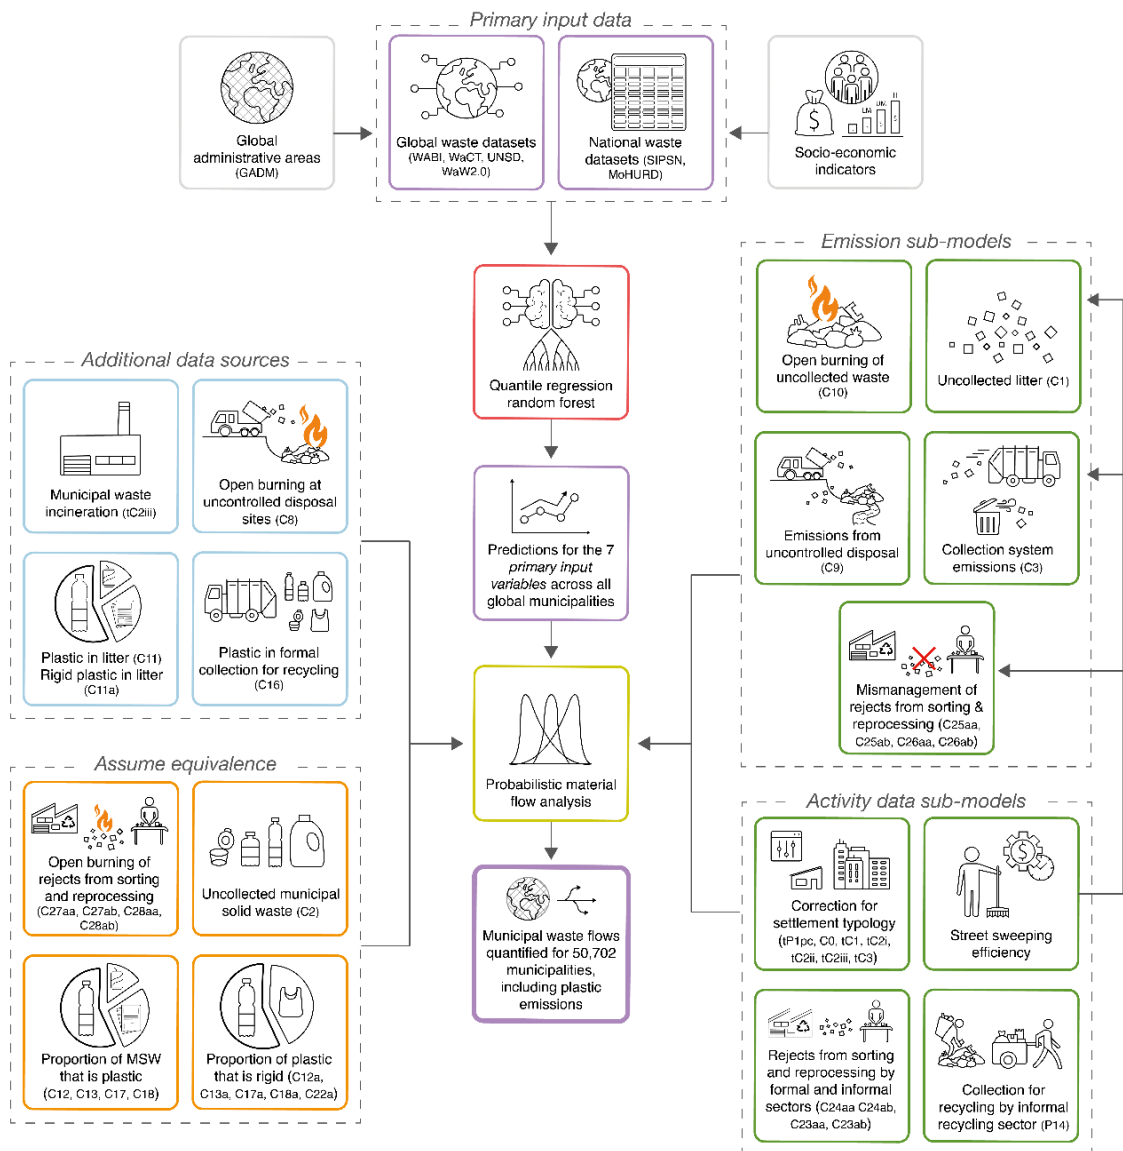

**Fig. S3.** Derivation of data used in Stage 1 of the Spatio-temporal Quantification of Plastic Pollution Origins and Transportation model (SPOT). *Primary input data* are activity data measured at municipal level which have been quality checked, harmonised, and corrected. Blue, orange, and green boxes represent *secondary data* which are defined as follows: *Additional data sources* are transfer coefficients that have been obtained from sources that are not directly measured at municipal level and are assumed for modelling purposes; *Assumed equivalence* indicates where, in the absence of measured data, we have used a coefficient from another part of the model which is approximately equivalent to the data that would be expected in another; *Emission sub-models* were used to approximate the flow of material from the contained to uncontained state using a combination of activity data and abductive reasoning; *Activity data sub-models* are similar to emission sub-models except that they are used to approximate mass or

transfer coefficients within the model where measured data do not exist. Other definitions can be found in **Table S2** and **Table S3**. Abbreviations: Municipal solid waste (MSW).

Data indicating economic, social, geographical, and cultural status and development (hereafter *socioeconomic indicators*) were assigned to each screened data record and to a global list<sup>1</sup> of administrative areas (**MS4, Section S.7.1**) that were assessed as those most likely to reflect the municipal level data (**Section S.6.6**). These consisted of both national level *socioeconomic indicators* and sub-national *socioeconomic indicators*. Missing *socioeconomic indicators* were imputed using predictive mean matching method (**Section S.7.2**).

*Primary input data* alongside *socioeconomic indicators* (independent variables) were used to train quantile regression random forest machine learning models for each of the seven *primary input variables* (**MS5a, Section S.7.3**). Ten-fold cross validation with five repeats tuned the hyperparameters of each random forest model, before their suitability was assessed against a holdout test dataset. The quantile regression random forest models were then able to be used to predict solid waste management data for all global municipalities with data gaps, including associated uncertainty (**MS5b, Section S.7.3**).

Whereas metrics such as waste generation, waste composition, and less so, waste collection coverage, are routinely measured, there are flows in other parts of the waste management system which are rarely documented. To account for these unrecorded and in some cases, neglected material flows and phenomena, we have developed a series of sub-models which use a combination of indirectly related, measured activity data and objective reasoning to approximate SWM activity and mass (**Fig. S3**). Where appropriate, we have also used data from literature which is assumed to be equivalent to data required in our model (e.g., proportion of plastic that is rigid or flexible). For example, we assume that the open burning of rejects happens at the same rate as the open burning of uncollected waste. These data, termed *secondary data inputs* in combination with the *primary data inputs* allowed detailed information of municipal solid waste (MSW) management and plastic waste to be quantified for every municipality in the world. These sub-models and datasets were used in combination with machine learning outputs to feed into probabilistic material flow analysis as illustrated in **Fig. S3**.

*Primary input variables* and *secondary input variables* within each administrative boundary were assigned a probability distribution from which 5,000 random samples were drawn from each as part of a probabilistic material flow analysis using Monte Carlo simulation. Results of municipal level material flows were aggregated to generate results at multiple spatial scales such as at national, regional, and global level, including an assessment of uncertainty (**Section S.9**). This provided a harmonised global macroplastic pollution emission inventory suitable for reporting and ongoing monitoring.

## S.2 Scope

As with other global plastic pollution models<sup>2-5</sup>, our global inventory model focusses on municipal solid waste, meaning the flows of waste generated from households, commerce and trade, small businesses, office buildings and institutions (schools, hospitals, government buildings) following the UN-Habitat<sup>6</sup> definition which excludes construction and demolition, industry and sewage treatment. We exclude textiles; electrical and electronic equipment waste;

and waste material arising at sea. We model at municipal scale because that is the resolution at which waste is managed and which waste data are measured. Quantification of municipal waste flows begin at the point of waste generation. We do not consider upstream stages such as production or consumption of goods because our method is focused on the waste management phase.

‘Embedded plastics’, for example those as part of assemblies of items or appended or adhered to non-plastic items are assumed to be included in our model, despite the uncertainty of their inclusion in measured source data.

Plastics waste exports from high income countries (HICs) have been justifiably highlighted as a potential contributor to plastic pollution in the Global South where rejects are at higher risk of being mismanaged<sup>7</sup>. However, in recent years the global secondary materials markets have changed substantially and we assert that they have become a distraction from more prevalent emissions sources<sup>8</sup>.

We deliberately omit plastic waste exports from our analysis for two reasons: (1) Attributing plastic waste exports to a municipal source and recipient is a complex task and the data to do such analysis are not available; and (2) Since the near complete ban on imported plastic waste by China in 2018<sup>9</sup>, more recent changes to the Basel Convention<sup>10</sup>, and to EU Regulation 1013/2006<sup>11</sup>, plastic waste exports from OECD countries to the Global South have plummeted to less than  $1.3 \text{ Mt} \cdot \text{y}^{-1}$  (12,13). Based on the mean plastic waste emitted from recycling system rejects across all the countries in the Global South (approximately 1 Mt), approximately 2% of the 50 Mt collected for recycling is emitted into the environment. From this we can approximate an emission burden of  $0.03 \text{ Mt} \cdot \text{y}^{-1}$  from HIC exports; virtually all of which (95%) can be attributed to eight countries: Japan, Netherlands, United States, Germany, Belgium, United Kingdom, Australia, and Italy. Although we acknowledge that these emissions may affect the per capita burden in a few HICs, we argue that the overall contribution is negligible in the context of  $52.5 \text{ Mt} \cdot \text{y}^{-1}$  plastic waste emissions worldwide. Therefore, we concluded that the very large and complex task of including exported plastic waste in our model framework was unjustified as the proportion of emissions is comparatively exiguous.

The concept of ‘mismanaged waste’ is not used as the basis for modeling here. Instead, we describe the complex flows of waste through the technosphere and the emission of waste plastic from five separate sources into the unmanaged system (**Fig. S1**). Each source considers the type of emission (with open burning of plastic distinct from particles of solid waste, termed here ‘debris’), as well as the format of the plastic (rigid versus flexible). Microplastics are omitted from our analysis which focusses on the macroplastic fraction, items and particles  $>5 \text{ mm}$  across any spatial dimension<sup>14</sup>.

### S.3 Solid waste management data

Solid waste management data vary substantially in both availability and reliability<sup>15</sup>. In the Global South, where waste is seldom weighed, waste generation is often estimated by counting trucks entering the disposal sites and applying assumptions<sup>16</sup>. Aside from the inaccuracy of this method, it does not account for the many other pathways through which waste flows. For example, waste which has not been collected is often burned, buried, dumped into waterways, or



deposited on the surface of the land<sup>5</sup>. The informal recycling sector also collect valuable materials, sometimes before they leave the premises of the household or business in which they were generated<sup>17</sup>. The reliability of waste composition data is also highly variable, particularly in parts of the Global South<sup>18</sup>. There is even evidence that some well-funded high income country waste characterisation studies are carried out without consideration of statistical representation of samples<sup>19</sup>. Collection coverage is often estimated because it is not straightforward to measure that which has not been managed. The number of households and businesses which do not receive a service can be used as a proxy. Speculatively, in cases where waste management services are minimal, the resources to make such estimations may also be lacking. Moreover, there may be political interest in under- or over-reporting statistics. For instance in India, official data include only a small proportion of MSW generated, and high collection coverage (95.4%) throughout the country<sup>20</sup>. In practice the data exclude rural areas and many towns and villages, meaning waste generation is underestimated by a factor of between 4 and 7<sup>20-22</sup>.

As we highlight in this study, measurement of waste generation and management takes place at municipal or sub-municipal level, and in the Global South, it is focused primarily on urban areas. National waste management datasets are created by aggregating these municipal measurements<sup>23</sup>. However, because there are often insufficient resources to keep records in all municipalities, many are interpolated for the purposes of national scale aggregation<sup>16</sup>. Whereas all other plastic pollution models use nationally aggregated data, which are either distributed (allocated) to a finer resolution (top-down approach), our model uses municipal scale data which are scaled upwards (bottom-up approach). By doing so, we aim to represent observable local scale variability between municipal waste management practices. As interventions to tackle plastic pollution often require localised intelligence, our model can identify locations where plastic pollution is most problematic and enable decisionmakers to target their scarce resources.

## S.4 System maps

Flows of waste in 50,702 municipalities were mapped according to three distinct system maps (**Fig. S4-Fig. S8**) using material flow analysis (MFA)<sup>24</sup> as described in **Sections S.4.1, S.4.2, and S.4.3**.

### S.4.1 Tributary MFA

The first system map is a simplistic MFA, known hereafter as the '*Tributary MFA*' (**Fig. S4**) because it feeds the subsequent MFA where the results are calculated. This aimed to quantify the major flows of MSW managed by formal systems in every municipality worldwide, using data that is both directly measured by local authorities and commonly reported. For example, municipal waste generation rate (tP1), collection coverage (tC1), controlled disposal (tC3) and the proportions sent to various treatment and recovery facilities (tC2). Nomenclature is listed in **Supplementary Table 2**.

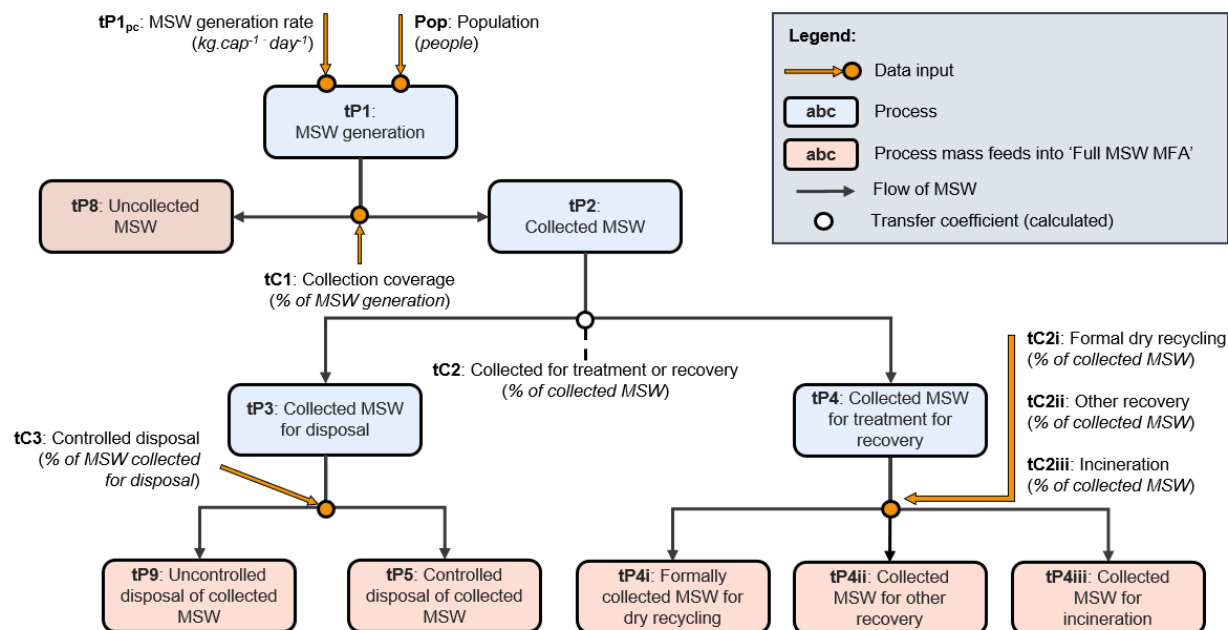

**Fig. S4.** Tributary material flow analysis (MFA) system map showing the major flows of municipal solid waste (MSW) formally managed in a municipality. Orange arrows represent data input points used to populate the processes and flows. Masses calculated for the pink process boxes feed through into the *Full MSW MFA* (Fig. S5).

The population of each municipality was multiplied by the MSW generation rate ( $kg \cdot cap^{-1} \cdot y^{-1}$ ) to arrive at an estimate of waste generation (tP1). The collection coverage (tC1) dictates how much waste is collected (tP2), and therefore enters the waste management system compared to the amount that remains uncollected (tP8) and is assumed to be self-managed by residents and other waste generators. Here, ‘self-management’ of waste includes ad-hoc activities carried out by individuals (households/workplaces) in order to manage discarded materials (waste) in the absence of formal managed service provision by a community, municipal or private entity. Activities include open burning; burying; scattering (dumping) on land; and dumping into waterways and coastal waters. The amount of collected waste sent for incineration (tP4iii), dry recycling (tP4i), and other recovery facilities (tP4ii) were summed to calculate the amount of waste going to treatment or recovery (tP4), whereas the remaining collected waste was transferred to land disposal (tP3) where it was further distributed by either controlled (tP5) or uncontrolled (tP9) disposal (defined in Table S2, Section S.5).

## S.4.2 Full MSW MFA

Whereas the *Tributary MFA* (Section S.4.1) provides a simplistic overview of the major MSW flows within a municipality, it is not detailed enough to quantify all MSW flows and therefore describe all plastic emission sources.

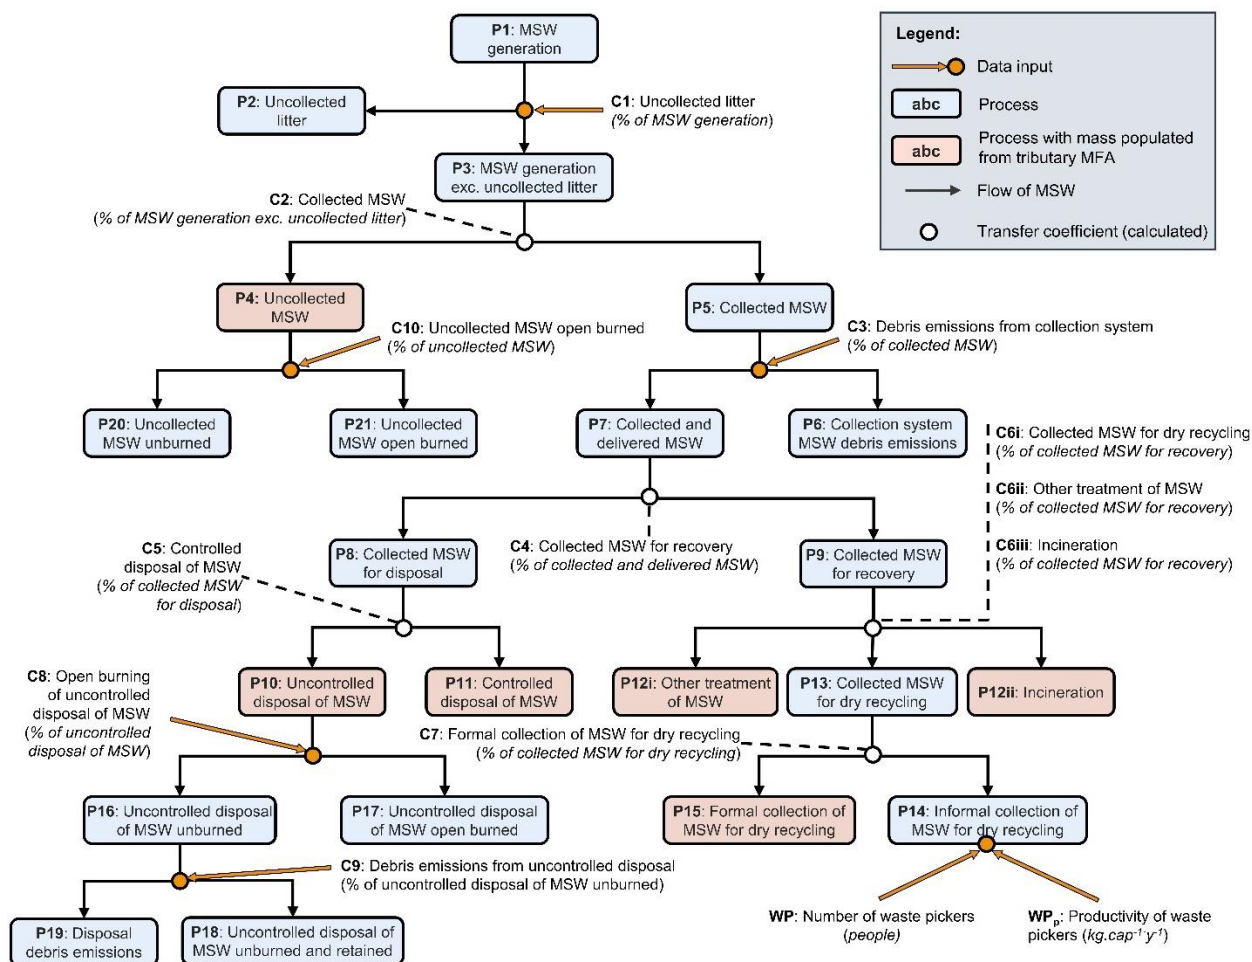

**Fig. S5.** Full municipal solid waste (MSW) material flow analysis (MFA) system map (*Full MSW MFA*). Orange arrows represent data input points used to populate the processes and flows of the MFA. The masses associated with the pink process boxes are populated from those in the *Tributary MFA* (Fig. S4).

Flows such as those which represent the amount of material collected by the informal recycling sector (IRS) (i.e., waste pickers) can be substantial across municipalities in the Global South<sup>25</sup>, but are often unreported because they occur outside of the formal waste management system<sup>26</sup>. Emissions of solid waste into the environment are also largely unreported because measuring them is challenging and most municipalities are not compelled or motivated to do so. For example, emissions are often spatially and temporally dispersed, can be orders of magnitude lower in mass than collected flows, and frequently depend on human behaviour and practices which are challenging to quantify (e.g., open burning). Nonetheless, quantification of flows that are neglected from formal reporting are required to estimate plastic emissions into the environment. The ‘*Full MSW MFA*’, incorporates these neglected flows to provide a more detailed map of MSW flows in each municipality (Fig. S5).

The *Full MSW MFA* uses the masses calculated in the *Tributary MFA* as inputs, as shown by the pink process boxes. Assignment of mass in this manner ensured that these processes match as closely as possible to the masses measured by municipalities. The remaining flows and processes

were calculated from these using transfer coefficients as described in **Section S.9**. A full system of equations describing the MFA calculations is presented separately in **Supplementary Table 2**.

### **S.4.3 Plastics MFA**

The final system map is the ‘*Plastics MFA*’, shown in **Fig. S6**, **Fig. S7** and **Fig. S8**. This MFA takes system MSW endpoints from the *Full MSW MFA*, converts them to plastic material flows, and then disaggregates them by rigid and flexible format according to the definitions proposed by Charles and Kimman<sup>27</sup>. Plastic flows are calculated at these system endpoints rather than for the *Full MSW MFA* to incorporate the plastic compositions which vary at different parts of the solid waste management system. For example, the proportion and composition of plastic in litter is likely to be different to the proportion and composition of plastic generated at the household level. Alternatively, if plastic flows were mapped throughout all the system, transfer coefficients on aspects such as the proportion of plastics sent to composting or incineration would need to be sourced. Data to evidence these parts of the system would be challenging to obtain and are largely irrelevant to the overall analysis. However, given the amount of plastic in MSW (C0) is commonly measured, we considered it advantageous to obtain these data to calculate plastic waste generation. Additionally, it provided a reliable proxy for plastic compositions at system ends points in situations where no other data were available.

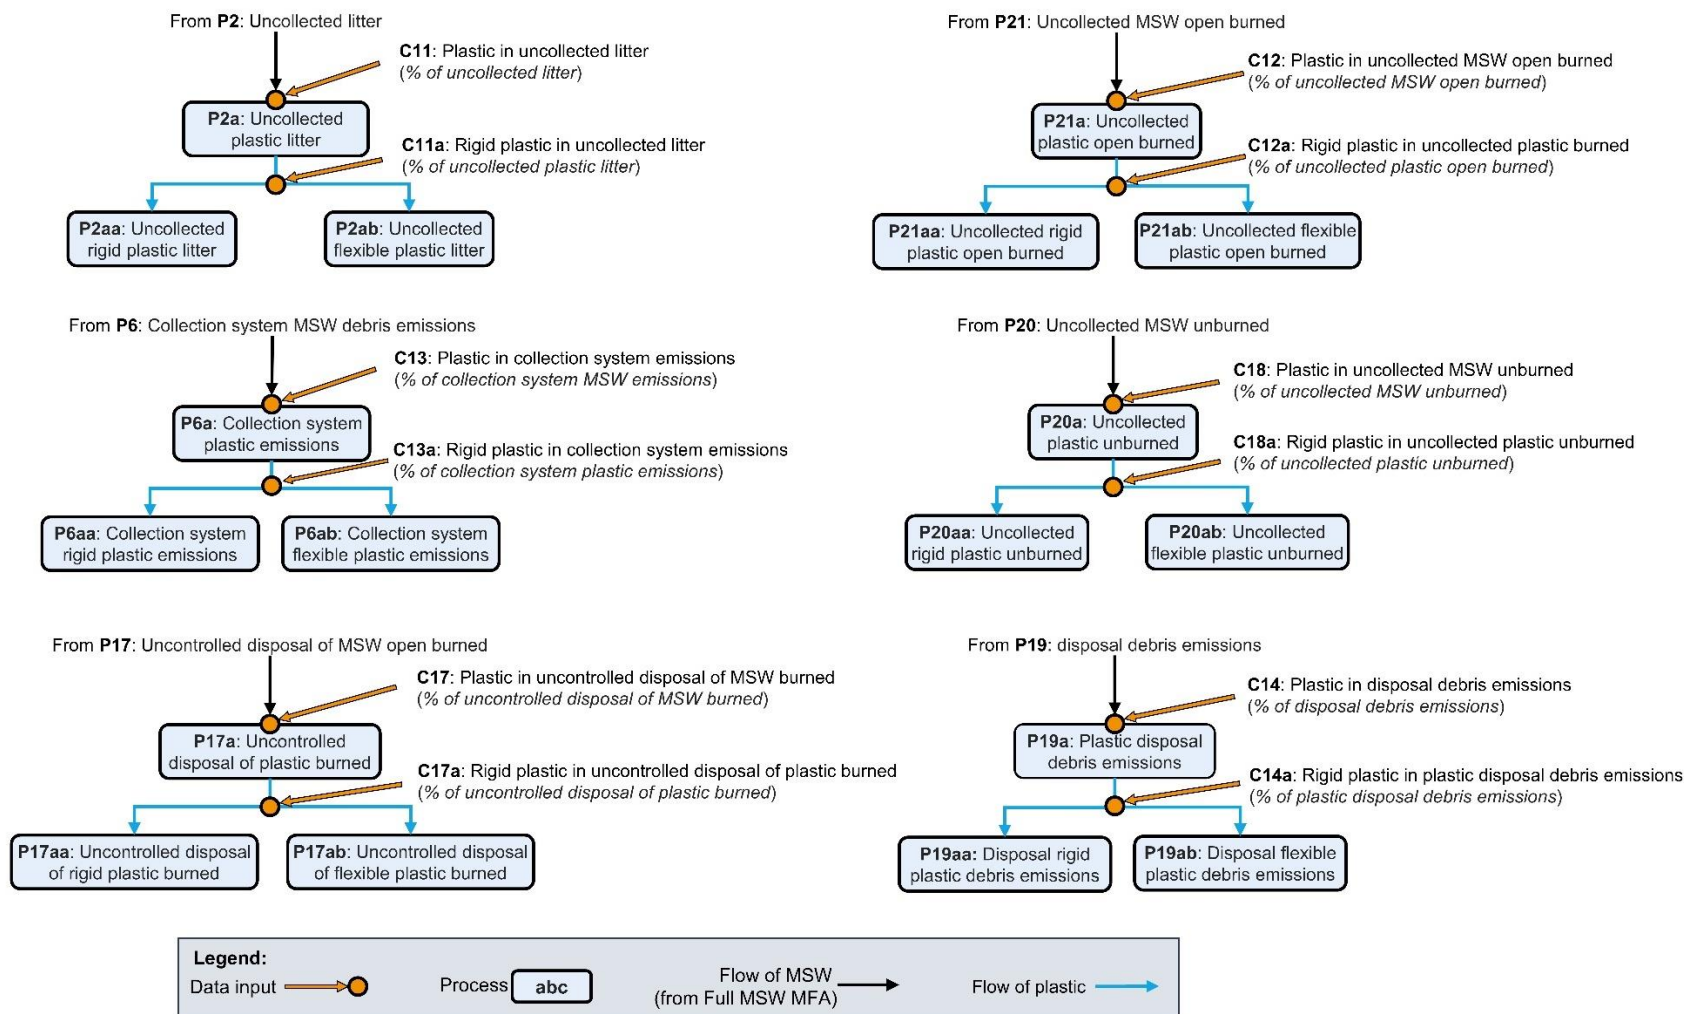

**Fig. S6.** Plastics material flow analysis (MFA) system map for uncollected litter, uncollected waste, collection system emissions, uncontrolled disposal, and disposal debris emissions. The *Plastics MFA* continues in **Fig. S7** and **Fig. S8** for informal and formal recycling flows respectively.

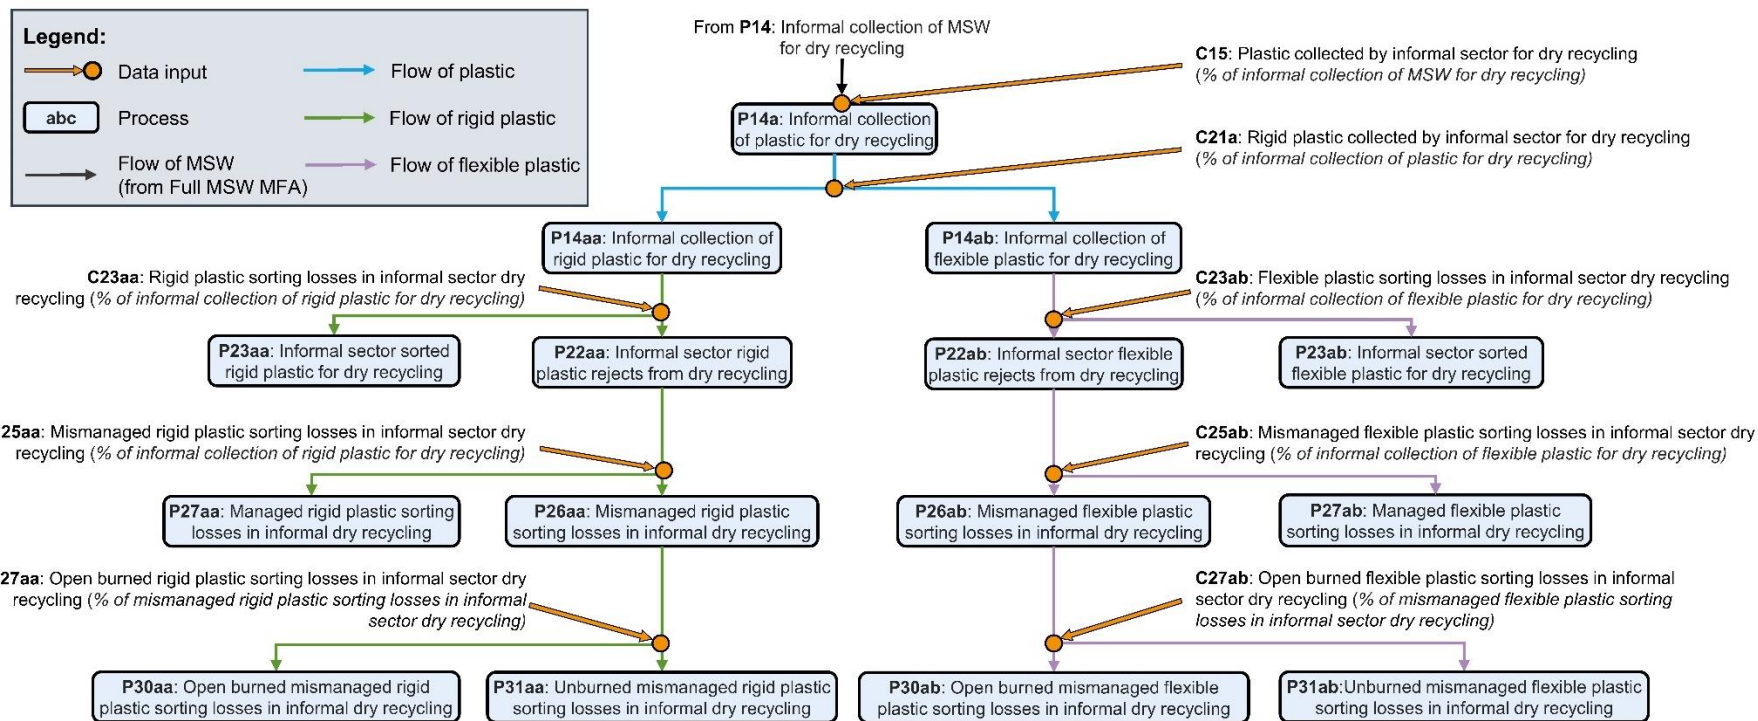

**Fig. S7.** Plastics material flow analysis (MFA) system map for sorting by the informal recycling sector (IRS).



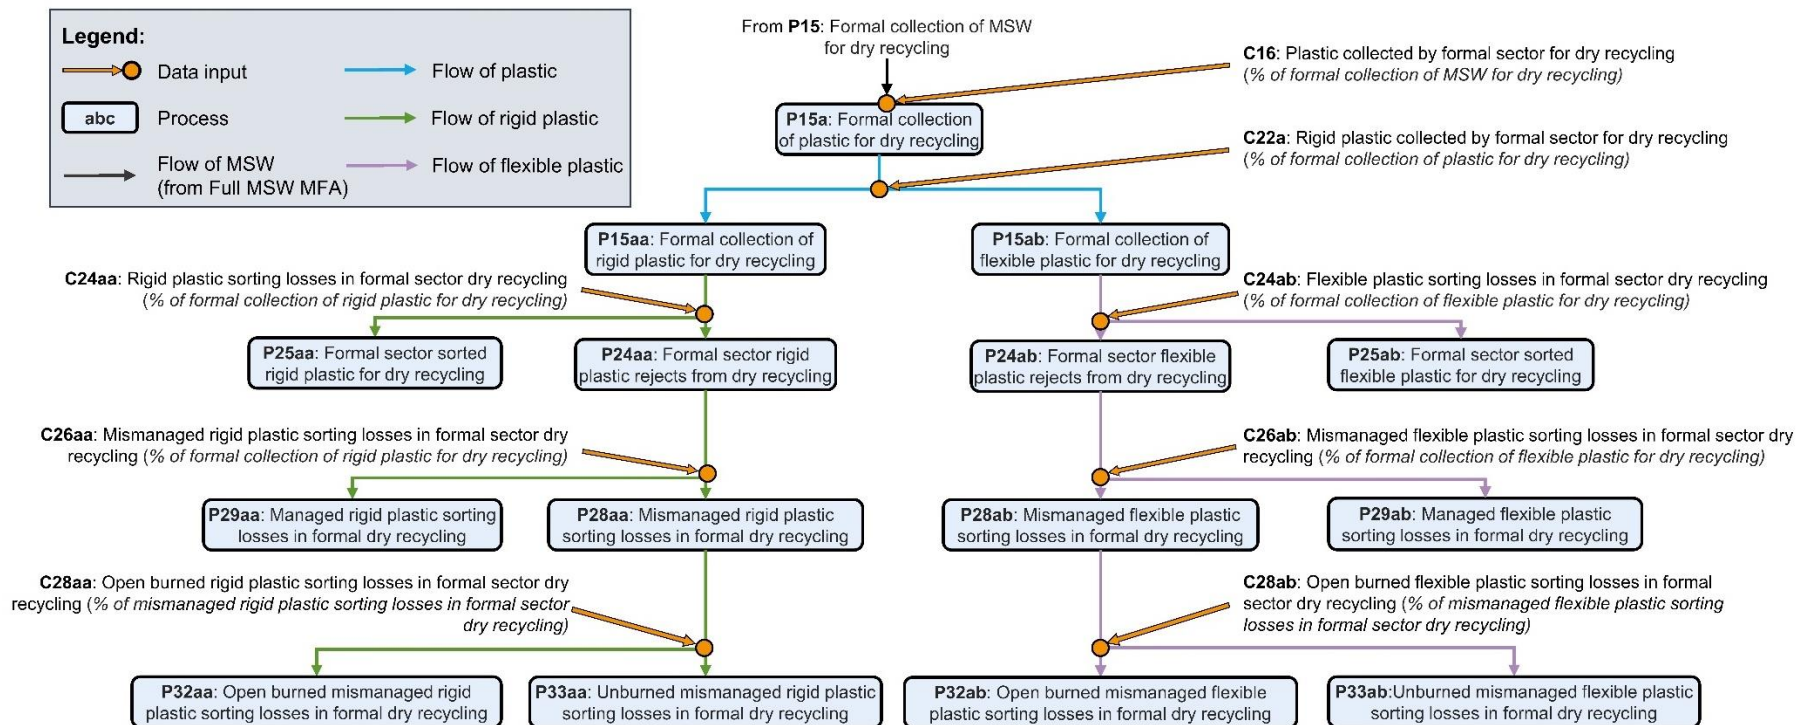

**Fig. S8.** Plastics material flow analysis (MFA) system map for sorting by the formal recycling sector.

The plastic sorting processes carried out by the formal and informal recycling sectors were disaggregated into both rigid and flexible plastic formats before assigning transfer coefficients on aspects such as the reject (loss) rate (**Fig. S7**: C23aa, C23ab, C24aa, C24ab). Here we define these reject rates as the amount of plastic collected for recycling that is subsequently discarded during sorting operations at the sorting or reprocessing stages. These transfer coefficients were derived via a sub-model described in **Section S.8.3** which considers recyclability and value of plastics to approximate the probability of material being positively selected for reprocessing.

There are 20 points in the MFA system where plastic is emitted into the environment (uncontrolled system), though these can be simplified to five generic ‘emission sources’ as shown in **Table S1**.

**Table S1.** System emissions: generic sources and specific components.

| Generic emission source |                          |                                     |          | Material format and mode of emission |       |        |       |
|-------------------------|--------------------------|-------------------------------------|----------|--------------------------------------|-------|--------|-------|
| ID#                     | Description              | Generic system emission component   |          | Debris                               |       | Burned |       |
|                         |                          |                                     |          | Rigid                                | Flex  | Rigid  | Flex  |
| GES-01                  | Uncollected waste        | Uncollected plastic                 |          | P20a                                 |       | P21a   |       |
|                         |                          |                                     |          | P20aa                                | P20ab | P21aa  | P21ab |
| GES-02                  | Litter                   | Uncollected plastic litter          |          | P2a                                  |       | -      |       |
|                         |                          |                                     |          | P2aa                                 | P2ab  | -      | -     |
| GES-03                  | Collection system        | Collection system plastic emissions |          | P6a                                  |       | -      |       |
|                         |                          |                                     |          | P6aa                                 | P6ab  | -      | -     |
| GES-04                  | Disposal system          | Uncontrolled disposal of plastic    |          | P19a                                 |       | P17a   |       |
|                         |                          |                                     |          | P19aa                                | P19ab | P17aa  | P17ab |
| GES-05                  | Sorting and reprocessing | Mismanaged sorting rejects          | Formal   | P33aa                                | P33ab | P32aa  | P32ab |
|                         |                          |                                     | Informal | P31aa                                | P31ab | P30aa  | P31ab |

## S.5 Data inputs

Data on solid waste management was collected at a municipal level using existing published data sources, as discussed in **Sections S.6.1** and **S.6.2**. This data was required to populate the MFAs from **Section S.4** and can be divided into two main categories:

|                              |                                                                                                                                                                                    |
|------------------------------|------------------------------------------------------------------------------------------------------------------------------------------------------------------------------------|
| <i>Primary data inputs</i>   | Data on solid waste management that is widely measured by municipalities and of which large amounts of data exist.                                                                 |
| <i>Secondary data inputs</i> | Data on solid waste management that are infrequently measured by municipalities, and for which limited data exists yet is critical to include in plastic pollution quantification. |

The *Tributary MFA* was populated solely by the *primary data inputs*, as shown in **Table S2**. Further description on the sources and methods use to collect, harmonise, and clean the data is discussed in **Section S.6**.



355 **Table S2.** *Primary data inputs* used to populate the *Tributary MFA*.

| ID                | Name                                        | Unit                                         | Description                                                                                                                                                                                                                                                                                                                                                                                                                                                       | Source |
|-------------------|---------------------------------------------|----------------------------------------------|-------------------------------------------------------------------------------------------------------------------------------------------------------------------------------------------------------------------------------------------------------------------------------------------------------------------------------------------------------------------------------------------------------------------------------------------------------------------|--------|
| Pop               | Population                                  | People                                       | Number of people living within a specified boundary                                                                                                                                                                                                                                                                                                                                                                                                               | 28     |
| tP1 <sub>pc</sub> | MSW generation rate                         | kg·cap <sup>-1</sup> ·d <sup>-1</sup>        | Waste generated from households, commerce and trade, small businesses, office buildings and institutions (schools, hospitals, government buildings). It also includes bulky waste (e.g., white goods, old furniture, mattresses) and waste from selected municipal services, e.g., waste from park and garden maintenance, waste from street cleaning services (street sweepings, the content of litter containers, market cleansing waste), if managed as waste. |        |
| tC1               | Collection coverage                         | % wt. of MSW generated                       | Waste that has been collected with the intention or purported intention to transport it to a place for treatment or disposal. Waste can be collected by public authorities, commercial entities.                                                                                                                                                                                                                                                                  |        |
| tC2i              | Formal collection of MSW for dry recycling  | % wt. of formally collected MSW              | Waste collection by the formal sector with the intention, or purported intention of delivering it to a facility where it can be sorted and or reprocessed to recover material value.                                                                                                                                                                                                                                                                              |        |
| tC2ii             | Formal collection of MSW for other recovery | % wt. of formally collected MSW              | Waste collection by the formal sector with the intention, or purported intention of delivering it to a facility where it can be treated or processed through composting, anaerobic digestion, or processes which recover energy or materials other than incineration or recycling.                                                                                                                                                                                | 29-34  |
| tC2iii            | Formal collection of MSW for incineration   | % wt. of formally collected MSW              | Waste collection with the intention, or purported intention of delivering it to a combustion facility where it will be processed with or without energy recovery. This definition also includes solid recovered fuel production, regardless of where the combustion takes place.                                                                                                                                                                                  |        |
| tC3               | Controlled disposal of MSW                  | % wt. of formally collected MSW for disposal | A facility to which waste is transported for the purposes of material or energetic recovery or disposal. Controlled facilities are operated under basic, improved, or full control according to the Ladder of waste management facilities' control level defined in the UN-Habitat <sup>6</sup> Waste Wise Cities Tool.                                                                                                                                           |        |
| C0                | Plastic in MSW*                             | % wt. of MSW generated                       | Proportion (wt. as received.) of plastic material as proportion of total waste.                                                                                                                                                                                                                                                                                                                                                                                   |        |
| C0a               | Rigid plastic in MSW*                       | % wt. of MSW plastic generated               | Proportion (wt. as received.) of rigid format plastic material as proportion of all plastic.                                                                                                                                                                                                                                                                                                                                                                      |        |

356 \* These inputs were not used in *Tributary MFA* but are still grouped as a *Primary data input* as they widely measured data points  
357 and collected from the same datasets as above.

358 The mass calculated for each process in the *Tributary MFA* was assigned to the *Full MSW MFA*  
359 and *Plastics MFA*, with the *secondary data inputs* (**Table S3**) used to populate the remaining  
360 flows and processes. Sourcing of the inputs relied on a combination of assigning any existing  
361 data to archetypes (e.g., country income categories), modelling based on available data and  
362 known relationships, or as a last resort, assumptions. Details of the sources used, and analysis is  
363 discussed further in **Section S.7**.

364 **Table S3.** *Secondary data inputs* used to populate *Full MSW MFA* and *Plastics MFA*.

| ID              | Name                                   | Unit                                      | Description                                                                                                                                                                                                                 | Source                                                  |
|-----------------|----------------------------------------|-------------------------------------------|-----------------------------------------------------------------------------------------------------------------------------------------------------------------------------------------------------------------------------|---------------------------------------------------------|
| WP              | Number of informal waste pickers       | People                                    | The number of people engaged in waste collection activities (for the purposes of waste recovery or as a service) who do not operate under contracts with formal authorities or are unlicensed to carry out such activities. | Modelled based on available data ( <b>Section S.7</b> ) |
| WP <sub>p</sub> | Productivity of informal waste pickers | tonnes·cap <sup>-1</sup> ·y <sup>-1</sup> | The average amount of waste that is collected by informal waste pickers.                                                                                                                                                    |                                                         |

| ID   | Name                                                  | Unit                                                     | Description                                                                                                                                                                                                                                                             | Source                                         |
|------|-------------------------------------------------------|----------------------------------------------------------|-------------------------------------------------------------------------------------------------------------------------------------------------------------------------------------------------------------------------------------------------------------------------|------------------------------------------------|
| C1   | Uncollected litter                                    | % of MSW generation                                      | Waste generated on-the-go (in the public domain) that is discarded directly by humans into the environment without having previously been concentrated or containerised and which is not collected and managed.                                                         |                                                |
| C3   | Debris emissions from collection system               | % of collected MSW                                       | Waste that has been concentrated and presented for collection or which has been collected and which subsequently escapes from containers or vehicles prior to being deposited at a transfer, storage, treatment, or disposal facility.                                  |                                                |
| C8   | Open burning of uncontrolled disposal                 | % of uncontrolled disposal of MSW                        | Waste that has been deposited in an uncontrolled disposal facility and which is subsequently combusted in an open uncontrolled fire, accidentally, intentionally, or spontaneously.                                                                                     | Based on <sup>6,35</sup> (Section S.7)         |
| C9   | Debris emissions from uncontrolled disposal of MSW    | % of uncontrolled disposal of MSW unburned               | Waste that has been deposited in an uncontrolled disposal facility which has not been combusted in open uncontrolled fires and which is subsequently emitted from that uncontrolled facility into the environment through the action of wind, surface water or gravity. | Modelled based on available data (Section S.7) |
| C10  | Uncollected MSW openly burned                         | % of uncollected MSW                                     | Material that has not been collected and which is subsequently combusted in an open uncontrolled fire, accidentally, intentionally, or spontaneously.                                                                                                                   |                                                |
| C11  | Plastic in uncollected litter                         | % of uncollected litter                                  | The proportion of waste material which is characterised as plastic.                                                                                                                                                                                                     | <sup>36</sup>                                  |
| C12  | Plastic in uncollected MSW openly burned              | % of uncollected MSW openly burned                       | The proportion of uncollected waste material which is characterised as plastic, and which is openly burned.                                                                                                                                                             | Assumed same as plastic in MSW (C0)            |
| C13  | Plastic in collection system debris emissions         | % of collection system debris emissions                  | The proportion of collection system debris emissions which is plastic.                                                                                                                                                                                                  |                                                |
| C14  | Plastic in disposal debris emissions                  | % of disposal debris emissions                           | The proportion of debris emissions from uncontrolled disposal of MSW which is characterised as plastic.                                                                                                                                                                 | Assumed (Section S.7)                          |
| C15  | Plastic collected by informal recycling sector        | % of informal sector collection of MSW for dry recycling | The proportion of waste collected by informal waste pickers which is characterised as plastic.                                                                                                                                                                          | Modelled based on available data (Section S.7) |
| C16  | Plastic collected by formal recycling sector          | % of formal sector collection of MSW for dry recycling   | The proportion of waste collected for recycling by the formal sector which is characterised as plastic.                                                                                                                                                                 | <sup>37</sup>                                  |
| C17  | Plastic in uncontrolled disposal of MSW openly burned | % of uncontrolled disposal of MSW openly burned          | The proportion of waste material which is deposited in uncontrolled disposal sites and openly burned, and which is characterised as plastic.                                                                                                                            | Assumed same as plastic in MSW (C0)            |
| C18  | Plastic in uncollected MSW unburned                   | % of uncollected MSW unburned                            | The proportion of waste material that has not been collected and which is dumped as debris into the environment, and which is characterised as plastic.                                                                                                                 |                                                |
| C11a | Rigid plastic in uncollected litter                   | % of uncollected plastic litter                          | The proportion of plastic waste in uncollected litter which we describe as 'rigid', according to the definitions proposed by Charles and Kimman <sup>27</sup> .                                                                                                         | <sup>36</sup>                                  |
| C12a | Rigid plastic in uncollected plastic openly burned    | % of uncollected plastic openly burned                   | The proportion of uncollected rigid plastic waste which is burned in open uncontrolled fires.                                                                                                                                                                           | Assumed same as rigid plastic in MSW (C0a)     |
| C13a | Rigid plastic in collection system debris emissions   | % of collection system plastic debris emissions          | The proportion of collection system plastic debris emissions which is rigid.                                                                                                                                                                                            |                                                |

| <b>ID</b> | <b>Name</b>                                                                | <b>Unit</b>                                                          | <b>Description</b>                                                                                                                                                                                                     | <b>Source</b>                                           |
|-----------|----------------------------------------------------------------------------|----------------------------------------------------------------------|------------------------------------------------------------------------------------------------------------------------------------------------------------------------------------------------------------------------|---------------------------------------------------------|
| C14a      | Disposal system rigid plastic debris emissions                             | % of disposal system plastic debris emissions                        | The proportion of disposal system plastic debris emissions which is rigid.                                                                                                                                             | Assumed ( <b>Section S.7</b> )                          |
| C17a      | Rigid plastic in uncontrolled disposal of plastic openly burned            | % of uncontrolled disposal of plastic openly burned                  | The proportion of plastic waste in the disposal system which is burned in open uncontrolled fires and which is rigid.                                                                                                  | Assumed same as rigid plastic in MSW (C0a)              |
| C18a      | Rigid plastic in uncollected plastic unburned                              | % of uncollected plastic unburned                                    | The proportion of uncollected plastic waste which is rigid.                                                                                                                                                            |                                                         |
| C21a      | Rigid plastic in informal collection for recycling                         | % of informal sector collection of plastic for dry recycling         | The proportion of plastic waste collected by the informal recycling which is rigid.                                                                                                                                    | Modelled based on available data ( <b>Section S.7</b> ) |
| C22a      | Rigid plastic in formal collection for recycling                           | % of formal sector collection of plastic for dry recycling           | The proportion of plastic waste collected by the formal recycling which is rigid.                                                                                                                                      | Assumed same as rigid plastic in MSW (C0a)              |
| C23aa     | Informal sector sorting rejects of rigid plastic                           | % of rigid plastic collected by informal sector for dry recycling    | The proportion of informal sector rigid plastics, collected for recycling, which is rejected at the sorting or reprocessing stage.                                                                                     | Modelled based on available data ( <b>Section S.7</b> ) |
| C23ab     | Informal sector sorting rejects of flexible plastic                        | % of flexible plastic collected by informal sector for dry recycling | The proportion of informal sector flexible plastics, collected for recycling, which is rejected at the sorting or reprocessing stage.                                                                                  |                                                         |
| C24aa     | Formal sector sorting rejects of rigid plastic                             | % of rigid plastic collected by formal sector for dry recycling      | The proportion of formal sector rigid plastics, collected for recycling, which is rejected at the sorting or reprocessing stage.                                                                                       |                                                         |
| C24ab     | Formal sector sorting rejects of flexible plastic                          | % of flexible plastic collected by formal sector for dry recycling   | The proportion of formal sector flexible plastics, collected for recycling, which is rejected at the sorting or reprocessing stage.                                                                                    |                                                         |
| C25aa     | Unmanaged rigid plastic sorting rejects by informal sector                 | % of informal sector rigid plastic sorting rejects                   | The proportion of sorting rejects from rigid plastic waste collected for recycling by the informal sector, which is unmanaged, meaning it is not collected and transferred to a facility (controlled or otherwise).    | Assumed ( <b>Section S.8.3</b> )                        |
| C25ab     | Unmanaged flexible plastic sorting rejects by informal sector              | % of informal sector flexible plastic sorting rejects                | The proportion of sorting rejects from flexible plastic waste collected for recycling by the informal sector, which is unmanaged, meaning it is not collected and transferred to a facility (controlled or otherwise). |                                                         |
| C26aa     | Unmanaged rigid plastic sorting rejects by formal sector                   | % of formal sector rigid plastic sorting rejects                     | The proportion of sorting rejects from rigid plastic waste collected for recycling by the formal sector, which is unmanaged, meaning it is not collected and transferred to a facility (controlled or otherwise).      |                                                         |
| C26ab     | Unmanaged flexible plastic sorting rejects by formal sector                | % of formal sector flexible plastic sorting rejects                  | The proportion of sorting rejects from flexible plastic waste collected for recycling by the formal sector, which is unmanaged, meaning it is not collected and transferred to a facility (controlled or otherwise).   |                                                         |
| C27aa     | Open burning of unmanaged rigid plastic sorting rejects by informal sector | % of informal sector unmanaged rigid plastic sorting rejects         | The proportion of unmanaged rigid plastic rejected during sorting and reprocessing by the informal recycling sector that is subsequently burned in open uncontrolled fires.                                            | Assumed same as C10                                     |

| ID    | Name                                                                          | Unit                                                            | Description                                                                                                                                                                    | Source |
|-------|-------------------------------------------------------------------------------|-----------------------------------------------------------------|--------------------------------------------------------------------------------------------------------------------------------------------------------------------------------|--------|
| C27ab | Open burning of unmanaged flexible plastic sorting rejects by informal sector | % of informal sector unmanaged flexible plastic sorting rejects | The proportion of unmanaged flexible plastic rejected during sorting and reprocessing by the informal recycling sector that is subsequently burned in open uncontrolled fires. |        |
| C28aa | Open burning of unmanaged rigid plastic sorting rejects by formal sector      | % of formal sector unmanaged rigid plastic sorting rejects      | The proportion of unmanaged rigid plastic rejected during sorting and reprocessing by the formal recycling sector that is subsequently burned in open uncontrolled fires.      |        |
| C28ab | Open burning of unmanaged flexible plastic sorting rejects by formal sector   | % of formal sector unmanaged flexible plastic sorting rejects   | The proportion of unmanaged flexible plastic rejected during sorting and reprocessing by the formal recycling sector that is subsequently burned in open uncontrolled fires.   |        |

## S.6 Primary data collection, harmonisation, correction, and cleaning

### S.6.1 Global municipal-level solid waste management *primary input data* sources (MS1a)

Solid waste generation and management data for municipalities across the world were obtained from four sources<sup>29-32</sup> as shown in **Table S4**.

**Table S4.** Global municipal-level solid waste management *primary input data* sources.

| Quality assurance hierarchy | Primary input data source                                                 | Data year(s) | Scale  | Number of locations (records) | Methodology and quality assurance                                                                                                                                                                                   |
|-----------------------------|---------------------------------------------------------------------------|--------------|--------|-------------------------------|---------------------------------------------------------------------------------------------------------------------------------------------------------------------------------------------------------------------|
| 1                           | Waste Wise Cities Tool (WaCT) <sup>29</sup>                               | 2019 - 2022  | Global | 38*                           | Primary data collection as described in the WaCT user manual <sup>6</sup> . Quality assurance is checked based on data coherence and comparison against other datasets (e.g. What a Waste 2.0 data <sup>30</sup> ). |
| 2                           | Wasteaware Cities Benchmark Indicators (WABI) <sup>31</sup>               | 2007 - 2018  | Global | 71                            | Secondary data used with some quality assurance checks by waste management experts <sup>38</sup>                                                                                                                    |
| 3                           | What a Waste 2.0 (WaW2.0) cities data <sup>30</sup>                       | 2018         | Global | 368                           | Combination of secondary data collected by literature reviews and questionnaire. Data quality assessment unclear but believed to be via data coherence calculations (e.g. percentages sum to 100).                  |
| 4                           | United Nations Statistics Division (UNSD) Cities Waste data <sup>32</sup> | 1989 - 2019  | Global | 237**                         | Data submitted by cities via a questionnaire provided by UNSD <sup>39</sup> . Data quality assessed via data coherence calculations (e.g. percentages sum to 100).                                                  |

\* As of April 2023; \*\* Latest available year

Data for 714 municipalities in 180 countries were extracted from the global datasets, although this number reduced to 553 municipalities after removal of duplicate locations or during the screening and cleaning stages (**Section S.6.4**).

All global data sources had variable data years, dating back to 1989 in the case of the UNSD waste data. Data older than 15 years (2006 at time of analysis) was excluded as it was assumed that waste management has changed substantially since then, thereby reducing its relevance. This exclusion had only limited impact as most locations had data for more recent years. Following the data cleaning phase, the mean and median year of the *primary data inputs* was 2015. With further efforts in data collection occurring at a rapid pace in recent years, particularly as part of the UN-Habitat<sup>6</sup> Waste Wise Cities Tool official data collection effort associated with the quantification and monitoring of the SDG target 11.6.1 of environmentally sound management of solid waste in cities, it is envisaged that more up to date data can be harnessed in the future. However, at present we maximised data quantity and quality over data year relevance.

Each global data source had its own methodology for data collection (**Table S4**), which had to be understood so that data could be harmonised and corrected where necessary (**Section S.6.4**). Quality assurance measures implemented by the data source administrators and investigators were also assessed. This enabled us to prioritise records which were duplicated across multiple datasets and to inform the data-cleaning phase. The WaCT data were assumed to have the highest quality because they were recently obtained using a standardised primary sampling method<sup>6</sup> and then quality checked for coherence by experts. The WABI data were assumed the next highest quality because it was checked by waste management experts alongside wider additional checks<sup>38,40</sup>. The quality assurance for WaW2.0 city data and UNSD city waste data is believed to mainly be via data coherence calculations only, for example, where percentages are checked to sum to 100%. Based on our own assessment of the data quality, we assigned a higher priority to the WaW2.0 data compared to UNSD city waste data.

## S.6.2 National municipal-level solid waste management data sources (MS1b)

In addition to the four global-scale data sources (WaW2.0, WaCT, WABI and UNSD), municipal level data were extracted from two national databases as shown in **Table S5**. Specifically, the national waste databases of Indonesia<sup>34</sup> and China<sup>33</sup> were included due to previous works<sup>2,3</sup> highlighting these countries as key contributors to plastic pollution and only limited municipal-level data being available for these from the four global datasets.

**Table S5.** National municipal-level solid waste management *primary input data* sources.

| Primary input data source                                              | Data year(s) | Scale     | Number of locations (records) | Methodology and quality assurance                                                                                                                          |
|------------------------------------------------------------------------|--------------|-----------|-------------------------------|------------------------------------------------------------------------------------------------------------------------------------------------------------|
| Sistem Informasi Pengelolaan Sampah Nasional (SIPSN) <sup>34</sup>     | 2020         | Indonesia | 502 (10 records extracted)    | Data are uploaded by representatives from municipalities. Data quality assurance is not reported.                                                          |
| Ministry of Housing and Urban-Rural Development (MoHURD) <sup>33</sup> | 2019         | China     | 676* (47 records extracted)   | Data provenance is unclear, though it is assumed that records are submitted to the Ministry by the municipalities. Data quality assurance is not reported. |

\* Sub-Provincial level

Data record extraction from the national databases of China and Indonesia was limited to 2% of the total national records to avoid overrepresentation and potential biasing in the subsequent machine learning steps (**Section S.7**). Records were chosen at random and filtered according to the following conditions:

- Only data for urban areas was selected (as discussed in **Section S.7.1**).

- Only data with a high level of certainty with regards to administrative area matching were selected ( $\geq 60\%$  similarity for China municipalities or score of 1 for Indonesian municipalities, as discussed in **Section S.6.3**)

The motivation behind the selection of only urban data points was to ensure compatibility with the four global datasets, which predominantly included data for urban areas, whereas the other filter was applied to ensure data quality.

The most recent published year was chosen for each of the countries at the time of analysis, giving data from 2020 for Indonesia and 2019 for China. Data quality assurance and provenance for the two datasets was not clearly stated by either. It is assumed that data are uploaded directly by municipal authorities, and assessment of the content infers that only limited quality assurance is carried out in each case. We assessed each of these datasets in full, flagging anomalies and suspected data entry errors; only including data that appeared to be entered correctly.

### **S.6.3 Assignment of administrative areas (MS2)**

The Global Administrative Areas (GADM) dataset V3.6<sup>1</sup> is a geographical information systems (GIS) database including 386,733 polygons that represent up to five administrative area levels within each country.

The number of boundaries used by national administrations to organise their political, economic, and social affairs varies between countries, with some having just a single national boundary (Level 0) and others having many thousands of districts (L04) and sub-districts (L05), as is the case with France or Rwanda.

Although the data extracted from the sources outlined in **Table S4** and **Table S5** were predominantly municipal level data, our analysis found the specific spatial boundary to which these data relate to be unclear in many cases. For example, data provided for ‘London’ may relate to either the City of London (population ~ 8,000) or Greater London (population ~ 9 million).

Each municipal waste data record (i.e. from WaW2.0, WaCT, WABI, UNSD, SIPSN or MoHURD) was assigned to a GADM administrative area<sup>1</sup> by comparing the similarity between: 1) The population reported alongside the original primary data record and the population calculated by summing GIS population rasters for the years 2010, 2015 and 2020<sup>28,41</sup> across each GADM polygon; and 2) The urban extent of the city on a Google Maps hybrid layer with the GADM polygon boundary. Once a decision had been made about which administrative area best matched the data record, the GADM ID of that boundary was assigned to the data record. Additionally, a ‘GADM match’ score was assigned to denote how well we believed the data record matched the administrative area (**Table S6**).

Data for China published in the MoHURD dataset<sup>33</sup> were analysed slightly differently to those outlined in **Table S6** because of major discrepancies between those reported by MoHURD and those in the GADM V3.6 dataset<sup>1</sup>. This is for two main reasons: 1) MoHURD reports data in Chinese script for which translations into Roman Script have undergone methodological changes in recent years and are subject to the interpretation of software or human translator<sup>42</sup>; and 2) The Chinese Authority has implemented substantial reclassification of its sub-provincial

administrative areas over recent decades<sup>43</sup>, resulting in a mismatch between areas reported in MoHURD and in the GADM.

**Table S6.** Criteria for level of correlation between administrative areas<sup>1</sup> and municipal waste data records.

| Administrative area match score | Criteria                                                                                                                                                                                                                                                                                                                                                                                                                                                                                                                                                                                                                |
|---------------------------------|-------------------------------------------------------------------------------------------------------------------------------------------------------------------------------------------------------------------------------------------------------------------------------------------------------------------------------------------------------------------------------------------------------------------------------------------------------------------------------------------------------------------------------------------------------------------------------------------------------------------------|
| 1                               | The difference in population between that reported in data record compared to that calculated via GIS for the administrative area and for the nearest reported year is less than 20% or has plausibly increased or decreased during the intervening years. Additionally, the administrative area correlates well with the urban area based on Google Maps hybrid layer.                                                                                                                                                                                                                                                 |
| 2                               | The difference in population between that reported in data record compared to that calculated via GIS for the administrative area and for the nearest reported year is greater than 20%, but the administrative area correlates well with the urban area based on Google Maps hybrid layer <sup>44</sup> .<br>Alternatively, the difference in population between that reported in data record compared to that calculated via GIS for the administrative area and for the nearest reported year is less than 20%, but the administrative area correlates poorly with the urban area based on Google Maps hybrid layer. |
| 3                               | The difference in population between that reported in data record compared to that calculated via GIS for the administrative area and for the nearest reported year is greater than 20%, and the administrative area correlates poorly with the urban area based on Google Maps hybrid layer. Despite this, it is reasonable to conclude the data and administrative area refer broadly to the same location.                                                                                                                                                                                                           |
| 4                               | Unable to find appropriate match between the data record and administrative areas.                                                                                                                                                                                                                                                                                                                                                                                                                                                                                                                                      |

To address these challenges, the Chinese script names of the administrative areas (n=708) reported by MoHURD were translated into Roman Script using the Google Translate function within Google Sheets. Of these, 32 are reported by MoHURD as provinces and therefore assigned to Level 1, the remaining 676 were assumed to be Level 2 or 3 and were assigned to the closest matching GADM polygon following a four-step approach (**Table S7**).

**Table S7.** Description of steps taken to assign incineration and collection data from ministry of Housing and Urban Rural Development (MoHURD)<sup>33</sup> into the administrative areas according to the Database of Global Administrative Areas (GADM)<sup>1</sup>.

| Step | Description                                                                                                                                                                                                                                      | Number of municipalities |       | Number of municipalities assigned |     |     |       |
|------|--------------------------------------------------------------------------------------------------------------------------------------------------------------------------------------------------------------------------------------------------|--------------------------|-------|-----------------------------------|-----|-----|-------|
|      |                                                                                                                                                                                                                                                  | Removed (merged)         | Added | L01                               | L02 | L03 | Total |
| 1    | 1a Level 1 names matched                                                                                                                                                                                                                         |                          |       | 27                                |     |     | 27    |
|      | 1b Level 1 names adjusted                                                                                                                                                                                                                        |                          |       | 4                                 |     |     | 4     |
|      | 1c Level 1 Xinjiang merged with Xinjiang Uygur                                                                                                                                                                                                   | -1                       |       | 0                                 |     |     | 0     |
| 2    | 2a Translated Roman script names matched with either Level 2 or 3 unique IDs and population within 60%                                                                                                                                           |                          |       |                                   | 113 | 228 | 341   |
|      | 2b Translated Roman script names matched with either Level 2 or 3 unique IDs. Population below 60% match but correlation of GADM polygon with conurbations indicated the same area                                                               |                          |       |                                   | 68  | 96  | 164   |
|      | 3a Translated names in Roman script or original Chinese script compared with Google, Google maps and GADM layer then adjusted as necessary and allocated to Level 2 or 3 if population within 60%                                                |                          |       |                                   | 11  | 107 | 118   |
| 3    | 3b Translated names in Roman script or original Chinese script compared with Google, Google maps and GADM layer then adjusted as necessary. Population below 60% match but correlation of GADM polygon with conurbations indicated the same area |                          |       |                                   | 6   | 27  | 33    |

| Step          | Description                                                                                                                                            | Number of municipalities |          | Number of municipalities assigned |            |            |            |
|---------------|--------------------------------------------------------------------------------------------------------------------------------------------------------|--------------------------|----------|-----------------------------------|------------|------------|------------|
|               |                                                                                                                                                        | Removed (merged)         | Added    | L01                               | L02        | L03        | Total      |
| 4a            | Municipalities listed by MoHURD did not match with GADM but fell within another GADM boundary, therefore records combined with other validated records | -10                      |          |                                   |            | 0          | 0          |
| 4b            | Municipalities reported by MoHURD (n=4) matched with two GADM municipalities, so data distributed between them by population                           | -4                       | 8        |                                   |            | 8          | 8          |
| 4c            | Reassessment of population in the context of Level 3 municipalities already allocated showed good match at Level 2                                     |                          |          |                                   | 6          |            | 6          |
| <b>Totals</b> |                                                                                                                                                        | <b>-15</b>               | <b>8</b> | <b>31</b>                         | <b>204</b> | <b>466</b> | <b>701</b> |

Municipalities reported by MoHURD were assigned to GADM V3.6 polygons sequentially according to the steps detailed. The number of municipalities assigned to each Level during each step are listed under L01, L02, L03. Data for some municipalities had to be merged in steps 1c, 4a and 4b as the GADM reported areas that had since been split into smaller administrative areas by the Chinese authorities. Data for other municipalities had to be redistributed into two municipalities in Step 4b because the Chinese authorities have merged municipalities since creation of the GADM. Abbreviations: Global Administrative Database of Municipalities (GADM).

## S.6.4 Data harmonisation (MS3a), correction (MS3b) and quality screening (MS3c)

Municipal waste management data reported by each of the six *primary input data* sources (**Table S4** and **Table S5**) were not collected using consistent criteria and therefore had to be harmonised to enable aggregation into a combined dataset that contained parameters with approximately equivalent basis. Within each dataset, we also took steps to assess: the methods by which data were collected; the quality of the data; and whether data quality assurance had already been carried out by the researchers who compiled them. As shown in **Table S4** and **Table S5**, most of the data sources had only limited quality assurance, meaning substantial cleaning was required.

Numerous authors have highlighted that data reported by municipalities is often incorrect<sup>15,16,30,45</sup>. For example, municipalities often estimate MSW generation by measuring the amount of waste that arrives at a disposal site. However, if some waste is uncollected in the municipality, or if the informal recycling sector collect material before it reaches the disposal site, then that measured quantity would be underreported. Therefore, we corrected some reported MSW generation rates to approximately account for unrecorded material.

This section details the harmonisation, correction, and quality screening steps for each of the six *primary input data* sources used in our model.

### S.6.4.1 Waste Wise Cities Tool (WaCT)

The WaCT was developed by UN-Habitat<sup>6</sup> to assist and enable consistent and scientific collection of municipal level waste management related data across the world. The tool guides users through a series of steps aimed at quantifying the flows of waste through municipal solid waste systems, including household and commercial surveys. A WaCT Data Collection Application (DCA) assists users with collecting and analysing data. Summary results of data collected are available online via a dedicated data portal<sup>29</sup>.



MSW generation rate ( $tPI_{pc}$ ), collection coverage (tC1) and controlled disposal (tC3) were extracted directly from the WaCT DCA to obtain higher precision than the summarised numbers reported in the WaCT portal UN-Habitat<sup>29</sup>.

In the present work, we define controlled disposal using the WACT<sup>6</sup> definition of facilities ‘operated under basic, improved or full control according to the Ladder of waste management facilities’ control level’. We then made a series of assumptions (Sections S.6.4.2 - S.6.4.6) about how we harmonised other data source definitions with ours.

Additional inputs taken from the WaCT DCA include the percentage of plastic in MSW ( $C0$ ) and the percentage of that plastic that is rigid ( $C0a$ ), termed ‘dense plastic’ in WaCT. As these are only provided for household composition which we assume to be equivalent to MSW plastic composition. This is a reasonable approximation given that households usually produce the bulk of MSW generation (assumed as 70% wt. in WaCT as a default).

The primary inputs of formal collection of MSW for dry recycling (tC2i), formal collection of MSW for other recovery (tC2ii) and formal collection of MSW for incineration (tC2iii) are not directly reported by WaCT as they all fall within the tools aggregated category of ‘recovery facilities’. Despite this, an assessment of formal collection of MSW for incineration (tC2iii) can be made by analysing the recovery facility data available in the WaCT DCA and summing the mass input to any facility classified as incinerators, before dividing this by the collected mass to achieve the correct basis. This approach cannot be applied for formal collection for dry recycling (tC2i) or formal collection of MSW for other recovery (tC2ii) due to many of the sorting and recovery facilities including contributions from both formal and informal collections. As such, no data was extracted for these data points.

The SDG indicator 11.6.1, ‘the proportion of municipal solid waste collected and managed in controlled facilities out of total municipal waste generated, by cities’, is not a direct input to the MFA’s used in this work, but instead is an output calculated from the MFA’s. To ensure that the values of SDG 11.6.1 calculated in this work match those of the official WaCT tool, the values for managed in controlled facilities were also extracted from the WaCT DCA. These are subsequently used to override the predictions as calculated based on the MFAs in this work for municipalities having conducted WaCT analysis, thereby ensuring parity with the official statistics. No further harmonisation, screening, or correction of WaCT data was required.

#### **S.6.4.2 Wasteaware Benchmark Cities Indicators (WABI)**

The Wasteaware Cities Benchmark Indicators (WABI) were first developed as a means to compare cities waste management performance as part of the UN-Habitat flagship publication *Solid Waste Management in the World’s Cities*<sup>46</sup>, although not yet under the WABI name and documented by Wilson, et al.<sup>47</sup>. Later adaptations of the methodology saw the development of WABI as a complete framework and set of indicators to enable consistent solid waste data collection and reporting which would enable assessments and comparison of waste management systems around the world for their effectiveness at controlling waste, social inclusion in waste management and environmental sustainability<sup>38</sup>. Since its publication, the indicators have been used as a basis for over 70 studies, examples of which can be found in<sup>38,47-65</sup>.

WABI data used in this analysis is available from Velis, et al.<sup>40</sup>, with additional data sourced based on reports that used the WABI framework in China<sup>62</sup>, Egypt<sup>63</sup>, Ethiopia and South

Africa<sup>64</sup>. Wasteaware also provided supplementary information on case studies to aid in the analysis, particularly to ensure consistency across the different versions of the tool. Data years for the WABI dataset were assumed 3 years prior to the publication date of the data for each municipality as reported by Velis, et al.<sup>40</sup>. A data year for Ethiopian cities was only provided for Bishoftu, therefore it was assumed all other Ethiopian cities were profiled in the same year.

The MSW generation rate ( $tP1_{pc}$ ) was calculated from the above data by dividing the reported waste generation ( $t \cdot y^{-1}$ ), by the population provided in the dataset, and converting the units to  $kg \cdot cap^{-1} \cdot d^{-1}$ . Similarly, collection coverage ( $tC1$ ) and plastic in MSW ( $C0$ ) was reported as a percentage of MSW generation, therefore no further processing was necessary.

We assumed that the definition of controlled treatment and disposal facilities defined by indicator 2E used in the WABI<sup>38</sup> is equivalent to the definition of controlled disposal used in this analysis. Although this indicator relates to both treatment and disposal facilities, in practice the indicator is mainly used to describe disposal facilities only. Similarly, as the units of this indicator in WABI are as a percentage of waste destined for treatment or disposal, the units matched closely with that required for the controlled disposal input ( $tC3$ ), therefore no further processing was needed.

The *primary data inputs* of formal collection of MSW for dry recycling ( $tC2i$ ), formal collection of MSW for other recovery ( $tC2ii$ ) and formal collection of MSW for incineration ( $tC2iii$ ) are not directly reported as part of the WABI. Instead, the WABI reports a recycling rate that includes dry recycling by both formal and informal sectors, plus organics valorisation (e.g., composting, anaerobic digestion and animal feeding). Supplementary information associated with the WABI case studies<sup>40</sup> allowed many of the recycling data points to be disaggregated between the proportion that was reported as formal recycling compared to that which was informally collected. Though the informal sector is involved in recycling some wet wastes, it is predominantly focused on dry material, therefore, we assumed that all informal recycling reported in WABI was dry recycling. This enabled the WABI recycling rate to be adjusted so that it only included formal recycling, thereby becoming closer to that required by the *primary data inputs*. Importantly, informal recycling rates are included in our analysis, however, these are modelled and added on as part of the *secondary data inputs* (**Section S.7**). Lastly, to enable complete harmonisation with the *primary data inputs* of formal recycling ( $tC2i$ ) and other recovery ( $tC2ii$ ), the formal recycling rate was split into the proportion that is related to dry recycling, and the proportion sent for organics valorisation ('other recovery'). As this was not explicitly recorded for many records in the WABI dataset, we obtained evidence from literature for each municipality to estimate this split (**Table S8**).

**Table S8.** Review of evidence for municipalities in the Wasteaware Cities Benchmark Indicators (WABI) dataset with reported formal recycling with the aim to understand the split between formal dry recycling and other recovery.

| Municipality | Country   | Proportion of WABI formal recycling that is dry recycling | Justification                                                                                                                                                                          | Source |
|--------------|-----------|-----------------------------------------------------------|----------------------------------------------------------------------------------------------------------------------------------------------------------------------------------------|--------|
| Adelaide     | Australia | 77.5%                                                     | 62% dry recycling and 18% composting reported as a percentage of waste generation                                                                                                      | 66     |
| Varna        | Bulgaria  | 100%                                                      | Evidence of a recycling facility in Varna processing household waste for recycling but no mention of any other recovery facility type, therefore allocated completely to dry recycling | 67     |

| Municipality    | Country          | Proportion of WABI formal recycling that is dry recycling | Justification                                                                                                                                                                                                                                                                                                                                                                                                 | Source |
|-----------------|------------------|-----------------------------------------------------------|---------------------------------------------------------------------------------------------------------------------------------------------------------------------------------------------------------------------------------------------------------------------------------------------------------------------------------------------------------------------------------------------------------------|--------|
| Bahrain         | Bahrain          | 100%                                                      | Although the reference suggest both dry recycling and composting facility exist, the latter is reported to have negligible flows. As such, dry recycling is assumed to represent the entire amount of the WABI recycling value.                                                                                                                                                                               | 68     |
| Belo Horizonte  | Brazil           | 100%                                                      | Evidence of formal cooperative waste pickers working alongside informal waste pickers. No evidence of other recovery such as composting so all assigned to dry recycling.                                                                                                                                                                                                                                     | 69     |
| Victoria-Gastez | Spain            | 100%                                                      | Paper, plastics and glass reportedly recycled. No evidence of composting, therefore all recycling assigned to dry recycling.                                                                                                                                                                                                                                                                                  | 70     |
| Rotterdam       | Netherlands      | 57.7%                                                     | Based on 15% composting and 11% dry recycling in South Holland                                                                                                                                                                                                                                                                                                                                                | 71     |
| Belfast         | Northern Ireland | 59.1%                                                     | 15.9% dry recycling and 11% composting                                                                                                                                                                                                                                                                                                                                                                        | 72     |
| Athens          | Greece           | 99.6%                                                     | 99.6% dry recycling with only 0.4% composting of restaurant waste                                                                                                                                                                                                                                                                                                                                             | 73     |
| Delhi           | India            | 0%                                                        | Dry recycling reportedly performed largely by the informal sector. NGO's encouraged to perform composting, therefore all formal recycling allocated to composting.                                                                                                                                                                                                                                            | 74     |
| Dhaka           | Bangladesh       | 0%                                                        | Evidence of a composting plant in operation along with collection services for market waste                                                                                                                                                                                                                                                                                                                   | 46     |
| Castries        | St Lucia         | 2.5%                                                      | Evidence of some formal dry recycling facilities present in Castries therefore it is plausible that the 2.5% is formal                                                                                                                                                                                                                                                                                        | 75     |
| Singapore       | Singapore        | 81.4%                                                     | Approximated from a chart – Singapore includes several non-municipal sources so the reported rate of 59% was adjusted by deducting construction waste (29%) and slag (8.5%) – leaving 21.5%. Of this, the combined proportion of horticultural waste and food waste was 4%; assumed composted or sent for anaerobic digestion. This means the formal dry recycling rate was 81.4% of all formal MSW recycling | 76     |
| Curepipe        | Mauritius        | -                                                         | Evidence that although some collection of dry recyclables occurs by the formal sector, this is mixed together with residual waste at the transfer station and taken to disposal sites, therefore omitted.                                                                                                                                                                                                     | 46     |
| Canete          | Peru             | 100%                                                      | Separate collection of inorganic recyclables available in about 15% of the municipality.                                                                                                                                                                                                                                                                                                                      | 46     |
| Jakarta         | Indonesia        | -                                                         | Unable to source reliable data to justify the 5% reported, however both waste banks and compost facilities are reported to exist. Therefore omitted.                                                                                                                                                                                                                                                          | 77     |
| Ghorahi         | Nepal            | 100%                                                      | A small amount of plastics are sorted for recycling formally at the landfill site. Although compost pits are also present at the landfill site, it is reported they have difficulty selling this due to glass contamination. As such, the dry recycling is assumed the dominant part of formal recycling.                                                                                                     | 46     |
| Quezon City     | Philippines      | -                                                         | Formal <i>barangay</i> collectors are reported to have material recovery facilities for dry recycling but also collect biodegradable waste for composting. It is unclear of the relative split between these activities, therefore an equal split is assumed.                                                                                                                                                 | 46     |
| Managua         | Nicaragua        | 100%                                                      | Believed to be due to waste picker cooperatives therefore assigned to dry recycling                                                                                                                                                                                                                                                                                                                           | 46     |
| Lusaka          | Zambia           | 100%                                                      | Reported there is a strong formal sector with five recycling companies collection paper, plastics and metal.                                                                                                                                                                                                                                                                                                  | 46     |
| Surat           | India            | -                                                         | Unable to source reliable data therefore omitted                                                                                                                                                                                                                                                                                                                                                              |        |
| Bangalore       | India            | -                                                         | Unable to source reliable data therefore omitted                                                                                                                                                                                                                                                                                                                                                              |        |
| Warangal        | India            | -                                                         | Unable to source reliable data therefore omitted                                                                                                                                                                                                                                                                                                                                                              |        |

| Municipality    | Country    | Proportion of WABI formal recycling that is dry recycling | Justification                                                                                                                                                                                                                 | Source |
|-----------------|------------|-----------------------------------------------------------|-------------------------------------------------------------------------------------------------------------------------------------------------------------------------------------------------------------------------------|--------|
| Bishkek         | Kyrgyzstan | 93.75%                                                    | Material flow analysis suggest 500 tonnes per year are composted formally, whereas 7500 tonnes per year of paper goes to recycling factories directly (assumed formal). Therefore 93.75% of formal recycling is dry recycling | 78     |
| Lahore          | Pakistan   | 0%                                                        | All formal recycling is composting                                                                                                                                                                                            | 79     |
| Castries        | St Lucia   | 100%                                                      | Dry recyclables reportedly collected. No evidence of composting or other recovery                                                                                                                                             | 75     |
| San Francisco   | USA        | 72.2%                                                     | 72.2% dry recycling with the remainder composting                                                                                                                                                                             | 80     |
| Tompkins county | USA        | 100%                                                      | Evidence of material recovery facilities and mixed dry recyclables collection at source but no mention of other recovery facilities.                                                                                          | 81     |

Abbreviations: Municipal solid waste (MSW); non-governmental organisation (NGO); WasteAware Benchmark Indicators (WABI).

The splits found in **Table S8** were used to disaggregate the WABI formal recycling rate by dry recycling and other recovery. As the units of the WABI recycling rate are as a percentage of waste generation, the values were further divided by the reported collection coverage to convert the units to a percentage of collected waste, thereby matching those required for tC2i and tC2ii.

Lastly, incineration is not directly reported as part of the WABI dataset. To populate the primary data input of ‘collected for incineration’ (tC2iii), we gathered evidence to determine whether incineration was taking place in each municipality. The municipalities in which incineration was found to occur is shown in **Table S9**.

**Table S9.** Amount of waste incinerated in municipalities profiled using the WABI method.

| Municipality       | Country     | Mass incinerated (t·y <sup>-1</sup> ) | Proportion MSW incinerated (% of MSW generation) | Source |
|--------------------|-------------|---------------------------------------|--------------------------------------------------|--------|
| Kunming            | China       | 1,382,368                             | 73                                               | 33     |
| Bengbu             | China       | 369,619                               | 73                                               |        |
| Lanzhou (Lan'Zhou) | China       | 870,459                               | 100                                              |        |
| Suzhou             | China       | 1,898,138                             | 77                                               |        |
| Taian (Tai'an)     | China       | 413,755                               | 64                                               |        |
| Xian (Xi'an)       | China       | 140,750                               | 94                                               | 46     |
| Rotterdam          | Netherlands |                                       | 76.23 <sup>a</sup>                               |        |
| Singapore          | Singapore   |                                       | 38                                               |        |

<sup>a</sup> based on the statement that all residual waste is incinerated with only 1% of residues sent to landfill and 23% recycling, anaerobic digestion and composting reported in the WABI dataset Abbreviations: municipal solid waste (MSW).

In all cases, collection coverage reported for municipalities which incinerate waste was 100%, therefore, the units of percentage of MSW generation are equivalent to the units of percentage of MSW collected. As such, no further processing was required and the values in **Table S9** were used directly as input tC2iii.

#### S.6.4.3 What a Waste 2.0 (WaW2.0)

The What a Waste 2.0 dataset provided by Kaza, et al.<sup>30</sup> reported waste data collected from 367 cities covering nearly every country. Data were obtained by Kaza, et al.<sup>30</sup> from literature and

conversations with waste agencies and authorities. Data sources in WaW2.0 are listed in the ‘City level codebook’ that accompanied the report.

#### ***S.6.4.3.1 Collection coverage***

The WaW2.0 dataset includes four fields which are used to report collection coverage using different units. For some cities no data are reported in any field, others just one field and others two, three, or four. We assumed they were all equivalent estimates to collection coverage as a percentage of MSW generation by mass (tC1), and selected them for inclusion in our dataset according to the following order of the following preference:

1. % wt. of waste
2. % of population
3. % of households
4. % of geographical area

#### ***S.6.4.3.2 MSW generation rate***

The amount of MSW generated in each municipality is reported by WaW2.0 in  $\text{t} \cdot \text{y}^{-1}$ . We divided these rates by the population reported in the dataset itself and then multiplied by  $(1000/365)$  to adjust the units to  $\text{kg} \cdot \text{cap}^{-1} \cdot \text{d}^{-1}$ .

Approximately 30% of the waste generation entries also report whether scales are used to weigh the mass of waste collected, and the location at which it was measured. For example, of the 100 cities that reported the measurement method, 69 reported scales were used at the point of disposal, five at the point of aggregation (e.g., transfer stations), 16 did not have a measurement method, and ten reported ‘other’. It was assumed that the MSW generation rates were based on measurements taken from these weighbridges when provided. This implies that many of the reported waste generation rates represent collected waste only. Therefore, if collection coverage is less than 100%, the total MSW generation rate has been underreported.

There is evidence that some municipalities and countries may correct their waste generation data on the basis of waste collection and other factors, for instance for some municipalities in Brazil<sup>82</sup>. There is also some evidence that waste generation is reported as that which has been ‘collected and transported’, for instance by National Bureau of Statistics of China<sup>83</sup>. Without checking each individual record by either re-requesting the information from the municipality or following up the published source, it was not possible to determine whether the data had already been corrected. Moreover, for most records ( $n = 267$ ) in the WaW2.0 city database, the point of measurement was left blank, creating uncertainty over where the waste was measured and also whether it was corrected.

To address the potential underestimation of waste generation rates, we carried out a cautious adjustment by dividing the waste generation rate by the collection coverage. For cities in high-income countries (HICs), the difference between the reported and adjusted waste generation was negligible because most cities in HICs reported collection coverage at or close to 100%. For cities in upper-middle income countries (UMCs), lower-middle income countries (LMCs) and low income countries (LICs), the difference between the adjusted waste generation rate and the original waste generation rate was progressively greater as the collection coverage negatively correlated with income category, a commonly observed trend<sup>5,30</sup>.

Analysis of the central tendency and spread of the adjusted waste generation data showed that for some records, cities in UMCs, LMCs and LICs generated substantially more waste than in many HIC municipalities (**Table S10**). Whilst parts of some wealthier cities in the Global South may approach comparability with some poorer cities in HICs, we assumed that it is unlikely that the median waste generation would exceed that in HICs. Therefore, to control for potentially overestimated waste generation rates, we screened the adjusted waste generation data to assess the plausibility of our corrections according to the following criteria:

- Adjusted waste generation rates for cities in LIC and LMC countries that were greater than the median waste generation mass for HICs ( $1.02 \text{ kg} \cdot \text{cap}^{-1} \cdot \text{d}^{-1}$ ;  $n = 60$ ) were assumed to be overcorrected and flagged for potential reversion to the original reported figure.
- Adjusted waste generation rates for cities in UMC and HICs that exceeded 1.5 times the interquartile range from the 75<sup>th</sup> percentile<sup>84</sup> were assumed to be outliers ( $n = 5$ ) and flagged for potential reversion to the original reported figure.

Cities flagged for a potential correction were screened to identify plausible explanations for a high waste generation, for instance, for extremely high tourism. Three cities: Hanoi (Vietnam), San Pedro (Belize) and Honiara (Solomon Islands) were identified as being major tourist destinations. For each of these three, tourist arrivals statistics were compared with the resident population to see if there was a substantial inferred increase in population for long enough to affect the waste generation mass. In each case, we decided that the increase was not great enough to warrant the increase. Therefore, all the flagged records were reverted ( $n = 65$ ), reducing the spread of the data.

**Table S10.** Side by side comparison of central tendency and spread for waste generation mass reported in the WAW2.0 dataset<sup>30</sup> compared to mass adjusted by collection coverage ( $\text{kg} \cdot \text{cap}^{-1} \cdot \text{d}^{-1}$ ).

| Dataset                | Central tendency and spread | LIC  | LMC  | UMC  | HIC  |
|------------------------|-----------------------------|------|------|------|------|
| Original data          | 25 <sup>th</sup> percentile | 0.27 | 0.43 | 0.66 | 0.65 |
|                        | Median                      | 0.48 | 0.58 | 1.01 | 1.01 |
|                        | 75 <sup>th</sup> percentile | 0.70 | 0.85 | 1.26 | 1.41 |
|                        | Inter quartile range        | 0.43 | 0.42 | 0.59 | 0.76 |
| Adjusted ('corrected') | 25 <sup>th</sup> percentile | 0.34 | 0.47 | 0.74 | 0.66 |
|                        | Median                      | 0.67 | 0.75 | 1.06 | 1.02 |
|                        | 75 <sup>th</sup> percentile | 1.37 | 1.32 | 1.38 | 1.41 |
|                        | Inter quartile range        | 1.03 | 0.85 | 0.65 | 0.75 |

As shown in **Table S11**, the 75<sup>th</sup> percentile for cities in LICs and LMCs of adjusted waste generation rate with the 65 outliers removed reduced substantially, whereas the data for UMCs and HICs were barely affected.

**Table S11.** Central tendency and spread of waste generation mass reported in the WAW2.0 dataset<sup>30</sup>, adjusted by collection coverage with the adjustment reverted for some records to control outliers.

| Dataset                                  | Central tendency and spread | LIC  | LMC  | UMC  | HIC  |
|------------------------------------------|-----------------------------|------|------|------|------|
| Corrected with some corrections reverted | 25 <sup>th</sup> percentile | 0.34 | 0.46 | 0.70 | 0.66 |
|                                          | Median                      | 0.55 | 0.64 | 1.06 | 1.02 |
|                                          | 75 <sup>th</sup> percentile | 0.75 | 0.88 | 1.34 | 1.41 |

| Dataset | Central tendency and spread | LIC  | LMC  | UMC  | HIC  |
|---------|-----------------------------|------|------|------|------|
|         | Inter quartile range        | 0.41 | 0.43 | 0.64 | 0.75 |

#### S.6.4.3.3 *Plastic in MSW*

The composition of MSW is reported in WaW2.0, including a category for plastics. If the summation of the compositions did not equal 100%, values were normalised then assigned to ‘plastic in MSW’ (C0).

#### S.6.4.3.4 *Recovery and controlled disposal*

The proportion of waste that was treated and disposed of is reported in WaW2.0 under 12 categories for 247 cities. Although the questionnaire used by WaW2.0 stated that respondents should report these categories as a proportion of waste generation, we assumed that, for the majority of cases, it was reported as a proportion of ‘formally collected waste’. Our assumption is further supported by the fact that 59 cities reported informal recycling rates (as a percentage of waste generation), yet only six of these cities ensured that the summation of this informal recycling with the formal treatment and disposal options equaled 100%. By contrast, most of the cities with data on informal recycling reported that the other 12 treatment and disposal options summed to 100% (n = 32), whilst the remainder (n = 21) summed to less than 100%. Examples such as this indicated inconsistencies and errors, which fell into four main groups:

1. In approximately half of cases, the ‘unaccounted for’ category appeared to represent ‘uncollected waste’ rather than material collected and transported. This implies that some municipalities had followed the instructions and reported proportions as a percentages of waste generation, whilst the other half had used it to represent collected waste for which the data to describe the treatment and disposal pathway was not known.
2. Data for informal sector recycling were reported as a proportion of waste generation (n = 59), yet when combined with the 12 other treatment and disposal options, the majority (n = 53) did not sum to 100%.
3. Only recycling was reported (n = 5) and the other categories were left blank.
4. The sum of categories added up to more or less than 100% (n = 50).

To approximately correct the inconsistent use of the ‘unaccounted for’ field (1), we assumed that if the sum of ‘unaccounted for’, ‘waterways marine’ and ‘collection coverage’ fields were within 10 percentage points of 100%, then the ‘unaccounted for’ field represented ‘uncollected waste’ (n = 65). In all other cases we assumed that the ‘unaccounted for’ field represented collected and transported waste that had been deposited in an unknown, uncontrolled facility (n = 302).

If data for informal recycling sector collection (2) was within 10% of the reported ‘waste\_treatment\_recycling\_percent’ field, it was assumed both fields represent informal recycling and therefore the data point was removed from the analysis (informal sector recycling was instead estimated using a modeling approach to ensure more consistent estimations).

Where only the ‘recycling’ field was reported (3), data were left intact, and the other categories were left blank exactly as entered. Where the sum of the proportions was less than or greater than 100% (4), we normalised each of the reported categories to 100%. If the summation of the

treatment and disposal options prior to normalisation summed to 100%, but some of the inputs were left blank, it was assumed that no other treatment and disposal methods were present in that municipality. The blank treatment and disposal options were therefore allocated zeros instead of blanks. If the pre-normalised values did not sum to 100% the blanks were unchanged.

Each of the treatment and disposal types in WaW2.0 were assigned *primary data variables* according to The World Bank<sup>85</sup> country income category of the municipality (**Table S12**). The *primary data inputs* for formal collection for dry recycling (tC2i) and incineration (tC2iii) each relate to only a single WaW2.0 category, therefore the proportions reported were used following the above corrections. Other recovery (tC2ii) was calculated as the sum of the proportions allocated to the ‘composting’, ‘anaerobic digestion’ and ‘advanced thermal treatment’ WaW2.0 categories. As the units for these were assumed as a percentage of collected waste, no further processing was required. By contrast, the *primary data input* variable of ‘controlled disposal’ (tC3) is a proportion of waste collected for disposal, therefore this input was calculated as the sum of the percentages assigned as controlled disposal, divided by all percentages assigned to disposal.

**Table S12.** Classification of municipal solid waste treatment and disposal categories reported in What a Waste 2.0 (WaW2.0)<sup>30</sup> by country income categories.

| WaW2.0 treatment and disposal categories | Classification assigned in this work by income category of country |                                            |
|------------------------------------------|--------------------------------------------------------------------|--------------------------------------------|
|                                          | HIC                                                                | UMC, LMC, LIC                              |
| Recycling                                | Formal collection for dry recycling (tC2i)                         | Formal collection for dry recycling (tC2i) |
| Compost                                  | Other recovery (tC2ii)                                             | Other recovery (tC2ii)                     |
| Anaerobic digestion                      | Other recovery (tC2ii)                                             | Other recovery (tC2ii)                     |
| Advanced thermal treatment               | Other recovery (tC2ii)                                             | Other recovery (tC2ii)                     |
| Incineration                             | Incineration (tC2iii)                                              | Incineration (tC2iii)                      |
| Landfill gas system                      | Controlled disposal (tC3)                                          | Controlled disposal (tC3)                  |
| Controlled landfill                      | Controlled disposal (tC3)                                          | Controlled disposal (tC3)                  |
| Landfill unspecified                     | Controlled disposal (tC3)                                          | Uncontrolled disposal                      |
| Open dump                                | Uncontrolled disposal                                              | Uncontrolled disposal                      |
| Other                                    | Controlled disposal (tC3)                                          | Uncontrolled disposal                      |
| Marine / river                           | Uncontrolled disposal                                              | Uncontrolled disposal                      |
| Unaccounted <sup>1</sup>                 | Uncontrolled disposal or uncollected                               | Uncontrolled disposal or uncollected       |

<sup>1</sup>Analysis of the City Dataset reported in WaW2.0<sup>30</sup> indicates confusion amongst some of the respondents to the survey.

In approximately half of the cases, it appears that the ‘unaccounted for’ field was used to represent ‘uncollected waste’, whereas in the other half of cases it was used to represent collected waste for which the data to describe the treatment and disposal pathway was not known. To correct these inconsistencies, we assume that if the sum of ‘unaccounted for’ and ‘collected’ waste is within 10 percentage points of 100%, then the ‘unaccounted for’ field represents uncollected waste. In all other cases, we assume that the ‘unaccounted for’ field represents collected waste that has been deposited in an uncontrolled facility. Abbreviations: high-income country (HIC); upper-middle income country (UMC); lower-middle income country (LMC); low-income country (LIC); What a Waste 2.0 (WaW2.0).

#### **S.6.4.3.5 Formal dry recycling**

On the basis that anaerobic digestion and composting are reported separately in WaW2.0<sup>30</sup>, it was assumed that the recycling rate reported is for dry recycling only.

While anaerobic digestion and particularly composting have become more common in LICs, LMCs and UMCs<sup>30</sup>, collection of dry recyclate by the formal sector is uncommon or small in



comparison to the informal sector<sup>86</sup>. As we will show in this section, this is except for some cities in UMCs that have begun to implement small-scale formal recycling collection systems. Thus, the majority of WaW2.0 records for cities in LICs, LMCs and UMCs that included data for ‘recycling’ are likely to represent waste collected by the informal sector rather than by the formal sector. We suggest that this may even be the case for the cities where the informal sector recycling field was left blank due to insufficiently defined reporting between the formal and informal sector activities, making disaggregation challenging.

To assess whether the recycling rate in WaW2.0 represents formal collection for recycling, the following assumptions and data verification steps were conducted:

1. Recycling rates reported for cities in HICs were assumed to describe formal collection for dry recycling collection as a proportion of waste collection.
2. Recycling rates reported for cities in LICs and LMCs were assumed to describe informal recycling sector dry recycling collection as a proportion of waste collection. In these cases, formal collection for dry recycling was marked as zero.
3. For cities in UMCs, evidence was collated from municipal websites, reports, and academic articles to determine whether formal collection for dry recycling was being carried out in the municipality (**Table S13**). This consisted of three tests:
  - a. Is there evidence that the formal sector recycling is taking place in the municipality?
  - b. Is the recycling rate reported so high that it is implausible that it is entirely carried out by the formal sector?
  - c. Is the recycling rate low enough that it is implausible that it only represents informal collection and is therefore more likely to represent a small formal operation?

Records marked as ‘plausible’ were assumed to be representative of formal recycling; ‘unlikely’ were assumed to represent informal recycling and marked with a zero; and ‘uncertain’ data points, where it was unclear what the data represented, were removed.

**Table S13.** Evidence that formal recycling takes places in the municipalities reported by What a Waste 2.0<sup>30</sup>.

| Municipality                    | Country   | Reported recycling rate (% of collected waste) <sup>1</sup> | Plausibility that recycling rate is formal | Reason                                                                  | Ref           |
|---------------------------------|-----------|-------------------------------------------------------------|--------------------------------------------|-------------------------------------------------------------------------|---------------|
| Vlora                           | Albania   | 10                                                          | Unlikely                                   | Thriving informal sector and no evidence of formal sector recycling     | <sup>87</sup> |
| Algiers                         | Algeria   | 10                                                          | Unlikely                                   | No evidence of formal recycling and evidence of strong informal sector  | <sup>88</sup> |
| Cordoba                         | Argentina | 0.68                                                        | Plausible                                  | Recycling rate low and evidence that formal recycling takes place       | <sup>89</sup> |
| Ciudad Autónoma De Buenos Aires | Argentina | 7.2                                                         | Unlikely                                   | Thriving informal sector and little evidence of formal sector recycling | <sup>89</sup> |

| Municipality               | Country            | Reported recycling rate (% of collected waste) <sup>1</sup> | Plausibility that recycling rate is formal | Reason                                                                                                                                                                                                      | Ref     |
|----------------------------|--------------------|-------------------------------------------------------------|--------------------------------------------|-------------------------------------------------------------------------------------------------------------------------------------------------------------------------------------------------------------|---------|
| Grodno                     | Belarus            | 0.6                                                         | Plausible                                  | Recycling rate low and evidence that formal recycling takes place                                                                                                                                           | 90      |
| Distrito Federal, Brasilia | Brazil             | 5.94                                                        | Unlikely                                   | Thriving informal sector and little evidence of formal sector recycling                                                                                                                                     | 91      |
| Rio De Janeiro             | Brazil             | 0.5                                                         | Plausible                                  | Recycling rate low and some small evidence that formal recycling takes place                                                                                                                                | 92      |
| Bogota                     | Colombia           | 17                                                          | Plausible                                  | Evidence that informal sector has become fully formalised                                                                                                                                                   | 93,94   |
| Medellin                   | Colombia           | 16                                                          | Plausible                                  | Evidence that informal sector has become fully formalised                                                                                                                                                   | 95      |
| Cali                       | Colombia           | 15                                                          | Plausible                                  | Evidence that informal sector has become fully formalised                                                                                                                                                   | 96      |
| San Jose                   | Costa Rica         | 5.2                                                         | Plausible                                  | Some evidence that formal recycling takes place                                                                                                                                                             | 97,98   |
| Alajuela                   | Costa Rica         | 0.42                                                        | Plausible                                  | Recycling rate low and some small evidence that formal recycling takes place                                                                                                                                | 97,98   |
| Quito                      | Ecuador            | 6                                                           | Unlikely                                   | No evidence of formal recycling and evidence of strong informal sector                                                                                                                                      | 99,100  |
| Guatemala City             | Guatemala          | 5                                                           | Unlikely                                   | No evidence of formal recycling and evidence of strong informal sector                                                                                                                                      | 101     |
| Tehran                     | Iran, Islamic Rep. | 4                                                           | Plausible                                  | Evidence of formal recycling                                                                                                                                                                                | 102     |
| Beirut                     | Lebanon            | 5                                                           | Unlikely                                   | No evidence of formal recycling and evidence of strong informal sector                                                                                                                                      | 103     |
| Saida                      | Lebanon            | 20                                                          | Plausible                                  | Evidence of formal recycling                                                                                                                                                                                | 104     |
| Skopje                     | Macedonia, FYR     | 3                                                           | Unlikely                                   | No evidence of formal recycling and evidence of strong informal sector                                                                                                                                      | 73,105  |
| Kuala Lumpur               | Malaysia           | 10.4                                                        | Plausible                                  | Evidence of formal recycling                                                                                                                                                                                | 106     |
| Mexico City                | Mexico             | 14.19                                                       | Plausible                                  | Potentially plausible, but recycling rate is perhaps too high to be carried out formally for a UMC. However, as references claim that IRS is prohibited in Mexico City, it was therefore assumed plausible) | 65,97   |
| Guadalajara                | Mexico             | 8                                                           | Unlikely                                   | Evidence that it is informal recycling                                                                                                                                                                      | 107     |
| Cusco                      | Peru               | 0.3                                                         | Plausible                                  | Recycling rate low and evidence that formal recycling takes place                                                                                                                                           | 99      |
| Cluj-Napoca                | Romania            | 13.72                                                       | Uncertain                                  | Evidence for formal recycling is very weak and slightly stronger evidence of a thriving informal sector. Uncertain that such a high recycling rate would be entirely from formal recycling in an UMC        | 108     |
| Bucharest                  | Romania            | 9.44                                                        | Plausible                                  | Evidence for a strong formal sector recycling effort                                                                                                                                                        | 73,109  |
| Moscow                     | Russian Federation | 4                                                           | Unlikely                                   | Evidence for a strong formal sector recycling effort                                                                                                                                                        | 110     |
| St. Petersburg             | Russian Federation | 10                                                          | Unlikely                                   | Evidence of some small scale formal recycling initiatives such as bring sites                                                                                                                               | 111,112 |
| Kemerovo                   | Russian Federation | 1.9                                                         | Plausible                                  | Evidence for a strong formal sector recycling effort                                                                                                                                                        | 113     |
| Novi Sad                   | Serbia             | 2                                                           | Unlikely                                   | Evidence that formal recycling is around 0.4% so 2% is assumed too high                                                                                                                                     | 114     |
| Bangkok                    | Thailand           | 11.85                                                       | Unlikely                                   | Strong evidence for informal sector and recycling rate likely too high for a UMC                                                                                                                            | 115     |

| Municipality | Country       | Reported recycling rate (% of collected waste) <sup>1</sup> | Plausibility that recycling rate is formal | Reason                                                                                                                                                                  | Ref            |
|--------------|---------------|-------------------------------------------------------------|--------------------------------------------|-------------------------------------------------------------------------------------------------------------------------------------------------------------------------|----------------|
| Vavau        | Tonga         | 5.1                                                         | Plausible                                  | Strong evidence for formal recycling system                                                                                                                             | <sup>116</sup> |
| Sakarya Mm   | Turkey        | 2.49                                                        | Plausible                                  | Evidence for formal recycling system in place                                                                                                                           | <sup>117</sup> |
| Caracas      | Venezuela, RB | 0.9                                                         | Plausible                                  | According to source, recycling is the 'responsibility' of the municipality but seems to be limited in scope and coverage –therefore such a small amount seems plausible | <sup>118</sup> |

<sup>1</sup> Although recycling rates were supposedly reported as a percentage of waste generation, it is assumed that most municipalities reported their recycling rates as a percentage of collected waste for reasons previously discussed.

#### S.6.4.3.6 Incineration

Data reported in WaW2.0 dataset under the 'incineration' category were sense checked for plausibility using several databases and other sources<sup>119</sup> listed in **Table S14**. Where incinerators with sufficient capacity to process the amounts likely to be generated in a city existed near the municipality, we considered them plausible. In two cases (Angers-Loire Metropole and Trnava), no incinerator was close-by, however the proportions reported were very small, so it was plausible that small amounts or, perhaps, hazardous waste were being transported to incinerators which were in nearby municipalities. Therefore, it was considered plausible that the amounts stated were being incinerated.

**Table S14.** Evidence that incineration takes places in municipalities reported by What a Waste 2.0<sup>30</sup>.

| Municipality Name      | Country Name | Data Year | Incineration rate | Plausibility of incineration | Justification                                                                                                                                                                                                                           | Reference      |
|------------------------|--------------|-----------|-------------------|------------------------------|-----------------------------------------------------------------------------------------------------------------------------------------------------------------------------------------------------------------------------------------|----------------|
| Baku                   | Azerbaijan   | 2013      | 39.97             | Plausible                    | Baku waste to energy plant installed 2012 cap 550,000 t·y <sup>-1</sup>                                                                                                                                                                 | <sup>119</sup> |
| Liege                  | Belgium      | 2014      | 26.00             | Plausible                    | Intradel Herstal plant installed 2009 cap 320,000 t·y <sup>-1</sup>                                                                                                                                                                     | (98)           |
| Beijing                | China        | 2015      | 8.00              | Plausible                    | Incineration in 2019 was 54% <sup>33</sup> , and although it does not go back to 2015, 8% is commensurate with the general increase in Incineration over the past decade <sup>120</sup> .                                               | <sup>33</sup>  |
| Paris                  | France       | 2015      | 77.50             | Plausible                    | Eight MSW incinerators located in Paris                                                                                                                                                                                                 | <sup>119</sup> |
| Angers-Loire Metropole | France       | 2015      | 0.23              | Plausible                    | Incinerators at Nates and Chinon, far but within reasonable proximity to process such a very small amount of waste                                                                                                                      | <sup>119</sup> |
| Berlin                 | Germany      | 2015      | 65.00             | Plausible                    | Incinerator with 3.6 M t·y <sup>-1</sup> capacity since 1967                                                                                                                                                                            | <sup>119</sup> |
| Budapest               | Hungary      | 2014      | 52.00             | Plausible                    | Hulladékhasznosító Mű (HHM) has 17 Mt capacity since 2005                                                                                                                                                                               | <sup>119</sup> |
| Delhi                  | India        | 2014      | 52.04             | Unlikely                     | Delhi has one incinerator operational since 2011 with 225,000 t·y <sup>-1</sup> , so it cannot be plausible that it has treated half the waste in the city in 2014. At least one is functional since, but it was not ready at the time. | <sup>119</sup> |
| Kanpur                 | India        | 2016      | 42.86             | Unlikely                     | No record found of an incinerator here                                                                                                                                                                                                  | <sup>119</sup> |

| Municipality Name | Country Name             | Data Year | Incineration rate | Plausibility of incineration | Justification                                                                                                             | Reference      |
|-------------------|--------------------------|-----------|-------------------|------------------------------|---------------------------------------------------------------------------------------------------------------------------|----------------|
| Tehran            | Islamic Republic of Iran | 2014      | 2.50              | Unlikely                     | No record found of an incinerator here                                                                                    | <sup>119</sup> |
| Milano            | Italy                    | 2015      | 43.47             | Plausible                    | Incinerator with 1.4 Mt·y <sup>-1</sup> capacity reported here                                                            | <sup>119</sup> |
| Osaka             | Japan                    | 2015      | 78.07             | Plausible                    | Nine incinerators reported to be operational in the municipality                                                          | <sup>119</sup> |
| Kobe              | Japan                    | 2015      | 72.60             | Plausible                    | Five incinerators reported to be operational in the municipality                                                          | <sup>119</sup> |
| Naha              | Japan                    | 2015      | 81.50             | Plausible                    | Clean Center Naha Haeburu incinerator operational since 2006 170,00 t·y <sup>-1</sup>                                     | <sup>119</sup> |
| Toyama            | Japan                    | 2015      | 68.21             | Plausible                    | Clean Center Toyama incinerator 270,000 t·y <sup>-1</sup> operational since 2003                                          | <sup>119</sup> |
| Kitakyushu        | Japan                    | 2015      | 64.92             | Plausible                    | Three incinerators operational in the municipality                                                                        | <sup>119</sup> |
| Yokohama          | Japan                    | 2015      | 65.55             | Plausible                    | Four incinerators operational in the municipality                                                                         | <sup>119</sup> |
| Seoul             | Korea, Rep.              | 2012      | 8.00              | Plausible                    | Five incinerators operational in the municipality                                                                         | <sup>119</sup> |
| Oslo              | Norway                   | 2013      | 57.85             | Plausible                    | Two incinerators operational in the municipality                                                                          | <sup>119</sup> |
| Bergen            | Norway                   | 2014      | 39.10             | Plausible                    | BIR Avfallsenergi AS incinerator operational since 1999 and upgraded in 2010                                              | <sup>119</sup> |
| Lahore            | Pakistan                 | 2017      | 6.15              | Unlikely                     | No record found of an incinerator here                                                                                    | <sup>119</sup> |
| Trnava            | Slovak Republic          | 2010      | 0.34              | Plausible                    | Proximity to Bratislava which has an incinerator suggests that such a small quantity could be plausibly transported there | <sup>119</sup> |
| Bratislava        | Slovak Republic          | 2013      | 41.02             | Plausible                    | Incinerator with 135,000 t·y <sup>-1</sup> capacity reported here                                                         | <sup>119</sup> |
| Madrid            | Spain                    | 2014      | 10.00             | Plausible                    | Incinerator with 314,000 t·y <sup>-1</sup> capacity reported here                                                         | <sup>119</sup> |
| Stockholm         | Sweden                   | 2013      | 71.01             | Plausible                    | Incinerator with 700,000 t·y <sup>-1</sup> capacity reported here                                                         | <sup>119</sup> |
| Boras             | Sweden                   |           | 54.62             | Plausible                    | Incinerator with 109,000 t·y <sup>-1</sup> capacity reported here                                                         | <sup>119</sup> |
| Kiev              | Ukraine                  | 2016      | 24.57             | Plausible                    | Incinerator with 450,000 t·y <sup>-1</sup> capacity reported here since 1988                                              | <sup>119</sup> |
| London            | United Kingdom           | 2012      | 46.34             | Plausible                    | At least one incinerator and several fuel producing MBT plants reported here during the timescale                         | <sup>119</sup> |
| Hanoi             | Vietnam                  | 2014      | 6.59              | Unlikely                     | Nam Son solid waste treatment complex (SWTC) incinerator has 100,000 t·y <sup>-1</sup> capacity reported here             | <sup>119</sup> |

Abbreviations: Million tonnes (Mt); mechanical biological treatment (MBT); municipal solid waste (MSW).

#### S.6.4.3.7 Data Year

The years that data were collected for WaW2.0 records were recorded by the World Bank in a downloadable ‘city level codebook’<sup>121</sup>. Years were provided for both the population and the year of waste generation; however, the other data points were not assigned a data year. Here, we assumed the data year for the waste generation also applies to all other waste data points of that record, albeit we acknowledge there is uncertainty in this assumption. When the year of waste

generation was not available, the data year was left blank, but the records were retained in the analysis to maximise the number of data points.

#### **S.6.4.4     UNSD City Waste Data**

Municipal solid waste management data<sup>32</sup> was provided by the United Nations Statistical Division (UNSD) on the 23<sup>rd</sup> April 2021.

The data forms part of the UNSD Environmental Indicators database, populated by national statistic offices and ministries of environment and collected by means of a biennial questionnaire<sup>39</sup>. The raw data includes information for 237 cities across the World for multiple years spanning from 1989 to 2019; however, not all cities submit complete records for all years. According to their operation protocols, data are accepted by UNSD without further adjustment aside from basic data coherence checks (e.g., percentages sum to 100%). As such, some data entries appear to have been erroneously entered by respondents necessitating thorough cleaning, as described in this section.

##### ***S.6.4.4.1   Waste generation rate***

The municipal waste generation rate of a municipality was calculated using three different methods, prioritised in the following order:

Method 1: The total amount of MSW generated and population of the municipality for the corresponding year were used to calculate the MSW generation rate per capita ( $tP1_{pc}$ ) for the most recent available year.

Method 2: Total MSW collected was divided by the collection coverage to estimate total MSW generated and then divided by the population reported for the corresponding year to calculate the MSW generation rate per capita ( $tP1_{pc}$ ). If the collection coverage was not reported, the total MSW collected was not used as this would exclude any uncollected waste.

Method 3: For cities that did not report data for the total MSW collected, but instead provided information of the amounts entering treatment and disposal facilities, it was assumed that the summation of the amounts entering the treatment and disposal facilities is equal to the total amount of MSW collected. The same process as method two was then repeated.

Only 31 cities reported waste generation according to *Method 1*, of which four of these (Lalitpur, Kathmandu, Biratnagar and Niamey) reported values inconceivably low ( $< 1.0 \text{ kg} \cdot \text{cap}^{-1} \cdot \text{y}^{-1}$ ) and were therefore removed. The waste generation rate was estimated using *Method 2* for a further 73 cities, although again four of these data points (Escuintla, Cobán, Huehuetenango, Rusape) were removed during initial screening due to the values being inconceivably high ( $> 10 \text{ kg} \cdot \text{cap}^{-1} \cdot \text{d}^{-1}$ ). Lastly, an additional six cities relied on *Method 3* for calculation of waste generation rate, of which one (Masvingo) was removed during screening based on an implausibly low value ( $0.04 \text{ kg} \cdot \text{cap}^{-1} \cdot \text{d}^{-1}$ ). In total, this resulted in 101 data points for MSW generation rate.

##### ***S.6.4.4.2   Collection coverage***

Collection coverage is reported in the UNSD dataset as percentage of population served. The most recent year was taken for this variable when available, resulting in 135 inputs for collection

coverage. To increase this further, the collection coverage was also calculated for cities that did not report collection coverage but did report the amounts entering treatment and disposal facilities, and the amounts generated overall. This resulted in a further 7 cases for which the collection coverage had not been previously reported.

#### **S.6.4.4.3 Formal dry recycling**

The UNSD waste questionnaire<sup>39</sup> asks respondents to detail the amounts of waste going to ‘recycling’, ‘composting’, ‘incineration’ (with a subset for ‘incineration with energy recovery’), ‘landfill’ (with a subset for ‘controlled landfill’), and ‘other’.

The primary data input in this work of formal collection for recycling (tC2i) has units of percentage of collected waste. Accordingly, the mass entries provided for recycling in the UNSD dataset were divided by the data point for mass of collected waste. However, in many cases, inconsistencies in the reported data meant this had to be done cautiously. The following rules and priorities were used in calculating the recycling rate:

1. If the sum of the five recovery and disposal options summed to within  $\pm 20\%$  of the mass reported as collected, the recycling rate was taken as the mass reported for recycling divided by the mass collected. Data calculated in this manner were assumed the most reliable and used as priority.
2. Occasionally, data records reported a mass collected from households but did not provide an overall collected amount. When the sum of the treatment and disposal options were within  $\pm 20\%$  of this household collected mass, it was assumed the household collected mass was misaligned and was instead taken as overall mass collected. Recycling rates were then calculated in the same manner as in 1.
3. If mass was provided only for recycling and collected waste (i.e., no other treatment and disposal options were recorded), the recycling rate was calculated based on the recycling mass divided by the collected mass.
4. In cases where the sum of the treated and disposed mass was not within  $\pm 20\%$  of the collected waste, the recycling rate was still calculated but instead using the treated and disposed mass as the denominator. Deviation of masses does not necessarily reflect incorrect data as the masses may deviate due to either rounding errors, based on deviations from sampling, or due to import / export of waste between municipalities. As such, recycling was still calculated in this manner, but only used when the above options were not possible.
5. If no mass was provided for recycling, but the sum of the treatment and disposal options were within  $\pm 20\%$  of the collected waste, it was assumed that no recycling occurs and therefore the recycling rate was set as 0%.

No distinction is given in the UNSD definition<sup>39</sup> provided for recycling on whether this includes informal sector recycling or not. Given the questionnaire states that the treatment and recovery values should sum up to the amounts of waste collected (minus exports), and that this collected waste is defined as that collected ‘*on behalf of municipalities (by public or private companies)*’; it is assumed the mass provided for recycling is intended to relate to formal recycling only. It is unclear whether respondents also took this to be the case and therefore whether the recycling rates reported include informally recycled material or not. The recycling rates calculated as per the above were therefore adjusted in the same manner as for the WaW2.0 dataset. Namely, the 28 LMC and LIC cities that had a non-zero recycling were assumed to be reporting informally

collected waste for recycling, particularly given many of the rates calculated were comparable to those of HIC. The recycling rates for these cities were therefore set to zero for tC2i – formal collection for recycling. Alternatively, the recycling rates for HIC were assumed to represent formal collection for recycling and therefore taken directly, whilst data points greater than zero in UMC were checked for plausibility by means of gathering evidence (**Table S15**).

**Table S15.** Evidence that formal recycling takes places in the municipalities reported in UNSD city waste data<sup>32</sup>.

| Municipality            | Country                | Reported recycling rate (% of collected waste) | Year | Plausibility | Reason                                                                                                                                                                                                                                                                | Reference |
|-------------------------|------------------------|------------------------------------------------|------|--------------|-----------------------------------------------------------------------------------------------------------------------------------------------------------------------------------------------------------------------------------------------------------------------|-----------|
| Adrar                   | Algeria                | 10.00                                          | 2015 | Unlikely     | Some evidence of the formal sector, however, seems that the informal sector still manages the bulk of the countries recycling. Government initiatives in place to increase reuse but seems to be limited focus on recycling.                                          | 122,123   |
| Djelfa                  | Algeria                | 10.00                                          | 2015 | Unlikely     | Noted as being an area with thriving informal recycling sector. Formal initiatives seem to focus on reuse not recycling.                                                                                                                                              | 122,124   |
| Algiers                 | Algeria                | 10.00                                          | 2015 | Unlikely     | Little evidence of formal recycling and evidence of strong informal sector. Sorting sites have little structure, and it is reported that many of these are no more than just a landfill.                                                                              | 124,125   |
| Wahran (Oran)           | Algeria                | 10.00                                          | 2015 | Unlikely     | Seem to be some initiatives in Oran for formal recycling but most of these appear to have been reported more recently than this data. Still seems to be a large informal sector in the municipality.                                                                  | 126-128   |
| Qacentina (Constantine) | Algeria                | 10.00                                          | 2015 | Unlikely     | Shortcomings in any formal processes that are in place and most recycling is done through the informal sector.                                                                                                                                                        | 129       |
| El Djazair (Algiers)    | Algeria                | 10.00                                          | 2015 | Unlikely     | Little evidence of formal recycling and evidence of strong informal sector. Sorting sites have little structure, and it is reported that many of these are no more than just a landfill.                                                                              | 124,125   |
| Minsk                   | Belarus                | 20.28                                          | 2019 | Plausible    | 26% recycling rate reported in Minsk. Unclear if this is all from the formal sector but it does seem that the government are trying to provide recycling facilities in the area. On the other hand, there is some evidence of the informal recycling sector in Minsk. | 130-132   |
| Zenica                  | Bosnia and Herzegovina | 4.76                                           | 2009 | Plausible    | Evidence 5% recycling rate for formal sector in the municipality.                                                                                                                                                                                                     | 133       |
| Gaborone                | Botswana               | 0.24                                           | 2017 | Unlikely     | Evidence suggests that all recycling is collected by informal sector.                                                                                                                                                                                                 | 134       |
| Francistown             | Botswana               | 0.25                                           | 2017 | Unlikely     |                                                                                                                                                                                                                                                                       |           |
| Brasília                | Brazil                 | 2.49                                           | 2015 | Unlikely     | Thriving informal sector and little evidence of formal sector recycling.                                                                                                                                                                                              | 91,135    |
| Salvador                | Brazil                 | 0.48                                           | 2011 | Unlikely     | Evidence that selective collection did not exist in any formal sense before 2014, therefore this is unlikely to be formally collected.                                                                                                                                | 136       |
| São Paulo               | Brazil                 | 0.98                                           | 2015 | Unlikely     | 25 coops are authorised in Sao Paulo – it is assumed the reported recycling rate relates to these cooperatives                                                                                                                                                        | 137       |

| Municipality   | Country            | Reported recycling rate (% of collected waste) | Year | Plausibility | Reason                                                                                                                                                                                                                                                                                                | Reference |
|----------------|--------------------|------------------------------------------------|------|--------------|-------------------------------------------------------------------------------------------------------------------------------------------------------------------------------------------------------------------------------------------------------------------------------------------------------|-----------|
| Rio de Janeiro | Brazil             | 0.09                                           | 2015 | Plausible    | Bulk of the recycling is via the informal recycling sector, with formal efforts only at a very small scale – the 0.09% is therefore plausible                                                                                                                                                         | 94,138    |
| Porto Alegre   | Brazil             | 3.43                                           | 2015 | Unlikely     | Evidence of a strong informal sector. Though there is an indication in the reference that some formal recyclates are collected, however it doesn't appear enough to justify the 3.42% stated.                                                                                                         | 139       |
| Camagüey       | Cuba               | 3.86                                           | 2017 | Plausible    | Evidence of both government sanctioned and organised recycling and sloe buy-back centres commensurate with a relatively low recycling rate as reported                                                                                                                                                | 140       |
| Quito          | Ecuador            | 0.86                                           | 2012 | Plausible    | Evidence that formal recycling takes place and will increase in the future, but also evidence of a strong informal sector across Ecuador. Given the low proportion, too low to represent a large informal sector, it is suggested here that the data represent formal operations rather than informal | 141-143   |
| Cuenca         | Ecuador            | 0.50                                           | 2012 | Plausible    | Evidence of Bring sites in the municipality but not formal collection by municipality – the very low rate reported indicates it cannot be the informal sector as too low                                                                                                                              | 144       |
| Tehran         | Iran, Islamic Rep. | 39.62                                          | 2017 | Unlikely     | References indicate that formal recycling is not carried out and that the informal sector is thriving                                                                                                                                                                                                 | 145,146   |
| Mashhad        | Iran, Islamic Rep. | 13.14                                          | 2017 | Unlikely     | Though some evidence of formal recycling exists, it does not appear to be substantial enough to justify 13.14% - therefore this is assumed to be a mixture – but classed as 'unlikely' for this screening process                                                                                     | 146,147   |
| Esfahan        | Iran, Islamic Rep. | 6.72                                           | 2017 | Plausible    | Evidence of a type of mixed waste sorting facility – the mechanism for collection is unclear, but the rate reported is low enough for this to be plausible.                                                                                                                                           | 148       |
| Astana         | Kazakhstan         | 16.41                                          | 2019 | Plausible    | The national statistics bureau indicates an 10.9% recycling rate nationwide in 2019 and 20.5% in 2020 - in Astana, a waste and recycling programme was proposed in 2006, so it is plausible that it is functioning now                                                                                | 149,150   |
| Almaty         | Kazakhstan         | 10.21                                          | 2019 | Plausible    | Various government websites extol the countries efforts to recycle one of which repots a 23% recycling rate for Almaty – the rate of 10.21 appears plausible for formal recycling, if a little high for a municipality of 2 million                                                                   | 151       |
| Tripoli        | Lebanon            | 5.47                                           | 2012 | Unlikely     | Though some news articles have indicated that Lebanon has plans to introduce formal recycling and it appear it has been done in some institutions, there is no historical evidence for formal recycling but strong evidence of an informal sector and various charitable initiatives                  | 152,153   |



| Municipality | Country      | Reported recycling rate (% of collected waste) | Year | Plausibility | Reason                                                                                                                                                                                                                                                                                                                                                                                                                                                                                                                                                                                                                                                                                                                                                                                           | Reference   |
|--------------|--------------|------------------------------------------------|------|--------------|--------------------------------------------------------------------------------------------------------------------------------------------------------------------------------------------------------------------------------------------------------------------------------------------------------------------------------------------------------------------------------------------------------------------------------------------------------------------------------------------------------------------------------------------------------------------------------------------------------------------------------------------------------------------------------------------------------------------------------------------------------------------------------------------------|-------------|
| Beirut       | Lebanon      | 4.00                                           | 2012 | Unlikely     | Though some news articles have indicated that Lebanon has plans to introduce formal recycling and it appear it has been done in some institutions, there is no historical evidence for formal recycling but strong evidence of an informal sector and various charitable initiatives                                                                                                                                                                                                                                                                                                                                                                                                                                                                                                             | 103,152,153 |
| Callao       | Peru         | 1.14                                           | 2019 | Unlikely     | Callao Municipality publishes a register of private companies and cooperatives who are licensed to selectively collect waste. It is suggested that the 1.14% reported equates to their activities as they can't be disaggregated and we consider the cooperatives to be informal, we have scored as 'unlikely'                                                                                                                                                                                                                                                                                                                                                                                                                                                                                   | 154         |
| Arequipa     | Peru         | 1.14                                           | 2019 | Unlikely     | Evidence of a sorting station (Yanahuara Recycling Plant) that has been implemented to replace previous waste picker activity on the dumpsite. As they were previously informal workers we will classify as unlikely to be formal here                                                                                                                                                                                                                                                                                                                                                                                                                                                                                                                                                           | 155         |
| Lima         | Peru         | 0.64                                           | 2019 | Plausible    | Evidence of some formal activity but still dominated by informal sector – some token bring banks are evident as the proportion is very low, it is suggested that it represents formal activities                                                                                                                                                                                                                                                                                                                                                                                                                                                                                                                                                                                                 | 156,157     |
| Soweto       | South Africa | $9.82\% \times (1 - 0.238) = 7.48\%$           | 2017 | Plausible    | Evidence indicates that formal recycling takes place, though: <b>1)</b> It is only provided directly by the municipality in about 24% of cases on average across South Africa; and <b>2)</b> Only approximately 23% and 16% of the residents of Cape Town and Johannesburg respectively report that they separate material for recycling. These two basic assertions do not seem to justify the quantities reported (11.26%). Therefore, we surmise that the figures reported by UNSD for Soweto and Cape Town include both formal and informal collection. The evidence also includes an estimate that says 23.8% of waste is collected by itinerant buyers. We therefore deducted this proportion from the proportion recycled reported by UNSD approximate the proportion formally collected. | 158         |
| Cape Town    | South Africa | $11.26\% \times (1 - 0.238) = 8.58\%$          | 2017 | Plausible    |                                                                                                                                                                                                                                                                                                                                                                                                                                                                                                                                                                                                                                                                                                                                                                                                  |             |

Often the value for recycling was left blank by the user. In cases where the amounts recorded as going to treatment and disposal options were within 20% of the collected waste (or household collected waste if collected waste was not provided), it was assumed that all mass had been accounted for by the user and therefore this blank was treated as a zero.

#### S.6.4.4.4 Incineration

The amount of waste going to incineration is a data point in the UNSD waste data<sup>32</sup> along with a subset for the amount of that incineration with energy recovery. A similar approach was taken as with the recycling data point, whereby the incineration rate as a percentage of collected waste (tC2iii) was calculated first by dividing the mass reported incinerated by the mass reported as collected. In a small number of cases, the amount collected was reported as household collection instead of overall collection. In these instances, the incineration rate was calculated as the mass incinerated divided by the amounts collected from households. Lastly, if data on the amount collected were not reported, but data on the amount going to each facility were, it was assumed

that the sum of the amount going to recovery and disposal facilities equalled the amount collected. This summed value was then used as the denominator in the calculation of the incineration rate.

In total, 67 records yielded an incineration rate, although only 21 of these reported a non-zero rate. However, analysis of the dataset suggested that some records of MSW incineration may have been because of a misclassification. For instance, small amounts of medical (hazardous waste), or waste that is open burned may have been included. As we were only interested in modelling full scale MSW incineration, we assessed the plausibility that incineration was actually taking place in each of these 21 cities by corroborating the assertion with other sources which we have detailed **Table S16**.

**Table S16.** Evidence that incineration takes places in the municipalities reported in UNSD city waste data<sup>32</sup>.

| Municipality   | Country                                    | Calculated incineration rate (% of collected waste) | Year | Plausibility | Reason                                                                                                                                                                                                                                  | Reference |
|----------------|--------------------------------------------|-----------------------------------------------------|------|--------------|-----------------------------------------------------------------------------------------------------------------------------------------------------------------------------------------------------------------------------------------|-----------|
| Baku           | Azerbaijan                                 | 44.8                                                | 2019 | Plausible    | Evidence of incineration with energy recovery in Baku.                                                                                                                                                                                  | 159       |
| Thimphu        | Bhutan                                     | 15.0                                                | 2017 | Unlikely     | No evidence of incineration of MSW, but there is for incineration of hazardous medical waste.                                                                                                                                           | 160,161   |
| Gaborone       | Botswana                                   | 0.4                                                 | 2017 | Unlikely     | No evidence of incineration. Perhaps confused with open burning which is reported to occur.                                                                                                                                             | 134       |
| Francistown    | Botswana                                   | 0.3                                                 | 2017 | Unlikely     |                                                                                                                                                                                                                                         |           |
| Brasilia       | Brazil                                     | 0.3                                                 | 2009 | Unlikely     | No evidence of incineration in Brazil. Small percentages here may relate to hazardous waste incineration.                                                                                                                               | 162       |
| Rio de Janeiro | Brazil                                     | 0.02                                                | 2009 | Unlikely     |                                                                                                                                                                                                                                         |           |
| Shanghai       | China                                      | 65.6                                                | 2019 | Plausible    | Evidence of incineration for each city in national statistics.                                                                                                                                                                          | 33        |
| Chongqing      | China                                      | 50.6                                                | 2019 | Plausible    |                                                                                                                                                                                                                                         |           |
| Beijing        | China                                      | 48.9                                                | 2019 | Plausible    |                                                                                                                                                                                                                                         |           |
| Macao          | China, Macao Special Administrative Region | 98.5                                                | 2015 | Plausible    | Evidence of incineration in Macao.                                                                                                                                                                                                      | 163       |
| Zagrab         | Croatia                                    | 0.1                                                 | 2012 | Unlikely     | Evidence of incineration project being scrapped due to public opposition.                                                                                                                                                               | 164       |
| Cuenca         | Ecuador                                    | 0.2                                                 | 2011 | Unlikely     | No evidence of incineration. Small percentages here may relate to hazardous waste incineration.                                                                                                                                         | 119       |
| Schaan         | Liechtenstein                              | 47.1                                                | 2019 | Plausible    | Although there are no incineration plants in Liechtenstein it is reported that much waste is exported to Switzerland for incineration, hence this is assumed plausible.                                                                 | 165       |
| Monaco         | Monaco                                     | 89.9                                                | 2017 | Plausible    | Original value reported exceeds 100%. It is believed this is a typo and the value of 130,000 tonnes/year was replaced with 30,000 tonnes/year. Regardless, there is evidence of widespread incineration with energy recovery in Monaco. | 166       |

| Municipality | Country  | Calculated incineration rate (% of collected waste) | Year | Plausibility | Reason                                                                                                                                                                                                         | Reference |
|--------------|----------|-----------------------------------------------------|------|--------------|----------------------------------------------------------------------------------------------------------------------------------------------------------------------------------------------------------------|-----------|
| Yangon       | Myanmar  | 1.9                                                 | 2017 | Plausible    | Incineration plant opened in 2017 with plans to develop further.                                                                                                                                               | 167       |
| Zinder       | Niger    | 1.0                                                 | 2006 | Unlikely     | No evidence of incineration. Small percentages here may relate to hazardous waste incineration.                                                                                                                | 119       |
| Niamey       | Niger    | 1.0                                                 | 2006 | Unlikely     |                                                                                                                                                                                                                |           |
| Kiev         | Ukraine  | 13.8                                                | 2019 | Plausible    | As of 2013, one incineration plant was operation in Kiev although this reportedly incinerating only 1% of MSW in Kiev and was beyond its designed lifespan. It is plausible that this has since been upgraded. | 168       |
| Songea       | Tanzania | 0.8                                                 | 2015 | Unlikely     | No evidence of incineration. Small values may represent hazardous waste incineration such as medical waste.                                                                                                    | 119       |
| Moshi        | Tanzania | 0.2                                                 | 2015 | Unlikely     |                                                                                                                                                                                                                |           |
| Kwekwe       | Zimbabwe | 7.9                                                 | 2015 | Unlikely     | No evidence of incineration in 2015 although a plant has recently been approved.                                                                                                                               | 169       |

897 Abbreviations: municipal solid waste (MSW).

898 As with formal recycling, blank values were treated as zero if the sum of the treated and disposed  
899 waste summed to within 20% of the collected waste.

#### 900 ***S.6.4.4.5 Other recovery***

901 The primary data input ‘formal collection of MSW for other recovery’ (tC2ii) is composed of  
902 two categories from the UNSD waste data, namely ‘composting’ and ‘other treatment methods’.  
903 The overall recovery rate as a percentage of collected was first calculated in the same manner as  
904 that for incineration. The collected waste was first prioritised as the denominator, followed by  
905 household collected waste, and lastly treated and disposed waste. Likewise, blank values were  
906 treated as zero if the sum of the treated and disposed waste summed to within 20% of the  
907 collected waste.

#### 908 ***S.6.4.4.6 Controlled disposal***

909 The definition for ‘controlled landfill’ in the UNSD waste questionnaire states ‘*final placement*  
910 *of waste into or onto the land in a controlled landfill site*’<sup>39</sup>. No clarification is provided on what  
911 constitutes ‘control’. As such, a respondent’s decision about whether a disposal site is controlled  
912 is likely to be subjective and cannot be directly correlated with the definition used in the present  
913 work. In the absence of this clear definition, given the use explicit use of term ‘controlled’, we  
914 assumed that the definition for controlled landfill provided in the UNSD dataset matches that  
915 used in the present work.

916 The proportion of waste collected for disposal that is sent for controlled disposal (tC3) was  
917 calculated by dividing ‘controlled landfill’ by total ‘landfill’, provided that the sum of the mass  
918 going to treatment and disposal facilities was within  $\pm 20\%$  of the mass of collected waste ( $n =$   
919 113). As before, due to the incorrect assignment of values to household collected waste instead  
920 of total collected waste by some respondents, ‘controlled disposal’ was also calculated using the

‘household collected waste’ as the denominator. This was only used if the previous method was not available (n = 7). This gave 120 records for controlled disposal (tC3) from the UNSD dataset.

If a value for ‘landfill’ was provided but the value for ‘controlled landfill’ was left blank by the user, it was assumed that no waste was assigned to ‘controlled landfill’ and therefore set as zero.

#### **S.6.4.5 SIPSN Data**

Municipal level solid waste management data for Indonesia is recorded as part of a national dataset entitled ‘Sistem Informasi Pengelolaan Sampah Nasional’<sup>34</sup>, hereafter referred to as SIPSN. Data is recorded at the municipality / Regency level of which there are 514 in Indonesia; however, not all of these have data available. Data for the year 2020 was used in this analysis.

The mass of waste generated in tonnes per day is directly recorded in SIPSN. This was converted to a per capita waste generation rate by dividing by the population of the Regency as obtained from the 2020 BPS census<sup>170</sup>.

Collection coverage is not reported in the SIPSN data. This may be due to the highly decentralised nature of waste collection in Indonesia meaning collection of waste and transportation to transfer stations (*TPS*) is the responsibility of neighbourhood associations (*Rukun Warga*)<sup>171,172</sup>. Despite this, the SIPSN dataset records the amount of waste entering disposal sites (*TPA*) and the amounts recovered at transfer stations with material recovery facilities (*TPS3R*). The collection coverage was therefore estimated for each Regency by summing the amount of waste entering disposal sites with the amount of waste recovered at *TPS3R* sites, before dividing by the reported mass of waste generation.

To avoid double counting, it was ensured that the recovered mass at *TPS3R* sites did not include any residuals that would later be transferred to disposal sites. Similarly, the SIPSN dataset reports the mass of recyclables collected by informal recyclers at disposal sites. This too is subtracted from the mass collected, as informal recycling collection is modelled within this work and added on as part of the *Full MSW MFA* (Section S.7). Again this avoided any double counting.

The mass of recyclate recovered by the formal sector was calculated from the SIPSN data by summing the amounts of ‘dry recycling’ recovered at *TPS3R*’s by the formal sector with the mass of ‘inert recovery’ recorded at the disposal sites. We chose this summation on the basis that it would be closest to the way that formal recycling is reported in the other datasets (for example: WaW2.0 and UNSD). Informal sector recovery at the disposal sites and ‘organic recovery’ are recorded as separate data points in the SIPSN dataset, therefore it can be assumed that the summed values reflect that of formal dry recycling only. The calculated mass of recyclate recovered by the formal was divided by the mass of collected waste to give the formal dry recycling rate as a percentage of formally collected waste (tC2i).

Similarly, the primary data input for formal collection of MSW for other recovery (tC2ii) was calculated by summing the mass of ‘composting’ occurring at *TPS3R*’s with the mass of ‘organic recovery’ at the disposal sites, before dividing this by the mass of collected waste.

The composition of MSW is not provided in the SIPSN waste dataset, therefore the primary data input ‘plastic in MSW’ (C0) was unable to be calculated. Small amounts of waste were reported

to be processed using ‘waste-to-energy’ in 37 municipalities in the SIPSN. We assumed that all of these were misclassifications as Terzidis<sup>119</sup> reported no operational large scale MSW incinerators in Indonesia.

The level of environmental control at the disposal sites is reported by the SIPSN data according to three categories: ‘sanitary landfill’, ‘controlled landfill’ and ‘open dumping’. It is unclear how these categories are defined, with it perhaps being subjective to the respondent. The definition for controlled disposal of MSW (tC3) used in the present work is ‘basic’, ‘improved’, or ‘full control’ according to the ‘Ladder of control level for landfill sites’ in the Waste Wise Cities Tool<sup>6</sup>. This states that to achieve the status of basic control, amongst other things the site must have a functioning weighbridge in use and have perimeter drainage maintained around the site. The SIPSN dataset details for each disposal site whether a weighbridge is in use and whether the site has drainage, therefore this data was used to cross check the response provided. If the Regency recorded their disposal site as a ‘sanitary landfill’ or ‘controlled landfill’, but also stated they did not have either a functioning weighbridge or perimeter drainage, then the disposal site class was downgraded to an uncontrolled site. If the disposal site was recorded as ‘open dumping’, this was automatically assigned uncontrolled, regardless of the presence of weighbridges or perimeter drainage, given the WaCT ladder of control also specifies a degree of cover is required for basic control. As such, a disposal site was only classified as controlled if it was recorded as a ‘sanitary landfill’ or ‘controlled landfill’ and had both a functioning weighbridge and perimeter drainage. The mass of waste going to controlled disposal sites in each regency was divided by the total mass of waste going to disposal to arrive at an estimate for tC3: controlled disposal as a percentage of disposed waste.

The entire SIPSN dataset was not used, but instead a sample ( $n = 10$ ) was extracted to ensure Indonesia was not being overrepresented in the subsequent machine learning steps. Details of this procedure are described in **Section S.6.2**.

#### **S.6.4.6 MoHURD Data**

The Ministry of Housing and Rural Development (MoHURD) in China release an annual dataset entitled ‘Urban Construction Statistical Yearbook’<sup>33</sup>. The 2019 version of this was used in this analysis, specifically the data points relating to mass of waste collected and transported by each municipality and the masses incinerated. The other inputs required for this work were either not reported (collection coverage), were unreliable (controlled disposal), or do not feature sufficient distinction (cannot differentiate between recycling and composting).

##### ***S.6.4.6.1 Waste generation***

To estimate the primary input of waste generation rate ( $tP1_{pc}$ ) the mass collected and transported was used as a starting point. However, this does not include waste that was generated and not collected, and therefore required correction by dividing by the collection coverage. Given the collection coverage is not a variable specified in the MoHURD dataset, an alternative approach was used for this correction. Initially, the collection coverage was estimated for each municipality based on the machine learning random forest process outlined in **Section S.7**. The collected and transported mass were then divided by predicted collection coverages to arrive at an estimate of total waste generation. This could then be divided by the population of the municipality as reported in the MoHURD dataset to arrive at a per capita waste generation rate.

#### ***S.6.4.6.2 Incineration***

The percentage of collected waste that was incinerated (tC2iii) was derived by dividing the mass of waste going to incineration by the reported mass of waste collected and transported. In some cases, ambiguous administrative boundaries meant that it was difficult to assign incineration data to a specific GADM polygon. In these cases, the amount of waste reported as incinerated for the province was distributed amongst the polygons within it using its population.

The MoHURD dataset provided a full record of incineration for China, so we used these values directly in the probabilistic MFA, replacing any predictions from the machine learning steps (**Section S.9.1.2.7**). In contrast to the waste generation rate, a subset of the China incineration data was not randomly extracted from the from the MoHURD dataset for use in the machine learning steps (**Section S.6.2**). This was to avoid overly influencing (i.e., introduce bias) the training data with data for China, particularly given incineration in other UMCs is uncommon.

### **S.6.5 Data consolidation and deduplication**

Following the initial data collection, harmonisation, correction, and preliminary screening phase described in **Section S.6.4**, data were combined into a single dataset with 691 municipal records. Each data record included:

- A unique data ID, linking the record to the source dataset
- Country name and ISO3 code
- Income category of the country for the year of the data record
- Name of the municipality (as per the original dataset)
- A unique administrative area ID identifying which GADM polygon the data record was assigned to (if any)
- GADM Level, administrative area match score, and any notes associated with the boundary matching

Data records also included one or more of the following:

- Waste generation rate (tP1<sub>pc</sub>) and year (n = 582)
- Collection coverage (tC1) and year (n = 498)
- Plastic in MSW (C0) and year (n = 397)
- Rigid plastic (C0a) and year (n = 38)
- Formal dry recycling (tC2i) and year (n = 422)
- Other recovery (tC2ii) and year (n = 422)
- Incineration (tC2iii) and year (n = 441)
- Controlled disposal (tC3) and year (n = 458)
- SDG11.6.1 – MSW collected and managed in controlled facilities (n = 38)

Following consolidation, municipalities which were unable to be assigned a GADM boundary match (boundary match score of 4 as per **Table S6**) were removed from the analysis (n = 15). Likewise, data points older than 15 years (2006 at time of analysis) were also removed as it was assumed these data points were no longer relevant because waste management is likely to have changed substantially since then (n = 22). As an exception, a minority (n = 13) of WaW2.0 records older than 2006 were retained due to the underlying uncertainty around the year of data

collection for data points other than waste generation rate (**Section S.6.4.3.7**) and to maximise data availability. All except one of these data records retained were post-2000.

95 municipalities had more than one record ( $n = 201$ ) which either had to be merged or removed. Data were prioritised based on most recent year of data collection and dataset quality in the following quality assurance hierarchy 1) WaCT; 2) WABI; 3) WaW2.0; and 4) UNSD, the justification of which is detailed in **Table S4 (Section S.6.1)**. Most recent data were selected first unless data from a higher quality data point was available within three years. If a record was missing a data point, then one from an older or lower quality dataset was used. Only one duplicate, Taian in China, existed for the records sampled from the national datasets. In this case, the MoHURD data were prioritised over that of the WABI dataset because the year was more recent. Records which were constructed from multiple data sources were given a new data id with prefix ‘CD’.

## **S.6.6 Default GADM Level selection**

Of the 254 countries covered by the GADM dataset<sup>1</sup>, 175 of these had at least one data record associated with it. The remaining 79 countries were mainly small countries and island states with small population or entirely uninhabited. Whilst these would be likely to have negligible impact on our global analysis, the lack of data indicates the need for data collection in less populous nations.

For the 175 countries with municipal level waste data, 134 had data records with a consistent GADM Level that had previously been assigned in **MS2 (Section S.6.3)**. In these cases, the consistent GADM Level was assigned as that country’s municipal Level, described hereafter as the ‘*default GADM Level*’. Some countries ( $n = 41$ ) had data records that were assigned to more than one GADM Level. In these cases, the *default GADM Level* was assigned as the Level for which the majority of that country’s data records represented.

Data records that had been assigned a GADM Level that was more granular than the *default GADM Level* were removed from the analysis ( $n = 4$ ), whereas data records at a less granular level were added alongside the *default GADM Level* by merging the underlying polygons ( $n = 39$ ) (**Table S17**). Additionally, a few records ( $n = 12$ ) were allocated multiple GADM administrative boundaries at the same Level as this better matched the area for which the record represented (e.g., data for Melbourne was better represented by combining multiple Level 2 GADM polygons rather than choosing Level 1 which referred to the wider State). In these cases, the GADM polygons were merged into a single polygon and assigned the unique ID of the lowest numerical unique ID of the merged polygons along with the subscript ‘Merged’ to highlight changes that had occurred compared to the original GADM dataset.

A small number ( $n = 22$ ) of data records were allocated multiple GADM Levels because the administrative boundary was identical across different Levels. Typically, but not exclusively, this occurred for capital cities that have special administrative areas (e.g., cities that are both provinces and municipalities). In these cases, the data record was assigned the same Level as that of the *default GADM Level*.

Of the 79 countries for which no data existed, the majority of these countries ( $n=65$ ) were small island states which had either no resident population, no subnational administrative divisions, or

only a single subnational administrative division. The *default GADM Level* was therefore assigned for these as the most granular GADM Level available (either Level 0 or Level 1). The remaining countries without data were instead assigned the *default GADM Level* thought most likely to represent the municipal Level. All these allocations of *default GADM Levels* are documented in the **Supplementary Table 1** (cleaning, combining and deduplication steps).

**Table S17.** Municipal records which were assigned to a newly created merged polygon.

| Country                | Municipality   | Default GADM Level | Data record Level | Unique ID of data point |
|------------------------|----------------|--------------------|-------------------|-------------------------|
| Bangladesh             | Dhaka          | 3                  | 2                 | BGD.3.1_1               |
| Bangladesh             | Chittagong     | 3                  | 2                 | BGD.2.4_1               |
| Benin                  | Porto Novo     | 2                  | 1                 | BEN.10_1                |
| Bosnia and Herzegovina | Sarajevo       | 3                  | 2                 | BIH.2.6_1               |
| Burundi                | Bujumbura      | 2                  | 1                 | BDI.2_1                 |
| Cambodia               | Sihanoukville  | 2                  | 1                 | KHM.13_1                |
| Cambodia               | Phnom Penh     | 2                  | 1                 | KHM.16_1                |
| Cameroon               | Douala         | 3                  | 2                 | CMR.5.4_1               |
| Cameroon               | Yaounde        | 3                  | 2                 | CMR.2.7_1               |
| Canada                 | Vancouver      | 3                  | 2                 | CAN.2.14_1              |
| China                  | Lanzhou        | 3                  | 2                 | CHN.5.7_1               |
| China                  | Suzhou         | 3                  | 2                 | CHN.15.7_1              |
| China                  | Shanghai       | 3                  | 2                 | CHN.24.1_1              |
| China                  | Chongqing      | 3                  | 2                 | CHN.3.1_1               |
| China                  | Beijing        | 3                  | 2                 | CHN.2.1_1               |
| Cuba                   | Havana         | 2                  | 1                 | CUB.4_1                 |
| Czech Republic         | Prague         | 2                  | 1                 | CZE.11_1                |
| Egypt                  | Cairo          | 2                  | 1                 | EGY.11_1                |
| Egypt                  | Suez City      | 2                  | 1                 | EGY.15_1                |
| Ethiopia               | Addis Ababa    | 3                  | 2                 | ETH.1.1_1               |
| France                 | Paris          | 3                  | 2                 | FRA.8.3_1               |
| Greece                 | Athens         | 3                  | 2                 | GRC.3.1_1               |
| Guatemala              | Guatemala City | 2                  | 1                 | GTM.7_1                 |
| India                  | Chennai        | 3                  | 2                 | IND.31.2_1              |
| India                  | Greater Mumbai | 3                  | 2                 | IND.20.18_1             |
| Indonesia              | Jakarta        | 2                  | 1                 | IDN.7_1                 |
| Mexico                 | Mexico City    | 2                  | 1                 | MEX.9_1                 |
| Nigeria                | Lagos          | 2                  | 1                 | NGA.25_1                |
| Pakistan               | Karachi        | 3                  | 2                 | PAK.8.2_1               |
| Peru                   | Lima           | 3                  | 2                 | PER.15.1_1              |
| Peru                   | Callao         | 3                  | 2                 | PER.7.1_1               |
| Russia                 | Moscow         | 2                  | 1                 | RUS.43_1                |
| Rwanda                 | Kigali         | 2                  | 1                 | RWA.5_1                 |
| Senegal                | Dakar          | 4                  | 1                 | SEN.1_1                 |
| Serbia                 | Belgrade       | 2                  | 1                 | SRB.3_1                 |
| Slovakia               | Bratislava     | 2                  | 1                 | SVK.2_1                 |
| Tajikistan             | Dushanbe       | 3                  | 2                 | TJK.1.1_1               |
| Tanzania               | Dar es Salaam  | 2                  | 1                 | TZA.2_1                 |
| Thailand               | Bangkok        | 2                  | 1                 | THA.3_1                 |



| Country        | Municipality     | Default GADM Level | Data record Level | Unique ID of data point |
|----------------|------------------|--------------------|-------------------|-------------------------|
| Ukraine        | Kiev             | 2                  | 1                 | UKR.11_1                |
| United Kingdom | London           | 3                  | 2                 | GBR.1.36_1              |
| Vietnam        | Hanoi            | 2                  | 1                 | VNM.27_1                |
| Vietnam        | Ho Chi Minh City | 2                  | 1                 | VNM.25_1                |

1090

1091 A vector layer was created from the GADM dataset <sup>1</sup> that included the *default GADM Level*  
1092 assigned for each country as well as the above modifications. In total this resulted in 50,702  
1093 *default GADM Level* polygons that represent the municipalities of the world (**Fig. S9**). The  
1094 *default GADM Levels* varied from Level 0 (national Level) in the case of small island states, to  
1095 Level 4 for the cases of Finland and Nepal.

1096

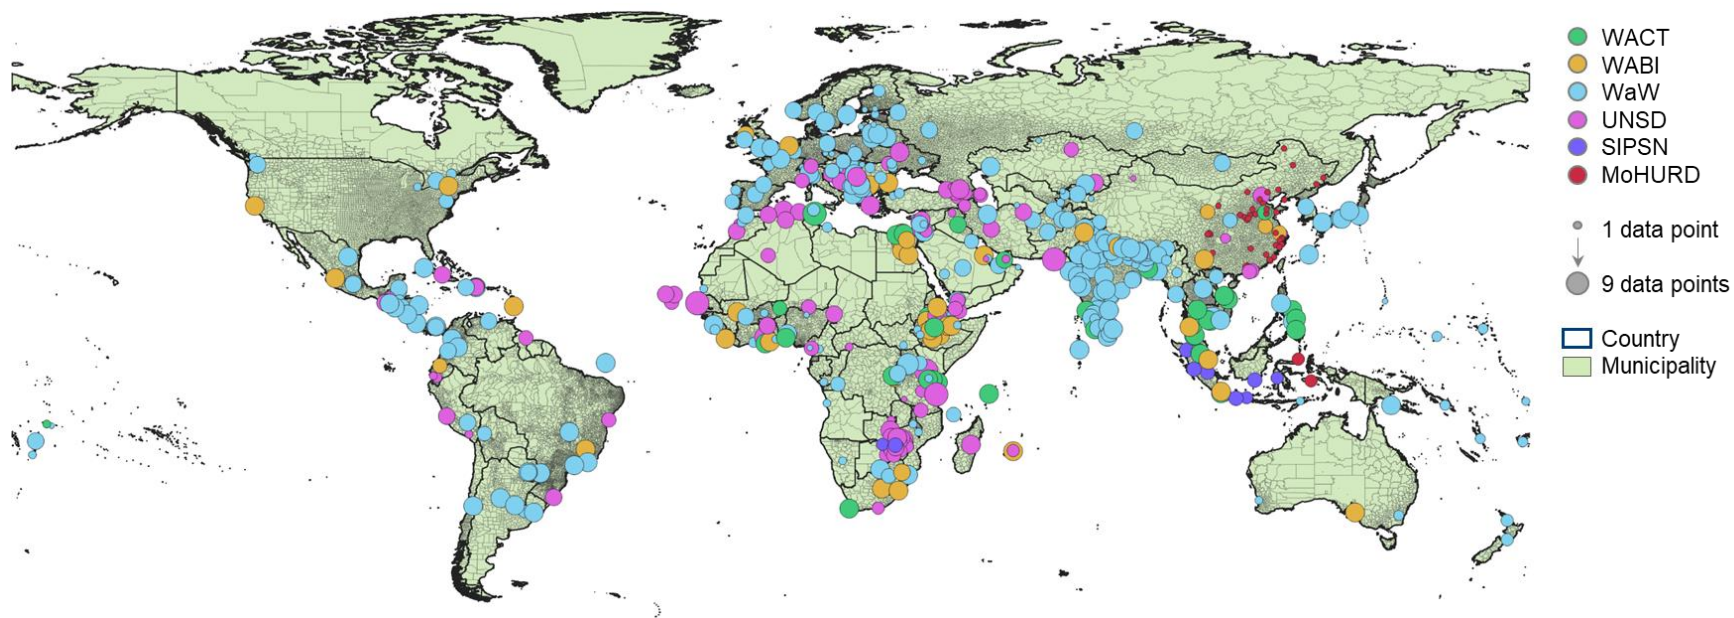

1097

1098 **Fig. S9.** Locations of *primary input data* by source dataset. Size of circles indicates number of data points in each location.

1099

1100

1101

## S.6.7 Data cleaning via outlier identification

Although initial data screening was performed on each individual dataset as described in **Section S.6.4**, this was primarily checking for obvious errors in the way the data was reported by users (e.g., wrong units) and making educated assumptions around what the data they reported was likely representing (plausibility checks). This section instead describes the checks applied to assess the reliability of the data via outlier identification, and, as such, was only performed once all the data had been combined into a single dataset.

Box and whiskers plots for each of the seven waste related *primary data variables* (**Fig. S10**) enabled visualisation of trends in the data and gave a first indication of potential outliers using the rule proposed by Tukey<sup>84</sup>, which states that outliers are those data points which are more than 1.5 times the interquartile range distance from the 25<sup>th</sup> or 75<sup>th</sup> percentiles. However, this alone was deemed insufficient for potential outlier detection due to the data being often skewed. For example, waste generation rate is bound by zero therefore tends to have a long positive tail. Similarly, the dependent variables with units of percentages are bound between 0 and 100, therefore also tend to show either skewed distributions or bimodal distributions as many values fall at the limits. Setting outliers as 1.5 times the interquartile range in these situations often causes the whiskers to exceed the bounds of the data therefore failing to identify potential outliers. To overcome this, the fences as proposed by the 1.5 the interquartile range definition were used as guides along with expert opinion of the authors on what values should be crosschecked for potential implausibility. In general, the fences were set more conservatively than that proposed by the interquartile range rule, to ensure all potential outliers were screened for plausibility. This process was carried out for each dependent variable by income category of the country, with details of the fences used shown in **Table S18**.

Data points identified as potential outliers were not automatically removed from the dataset, but instead screened for plausibility (**Fig. S10**). This manual approach to removal of outliers was deemed preferential to automatic outlier removal as the global data was derived from many different socio-economic conditions, therefore one would expect some outlying values to be true values. Plausibility checks were based on expert opinion of the authors alongside as assessment of the data source reliability and context of the municipality that could be potentially resulting in an outlying value (e.g., tourism levels, whether it is a capital city or major commercial hub, and comparison to other values from that country).

**Table S18.** Upper and lower fences set based on expert opinion for which values outside these values were screened for plausibility.

| ID                | Primary data input                          | Unit                                         | Country income category* | Total data points | Lower fence | Upper fence | Outlier cases below lower fence | Outlier cases above upper fence | Outlier cases removed for implausibility |
|-------------------|---------------------------------------------|----------------------------------------------|--------------------------|-------------------|-------------|-------------|---------------------------------|---------------------------------|------------------------------------------|
| tP1 <sub>pc</sub> | MSW generation rate                         | kg·cap <sup>-1</sup> ·d <sup>-1</sup>        | LIC                      | 80                | 0.2         | 1.37        | 5                               | 5                               | 9 out of 10                              |
|                   |                                             |                                              | LMC                      | 171               | 0.3         | 1.53        | 4                               | 14                              | 9 out of 18                              |
|                   |                                             |                                              | UMC                      | 162               | 0.4         | 2.07        | 7                               | 5                               | 5 out of 12                              |
|                   |                                             |                                              | HIC                      | 82                | 0.7         | 2.49        | 7                               | 5                               | 4 out of 12                              |
| tC1               | Collection coverage                         | % of MSW generated                           | LIC                      | 72                | 20          | 80          | 5                               | 24                              | 14 out of 29                             |
|                   |                                             |                                              | LMC                      | 173               | 40          | 100         | 13                              | 0                               | 1 out of 13                              |
|                   |                                             |                                              | UMC                      | 111               | 70          | 100         | 14                              | 0                               | 11 out of 14                             |
|                   |                                             |                                              | HIC                      | 55                | 100         | 100         | 9                               | 0                               | 3 out of 9                               |
| tC2i              | Formal collection of MSW for dry recycling  | % wt. of formally collected MSW              | LIC                      | 65                | 0           | 0           | 0                               | 1                               | 0 out of 1                               |
|                   |                                             |                                              | LMC                      | 131               | 0           | 5           | 0                               | 0                               | 0 out of 0                               |
|                   |                                             |                                              | UMC                      | 97                | 0           | 5           | 0                               | 13                              | 0 out of 13                              |
|                   |                                             |                                              | HIC                      | 71                | 0           | 50          | 0                               | 6                               | 6 out of 6                               |
| tC2ii             | Formal collection of MSW for other recovery | % wt. of formally collected MSW              | LIC                      | 65                | 0           | 10          | 0                               | 1                               | 0 out of 1                               |
|                   |                                             |                                              | LMC                      | 133               | 0           | 15          | 0                               | 26                              | 11 out of 26                             |
|                   |                                             |                                              | UMC                      | 97                | 0           | 20          | 0                               | 4                               | 3 out of 4                               |
|                   |                                             |                                              | HIC                      | 66                | 0           | 20          | 0                               | 5                               | 0 out of 5                               |
| tC2iii            | Formal collection of MSW for incineration   | % wt. of formally collected MSW              | LIC                      | 68                | 0           | 0           | 0                               | 1                               | 0 out of 1                               |
|                   |                                             |                                              | LMC                      | 138               | 0           | 0           | 0                               | 1                               | 0 out of 1                               |
|                   |                                             |                                              | UMC                      | 104               | 0           | 0           | 0                               | 11                              | 1 out of 11                              |
|                   |                                             |                                              | HIC                      | 68                | 0           | 0           | 0                               | 26                              | 2 out of 26                              |
| tC3               | Controlled disposal of MSW                  | % wt. of formally collected MSW for disposal | LIC                      | 68                | 0           | 0           | 0                               | 13                              | 3 out of 13                              |
|                   |                                             |                                              | LMC                      | 155               | 0           | 50          | 0                               | 48                              | 7 out of 48                              |
|                   |                                             |                                              | UMC                      | 106               | 50          | 100         | 47                              | 0                               | 4 out of 47                              |
|                   |                                             |                                              | HIC                      | 66                | 100         | 100         | 22                              | 0                               | 18 out of 22                             |
| C0                | Plastic in MSW                              | % wt. of MSW generated                       | LIC                      | 69                | 3           | 20          | 7                               | 4                               | 4 out of 11                              |
|                   |                                             |                                              | LMC                      | 133               | 3           | 25          | 13                              | 1                               | 10 out of 14                             |
|                   |                                             |                                              | UMC                      | 87                | 5           | 25          | 7                               | 2                               | 4 out of 9                               |
|                   |                                             |                                              | HIC                      | 69                | 5           | 25          | 6                               | 4                               | 7 out of 10                              |

\*Abbreviations: High-income country (HIC); upper-middle income country (UMC); lower-middle income country (LMC); low-income country (LIC).

The cleaning process resulted in the removal of 136 (35%) out of 386 outlier data points. Removal of these data points had minimal impact on the central values (mean and median) or quartiles of input data (**Fig. S10**). Combined with the non-outliers, there were 553 cleaned records (municipalities with data) and 2,688 individual data points. Although the 553 records represent only 1.1% of global municipalities, approximately 904 million people live in them based on 2015 populations. This represents 12.2% of the 2015 global population, with similar coverage levels spanning all four income categories (LIC: 12.0%, LMC: 11.4%, UMC: 13.5%, HIC: 11.2%). Records are distributed across 172 countries and many major cities, as shown in **Fig. S9**. We are therefore confident that the data collected represents the most widespread and quality checked municipal level data on municipal solid waste management to date. A summary of the data collection and cleaning process is shown in **Fig. S11**.

**Fig. S10.** Central tendency and spread of *primary data inputs* by country income category prior to outlier removal (red box plots) and post outlier removal (blue box plots). Dots represent outliers according to the  $1.5 \times$  interquartile range rule<sup>84</sup>. Crosses represent the mean value. The distribution of data as shown in the box plots was used to set fences around which outliers were identified and checked for plausibility (**Table S18**). Abbreviations: high-income country (HIC); upper-middle income country (UMC); lower-middle income country (LMC); low-income country (LIC).

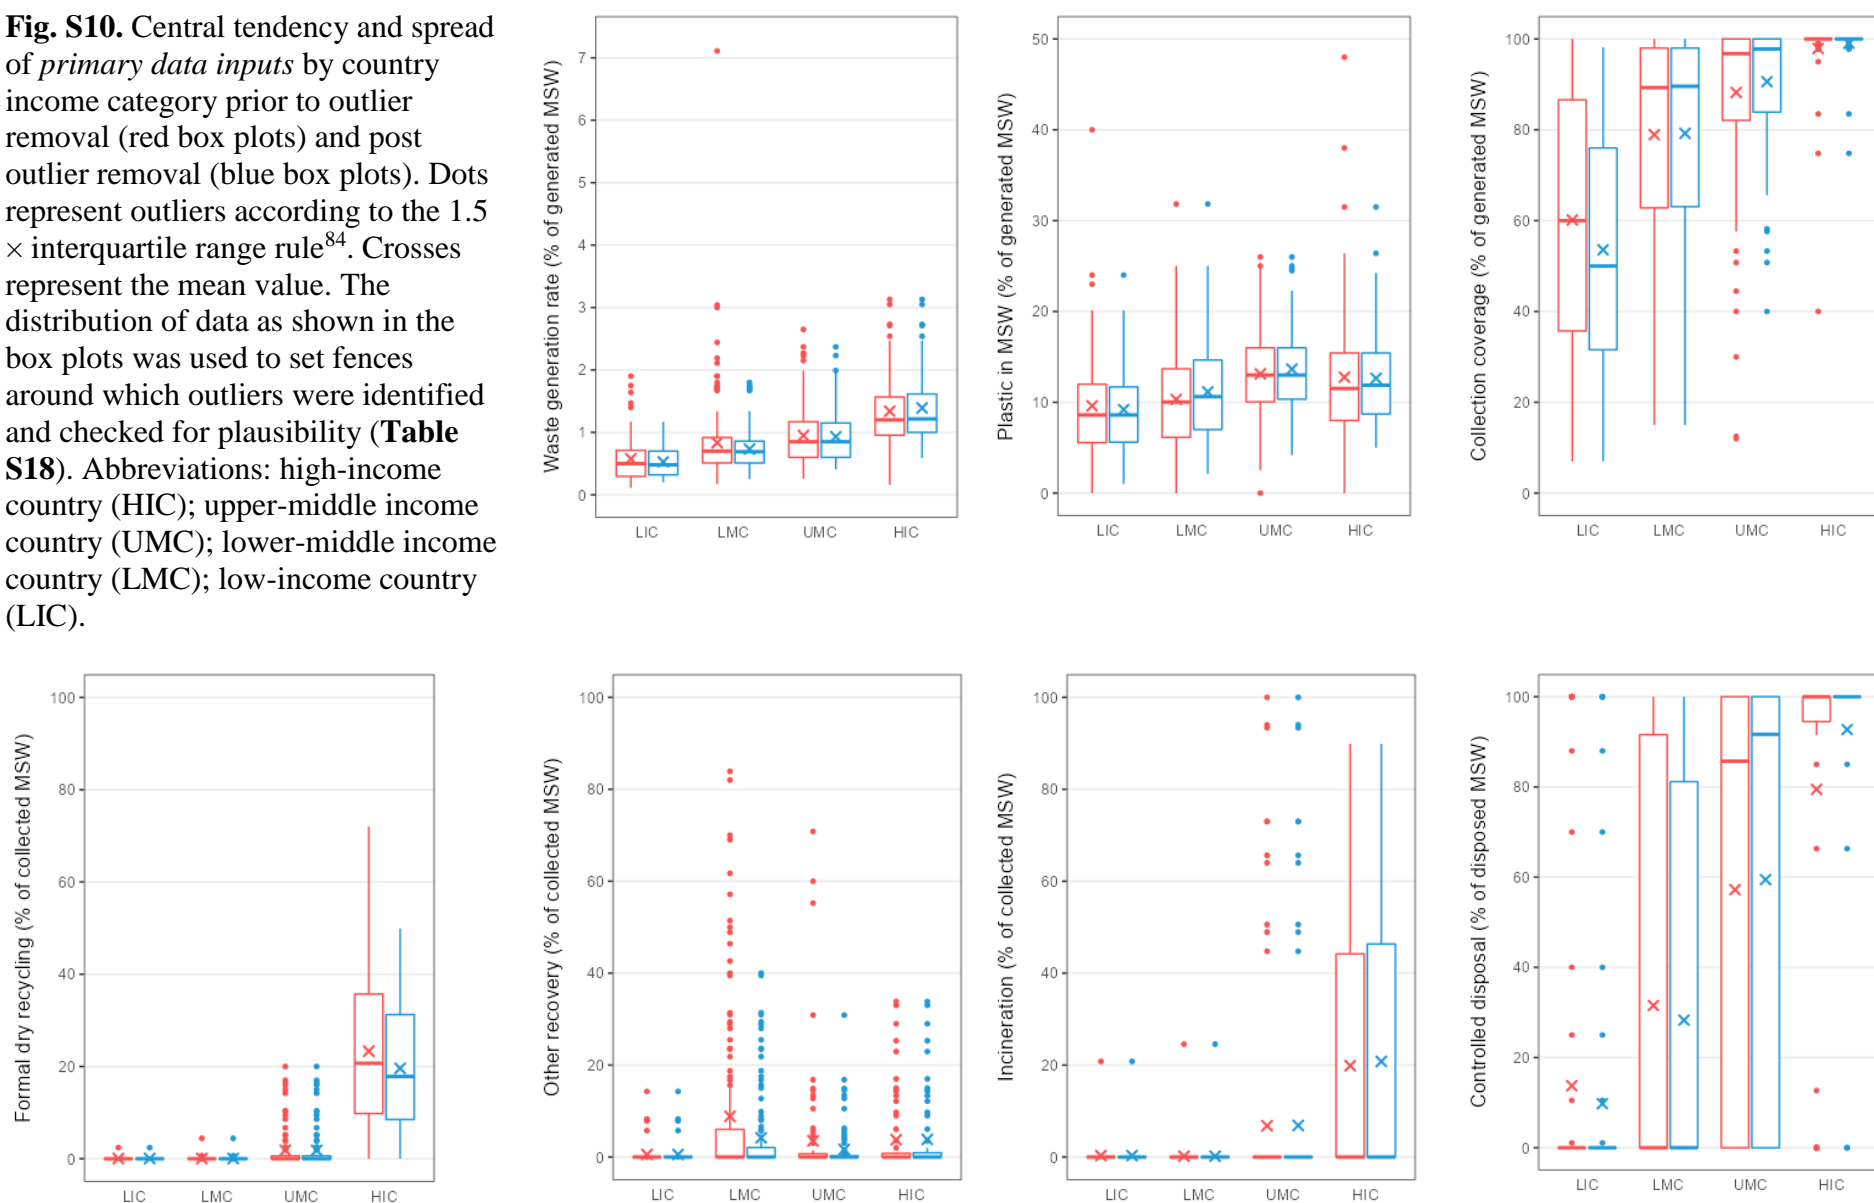

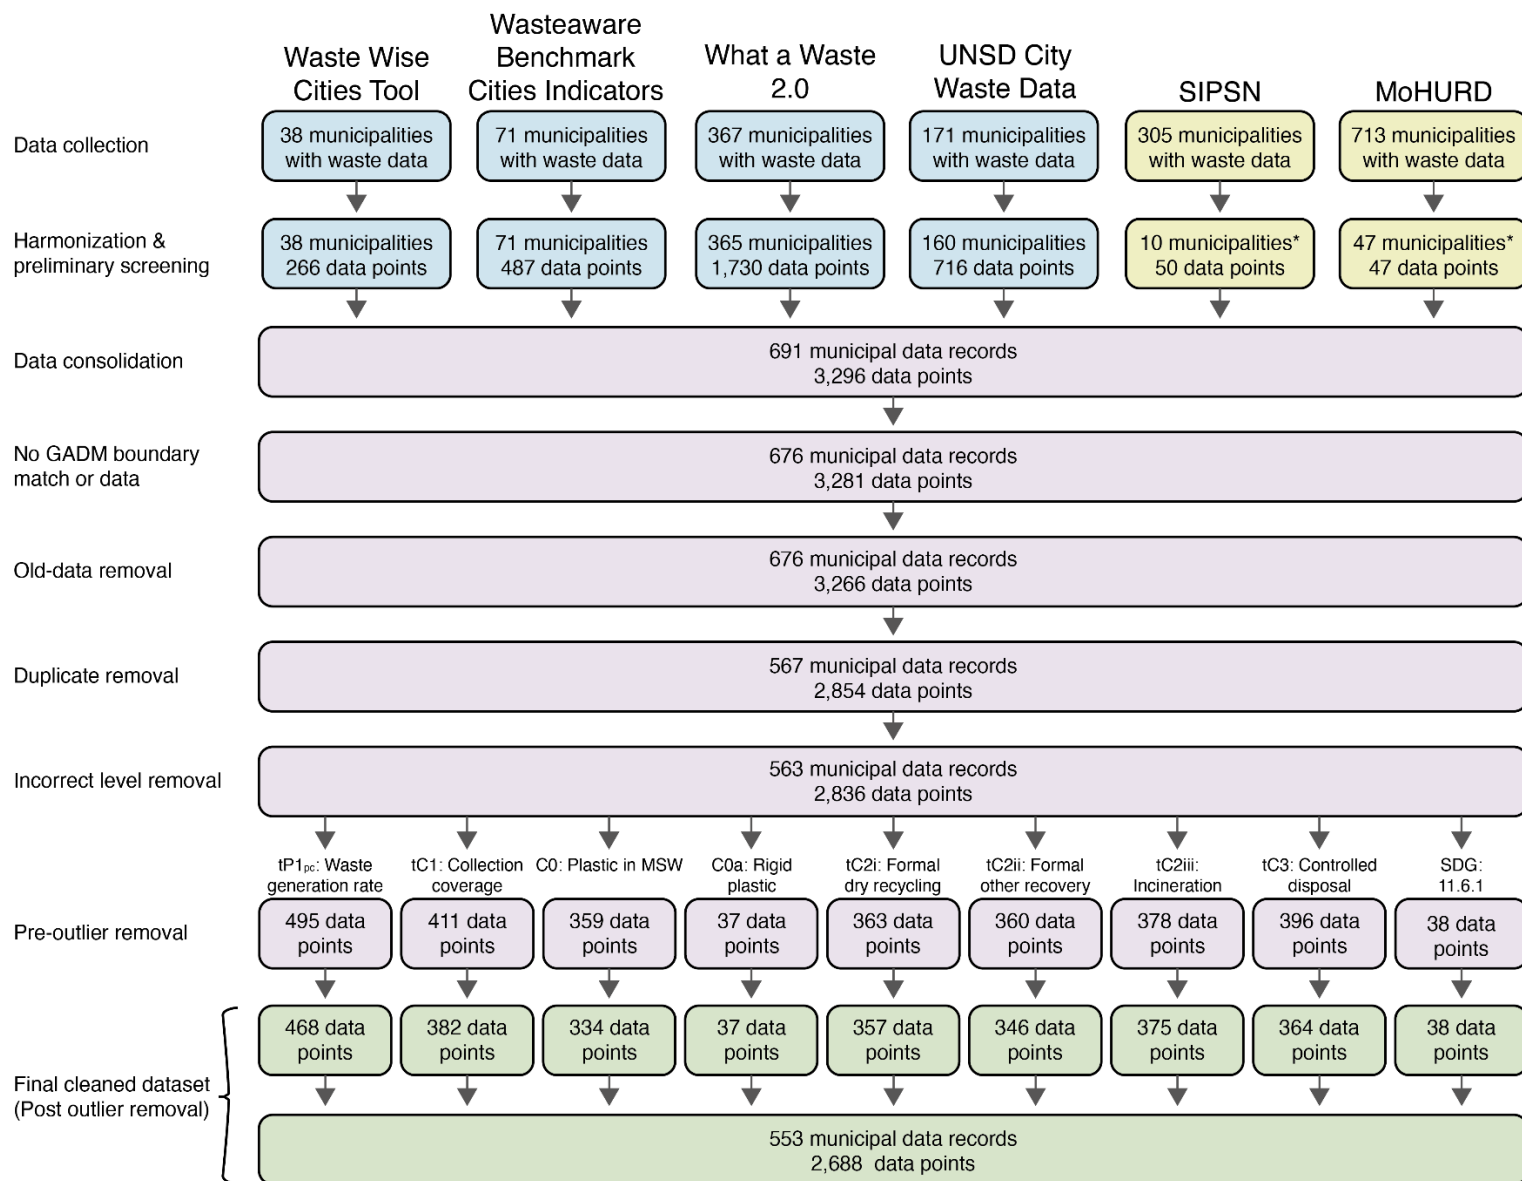

\* Municipal records relate to a subset of sampled municipalities

150 **Fig. S11.** Summary of data collection, consolidation, and cleaning process. Blue and yellow boxes represent harmonisation and preliminary screening  
151 of the raw global and national datasets respectively; purple boxes represent cleaning steps following consolidation of data; and the green boxes  
152 represent the final cleaned dataset (**Supplementary Table 1**).

## S.7 Machine learning for prediction of primary data input variables

We created a new machine learning model to predict data across all global municipalities using our cleaned dataset (**Supplementary Table 1**).

A commonly used method to estimate municipal solid waste management data is to base the prediction on the socioeconomics of the area. Waste generation rate is the most frequently estimated variable with several studies predicting global MSW generation at a country level using regression analysis and with gross domestic product (GDP) as the independent variable<sup>21,30,173</sup>. Others have expanded this further by using more sophisticated machine learning techniques (for example: artificial neural networks, supported vector machine, decision trees, gradient boosted regression trees, and K-nearest neighbours) to arrive at waste generation predictions, although these have so far been restricted to the national scale or below and often for forecasting time-series waste generation for a single location<sup>174-180</sup>.

Aside from MSW generation and composition, very few studies have attempted to assess other aspects of municipal solid waste management performance that relate to the primary inputs in this work (i.e., collection coverage, levels of treatment and recovery, controlled disposal). Lebreton and Andrady<sup>181</sup> used country level data from Waste Atlas<sup>182</sup> (a database of user submitted waste management data, without quality control checks) alongside regression analysis to estimate global plastic waste generation and its mismanagement. ‘Mismanaged plastic waste’ was defined as the waste that goes to ‘unsound disposal’, plus 1% to account for littering. More recently, Velis, et al.<sup>40</sup> demonstrated that variability in cities waste management progress, as measured via Wasteaware Cities Benchmark Indicators, can be modelled by various socio-economic variables using both univariate non-linear regression and multivariate random forest approaches. The variables of waste generation rate, collection coverage, quality of collection services, controlled disposal and environmental protection tested by Velis, et al.<sup>40</sup> are highly relevant to the present work and therefore provide the justification that data gaps can be sufficiently estimated using socioeconomic data (indices) modelled through machine learning approaches.

### S.7.1 Independent variables (MS4a)

Independent variables used for predicting gaps in the *primary data inputs* were initially selected based on those that Velis, et al.<sup>40</sup> had found to show high importance. To enable the in-country variability of solid waste management data to be described, sub-national independent variables were also sourced (**Table S19**) to ensure we had explanatory power across a range of economic, cultural, social, touristic, and geographic factors. We restricted our selection of independent variables for the random forest process to those which had near global coverage to minimise data gaps. With the exception of a few data points of independent variable highlighted in **Table S19**, we chose the nearest reference year for each variable to be as close to 2015 as possible because this is the median year of the cleaned *primary data inputs*.

A global spatial raster of population count data at 100 m resolution was sourced for the year 2020 from the Global Human Settlement Population dataset (GHS-POP)<sup>183</sup>. The zonal statistics tool in QGIS version 3.2.1 was used to sum the population count across each administrative area to calculate the 2020 population for each municipality. This was repeated for data from the year



2015 to assess historical populations of municipalities and allow comparison with the populations provided in older data records when performing the administrative area matching process (**Section S.6.3**). Although population was not used as an independent variable in the machine learning, it was still required to calculate other independent variables such as the number of international annual tourists as a percentage of national population.

**Table S19.** Independent variables and their properties.

| Category                        | Variable                                                       | Unit                                         | Format         | Year  | Type        | Scale  | Resolution                    | Ref.    |
|---------------------------------|----------------------------------------------------------------|----------------------------------------------|----------------|-------|-------------|--------|-------------------------------|---------|
| Economic                        | GDP per capita                                                 | GDP per capita PPP in constant 2011 int. USD | Spatial raster | 2015  | Continuous  | Global | Subnational (5 arc-min)       | 184     |
|                                 | Human development index (HDI)                                  | -                                            | Spatial raster | 2015  | Continuous  | Global | Subnational (5 arc-min)       | 184,185 |
|                                 | Gross National Income (GNI) Per Capita, Atlas Method           | Current US\$                                 | Excel          | 2015* | Continuous  | Global | National                      | 186     |
|                                 | Income category                                                | -                                            | Excel          | 2015  | Categorical | Global | National                      | 85      |
|                                 | Developing country                                             | Y/N                                          | Excel          | 2015  | Categorical | Global | National                      |         |
|                                 | Small island developing country                                | Y/N                                          | Excel          | 2015  | Categorical | Global | National                      |         |
| Demographic / Social / Cultural | Population density (unconstrained UN-adjusted)                 | People·km <sup>-2</sup>                      | Spatial raster | 2015  | Continuous  | Global | Subnational (30 arc seconds)  | 187     |
|                                 | Corruption Perceptions Index (CPI)                             | -                                            | Excel          | 2015* | Continuous  | Global | National                      | 188     |
|                                 | Social Progress Index (SPI)                                    | -                                            | Excel          | 2015  | Continuous  | Global | National                      | 189     |
| Touristic                       | International tourist arrivals as % of population (calculated) | People                                       | Excel          | 2015* | Continuous  | Global | National                      | 190     |
| Geographic                      | Major city                                                     | Y/N                                          | Spatial vector | NA    | Categorical | Global | Subnational                   | 191     |
|                                 | Sub-region                                                     | -                                            | Excel          | NA    | Categorical | Global | National                      | 192     |
|                                 | Degree of Urbanisation                                         | -                                            | Spatial vector | 2015  | Categorical | Global | Subnational (municipal level) | 193     |

\* Or nearest year to 2015 (up to three years away) if country data point not available for 2015.

We classified each default municipality to characterise its level of urbanisation according to the Global Human Settlement Global Degree of Urbanisation Classification of administrative units (GHS-DUC) methodology<sup>194</sup>. The GHS-DUC provides classification for administrative areas according to two levels. Level 1 includes three classes represented by a numeric ID: (1) rural; (2) town/semi-dense area; and (3) city. Level 2 includes eight classes: (30) city; (23) dense town; (22) semi-dense town; (21) suburban / peri-urban; (13) village; (12) dispersed rural area; (11) mostly uninhabited area; and (10) water.

The GHS-DUC is not available for GADM V3.6 (the version used here), so we applied the GHS-DU-TUC toolkit<sup>193</sup> to calculate urbanisation (for Level 1 and 2) for our own default municipality vectors using the GHS Settlement Model grid (GHS-SMOD)<sup>195</sup> and GHS-POP raster<sup>183</sup> for the years 2015 and 2020.

The Level 1 categorical classifications were used as an independent variable in our machine learning. The Level 2 classifications were used to calculate the proportion of the population that lives each settlement typology in each municipality using the GHS-DU-TUC toolkit<sup>193</sup>. The rural classes (10-13) were combined into a single ‘Rural\_share’ category. The population in the Rural\_share category and all of the other Level 2 classes were used to calculate street sweeping efficiency (Section S.8.5.2) and the Rural\_share alone was used to correct data for rurality (Section S.9.1.2).

We also used several other sub-national independent variables to train the random forest model including: sub-national GDP per capita (PPP in constant 2011 international USD) and subnational human development index (HDI) for the latest available year of 2015 as per Kummu, et al.<sup>184</sup>. Additionally, sub-national HDI data was also obtained from Smits and Permanyer<sup>185</sup> for the year 2015 to fill any data gaps in Kummu, et al.<sup>184</sup>. Likewise, population density per km<sup>2</sup> for the year 2015 was further obtained from WorldPop<sup>187</sup>. Each of these independent variables was in raster form therefore the value for each municipality was summarised as the mean value, calculated using the QGIS zonal statistics tool.

Data on whether a municipality was a capital city, world city, or mega city was sourced from the Natural Earth populated places dataset<sup>191</sup>. These were aggregated into one overall indicator termed here ‘major city’ to reduce the number of independent variables and avoid overly correlated variables as this can impact the measure of variable importance via the permutation method<sup>196</sup>.

In addition to the sub-national independent variables, national level independent variables were allocated to each municipality using their ISO3 country code<sup>197</sup> as detailed in **Table S19**. The international annual tourist arrivals were calculated as a percentage of the national population as determined from GHS-POP.

## **S.7.2 Imputation of independent variables (MS4b)**

Occasionally, independent variables were not available for some administrative areas. At national level this was mainly because the World Bank does not recognise certain countries included in GADM (e.g., Taiwan, Kosovo), or does not report data for them (e.g., Small Island Developing States), but also because some data are not collated and published (e.g., international touristic arrivals). Any omissions in an independent variable were small, accounting for 2% of all administrative areas or less.

The random forest process described in **Section S.7.3** requires a complete set of independent variables with no data gaps. Therefore, missing values were imputed using predictive mean matching (pmm) method implemented with the R package ‘MICE’ (version 3.14.0). We used the mean of five iterations, however when the imputed values for national level independent variables differed for the same country, we used the median to ensure consistency within a country.

## **S.7.3 Quantile regression random forest (MS5a and MS5b)**

Random forest is a supervised machine learning method developed by Breiman<sup>198</sup>. A random forest is an ensemble of decision trees whereby each tree is grown from a bagged version of the

training dataset and the predictor variables used for splitting are selected at random at each node of the decision tree. In regression problems, the predictions are the average of the response of each tree, whereas in classification problems the majority result is taken.

Since its development, random forest has been used extensively for both classification and regression problems due to their wide suitability, simplicity, ability to deal with small sample sizes, minimal requirement for tuning and reduced risk of overfitting<sup>198,199</sup>. It has also recently been used for modelling solid waste management indices by Velis, et al.<sup>40</sup> who found that it outperformed non-linear regression models in all but one indicator.

Potential drawbacks of random forest regression are that they can be computationally demanding; do not allow for extrapolation outside of the training data range; that variable importance metrics can be unreliable when dealing with highly correlated predictors; and that important information on the distribution of responses is neglected when the mean value of responses is taken<sup>200-202</sup>. To overcome this last disadvantage, Meinshausen<sup>200</sup> developed a variant of the random forest model originally presented by Breiman<sup>198</sup> whereby the value of all responses is retained, rather than just the mean. Termed ‘quantile regression forests’, the comprehensive retention of this information allows the distribution of responses to be expressed as quantiles, and therefore the uncertainty around predictions quantified. Quantification of uncertainty around *primary input* data predictions was used in this work by feeding it into the Monte Carlo probabilistic material flow analysis (**Section S.9**).

We implemented quantile regression random forest independently for each of the seven *primary input variables* in R using the package ‘caret’ (version 6.0-92). Twelve imputed independent variables shown in **Table S19** were used as the predictor variables. Hyperparameters of the random forest process include the number of trees in the forest (*ntree*), the number of input features to randomly sample at each split (*mtry*) and the minimum number of observations in a terminal node (*min.node.size*). Probst, et al.<sup>203</sup> performed a literature review on the impact of these parameters on the performance of random forest and concluded that *mtry* is the most important parameter to tune, whereas *ntree* should be set high, but has diminishing value as more trees are added.

To limit potential overfitting and reliably estimate the predictive ability of the random forest models, the dataset was initially split into a training and test dataset (80:20) using the *caret* function *createDataPartition*. Training data was then used to tune the hyperparameters using grid search with 10-fold cross validation and five repeats. Hyperparameters tested were *mtry* between 1 and 12 (the maximum number of predictors), and *min.node.size* between 5 and 10. The number of trees *ntree* was kept constant at the default of 500 trees. Suitability of the random forest models in the tuning process were assessed by calculating the root mean squared error (RMSE), with the optimal model for each dependent variable chosen as the one where RMSE was minimised. The optimised model was then used to predict the unseen test dataset and again the RMSE was calculated. Similar values of RMSE between the cross-validation and testing data signified that the model was not overfitting (**Table S20**). Finally, once the error and overfitting checks were considered acceptable, the random forest model was retrained on the full dataset using the optimum hyperparameters. This process was repeated for each of the dependent *primary input variables*.

**Table S20.** Results of hyperparameter optimisation including optimum model parameters and root mean squared error (RMSE) values from cross-validation and testing on a holdout dataset.

| ID                | Variable                                    | Unit                                         | Optimum model parameters |               | Input data range |       | Cross validation RMSE* | Test data RMSE |
|-------------------|---------------------------------------------|----------------------------------------------|--------------------------|---------------|------------------|-------|------------------------|----------------|
|                   |                                             |                                              | mtry                     | min.node.size | Min              | Max   |                        |                |
| tP1 <sub>pc</sub> | MSW generation rate                         | kg·cap <sup>-1</sup> ·d <sup>-1</sup>        | 3                        | 5             | 0.2              | 3.13  | 0.32                   | 0.37           |
| C0                | Plastic in MSW                              | % wt. of MSW generated                       | 1                        | 7             | 1.0              | 31.8  | 4.78                   | 5.29           |
| tC1               | Collection coverage                         | % wt. of MSW generated                       | 4                        | 5             | 7.0              | 100.0 | 15.47                  | 13.84          |
| tC2i              | Formal collection of MSW for dry recycling  | % wt. of formally collected MSW              | 2                        | 10            | 0.0              | 49.9  | 6.07                   | 5.95           |
| tC2ii             | Formal collection of MSW for other recovery | % wt. of formally collected MSW              | 1                        | 5             | 0.0              | 40.0  | 6.46                   | 5.26           |
| tC2iii            | Formal collection of MSW for incineration   | % wt. of formally collected MSW              | 3                        | 6             | 0.0              | 100.0 | 12.97                  | 11.76          |
| tC3               | Controlled disposal of MSW                  | % wt. of formally collected MSW for disposal | 2                        | 7             | 0.0              | 100.0 | 35.38                  | 34.92          |

\* Of optimal model from cross-validation. Abbreviations: municipal solid waste (MSW).

The performance of random forest was assessed using the RMSE values presented in **Table S20**. Given RMSE has the same units as the dependent variable, the range of input data for each variable is also provided for comparison. Alternate metrics, such as the mean absolute percentage error (MAPE) or the symmetric mean absolute percentage error (SMAPE), were avoided because much of the data includes zeros, or values close to zero, and these metrics are known to become undefined or unstable respectively in these cases<sup>204</sup>. RMSE values were further compared to the RMSE values reported by Velis, et al.<sup>40</sup> for the comparable variables of waste generation rate (0.31 adjusted to kg·cap<sup>-1</sup>·d<sup>-1</sup>), collection coverage (10.17) and controlled disposal (27.96). The RMSE values in the present work are broadly comparable to those achieved by Velis, et al.<sup>40</sup>, albeit slightly higher. It should be noted, however, that the Velis, et al.<sup>40</sup> analysed a limited dataset from a single primary data generating methodology (WABI), consisting of only 40 cities (maximum), and as such, their dataset was not tested on a holdout dataset and is therefore more at risk of overfitting. Likewise, the dataset used in this work is much larger than that used in Velis, et al.<sup>40</sup>. Although this is useful for improved learning by random forest, it is also likely to exhibit higher levels of noise, especially as it was collated from multiple sources (WaCT, WABI, WaW2.0, UNSD, SIPSN, MoHURD), despite efforts to compatibilize them (**Section S.6**).

The RMSE values presented in **Table S20** were considered acceptable for use in this work, especially given the wide range, noise and complexity of the waste management data that it predicts. Controlled disposal had the worst predictive capability with an RMSE of 35%, however, given its bimodal nature, the method for predicting controlled disposal was adapted to be treated as a classification problem rather than a regression one, as discussed in **Section S.9.1.1**.

Whilst the economic independent variables score highly for importance across all dependent variables, in many cases it is the social, cultural, or touristic independent variables that show the highest importance (**Fig. S12**). This signifies that models that only use GDP or other economic metrics for prediction are perhaps excluding other important metrics.

Waste generation rate (tP1<sub>pc</sub>)

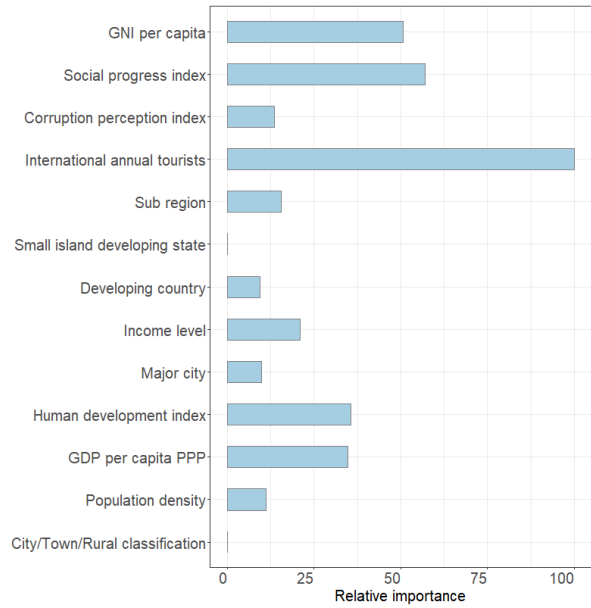

Plastic in MSW (C0)

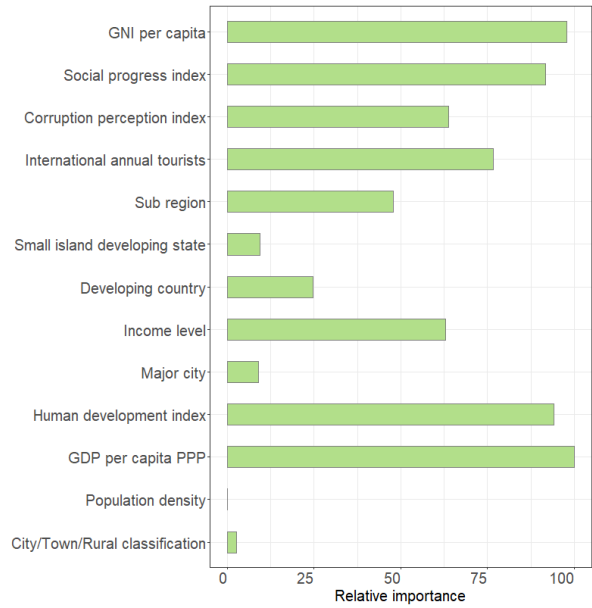

Collection coverage (tC1)

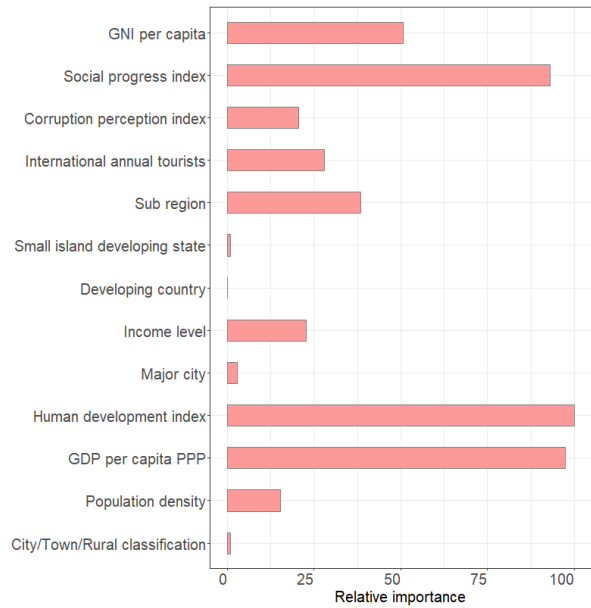

Formal dry recycling (tC2i)

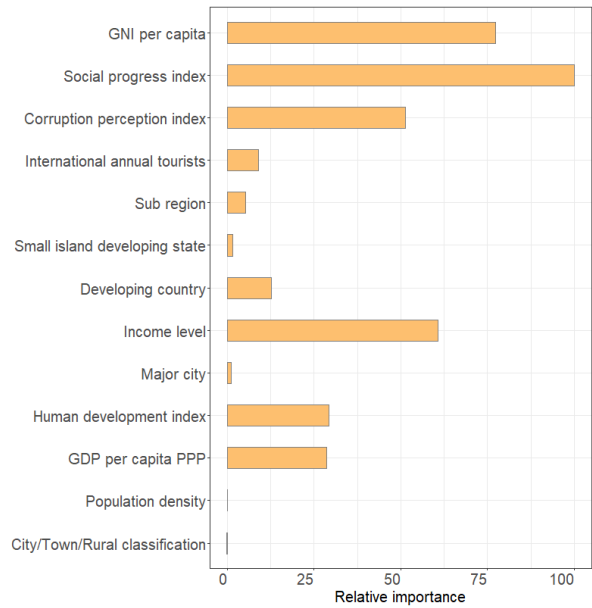

Other recovery (tC2ii)

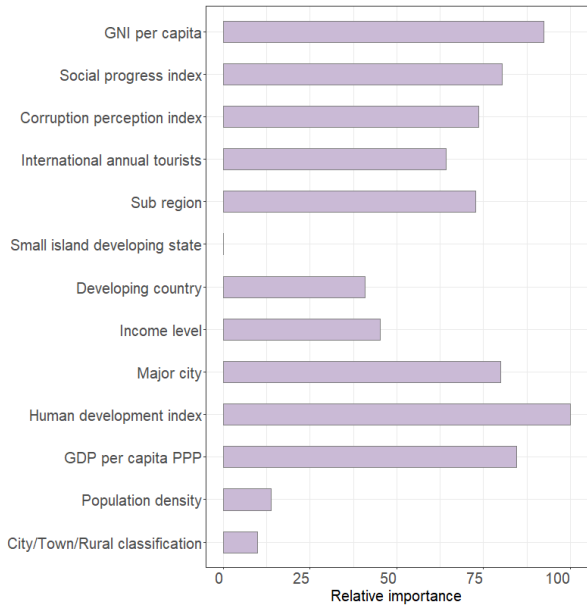

Incineration (tC2iii)

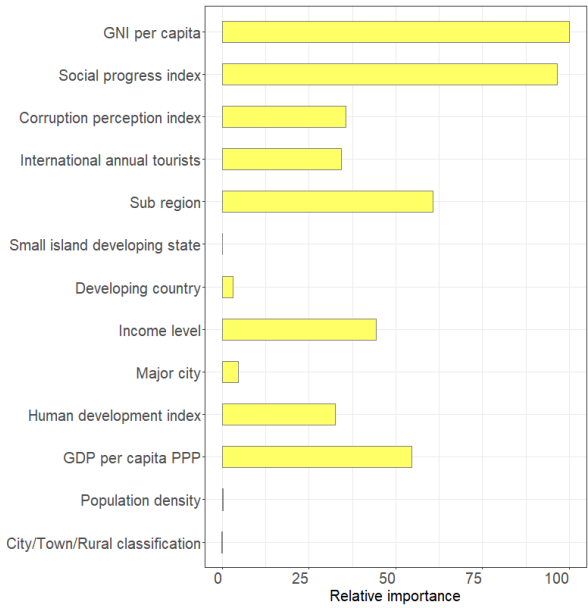

Controlled disposal (tC3)

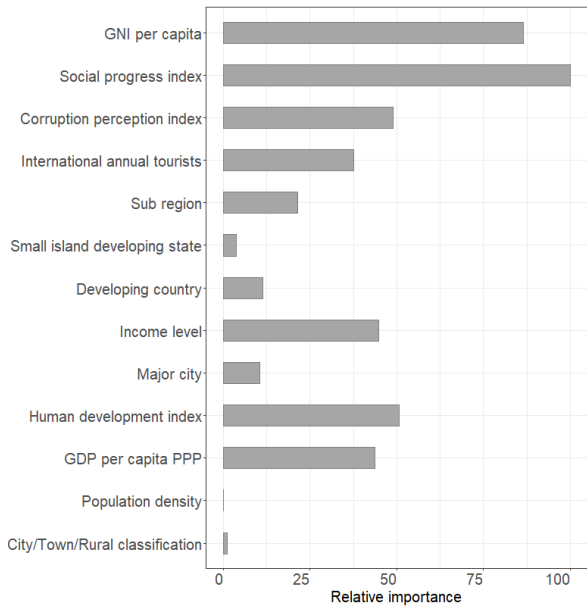

**Fig. S12.** Relative importance measure for each dependent variable as determined through the permutation method in quantile regression random forest.

## S.8 Secondary data collection and processing (MS6)

In addition to the *primary data inputs* used to populate the *Tributary MFA*, secondary data was required to complete the more detailed *Full MSW MFA* and *Plastics MFA*. These secondary inputs build upon the *Tributary MFA* and enable three key areas to be explored in more detail, namely:

1. Converting MSW flows to plastic and rigid plastic flows at the *Tributary MFA* system ends.
2. Allowing further description of the formal and informal recycling processes.
3. Estimating emissions of plastic into the environment at specific parts of the system, including both debris emissions and open burning emissions.

Municipalities rarely report on the *secondary data inputs*, and in some cases, such as emissions of plastic from different parts of the solid waste management system, no reliably measured data yet exists. These data limitations mean that it was not possible to collate a database of *secondary data inputs* per municipality as done with the *primary data inputs*. Instead, available data is summarised either by archetypes (e.g., based on the income category of the country), or by modelling approaches.

Material flow analysis calculations in this work used a probabilistic approach based on Monte Carlo Analysis (**Section S.9**). This relies on the variability of each data input being specified in the form of a probability density function (PDF). Quantile regression random forest enabled the *primary data inputs* to be specified as PDFs (**Section S.7.3**), however, for the *secondary data inputs* different approaches were used, as detailed below.

### S.8.1 Proportion of plastic that is rigid (C0a)

The ratio of rigid to flexible plastic at different points of the system helps to determine the probability of material being emitted from different system components through the action of wind and surface water and in subsequent terrestrial transport models. In the absence of reliable measured data, we assume that the ratio of rigid to flexible plastic in waste generated is equivalent to C12a, C13a, C17a, C18a and C22a. For LICs, LMCs, and UMCs, the WaCT<sup>29</sup> provides verifiable, quality checked data for 37 municipalities which we used to approximate these proportions as normal distributions (**Table S21**). Due to only four data points being available for LICs, these were combined with LMC data.

**Table S21.** Proportion of rigid format material in upper-middle (UMC) and lower-middle / low income (LMC / LIC) countries based on household surveys from WaCT<sup>29</sup>.

| Income category | Number of data points | Rigid plastic<br>(% wt. of plastic generation) |                    |
|-----------------|-----------------------|------------------------------------------------|--------------------|
|                 |                       | Mean                                           | Standard deviation |
| UMC             | 7                     | 44.4                                           | 3.9                |
| LMC / LIC       | 30                    | 41.8                                           | 10.3               |

For HICs, we used a normal distribution based on the mean (61.7%) and standard deviation (8.7%) of composition data from five sources which reported on approximately the same basis (**Table S22**).

**Table S22.** Proportion of rigid and flexible format material in selected high-income countries.

| Source                                   | Geographical context | Data type | Method                 | Basis | Rigid<br>(% wt.) | Flexible<br>(% wt.) |
|------------------------------------------|----------------------|-----------|------------------------|-------|------------------|---------------------|
| Chruszcz <sup>205</sup>                  | Wales                | Primary   | Waste characterisation | MSW   | 63.6             | 36.4                |
| Bridgwater, et al. <sup>206</sup>        | England              | Secondary | Synthesis              | HH    | 64.0             | 36.0                |
| Cascadia Consulting Group <sup>207</sup> | California           | Primary   | Waste characterisation | MSW*  | 60.9             | 39.1                |

| Source                             | Geographical context | Data type | Method                 | Basis | Rigid (% wt.) | Flexible (% wt.) |
|------------------------------------|----------------------|-----------|------------------------|-------|---------------|------------------|
| BMK <sup>208</sup>                 | Austria              | Secondary | Not stated             | MSW*  | 72.0          | 28.0             |
| Tetra Tech EBA Inc. <sup>209</sup> | Vancouver            | Primary   | Waste characterisation | MSW   | 48.1          | 51.9             |
| <b>Mean</b>                        |                      |           |                        |       | <b>61.7</b>   | <b>38.3</b>      |
| <b>Median</b>                      |                      |           |                        |       | <b>63.6</b>   | <b>36.4</b>      |
| <b>Standard deviation</b>          |                      |           |                        |       | <b>8.7</b>    | <b>8.7</b>       |

\* Although it was not specifically described as municipal solid waste (MSW), we assumed it based on the context and narrative in the study report. Abbreviations: Municipal solid waste (MSW); household waste (HH).

## S.8.2 Informal sector recycling (P14)

A sub-model was developed to estimate the amount of waste collected by the informal recycling sector (IRS) (P14) worldwide (**Fig. S13**), based on a two-stage process originally developed by Lau, et al.<sup>5</sup>: (1) Estimate the number of informal recyclers in each area; and (2) Estimate the productivity of those recyclers, and hence how much waste they collect and reclaim for recycling.

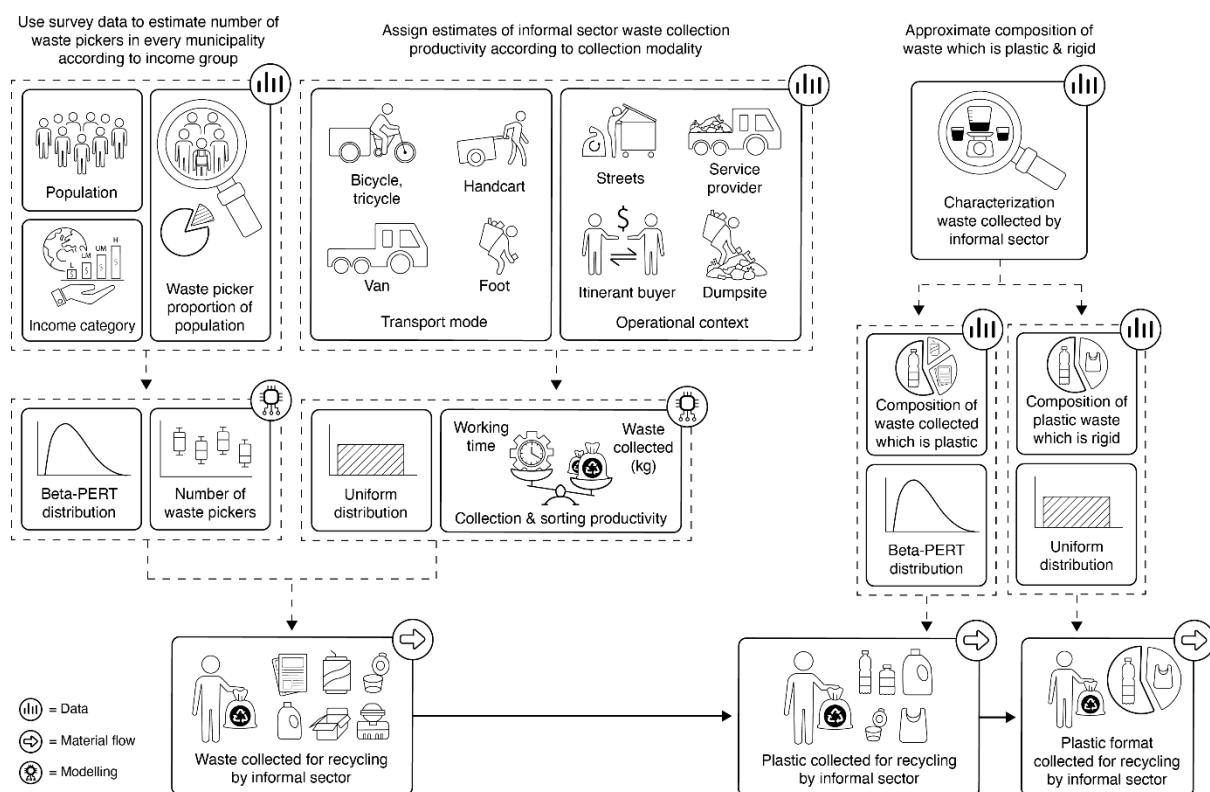

**Fig. S13.** Sub model used to estimate the quantity of plastic collected for recycling by the informal recycling sector.

### S.8.2.1 Informal recycling sector population

Estimates for the proportion of informal recyclers in the urban populations of 102 municipalities and countries around the world were collated (**Table S23**) and categorised by World Bank income category (**Fig. S14**).



1375 **Table S23.** Population engaged in informal waste collection as a proportion of total urban  
1376 population in cities and countries.

| ISO3 | Country      | Income category | Municipality                 | Proportion of waste pickers in urban population | Source |
|------|--------------|-----------------|------------------------------|-------------------------------------------------|--------|
| BRA  | Brazil       | UMC             | Sorocaba                     | 0.194                                           | 92     |
| IDN  | Indonesia    | LMC             | Jakarta                      | 0.378                                           | 210    |
| BRA  | Brazil       | UMC             |                              | 0.192                                           | 211    |
| BRA  | Brazil       | UMC             | Esteio                       | 0.186                                           | 212    |
| ZAF  | South Africa | UMC             |                              | 0.136                                           | 213    |
| PHL  | Philippines  | LMC             | Metro Manila                 | 0.156                                           | 214    |
| PHL  | Philippines  | LMC             | Quezon City                  | 0.072                                           |        |
| ARG  | Argentina    | HIC             | Rauch                        | 0.233                                           | 215    |
| PAK  | Pakistan     | LMC             | Lahore                       | 0.188                                           |        |
| PAK  | Pakistan     | LMC             | Lahore (UC 16)               | 0.189                                           | 216    |
| IND  | India        | LMC             | Tiruchirappalli              | 0.021                                           |        |
| CHN  | China        | UMC             | Urban Area                   | 0.668                                           | 26     |
| CHN  | China        | UMC             | Beijing                      | 1.373                                           |        |
| CHN  | China        | UMC             | Guangzhou                    | 1.159                                           |        |
| CHN  | China        | UMC             | Shenzhen                     | 2.179                                           |        |
| CHN  | China        | UMC             | Suzhou                       | 1.482                                           |        |
| CHN  | China        | UMC             | Wuhan                        | 0.262                                           |        |
| MNG  | Mongolia     | LMC             | Ulaanbaatar                  | 0.757                                           |        |
| IND  | India        | LMC             | Urban Area                   | 0.412                                           |        |
| IND  | India        | LMC             | Ahmedabad                    | 0.675                                           |        |
| IND  | India        | LMC             | Amritsar                     | 0.281                                           |        |
| IND  | India        | LMC             | Bangalore                    | 0.708                                           |        |
| IND  | India        | LMC             | Delhi                        | 1.280                                           |        |
| IND  | India        | LMC             | Kanpur                       | 0.615                                           |        |
| IND  | India        | LMC             | Kolkata                      | 0.511                                           |        |
| IND  | India        | LMC             | Mumbai                       | 0.694                                           |        |
| IND  | India        | LMC             | Pune                         | 0.248                                           |        |
| IDN  | Indonesia    | LMC             | Bandung                      | 0.133                                           |        |
| IDN  | Indonesia    | LMC             | Jakarta                      | 0.224                                           |        |
| PHL  | Philippines  | LMC             | Manila                       | 0.191                                           |        |
| PHL  | Philippines  | LMC             | Quezon City                  | 0.485                                           |        |
| BGD  | Bangladesh   | LMC             | Dhaka                        | 0.133                                           |        |
| PAK  | Pakistan     | LMC             | Lahore and Allama Iqbal Town | 0.333                                           |        |
| VNM  | Vietnam      | LMC             | Ho Chi Minh City             | 0.338                                           |        |
| KHM  | Cambodia     | LMC             | Phnom Penh                   | 0.134                                           |        |
| MEX  | Mexico       | UMC             | Mexico City                  | 0.121                                           |        |
| MEX  | Mexico       | UMC             | Monterrey                    | 0.038                                           |        |
| PER  | Peru         | UMC             | Urban Area                   | 0.441                                           |        |
| PER  | Peru         | UMC             | Callao                       | 0.178                                           |        |
| PER  | Peru         | UMC             | Canete                       | 0.358                                           |        |
| PER  | Peru         | UMC             | Lima                         | 0.186                                           |        |
| BRA  | Brazil       | UMC             | Urban Area                   | 0.364                                           |        |
| BRA  | Brazil       | UMC             | Belo Horizonte               | 0.157                                           |        |
| BRA  | Brazil       | UMC             | Rio de Janeiro               | 1.301                                           |        |

| ISO3 | Country          | Income category | Municipality                   | Proportion of waste pickers in urban population | Source |
|------|------------------|-----------------|--------------------------------|-------------------------------------------------|--------|
| BRA  | Brazil           | UMC             | Santo Andre                    | 0.303                                           |        |
| BRA  | Brazil           | UMC             | Sao Paulo                      | 0.177                                           |        |
| COL  | Colombia         | UMC             | Bogota                         | 0.252                                           |        |
| ARG  | Argentina        | HIC             | Buenos Aires                   | 0.222                                           |        |
| URY  | Uruguay          | HIC             | Montevideo                     | 0.907                                           |        |
| ETH  | Ethiopia         | LIC             | Addis Ababa                    | 0.204                                           |        |
| EGY  | Egypt, Arab Rep. | LMC             | Cairo                          | 0.321                                           |        |
| TZA  | Tanzania         | LIC             | Dar-es-Salaam                  | 0.024                                           |        |
| ZMB  | Zambia           | LMC             | Lusaka                         | 0.039                                           |        |
| ROU  | ROMANIA          | UMC             | Cluj-Napoca                    | 1.044                                           |        |
| GHA  | Ghana            | LMC             | Accra metropolitan area (GAMA) | 0.031                                           | 217    |
| MEX  | Mexico           | UMC             | Monterrey                      | 0.033                                           |        |
| MEX  | Mexico           | UMC             | Guadalupe                      | 0.087                                           |        |
| MEX  | Mexico           | UMC             | San Nicolas                    | 0.040                                           |        |
| MEX  | Mexico           | UMC             | Mexico City                    | 0.100                                           | 218    |
| MEX  | Mexico           | UMC             | Tultitlán                      | 4.564                                           |        |
| MEX  | Mexico           | UMC             | Nezahualcóyotl                 | 0.055                                           |        |
| MEX  | Mexico           | UMC             | Tultepec                       | 0.026                                           |        |
| BRA  | Brazil           | UMC             | Santo Andre                    | 0.303                                           | 219    |
| BRA  | Brazil           | UMC             |                                | 0.114                                           | 220    |
| SRB  | Serbia           | UMC             |                                | 0.339                                           | 221    |
| BRA  | Brazil           | UMC             |                                | 0.303                                           | 222    |
| MEX  | Mexico           | UMC             | Celaya                         | 0.422                                           | 223    |
| CHL  | Chile            | HIC             | Santiago de Chile              | 0.111                                           | 224    |
| NIC  | Nicaragua        | LMC             | Managua                        | 0.117                                           | 225    |
| GHA  | Ghana            | LMC             | Kpone Katamanso District       | 0.143                                           | 226    |
| IND  | India            | LMC             | Mumbai                         | 1.206                                           | 227    |
| PAK  | Pakistan         | LMC             | Halimar Town                   | 0.037                                           | 228    |
| PRY  | Paraguay         | UMC             | Asunción                       | 0.096                                           | 229    |
| IND  | India            | LMC             | Pune                           | 0.028                                           | 230    |
| PAK  | Pakistan         | LMC             | Al Ima Iqbal Town              | 0.333                                           | 231    |
| BGD  | Bangladesh       | LMC             | Khulna                         | 0.134                                           | 232    |
| NGA  | Nigeria          | LMC             | Lagos                          | 0.063                                           | 233    |
| EGY  | Egypt, Arab Rep. | LMC             | Cairo                          | 0.227                                           |        |
| ROU  | ROMANIA          | UMC             | Cluj                           | 0.849                                           |        |
| PER  | Peru             | UMC             | Lima                           | 0.227                                           | 234    |
| ZMB  | Zambia           | LMC             | Lusaka                         | 0.039                                           |        |
| IND  | India            | LMC             | Pune                           | 0.295                                           |        |
| PHL  | Philippines      | LMC             | Quezon                         | 0.406                                           |        |
| IDN  | Indonesia        | LMC             | Bandung                        | 0.129                                           | 235    |
| COL  | Colombia         | UMC             |                                | 0.290                                           | 236    |
| VNM  | Vietnam          | LMC             | Hanoi                          | 0.136                                           | 237    |
| IND  | India            | LMC             | Kanpur                         | 0.226                                           | 238    |
| IND  | India            | LMC             | Calcutta                       | 0.167                                           |        |
| PHL  | Philippines      | LMC             | Manila                         | 0.128                                           | 239    |
| MEX  | Mexico           | UMC             | Mexico City                    | 0.088                                           |        |

| ISO3 | Country     | Income category | Municipality                     | Proportion of waste pickers in urban population | Source |
|------|-------------|-----------------|----------------------------------|-------------------------------------------------|--------|
| ZWE  | Zimbabwe    | LIC             | Harare                           | 0.084                                           | 240    |
| ZWE  | Zimbabwe    | LIC             | Bulawayo                         | 0.296                                           |        |
| IND  | India       | LMC             | New Delhi                        | 0.106                                           | 241    |
| BGD  | Bangladesh  | LMC             | Dhaka                            | 0.973                                           | 242    |
| BRA  | Brazil      | UMC             | Metropolitan region of São Paulo | 0.094                                           | 243    |
| IND  | India       | LMC             |                                  | 0.514                                           | 244    |
| PHL  | Philippines | LMC             | Iloilo City                      | 0.060                                           | 245    |
| BGD  | Bangladesh  | LMC             | Rajshahi City                    | 0.156                                           | 246    |
| CHN  | China       | UMC             | Beijing-Haidian District (North) | 0.757                                           | 247    |
| CHN  | China       | UMC             | Urban Area                       | 0.668                                           | 248    |
| CHN  | China       | UMC             | Beijing (North)                  | 0.073                                           | 249    |
| CHN  | China       | UMC             | Cities in China                  | 0.455                                           | 250    |

1377

1378 We assumed a Beta-PERT distribution for the informal recycling sector population data with a  
1379 default shape factor of four<sup>251</sup>. The shape factor controls the weighting of the most likely value.  
1380 We chose the Beta-PERT distribution for two reasons: (1) Beta-PERT distributions require only  
1381 three, easily obtainable parameters (minimum plausible value, most likely value, maximum  
1382 plausible value), and are therefore suitable in situations where the available data are not  
1383 sufficient to provide a more accurate distribution shape or when parameters rely on expert  
1384 judgement; and (2) Beta-PERT distributions overcome some of the disadvantages of the  
1385 triangular distribution, often favoured in such situations, because triangular distributions assign  
1386 higher probabilities to the extremities of fat-tailed distributions<sup>252</sup>.

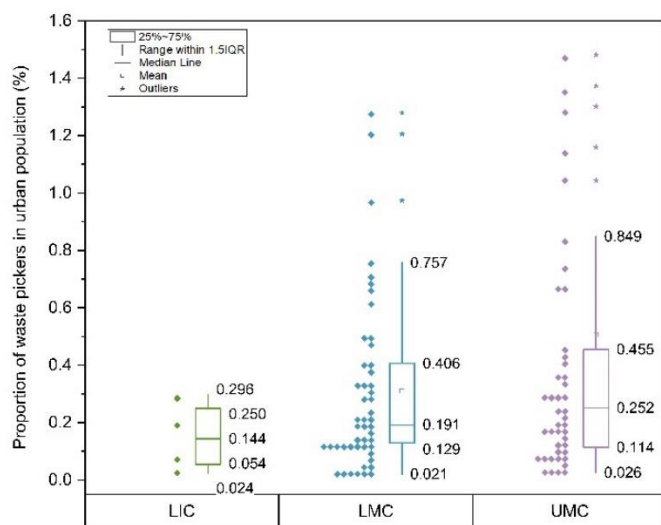

1387

1388 **Fig. S14.** Central tendency and spread of estimated proportion of waste pickers in municipalities  
1389 and countries (n = 102).

1390 Informal recycling sector population data were grouped by income category (**Fig. S14**). For the  
1391 LICs, LMCs and UMCs, the most likely value was taken as the median, and the lower and upper  
1392 plausible limits were taken as the range of values excluding outliers, defined as being greater

than 1.5 times the inter-quartile range distance from each quartile. Four data points were available for HICs, all for countries in South America (Argentina, Chile and Uruguay) which, at the time the data were collected, had relatively recently entered the HIC category. For this reason, we considered that they are not necessarily representative of other countries in HICs, and therefore an assumption used by Lau, et al.<sup>5</sup> of mid-0.005% (range 0.0045-0.0055) was adopted.

### S.8.2.2 Informal recycling sector productivity

Productivity data from 18 municipalities first reported by Lau, et al.<sup>5</sup> indicated a range of between 3.525-19.27 t·y<sup>-1</sup> of waste (all types of recyclate) collected for recycling by selective collectors (**Fig. S15A**). This productivity data was converted to a PDF by assuming a uniform distribution. Multiplication of estimated number of waste pickers in a municipality with the expected productivity of each waste picker and a working year of 235 days, enabled the mass collected by the informal recycling sector to be approximated. This was undertaken within the probabilistic MFA detailed in **Section S.9** to incorporate the uncertainty as represented by the above PDFs.

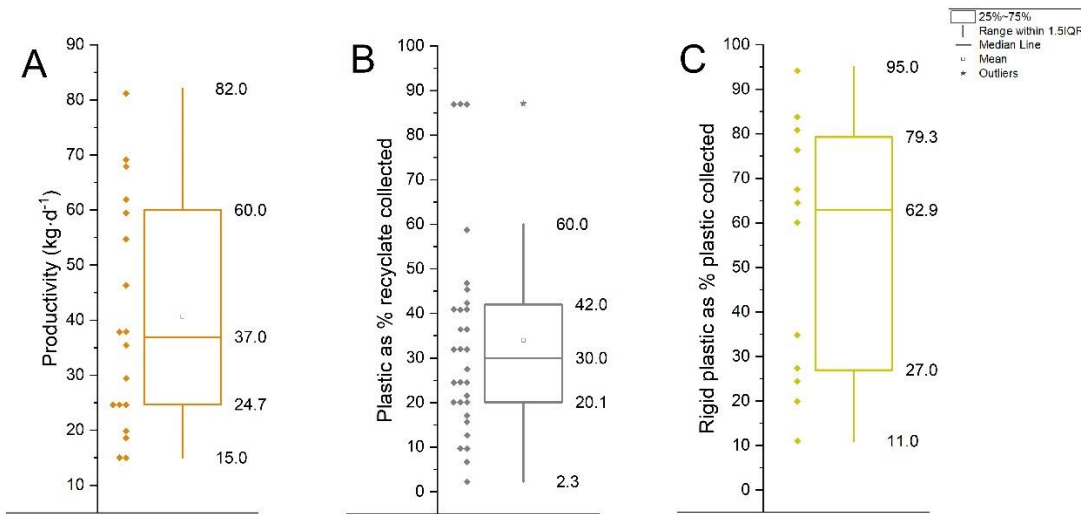

**Fig. S15.** Central tendency and spread of (A) daily productivity of informal recyclers in municipalities (n = 18); (B) proportion of waste collected by informal recyclers that is plastic (n = 29); and (C) proportion of plastic waste collected by informal recyclers that is rigid format.

### S.8.2.3 Proportion of plastic collected by informal recycling sector (C15)

The proportion of waste collected by informal recyclers that was plastic (C15) in UMCs, LMCs, and LICs was based on 30 sources of data collected in 30 municipalities (**Table S24**). A Beta-Pert distribution was assumed with central value of 30% and a range of 2.3-60% (**Fig. S15B**).

There is little data available on the proportion of plastic collected by informal recyclers in HICs where plastic recycling is driven by regulation and financial subsidies rather than unsupported market forces<sup>253</sup>. Financial incentives such as producer responsibility<sup>254</sup> are out of reach of informal recyclers and because they are light and have low value (by weight) relative to the cost of living, we assume they are barely targeted if at all on a weight basis. Using a Beta-Pert distribution as with the Global South Countries, we chose the lower end of the range 2.3% as our central value, multiplied by 2 for the upper and of the range (4.6%) and a zero for the lower end.

1421 **Table S24.** Plastic proportion of waste collected by informal recyclers.

| Country       | Municipality                     | Year data collected | Proportion waste collected by informal recyclers that is plastic (%) | Source |
|---------------|----------------------------------|---------------------|----------------------------------------------------------------------|--------|
| Brazil        | Esteio                           | 2017                | 20.76                                                                | 212    |
| Indonesia     | Bantar Gebang                    | 2014                | 87.00                                                                | 255    |
| India         | Tiruchirappalli                  | 2010                | 60.00                                                                | 216    |
| Brazil        | Santa Rita                       | 2012                | 32.80                                                                | 256    |
| India         | Dhanbad                          | 2018                | 43.00                                                                | 178    |
| South Africa  | Johannesburg                     | 2017                | 25.97                                                                | 257    |
| Egypt         | Cairo                            | 2016                | 13.00                                                                | 258    |
| Pakistan      | Halimar Town                     | 2015                | 32.00                                                                | 228    |
| India         | Kanpur                           | 2008                | 33.00                                                                | 238    |
| Cote d'Ivoire | Abdjan                           | 2016                | 47.00                                                                | 259    |
| Bangladesh    | Rajshahi City                    | 2012                | 2.25                                                                 | 246    |
| Brazil        | Campinas                         | 2013                | 24.80                                                                | 260    |
| China         | Beijing-Haidian District (North) | 2017                | 17.80                                                                | 247    |
| China         | Beijing-Haidian District (North) | 2017                | 6.80                                                                 |        |
| China         | Beijing (North)                  | 2010                | 10.50                                                                | 261    |
| Ecuador       | Cuenca                           | 2020                | 25.00                                                                | 262    |
| Ecuador       | Cuenca                           | 2019                | 22.10                                                                | 263    |
| Bolivia       | La Paz                           | 2020                | 20.70                                                                | 264    |
| Brazil        | Belo Horizonte                   | 2021                | 28.00                                                                | 69     |
| Brazil        | Londrina, Parana state           | 2020                | 20.07                                                                | 265    |
| Brazil        |                                  | 2020                | 11.00                                                                | 266    |
| Indonesia     | Bantar Gebang                    | 2020                | 87.21                                                                | 267    |
| Ghana         | Greater Accra Metropolitan Area  | 2023                | 87.12                                                                | 59     |
| Ecuador       | Quito                            | 2015                | 42.00                                                                | 268    |
| Ecuador       | Guayaquil                        | 2015                | 42.00                                                                |        |
| Ecuador       | Cuenca                           | 2015                | 37.00                                                                |        |
| Ecuador       | Manta                            | 2015                | 46.00                                                                |        |
| Ecuador       | Average of 4 cities              | 2015                | 42.00                                                                |        |
| Nigeria       | Abuja                            | 2021                | 36.47                                                                | 269    |
| Brazil        | Ribeirão Pires, São Paulo        | 2013                | 15.91                                                                | 243    |

1422

1423

#### S.8.2.4 Proportion of plastic collected by informal recycling sector that is rigid (C21a)

The proportion of plastic collected by informal recyclers that is rigid (C21a) was based on 10 sources that presented data on 11 municipalities (**Table S25**). Due to the paucity of data and large spread, we were not confident to assign a central value and therefore chose a uniform distribution between the range 11-95% (**Fig. S15C**) for all countries.

**Table S25.** Proportion plastic waste collected by informal recyclers that is rigid.

| Location of cohort (country) | Location of cohort (municipality) | Year of publication | Rigid (%) | Source |
|------------------------------|-----------------------------------|---------------------|-----------|--------|
| Indonesia                    | Bantar Gebang                     | 2019                | 20.0      | 270    |
| Indonesia                    | Jakarta                           | 2018                | 95.0      | 210    |
| Indonesia                    | Bantar Gebang                     | 2014                | 11.0      | 255    |
| India                        | Tiruchirappalli                   | 2010                | 77.0      | 216    |
| India                        | Dhanbad                           | 2018                | 81.5      | 178    |
| Pakistan                     | Halimar Town                      | 2015                | 84.0      | 228    |
|                              |                                   |                     | 60.6      |        |
| India                        | Kanpur                            | 2008                | 28.2      | 238    |
| Ecuador                      | Cuenca                            | 2020                | 35.1      | 262    |
| Ecuador                      | Cuenca                            | 2019                | 65.2      | 263    |
| Brazil                       | na                                | 2020                | 67.9      | 266    |
| Indonesia                    | Bantar Gebang                     | 2020                | 25.7      | 267    |

#### S.8.3 Rejects of rigid and flexible plastic from sorting and reprocessing by formal (C24aa C24ab) and informal (C23aa, C23ab) sectors

We estimated plastic mass rejects (sometimes referred to in the literature as ‘losses’) at the sorting and reprocessing steps by creating a sub-model which used a set of logical assumptions about the economic value and recyclability of different polymers and formats. We used these to assign the probability that different types of plastic waste would be selected for recycling rather than screened for recovery or disposal. As summarised in **Fig. S16**, we applied these reject rates to baseline data for the amount of plastic waste collected for recycling in the Global North and South.

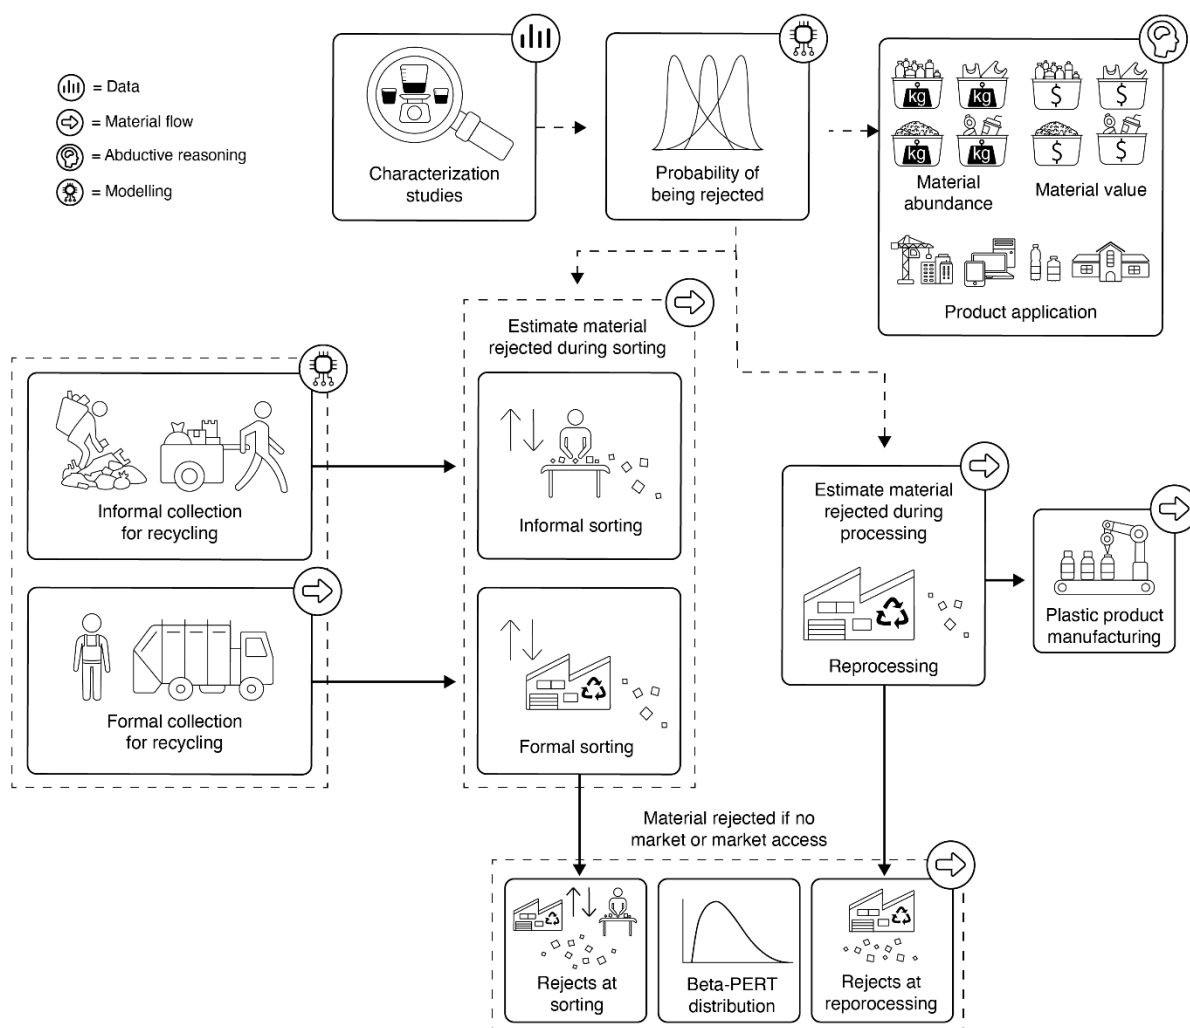

**Fig. S16.** Sub-model for estimating rejects (sometimes referred to in the literature as ‘losses’) (wt. as received (ar) reporting basis) from plastic waste that has been collected for recycling.

### S.8.3.1 Step 1: Establish baseline plastic waste collected for recycling

The OECD provided us with polymer specific data on the amount of MSW plastic waste collected for recycling from their ENV-Linkages model (‘Global Plastics Outlook’), which underlies a dataset that is published online in a summarised format<sup>271</sup>. Textiles were excluded for congruence with our model. We developed our assumptions according to three municipal categories: packaging; electrical and electronic; and consumer and institutional. Data for LDPE used in electrical and electronic equipment was excluded, because LDPE is rarely used in electrical and electronic equipment<sup>272,273</sup>. For simplification, we assumed that OECD members are HICs, which collect formally, and non-OECD countries are LMICs, which collect informally.

The ENV-Linkages model does not differentiate between flexible and rigid material collected for recycling. Therefore, we used European plastic packaging consumption data as a proxy, calculating the amount of flexible plastic consumed in each polymer category reported by Nonclercq<sup>274</sup> as a proportion of plastic consumption reported by Cimpan, et al.<sup>275</sup> (Table S26). Data to indicate the proportion of each polymer collected for recycling which is flexible were not

available for LMICs. Therefore, we calculated a ratio between the mean proportion of flexible packaging for Europe (**Table S26**) and the median proportion of flexible material reported by WaCT data points. We applied this ratio to each of the proportions calculated for Europe.

**Table S26.** Estimated flexible plastic packaging as a proportion of all plastic packaging.

| Polymer           | Total consumption<br>(Mt in 2014) <sup>275</sup> | Flexible consumption<br>(Mt in 2014) <sup>274</sup> | Proportion of total plastic<br>packaging that is flexible<br>in HICs (%) | Proportion of total plastic<br>packaging that is flexible<br>in LMICs (%) |
|-------------------|--------------------------------------------------|-----------------------------------------------------|--------------------------------------------------------------------------|---------------------------------------------------------------------------|
| HDPE              | 3.30                                             | 0.23                                                | 6.97                                                                     | 9.66                                                                      |
| LDPE <sup>a</sup> | 5.79                                             | 5.79                                                | 100.00                                                                   | 100.00                                                                    |
| OTHER             | 1.37                                             | 0.24                                                | 17.50                                                                    | 24.25                                                                     |
| PET               | 3.29                                             | 0.16                                                | 4.87                                                                     | 6.75                                                                      |
| PP                | 3.78                                             | 0.88                                                | 23.31                                                                    | 32.30                                                                     |
| PVC               | 0.38                                             | 0.08                                                | 20.79                                                                    | 28.82                                                                     |
| Total             | 17.91                                            | 6.42                                                | 35.86                                                                    | 57.14                                                                     |

<sup>a</sup>LDPE includes LLDEPE. All flexible consumption was reported by Nonclercq<sup>274</sup> except LDPE which was all assumed to be flexible. Abbreviations: Million tonnes (Mt); high density polyethylene (HDPE); low density polyethylene (LDPE); polyethylene terephthalate (PET); polyvinyl chloride (PCV); polypropylene (PP); high income counties (HIC); low- and middle-income countries (LMIC).

Polyurethane (PUR) collected for recycling is assumed to be used as bonding or coating and therefore rigid, except for in consumer and institutional category where it was assumed to be flexible and used as foam in mattresses and furniture<sup>276</sup>. We assumed that PVC collected under consumer and institutional was entirely rigid. We applied the proportions of flexible plastic packaging (**Table S26**) to the OECD polymer specific data for each category as shown in **Table S27**.



**Table S27.** Estimated mass of municipal solid waste plastic collected for recycling in high income countries and low-middle income countries based on MSW data underlying the ENV-Linkages model (‘Global Plastics Outlook’)<sup>271</sup>. Rigid and flexible plastics were estimated using European packaging data provided by Cimpan, et al.<sup>275</sup> and Nonclercq<sup>274</sup> as a proxy, as detailed in **Table S26**.

| Sector/<br>application                             | Plastic type by dominant<br>polymer | Rigid & flexible mixed as reported |              |              | Rigid    | Flexible | Rigid     | Flexible |
|----------------------------------------------------|-------------------------------------|------------------------------------|--------------|--------------|----------|----------|-----------|----------|
|                                                    |                                     | HIC (Mt)                           | LMIC (Mt)    | Total (Mt)   | HIC (Mt) |          | LMIC (Mt) |          |
| Consumer &<br>Institutional<br>Products            | HDPE                                | 0.86                               | 1.04         | 1.91         | 0.86     | 0.00     | 1.04      | 0.00     |
|                                                    | LDPE, LLDPE                         | 0.62                               | 0.75         | 1.38         | 0.00     | 0.62     | 0.00      | 0.75     |
|                                                    | Other                               | 0.01                               | 0.02         | 0.03         | 0.01     | 0.00     | 0.02      | 0.00     |
|                                                    | PET                                 | 0.00                               | 0.00         | 0.00         | 0.00     | 0.00     | 0.00      | 0.00     |
|                                                    | PP                                  | 1.27                               | 1.54         | 2.82         | 1.27     | 0.00     | 1.54      | 0.00     |
|                                                    | PS                                  | 0.16                               | 0.19         | 0.36         | 0.16     | 0.00     | 0.19      | 0.00     |
|                                                    | PUR                                 | 0.07                               | 0.08         | 0.15         | 0.00     | 0.07     | 0.00      | 0.08     |
|                                                    | PVC                                 | 0.08                               | 0.09         | 0.17         | 0.08     | 0.00     | 0.09      | 0.00     |
| <b>Consumer &amp; Institutional Products Total</b> |                                     | <b>3.08</b>                        | <b>3.72</b>  | <b>6.80</b>  | 2.39     | 0.69     | 2.89      | 0.84     |
| Electrical/<br>Electronic                          | HDPE                                | 0.08                               | 0.08         | 0.16         | 0.08     | 0.00     | 0.08      | 0.00     |
|                                                    | LDPE, LLDPE                         | 0.00                               | 0.00         | 0.00         | 0.00     | 0.00     | 0.00      | 0.00     |
|                                                    | Other                               | 0.02                               | 0.02         | 0.03         | 0.02     | 0.00     | 0.02      | 0.00     |
|                                                    | PET                                 | 0.00                               | 0.00         | 0.00         | 0.00     | 0.00     | 0.00      | 0.00     |
|                                                    | PP                                  | 0.28                               | 0.27         | 0.55         | 0.28     | 0.00     | 0.27      | 0.00     |
|                                                    | PS                                  | 0.05                               | 0.05         | 0.10         | 0.05     | 0.00     | 0.05      | 0.00     |
|                                                    | PUR                                 | 0.03                               | 0.03         | 0.05         | 0.03     | 0.00     | 0.03      | 0.00     |
|                                                    | PVC                                 | 0.04                               | 0.04         | 0.09         | 0.04     | 0.00     | 0.04      | 0.00     |
| <b>Electrical/Electronic Total</b>                 |                                     | <b>0.51</b>                        | <b>0.49</b>  | <b>1.00</b>  | 0.51     | 0.00     | 0.49      | 0.00     |
| Packaging                                          | HDPE                                | 5.20                               | 6.59         | 11.79        | 4.84     | 0.36     | 5.96      | 0.64     |
|                                                    | LDPE, LLDPE                         | 3.00                               | 3.90         | 6.90         | 0.00     | 3.00     | 0.00      | 3.90     |
|                                                    | Other                               | 0.01                               | 0.01         | 0.01         | 0.00     | 0.00     | 0.01      | 0.00     |
|                                                    | PET                                 | 4.24                               | 5.39         | 9.63         | 4.04     | 0.21     | 5.02      | 0.36     |
|                                                    | PP                                  | 3.00                               | 3.80         | 6.80         | 2.30     | 0.70     | 2.57      | 1.23     |
|                                                    | PS                                  | 0.21                               | 0.27         | 0.48         | 0.21     | 0.00     | 0.27      | 0.00     |
|                                                    | PUR                                 | 0.01                               | 0.02         | 0.03         | 0.01     | 0.00     | 0.02      | 0.00     |
|                                                    | PVC                                 | 0.13                               | 0.16         | 0.29         | 0.10     | 0.03     | 0.12      | 0.05     |
| <b>Packaging Total</b>                             |                                     | <b>15.81</b>                       | <b>20.14</b> | <b>35.95</b> | 11.51    | 4.30     | 13.96     | 6.18     |
| <b>Grand total</b>                                 |                                     | <b>19.40</b>                       | <b>24.35</b> | <b>43.75</b> | 14.40    | 4.99     | 17.34     | 7.01     |

Abbreviations: Million tonnes (Mt); high density polyethylene (HDPE); low density polyethylene (LDPE); polyethylene terephthalate (PET); polyvinyl chloride (PCV); polypropylene (PP); high income counties (HIC); low- and middle-income countries (LMIC).

### S.8.3.2 Step 2 and 3: Identify empirical or assumptive data on rejects or use abductive reasoning to estimate

#### S.8.3.2.1 General assumptions, data, and abductive reasoning

We used a combination of empirical data, reported assumptions and abductive reasoning to estimate rejects at the sorting and reprocessing stages. For simplification of this step, plastic waste collected for recycling in LMICs was assumed to be collected exclusively by the informal sector, despite a few examples identified and discussed in **Section S.6.4.3.5** and **Section S.6.4.4.3**. We also simplify what is a complex continuum of processes into two basic stages of: 1) Sorting; and 2) Reprocessing, which would otherwise be overly challenging to model at global scale.

1491 **Table S28.** Empirical data, assumptions and abductive reasoning underlying decisions made on  
1492 the mass of rejects for material collected for recycling through formal and informal systems.

| Sector / application    | Formal collection, sorting                                                                                                                                                                                                                                                                                                                                                                                                                                                                                                                                                                                                                                                                                                                                                                                                                                                                                                                                                                                                                                                                                                                                                                                                                                                                                                                                                                                                                                                                                                                                                   | Informal collection and sorting                                                                                                                                                                                                                                                                                                                                                                                                                                                                                                                                                                                                                                                                                                                                                                                                                                                                                                                                                                                                                                                                                                                                                                                                                                                                                                                                                                                                                                                                             |
|-------------------------|------------------------------------------------------------------------------------------------------------------------------------------------------------------------------------------------------------------------------------------------------------------------------------------------------------------------------------------------------------------------------------------------------------------------------------------------------------------------------------------------------------------------------------------------------------------------------------------------------------------------------------------------------------------------------------------------------------------------------------------------------------------------------------------------------------------------------------------------------------------------------------------------------------------------------------------------------------------------------------------------------------------------------------------------------------------------------------------------------------------------------------------------------------------------------------------------------------------------------------------------------------------------------------------------------------------------------------------------------------------------------------------------------------------------------------------------------------------------------------------------------------------------------------------------------------------------------|-------------------------------------------------------------------------------------------------------------------------------------------------------------------------------------------------------------------------------------------------------------------------------------------------------------------------------------------------------------------------------------------------------------------------------------------------------------------------------------------------------------------------------------------------------------------------------------------------------------------------------------------------------------------------------------------------------------------------------------------------------------------------------------------------------------------------------------------------------------------------------------------------------------------------------------------------------------------------------------------------------------------------------------------------------------------------------------------------------------------------------------------------------------------------------------------------------------------------------------------------------------------------------------------------------------------------------------------------------------------------------------------------------------------------------------------------------------------------------------------------------------|
| Packaging               | <p><b>Assumptions</b></p> <ul style="list-style-type: none"> <li>• Predominantly collected alongside a mixture of non-plastics or, where collected separately, as a mixture of plastics.</li> <li>• Almost never collected as separate stream except for LDPE wrap from commercial sources which is generally collected separately when collected for recycling.</li> </ul> <p><b>Reject rates applied</b></p> <ul style="list-style-type: none"> <li>• PS, PVC, PUR and ‘other’ plastics not separated for recycling therefore 100% rejects across sorting and reprocessing stages.</li> <li>• Non-LDPE films not separated for recycling therefore 100% rejects across sorting and reprocessing stages.</li> <li>• Reject rates at sorting stage for other plastics are mean reported by Antonopoulos, et al.<sup>277</sup> for European and UK materials recovery facilities: <ul style="list-style-type: none"> <li>○ PET 19%</li> <li>○ PP 43%</li> <li>○ LDPE 42%</li> <li>○ HDPE 24%</li> </ul> </li> </ul> <p>Rejects at the reprocessing stage are based on analysis of data reported by Roosen, et al.<sup>278</sup>, presented in <b>Section S.8.3.2.2.</b></p>                                                                                                                                                                                                                                                                                                                                                                                                   | <p><b>Assumptions</b></p> <ul style="list-style-type: none"> <li>• Material is manually selected at the point of collection meaning that subsequent rejects are likely to be very small – waste pickers are unlikely to expend effort selecting and carrying substantial amounts of material that is not likely to return value.</li> <li>• Therefore, rejects consist mainly of closures, plastic labels and some soiled material rejected by junkshops.</li> </ul> <p><b>Reject rates applied</b></p> <ul style="list-style-type: none"> <li>• As there are no published studies on this aspect of the informal sector, we assume informal sector rejects as twofold: <ol style="list-style-type: none"> <li>1) We used an assumption from Lau, et al.<sup>5</sup> that 5% of material collected for recycling by the informal sector is rejected during sorting; and</li> <li>2) That rejects at the reprocessing stages are commensurate with analysis of data reported by Roosen, et al.<sup>278</sup> and Antonopoulos, et al.<sup>277</sup> presented in <b>Section S.8.3.2.2.</b></li> </ol> </li> </ul>                                                                                                                                                                                                                                                                                                                                                                                            |
| Electrical & electronic | <p><b>Assumptions</b></p> <ul style="list-style-type: none"> <li>• The mass of plastic collected for recycling is part of the complex assemblies of items that constitute electrical and electronic equipment and cabling.</li> <li>• Several sorting businesses now exist in Europe<sup>279-282</sup>, and presumably elsewhere across HICs, but separation of plastics in these plants is commercially nascent.</li> <li>• Sorting is predominantly by comminution and optical or electrostatic separation<sup>283</sup>.</li> <li>• Of the mass collected for recycling, only a very small proportion is likely to be recoverable for reprocessing due to its potentially hazardous characteristics, and the co-processing conditions which hinder purity<sup>284,285</sup>.</li> </ul> <p><b>Reject rates applied</b></p> <ul style="list-style-type: none"> <li>• On the basis of evidence that markets for secondary post-consumer PU and PS packaging are weak and that recovery rates are low when processed<sup>277</sup>, we assume that recovery of PU and PS from WEEE are likely to be low or non-existent given that recovery from WEEE sources is more technically challenging. Therefore, we assume 100% reject rate at the sorting stage.</li> <li>• In the absence of strong data, assuming that formal WEEE reclaimers have advanced conservatively in the previous decade, and that the majority of material is too contaminated to be recycled, we apply a 90% reject rate for sorting and reprocessing to all non-PUR and PS WEEE plastics.</li> </ul> | <p><b>Assumptions</b></p> <ul style="list-style-type: none"> <li>• As with formal system, informal reclaimers are focused on the most valuable constituents of WEEE, the metals.</li> <li>• There is some evidence that they recycle plastics in some locations<sup>286</sup>, but in others they are simply burned due to lack of market access<sup>287</sup>.</li> <li>• Informal recyclers work harder to reclaim more material if it is technically possible. They are also likely to have less awareness of the hazardous nature of some WEEE plastics and therefore are less selective about which plastics to reclaim.</li> </ul> <p><b>Reject rates applied</b></p> <ul style="list-style-type: none"> <li>• PVC is mainly used in cabling in WEEE, and the informal sector is unlikely to strip and recover it due to the extensive time taken. Evidence suggests it is almost always burned in open uncontrolled fires<sup>288</sup>. Therefore, we attribute a 100% reject rate for PVC at the sorting stage.</li> <li>• On the basis that informal sector workers make more effort to recover less concentrated materials but that they have less technical capability to do so, we assume the following: <ul style="list-style-type: none"> <li>○ For PS and PU, 100% rejects at the sorting stage for the same reason as HICs.</li> <li>○ For HDPE, PP and other plastics, recovery rates slightly higher than HICs of 85% across the sorting and reprocessing stages.</li> </ul> </li> </ul> |

| Sector / application     | Formal collection, sorting                                                                                                                                                                                                                                                                                                                                                                                                                                                                                                                                                                                                                                                                                                                                                                                                                                                                                                                                                                                                                                                                                                                                                                                                                                                                                                                                                                                                                                                                                            | Informal collection and sorting                                                                                                                                                                                                                                                                                                                                                                                                                                                                                                                                                                                                                                                                                                                               |
|--------------------------|-----------------------------------------------------------------------------------------------------------------------------------------------------------------------------------------------------------------------------------------------------------------------------------------------------------------------------------------------------------------------------------------------------------------------------------------------------------------------------------------------------------------------------------------------------------------------------------------------------------------------------------------------------------------------------------------------------------------------------------------------------------------------------------------------------------------------------------------------------------------------------------------------------------------------------------------------------------------------------------------------------------------------------------------------------------------------------------------------------------------------------------------------------------------------------------------------------------------------------------------------------------------------------------------------------------------------------------------------------------------------------------------------------------------------------------------------------------------------------------------------------------------------|---------------------------------------------------------------------------------------------------------------------------------------------------------------------------------------------------------------------------------------------------------------------------------------------------------------------------------------------------------------------------------------------------------------------------------------------------------------------------------------------------------------------------------------------------------------------------------------------------------------------------------------------------------------------------------------------------------------------------------------------------------------|
| Consumer & institutional | <p><b>Assumptions</b></p> <ul style="list-style-type: none"> <li>• Items include all non-packaging plastics consumed domestically, commercially, and institutionally. Examples include toys, garden furniture, household and commercial furniture (i.e., all plastic items that are not electrical and electronic, part of a vehicle, packaging, used in agriculture, or part of a building construction).</li> <li>• If recovered for recycling, these items are likely to exist in a format that is much larger than most packaging items.</li> <li>• All material collected for recycling will be rigid format and many items and objects will be assemblies of items and materials.</li> </ul> <p><b>Reject rates applied</b></p> <ul style="list-style-type: none"> <li>• In the absence of any empirical data, we assumed the same reject rates as plastic packaging across the sorting and reprocessing stages for all materials except the following: <ul style="list-style-type: none"> <li>○ PUR is mostly collected in foam format as part of mattress collections. In many cases it is likely to be incinerated or landfilled, but there is strong evidence of recycling too, therefore we assign an assumption of 80% reject rate at the sorting stage.</li> <li>○ PVC occurs in this category as furniture, often as a single, un-bonded or assembled material. Therefore, we suggest that the reject rates are relatively low and apply a 50% reject rate at the sorting stage.</li> </ul> </li> </ul> | <p><b>Assumptions</b></p> <ul style="list-style-type: none"> <li>• Unlike electrical and electronic waste, items in this category are unlikely to be collected for recycling unless the collector intends to recycle them. This is because they do not generally occur as bonded assemblies with other more valuable materials such as metals.</li> </ul> <p><b>Reject rates applied</b></p> <ul style="list-style-type: none"> <li>• For this category we apply the same rate of 5% at the sorting stage as for packaging.</li> <li>• We applied rejects at the reprocessing stage using analysis of data reported by Roosen, et al.<sup>278</sup> and Antonopoulos, et al.<sup>277</sup> (for PVC and PS) presented in <b>Section S.8.3.2.2</b>.</li> </ul> |

Abbreviations: Million tonnes (Mt); high density polyethylene (HDPE); low density polyethylene (LDPE); polyethylene terephthalate (PET); polystyrene (PS); polyvinyl chloride (PCV); polypropylene (PP); polyurethane (PUR); waste electrical and electronic equipment (WEEE); high income countries (HIC); low- and middle-income countries (LMIC).

### **S.8.3.2.2 Material rejects at reprocessors**

Chemical and physical characterisation of plastic packaging item data reported by Roosen, et al.<sup>278</sup> was used to estimate potential rejects at reprocessors for rigid HDPE, PET and PP using a three step process: (1) We calculated the content of the target plastic component, meaning material targeted for recycling, as a proportion of total plastic (**Table S29**); (2) We deducted an assumed 1% process reject rate, to account for spillages and extrusion rejects (wastage); (3) We used the ratio of bottles to pots tubs and trays (excluding black plastics) reported in a weighted compositional analysis of plastic packaging collected for recycling in the UK<sup>289</sup> to approximate the proportion of each, and hence weight the anticipated rejects during reprocessing (**Table S30**).

**Table S29.** Non-target (not targeted for recycling) plastics sampled at plastics reprocessors as a proportion of total plastics processed based on item characterisation reported by Roosen, et al.<sup>278</sup>.

| Item type  | Target | Plastic residues | Non-plastic residues | As proportion of plastic excluding non-plastic residues |                       | Reject rates adjusted for 1% wastage |                       |
|------------|--------|------------------|----------------------|---------------------------------------------------------|-----------------------|--------------------------------------|-----------------------|
|            | Mean   | Mean             | Mean                 | Target (%)                                              | Residue (rejects) (%) | Target (%)                           | Residue (rejects) (%) |
| PET bottle | 81.60  | 11.60            | 6.80                 | 87.55                                                   | 12.45                 | 86.55                                | 13.45                 |
| PET tray   | 79.20  | 12.50            | 8.30                 | 86.37                                                   | 13.63                 | 85.37                                | 14.63                 |
| PE Bottle  | 77.50  | 13.60            | 8.90                 | 85.07                                                   | 14.93                 | 84.07                                | 15.93                 |
| PP Bottle  | 76.90  | 19.60            | 3.50                 | 79.69                                                   | 20.31                 | 78.69                                | 21.31                 |
| PP tray    | 91.30  | 1.00             | 7.70                 | 98.92                                                   | 1.08                  | 97.92                                | 2.08                  |
| Film       | 90.8   |                  | 9.2                  | 100.00                                                  | 0.00                  | 99.00                                | 1.00                  |

Abbreviations: polyethylene terephthalate (PET); polypropylene (PP); polyethylene (PE).

**Table S30.** Process of estimating the amount of material which is rejected for each item type listed in **Table S29** at the sorting and reprocessing stages according to typical ratio of bottles to pots, tubs and trays after Chruszcz and Reeve<sup>289</sup>.

| Dominant polymer        | Item type          | Colour  | Composition reported by Chruszcz and Reeve <sup>289</sup> (%) | Normalised composition (%) | Assigned target rate (%)                  | Item descriptor from Roosen, et al. <sup>278</sup> | Reject rate per item type (%) |
|-------------------------|--------------------|---------|---------------------------------------------------------------|----------------------------|-------------------------------------------|----------------------------------------------------|-------------------------------|
| HDPE                    | Milk bottle        | Natural | 13.20                                                         | 61.1                       | 84.07                                     | PE Bottle                                          | 9.734                         |
| HDPE                    | Non-milk bottles   | Jazz    | 7.70                                                          | 35.6                       | 84.07                                     | PE Bottle                                          | 5.678                         |
| HDPE                    | Pots, tubs & trays | Natural | 0.10                                                          | 0.5                        | 97.92                                     | PP tray                                            | 0.010                         |
| HDPE                    | Pots, tubs & trays | Jazz    | 0.60                                                          | 2.8                        | 97.92                                     | PP tray                                            | 0.058                         |
| <b>Total HDPE 21.60</b> |                    |         |                                                               | <b>100.0</b>               | <b>Weighted average rejects HDPE 15.5</b> |                                                    |                               |
| PP                      | Bottles            | Jazz    | 0.4                                                           | 4.0                        | 78.69                                     | PP Bottle                                          | 0.844                         |
| PP                      | Pots, tubs & trays | Natural | 4.4                                                           | 43.6                       | 97.92                                     | PP tray                                            | 0.908                         |
| PP                      | Pots, tubs & trays | Jazz    | 5.3                                                           | 52.5                       | 97.92                                     | PP tray                                            | 1.093                         |
| <b>Total PP 10.1</b>    |                    |         |                                                               | <b>100.0</b>               | <b>Weighted average rejects PP 2.8</b>    |                                                    |                               |
| PET                     | Bottles            | Natural | 26.4                                                          | 65.5                       | 86.55                                     | PET bottle                                         | 8.809                         |
| PET                     | Bottles            | Jazz    | 3.1                                                           | 7.7                        | 86.55                                     | PET bottle                                         | 1.034                         |
| PET                     | Pots, tubs & trays | Natural | 10.3                                                          | 25.6                       | 85.37                                     | PET tray                                           | 3.740                         |
| PET                     | Pots, tubs & trays | Jazz    | 0.5                                                           | 1.2                        | 85.37                                     | PET tray                                           | 0.182                         |
| <b>Total PET 40.3</b>   |                    |         |                                                               | <b>100.0</b>               | <b>Weighted average rejects PET 13.8</b>  |                                                    |                               |

Abbreviations: High density polyethylene (HDPE); polyethylene terephthalate (PET); polypropylene (PP).

For PET film, HDPE film, PP film, rigid PS and rigid PVC, we used arithmetic mean reject rates reported by Antonopoulos, et al.<sup>277</sup> (**Table S35**). In the absence of better data, the reject rate for PUR and Other was assumed the same as PVC. We assumed the same reject rates at the reprocessing stage for materials collected for recycling by the formal and informal sectors.

**Table S31.** Summary of plastic packaging reject rates at the reprocessing stage.

| Plastic type by dominant polymer | Rigid           |                | Flexible        |                |
|----------------------------------|-----------------|----------------|-----------------|----------------|
|                                  | Reject rate (%) | Data source    | Reject rate (%) | Data source    |
| HDPE                             | 15.48           | (Table S30)    | 29.00           | <sup>277</sup> |
| LDPE, LLDPE                      |                 |                | 1.00            | (Table S29)    |
| Other                            | 20.00           | <sup>277</sup> | 29.00           | <sup>277</sup> |
| PET                              | 13.76           | (Table S30)    | 29.00           | <sup>277</sup> |
| PP                               | 2.84            | (Table S30)    | 29.00           | <sup>277</sup> |
| PS                               | 34.00           | <sup>277</sup> |                 |                |
| PUR                              | 20.00           | <sup>277</sup> |                 |                |
| PVC                              | 20.00           | <sup>277</sup> | 29.00           | <sup>277</sup> |

Abbreviations: High density polyethylene (HDPE); low density polyethylene (LDPE); linear low-density polyethylene (LLDPE); polyethylene terephthalate (PET); polystyrene (PS); polyvinyl chloride (PCV); polypropylene (PP); polyurethane (PUR).

**S.8.3.3 Step 3: Apply evidenced or assumed reject rates to the mass of plastic collected for recycling**

Reject rates at the sorting and reprocessing stages were applied to the mass of plastic under each industrial sector / application and plastic type as shown in **Table S33**. The mass of each category was then summed for rigid and flexible material for the formal and informal sectors to provide weighted average reject rates for each category. The reject rates for each process flow are summarised in **Table S32**.

**Table S32.** Summary of rejects calculated for each process.

| Formality | Format   | System component | Proportion of collected for recycling that is rejected (lost) before conversion |
|-----------|----------|------------------|---------------------------------------------------------------------------------|
| Formal    | Rigid    | C24aa            | 40.74                                                                           |
|           | Flexible | C24ab            | 58.08                                                                           |
| Informal  | Rigid    | C23aa            | 18.84                                                                           |
|           | Flexible | C23ab            | 14.90                                                                           |

Beta-PERT distributions were assigned for rejects taking the value reported in **Table S32** as the most likely value, and assigning a  $\pm 20\%$  uncertainty to each for the upper and lower plausible bounds, and assuming a shape factor of four.

536 **Table S33.** Reject rates applied to main plastic types for three municipal solid waste industrial sectors / applications.

| Industrial sector / by application | Plastic type by dominant polymer | Collected for recycling mass (Mt) |       |               |       |       |       |      |     |       |     |      |      |       |       | Sorting reject rates (%) |       |              |      | Post sorting mass (Mt) |       |       |        | Reprocessing reject rates (%) |        |       |  | Post reprocessing mass (Mt) |  |       |  | Post reprocessing rejects as proportion of collected for recycling (%) |  |  |  |
|------------------------------------|----------------------------------|-----------------------------------|-------|---------------|-------|-------|-------|------|-----|-------|-----|------|------|-------|-------|--------------------------|-------|--------------|------|------------------------|-------|-------|--------|-------------------------------|--------|-------|--|-----------------------------|--|-------|--|------------------------------------------------------------------------|--|--|--|
|                                    |                                  | Form .                            |       | Form . + Inf. |       | Form. |       | Inf. |     | Form. |     | Inf. |      | Form. |       | Inf.                     |       | Form. + Inf. |      | Form.                  |       | Inf.  |        | Form.                         |        | Inf.  |  | Form.                       |  | Inf.  |  |                                                                        |  |  |  |
|                                    |                                  | Rig. & flex.                      |       | Rig.          |       | Flex. |       | Rig. |     | Flex. |     | Rig. |      | Flex. |       | Rig.                     |       | Flex.        |      | Rig.                   |       | Flex. |        | Rig.                          |        | Flex. |  | Rig.                        |  | Flex. |  |                                                                        |  |  |  |
|                                    |                                  |                                   |       |               |       |       |       |      |     |       |     |      |      |       |       |                          |       |              |      |                        |       |       |        |                               |        |       |  |                             |  |       |  |                                                                        |  |  |  |
| Consumer & institutional           | HDPE                             | 0.86                              | 1.04  | 1.91          | 0.86  | 0.00  | 1.04  | 0.00 | 24  | 100   | 5   | 5    | 0.66 | 0.00  | 0.99  | 0.00                     | 15.48 | 29.00        | 0.55 | 0.00                   | 0.84  | 0.00  | 35.76  | na                            | 19.71  | na    |  |                             |  |       |  |                                                                        |  |  |  |
|                                    | LDPE*                            | 0.62                              | 0.75  | 1.38          | 0.00  | 0.62  | 0.00  | 0.75 | v   | 42    | na  | 5    | 0.00 | 0.36  | 0.00  | 0.72                     | na    | 1.00         | 0.00 | 0.36                   | 0.00  | 0.71  | na     | 42.58                         | na     | 5.95  |  |                             |  |       |  |                                                                        |  |  |  |
|                                    | Other                            | 0.01                              | 0.02  | 0.03          | 0.01  | 0.00  | 0.02  | 0.00 | 100 | na    | 5   | na   | 0.00 | 0.00  | 0.01  | 0.00                     | na    | na           | 0.00 | 0.00                   | 0.01  | 0.00  | 100.00 | na                            | 5.00   | na    |  |                             |  |       |  |                                                                        |  |  |  |
|                                    | PET                              | 0.00                              | 0.00  | 0.00          | 0.00  | 0.00  | 0.00  | 0.00 | na  | na    | na  | na   | 0.00 | 0.00  | 0.00  | 0.00                     | 13.76 | 29.00        | 0.00 | 0.00                   | 0.00  | 0.00  | na     | na                            | na     | na    |  |                             |  |       |  |                                                                        |  |  |  |
|                                    | PP                               | 1.27                              | 1.54  | 2.82          | 1.27  | 0.00  | 1.54  | 0.00 | 43  | na    | 5   | na   | 0.73 | 0.00  | 1.46  | 0.00                     | 2.84  | 29.00        | 0.71 | 0.00                   | 1.42  | 0.00  | 44.62  | na                            | 7.70   | na    |  |                             |  |       |  |                                                                        |  |  |  |
|                                    | PS                               | 0.16                              | 0.19  | 0.36          | 0.16  | 0.00  | 0.19  | 0.00 | 100 | na    | 5   | na   | 0.00 | 0.00  | 0.18  | 0.00                     | 34.00 | 29.00        | 0.00 | 0.00                   | 0.12  | 0.00  | 100.00 | na                            | 37.30  | na    |  |                             |  |       |  |                                                                        |  |  |  |
|                                    | PUR                              | 0.07                              | 0.08  | 0.15          | 0.00  | 0.07  | 0.00  | 0.08 | na  | 80    | na  | 5    | 0.00 | 0.01  | 0.00  | 0.08                     | na    | 29.00        | 0.00 | 0.01                   | 0.00  | 0.06  | na     | 85.80                         | na     | 32.55 |  |                             |  |       |  |                                                                        |  |  |  |
|                                    | PVC                              | 0.08                              | 0.09  | 0.17          | 0.08  | 0.00  | 0.09  | 0.00 | 50  | na    | 5   | 5    | 0.04 | 0.00  | 0.09  | 0.00                     | 20.00 | 29.00        | 0.03 | 0.00                   | 0.07  | 0.00  | 60.00  | na                            | 24.00  | na    |  |                             |  |       |  |                                                                        |  |  |  |
| Consumer & institutional total     |                                  | 3.08                              | 3.72  | 6.80          | 2.39  | 0.69  | 2.89  | 0.84 | na  | na    | na  | na   | 1.42 | 0.37  | 2.74  | 0.79                     | na    | na           | 1.29 | 0.37                   | 2.47  | 0.76  | 45.94  | 46.84                         | 14.54  | 8.57  |  |                             |  |       |  |                                                                        |  |  |  |
| Electrical/ electronic             | HDPE                             | 0.08                              | 0.08  | 0.16          | 0.08  | 0.00  | 0.08  | 0.00 | 90  | na    | 85  | na   | 0.01 | 0.00  | 0.01  | 0.00                     | na    | na           | 0.01 | 0.00                   | 0.01  | 0.00  | 90.00  | na                            | 85.00  | na    |  |                             |  |       |  |                                                                        |  |  |  |
|                                    | LDPE*                            | 0.00                              | 0.00  | 0.00          | 0.00  | 0.00  | 0.00  | 0.00 | na  | na    | na  | na   | 0.00 | 0.00  | 0.00  | 0.00                     | na    | na           | 0.00 | 0.00                   | 0.00  | 0.00  | na     | na                            | na     | na    |  |                             |  |       |  |                                                                        |  |  |  |
|                                    | Other                            | 0.02                              | 0.02  | 0.03          | 0.02  | 0.00  | 0.02  | 0.00 | 90  | na    | 85  | na   | 0.00 | 0.00  | 0.00  | 0.00                     | na    | na           | 0.00 | 0.00                   | 0.00  | 0.00  | 90.00  | na                            | 85.00  | na    |  |                             |  |       |  |                                                                        |  |  |  |
|                                    | PET                              | 0.00                              | 0.00  | 0.00          | 0.00  | 0.00  | 0.00  | 0.00 | na  | na    | na  | na   | 0.00 | 0.00  | 0.00  | 0.00                     | na    | na           | 0.00 | 0.00                   | 0.00  | 0.00  | na     | na                            | na     | na    |  |                             |  |       |  |                                                                        |  |  |  |
|                                    | PP                               | 0.28                              | 0.27  | 0.55          | 0.28  | 0.00  | 0.27  | 0.00 | 90  | na    | 85  | na   | 0.03 | 0.00  | 0.04  | 0.00                     | na    | na           | 0.03 | 0.00                   | 0.04  | 0.00  | 90.00  | na                            | 85.00  | na    |  |                             |  |       |  |                                                                        |  |  |  |
|                                    | PS                               | 0.05                              | 0.05  | 0.10          | 0.05  | 0.00  | 0.05  | 0.00 | 100 | na    | 100 | na   | 0.00 | 0.00  | 0.00  | 0.00                     | na    | na           | 0.00 | 0.00                   | 0.00  | 0.00  | 100.00 | na                            | 100.00 | na    |  |                             |  |       |  |                                                                        |  |  |  |
|                                    | PUR                              | 0.03                              | 0.03  | 0.05          | 0.03  | 0.00  | 0.03  | 0.00 | 100 | na    | 100 | na   | 0.00 | 0.00  | 0.00  | 0.00                     | na    | na           | 0.00 | 0.00                   | 0.00  | 0.00  | 100.00 | na                            | 100.00 | na    |  |                             |  |       |  |                                                                        |  |  |  |
|                                    | PVC                              | 0.04                              | 0.04  | 0.09          | 0.04  | 0.00  | 0.04  | 0.00 | 90  | na    | 100 | na   | 0.00 | 0.00  | 0.00  | 0.00                     | na    | na           | 0.00 | 0.00                   | 0.00  | 0.00  | 90.00  | na                            | 100.00 | na    |  |                             |  |       |  |                                                                        |  |  |  |
| Electrical/ electronic total       |                                  | 0.51                              | 0.49  | 1.00          | 0.51  | 0.00  | 0.49  | 0.00 | na  | na    | na  | na   | 0.04 | 0.00  | 0.06  | 0.00                     | na    | na           | 0.04 | 0.00                   | 0.06  | 0.00  | 91.57  | na                            | 88.68  | na    |  |                             |  |       |  |                                                                        |  |  |  |
| Packaging                          | HDPE                             | 5.20                              | 6.59  | 11.79         | 4.84  | 0.36  | 5.96  | 0.64 | 24  | 100   | 5   | 5    | 3.68 | 0.00  | 5.66  | 0.61                     | 15.48 | 29.00        | 3.11 | 0.00                   | 4.78  | 0.43  | 35.76  | 100.00                        | 19.71  | 32.55 |  |                             |  |       |  |                                                                        |  |  |  |
|                                    | LDPE*                            | 3.00                              | 3.90  | 6.90          | 0.00  | 3.00  | 0.00  | 3.90 | na  | 42    | na  | 5    | 0.00 | 1.74  | 0.00  | 3.71                     | na    | 1.00         | 0.00 | 1.73                   | 0.00  | 3.67  | na     | 42.58                         | na     | 5.95  |  |                             |  |       |  |                                                                        |  |  |  |
|                                    | Other                            | 0.01                              | 0.01  | 0.01          | 0.00  | 0.00  | 0.01  | 0.00 | 100 | 100   | 5   | 5    | 0.00 | 0.00  | 0.01  | 0.00                     | 20.00 | 29.00        | 0.00 | 0.00                   | 0.00  | 0.00  | 100.00 | 100.00                        | 24.00  | 32.55 |  |                             |  |       |  |                                                                        |  |  |  |
|                                    | PET                              | 4.24                              | 5.39  | 9.63          | 4.04  | 0.21  | 5.02  | 0.36 | 19  | 100   | 5   | 5    | 3.27 | 0.00  | 4.77  | 0.35                     | 13.76 | 29.00        | 2.82 | 0.00                   | 4.12  | 0.25  | 30.15  | 100.00                        | 18.08  | 32.55 |  |                             |  |       |  |                                                                        |  |  |  |
|                                    | PP                               | 3.00                              | 3.80  | 6.80          | 2.30  | 0.70  | 2.57  | 1.23 | 43  | 100   | 5   | 5    | 1.31 | 0.00  | 2.45  | 1.17                     | 2.84  | 29.00        | 1.27 | 0.00                   | 2.38  | 0.83  | 44.62  | 100.00                        | 7.70   | 32.55 |  |                             |  |       |  |                                                                        |  |  |  |
|                                    | PS                               | 0.21                              | 0.27  | 0.48          | 0.21  | 0.00  | 0.27  | 0.00 | 100 | 100   | 5   | na   | 0.00 | 0.00  | 0.26  | 0.00                     | 34.00 | na           | 0.00 | 0.00                   | 0.17  | 0.00  | 100.00 | na                            | 37.30  | na    |  |                             |  |       |  |                                                                        |  |  |  |
|                                    | PUR                              | 0.01                              | 0.02  | 0.03          | 0.01  | 0.00  | 0.02  | 0.00 | 100 | 100   | 5   | na   | 0.00 | 0.00  | 0.01  | 0.00                     | 20.00 | na           | 0.00 | 0.00                   | 0.01  | 0.00  | 100.00 | na                            | 24.00  | na    |  |                             |  |       |  |                                                                        |  |  |  |
|                                    | PVC                              | 0.13                              | 0.16  | 0.29          | 0.10  | 0.03  | 0.12  | 0.05 | 100 | 100   | 5   | 5    | 0.00 | 0.00  | 0.11  | 0.04                     | 20.00 | 29.00        | 0.00 | 0.00                   | 0.09  | 0.03  | 100.00 | 100.00                        | 24.00  | 32.55 |  |                             |  |       |  |                                                                        |  |  |  |
| Packaging total                    |                                  | 15.81                             | 20.14 | 35.95         | 11.51 | 4.30  | 13.96 | 6.18 | na  | na    | na  | na   | 8.26 | 1.74  | 13.26 | 5.87                     | na    | na           | 7.20 | 1.73                   | 11.55 | 5.21  | 37.41  | 59.88                         | 17.29  | 15.76 |  |                             |  |       |  |                                                                        |  |  |  |
| Grand total                        |                                  | 19.40                             | 24.35 | 43.75         | 14.40 | 4.99  | 17.34 | 7.01 | na  | na    | na  | na   | 9.72 | 2.12  | 16.06 | 6.66                     | na    | na           | 8.54 | 2.09                   | 14.07 | 5.97  | 40.74  | 58.08                         | 18.84  | 14.90 |  |                             |  |       |  |                                                                        |  |  |  |

537 High income countries are assumed to be formal and non-high-income countries are assumed informal. \*LDPE includes LLDPE. Abbreviations: Formal (Form.), informal (Inf.); rigid (rig.); flexible (flex.); million tonnes (Mt); high density polyethylene (HDPE); low density polyethylene (LDPE); linear low-density polyethylene (LLDPE); polyethylene terephthalate (PET); polystyrene (PS);  
538 polyvinyl chloride (PCV); polypropylene (PP); polyurethane (PUR).  
539

#### S.8.3.4 Mismanagement of rejects from sorting and reprocessing (C25aa, C25ab, C26aa, C26ab)

To understand the proportion of rejects which are mismanaged, we created a further sub-model which used collection coverage and street sweeping efficiency to approximate mismanagement activity data (**Fig. S17**).

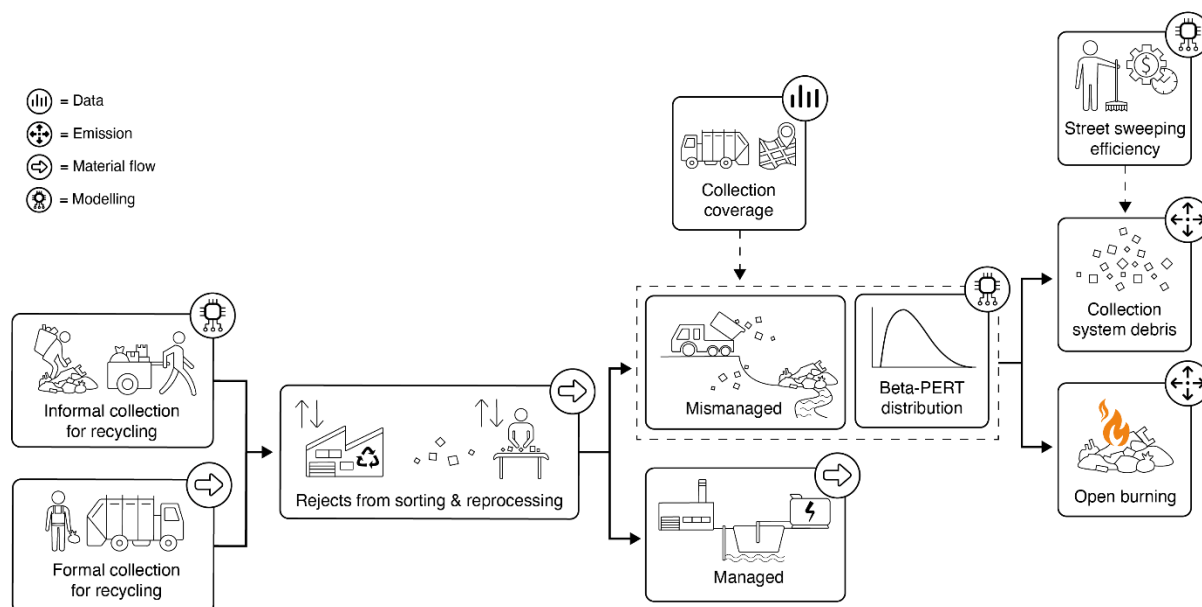

**Fig. S17.** Sub-model to estimate the quantity of rejects from sorting and reprocessing which are mismanaged.

We assumed that rejects from sorting and reprocessing (C25aa, C25ab, C26aa, C26ab) were connected to waste management collection coverage and street sweeping efficiency using **Equation S1**.

$$M_L = (100 - C2) \times \left(1 - \frac{S}{100}\right) \quad \text{Equation S1}$$

Where:

- C2 is the collection coverage from the *Full MSW MFA*;
- S is the assumed street sweeping efficiency (%) as sampled from a Beta-PERT distribution according to the parameters in **Table S35**;
- $M_L$  is the rate of mismanagement of sorting and reprocessing rejects for rigid plastic collected by informal sector (C25aa); flexible plastic collected by the informal sector (C25ab); rigid plastic collected by the formal sector (C26aa); and flexible plastic collected by the formal sector (C26ab).

# S.8.4 Proportion of plastic in formal sector collection for recycling

The amount of waste collected by the formal recycling sector is an input (tC2i) to the *Tributary MFA*. The proportion of this waste that is plastic (C16) was estimated at 8.5% based on data for the UK from Department for Environment Food and Rural Affairs (Defra)<sup>37</sup>. As no uncertainty was provided in the original source, an assumed 50% error for both low and high estimates was assigned and modelled with a Beta-PERT distribution. The amount of rigid plastic in formally collected material for recycling as a percentage of plastic collected (C22a) was assumed the same as C0a.

# S.8.5 Uncollected litter (C1)

Litter is often used as a generic term to describe waste that is in the environment with no distinction given to its emission source (point of initial release). In this work we adopt a definition which states that litter must originate from littering, defined here as: ‘*the act of discarding items of waste generated on-the-go (in the public domain) directly into the environment without it having previously been concentrated or containerised*’. This distinguishes more sparsely generated, usually single item deposits from larger deposits into the environment (open dumping), each of which will have different factors affecting the probability of movement, and the magnitude and frequency of their occurrence.

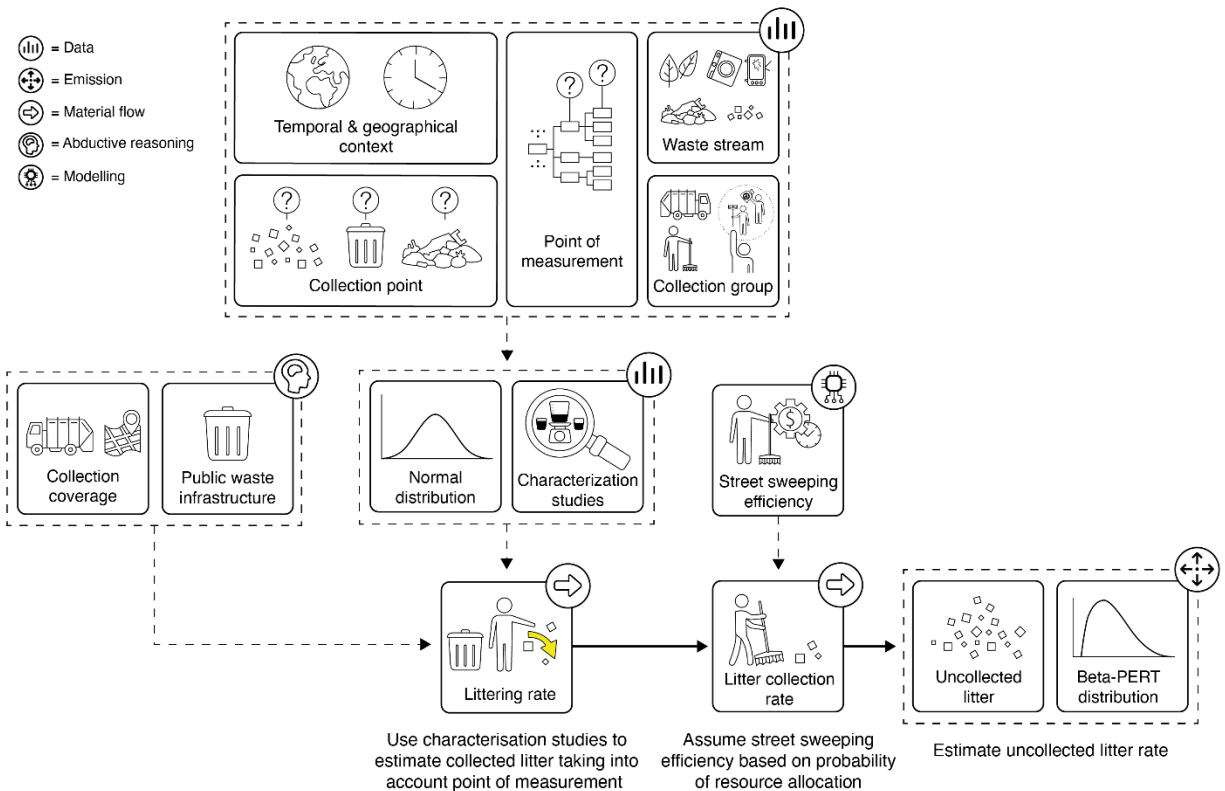

**Fig. S18.** Sub-model to estimate emissions from uncollected litter.



Published littering data is usually a measure of litter that has been collected, either via street bins, street cleansing (litter picking) or irregular environmental clean-ups (e.g., beach cleaning)<sup>290</sup>. However, the amount of litter which is uncollected is challenging to measure because it does not pass through any system of management and often becomes dispersed soon after it is emitted<sup>291,292</sup>.

To estimate the amount of *uncollected litter* (C1), we developed a sub-model as illustrated in **Fig. S18**. First, we calculated the amount of litter deposited on the floor that is subsequently collected by a municipality using measured data from Europe, termed here the *littering rate* (**Section S.8.5.1**). We then corrected the *littering rate* to estimate of *total litter* ( $L_T$ ) by dividing by an assumed street sweeping efficiency (S) for these European cities (**Section S.8.5.2**). Finally, as we had used European data to calculate the *littering rate*, we had to adjust it to be relevant for the Global South by assuming that waste receptacle provision and collection quality and efficiency was less comprehensive. We then divided the complement of the assumed street sweeping efficiency percentage to calculate the fraction which was *uncollected litter* (C1) (**Section S.8.5.3**).

#### **S.8.5.1 Littering rate**

We began by classifying data on collected litter according to the point in the system at which litter was measured, and the temporal and geographical context using a typology proposed by Elliott, et al.<sup>293</sup> as follows:

- **Collection point** – Litter is typically either measured based on what is placed in public waste bins (bin litter), or what is collected from the environment (ground litter, river litter etc.).
- **Waste stream** – Street cleansing teams may collect fly-tipped (informal open dumping on land) waste, side-waste (waste placed alongside bins), green waste (e.g., leaves), or perform street sweeping which will likely have high amounts of soil, vegetation as well as small amounts of litter. Understanding what waste streams are included in a measurement is important for both the mass and the composition.
- **Collection group** – Litter may be collected either by municipal street cleansing crews or by other groups such as commercial operators or volunteer organisations.
- **Area** – In order to extrapolate littering rates, the residential and visiting population of an area must be determined and related to a geographical area.
- **Time** – The time since any previous litter collection is important to understand to be able to infer the rate of littering.

As we required the *littering rate* to be equivalent to litter deposited on the floor, we needed to exclude other wastes which are commonly reported within the same category such as: waste deposited in bins; naturally occurring litter (e.g., leaves); non-littering sources such as fly tipping (informal open dumping); and waste which had overflowed from non-litter bins. Elliott, et al.<sup>293</sup>, reported *littering rates* from five European locations, excluding litter deposited in bins, natural litter (for example leaves, tree debris, soil, and insects) and fly-tipping (informal open dumping) (**Table S34**). Waste from overflowing bins was not mentioned therefore is likely included in the measurements, potentially resulting in double counting in our model. However, considering the data was collected across the EU where bins are relatively well managed, it is assumed this contribution is negligible.

For consistency, the *littering rate* was converted from per capita rates to as a proportion of MSW generation as used in other works<sup>2,3</sup>. This was sampled according to a normal distribution with mean of 0.81 and standard deviation 0.15 (**Table S34**).

**Table S34.** Littering rates in European cities and countries.

| Location                   | Date         | Per capita littering rate (kg·cap <sup>-1</sup> ·y <sup>-1</sup> ) | MSW generation rate** (kg·cap <sup>-1</sup> ·y <sup>-1</sup> ) | Per capita littering rate (% of MSW generation) |
|----------------------------|--------------|--------------------------------------------------------------------|----------------------------------------------------------------|-------------------------------------------------|
| Bristol, UK                | Approx. 2016 | 4.8                                                                | 479                                                            | 0.99                                            |
| Scotland, UK               | Approx. 2012 | 3.3                                                                | 483                                                            | 0.68                                            |
| East Lothian, Scotland, UK | Approx. 2012 | 4.8                                                                | 483                                                            | 0.99                                            |
| Flanders, Belgium          | 2013         | 2.72                                                               | 436                                                            | 0.62                                            |
| Flanders, Belgium          | 2015         | 3.17                                                               | 412                                                            | 0.77                                            |
| <b>Mean</b>                | -            | <b>3.76</b>                                                        | -                                                              | <b>0.81</b>                                     |
| <b>Standard deviation</b>  | -            | <b>0.87</b>                                                        | -                                                              | <b>0.15</b>                                     |

\* as reported by Elliott, et al.<sup>293</sup>; \*\* linearly interpolated to correct year based on data reported in Eurostat<sup>294</sup>; Abbreviations: Municipal solid waste (MSW).

### S.8.5.2 Total litter (L<sub>T</sub>)

The *littering rate* discussed in **Section S.8.5.1** relates only to litter that was deposited on the ground and subsequently collected by the municipality; therefore, it excludes litter that remained uncollected in the environment. To better approximate the *total litter*, including the uncollected proportion, we created another sub-model to estimate street sweeping efficiency (S), defined as the amount of litter that is collected as a proportion of *total litter* generation.

In reality, street sweeping efficiency is affected by many factors including: the method used to clean the streets; the frequency and timing of cleaning; access to the waste (including the presence of obstacles such as parked cars and vegetation); environmental conditions (e.g., wind and frequency of rainfall); and the pollutant that is being collected (e.g., litter, sediment, and leaves)<sup>295,296</sup>. However, data to evidence each of these factors are not available at global scale, so we based our model on two broad assumptions:

1. Anecdotally, street sweeping activities are more likely to occur in highly frequented and prominent places such as city centers, around tourist attractions, financial centers and in commercial areas, whilst rural areas may have less frequent street cleansing if at all. We therefore assume that street sweeping is more efficient in urban and less in rural areas.
2. By weight, the cost of street sweeping outweighs that of collection of concentrated waste from containers, particularly if drains are cleansed<sup>297</sup>. Given countries in the Global South often lack the funds to carry out basic waste collection services, it is appropriate to assume that on average, formal street sweeping activities are less comprehensive in lower income countries.

Street sweeping efficiencies and uncertainty assumed in the present work are shown in **Table S35** according to the country income category and the settlement typology of each municipality, as determined via data from the Global Human Settlement – Settlement Model (GHS-SMOD)<sup>195</sup> (**Section S.7.1**). Many of the efficiencies were assigned as negatively skewed (long tails to the

left) to account for the premise that although the majority municipalities will likely recognise the importance of street sweeping, a minority of municipalities may neglect it.

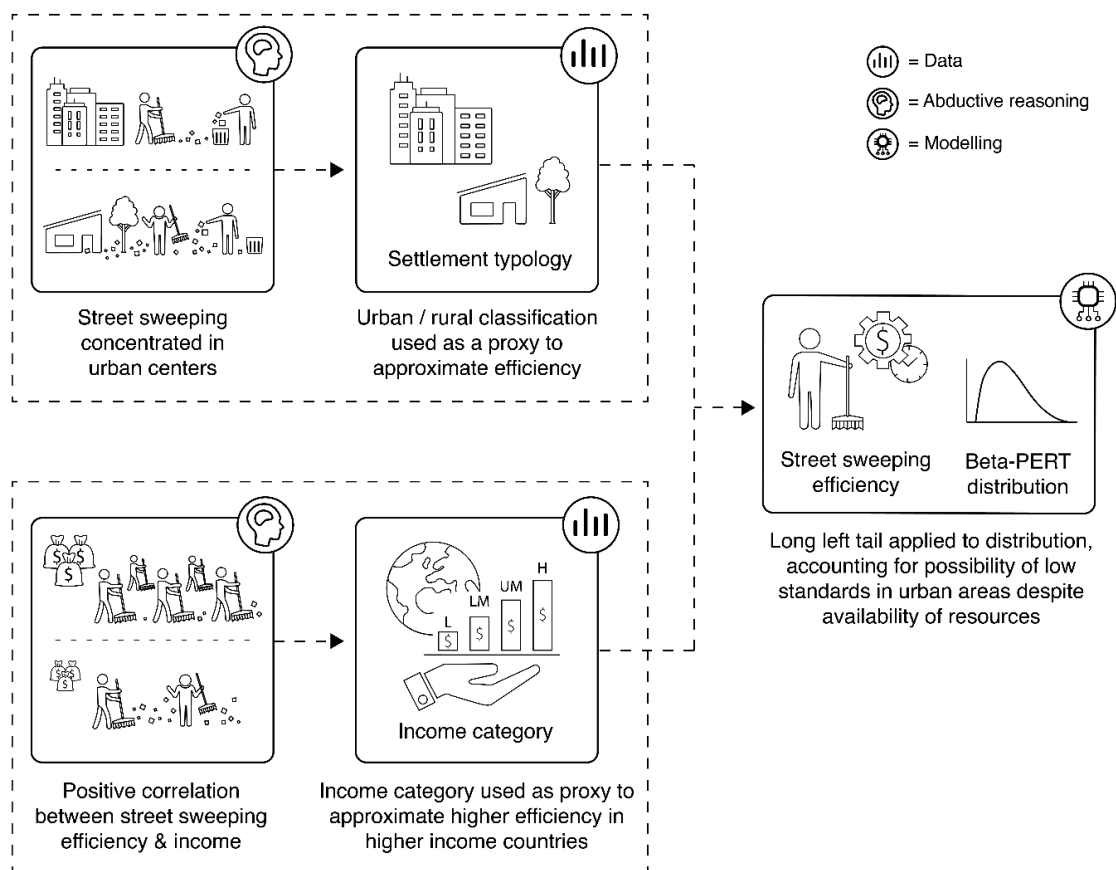

**Fig. S19.** Sub-model to estimate street sweeping efficiency across the world’s municipalities.

Given the street sweeping efficiencies in **Table S35**, the *littering rate*, which is based solely on European data (**Table S34**), was corrected to an estimate of *total litter* by dividing by the street sweeping efficiency, as sampled for a HIC assuming a semi-dense urban settlement typology and a Beta-PERT distribution.

**Table S35.** Assumed street-sweeping efficiencies (% wt. ar) by country income category and settlement typology<sup>195</sup>.

| Income category | Settlement typology | Minimum efficiency (%) | Most likely efficiency (%) | Maximum efficiency (%) |
|-----------------|---------------------|------------------------|----------------------------|------------------------|
| HIC             | Urban centre        | 90                     | 99                         | 100                    |
|                 | Dense urban         | 80                     | 97.5                       | 99                     |
|                 | Semi-dense urban    | 70                     | 95                         | 97.5                   |
|                 | Suburban            | 60                     | 92.5                       | 95                     |
|                 | Rural               | 50                     | 90                         | 92.5                   |
| UMC             | Urban centre        | 80                     | 95                         | 100                    |
|                 | Dense urban         | 50                     | 80                         | 85                     |

| Income category | Settlement typology | Minimum efficiency (%) | Most likely efficiency (%) | Maximum efficiency (%) |
|-----------------|---------------------|------------------------|----------------------------|------------------------|
| LMC             | Semi-dense urban    | 20                     | 70                         | 75                     |
|                 | Suburban            | 0                      | 50                         | 55                     |
|                 | Rural               | 0                      | 20                         | 25                     |
|                 | Urban centre        | 50                     | 80                         | 90                     |
|                 | Dense urban         | 20                     | 60                         | 70                     |
|                 | Semi-dense urban    | 0                      | 20                         | 30                     |
|                 | Suburban            | 0                      | 10                         | 20                     |
| LIC             | Rural               | 0                      | 5                          | 15                     |
|                 | Urban centre        | 0                      | 20                         | 30                     |
|                 | Dense urban         | 0                      | 0                          | 5                      |
|                 | Semi-dense urban    | 0                      | 0                          | 5                      |
|                 | Suburban            | 0                      | 0                          | 5                      |
| LIC             | Rural               | 0                      | 0                          | 5                      |

Abbreviations: Low-income country (LIC); high income country (HIC); lower middle-income country (LMC); upper middle-income country (UMC).

### S.8.5.3 Uncollected litter (C1)

The proportion of *uncollected litter* (C1) for each municipality was divided by the complement of the street sweeping efficiency to calculate *total litter*. Street sweeping efficiencies (S) were in turn calculated for each municipality by sampling from Beta-PERT distributions according to the values in **Table S35** and weighting these by the percentage of the population living in each settlement typology. GHS-SMOD level two rural classifications of ‘rural cluster’, ‘low density rural’, ‘very low density rural’ and ‘water’ were simplified here to a single ‘rural’ classification.

The *total litter* calculated in **Section S.8.5.2** is based on European data and cannot be assumed representative of all global municipalities, particularly given many municipalities may provide fewer public waste infrastructure than for the European cities. Accordingly, a further correction was required to estimate the *total litter* for all global municipalities. In the absence of data on the provision of public waste infrastructure, the collection coverage (tC1) of the municipality was used as a proxy. The *uncollected litter* for each municipality was then estimated using **Equation S2**.

$$C1 = L_T \times \left(1 + \log\left(\frac{100}{tC1}\right)\right) \times \left(1 - \frac{S}{100}\right) \quad \text{Equation S2}$$

Where:

- $L_T$  is the *total litter* (% of MSW generation) estimated based on European data as described in **Section S.8.5.2**.
- tC1 is the collection coverage, used here to estimate *total litter* in a global context.
- S is the street sweeping efficiency (%) calculated as the weighted sum of its population by settlement typology as sampled from a Beta-PERT distribution according to the values in **Table S35**.

### S.8.6 Proportion of plastic and rigid plastic in uncollected litter (C11 and C11a)

The *secondary data inputs* relating to the proportion of litter that is plastic (C11) and rigid plastic (C11a) were obtained from a study of the composition of litter in Wales<sup>36</sup>. The author sampled litter both in waste bins and that picked from the ground. The composition of litter picked from the ground is likely to be more applicable to the uncollected litter used here, therefore only this data was used in this analysis. On a weight basis and excluding the collection sacks, plastic as a proportion of litter (C11) was on average 17.7% with a minimum of 13.8% and maximum of 20.4%. On the other hand, the proportion of this plastic that is rigid was on average 72.9% with a minimum of 69.1% and a maximum of 76%. These values were converted into PDFs for the probabilistic MFA using a Beta-PERT distribution with shape factor of four.

### S.8.7 Uncollected MSW (C2)

Uncollected MSW differs from littering in that it has been concentrated (i.e., not an individual item), usually in a premises (household or business) and occurs in the context where waste collection services are either un-affordable or unavailable. Likewise, unlike littering, uncollected waste may be open burned or purposely dumped in a specific location (e.g., rivers, disused land etc.). The mass of uncollected waste was determined based on the complement of the collection coverage (C2) and as such is calculated directly in the *Full MSW MFA* as part of process P4 (**Fig. S5**). The proportion of uncollected waste that is openly burned compared to dumped into the environment as debris emissions is discussed in **Section S.8.11.1**

### S.8.8 Debris emissions from collection system (C3)

The act of storing, collecting, and transporting MSW to recovery or disposal facilities is grouped here by the term ‘collection system’. Emissions of debris can occur at several points in this system; for example, by blowing out of bins, being dropped as it is loaded into vehicles, or by falling from collection vehicles. The authors have found no reliable quantification of these emissions into the environment; therefore, emissions were estimated via a sub-model (**Fig. S20**).

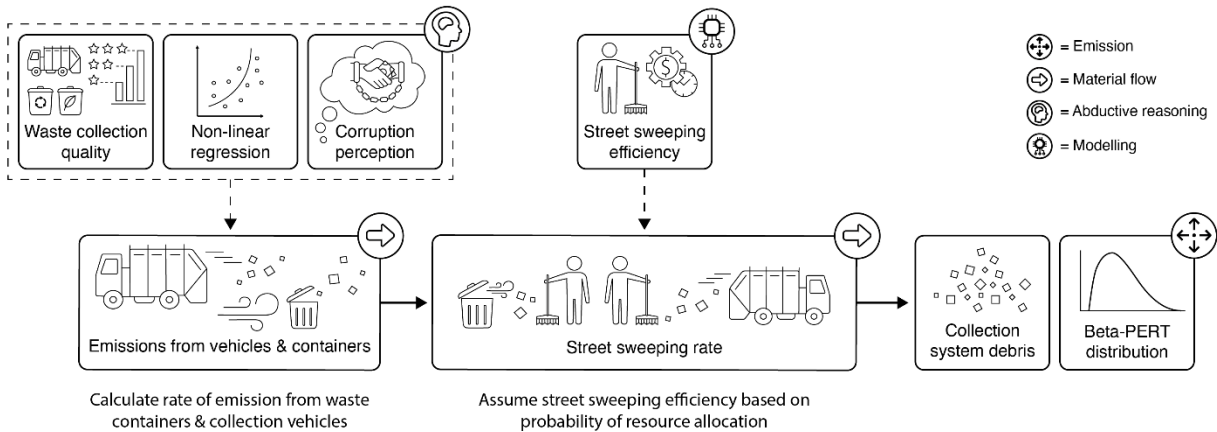

**Fig. S20.** Sub-model to estimate emissions from collection systems.

Firstly, we assumed that emissions from the collection system were proportional to the quality of the collection. This quality of collection is an indicator measured in the Wasteaware Cities Benchmark Indicators (WABI) toolkit<sup>38</sup> based on assessment of criteria, including the appearance of waste collection points and the effectiveness of transport. Recent analysis has demonstrated the strong link between socio-economic development, as measured through relevant indices, and solid waste management performance as measured by WABI for waste generation, collection coverage, quality of collection, controlled recovery and disposal and environmental protection<sup>40</sup>. Non-linear regression identified the strongest predictor for waste collection quality was that of the corruption perception index (CPI). Municipal data on CPI (**Section S.7.1**) was therefore used to predict the quality of collection for all municipalities according to the curve described by **Equation S3**, as derived from Velis, et al.<sup>40</sup>:

$$\text{Quality of collection} = 20.7 + 35.4 \log(\text{CPI}) \quad \text{Equation S3}$$

The quality of collection was used to predict emissions from the collection system as a proportion of waste collected prior to any street sweepings (C3i) by linearly interpolating between assumed emissions for a best (100% quality collection) and worst (0% quality of collection) scenario. It was estimated that in a best-case scenario, 0% of the waste for collection is emitted into the environment, whereas for a worst-case scenario 5% of waste for collection is emitted (1% low estimate, 15% high estimate). A Beta-PERT distribution was used to model the uncertainty around these emissions.

Lastly, to account for waste which was emitted from the collection system and then subsequently collected, the sampled emission rate (C3i) was multiplied by the complement of the street sweeping efficiency for the relevant settlement typology and income category listed in **Table S35**. This is summarised in **Equation S4**.

$$C3 = C3i \times \left(1 - \frac{S}{100}\right) \quad \text{Equation S4}$$

Where:

- C3 is the emissions from the collection system (after street sweeping) – (% of collected waste)
- C3i is the emissions from the collection system (before street sweeping) – (% of collected waste)
- S is the street sweeping efficiency (% of emitted waste)

The proportion of the collection system emissions that is plastic (C13) was assumed equal to the proportion of MSW that is plastic (C0). Likewise, the proportion of these plastic emissions that are rigid plastic (C13a) was assumed to be the same as the proportion of rigid plastic in MSW (C0a).

### **S.8.9 Debris emissions from uncontrolled disposal of MSW (C9)**

Solid waste is emitted into the environment from uncontrolled disposal sites in two ways: 1) as debris (physical material); and 2) via open burning (combustion in open uncontrolled fires). As

far as we are aware, no works have reliably measured these emissions from land disposal sites. Yadav, et al.<sup>298</sup> proposed a conceptual framework for estimating debris emissions from specific land disposal sites based on their physical structure, geographical and topological context and meteorological conditions. Gathering that level of data for all global land disposal sites would be infeasible. Therefore, we developed a simplified conceptual model to estimate the probability of debris emission because of how much plastic waste was exposed to wind and surface water runoff and therefore how much is likely to mobilise and be transported into the environment (Fig. S21).

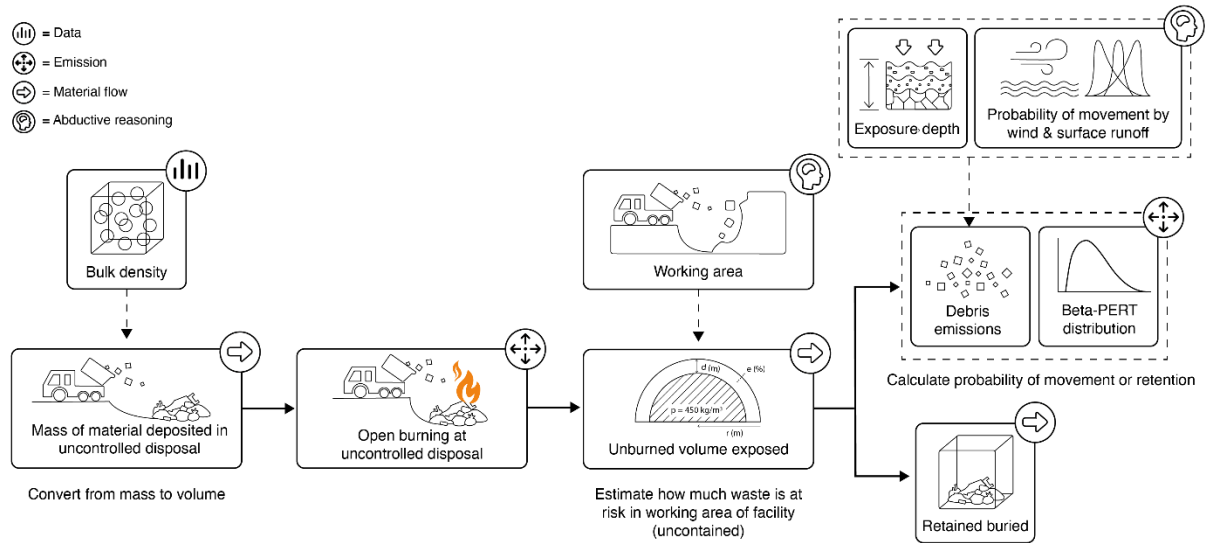

**Fig. S21.** Sub-model for estimating emissions from uncontrolled disposal.

We assumed that most emissions occur on freshly deposited waste whilst it is still relatively loose and before any settling or compaction (natural or mechanical) takes place. Therefore, only the ‘working area’ (‘working face’) was quantified, meaning the part of the site where waste is deposited, manipulated, or in the case of sites where the informal sector operate, recovered from.

To calculate the proportion of waste that is exposed, assumptions about typical dimensions of the working area of uncontrolled disposal sites were posited. These included the dumpsite shape, working area, bulk density, and exposure depth (Fig. S22). Simple geometry calculations enabled the volume, mass, and surface area of the dumpsite to be derived, the latter of which was multiplied by the exposure depth and bulk density to arrive at an approximation for exposed mass. This exposed mass was multiplied by an assumed emission rate to derive the mass emitted, which when divided by the overall mass gives the emissions as a percentage of uncontrolled unburned disposal (C9).

A hemisphere shape was chosen based on its simplicity and broad similarity with dumpsite profiles, whilst the bulk density ( $\rho$ ) was assumed constant at  $450 \text{ kg}\cdot\text{m}^{-3}$  (299,300). The working area radius ( $r$ ), exposure depth ( $e$ ) and emission rate for exposed waste are all highly uncertain parameters, and therefore were varied according to best estimates to provide low, mid and high point estimates. For instance, as the working area radius increases, the surface area to volume

ratio decreases, leading to lower exposed mass as a percentage of total mass. The low emission estimate had a larger working radius of 50 m, as opposed to 30 m in the central estimate and 10 m in the high estimate. Alternatively, as the exposure depth increases, so do the calculated emissions, therefore a low estimate assumed a value of 10 cm, mid estimate of 20 cm and high estimate of 30 cm. These values are all on the same order of magnitude as typical waste items under the assumption that once an item is covered by another, its exposure to wind and surface water is nullified. Lastly, the emission rate was assumed as 1% in a low estimate, 2% mid-estimate and 3% high estimate. These values gave the overall emissions from uncontrolled disposal as a proportion of disposed waste as: 0.006% (low-estimate), 0.04% (mid-estimate) and 0.45% (high-estimate) which were assigned a Beta-PERT distribution. Although these numbers may seem small, it should be noted that disposal sites contain large amounts of waste, therefore even small emission rates can lead to large overall masses of waste being emitted into the environment. Similarly, the distribution of estimates shows that whilst the central estimate of 0.04% is relatively small, the high estimate leads to a high right-skewed distribution signifying large emission rates may be possible although less likely.

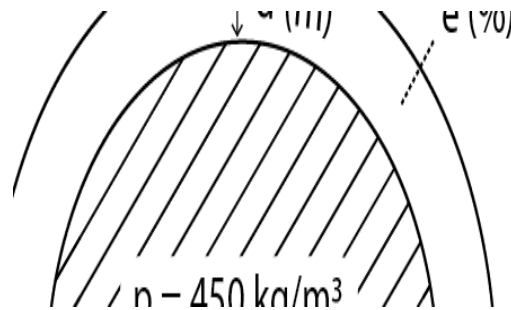

**Fig. S22.** Conceptual model for calculation of exposed mass in an uncontrolled disposal site. Abbreviations:  $r$  is the dumpsite working radius (m),  $\rho$  is the bulk density of waste ( $450 \text{ kg}\cdot\text{m}^{-3}$ ),  $d$  is the exposure depth (m) and  $e$  is the emission rate (% of exposed waste).

### S.8.10 Plastic (C14) and rigid plastic (C14a) in disposal debris emissions

The proportion of the uncontrolled disposal debris emissions that are plastic (C14) was assumed based on the hypothesis that lighter materials are those most susceptible to release, particularly by wind. It is therefore likely that both paper and plastic are the items predominantly released at disposal sites. Without any available data to inform this split, it was assumed 50% of emissions are plastic (40% minimum, 60% maximum). Likewise, given that plastic most susceptible to movement by wind are likely plastic films, the proportion of plastic emissions taken to be rigid plastic (C14a) was assumed as 10% (5% minimum, 15% maximum). Lastly, each of these disposal debris emission variables were converted into PDFs by assuming a Beta-PERT distribution.



## S.8.11 Open burning

### S.8.11.1 Open burning of uncollected waste (C10)

Data to estimate the mass of MSW burned in open uncontrolled fires (C10) are scarce and seldom robust, being driven by assumptions and expert judgement<sup>301</sup>. Therefore, it was necessary to build a sub-model which combined activity data from census and surveys with income category and settlement typology data to estimate the prevalence of the practice in each of the world's municipalities (**Fig. S23**).

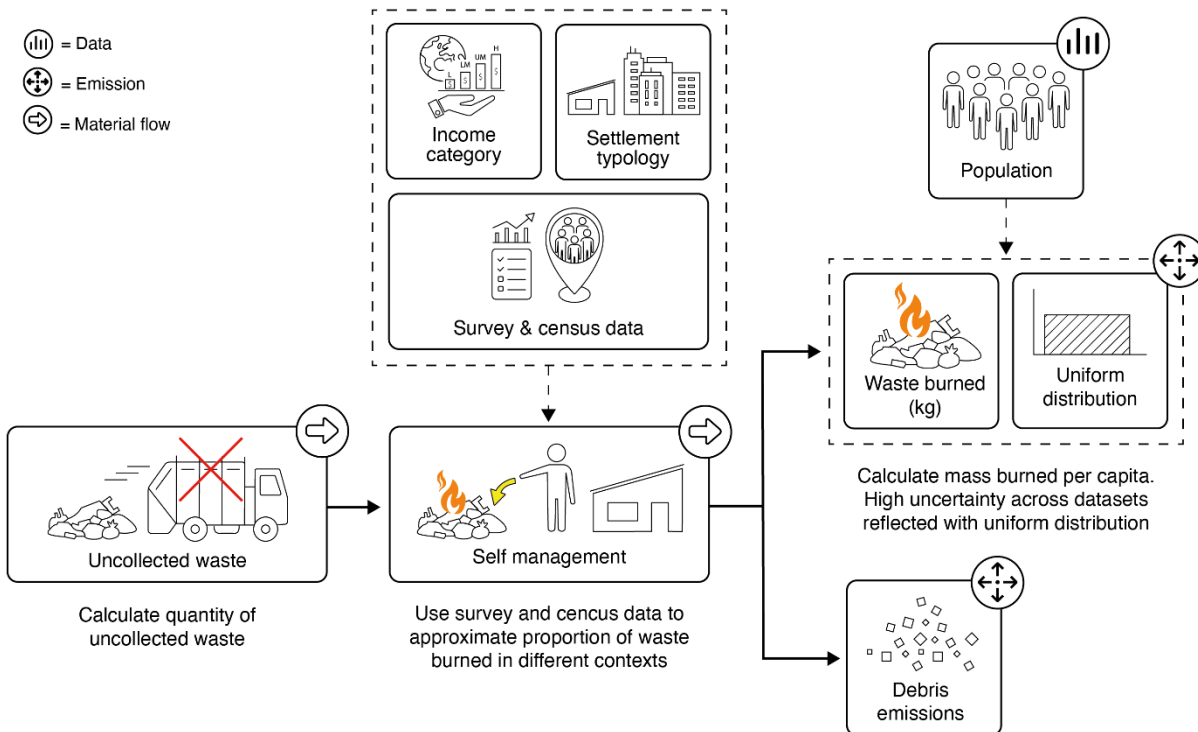

**Fig. S23.** Sub-model for estimating open burning emissions from uncollected waste.

We collected census and health survey data that queried waste management practices in 44 countries, spanning from 1996-2021<sup>302-334</sup>. In the absence of data on the mass of waste burned in open uncontrolled fires, we used these activity data as a proxy for the amount of waste burned. In agreement with several authors<sup>5,30,290</sup>, we found that the amount of uncollected waste in a system reduces as a country's income increases (**Fig. S24A**) and that uncollected waste is far higher in rural areas compared to urban areas (**Fig. S24B**). In this context, we also make three observations about the amount of waste burned in the Global South: (1) The range of data for both open burning (as proportion of uncollected waste) and uncollected waste in LMCs is large, indicating huge variation in practices within that income category; (2) As a proportion of the total waste generated in LICs (where waste collection rates are generally higher in major cities but virtually absent in many rural areas - **Fig. S24B**), waste burning is slightly lower than LMCs, which in

turn are slightly higher than UMCs (**Fig. S24C**); and **(3)** As a proportion of uncollected waste (**Fig. S24E**), the amount of waste burned appears to increase as collection coverage increases. Observations **(2)** and **(3)** indicate a development of practices and behaviour that approximately correlates with increased wealth. It appears that as economic development progresses, societies focus their efforts on reducing terrestrial and aquatic dumping rather than open burning. Two reasons are suggested: **(A)** That regulators and policy-makers concentrate on reducing terrestrial and aquatic debris due to its visual unsightliness rather than on open-burning which rightly or wrongly is considered to have made the waste ‘disappear’; and **(B)** That the open-burning of waste is overlooked by waste authorities and treasuries, because it reduces the cost of collection, treatment and disposal.

The rate of open burning (as proportion of total waste) in LMCs and UMCs is much higher in rural areas (**Fig. S24D**), whereas in LICs, rural burning occurs at a slightly lower rate compared to urban. It is suggested that this is because LICs have less capacity to enforce regulation on open burning in cities, with this only improving once a country has sufficient resources to fund its environmental regulators sufficiently.

The narrative that open burning varies with income category and settlement typology is plausible, and we have substantial data to support it circumstantially<sup>302-334</sup>. However, the data do not fit a normal distribution and the ranges are large in some cases. On the basis that our model requires open burning data using uncollected waste as a denominator, and acknowledging the large range, we applied a uniform distribution between the ranges (excluding outliers defined as values greater than 1.5 times the interquartile range distance from the 25<sup>th</sup> and 75<sup>th</sup> percentiles) for each of the income categories and urban-rural contexts presented in **Fig. S24F**. This decision allows for the observed variation between and within countries to be incorporated into the probabilistic MFA, whilst acknowledging the variation between income categories and settlement typology. The uniform distribution for each municipality was weighted by the urban to rural population.

Data to evidence the amount of waste which is open burned in HICs is extremely limited, and we found a large range (1.2-66.7% wt. of uncollected waste) between the three data points we obtained<sup>302,304,308</sup>, all of which were for small island states (Anguilla, Trinidad and Tobago and Cook Islands). Urban-rural data were unavailable, and there are arguments that indicate that waste is burned in both cities and the countryside within high income countries. For instance, KANTAR<sup>335</sup> reported similar rates of outdoor burning in the UK between urban and rural areas and the difference between indoor burning. Therefore, we applied the range (1.2-66.7% wt. of uncollected waste) to both urban and rural areas with a uniform distribution for all HICs.

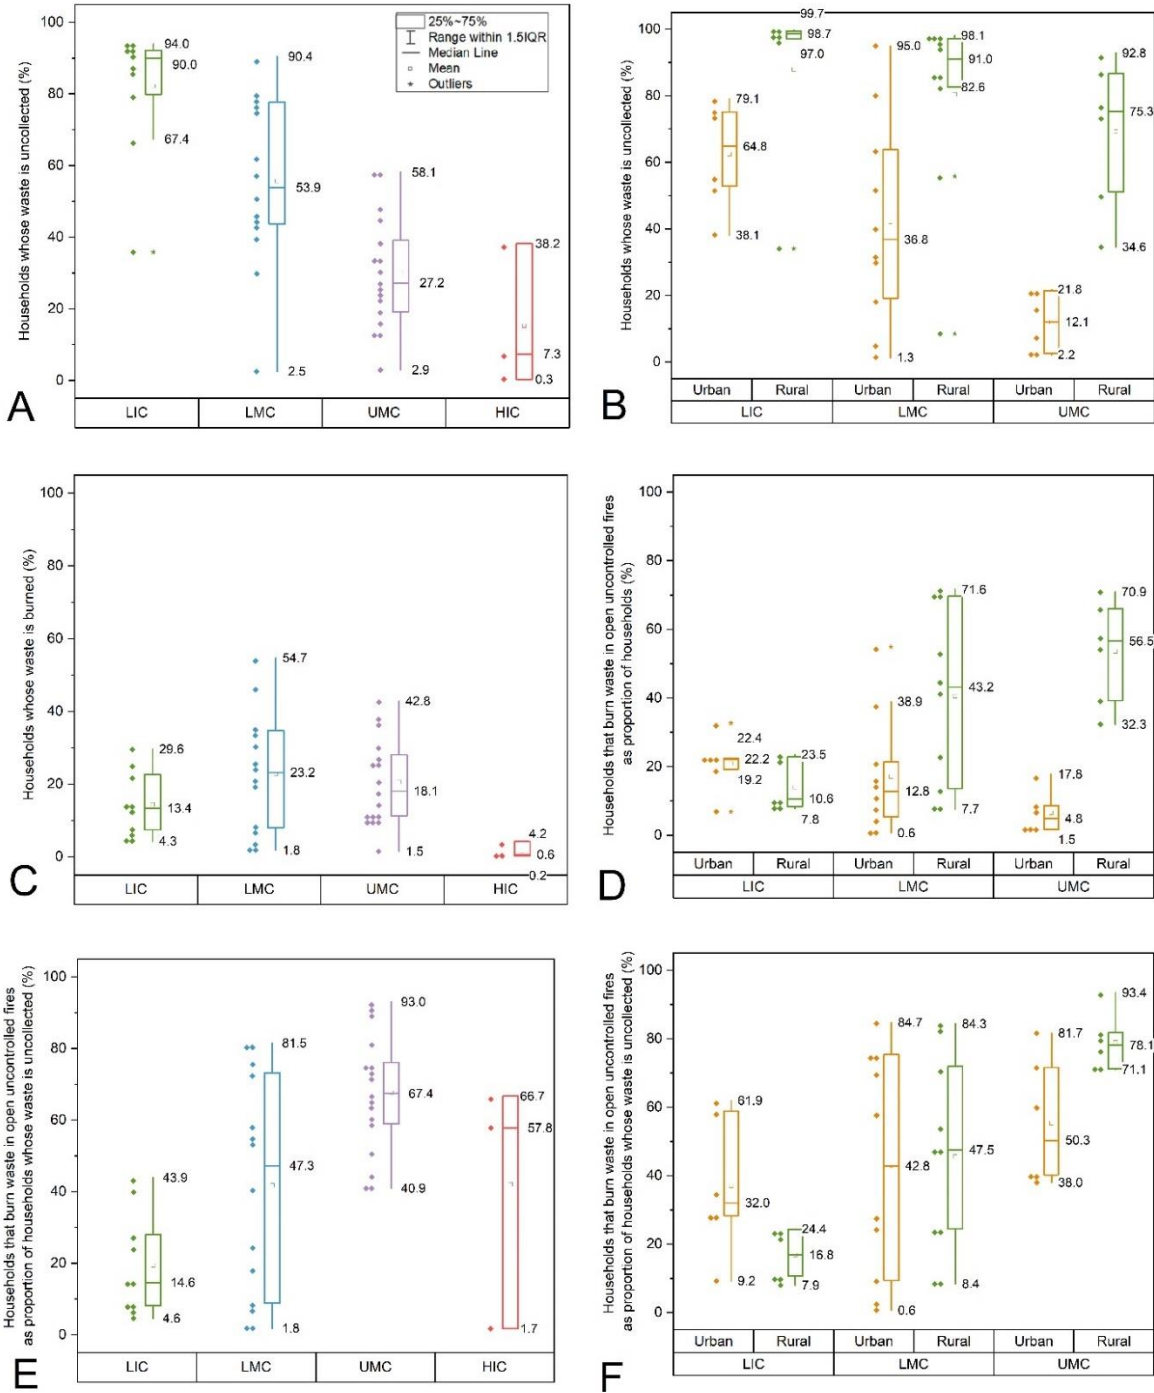

**Fig. S24.** National average census and survey data (n=44 countries) and country level urban-rural data (n=22 countries) showing: (A, B) proportion of householders who reported that waste is uncollected; (C, D) proportion of householders who reported burning their waste in open uncontrolled fires; (E, F) proportion of householders who reported burning their waste in open uncontrolled fires, as a proportion of households whose waste is uncollected. Abbreviations: Low-income country (LIC); lower middle-income country (LMC); upper middle-income country (UMC); high-income country (HIC); inter-quartile range (IQR)<sup>301</sup>.

### S.8.11.2 Open burning of rejects from sorting and reprocessing (C27aa, C27ab, C28aa, C28 ab)

As the open burning of mismanaged rejects from sorting and reprocessing is generally an illegal practice, there is no data to estimate its prevalence. Therefore, here, as an approximation we assumed that it takes place at the same rate as for open burning of uncollected waste at household level for rigid plastic collected by informal sector (C27aa); flexible plastic collected by the informal sector (C27ab); rigid plastic collected by the formal sector (C28aa); and flexible plastic collected by the formal sector (C28ab).

### S.8.11.3 Open burning at uncontrolled disposal sites (C8)

Determining the mass of waste burned at uncontrolled disposal sites is a highly challenging exercise. Landfill / dumpsite fires may be started deliberately or spontaneously<sup>25</sup>, with a high variability between events, influenced by management practices which vary substantially between and within countries and regions<sup>6</sup>. Anecdotally, most dumpsites have at least one daily fire, and many are permanently on fire<sup>336</sup>. Even in HICs with highly controlled systems such as the UK, it has been reported that there is at least one fire ablaze on a landfill somewhere<sup>337</sup>.

Five estimates of the mass of waste open burned are presented in **Table S36**, alongside the methods used to determine them. All these methods result in highly uncertain outcomes, being strongly driven by assumptions or the judgement of the authors. The Swaziland model<sup>338</sup> is the only one to have modelled at a local scale. The assumptions were based on interviews with the officials who operated the land disposal sites, so the data are considerably more robust than the other models which used assumptions. Moreover, because the data were provided across all the states in the country, we were able to determine the range. We therefore took the mean mass combusted for the whole country (8.6% wt.) and the upper and lower quartiles (0% and 80.2% wt.) and assumed a Beta-PERT distribution.

**Table S36.** Estimates of waste plastics mass open burned in land disposal sites worldwide.

| Country   | Year | Income category | Proportion (wt.) | Statistic                                             | Denominator      | Method                                                                                                              | Source         |
|-----------|------|-----------------|------------------|-------------------------------------------------------|------------------|---------------------------------------------------------------------------------------------------------------------|----------------|
| China     | 2017 |                 | 38%              | Not stated                                            | Dumpsites        | Not stated                                                                                                          | <sup>339</sup> |
| Global    | 2014 | LMC, LIC, UMC   | 60%              | Mean                                                  | Dumpsites        | Material flow analysis based on IPCC <sup>340</sup> assumptions                                                     | <sup>341</sup> |
|           |      | HIC             | 13%              |                                                       |                  |                                                                                                                     |                |
| India     | 2010 | LMC             | 10%              | Mean                                                  | Dumpsites        | Interviews with officials                                                                                           | <sup>342</sup> |
| Poland    | 2021 | HIC             | 4.3%             | Mean                                                  | Landfilled waste | Extrapolation from firefighting service records reported by Białowicz, et al. <sup>343</sup> combined               | <sup>343</sup> |
| Swaziland | 2017 | LMC             | 8.6% (0%, 80.2%) | Mean (Upper, lower quartiles of provincial estimates) | Dumpsites        | Used waste management data, combustibility estimates based on composition and estimates of how much waste is burned | <sup>338</sup> |

## 1897 **S.9 Probabilistic material flow analysis (MS7)**

1898 Material flow analysis is a well-established method for the quantification of material flows  
1899 within a system. It has been used extensively in many disciplines, for example to quantify the  
1900 flow of materials through societal systems or for assessing exposure to harmful substances in the  
1901 environment<sup>344</sup>. A core feature of material flow analysis is the conservation of mass, which  
1902 requires the modeller to find ways to account for all material within the system boundary<sup>345</sup>. This  
1903 means a great deal of data may be required to model complex systems, which can be challenging  
1904 to obtain<sup>346</sup>. Frequently, assumptions are used in place of measured process (activity) data<sup>347</sup>  
1905 which can result in greater uncertainty in models<sup>348</sup>.

1906 Probabilistic material flow analysis overcomes some of these challenges by ascribing uncertainty  
1907 to the input parameters of a model<sup>349</sup>. This uncertainty is then propagated through the system to  
1908 enable the user to assess the probability distribution around the various flows and processes. One  
1909 way to achieve probabilistic material flow analysis is to perform Monte Carlo analysis, a  
1910 stochastic method that requires probability density functions to be applied to model inputs. The  
1911 material flow model is then repeated for many iterations, each one sampling randomly from the  
1912 input PDFs. Results are then summarised as probability distributions which can be analysed  
1913 according to the requirements of the user. Probabilistic material flow analysis has been applied  
1914 successfully to assess plastic pollution, circular economy and many other material and substance  
1915 flow systems<sup>350-355</sup>.

1916 As described in **Section S.4 (Fig. S4 - Fig. S8)**, material flows were quantified across three  
1917 systems using probabilistic material flow analysis. Predictions from the random forest were used  
1918 as its inputs to the *Tributary MFA* so that the major, measured, and readily reported formal flows  
1919 of MSW could be quantified. The process masses calculated in the *Tributary MFA* were then  
1920 used as inputs into the second MFA, the *Full MSW MFA*. This MFA builds upon the *Tributary*  
1921 *MFA* to include flows that are not typically measured by municipalities, such as informal sector  
1922 collection of recyclables, and emissions of waste into the environment. These extra processes  
1923 were calculated using the coefficients described in **Section S.7**, informed by sub-models  
1924 described in **Sections S.8.2, S.8.3, S.8.3.4, S.8.5, S.8.5.2, S.8.8, S.8.9, S.8.11.1 and S.9.1.2**.

1925 **The results of the *Full MSW MFA*** were used to populate the *Plastics MFA* which converted the  
1926 full MSW fraction to plastic in both rigid and flexible formats. These conversions were again  
1927 achieved using the coefficients described in **Section S.7**. A full list of equations used in all the  
1928 MFAs is included in **Supplementary Table 2**.

1929 The probabilistic nature of the MFA was implemented using Monte Carlo analysis with 5,000  
1930 iterations. This meant that each of the 50,702 municipalities had 5,000 separate MFAs generated,  
1931 whereby the input data for each MFA was randomly sampled from probability density functions  
1932 and random forest predictions (**Section S.9.1**). The minimum, lower quartile, median, mean,  
1933 upper quartile and maximum values of the MFA results for each municipality were then used to  
1934 summarise the outputs and uncertainty.

1935 The number of iterations deemed suitable was deduced by repeatedly implementing the  
1936 probabilistic MFA with increasing number of iterations and recording the point at which the

average overall plastic emissions into the environment varied by less than 0.1% compared to the previous iteration (**Fig. S25**).

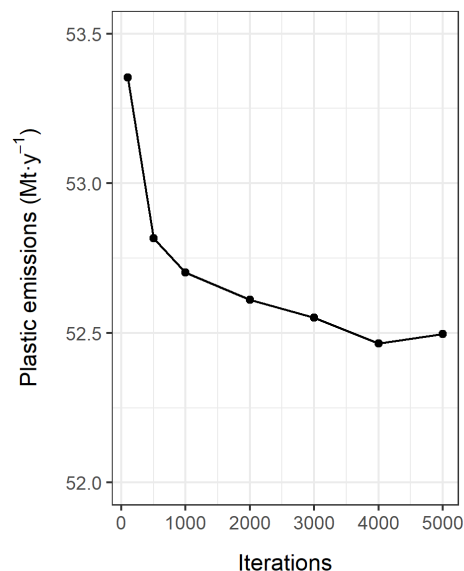

**Fig. S25.** Comparison of global plastic emissions (Mt·y<sup>-1</sup>) versus number of iterations used in the probabilistic material flow analysis (MFA) showing results stabilise ~5000 iterations.

## S.9.1 Data inputs

We chose 2020 as the baseline year for our model to enable best relevance to the UN Treaty on Plastic Pollution, agreed in 2022 through Resolution UNEP/EA.5/Res.14<sup>356</sup> and being negotiated by the International Negotiating Committee (INC)<sup>357</sup> in 2023. The choice of year was adopted tentatively as it is towards the top of the range (2006-2021) of our *primary input data*, which would ideally have been more recent. Though our decision introduced some small error to our model because waste management practices and behaviours change over time, we balanced that against the need to apply our data to a contemporary demographic. Therefore, population and settlement typology for the year 2020 was calculated for each municipality from the Global Human Settlement Population dataset (GHS-POP)<sup>183</sup> according to the method described in (**Section S.7.1**). It is anticipated that future iterations of our model will be implemented with more up-to-date primary data collected using the UN-Habitat<sup>6</sup> SDG11.6.1 estimator Waste Wise Cities Tool (WaCT) data collection protocol, which is currently deployed world-wide, and with which our approach is fully compatible.

### S.9.1.1 Random sampling of primary input data

The quantile regression random forest method (**Section S.7.3**) was chosen as it allows uncertainty to be incorporated into the random forest predictions used in the *Tributary MFA* (**Section S.4.1**) by retaining the full conditional distribution of each response variable. Samples were randomly drawn from the conditional distribution with replacement equal to the number of iterations. Sample values that were more than 1.5 times the interquartile range from the upper and lower quartiles (i.e., outliers) were replaced with randomly sampled non-outlier values to

1963 avoid biasing the probabilistic results, for instance by having an overly large influence on the  
 1964 mean value of bounded variables. Occasionally random samples of the predictions for formal  
 1965 recycling (tC2i), other recovery (tC2ii) and incineration (tC2iii) summed to over 100%. To  
 1966 ensure mass balance in the material flow analysis these values were normalised to 100%.

1967 A demonstrable example of the need for this correction of outliers would be our sampling of  
 1968 collection coverage (tC1) for an affluent urban municipality in a HIC. The input data related to  
 1969 such a municipality would suggest a collection coverage of 100%, and indeed the random forest  
 1970 predictions may predict 100% collection coverage in most samples. However, a few predictions  
 1971 may be below 100%, perhaps because an influential independent variable was not randomly  
 1972 selected during decision tree construction (remembering quantile regression forest retains the full  
 1973 conditional response). In this example, these few predictions would slightly reduce the mean  
 1974 collection coverage. However, because emissions are sensitive to collection coverage in our  
 1975 model (**Section S.10**), they would be overestimated in some cases. We argue this phenomenon is  
 1976 an inevitable artifact of the stochastic nature of the quantile regression random forest and  
 1977 probabilistic material flow analysis. We therefore believe that the correction is valid. It should  
 1978 be noted that when genuine uncertainty exists in a variable's predictions (e.g., the predictions of  
 1979 collection coverage for a municipality have high variance), the interquartile range would be large  
 1980 therefore the number of outliers would likely be minimal, and this correction would have  
 1981 negligible impact.

1982 The correction for outlier values was applied to all *primary input variables* except for waste  
 1983 generation rate (tP1<sub>pc</sub>) and controlled disposal (tC3). For waste generation rate, a density  
 1984 function of the full conditional response was estimated using the '*density*' function in R and  
 1985 assuming a bandwidth determined by the 'nrd0' method and a Gaussian smoothing kernel.  
 1986 Samples were then randomly drawn from the density function and outliers removed as with other  
 1987 *primary input variables*. This adapted method, applied to the waste generation rate, has the  
 1988 advantage that predictions do not necessarily have to be the same as those supplied in the  
 1989 training data, but instead can vary according to the fitted density function. On the other hand, this  
 1990 approach was not applied to the other *primary input variables* as they are percentages between  
 1991 0% and 100%, and often have a high frequency of values located near the bounds. For example,  
 1992 many of the data for incineration had a value of 0%, whereas many of the collection coverage  
 1993 values were reported as 100%. Fitting a Gaussian density function to these values would assign  
 1994 high probabilities to the values approaching the bound, leading to these being sampled to a  
 1995 greater extent. Referring again to the example of collection coverage, when most predictions for  
 1996 a municipality equalled 100%, practically this meant values of 99% and above were sampled  
 1997 instead of 100%. Although this was a small difference, even small amounts of uncollected waste  
 1998 can have big implications on the overall emissions predicted; therefore, this approach was  
 1999 avoided.

2000 Of the 361 *primary input data* points for controlled disposal of MSW (tC3), 303 (84%) were  
 2001 either 0% or 100%. This meant that the full conditional response of predictions often spanned the  
 2002 entire range as it was highly probable that at least some trees in the random forest would predict  
 2003 both bounds. To avoid artificially high uncertainty of predictions, as would be the case with a  
 2004 bimodal distribution of the data, the prediction was treated in a similar manner to a classification  
 2005 problem whereby the majority result was used. This meant that uncertainty was not predicted for  
 2006 the uncontrolled disposal variable, however, it resulted in relatively high accuracy with 82% of

the predicted values matching the actual value for the random forest test dataset. If this approach had not been used, and instead the full conditional response used as with other *primary input variables*, many of the iterations of the probabilistic MFA would have artificially predicted uncontrolled disposal in countries where this is highly unlikely and vice versa.

### S.9.1.2 Correction of primary input variable predictions by settlement typology

Waste management data collection in rural areas of the Global South is a largely neglected endeavour, despite evidence that rural areas have generally poor waste management services and are a source of plastic pollution<sup>358</sup>. As a consequence, most of our *primary input data* were obtained from urban areas (**Section S.6.1-S.6.2**), meaning rural areas were under-represented in our dataset. Given this data paucity, it was infeasible to expand the *primary input data* to include more rural areas. Instead, we corrected each randomly sampled prediction ( $V_u$ ) using a sub-model (**Fig. S26**).

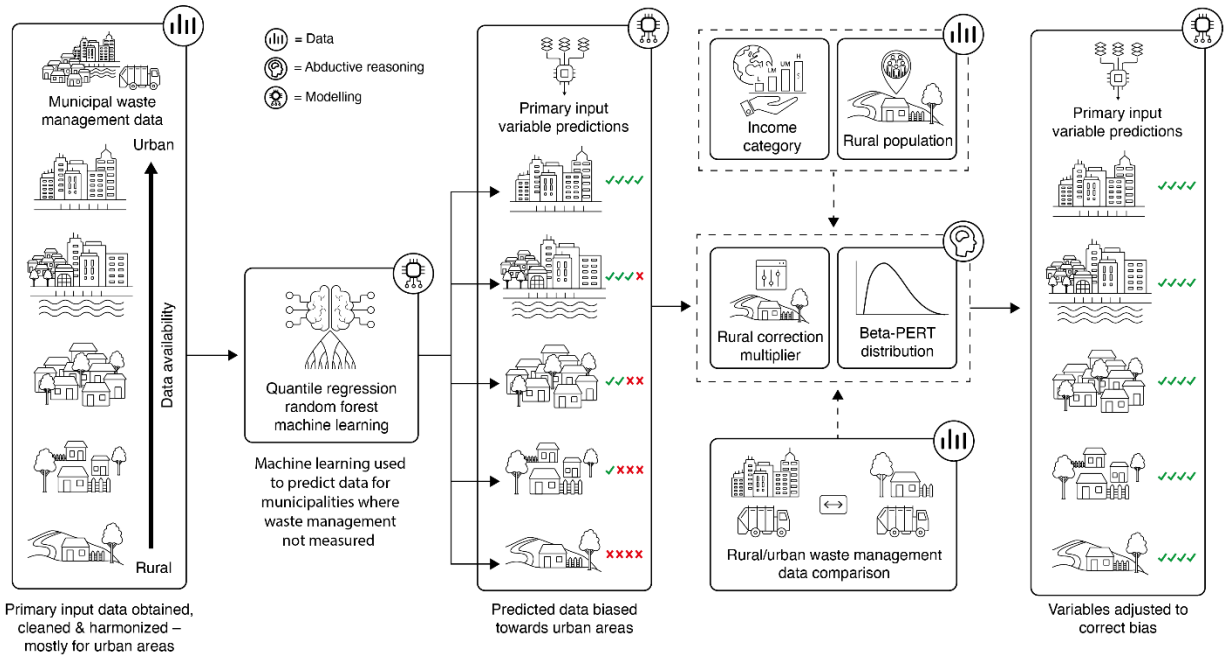

**Fig. S26.** Sub-model used to correct prediction bias in rural municipalities using correction multipliers based on income category and settlement typology.

We applied **Equation S5** to each *primary input variable* as listed in **Table S37**. Similar corrections have been made in other works<sup>5,181</sup>.

$$V_r = V_u \times \left( 1 - \left( \frac{Pop_{r,\%}}{100} \right) \times (1 - CF_r) \right) \quad \text{Equation S5}$$

Where:

•  $V_r$  is the *primary input variable predictions* after correction for settlement typology



- $V_u$  is the *primary input variable predictions* prior to correction for settlement typology (**Section S.9.1.1**)
- $Pop_r, \%$  is the rural population as a percentage of the municipality's population (**Section S.7.1**)
- $CF_r$  is the rural correction multiplier as randomly sampled from the distributions and parameters outlined in **Table S37**.

**Table S37.** Correction multipliers were used to adjust randomly sampled predictions for selected variables in rural administrative areas. Parameters 1,2 and 3 for Beta-PERT distributions are the minimum, most likely, and maximum respectively, with a default shape factor of 4 used in all cases. For normal distributions, Parameters 1 and 2 are the mean and standard deviation respectively.

| ID                | Variable name                               | Income category | PDF       | Parameter 1 | Parameter 2 | Parameter 3 |
|-------------------|---------------------------------------------|-----------------|-----------|-------------|-------------|-------------|
| tP1 <sub>pc</sub> | MSW generation rate                         | HIC             | Beta-PERT | 0.95        | 1.08        | 1.15        |
|                   |                                             | UMC             | Normal    | 0.62        | 0.21        | -           |
|                   |                                             | LMC             | Normal    | 0.47        | 0.25        | -           |
|                   |                                             | LIC             | Normal    | 0.47        | 0.25        | -           |
| C0                | Plastic in MSW                              | HIC             | Beta-PERT | 0.9         | 1.00        | 1.00        |
|                   |                                             | UMC             | Normal    | 0.73        | 0.36        | 1.00        |
|                   |                                             | LMC             | Normal    | 0.69        | 0.38        | -           |
|                   |                                             | LIC             | Normal    | 0.69        | 0.38        | -           |
| tC1               | Collection coverage                         | HIC             | Beta-PERT | 1.00        | 1.00        | 1.00        |
|                   |                                             | UMC             | Beta-PERT | 0.43        | 0.53        | 0.63        |
|                   |                                             | LMC             | Beta-PERT | 0.36        | 0.46        | 0.56        |
|                   |                                             | LIC             | Beta-PERT | 0.44        | 0.54        | 0.64        |
| tC2i              | Formal collection of MSW for dry recycling  | HIC             | Beta-PERT | 0.90        | 1.00        | 1.00        |
|                   |                                             | UMC             | Beta-PERT | 0.40        | 0.50        | 0.60        |
|                   |                                             | LMC             | Beta-PERT | 0.00        | 0.00        | 0.00        |
|                   |                                             | LIC             | Beta-PERT | 0.00        | 0.00        | 0.00        |
| tC2ii             | Formal collection of MSW for other recovery | HIC             | Beta-PERT | 0.90        | 1.00        | 1.00        |
|                   |                                             | UMC             | Beta-PERT | 0.40        | 0.50        | 0.60        |
|                   |                                             | LMC             | Beta-PERT | 0.00        | 0.00        | 0.00        |
|                   |                                             | LIC             | Beta-PERT | 0.00        | 0.00        | 0.00        |
| tC2iii            | Formal collection of MSW for incineration   | HIC             | Beta-PERT | 0.90        | 1.00        | 1.00        |
|                   |                                             | UMC             | Beta-PERT | 0.00        | 0.00        | 0.00        |
|                   |                                             | LMC             | Beta-PERT | 0.00        | 0.00        | 0.00        |
|                   |                                             | LIC             | Beta-PERT | 0.00        | 0.00        | 0.00        |
| tC3               | Controlled disposal of MSW                  | HIC             | Beta-PERT | 1.00        | 1.00        | 1.00        |
|                   |                                             | UMC             | Beta-PERT | 0.90        | 1.00        | 1.00        |
|                   |                                             | LMC             | Beta-PERT | 0.00        | 0.00        | 0.00        |
|                   |                                             | LIC             | Beta-PERT | 0.00        | 0.00        | 0.00        |

Abbreviations: Low-income country (LIC); high income country (HIC); lower middle-income country (LMC); upper middle-income country (UMC); municipal solid waste (MSW).

The correction in **Equation S5** scales the *primary input variable predictions* according to the percentage of the population in each municipality that is classed as rural (**Section S.7.1**) and a *primary input variable* specific correction multiplier (with uncertainty accounted for by representing this as a PDF and randomly sampling from it). The parameters of the rural

correction multiplier PDFs for each *primary input variable* are shown in **Table S37** and justified in **Sections S.9.1.2.1-S.9.1.2.6**.

#### ***S.9.1.2.1 MSW generation rate ( $tPI_{pc}$ )***

MSW generation rates ( $tPI_{pc}$ ) are thought to vary according to rurality (degree of urbanisation), however the data to evidence this is limited. It is widely assumed that in the Global South, waste generation in rural areas is less, for example both Hoornweg and Bhada-Tata<sup>359</sup> and Kaza, et al.<sup>30</sup> assumed it is approximately 50% less than in urban areas whilst acknowledging that the data to support such an assumption are sparse. This is also supported by much of the data reported in Karak, et al.<sup>360</sup>, although considerable variation around this value was demonstrated depending on the case study. On the other hand, Lau, et al.<sup>5</sup> assumed no difference between waste generation in rural and urban areas of HICs and Hidalgo, et al.<sup>361</sup> found only non-significant differences in Spain.

#### **High income countries**

For HICs, we classified UK local Unitary and Collection Authorities by Level 1 settlement typology using the GHS-DUC<sup>194</sup> results for GADM V4.1<sup>362</sup>, ignoring any blanks due to differences between the local authority and GADM boundaries. We summed local authority collected waste reported by Defra<sup>363</sup> and divided it by the GHS population for 2020<sup>194</sup> to express on a per capita basis.

Rural areas generated approximately 7.6% (central estimate) more waste compared with urban areas. Analysis of the same dataset<sup>363</sup> shows that this difference is largely due to higher rates of ‘green’ waste (garden/ yard waste) which were 57% higher in rural areas compared to urban areas, accounting for 24% and 18% of household waste generation respectively. We assumed a Beta Pert distribution with a shape factor of 4, an upper limit that was double the central estimate (15%) and rounded the central estimate to 8% (**Table S37**). For the lower limit, we assumed a slightly lower waste generation rate on the basis that the UK is unlikely to be typical for all HICs and that many of them will have lower rural waste generation rates.

#### **Low- and middle-income countries**

Robust and granular waste generation data such as that analysed for the UK was not available for countries in the Global South. Therefore, we collected 40 data points (13 from UMCs, 26 from LMCs, and 1 from LICs) from 13 studies<sup>364-376</sup> of 11 countries, where rural waste generation was reported. For 11 of the data points, urban waste generation was calculated so we were able to calculate a ratio directly. For the remaining 29 data points, we calculated the ratio between rural waste generation and the mean urban waste generation for that country from our own cleaned *primary input data*. We grouped countries by income category and calculated the mean and standard deviation for each, assuming a normal distribution for the model input (**Table S37**). As there was only one data point for LICs, we merged LIC and LMC categories.

#### ***S.9.1.2.2 Plastic in MSW ( $C_0$ )***

Little data exist to evidence a difference in plastic composition between rural and urban areas in HICS. Lebreton and Andrady<sup>181</sup> also found no statistically significant relationship between per capita GDP and the proportion of plastic in MSW. It is unclear if this lack of relationship with

GDP also applies sub-nationally; however, we argue that the amount of plastic in MSW may be lower in rural areas compared to those in cities because of higher proportions of Green (garden yard) (**Section S.9.1.2.1**).

For HICs, we assumed plastic compositions the same as those for urban areas, as the central and maximum estimates (highly unlikely they produce more plastic as % in rural than urban). We chose the lower bound of the BETA-PERT distribution to be 0.9, as HIC may produce more garden waste (**Table S37**). For LMICs, we carried out the same analysis as described in **Section S.9.1.2.1**, using a sub-set of nine of the same articles<sup>364-368,371-373,376</sup> (which reported plastic waste composition).

#### ***S.9.1.2.3 Collection coverage (tC1)***

Kaza, et al.<sup>30</sup> reported that urban areas have higher collection coverage than rural areas, with this also depending on the income level of the country. HICs for instance had rural collection coverages almost comparable to urban levels (98% of urban collection rate). This proportion decreases for UMCs to 53% of urban collection rates, 46% in LMCs and 54% in LICs (equivalent to 26% rural collection coverage in LICs). These factors were used as the central estimates for the collection coverage rural correction factors with  $\pm 10\%$  assigned as the uncertainty in all income groups except HIC. For HICs, no correction was made to the predicted values to account for settlement typology as applying the 0.98 factor from Kaza, et al.<sup>30</sup> would likely lead to an unrealistic overestimation of uncollected waste in HICs.

#### ***S.9.1.2.4 Formal collection of MSW for dry recycling (tC2i) and other recovery (tC2ii)***

Both formal collection of MSW for dry recycling (tC2i) and formal collection of MSW for other recovery (tC2ii) were assigned the same rural correction factors. This assumed that HICs have the resources and regulatory imperative to extend recycling and recovery operations to rural areas (albeit with a lower uncertainty value assigned of 0.9). Conversely, LIC and LMC countries are highly unlikely to have the resources to implement formal recycling or recovery operations in rural areas, as poor road networks and high transportation costs create barriers to doing so<sup>358</sup>. As such, a correction factor of zero was applied to these LICs and LMCs, thereby assuming that fully rural municipalities (rural population percentage equal to 100%) have no formal recycling or other recovery. For UMCs we assumed more variation as there is evidence that formal recycling and recovery begins to be implemented along with growing resources (**Table S8, Table S13, Table S15**), and it is therefore plausible that these activities take place in some UMC rural municipalities (particularly if close to an urban centre). Therefore, a correction multiplier of 0.5 with  $\pm 0.1$  uncertainty was assigned to sit in-between those of HICs and LICs.

#### ***S.9.1.2.5 Formal collection of MSW for incineration (tC2iii)***

Incineration in HICs was treated the same as for formal dry recycling and other recovery; however, all other income categories were assigned a rural correction factor of zero. Further correction to the incineration data is discussed in **Section S.9.1.2.7**.

#### ***S.9.1.2.6 Controlled disposal of MSW (tC3)***

No rural correction was applied to controlled disposal in HICs due to regulations often enforcing controlled disposal regardless of their settlement typology, for example Directive 1999/31/EC<sup>377</sup>.

2122 A similar assumption was also applied to UMC (albeit with a lower uncertainty value of 0.9),  
2123 whereas both LMC and LIC had a value of zero assumed for the rural correction factor. Notably,  
2124 a rural correction factor of one does not mean all predictions of controlled disposal are classed as  
2125 controlled, but instead that the original prediction for the municipality is not altered based on its  
2126 settlement typology. Accordingly, municipalities in both HICs and UMCs can still be predicted  
2127 to have uncontrolled disposal.

#### 2128 ***S.9.1.2.7 Replacement of primary input predictions for formal collection of MSW for*** 2129 ***incineration (tC2iii)***

2130 Both the training and test datasets were generally effective at distinguishing between  
2131 municipalities which incinerate waste compared to those that do not. However, in a few cases,  
2132 the *primary input predictions* suggested that a municipality does not incinerate its waste when in  
2133 fact it does and vice versa.

2134 To correct these anomalies, we used data from OECD<sup>378</sup>, Eurostat<sup>379</sup>, Ding, et al.<sup>380</sup>, and Lu, et  
2135 al.<sup>381</sup> to assess which countries report more than 1% of their municipal solid waste being  
2136 incinerated between 2017 and 2020. These were: Austria, Belgium, Canada, China, Croatia,  
2137 Cyprus, Czech Republic, Denmark, Estonia, Finland, France, Germany, Greece, Hungary,  
2138 Iceland, Ireland, Israel, Italy, Japan, Latvia, Lithuania, Luxembourg, Netherlands, Norway,  
2139 Poland, Portugal, Romania, Singapore, Slovak Republic, Slovenia, South Korea, Spain, Sweden,  
2140 Switzerland, Taiwan, United Kingdom, and United States. We removed predictions for countries  
2141 reporting less than 1%, assuming that their incinerators were being used to treat hazardous or  
2142 healthcare waste, neither of which are relevant to the model.

2143 Although there are some incinerators in cities that are not within the countries above, for  
2144 example, Kyiv in Ukraine has an incineration plant that handles around a quarter of Kyiv's solid  
2145 waste<sup>382</sup>, these countries were purposely not included in the above list. This was to avoid  
2146 potentially accepting predictions of incineration throughout the whole country when incineration  
2147 is not widespread. This omission of countries with small amounts of incineration is mitigated  
2148 somewhat as the replacement of predictions with *primary input data* (**Section S.9.1.3**) takes  
2149 priority over the above correction, therefore, cities such as Kyiv that are included in the *primary*  
2150 *input data* will still have incineration represented.

2151 In the case of China, incineration as a percentage of collected waste was taken directly from the  
2152 MoHURD dataset<sup>33</sup> and replaced any predictions, as discussed in **Section S.6.4.6.2**.

#### 2153 **S.9.1.3 Sampling of secondary data inputs**

2154 *Secondary data inputs* were sampled according to the probability density functions and  
2155 parameters as described throughout **Section S.7**, each of which was randomly sampled 5,000  
2156 times. A summary of all *secondary data inputs* is shown in **Table S3**.

### 2157 **S.9.2 Material flow analysis**

2158 Material flow analysis was carried out for the system maps as shown in **Fig. S4 - Fig. S8**  
2159 according to the equations described in **Supplementary Table 2** and across all 50,702 global  
2160 municipalities. The probabilistic Monte Carlo analysis approach meant that each of these

municipal MFA results had 5,000 iterations to assess the uncertainty. As such, a large amount of raw output data was generated. Ideally, the full set of raw data outputs would have been retained to assess the probability density functions of all outputs, however, this was too computationally demanding. Instead, the raw results for each iteration were retained for only select municipalities, as specified in *Model Inputs*<sup>383</sup>. These are used to demonstrate the variability and shape of distributions of per capita plastic emissions as shown in **Figure 3**. For easier interpretation and comparability, all results were summarised by their minimum, lower quartile, median, mean, upper quartile and maximum values, as displayed in the result tables of **Supplementary Table 3, 4** and *Model Inputs*<sup>383</sup>.

In total, for each of the 50,702 municipalities, 81 processes and 42 transfer coefficients were quantified. An additional 59 outputs were also calculated from these results, such as total emissions into the environment, or the number of people without waste collection services. Outputs relate to values calculated from the processes or coefficients, for instance, the summation of all emission source processes to give the overall emissions or the division of an emission source by the overall emissions to represent it as a percentage. To represent the uncertainty of outputs (e.g., by quantiles), these calculations had to be performed on the raw results of 5,000 iteration as opposed to on the summarised results. As such, we caution the reader against calculating their own outputs based solely on the summarised data. If further outputs are required, all data and code required to run the model is available to download from DBPR<sup>383</sup>.

### **S.9.2.1 Spatial aggregation**

A unique aspect of the methodological approach described here was the bottom-up approach whereby results could be aggregated to different spatial extents (e.g., national or regional level) or groupings (e.g., by country income category).

To ensure the implementation of the probabilistic material flow analysis was computationally feasible, the Monte Carlo analysis iterated across the municipalities, with the results summarised and raw data removed after each iteration. A consequence of this would have meant that only mean values could have been aggregated, whilst information on the quantiles would have been lost. To avoid this, the probabilistic MFA was run a second time, but following a different approach. Firstly, a single iteration of the MFA was calculated for each municipality with all raw outputs retained. The processes were then summed up by the relevant groupings, before then only retaining the result at this aggregated level. This process was then repeated  $n$  times, where  $n$  is the number of overall iterations, before finally summarising the aggregated results by their minimum, lower quartile, median, mean, upper quartile and maximum values. A comparison of the two approaches is shown in **Fig. S27**.

Both approaches are a variation of the same method and should have converging results as  $n \rightarrow \infty$ . This was found to be the case with the mean global plastic emissions varying by less than 0.01% with 5,000 iterations. The groupings over which results were aggregated in this work include country level (national), UN regions (including sub-regions and intermediate regions)<sup>192</sup>, OECD regions<sup>384</sup>, income categories<sup>85</sup> and globally - **Supplementary Table 3, 4** and DBPR<sup>383</sup>.

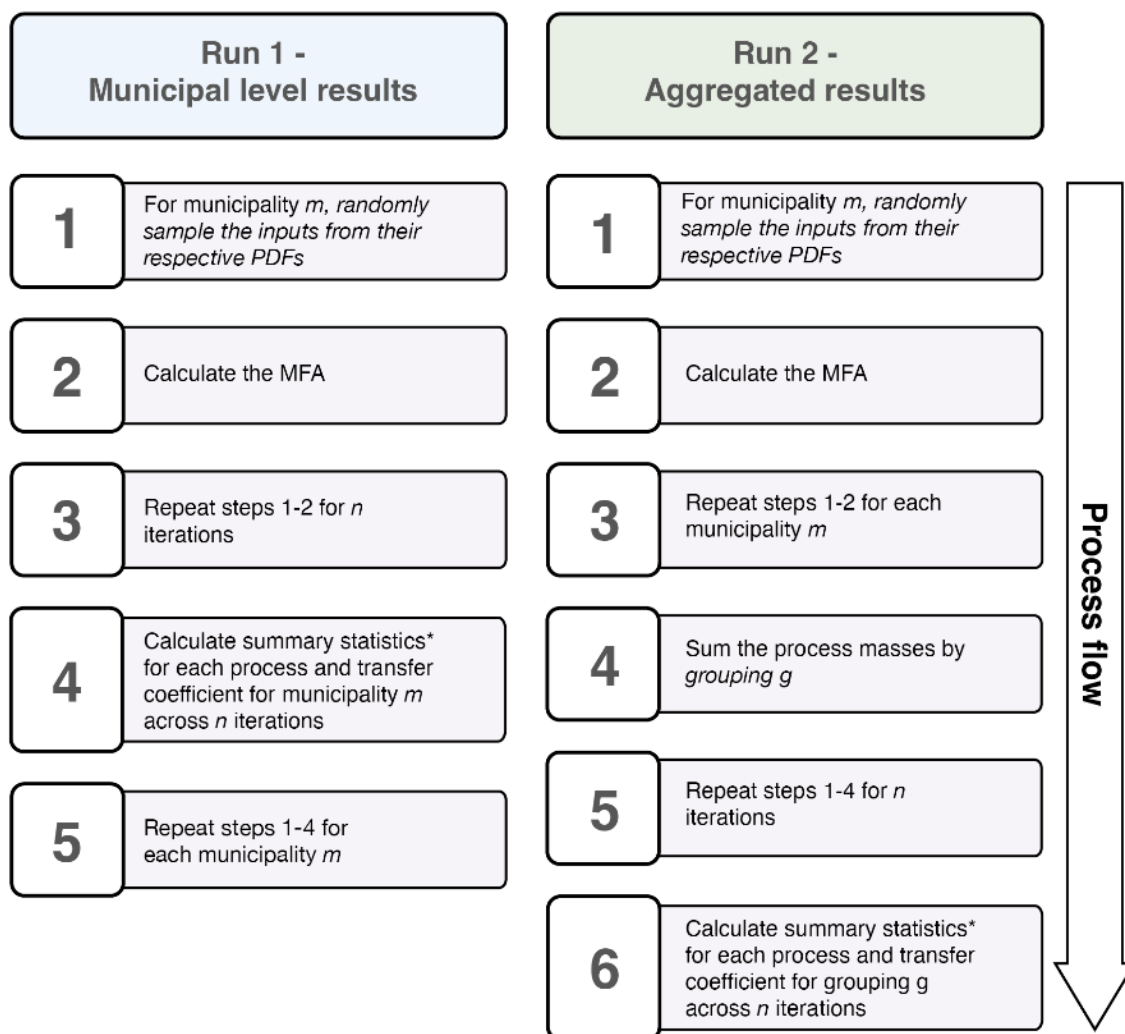

**Fig. S27.** Comparison of methods used for calculating probabilistic MFA results with uncertainty at municipal and aggregated levels. \*Summary statistics are the mean, median, 5<sup>th</sup> and 95<sup>th</sup> quantile

## S.10 Sensitivity analysis

In the absence of measured data of emissions into the environment to use as model validation, we carried out sensitivity analysis<sup>385</sup> to assess the most influential parameters of the model, in a similar manner to Lau, et al.<sup>5</sup>.

The Sobol method for sensitivity analysis is a global sensitivity variance-based method suitable for non-linear models<sup>386</sup>. We applied the *sobolmartinez* function within the R-package *sensitivity* version 1.28.1 for Monte Carlo estimation of Sobol' indices using 10,000 iterations. Both first-order (main effect) and total effect indices were estimated. Main effect indices relate to the influence one input parameter has on the output, whereas the total effect indices relate to the impact an input parameter has on the output, including all higher-order interactions.

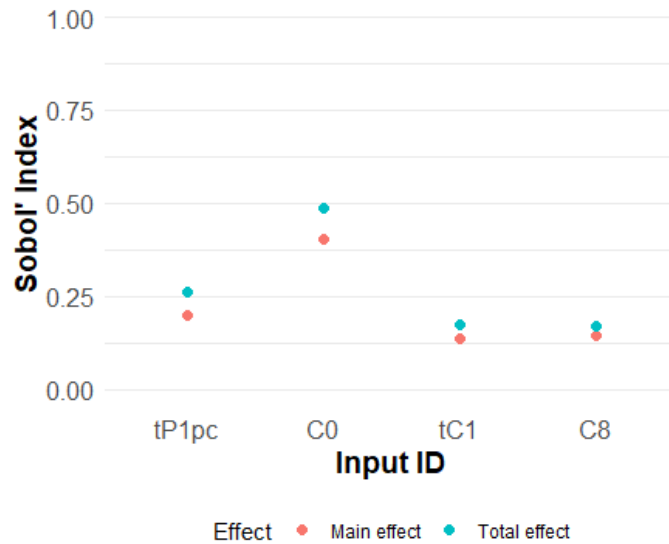

2215

2216 **Fig. S28:** Main effect and total effect Sobol' indices for total plastic emissions aggregated to the  
 2217 global scale. Abbreviations: tP1pc = Waste generation rate per capita ( $\text{kg}\cdot\text{cap}^{-1}\cdot\text{d}^{-1}$ ), C0 = plastic  
 2218 in MSW (% of generated MSW), tC1 = MSW collection coverage (% of generated MSW), C8 =  
 2219 open burning of uncontrolled disposal (% of uncontrolled disposal).

2220 Sobol indices were estimated individually for each of the 50,702 municipalities and all uncertain  
 2221 inputs. To summarise each of these sensitivity analysis results, we aggregated the first and total  
 2222 order indices across all municipalities by calculating the mean value, weighted by the total  
 2223 emissions of the municipality (**Fig. S28**). Inputs with a total effect  $<0.01$  are removed for  
 2224 simplicity given these have negligible influence of plastic emissions.

2225 Four input parameters had an influence on the amount of plastic emission (**Fig. S28**), which  
 2226 were, in order of importance from high to low: (1) Proportion of MSW that is plastic (C0); (2)  
 2227 Waste generation rate per capita (tP1pc); (3) Collection coverage (tC1); and (4) Open burning of  
 2228 uncontrolled disposal (C8). Three of these (C0, tP1pc, and tC1) were derived from our cleaned  
 2229 *primary input data* and relate to parameters that can be physically measured and therefore  
 2230 validated.

2231 It is self-evident that inputs which affect the overall mass of plastic in the system, such as the  
 2232 proportion of MSW that is plastic (C0) and waste generation rate (tP1pc), will influence plastic  
 2233 emissions. In agreement with other models<sup>5</sup>, we also found collection coverage (tC1) to be highly  
 2234 influential. This is partly because collection coverage takes place very early in the system and  
 2235 because the scattered and highly distributed nature of uncollected waste (the complement of  
 2236 collection coverage) means its entire mass becomes an emission.

2237 Although the open burning of uncontrolled disposal (C8) coefficient is implemented lower down  
 2238 in the MFA compared to the other three influential data inputs (C0, tP1pc, and tC1), it is still  
 2239 highly influential because of the large mass of material which flows through that part of the  
 2240 model. Land disposal is still the predominant system endpoint for solid waste worldwide<sup>30</sup> and  
 2241 therefore it is unsurprising that our model is sensitive to it. We postulate that controlled disposal  
 2242 (C5) itself is also a highly influential parameter. However, due to the classification problem

highlighted in **Section S.9.1.1** and subsequent corrections, no uncertainty was applied to controlled disposal (C5) meaning we could not calculate a Sobol index for it.

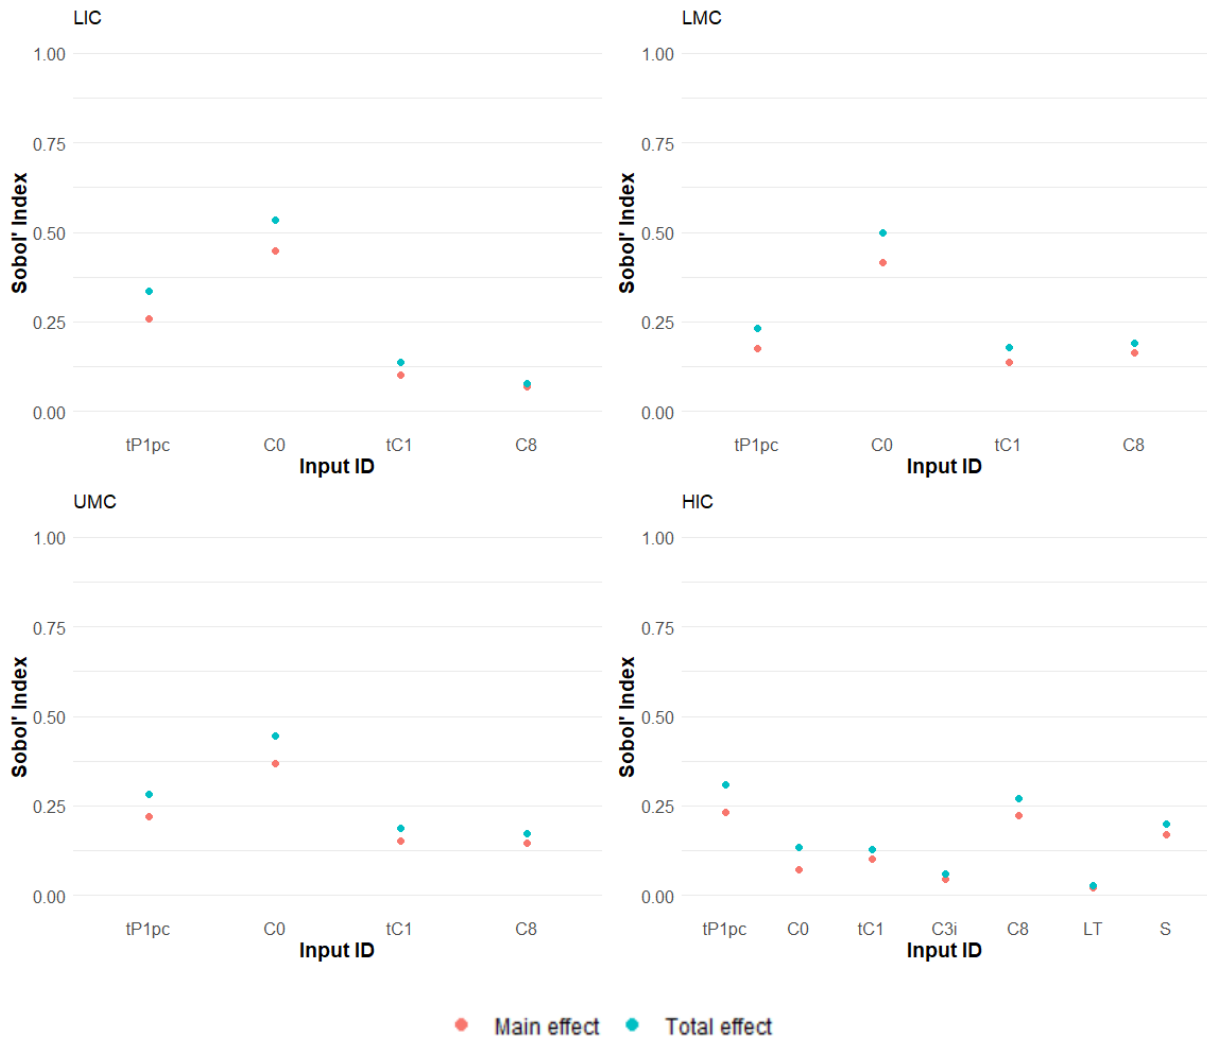

**Fig. S29:** Main effect and total effect Sobol' indices > 0.01 for total plastic emissions aggregated according to the income-categories. Abbreviations: tP1pc = Waste generation rate per capita ( $\text{kg} \cdot \text{cap}^{-1} \cdot \text{d}^{-1}$ ) C0 = plastic in MSW (% of generated MSW), tC1 = MSW collection coverage (% of generated MSW), C8 = open burning of uncontrolled disposal (% of uncontrolled disposal), C3i = emissions from the collection system prior to street sweepings (% of collected waste), LT = littering rate (% of MSW generation), S = street sweeping efficiency (%).

We also aggregated municipal level Sobol indices on an income-category basis to assess the influence of wealth on our model's sensitivity (Fig. S29). The results for LIC, LMC and UMC broadly matched those of the global analysis (Fig. S28) with the same four influential parameters (tP1pc, C0, tC1, C8). The results for HIC showed that three additional parameters were also influential on plastic emissions, the four previously listed, plus the emissions from the collection system prior to street sweepings (C3i); the littering rate (LT); and the street sweeping efficiency



2258 (S). The influence of these inputs highlights the stark differences between the causes of plastic  
2259 pollution in HICs compared to the Global South, the former of which is related to comparatively  
2260 small emissions from littering and escape from the collection system, and the latter of which is  
2261 predominantly a result of uncollected waste. We acknowledge that measured data to support  
2262 these additional sensitive inputs for HICs (C3i, LT, S) is lacking, and therefore recommend  
2263 increased efforts to focus on improving the quality of data to enable more accurate modelling of  
2264 the HIC context. However, on a global scale, these inputs were not influential and therefore the  
2265 uncertainty around their values does not affect the overall plastic pollution emission estimates or  
2266 conclusions.

## 2267 **S.11 Conversion of emission mass to item count**

2268 Assuming an average plastic item mass of 5-10 g, 52.5 Mt·y<sup>-1</sup> is equivalent to 5.2-10.5 trillion plastic items  
2269 released as debris or through open burning every year. Based on a global population of 7.8 billion people,  
2270 the same mass would be approximately 2-4 plastic items emitted per person per day (note: a large proportion  
2271 of emissions take place after collection, for example, by open burning at dumpsites).

## 2272 **References**

- 2273 1 GADM. GADM database of global administrative areas. <https://gadm.org/> (2012).
- 2274 2 Jambeck, J. R. *et al.* Plastic waste inputs from land into the ocean. *Science* **347**, 768  
2275 (2015).
- 2276 3 Lebreton, L. C. M. *et al.* River plastic emissions to the world's oceans. *Nat. Comm.* **8**,  
2277 15611 (2017).
- 2278 4 Schmidt, C., Krauth, T. & Wagner, S. Export of plastic debris by rivers into the sea.  
2279 *Environ. Sci. Technol.* **51**, 12246-12253 (2017).
- 2280 5 Lau, W. W. Y. *et al.* Evaluating scenarios toward zero plastic pollution. *Science* **369**,  
2281 1455-1461 (2020).
- 2282 6 UN-Habitat. Waste wise cities tool: Step by step guide to assess a city's municipal solid  
2283 waste management performance through SDG indicator 11.6.1 monitoring.  
2284 <https://unhabitat.org/wwc-tool> (2021).
- 2285 7 Velis, C. A. Global recycling markets: plastic waste: A story for one player – China.  
2286 <http://wedocs.unep.org/handle/20.500.11822/19316> (International Solid Waste  
2287 Association, Vienna, Austria, 2014).
- 2288 8 Cook, E. & Velis, C. Plastic waste exports and recycling: Myths, misunderstandings and  
2289 inconvenient truths. *Waste Manage. Res.* **40**, 1459-1461 (2022).
- 2290 9 Wen, Z., Xie, Y., Chen, M. & Dinga, C. D. China's plastic import ban increases  
2291 prospects of environmental impact mitigation of plastic waste trade flow worldwide. *Nat.*  
2292 *Comm.* **12**, 425 (2021).
- 2293 10 Secretariat of the Basel Convention. BC-14/12: Amendments to Annexes II, VIII and IX  
2294 to the Basel Convention. [http://www.basel.int/Portals/4/download.aspx?d=UNEP-CHW-](http://www.basel.int/Portals/4/download.aspx?d=UNEP-CHW-COP.14-BC-14-12.English.pdf)  
2295 [COP.14-BC-14-12.English.pdf](http://www.basel.int/Portals/4/download.aspx?d=UNEP-CHW-COP.14-BC-14-12.English.pdf) (Châtelaine, Switzerland, 2021).
- 2296 11 European Commission. Commission Delegated Regulation (EU) 2020/2174 of 19  
2297 October 2020 amending Annexes IC, III, IIIA, IV, V, VII and VIII to Regulation (EC)  
2298 No 1013/2006 of the European Parliament and of the Council on shipments of waste  
2299 (Text with EEA relevance). [http://data.europa.eu/eli/reg\\_del/2020/2174/oj](http://data.europa.eu/eli/reg_del/2020/2174/oj) (Official  
2300 Journal of the European Union, 2020).
- 2301 12 United Nations. UN Comtrade Database: 3915-Waste, parings and scrap, of plastics  
2302 2022. <https://comtradeplus.un.org/> (2023).
- 2303 13 Iliff, C. Plastic waste and the Basel Convention: Investigation into the impact of the  
2304 January 2021 amendments to annexes II, VIII and IX. University of Leeds (2023).
- 2305 14 Verschoor, A. Towards a definition of microplastics: Considerations for the specification  
2306 of physico-chemical properties. Report No. RIVM Letter report 2015-0116,  
2307 <https://www.rivm.nl/bibliotheek/rapporten/2015-0116.pdf> (National Institute for Public  
2308 Health and the Environment, Bilthoven, The Netherlands, 2015).
- 2309 15 Velis, C. A., Cook, E. & Cook, J. Waste management needs a data revolution – Is plastic  
2310 pollution an opportunity? *Waste Manage. Res.* **39**, 1113-1115 (2021).

2311 16 Wilson, D. C. *et al.* Global waste management outlook. Report No. 9280734792,  
2312 <https://wedocs.unep.org/bitstream/handle/20.500.11822/9672/->  
2313 Global\_Waste\_Management\_Outlook-  
2314 2015Global\_Waste\_Management\_Outlook.pdf.pdf?sequence=3&isAllowed=  
2315 (United Nations Environment Programme, Nairobi, Kenya, 2015).

2316 17 Velis, C. Waste pickers in Global South: Informal recycling sector in a circular economy  
2317 era. *Waste Manage. Res.* **35**, 329-331 (2017).

2318 18 Adedara, M. L., Taiwo, R. & Bork, H.-R. Municipal solid waste collection and coverage  
2319 rates in sub-Saharan african countries: A comprehensive systematic review and meta-  
2320 analysis. *Waste* **1**, 389-413 (2023).

2321 19 Wasserman, M., Anshassi, M. & Townsend Timothy, G. Assessing sample number  
2322 requirements for municipal solid waste composition studies. *J. Hazard. Toxic Radioact.*  
2323 *Waste* **26**, 04021038 (2022).

2324 20 Chaudhary, P. *et al.* Underreporting and open burning – the two largest challenges for  
2325 sustainable waste management in India. *Resour. Conserv. Recycl.* **175**, 105865 (2021).

2326 21 Chen, D. M. C., Bodirsky, B. L., Krueger, T., Mishra, A. & Popp, A. The world's  
2327 growing municipal solid waste: trends and impacts. *Environ. Res. Lett.* **15**, 074021  
2328 (2020).

2329 22 Sharma, G. *et al.* Gridded Emissions of CO, NO<sub>x</sub>, SO<sub>2</sub>, CO<sub>2</sub>, NH<sub>3</sub>, HCl, CH<sub>4</sub>, PM<sub>2.5</sub>,  
2330 PM<sub>10</sub>, BC, and NMVOC from Open Municipal Waste Burning in India. *Environ. Sci.*  
2331 *Technol.* **53**, 4765-4774 (2019).

2332 23 Kawai, K. & Tasaki, T. Revisiting estimates of municipal solid waste generation per  
2333 capita and their reliability. *J. Mater. Cycles Waste Manage.* **18**, 1-13 (2016).

2334 24 Brunner, P. H. & Rechberger, H. *Practical Handbook of Material Flow Analysis: For*  
2335 *Environmental, Resource and Waste Engineers*. Second edn, (CRC Press, Boca Raton,  
2336 USA, 2017).

2337 25 Cook, E. & Velis, C. Global review on safer end of engineered life. 2021).

2338 26 Linzner, R. & Lange, U. Role and size of informal sector in waste management – a  
2339 review. *Proceedings of the Institution of Civil Engineers - Waste and Resource*  
2340 *Management* **166**, 69-83 (2013).

2341 27 Charles, D. & Kimman, L. Plastic waste makers index 2023.  
2342 [https://cdn.minderoo.org/content/uploads/2023/02/04205527/Plastic-Waste-Makers-](https://cdn.minderoo.org/content/uploads/2023/02/04205527/Plastic-Waste-Makers-Index-2023.pdf)  
2343 [Index-2023.pdf](https://cdn.minderoo.org/content/uploads/2023/02/04205527/Plastic-Waste-Makers-Index-2023.pdf) (2023).

2344 28 Schiavina, M., Freire, S. & MacManus, K., GHS population grid multitemporal (1975,  
2345 1990, 2000, 2015) R2019A. European Commission Joint Research Centre (JRC)  
2346 <http://doi.org/10.2905/42E8BE89-54FF-464E-BE7B-BF9E64DA5218> (2019).

2347 29 UN-Habitat. Wastewise cities (WaCT) data portal. <https://unh.rwm.global/> (2022).

2348 30 Kaza, S., Yao, L., Bhada-Tata, P. & Van Woerden, F. What a waste 2.0: a global  
2349 snapshot of solid waste management to 2050.

- 2350 <https://openknowledge.worldbank.org/bitstream/handle/10986/30317/9781464813290.pdf?sequence=12&isAllowed=y> (World Bank Publications, Washington, DC, 2018).
- 2351
- 2352 31 Wasteaware. Wasteaware benchmark indicators. <http://wabi.wasteaware.org/> (2022).
- 2353 32 United Nations Statistics Division (UNSD). UNSD environmental indicators - waste.
- 2354 <https://unstats.un.org/unsd/envstats/qindicators> (New York, 2020).
- 2355 33 Ministry of Housing and Urban-Rural Development (MoHURD), 2019 urban
- 2356 construction statistical yearbook.
- 2357 <http://www.mohurd.gov.cn/xytj/tjzljxxytjgb/jstjnj/w02020123122485271423125000.xls>
- 2358 (2019).
- 2359 34 SIPSN, National waste management information system (Sistem informasi pengelolaan
- 2360 sampah nasional). <https://sipsn.menlhk.go.id/sipsn/public/home> (2022).
- 2361 35 Dlamini, W. M. *et al.* National inventory on open burning practices and unintentional
- 2362 persistent organic pollutants (UPOPS) releases.
- 2363 [https://stopopenburning.unitar.org/site/assets/files/1089/eswatini-](https://stopopenburning.unitar.org/site/assets/files/1089/eswatini-_inventory_report_for_open_burning_project-_oct2017.pdf)
- 2364 [\\_inventory\\_report\\_for\\_open\\_burning\\_project-\\_oct2017.pdf](https://stopopenburning.unitar.org/site/assets/files/1089/eswatini-_inventory_report_for_open_burning_project-_oct2017.pdf) (Mbabane, Swaziland, 2017).
- 2365 36 Wills, P. Composition analysis of litter waste in Wales.
- 2366 [https://gov.wales/sites/default/files/publications/2020-01/composition-analysis-of-litter-](https://gov.wales/sites/default/files/publications/2020-01/composition-analysis-of-litter-waste-in-wales.pdf)
- 2367 [waste-in-wales.pdf](https://gov.wales/sites/default/files/publications/2020-01/composition-analysis-of-litter-waste-in-wales.pdf) (Welsh Government, Bristol, UK, 2019).
- 2368 37 Department for Environment Food and Rural Affairs (Defra). Statistics on waste
- 2369 managed by local authorities in England in 2019/20.
- 2370 [https://www.gov.uk/government/statistics/local-authority-collected-waste-management-](https://www.gov.uk/government/statistics/local-authority-collected-waste-management-annual-results)
- 2371 [annual-results](https://www.gov.uk/government/statistics/local-authority-collected-waste-management-annual-results) (UK, 2021).
- 2372 38 Wilson, D. C. *et al.* ‘Wasteaware’ benchmark indicators for integrated sustainable waste
- 2373 management in cities. *Waste Manage.* **35**, 329-342 (2015).
- 2374 39 United Nations Statistics Division (UNSD). Questionnaire 2020 on environmental
- 2375 statistics - waste. <https://unstats.un.org/unsd/envstats/questionnaire> (United Nations
- 2376 Statistics Division (UNSD), New York, 2020).
- 2377 40 Velis, C. A., Wilson, D. C., Gavish, Y., Grimes, S. M. & Whiteman, A. Socio-economic
- 2378 development drives solid waste management performance in cities: A global analysis
- 2379 using machine learning. *Sci. Total Environ.* **872**, 161913 (2023).
- 2380 41 Ciesin Columbia University & Center for International Earth Science Information
- 2381 Network, Gridded population of the world, version 4 (GPWv4): Population count
- 2382 adjusted to match 2010, 2015, 2020 revisions of UN WPP country totals, revision 11.
- 2383 <https://doi.org/10.7927/H4PN93PB> (2018).
- 2384 42 Qu, W. & Li, R. Translation of personal and place names from and into Chinese in
- 2385 modern China: A lexicographical history perspective. *International Journal for the*
- 2386 *Semiotics of Law - Revue internationale de Sémiotique juridique* **28**, 525-557 (2015).
- 2387 43 Chen, J., Kan, K. & Davis, D. S. Administrative reclassification and neighborhood
- 2388 governance in urbanizing China. *Cities.* **118**, 103386 (2021).
- 2389 44 Google. Google hybrid map. <https://www.google.com/maps> (2021).

- 2390 45 Hogg, D. *et al.* Study on Waste Statistics – A comprehensive review of gaps and  
2391 weaknesses and key priority areas for improvement in the EU waste statistics.  
2392 [https://www.eunomia.co.uk/reports-tools/study-on-waste-statistics-a-comprehensive-](https://www.eunomia.co.uk/reports-tools/study-on-waste-statistics-a-comprehensive-review-of-gaps-and-weaknesses-and-key-priority-areas-for-improvement-in-the-eu-waste-statistics/)  
2393 [review-of-gaps-and-weaknesses-and-key-priority-areas-for-improvement-in-the-eu-](https://www.eunomia.co.uk/reports-tools/study-on-waste-statistics-a-comprehensive-review-of-gaps-and-weaknesses-and-key-priority-areas-for-improvement-in-the-eu-waste-statistics/)  
2394 [waste-statistics/](https://www.eunomia.co.uk/reports-tools/study-on-waste-statistics-a-comprehensive-review-of-gaps-and-weaknesses-and-key-priority-areas-for-improvement-in-the-eu-waste-statistics/) (Eunomia Research & Consulting, ENT Environment and Management,  
2395 & Ekokonsultacijos, Bristol, UK, 2017).
- 2396 46 UN-Habitat. *Solid Waste Management in the World's Cities*. (UN-HABITAT, 2010).
- 2397 47 Wilson, D. C., Rodic, L., Scheinberg, A., Velis, C. A. & Alabaster, G. Comparative  
2398 analysis of solid waste management in 20 cities. *Waste Manage. Res.* **30**, 237-254 (2012).
- 2399 48 Azevedo, B. D., Scavarda, L. F., Caiado, R. G. G. & Fuss, M. Improving urban  
2400 household solid waste management in developing countries based on the German  
2401 experience. *Waste Manage.* **120**, 772-783 (2021).
- 2402 49 Abdulredha, M., Kot, P., Al Khaddar, R., Jordan, D. & Abdulridha, A. Investigating  
2403 municipal solid waste management system performance during the Arba'een event in the  
2404 city of Kerbala, Iraq. *Environ. Dev. Sus.* **22**, 1431-1454 (2020).
- 2405 50 Ali, M. *et al.* Improvement of waste management practices in a fast expanding sub-  
2406 megacity in Pakistan, on the basis of qualitative and quantitative indicators. *Waste*  
2407 *Manage.* **85**, 253-263 (2019).
- 2408 51 Kabera, T. & Nishimwe, H., "Systems analysis of municipal solid waste management and  
2409 recycling system in east Africa: benchmarking performance in Kigali City, Rwanda" in  
2410 2018 International Conference on Renewable Energy and Environment Engineering  
2411 (REEE 2018) (E3S Web Conf, 2019), pp. 03004.
- 2412 52 Sharma, A., Ganguly, R. & Gupta, A. K. in *Pollutants from Energy Sources:*  
2413 *Characterization and Control* (eds Rashmi Avinash Agarwal, Avinash Kumar Agarwal,  
2414 Tarun Gupta, & Nikhil Sharma) 253-268 (Springer Singapore, Singapore, 2019).
- 2415 53 Kabera, T., Wilson, D. C. & Nishimwe, H. Benchmarking performance of solid waste  
2416 management and recycling systems in East Africa: Comparing Kigali Rwanda with other  
2417 major cities. *Waste Manage. Res.* **37**, 58-72 (2019).
- 2418 54 Sharma, A., Ganguly, R. & Gupta, A. K. Matrix method for evaluation of existing solid  
2419 waste management system in Himachal Pradesh, India. *J. Mater. Cycles Waste Manage.*  
2420 **20**, 1813-1831 (2018).
- 2421 55 Sharma, A., Ganguly, R. & Gupta, A. K., "Comparative analysis of solid waste  
2422 management processes in Himachal Pradesh and Punjab" in Proceedings of the 1st  
2423 International Conference on Sustainable Waste Management through Design (Springer  
2424 International Publishing, 2019), pp. 343-352.
- 2425 56 Sharma, D. & Ganguly, R. Evaluation of existing solid waste management practices for  
2426 Solan city-India. *J. Solid Waste Technol. Manage.* **44**, 32-42 (2018).
- 2427 57 Lupo, T. & Cusumano, M. Towards more equity concerning quality of urban waste  
2428 management services in the context of cities. *J Clean Prod* **171**, 1324-1341 (2018).
- 2429 58 Abdulredha, M., al-Khaddar, R., Kot, P., Jordan, D. & Abdulridha, A., "Benchmarking of  
2430 the current solid waste management system in Karbala, Iraq, using Wastaware

2431 Benchmark Indicators" in World Environmental and Water Resources Congress 2018  
2432 (ASCE, 2018), pp. 40-48.

2433 59 Oduro-Appiah, K. *et al.* Assessment of the municipal solid waste management system in  
2434 Accra, Ghana: A 'Wasteaware' benchmark indicator approach. *Waste Manage. Res.* **35**,  
2435 1149-1158 (2017).

2436 60 Byamba, B. & Ishikawa, M. Municipal solid waste management in Ulaanbaatar,  
2437 Mongolia: Systems analysis. *Sustainability* **9**, 896 (2017).

2438 61 Rana, R., Ganguly, R. & Gupta, A. K. Evaluation of solid waste management in satellite  
2439 towns of Mohali and Panchkula-India. *J. Solid Waste Technol. Manage.* **43**, 280-294  
2440 (2017).

2441 62 Whiteman, A. *et al.* Wasteaware benchmark indicators for integrated sustainable waste  
2442 management in chinese cities. <https://rwm.global/utilities/documents/wabi.pdf> (Deutsche  
2443 Gesellschaft für Internationale Zusammenarbeit (GIZ) GmbH, Beijing, PR China,, 2019).

2444 63 New center for Integrated studies of Land & Environment (NILE), Zaki, T., Kafafi, A.  
2445 G., Mina, M. B. & Abd El-Halim, A. E. H. M. Annual report for solid waste management  
2446 in Egypt, 2013.  
2447 [http://cairoclimatetalks.net/sites/default/files/EN%20Annual%20Report%20on%20Waste](http://cairoclimatetalks.net/sites/default/files/EN%20Annual%20Report%20on%20Waste%20in%20Egypt_2013.pdf)  
2448 [%20in%20Egypt\\_2013.pdf](http://cairoclimatetalks.net/sites/default/files/EN%20Annual%20Report%20on%20Waste%20in%20Egypt_2013.pdf) (Ministry of State for Environmental Affairs, Cairo, Egypt,  
2449 2013).

2450 64 Association Jeffares & Green (Pty) Ltd & RWA Resources & Waste Advisory Group.  
2451 The diversion of municipal solid waste away from landfills in 6 South African  
2452 municipalities: Waste analysis and composition survey (report). Deutsche Gesellschaft  
2453 für Internationale Zusammenarbeit (GIZ) GmbH, 2016).

2454 65 Gutierrez Galicia, F., Coria Paez, A. L. & Tejeida Padilla, R. A study and factor  
2455 identification of municipal solid waste management in mexico city. *Sustainability* **11**,  
2456 6305 (2019).

2457 66 Zaman, A. U. Measuring waste management performance using the 'Zero Waste Index':  
2458 the case of Adelaide, Australia. *J Clean Prod* **66**, 407-419 (2014).

2459 67 Waste Management World. Recycling facility opens in Varna Bulgaria. [https://waste-](https://waste-management-world.com/artikel/recycling-facility-opens-in-varna-bulgaria/)  
2460 [management-world.com/artikel/recycling-facility-opens-in-varna-bulgaria/](https://waste-management-world.com/artikel/recycling-facility-opens-in-varna-bulgaria/) (2011).

2461 68 Al Sabbagh, M. K., Velis, C. A., Wilson, D. C. & Cheeseman, C. R. Resource  
2462 management performance in Bahrain: a systematic analysis of municipal waste  
2463 management, secondary material flows and organizational aspects. *Waste Manage. Res.*  
2464 **30**, 813-824 (2012).

2465 69 Fuss, M., Barros, R. T. V. & Poganietz, W. R. The role of a socio-integrated recycling  
2466 system in implementing a circular economy – The case of Belo Horizonte, Brazil. *Waste*  
2467 *Manage.* **121**, 215-225 (2021).

2468 70 European Green Capital. Vitoria-Gasteiz towards zero waste.  
2469 <https://ec.europa.eu/environment/europeangreencapital/vg-zero-waste/> (2013).

2470 71 StatLine, Municipal waste quantities, 1993-2015.  
2471 [https://opendata.cbs.nl/#/CBS/en/dataset/7467eng/table?searchKeywords=municipal%20](https://opendata.cbs.nl/#/CBS/en/dataset/7467eng/table?searchKeywords=municipal%20waste)  
2472 [waste](https://opendata.cbs.nl/#/CBS/en/dataset/7467eng/table?searchKeywords=municipal%20waste) (2016).

2473 72 Department of the Environment. Northern Ireland local authority collected municipal  
2474 waste management statistics: Annual report 2011/12. [https://www.daera-](https://www.daera-ni.gov.uk/sites/default/files/publications/doe/lac-municipal-waste-2011-12.pdf)  
2475 [ni.gov.uk/sites/default/files/publications/doe/lac-municipal-waste-2011-12.pdf](https://www.daera-ni.gov.uk/sites/default/files/publications/doe/lac-municipal-waste-2011-12.pdf)  
2476 (Analytical Services Branch Department of the Environment, Belfast, Northern Ireland,  
2477 2012).

2478 73 European Commission. Capital factsheet on separate collection. Report No.  
2479 070201/ENV/2014/691401/SFRA/A2,  
2480 [https://www.municipalwasteeurope.eu/sites/default/files/EL%20Athens%20Capital%20fa](https://www.municipalwasteeurope.eu/sites/default/files/EL%20Athens%20Capital%20factsheet.pdf)  
2481 [ctsheet.pdf](https://www.municipalwasteeurope.eu/sites/default/files/EL%20Athens%20Capital%20factsheet.pdf) (European Commission, 2014).

2482 74 Agarwal, A., Singhmar, A., Kulshrestha, M. & Mittal, A. K. Municipal solid waste  
2483 recycling and associated markets in Delhi, India. *Resour. Conserv. Recycl.* **44**, 73-90  
2484 (2005).

2485 75 Unifeed. St Lucia recycling.  
2486 <https://www.unmultimedia.org/tv/unifeed/asset/1153/1153089/> (2014).

2487 76 Zero Waste SG. Singapore waste statistics 2011.  
2488 <http://www.zerowastesg.com/2012/03/27/singapore-waste-statistics-2011/> (2011).

2489 77 Aprilia, A., Tezuka, T. & Spaargaren, G. in *Waste Management-An Integrated Vision*  
2490 (ed Luis Fernando Marmolejo Rebellon) 71-100 (IntechOpen, 2012).

2491 78 Sim, N. M., Wilson, D. C., Velis, C. A. & Smith, S. R. Waste management and recycling  
2492 in the former Soviet Union: The City of Bishkek, Kyrgyz Republic (Kyrgyzstan). *Waste*  
2493 *Manage. Res.* **31**, 106-125 (2013).

2494 79 Masood, M., Barlow, C. Y. & Wilson, D. C. An assessment of the current municipal solid  
2495 waste management system in Lahore, Pakistan. *Waste Manage. Res.* **32**, 834-847 (2014).

2496 80 Zaman, A. U. & Lehmann, S. The zero waste index: a performance measurement tool for  
2497 waste management systems in a 'zero waste city'. *J Clean Prod* **50**, 123-132 (2013).

2498 81 Scheinberg, A. & Simpson, M. A tale of five cities: Using recycling frameworks to  
2499 analyse inclusive recycling performance. *Waste Manage. Res.* **33**, 975-985 (2015).

2500 82 Albrepe. Panorama dos resíduos sólidos no Brasil. <https://abrelpe.org.br/panorama/>  
2501 (Albrepe, 2020).

2502 83 National Bureau of Statistics of China. Explanatory notes on main statistical indicators.  
2503 <http://www.stats.gov.cn/tjsj/ndsj/2017/indexeh.htm> (2017).

2504 84 Tukey, J. W. *Exploratory Data Analysis*. Vol. 2 (Reading, MA, 1977).

2505 85 The World Bank. World Bank country and lending groups.  
2506 [https://datahelpdesk.worldbank.org/knowledgebase/articles/906519-world-bank-country-](https://datahelpdesk.worldbank.org/knowledgebase/articles/906519-world-bank-country-and-lending-groups)  
2507 [and-lending-groups](https://datahelpdesk.worldbank.org/knowledgebase/articles/906519-world-bank-country-and-lending-groups) (2021).

2508 86 Wilson, D. C., Araba, A. O., Chinwah, K. & Cheeseman, C. R. Building recycling rates  
2509 through the informal sector. *Waste Manage.* **29**, 629-635 (2009).

2510 87 Kodra, A. & Milios, L. Municipal waste management in Albania.  
2511 [https://www.eea.europa.eu/publications/managing-municipal-solid-waste/albania-](https://www.eea.europa.eu/publications/managing-municipal-solid-waste/albania-municipal-waste-management)  
2512 [municipal-waste-management](https://www.eea.europa.eu/publications/managing-municipal-solid-waste/albania-municipal-waste-management) (European Environment Agency (EEA), 2013).

2513 88 Ruurd van Schaik, H. B. Business opportunities in waste management in Algeria.  
2514 Netherlands Enterprise Agency, Prinses Beatrixlaan, 2018).

2515 89 Pegels, A. *et al.* *How Sustainable is Recycling? Reconciling the Social, Ecological, and*  
2516 *Economic Dimensions in Argentina*. (Discussion Paper, Bonn, Germany, 2020).

2517 90 BELTA. Belarus aims to achieve 90% recycling rate of solid municipal waste by 2035.  
2518 <https://eng.belta.by/> (2020).

2519 91 Gunsilius, E. Role of the informal sector in solid waste management and enabling  
2520 conditions for its integration: Experiences from GTZ. [https://www.resource-](https://www.resource-recovery.net/sites/default/files/gunsilius_gtz_role_of_informal_sector_conditions_for_integration.pdf)  
2521 [recovery.net/sites/default/files/gunsilius\\_gtz\\_role\\_of\\_informal\\_sector\\_conditions\\_for\\_int](https://www.resource-recovery.net/sites/default/files/gunsilius_gtz_role_of_informal_sector_conditions_for_integration.pdf)  
2522 [egration.pdf](https://www.resource-recovery.net/sites/default/files/gunsilius_gtz_role_of_informal_sector_conditions_for_integration.pdf) (2012).

2523 92 Silva de Souza Lima, N. & Mancini, S. D. Integration of informal recycling sector in  
2524 Brazil and the case of Sorocaba City. *Waste Manage. Res.* **35**, 721-729 (2017).

2525 93 Bermudez, J. F., Montoya-Ruiz, A. M. & Saldarriaga, J. F. Assessment of the current  
2526 situation of informal recyclers and recycling: case study Bogotá. *Sustainability* **11**, 6342  
2527 (2019).

2528 94 Bergman, E. Municipal solid waste management in informal settlements: A multiple-case  
2529 study of challenges and possibilities in the favelas and informal sector of Rio de Janeiro  
2530 city. Report No. LUTFD2/TFEM-19/5150--SE + (1-92), [http://lup.lub.lu.se/student-](http://lup.lub.lu.se/student-papers/record/8998685)  
2531 [papers/record/8998685](http://lup.lub.lu.se/student-papers/record/8998685) (Lund University, 2019).

2532 95 Valenzuela-Levi, N. Waste political settlements in Colombia and Chile: Power,  
2533 inequality and informality in recycling. *Dev. Change.* **51**, 1098-1122 (2020).

2534 96 Larochelle, L., Turner, M. & LaGiglia, M. Evaluation of NAMA opportunities in  
2535 Colombia's solid waste sector. Center for clean air policy Colombia, Washington, DC,  
2536 2012).

2537 97 The Economist Intelligence Unit. Progress and challenges for inclusive recycling: An  
2538 assessment of 12 Latin American and Caribbean Cities. EIU, New York, 2017).

2539 98 RRS & Walmart. Pursuing zero waste in a diverse landscape. [http://recycle.com/wp-](http://recycle.com/wp-content/uploads/2018/12/walmart-pursuing-zero-waste-in-a-diverse-landscape.pdf)  
2540 [content/uploads/2018/12/walmart-pursuing-zero-waste-in-a-diverse-landscape.pdf](http://recycle.com/wp-content/uploads/2018/12/walmart-pursuing-zero-waste-in-a-diverse-landscape.pdf)  
2541 (2018).

2542 99 Holland Circular Hotspot. Waste management in the LATAM region: Business  
2543 opportunities for the Netherlands in waste/circular economy sector in eight countries of  
2544 Latin America.,  
2545 [https://www.rvo.nl/sites/default/files/2021/02/Report\\_LATAM\\_Waste\\_Management\\_feb](https://www.rvo.nl/sites/default/files/2021/02/Report_LATAM_Waste_Management_feb_2021.pdf)  
2546 [\\_2021.pdf](https://www.rvo.nl/sites/default/files/2021/02/Report_LATAM_Waste_Management_feb_2021.pdf) (Netherlands Enterprise Agency, 2021).

2547 100 Robayo Tapia, L. C. Propuesta para el manejo del reciclaje de desechos sólidos en el  
2548 Distrito Metropolitano de Quito. PUCE (2016).



- 2549 101 Mazariegos, C., Constantino, P. & Brolo, J. The power of grassroots solutions in the  
2550 waste recovery chain. <https://www.gt.undp.org/> (2021).
- 2551 102 Koushki, B., Nasrabadi, T. & Amiri, M. J. Effective factors in municipal solid waste  
2552 minimization and recovery by making use of citizens' participation: Case study of a  
2553 district in Tehran City. *Pollution* **6**, 367-375 (2020).
- 2554 103 Ferrero, V. Recycle Beirut: give recycling a chance.  
2555 [https://medium.com/@vittoriaferrero/recycle-beirut-give-recycling-a-chance-](https://medium.com/@vittoriaferrero/recycle-beirut-give-recycling-a-chance-14ee66b31d19)  
2556 [14ee66b31d19](https://medium.com/@vittoriaferrero/recycle-beirut-give-recycling-a-chance-14ee66b31d19) (2019).
- 2557 104 Farah, J. *et al.* Solid waste management in Lebanon: Lessons for decentralisation.  
2558 <https://shs.hal.science/halshs-02407660v2> (Democracy Reporting International, Beirut,  
2559 Lebanon, 2019).
- 2560 105 Republic of North Macedonia State Statistical Office. Municipal waste, 2020.  
2561 <https://www.stat.gov.mk/> (2021).
- 2562 106 Razali, F., Weng Wai, C. & Daud, D. Z. A review of Malaysia solid waste management  
2563 policies to improve recycling practice and waste separation among households. *Int. J.*  
2564 *Built. Env. Sustain.* **6**, 39-45 (2019).
- 2565 107 Bernache, G. The environmental impact of municipal waste management: the case of  
2566 Guadalajara metro area. *Resour. Conserv. Recycl.* **39**, 223-237 (2003).
- 2567 108 Fogarasi, S. *et al.* Dissolution of base metals from waste printed circuit boards. *Environ*  
2568 *Eng Manag J* **14**, 5186 (2015).
- 2569 109 Almasi, A. M. Municipal waste management in Romania.  
2570 [https://www.eea.europa.eu/publications/managing-municipal-solid-waste/romania-](https://www.eea.europa.eu/publications/managing-municipal-solid-waste/romania-municipal-waste-management)  
2571 [municipal-waste-management](https://www.eea.europa.eu/publications/managing-municipal-solid-waste/romania-municipal-waste-management) (European Environment Agency (EEA), 2013).
- 2572 110 Euronews. No time to waste? Moscow begins recycling its rubbish.  
2573 [https://www.euronews.com/2020/01/02/no-time-to-waste-moscow-begins-recycling-its-](https://www.euronews.com/2020/01/02/no-time-to-waste-moscow-begins-recycling-its-rubbish)  
2574 [rubbish](https://www.euronews.com/2020/01/02/no-time-to-waste-moscow-begins-recycling-its-rubbish) (2020).
- 2575 111 Kilpeläinen, M. Evaluating alternative ways to promote recycling and circularity in St.  
2576 Petersburg's waste management. Degree Programme in Industrial Engineering and  
2577 Management. Thesis, LUT University (2020).
- 2578 112 Owen, C. A tale of two recycling initiatives: State, society and waste management in St  
2579 Petersburg and Shanghai. [https://fpc.org.uk/a-tale-of-two-recycling-initiatives-state-](https://fpc.org.uk/a-tale-of-two-recycling-initiatives-state-society-and-waste-management-in-st-petersburg-and-shanghai/)  
2580 [society-and-waste-management-in-st-petersburg-and-shanghai/](https://fpc.org.uk/a-tale-of-two-recycling-initiatives-state-society-and-waste-management-in-st-petersburg-and-shanghai/) (2019).
- 2581 113 Government of Russian Federation, "Country report (Draft) Russian Federation" in  
2582 Eighth Regional 3R Forum in Asia and the Pacific "Achieving Clean Water, Clean Land  
2583 and Clean Air through 3R and Resource Efficiency - A 21st Century Vision for Asia-  
2584 pacific Communities" (2018).
- 2585 114 letsrecycle. Recycling solutions in Serbia. [https://www.letsrecycle.com/news/latest-](https://www.letsrecycle.com/news/latest-news/recycling-solutions-in-serbia/)  
2586 [news/recycling-solutions-in-serbia/](https://www.letsrecycle.com/news/latest-news/recycling-solutions-in-serbia/) (2016).
- 2587 115 Archer, D. & Trang, N. Closing the loop. Innovative partnerships with informal workers  
2588 to recover plastic waste, in an inclusive circular economy approach.

2589 [https://www.unescap.org/sites/default/files/Closing%20The%20Loop\\_Regional%20Policy%20Guide.pdf](https://www.unescap.org/sites/default/files/Closing%20The%20Loop_Regional%20Policy%20Guide.pdf) (United Nations Economic and Social Commission for Asia and the  
2590 Pacific (ESCAP), 2018).  
2591

2592 116 Woodruff, A. Solid waste management in the Pacific: Tonga country snapshot. Report  
2593 No. ARM146616-2, [https://www.adb.org/publications/solid-waste-management-pacific-](https://www.adb.org/publications/solid-waste-management-pacific-tonga-country-snapshot)  
2594 [tonga-country-snapshot](https://www.adb.org/publications/solid-waste-management-pacific-tonga-country-snapshot) (Asian Development Bank, 2014).

2595 117 Japan International Cooperation Agency, EX Research Institute Ltd & Kokusai Kogyo  
2596 Co. Ltd. Data collection survey on solid waste management in Turkey.  
2597 <https://openjicareport.jica.go.jp/pdf/12247094.pdf> (Republic of Turkey, 2015).

2598 118 Ramos, C., Vicentini, A. & Ortega, D. Challenges and opportunities of waste collection  
2599 in Caracas: Sucre municipality case study. *Consilience*, 115-129 (2012).

2600 119 Terzidis, K. Investigation into the current and potential future use of incineration as a  
2601 form of waste treatment. MSc in Environmental Engineering and Project Management.  
2602 Thesis, University of Leeds (2022).

2603 120 Ma, W. *et al.* Air pollutant emission inventory of waste-to-energy plants in China and  
2604 prediction by the artificial neural network approach. *Environ. Sci. Technol.* **57**, 874–883  
2605 (2022).

2606 121 Kaza, S., Yao, L., Bhada-Tata, P., and Van Woerden, F., City level codebook. World  
2607 Bank <https://datacatalog.worldbank.org/dataset/what-waste-global-database> (2018).

2608 122 Djemaci, B. La gestion des déchets municipaux en Algérie: Analyse prospective et  
2609 éléments d'efficacité. Université de Rouen (2012).

2610 123 Bilal, A. & Abdelkader, O. The problem of municipal solid waste management in  
2611 Algeria. *Journal of the New Economy* **12**, 118-131 (2021).

2612 124 Madani, S. Z. in *Sociétés urbaines et déchets: Éclairages internationaux* (eds C. Cirelli  
2613 & B. Florin) 101-120 (Presses Universitaires François-Rabelais, 2015).

2614 125 van Schaik, R. & Breukelman, H. Business opportunities in waste management in  
2615 Algeria. [https://www.rvo.nl/sites/default/files/2018/06/Business-opportunities-in-waste-](https://www.rvo.nl/sites/default/files/2018/06/Business-opportunities-in-waste-management-in-Algeria.pdf)  
2616 [management-in-Algeria.pdf](https://www.rvo.nl/sites/default/files/2018/06/Business-opportunities-in-waste-management-in-Algeria.pdf) (Ministry of Foreign Affairs, Netherlands, 2018).

2617 126 Algerie Presse Service. Recycling and waste treatment fair: opening of the 2nd edition in  
2618 Oran. [https://www.aps.dz/economie/68042-salon-de-recyclage-et-traitement-des-dechets-](https://www.aps.dz/economie/68042-salon-de-recyclage-et-traitement-des-dechets-ouverture-de-la-2e-edition-a-oran)  
2619 [ouverture-de-la-2e-edition-a-oran](https://www.aps.dz/economie/68042-salon-de-recyclage-et-traitement-des-dechets-ouverture-de-la-2e-edition-a-oran) (2018).

2620 127 Algerie Eco. Waste sorting in Oran: Plastic bottles for telephone credit tickets.  
2621 [https://www.algerie-eco.com/2020/11/12/tri-des-dechets-a-oran-des-bouteilles-en-](https://www.algerie-eco.com/2020/11/12/tri-des-dechets-a-oran-des-bouteilles-en-plastique-contre-des-tickets-de-credit-telephonique/)  
2622 [plastique-contre-des-tickets-de-credit-telephonique/](https://www.algerie-eco.com/2020/11/12/tri-des-dechets-a-oran-des-bouteilles-en-plastique-contre-des-tickets-de-credit-telephonique/) (2020).

2623 128 R20 Regions of Climate Action. Integrated solid waste management Oran, Algeria.  
2624 <https://r20paris.org/wp-content/uploads/2016/06/oran-waste-overview301115.pdf>  
2625 (Geneva, Switzerland, 2015).

2626 129 Maha, B. Gestion et traitement des déchets à la wilaya de Constantine. Université des  
2627 Frères Mentouri Constantine (2017).

- 2628 130 Anisovich, N. Minsk and its garbage. An online map and modular sites with containers  
2629 will appear in the capital [in Russian]. [https://greenbelarus.info/articles/19-05-](https://greenbelarus.info/articles/19-05-2020/minsk-i-yago-smecce-anlayn-karta-i-modulnyya-plyacouki-z-kanteynerami-zyavyacca)  
2630 2020/minsk-i-yago-smecce-anlayn-karta-i-modulnyya-plyacouki-z-kanteynerami-  
2631 zyavyacca (2020).
- 2632 131 Johansson, K. Municipal solid waste management in Minsk-current situation, future  
2633 development and challenges. MSc Environmental Science. Thesis, Lund University  
2634 (2020).
- 2635 132 Belta. Collection of secondary raw materials in Belarus up by 3.2% in 2020.  
2636 [https://eng.belta.by/society/view/collection-of-secondary-raw-materials-in-belarus-up-by-](https://eng.belta.by/society/view/collection-of-secondary-raw-materials-in-belarus-up-by-32-in-2020-138678-2021/)  
2637 32-in-2020-138678-2021/ (2021).
- 2638 133 PwC Advisory spółka z ograniczoną odpowiedzialnością sp.k. The green city action plan  
2639 - Zenica: Bosnia and Herzegovina.  
2640 [https://www.ebrdgreencities.com/assets/Uploads/PDF/7018b505ef/Zenica-](https://www.ebrdgreencities.com/assets/Uploads/PDF/7018b505ef/Zenica-GCAP_Eng.pdf)  
2641 GCAP\_Eng.pdf (2019).
- 2642 134 Mmereki, D. Current status of waste management in Botswana: A mini-review. *Waste*  
2643 *Manage. Res.* **36**, 555-576 (2018).
- 2644 135 Gerdes, P. G., E. The waste experts: Enabling conditions for informal sector integration  
2645 in solid waste management: Lessons learned from Brazil, Egypt and India.  
2646 <https://www.giz.de/en/downloads/gtz2010-waste-experts-conditions-is-integration.pdf>  
2647 (GTZ, 2008).
- 2648 136 Wollmann, C. Análisis de la gestión de los residuos sólidos en Brasil. Una comparativa  
2649 entre las diez ciudades más grandes del país. Universitat Politècnica de Catalunya (2015).
- 2650 137 Cidade De Sao Paulo. Cooperativas. [http://www.capital.sp.gov.br/cidadao/rua-e-](http://www.capital.sp.gov.br/cidadao/rua-e-bairro/lixo/cooperativas)  
2651 bairro/lixo/cooperativas (2019).
- 2652 138 Pacheco, E. B. A. V., Ronchetti, L. M. & Masanet, E. An overview of plastic recycling in  
2653 Rio de Janeiro. *Resour. Conserv. Recycl.* **60**, 140-146 (2012).
- 2654 139 Cardoso, A. Porto Alegre, Rio Grande do Sul Brazil. [https://globalrec.org/city/porto-](https://globalrec.org/city/porto-alegre/)  
2655 alegre/ (nd).
- 2656 140 Ahlheim, M., Becker, M., Trastl, H. & Losada, Y. A. Wasted! Resource recovery and  
2657 waste management in Cuba. *Int. J. Cuban. Stud.* **11**, 147-173 (2019).
- 2658 141 EMASEO EP. Quito a Reciclar. [http://www.emaseo.gob.ec/gestion-](http://www.emaseo.gob.ec/gestion-ambiental/quitoareciclar/)  
2659 ambiental/quitoareciclar/ (2020).
- 2660 142 Zabala Celi, J. L. La industria del reciclaje en la ciudad de Quito, propuesta de modelo de  
2661 negocio para la industria de reciclaje de plástico PET. Universidad Andina Simón  
2662 Bolívar, Sede Ecuador (2018).
- 2663 143 Latitud R. Programa “Quito a reciclar” inició en multifamiliares de Quitumbe.  
2664 <https://latitudr.org/programa-quito-a-reciclar-inicio-en-multifamiliares-de-quitumbe/>  
2665 (2019).

2666 144 Ayuntamiento de Cuenca. Horario del punto limpio.  
2667 <https://medioambiente.cuenca.es/punto-limpio?AspxAutoDetectCookieSupport=1>  
2668 (2022).

2669 145 Tehran Times. 25% of waste produced in Iran recyclable: environment official.  
2670 [https://www.tehrantimes.com/news/435128/25-of-waste-produced-in-Iran-recyclable-](https://www.tehrantimes.com/news/435128/25-of-waste-produced-in-Iran-recyclable-environment-official)  
2671 [environment-official](https://www.tehrantimes.com/news/435128/25-of-waste-produced-in-Iran-recyclable-environment-official) (2019).

2672 146 Khayamabshi, E. Current status of waste management in iran and business opportunities.  
2673 <http://www.unido.or.jp/files/Iran-updated.pdf> (2016).

2674 147 Farzadkia, M., Jorfi, S., Akbari, H. & Ghasemi, M. Evaluation of dry solid waste  
2675 recycling from municipal solid waste: case of Mashhad city, Iran. *Waste Manage. Res.*  
2676 **30**, 106-112 (2012).

2677 148 Islamic Republic News Agency. The completion of Isfahan waste complex requires 50  
2678 billion tomans of facilities [in Persian]. <https://khabarban.com/a/28016140> (2019).

2679 149 Republic of Kazakhstan Strategic planning and reform agency. Waste reuse and  
2680 recycling. <https://stat.gov.kz/search/item/ESTAT368109> (2022).

2681 150 Republic of Kazakhstan of regulatory legal acts informal and legal systems. About the  
2682 draft of the decree of the president of the Republic of Kazakhstan "On the strategic plan  
2683 for the sustainable development of the city of Astana until 2030".  
2684 <https://adilet.zan.kz/kaz/docs/P060000113> (2006).

2685 151 egov. Information on waste reduction, recycling and reuse.  
2686 [https://egov.kz/cms/kk/articles/ecology/waste\\_reduction\\_recycling\\_and\\_reuse](https://egov.kz/cms/kk/articles/ecology/waste_reduction_recycling_and_reuse) (2022).

2687 152 Saleh, E. Recycling policies from the bottom up: Waste work in Lebanon.  
2688 <https://www.arab-reform.net/pdf/?pid=16284&plang=en> (Arab Reform Initiative, 2021).

2689 153 Hamdan, H. Is Lebanon's new recycling project a bunch of garbage? [https://www.al-](https://www.al-monitor.com/originals/2018/05/lebanon-beirut-municipality-hariri-paper-project-garbage.html)  
2690 [monitor.com/originals/2018/05/lebanon-beirut-municipality-hariri-paper-project-](https://www.al-monitor.com/originals/2018/05/lebanon-beirut-municipality-hariri-paper-project-garbage.html)  
2691 [garbage.html](https://www.al-monitor.com/originals/2018/05/lebanon-beirut-municipality-hariri-paper-project-garbage.html) (2018).

2692 154 Ministerio del Ambiente. Asociaciones de recicladores autorizadas para iniciar  
2693 operaciones.  
2694 [https://cdn.www.gob.pe/uploads/document/file/1234953/Asociaciones\\_de\\_Recicladores\\_](https://cdn.www.gob.pe/uploads/document/file/1234953/Asociaciones_de_Recicladores_formalizados_y_con_plan_operando_en_Lima_y_Callao.08.20.pdf)  
2695 [formalizados\\_y\\_con\\_plan\\_operando\\_en\\_Lima\\_y\\_Callao.08.20.pdf](https://cdn.www.gob.pe/uploads/document/file/1234953/Asociaciones_de_Recicladores_formalizados_y_con_plan_operando_en_Lima_y_Callao.08.20.pdf) (2020).

2696 155 Zárate, P. M. Planta de Reciclaje en Arequipa, primera especializada en plástico.  
2697 [https://elbuho.pe/2019/12/planta-de-reciclaje-en-arequipa-es-la-primera-a-nivel-nacional-](https://elbuho.pe/2019/12/planta-de-reciclaje-en-arequipa-es-la-primera-a-nivel-nacional-especializada-en-plastico/)  
2698 [especializada-en-plastico/](https://elbuho.pe/2019/12/planta-de-reciclaje-en-arequipa-es-la-primera-a-nivel-nacional-especializada-en-plastico/) (2019).

2699 156 Cruz, A. H. Evaluación de la actividad de reciclaje en Lima Norte. *Revista del Instituto*  
2700 *de investigación de la Facultad de minas, metalurgia y ciencias geográficas* **21**, 47-54  
2701 (2018).

2702 157 La República. Cercado de Lima: instalarán 8 estaciones de reciclaje.  
2703 [https://larepublica.pe/sociedad/2019/09/21/cercado-de-lima-instalaran-8-estaciones-de-](https://larepublica.pe/sociedad/2019/09/21/cercado-de-lima-instalaran-8-estaciones-de-reciclaje-municipalidad-de-lima-plastico/)  
2704 [reciclaje-municipalidad-de-lima-plastico/](https://larepublica.pe/sociedad/2019/09/21/cercado-de-lima-instalaran-8-estaciones-de-reciclaje-municipalidad-de-lima-plastico/) (2019).

2705 158 Baloy, O. *et al.* National waste information baseline report.  
2706 <http://sawic.environment.gov.za/documents/1880.pdf> (Department of Environmental  
2707 Affairs, Pretoria, 2012).

2708 159 Islamic Development Bank. Waste to energy: Averting environmental damage in  
2709 Azerbaijan. [https://www.isdb.org/sites/default/files/media/documents/2020-](https://www.isdb.org/sites/default/files/media/documents/2020-06/Success_Lflt_Azerbaijan_EN.pdf)  
2710 [06/Success\\_Lflt\\_Azerbaijan\\_EN.pdf](https://www.isdb.org/sites/default/files/media/documents/2020-06/Success_Lflt_Azerbaijan_EN.pdf) (Islamic Development Bank, Jeddah, Kingdom of  
2711 Saudi Arabia, 2020).

2712 160 Bir, R. S. Understanding the effectiveness of the current waste management system in  
2713 Thimphu City, Bhutan. Master of Science in International Cooperation Policy (Master of  
2714 Engineering in International Material Flow Management). Thesis, Ritsumeikan Asia  
2715 Pacific University (2015).

2716 161 UNDP. Incinerator for Thimphu's bio-medical and hazardous wastes.  
2717 [https://www.undp.org/bhutan/stories/incinerator-thimphus-bio-medical-and-hazardous-](https://www.undp.org/bhutan/stories/incinerator-thimphus-bio-medical-and-hazardous-wastes)  
2718 [wastes](https://www.undp.org/bhutan/stories/incinerator-thimphus-bio-medical-and-hazardous-wastes) (2021).

2719 162 Silva, L. J. d. V. B. d., Santos, I. F. S. d., Mensah, J. H. R., Gonçalves, A. T. T. & Barros,  
2720 R. M. Incineration of municipal solid waste in Brazil: An analysis of the economically  
2721 viable energy potential. *Renew. Energy* **149**, 1386-1394 (2020).

2722 163 Song, Q., Li, J., Duan, H., Yu, D. & Wang, Z. Towards to sustainable energy-efficient  
2723 city: A case study of Macau. *Renewable Sustainable Energy Rev* **75**, 504-514 (2017).

2724 164 Zero Waste Europe. Big victory: Under public pressure, waste incinerator was kicked out  
2725 of the spatial plan of Zagreb! [https://zerowasteurope.eu/2017/10/big-victory-under-](https://zerowasteurope.eu/2017/10/big-victory-under-public-pressure-waste-incinerator-was-kicked-out-of-the-spatial-plan-of-zagreb/)  
2726 [public-pressure-waste-incinerator-was-kicked-out-of-the-spatial-plan-of-zagreb/](https://zerowasteurope.eu/2017/10/big-victory-under-public-pressure-waste-incinerator-was-kicked-out-of-the-spatial-plan-of-zagreb/) (2017).

2727 165 Bianchi, M., Merger, P. & Cordella, M. CIRCTER spin-off: Switzerland and  
2728 Liechtenstein case study.  
2729 [https://www.espon.eu/sites/default/files/attachments/CIRCTER%20SPINOFF%20-](https://www.espon.eu/sites/default/files/attachments/CIRCTER%20SPINOFF%20-%20Switzerland%20and%20Liechtenstein.pdf)  
2730 [%20Switzerland%20and%20Liechtenstein.pdf](https://www.espon.eu/sites/default/files/attachments/CIRCTER%20SPINOFF%20-%20Switzerland%20and%20Liechtenstein.pdf) (2021).

2731 166 Bryne, T. The waste management system of the Principality of Monaco.  
2732 [https://wasteadvantagemag.com/international-the-waste-management-system-of-the-](https://wasteadvantagemag.com/international-the-waste-management-system-of-the-principality-of-monaco/)  
2733 [principality-of-monaco/](https://wasteadvantagemag.com/international-the-waste-management-system-of-the-principality-of-monaco/) (2015).

2734 167 JFE Engineering Corporation. Waste to energy plant for Yangon City in Myanmar final  
2735 report [https://www.env.go.jp/earth/coop/lowcarbon-](https://www.env.go.jp/earth/coop/lowcarbon-asia/english/project/data/EN_MMR_2017_03.pdf)  
2736 [asia/english/project/data/EN\\_MMR\\_2017\\_03.pdf](https://www.env.go.jp/earth/coop/lowcarbon-asia/english/project/data/EN_MMR_2017_03.pdf) (2018).

2737 168 Turilova, K. *et al.* Municipal solid waste in Ukraine: Development potential.  
2738 [https://documents1.worldbank.org/curated/zh/839801556599035128/pdf/Municipal-](https://documents1.worldbank.org/curated/zh/839801556599035128/pdf/Municipal-Solid-Waste-in-Ukraine-Development-Potential.pdf)  
2739 [Solid-Waste-in-Ukraine-Development-Potential.pdf](https://documents1.worldbank.org/curated/zh/839801556599035128/pdf/Municipal-Solid-Waste-in-Ukraine-Development-Potential.pdf) (The World Bank, Kyiv, Ukraine,  
2740 2019).

2741 169 Wansi, B. I. Zimbabwe: Waste-to-energy plant to be built in KweKwe.  
2742 <https://www.afrik21.africa/en/zimbabwe-waste-to-energy-plant-to-be-built-in-kwekwe/>  
2743 (2022).

2744 170 Badan Pusat Statistik (BPS). Indonesia Census 2020. <https://www.bps.go.id/> (2020).

- 2745 171 Premakumara, D. G. J., Abe, M. & Maeda, T., "Reducing municipal waste through  
2746 promoting integrated sustainable waste management (ISWM) practices in Surabaya city,  
2747 Indonesia" in *Ecosystems and Sustainable Development VIII* (WIT Press, 2011), pp. 457-  
2748 468.
- 2749 172 Shekdar, A. V. Sustainable solid waste management: an integrated approach for Asian  
2750 countries. *Waste Manage.* **29**, 1438-1448 (2009).
- 2751 173 Maalouf, A. & Mavropoulos, A. Re-assessing global municipal solid waste generation.  
2752 *Waste Manage. Res.* **41**, 936-947 (2022).
- 2753 174 Rosecký, M. *et al.* Predictive modelling as a tool for effective municipal waste  
2754 management policy at different territorial levels. *J. Environ. Manage.* **291**, 112584  
2755 (2021).
- 2756 175 Dissanayaka, D. M. S. H. & Vasanthapriyan, S. Forecast municipal solid waste  
2757 generation in Sri Lanka. *2019 International Conference on Advancements in Computing*  
2758 *(ICAC)*, 210-215 (2019).
- 2759 176 Ayeleru, O. O., Fajimi, L. I., Oboirien, B. O. & Olubambi, P. A. Forecasting municipal  
2760 solid waste quantity using artificial neural network and supported vector machine  
2761 techniques: A case study of Johannesburg, South Africa. *J Clean Prod* **289**, 125671  
2762 (2021).
- 2763 177 Solano Meza, J. K., Orjuela Yepes, D., Rodrigo-Illarri, J. & Cassiraga, E. Predictive  
2764 analysis of urban waste generation for the city of Bogotá, Colombia, through the  
2765 implementation of decision trees-based machine learning, support vector machines and  
2766 artificial neural networks. *Heliyon* **5**, e02810 (2019).
- 2767 178 Kumar, A., Samadder, S., Kumar, N. & Singh, C. Estimation of the generation rate of  
2768 different types of plastic wastes and possible revenue recovery from informal recycling.  
2769 *Waste Manage.* **79**, 781-790 (2018).
- 2770 179 Yang, L. *et al.* Municipal solid waste forecasting in China based on machine learning  
2771 models. *Front. Ener. Res.* **9**, 763977 (2021).
- 2772 180 Kannangara, M., Dua, R., Ahmadi, L. & Bensebaa, F. Modeling and prediction of  
2773 regional municipal solid waste generation and diversion in Canada using machine  
2774 learning approaches. *Waste Manage.* **74**, 3-15 (2018).
- 2775 181 Lebreton, L. & Andrady, A. Future scenarios of global plastic waste generation and  
2776 disposal. *Palgrave Communications* **5**, 1-11 (2019).
- 2777 182 Waste Atlas. Waste Atlas <http://www.atlas.d-waste.com/> (2022).
- 2778 183 Schiavina, M., Freire, S. & MacManus, K., GHS-POP R2022A - GHS population grid  
2779 multitemporal (1975-2030). European Commission Joint Research Centre (JRC)  
2780 <http://data.europa.eu/89h/d6d86a90-4351-4508-99c1-cb074b022c4a> (2022).
- 2781 184 Kumm, M., Taka, M. & Guillaume, J. H. A. Gridded global datasets for Gross Domestic  
2782 Product and Human Development Index over 1990–2015. *Sci. Dat.* **5**, 180004 (2018).
- 2783 185 Smits, J. & Permanyer, I. The subnational human development database. *Sci. Dat.* **6**,  
2784 190038 (2019).

2785 186 The World Bank Group. GNI per capita, atlas method (current US \$).  
2786 <https://data.worldbank.org/indicator/NY.GNP.PCAP.CD> (2015).

2787 187 Tatem, A. J. WorldPop, open data for spatial demography. *Sci. Dat.* **4**, 170004 (2017).

2788 188 Transparency International. Corruption perception index 2015.  
2789 <https://www.transparency.org/en/cpi/2015> (2015).

2790 189 Social Progress Imperative. Social progress index 2015. <https://www.socialprogress.org/>  
2791 (2015).

2792 190 The World Bank Group. International tourism, number of arrivals.  
2793 <https://data.worldbank.org/indicator/ST.INT.ARVL> (2015).

2794 191 Natural Earth. Populated places. [https://www.naturalearthdata.com/downloads/10m-](https://www.naturalearthdata.com/downloads/10m-cultural-vectors/10m-populated-places/)  
2795 [cultural-vectors/10m-populated-places/](https://www.naturalearthdata.com/downloads/10m-cultural-vectors/10m-populated-places/) (2009).

2796 192 United Nations, Methodology: Standard country or area codes for statistical use (M49) -  
2797 overview. <https://unstats.un.org/unsd/methodology/m49/overview/> (2017).

2798 193 Maffenini, L., Schiavina, M., Melchiorri, M., Pesaresi, M. & Kemper, T. GHS-DU-TUC  
2799 user guide. Report No. JRC132762, Publications Office of the European Union,  
2800 Luxembourg, 2023).

2801 194 European Commission & Eurostat. *Applying the Degree of Urbanisation : A*  
2802 *Methodological Manual to Define Cities, Towns and Rural Areas for International*  
2803 *Comparisons : 2021 Edition*. (Publications Office of the European Union,, 2021).

2804 195 Schiavina, M., Melchiorri, M. & Freire, S., GHS-DUC R2022A - GHS degree of  
2805 urbanisation classification, application of the degree of urbanisation methodology (stage  
2806 II) to GADM 3.6 layer, multitemporal (1975-2030). European Commission Joint  
2807 Research Centre (JRC) [http://data.europa.eu/89h/f5224214-6b66-43df-a9c6-](http://data.europa.eu/89h/f5224214-6b66-43df-a9c6-cc974f17d803)  
2808 [cc974f17d803](http://data.europa.eu/89h/f5224214-6b66-43df-a9c6-cc974f17d803) (2022).

2809 196 Gregorutti, B., Michel, B. & Saint-Pierre, P. Correlation and variable importance in  
2810 random forests. *Stat. Comp.* **27**, 659–678 (2017).

2811 197 International Organization for Standardization. ISO 3166-1:2020 country codes.  
2812 <https://www.iso.org/standard/72482.html> (International Organization for Standardization,  
2813 2020).

2814 198 Breiman, L. Random forests. *Machin. Learn.* **45**, 5-32 (2001).

2815 199 Biau, G. & Scornet, E. A random forest guided tour. *TEST* **25**, 197-227 (2016).

2816 200 Meinshausen, N. Quantile regression forests. *J. Machin. Learn. Res.* **7**, 983-999 (2006).

2817 201 Francke, T., López-Tarazón, J. A. & Schröder, B. Estimation of suspended sediment  
2818 concentration and yield using linear models, random forests and quantile regression  
2819 forests. *Hydrolog. Process.* **22**, 4892-4904 (2008).

2820 202 Tyralis, H., Papacharalampous, G. & Langousis, A. A brief review of random forests for  
2821 water scientists and practitioners and their recent history in water resources. *Water* **11**,  
2822 910 (2019).

- 2823 203 Probst, P., Wright, M. N. & Boulesteix, A. L. Hyperparameters and tuning strategies for  
2824 random forest. *WIREs Data Mining and Knowledge DiscoveryThe Journal of Solid Waste*  
2825 *Technology and Management* **9**, e1301 (2019).
- 2826 204 Hyndman, R. J. & Koehler, A. B. Another look at measures of forecast accuracy. *Int. J.*  
2827 *Forecasting* **22**, 679-688 (2006).
- 2828 205 Chruszcz, A. National municipal waste compositional analysis in Wales.  
2829 [http://www.wrapcymru.org.uk/sites/files/wrap/Wales%20Municipal%20Waste%20Comp](http://www.wrapcymru.org.uk/sites/files/wrap/Wales%20Municipal%20Waste%20Composition%202015-16%20FINAL.pdf)  
2830 [osition%202015-16%20FINAL.pdf](http://www.wrapcymru.org.uk/sites/files/wrap/Wales%20Municipal%20Waste%20Composition%202015-16%20FINAL.pdf) (WRAP Cymru, Cardiff, Wales, 2016).
- 2831 206 Bridgwater, E., Fletcher, E., Scholes, R., Tomes, T. & Hedger, J. National household  
2832 waste composition 2017. [https://wrap.org.uk/sites/default/files/2021-10/WRAP-national-](https://wrap.org.uk/sites/default/files/2021-10/WRAP-national-household-waste-comparison-2017.pdf)  
2833 [household-waste-comparison-2017.pdf](https://wrap.org.uk/sites/default/files/2021-10/WRAP-national-household-waste-comparison-2017.pdf) (Waste and Resources Action Programme,  
2834 Bristol, 2019).
- 2835 207 Cascadia Consulting Group. 2014 disposal-facility-based characterization of solid waste  
2836 in California. <https://www2.calrecycle.ca.gov/Publications/Download/1301> (California  
2837 Department of Resources Recycling and Recovery (CalRecycle), Sacramento, USA,  
2838 2015).
- 2839 208 BMK. Inventory of waste management in Austria - status report 2021 [in German].  
2840 [https://www.bmk.gv.at/dam/jcr:04ca87f4-fd7f-4f16-81ec-](https://www.bmk.gv.at/dam/jcr:04ca87f4-fd7f-4f16-81ec-57fca79354a0/BAWP_Statusbericht2021.pdf)  
2841 [57fca79354a0/BAWP\\_Statusbericht2021.pdf](https://www.bmk.gv.at/dam/jcr:04ca87f4-fd7f-4f16-81ec-57fca79354a0/BAWP_Statusbericht2021.pdf) (Federal Ministry for Climate Protection  
2842 Environment Energy Mobility Innovation and Technology, Vienna 2021).
- 2843 209 Tetra Tech EBA Inc. 2015 Waste Composition monitoring program. Report No. 704-  
2844 SWM.SWOP03013-01, [http://www.metrovancouver.org/services/solid-](http://www.metrovancouver.org/services/solid-waste/SolidWastePublications/2015_Waste_Composition_Report.pdf)  
2845 [waste/SolidWastePublications/2015\\_Waste\\_Composition\\_Report.pdf](http://www.metrovancouver.org/services/solid-waste/SolidWastePublications/2015_Waste_Composition_Report.pdf) (Metro Vancouver,  
2846 Vancouver, 2016).
- 2847 210 Putri, A. R., Fujimori, T. & Takaoka, M. Plastic waste management in Jakarta, Indonesia:  
2848 evaluation of material flow and recycling scheme. *J. Mater. Cycles Waste Manage.* **20**,  
2849 2140-2149 (2018).
- 2850 211 Besen, G. R. & Fracalanza, A. P. Challenges for the sustainable management of  
2851 municipal solid waste in Brazil. *Disp* **52**, 45-52 (2016).
- 2852 212 Sabedot, S. & Pereira Neto, T. Desempenho ambiental dos catadores de materiais  
2853 recicláveis em Esteio (RS). *Engenharia Sanitaria e Ambiental* **22**, 103-109 (2017).
- 2854 213 Schenck, C. J., Blaauw, P. F., Swart, E. C., Viljoen, J. M. M. & Mudavanhu, N. The  
2855 management of South Africa's landfills and waste pickers on them: Impacting lives and  
2856 livelihoods. *Devel. Southern Africa* **36**, 80-98 (2019).
- 2857 214 Velis, C. A. *et al.* An analytical framework and tool ('InteRa') for integrating the  
2858 informal recycling sector in waste and resource management systems in developing  
2859 countries. *Waste Manage. Res.* **30**, 43-66 (2012).
- 2860 215 Masood, M. & Barlow, C. Y. Framework for integration of informal waste management  
2861 sector with the formal sector in Pakistan. *Waste Manage. Res.* **31**, 93-105 (2013).



2862 216 Chandramohan, A., Ravichandran, C. & Sivasankar, V. Solid waste, its health  
2863 impairments and role of rag pickers in Tiruchirappalli city, Tamil Nadu, Southern India.  
2864 **28**, 951-958 (2010).

2865 217 Oteng-Ababio, M. The role of the informal sector in solid waste management in The  
2866 Gama, Ghana: Challenges and opportunities. *Tijdschrift voor economische en sociale*  
2867 *geografie* **103**, 412-425 (2012).

2868 218 Medina, M. Serving the unserved: informal refuse collection in Mexico. *Waste Manage.*  
2869 *Res.* **23**, 390-397 (2005).

2870 219 Gutberlet, J. & Baeder, A. M. Informal recycling and occupational health in Santo André,  
2871 Brazil. *Int. J. Environ. Health Res.* **18**, 1-15 (2008).

2872 220 Zolnikov, T. R., da Silva, R. C., Tuesta, A. A., Marques, C. P. & Cruvinel, V. R. N.  
2873 Ineffective waste site closures in Brazil: A systematic review on continuing health  
2874 conditions and occupational hazards of waste collectors. *Waste Manage.* **80**, 26-39  
2875 (2018).

2876 221 Mrkajić, V., Stanisavljevic, N., Wang, X., Tomas, L. & Haro, P. Efficiency of packaging  
2877 waste management in a European Union candidate country. *Resour. Conserv. Recycl.*  
2878 **136**, 130-141 (2018).

2879 222 Conke, L. S. Barriers to waste recycling development: Evidence from Brazil. *Resour.*  
2880 *Conserv. Recycl.* **134**, 129-135 (2018).

2881 223 Botello-Álvarez, J. E., Rivas-García, P., Fausto-Castro, L., Estrada-Baltazar, A. &  
2882 Gomez-Gonzalez, R. Informal collection, recycling and export of valuable waste as  
2883 transcendent factor in the municipal solid waste management: A Latin-American reality.  
2884 *J Clean Prod* **182**, 485-495 (2018).

2885 224 Navarrete-Hernandez, P. & Navarrete-Hernandez, N. Unleashing waste-pickers'  
2886 potential: Supporting recycling cooperatives in Santiago de Chile. *World Devel.* **101**,  
2887 293-310 (2018).

2888 225 Hartmann, C. Waste picker livelihoods and inclusive neoliberal municipal solid waste  
2889 management policies: The case of the La Chureca garbage dump site in Managua,  
2890 Nicaragua. *Waste Manage.* **71**, 565-577 (2018).

2891 226 Abledu, E. S. & Amfo-Otu, R. Contribution of Informal Sector Recycling Workers to  
2892 Sustainable Landfill Management : The Case of Kpone Landfill Site in the Greater Accra  
2893 Region. *PUCG Appl. Res. J.* **4**, 1-11 (2018).

2894 227 Vaidya, P., Kumar, R. & Sharma, D. Economics and environmental impacts of plastic  
2895 waste recycling: A case study of Mumbai. *J. Solid. Waste. Tech. Manage.* **42**, 287-297  
2896 (2016).

2897 228 Kamran, A., Chaudhry, M. N. & Batool, S. A. Role of the informal sector in recycling  
2898 waste in eastern lahore. *Pol. J. Environ. Stud.* **24**, 537-543 (2015).

2899 229 Cunningham, R. N., Simpson, C. D. & Keifer, M. C. Hazards faced by informal recyclers  
2900 in the squatter communities of Asunción, Paraguay. *Int. J. Occup. Environ. Health.* **18**,  
2901 181-187 (2012).

- 2902 230 Bhaskar, A. & Chikarmane, P. The story of waste and its reclaimers: Organising waste  
2903 collectors for better lives and livelihoods. *Indian Journal of Labour Economics* **55**, 595-  
2904 620 (2012).
- 2905 231 Asim, M., Batool, S. A. & Chaudhry, M. N. Scavengers and their role in the recycling of  
2906 waste in Southwestern Lahore. *Resour. Conserv. Recycl.* **58**, 152-162 (2012).
- 2907 232 Moniruzzaman, S. M., Bari, Q. H. & Fukuhara, T. Recycling practices of solid waste in  
2908 Khulna City, Bangladesh. *J. Solid Waste Technol. Manage.* **37**, 1-15 (2011).
- 2909 233 Nzeadibe, T. C. & Ajaero, C. K. in *Handbook of Environmental Policy* (eds Johannes  
2910 Meijer & Arjan Der Berg) Ch. 10, 243-262 (Nova Science Publishers, Inc., New York,  
2911 USA, 2010).
- 2912 234 Scheinberg, A., Spies, S., Simpson, M. H. & Mol, A. P. J. Assessing urban recycling in  
2913 low- and middle-income countries: Building on modernised mixtures. *Habitat. Int.* **35**,  
2914 188-198 (2011).
- 2915 235 Sembiring, E. & Nitivattananon, V. Sustainable solid waste management toward an  
2916 inclusive society: Integration of the informal sector. *Resour. Conserv. Recycl.* **54**, 802-  
2917 809 (2010).
- 2918 236 Hernández Romero, D. A. *et al.* Respiratory symptoms among waste-picking child  
2919 laborers a cross-sectional study. *Int. J. Occup. Environ. Health.* **16**, 124-135 (2010).
- 2920 237 Mitchell, C. L. Altered landscapes, altered livelihoods: The shifting experience of  
2921 informal waste collecting during Hanoi's urban transition. *Geoforum* **39**, 2019-2029  
2922 (2008).
- 2923 238 Zia, H., Devadas, V. & Shukla, S. Assessing informal waste recycling in Kanpur City,  
2924 India. *Manage. Environ. Qual.* **19**, 597-612 (2008).
- 2925 239 Medina, M. in *Membership Based Organizations of the Poor (Routledge Studies in*  
2926 *Development Economics)* (eds Martha Chen, Renana Jhabvala, Ravi Kanbur, & Carol  
2927 Richards) Ch. 6, 125-141 (Routledge, Oxon, UK, 2007).
- 2928 240 Masocha, M. Informal waste harvesting in Victoria Falls town, Zimbabwe: Socio-  
2929 economic benefits. *Habitat. Int.* **30**, 838-848 (2006).
- 2930 241 Kumari, S. *et al.* Recovery of consumer waste in India – A mass flow analysis for paper,  
2931 plastic and glass and the contribution of households and the informal sector. *Resour.*  
2932 *Conserv. Recycl.* **101**, 167-181 (2015).
- 2933 242 Matter, A., Ahsan, M., Marbach, M. & Zurbrügg, C. Impacts of policy and market  
2934 incentives for solid waste recycling in Dhaka, Bangladesh. *Waste Manage.* **39**, 321-328  
2935 (2015).
- 2936 243 King, M. F. & Gutberlet, J. Contribution of cooperative sector recycling to greenhouse  
2937 gas emissions reduction: A case study of Ribeirão Pires, Brazil. *Waste Manage.* **33**, 2771-  
2938 2780 (2013).
- 2939 244 Ezeah, C., Fazakerley, J. A. & Roberts, C. L. Emerging trends in informal sector  
2940 recycling in developing and transition countries. *Waste Manage.* **33**, 2509-2519 (2013).

- 2941 245 Paul, J. G., Arce-Jaque, J., Ravena, N. & Villamor, S. P. Integration of the informal  
2942 sector into municipal solid waste management in the Philippines - What does it need?  
2943 *Waste Manage.* **32**, 2018-2028 (2012).
- 2944 246 Hamidul Bari, Q., Mahbub Hassan, K. & Ehsanul Haque, M. Solid waste recycling in  
2945 Rajshahi city of Bangladesh. *Waste Manage.* **32**, 2029-2036 (2012).
- 2946 247 Steuer, B., Ramusch, R., Part, F. & Salhofer, S. Analysis of the value chain and network  
2947 structure of informal waste recycling in Beijing, China. *Resour. Conserv. Recycl.* **117**,  
2948 137-150 (2017).
- 2949 248 Linzner, R. & Salhofer, S. Municipal solid waste recycling and the significance of  
2950 informal sector in urban China. *Waste Manage. Res.* **32**, 896-907 (2014).
- 2951 249 Guo, S., Zhang, H., Minghui, Z. & Lin, A. Y. 京城十万拾荒族忐忑面对被“收编”.  
2952 <http://www.mbtsg.com/periodical/9e7d9fc1baa9b966e4c452bb5b598c9c.html> (2007).
- 2953 250 Li, X. Analysis of the reasons and ways of scavengers and their scavenging (in Chinese).  
2954 *Manage. Engin.*, 58-61 (2013).
- 2955 251 Vose, D. *Risk Analysis: A Quantitative Guide*. 3rd Ed. edn, (John Wiley & Sons Ltd.,  
2956 Chichester, UK, 2008).
- 2957 252 Wing Chau, K. The validity of the triangular distribution assumption in Monte Carlo  
2958 simulation of construction costs: empirical evidence from Hong Kong. *Construct.*  
2959 *Manage. Econ.* **13**, 15-21 (1995).
- 2960 253 SYSTEMIQ & The Pew Charitable Trust. Breaking the plastic wave.  
2961 [https://www.pewtrusts.org/-/media/assets/2020/07/breakingtheplasticwave\\_report.pdf](https://www.pewtrusts.org/-/media/assets/2020/07/breakingtheplasticwave_report.pdf)  
2962 (The Pew Charitable Trust, UK, 2020).
- 2963 254 Ahlers, J., Hemkhaus, M., Hibler, S. & Hannak, J. Analysis of extended producer  
2964 responsibility schemes: Assessing the performance of selected schemes in European and  
2965 EU countries with a focus on WEEE, waste packaging and waste batteries. [https://erp-](https://erp-recycling.org/wp-content/uploads/2021/07/adelphi_study_Analysis_of_EPR_Schemes_July_2021.pdf)  
2966 [recycling.org/wp-](https://erp-recycling.org/wp-content/uploads/2021/07/adelphi_study_Analysis_of_EPR_Schemes_July_2021.pdf)  
2967 [content/uploads/2021/07/adelphi\\_study\\_Analysis\\_of\\_EPR\\_Schemes\\_July\\_2021.pdf](https://erp-recycling.org/wp-content/uploads/2021/07/adelphi_study_Analysis_of_EPR_Schemes_July_2021.pdf)  
2968 (adelphi consult GmbH, Berlin, Germany, 2021).
- 2969 255 Sasaki, S. & Araki, T. Estimating the possible range of recycling rates achieved by dump  
2970 waste pickers: The case of Bantar Gebang in Indonesia. *Waste Manage. Res.* **32**, 474-481  
2971 (2014).
- 2972 256 Vaccari, M., Torretta, V. & Collivignarelli, C. Effect of improving environmental  
2973 sustainability in developing countries by upgrading solid waste management techniques:  
2974 A case study. *Sustainability* **4**, 2852-2861 (2012).
- 2975 257 Simatele, D. M., Dlamini, S. & Kubanza, N. S. From informality to formality:  
2976 Perspectives on the challenges of integrating solid waste management into the urban  
2977 development and planning policy in Johannesburg, South Africa. *Habitat. Int.* **63**, 122-  
2978 130 (2017).

- 2979 258 Jaligot, R., Wilson, D. C., Cheeseman, C. R., Shaker, B. & Stretz, J. Applying value  
2980 chain analysis to informal sector recycling: A case study of the Zabaleen. *Resour.*  
2981 *Conserv. Recycl.* **114**, 80-91 (2016).
- 2982 259 Andrianisa, H. A., Brou, Y. O. K. & Séhi bi, A. Role and importance of informal  
2983 collectors in the municipal waste pre-collection system in Abidjan, Côte d'Ivoire.  
2984 *Habitat. Int.* **53**, 265-273 (2016).
- 2985 260 Lino, F. & Ismail, K. Analysis of the potential of municipal solid waste in Brazil. *Environ*  
2986 *Dev* **4**, 105-113 (2012).
- 2987 261 Zhou, Y. & Xiong, H. 北京市垃圾拾荒者的资源贡献及其经济价值估测. *Ecol.*  
2988 *Econom.*, 168-171 (2010).
- 2989 262 Burneo, D., Cansino, J. M. & Yñiguez, R. Environmental and socioeconomic impacts of  
2990 urban waste recycling as part of circular economy. The case of Cuenca (Ecuador).  
2991 *Sustainability* **12**, 3406 (2020).
- 2992 263 Cajamarca Cajamarca, E. S., Bueno Sagbaicela, W. R. & y Jimbo Días, J. S. De cero a  
2993 dinero: La basura como fuente principal para un negocio inclusivo de reciclaje en Cuenca  
2994 (Ecuador). *Retos Revista de Ciencias de la Administración y Economía* **9**, 71-87 (2019).
- 2995 264 Ferronato, N., Preziosi, G., Gorritty Portillo, M. A., Guisbert Lizarazu, E. G. & Torretta,  
2996 V. Assessment of municipal solid waste selective collection scenarios with geographic  
2997 information systems in Bolivia. *Waste Manage.* **102**, 919-931 (2020).
- 2998 265 Miranda, I. T., Fidelis, R., de Souza Fidelis, D. A., Pilatti, L. A. & Picinin, C. T. The  
2999 integration of recycling cooperatives in the formal management of municipal solid waste  
3000 as a strategy for the circular economy: The case of Londrina, Brazil. *Sustainability* **12**,  
3001 10513 (2020).
- 3002 266 Rutkowski, J. E. Inclusive packaging recycling systems: Improving sustainable waste  
3003 management for a circular economy. *Detritus* **13**, 29-46 (2020).
- 3004 267 Sasaki, S. *et al.* Recycling contributions of dumpsite waste pickers in Bantar Gebang,  
3005 Indonesia. *J. Mater. Cycles Waste Manage.* **22**, 1662-1671 (2020).
- 3006 268 Regional Initiative for Inclusive Recycling. Avances en el reciclaje y en la inclusión de  
3007 recicladores básicos en el Ecuador: Diagnóstico en las ciudades de Quito, Guayaquil,  
3008 Cuenca y Manta. <https://latitudr.org/wp-content/uploads/2016/04/Reciclaje-Inclusivo-y-Recicladores-de-base-en-EC.pdf> (Regional Initiative for Inclusive Recycling, 2015).
- 3010 269 Ogwueleka, T. C. & BP, N. Activities of informal recycling sector in North-Central,  
3011 Nigeria. *Energy. Nex.* **1**, 100003 (2021).
- 3012 270 Sasaki, S., Watanabe, K., Widyaningsih, N. & Araki, T. Collecting and dealing of  
3013 recyclables in a final disposal site and surrounding slum residence: the case of Bantar  
3014 Gebang, Indonesia. *J. Mater. Cycles Waste Manage.* **21**, 375–393 (2018).
- 3015 271 OECD.Stat, Global plastics outlook. <https://stats.oecd.org/> (2022).
- 3016 272 Dimitrakakis, E., Janz, A., Bilitewski, B. & Gidakos, E. Small WEEE: Determining  
3017 recyclables and hazardous substances in plastics. *J. Hazard. Mater.* **161**, 913-919 (2009).

3018 273 Stenvall, E. Electronic waste plastics characterisation and recycling by melt-processing.  
3019 Licentiate of Engineering. Thesis, Chalmers University of Technology (2013).

3020 274 Nonclercq, A. Mapping flexible packaging in a circular economy [F.I.A.C.E]. PDEng  
3021 Chemical Product Design. Thesis, Delft University of Technology (2016).

3022 275 Cimpan, C., Bjelle, E. L. & Strømman, A. H. Plastic packaging flows in Europe: A  
3023 hybrid input-output approach. *J. Ind. Ecol.* **25**, 1572-1587 (2021).

3024 276 Europur. Flexible polyurethane foam in mattresses and furniture: an overview of possible  
3025 end of life solutions. [https://elegant-williamson.46-242-128-94.plesk.page/wp-](https://elegant-williamson.46-242-128-94.plesk.page/wp-content/uploads/2022/03/factsheetPU_final.pdf)  
3026 [content/uploads/2022/03/factsheetPU\\_final.pdf](https://elegant-williamson.46-242-128-94.plesk.page/wp-content/uploads/2022/03/factsheetPU_final.pdf) (European Association of Flexible  
3027 Polyurethane Foam Blocks Manufacturers, Brussels, Belgium, 2016).

3028 277 Antonopoulos, I., Faraca, G. & Tonini, D. Recycling of post-consumer plastic packaging  
3029 waste in the EU: Recovery rates, material flows, and barriers. *Waste Manage.* **126**, 694-  
3030 705 (2021).

3031 278 Roosen, M. *et al.* Detailed analysis of the composition of selected plastic packaging  
3032 waste products and its implications for mechanical and thermochemical recycling.  
3033 *Environ. Sci. Technol.* **54**, 13282-13293 (2020).

3034 279 MBA Polymers UK Limited. Reliable, innovative, sustainable recycled plastics.  
3035 <https://www.mbapolymers.co.uk/gb/> (2022).

3036 280 MGG Polymers GmbH. Sustainable plastics production. <https://mgg-polymers.com/>  
3037 (2022).

3038 281 PRAKTIK system s.r.o. Electrical waste recycling.  
3039 <https://www.praktiksystem.cz/electrical-waste-recycling/> (2022).

3040 282 Bage Plastics GmbH. Change perspective. Change the rules think sustainable.  
3041 <https://bage-plastics.com/de/bage-plastics/> (2022).

3042 283 Yoshida, A. *et al.* E-waste recycling processes in Indonesia, the Philippines, and  
3043 Vietnam: A case study of cathode ray tube TVs and monitors. *Resour. Conserv. Recycl.*  
3044 **106**, 48-58 (2016).

3045 284 Haarman, A., Magalini, F. & Courtois, J. Study on the impacts of brominated flame  
3046 retardants on the recycling of WEEE plastics in Europe., [https://www.bsef.com/wp-](https://www.bsef.com/wp-content/uploads/2020/11/Study-on-the-impact-of-Brominated-Flame-Retardants-BFRs-on-WEEE-plastics-recycling-by-Sofies-Nov-2020.pdf)  
3047 [content/uploads/2020/11/Study-on-the-impact-of-Brominated-Flame-Retardants-BFRs-](https://www.bsef.com/wp-content/uploads/2020/11/Study-on-the-impact-of-Brominated-Flame-Retardants-BFRs-on-WEEE-plastics-recycling-by-Sofies-Nov-2020.pdf)  
3048 [on-WEEE-plastics-recycling-by-Sofies-Nov-2020.pdf](https://www.bsef.com/wp-content/uploads/2020/11/Study-on-the-impact-of-Brominated-Flame-Retardants-BFRs-on-WEEE-plastics-recycling-by-Sofies-Nov-2020.pdf) (Sofies, 2020).

3049 285 Boudewijn, A. *et al.* Systematic quantification of waste compositions: A case study for  
3050 waste of electric and electronic equipment plastics in the European Union. *Sustainability*  
3051 **14**, 7054 (2022).

3052 286 Butturi, M. A., Marinelli, S., Gamberini, R. & Rimini, B. Ecotoxicity of plastics from  
3053 informal waste electric and electronic treatment and recycling. *Toxics* **8**, 99 (2020).

3054 287 Owusu-Sekyere, K., Batteiger, A., Afoblikame, R., Hafner, G. & Kranert, M. Assessing  
3055 data in the informal e-waste sector: The Agbogbloshie Scrapyard. *Waste Manage.* **139**,  
3056 158-167 (2022).

3057 288 Chakraborty, P. *et al.* Baseline investigation on plasticizers, bisphenol A, polycyclic  
3058 aromatic hydrocarbons and heavy metals in the surface soil of the informal electronic  
3059 waste recycling workshops and nearby open dumpsites in Indian metropolitan cities.  
3060 *Environ. Pollut.* **248**, 1036-1045 (2019).

3061 289 Chruszcz, A. & Reeve, S. Composition of plastic waste collected via kerbside: Results of  
3062 a waste compositional analysis of plastics at MRFs and PRFs.  
3063 [https://wrap.org.uk/resources/report/composition-plastic-waste-collected-](https://wrap.org.uk/resources/report/composition-plastic-waste-collected-kerbside#download-file)  
3064 [kerbside#download-file](https://wrap.org.uk/resources/report/composition-plastic-waste-collected-kerbside#download-file) (Waste and Resources Action Programme (WRAP), Banbury,  
3065 2018).

3066 290 OECD. Global plastics outlook: Economic drivers, environmental impacts and policy  
3067 options. <https://www.oecd-ilibrary.org/content/publication/de747aef-en> (OECD  
3068 Publishing, Paris, France, 2022).

3069 291 Alencar, M. V. *et al.* How far are we from robust estimates of plastic litter leakage to the  
3070 environment? *J. Environ. Manage.* **323**, 116195 (2022).

3071 292 Hernandez, J. & Fitzgerald, C. Searching for uncollected litter with computer vision.  
3072 *arXiv:2211.14743* (2022). <https://ui.adsabs.harvard.edu/abs/2022arXiv221114743H>.

3073 293 Elliott, T. *et al.* Assessment of measures to reduce marine litter from single use plastics.  
3074 [https://ec.europa.eu/environment/pdf/waste/Study\\_sups.pdf](https://ec.europa.eu/environment/pdf/waste/Study_sups.pdf) (European Commission,  
3075 Luxembourg, 2018).

3076 294 Eurostat. Municipal waste statistics. [https://ec.europa.eu/eurostat/statistics-](https://ec.europa.eu/eurostat/statistics-explained/index.php?title=Municipal_waste_statistics)  
3077 [explained/index.php?title=Municipal\\_waste\\_statistics](https://ec.europa.eu/eurostat/statistics-explained/index.php?title=Municipal_waste_statistics) (2021).

3078 295 Walker, T., Wong, T. & Wootton, R. *Effectiveness of Street Sweeping for Stormwater*  
3079 *Pollution Control*. (CRC for Catchment Hydrology, 1999).

3080 296 Department for Environment Food and Rural Affairs (Defra). Achieving improvements  
3081 in street cleansing & related services. London, 2005).

3082 297 Coffey, M. & Coad, A. *Collection of Municipal Solid Waste in Developing Countries*.  
3083 (United Nations Human Settlements Programme (UN-HABITAT), 2010).

3084 298 Yadav, V. *et al.* Framework for quantifying environmental losses of plastics from  
3085 landfills. *Resour. Conserv. Recycl.* **161**, 104914 (2020).

3086 299 Samson, O., Oluwole, A. & Abimbola, S. On the physical composition of solid wastes in  
3087 selected dumpsites of Ogbomosoland, South-Western Nigeria. *J. Wat. Res. Protect.* **3**,  
3088 661-666 (2011).

3089 300 D-Waste *et al.* The world's 50 biggest dumpsites: 2014 report. [http://www.atlas.d-](http://www.atlas.d-waste.com/Documents/Waste-Atlas-report-2014-webEdition.pdf)  
3090 [waste.com/Documents/Waste-Atlas-report-2014-webEdition.pdf](http://www.atlas.d-waste.com/Documents/Waste-Atlas-report-2014-webEdition.pdf) (D-Waste, 2014).

3091 301 Velis, C. A. & Cook, E. Mismanagement of plastic waste through open burning with  
3092 emphasis on the global south: A systematic review of risks to occupational and public  
3093 health. *Environ. Sci. Technol.* **55**, 7186-7207 (2021).

3094 302 Minnesota Population Center, Integrated public use microdata series international:  
3095 Version 7.3. IPUMS [https://international.ipums.org/international-](https://international.ipums.org/international-action/extract_requests/download)  
3096 [action/extract\\_requests/download](https://international.ipums.org/international-action/extract_requests/download) (2020).

3097 303 Brazilian Institute of Geography and Statistics - IBGE. Demographic Census 2010:  
3098 Characteristics of the population and the domiciles universe results.  
3099 <https://biblioteca.ibge.gov.br/index.php/biblioteca-catalogo?view=detalhes&id=793>  
3100 (Brazilian Institute of Geography and Statistics - IBGE, Rio de Janeiro, Brazil, 2011).

3101 304 Anguilla Statistics Department. Selected housing and household indicators – analytical  
3102 brief. [https://unstats.un.org/UNSD/Demographic/sources/census/wphc/anguilla/AIA-](https://unstats.un.org/UNSD/Demographic/sources/census/wphc/anguilla/AIA-2015-05-22.pdf)  
3103 [2015-05-22.pdf](https://unstats.un.org/UNSD/Demographic/sources/census/wphc/anguilla/AIA-2015-05-22.pdf) (Government of Anguilla, Anguilla, 2015).

3104 305 National institute of statistics and economic analysis. Main socio demographic and  
3105 economic indicators of the borgou department (RGPH-4, 2013) [in French].  
3106 [https://instad.bj/images/docs/insae-](https://instad.bj/images/docs/insae-statistiques/demographiques/population/Principaux%20Indicateurs%20avec%20projection%20RGPH4/Principaux%20indicateurs%20socio%20d%C3%A9mographiques%20et%20%C3%A9conomiques%20RGPH-4.pdf)  
3107 [statistiques/demographiques/population/Principaux%20Indicateurs%20avec%20projectio](https://instad.bj/images/docs/insae-statistiques/demographiques/population/Principaux%20Indicateurs%20avec%20projection%20RGPH4/Principaux%20indicateurs%20socio%20d%C3%A9mographiques%20et%20%C3%A9conomiques%20RGPH-4.pdf)  
3108 [ns%20RGPH4/Principaux%20indicateurs%20socio%20d%C3%A9mographiques%20et](https://instad.bj/images/docs/insae-statistiques/demographiques/population/Principaux%20Indicateurs%20avec%20projection%20RGPH4/Principaux%20indicateurs%20socio%20d%C3%A9mographiques%20et%20%C3%A9conomiques%20RGPH-4.pdf)  
3109 [%20%C3%A9conomiques%20RGPH-4.pdf](https://instad.bj/images/docs/insae-statistiques/demographiques/population/Principaux%20Indicateurs%20avec%20projection%20RGPH4/Principaux%20indicateurs%20socio%20d%C3%A9mographiques%20et%20%C3%A9conomiques%20RGPH-4.pdf) (National institute of statistics and economic  
3110 analysis (INSAE), Benin, 2016).

3111 306 INE – National Statistics Institute, Bolivia: Households according to department and  
3112 solid waste treatment, 2011-2021. INE – National Statistics Institute  
3113 [https://www.ine.gob.bo/index.php/estadisticas-sociales/vivienda-y-servicios-](https://www.ine.gob.bo/index.php/estadisticas-sociales/vivienda-y-servicios-basicos/encuestas-de-hogares-vivienda/)  
3114 [basicos/encuestas-de-hogares-vivienda/](https://www.ine.gob.bo/index.php/estadisticas-sociales/vivienda-y-servicios-basicos/encuestas-de-hogares-vivienda/) (2022).

3115 307 Statistics Botswana. Botswana demographic survey report 2017.  
3116 [https://www.statsbots.org.bw/sites/default/files/publications/Botswana%20Demographic](https://www.statsbots.org.bw/sites/default/files/publications/Botswana%20Demographic%20Survey%20Report%202017.pdf)  
3117 [%20Survey%20Report%202017.pdf](https://www.statsbots.org.bw/sites/default/files/publications/Botswana%20Demographic%20Survey%20Report%202017.pdf) (Statistics Botswana, Gaborone, Botswana, 2018).

3118 308 Ministry of Finance & Economic management. Census of population and dwellings.  
3119 [http://www.mfem.gov.ck/images/documents/Statistics\\_Docs/5.Census-Surveys/4.Census-](http://www.mfem.gov.ck/images/documents/Statistics_Docs/5.Census-Surveys/4.Census-Report/2011_Cook_Islands_Population_Census_Report.pdf)  
3120 [Report/2011\\_Cook\\_Islands\\_Population\\_Census\\_Report.pdf](http://www.mfem.gov.ck/images/documents/Statistics_Docs/5.Census-Surveys/4.Census-Report/2011_Cook_Islands_Population_Census_Report.pdf) (Government of Cook  
3121 Islands, Rarotonga, Cook Islands, 2011).

3122 309 National Institute of Statistics and Censuses (INEC), Costa Rica: Status indicators and  
3123 access to basic housing services by canton. National Institute of Statistics and Censuses  
3124 (INEC) [https://admin.inec.cr/sites/default/files/media/repoblaccenso2011-09.xls\\_0\\_2.xlsx](https://admin.inec.cr/sites/default/files/media/repoblaccenso2011-09.xls_0_2.xlsx)  
3125 (2015).

3126 310 National Office of Statistics and Information. Population and housing census Cuba 2012.  
3127 [http://www.onei.gob.cu/sites/default/files/informe\\_nacional\\_censo\\_0.pdf](http://www.onei.gob.cu/sites/default/files/informe_nacional_censo_0.pdf) (National  
3128 Office of Statistics and Information, Havana, Cuba, 2014).

3129 311 National Office for National Statistics. National household survey: HOME-2015 -  
3130 general report [in spanish].  
3131 <https://archivo.onei.gob.do/Multimedia/Download?ObjId=29305> (National Office for  
3132 National Statistics, Santo Domingo, Dominican Republic, 2016).

3133 312 Ministry of Health and Population, El-Zanaty and Associates & ICF International.  
3134 Demographic and health survey 2014.  
3135 <https://dhsprogram.com/pubs/pdf/FR302/FR302.pdf> (Ministry of Health and Population  
3136 & ICF International, Cairo, Egypt, 2015).

3137 313 General Directorate of Statistics and Census (DIGESTYC). Household survey 2019.  
3138 <https://www.transparencia.gob.sv/institutions/minec/documents/401354/download>

3139 (Ministry of Economy Government of the Republic of El Salvador General Directorate of  
3140 Statistics and Censuses, Delgado, El Salvador, 2020).

3141 314 Central Statistical Agency. Welfare monitoring survey 2015/16: Indicators on living  
3142 standard, accessibility, household assets - volume II.  
3143 <https://catalog.ihsn.org/catalog/9223/download/92816> (Central Statistical Agency, Addis  
3144 Ababa, 2016).

3145 315 Fiji Bureau of Statistics. 2017 Fiji population and housing census.  
3146 [https://www.statsfiji.gov.fj/component/advlisting/?view=download&format=raw&fileId=](https://www.statsfiji.gov.fj/component/advlisting/?view=download&format=raw&fileId=5970)  
3147 [5970](https://www.statsfiji.gov.fj/component/advlisting/?view=download&format=raw&fileId=5970) (Fiji Bureau of Statistics, Suva, Fiji, 2018).

3148 316 The Gambia Bureau of Statistics (GBoS). Environment statistics compendium.  
3149 <https://www.gbodata.org/downloads/environmental-statistics-61> (The Gambia Bureau of  
3150 Statistics (GBoS), Serrekunda, The Gambia, 2020).

3151 317 Ghana Statistical Service. Population & housing census 2010.  
3152 [https://www2.statsghana.gov.gh/nada/index.php/catalog/51/related\\_materials](https://www2.statsghana.gov.gh/nada/index.php/catalog/51/related_materials) (2012).

3153 318 National Institute of Statistics Guatemala, General household characteristics. 2018  
3154 census: Table B6.1 - Households by main form of garbage disposal, by department [in  
3155 Spanish]. National Institute of Statistics Guatemala  
3156 <https://www.censopoblacion.gt/explo/TabB6.xlsx> (2018).

3157 319 Sub Directorate of Environmental Statistics. Environmental care behavior indicators  
3158 2014.  
3159 [https://www.bps.go.id/publication/2015/12/23/2cdc2ef08c706d6f205c69fc/indikator-](https://www.bps.go.id/publication/2015/12/23/2cdc2ef08c706d6f205c69fc/indikator-perilaku-peduli-lingkungan-hidup-2014.html)  
3160 [perilaku-peduli-lingkungan-hidup-2014.html](https://www.bps.go.id/publication/2015/12/23/2cdc2ef08c706d6f205c69fc/indikator-perilaku-peduli-lingkungan-hidup-2014.html) (Central Bureau of Statistics, Jakarta,  
3161 Indonesia, 2014).

3162 320 Statistical Institute of Jamaica (SIJ), 2011 census of population and housing - Jamaica.  
3163 Statistical Institute of Jamaica (SIJ)  
3164 [https://statinja.gov.jm/Census/PopCensus/2011%20Census%20of%20Population%20and](https://statinja.gov.jm/Census/PopCensus/2011%20Census%20of%20Population%20and%20Housing%20k.pdf)  
3165 [%20Housing%20k.pdf](https://statinja.gov.jm/Census/PopCensus/2011%20Census%20of%20Population%20and%20Housing%20k.pdf) (2011).

3166 321 National Statistics Office. 2020 population and housing general report and results  
3167 [https://sdd.spc.int/digital\\_library/republic-kiribati-2020-population-and-housing-general-](https://sdd.spc.int/digital_library/republic-kiribati-2020-population-and-housing-general-report-and-results)  
3168 [report-and-results](https://sdd.spc.int/digital_library/republic-kiribati-2020-population-and-housing-general-report-and-results) (Ministry of Finance, Tarawa, Republic of Kiribati, 2021).

3169 322 National Statistical Office. 2018 Malawi population and housing census.  
3170 [http://www.nsomalawi.mw/index.php?option=com\\_content&view=article&id=226:2018-](http://www.nsomalawi.mw/index.php?option=com_content&view=article&id=226:2018-malawi-population-and-housing-census&catid=8:reports&Itemid=6)  
3171 [malawi-population-and-housing-census&catid=8:reports&Itemid=6](http://www.nsomalawi.mw/index.php?option=com_content&view=article&id=226:2018-malawi-population-and-housing-census&catid=8:reports&Itemid=6) (National Statistical  
3172 Office, Zomba, Malawi, 2020).

3173 323 National Institute of Statistics and Geography (INEG). Environmental information  
3174 compendium. <https://www.inegi.org.mx/app/biblioteca/ficha.html?upc=702825189518>  
3175 (National Institute of Statistics and Geography (INEG), Aguascalientes, Mexico, 2020).

3176 324 Namibia Statistics Agency (NSA). Namibia population and housing census 2011.  
3177 <https://nada.nsa.org.na/index.php/catalog/19/related-materials> (Namibia Statistics Agency  
3178 (NSA), Windhoek, Namibia, 2012).



3179 325 National Institute of Development Information (INIDE). Housing report: Continuous  
3180 household survey (ECH) 2019 - 2020 [In Spanish].  
3181 [https://www.inide.gob.ni/docs/Ech/2020/INFORME\\_DE\\_CARACTERISTICAS\\_DE\\_L](https://www.inide.gob.ni/docs/Ech/2020/INFORME_DE_CARACTERISTICAS_DE_LAS_VIVIENDAS2019_2020.pdf)  
3182 [AS\\_VIVIENDAS2019\\_2020.pdf](https://www.inide.gob.ni/docs/Ech/2020/INFORME_DE_CARACTERISTICAS_DE_LAS_VIVIENDAS2019_2020.pdf) (National Institute of Development Information  
3183 (INIDE), Managua, Nicaragua, 2021).

3184 326 National Statistics Institute (INE). Paraguay statistical yearbook 2019.  
3185 <https://www.ine.gov.py/resumen/MTcz/anuario-estadistico-2019> (National Statistics  
3186 Institute (INE), Fernando de la Mora, Paraguay, 2021).

3187 327 Samoa Bureau of Statistics. Samoa's experimental solid waste accounts FY2013-14 to  
3188 FY2015-16.  
3189 [https://www.sbs.gov.ws/digi/Samoa's%20Experimental%20Solid%20Waste%20Arrounts](https://www.sbs.gov.ws/digi/Samoa's%20Experimental%20Solid%20Waste%20Arrounts_2013-2014%20to%202015-2016.pdf)  
3190 [\\_2013-2014%20to%202015-2016.pdf](https://www.sbs.gov.ws/digi/Samoa's%20Experimental%20Solid%20Waste%20Arrounts_2013-2014%20to%202015-2016.pdf) (Samoa Bureau of Statistics, Apia, Samoa, 2019).

3191 328 Statistics Sierra Leone. Sierra Leone 2015 population and housing census: National  
3192 analytical report.  
3193 [https://www.statistics.sl/images/StatisticsSL/Documents/Census/2015/2015\\_census\\_natio](https://www.statistics.sl/images/StatisticsSL/Documents/Census/2015/2015_census_national_analytical_report.pdf)  
3194 [nal\\_analytical\\_report.pdf](https://www.statistics.sl/images/StatisticsSL/Documents/Census/2015/2015_census_national_analytical_report.pdf) (Statistics Sierra Leone, Freetown, Sierra Leone, 2017).

3195 329 Department of Census and Statistics. Census of population and housing 2012: Provisional  
3196 information based on 5% sample.  
3197 [http://www.statistics.gov.lk/Population/StaticalInformation/CPH2011/Census2012Result](http://www.statistics.gov.lk/Population/StaticalInformation/CPH2011/Census2012ResultsPopulationHousingBased5Sample)  
3198 [sPopulationHousingBased5Sample](http://www.statistics.gov.lk/Population/StaticalInformation/CPH2011/Census2012ResultsPopulationHousingBased5Sample) (Ministry of Finance and Planning, Colombo, Sri  
3199 Lanka, 2012).

3200 330 Central Statistics Office. 2010 population and housing census preliminary report  
3201 (Updated April 2011). <https://catalog.ihsn.org/catalog/4328/download/56501> (Central  
3202 Statistics Office, Castries, St Lucia, 2011).

3203 331 National Bureau of Statistics. Housing condition, household amenities and assets  
3204 monograph: 2012 population and housing census volume IV.  
3205 [https://www.nbs.go.tz/index.php/en/census-surveys/population-and-housing-](https://www.nbs.go.tz/index.php/en/census-surveys/population-and-housing-census?start=10)  
3206 [census?start=10](https://www.nbs.go.tz/index.php/en/census-surveys/population-and-housing-census?start=10) (National Bureau of Statistics, Zanzibar, Tanzania, 2015).

3207 332 Tonga Statistics Department. Tonga 2016 census of population and housing: Volume 1:  
3208 Basic tables and administrative report - second edition.  
3209 [https://sdd.spc.int/digital\\_library/tonga-2016-census-population-and-housing-volume-1-](https://sdd.spc.int/digital_library/tonga-2016-census-population-and-housing-volume-1-basic-tables-and-administrative)  
3210 [basic-tables-and-administrative](https://sdd.spc.int/digital_library/tonga-2016-census-population-and-housing-volume-1-basic-tables-and-administrative) (Tonga Statistics Department, Nuku'alofa, Tonga, 2018).

3211 333 Uganda Bureau of Statistics. Uganda national household survey 2016/2017 report.  
3212 <https://catalog.ihsn.org/catalog/9249/download/92938> (Uganda Bureau of Statistics,  
3213 Kampala, Uganda, 2018).

3214 334 Palestinian Central Bureau of Statistics. Population, housing and establishments census  
3215 2017: Housing report - final results - Palestine. Report No. 2444,  
3216 <https://www.pcbs.gov.ps/Downloads/book2444.pdf> (Palestinian Central Bureau of  
3217 Statistics, Ramallah, Palestine, 2019).

3218 335 KANTAR. Burning in UK homes and gardens. Report No. PB 14644,  
3219 <https://randd.defra.gov.uk/ProjectDetails?ProjectID=20159&FromSearch=Y&Publisher=>

3220 1&SearchText=AQ1017&SortString=ProjectCode&SortOrder=Asc&Paging=10#Descrip  
3221 tion (Department for Environment Food and Rural Affairs, London, UK, 2020).

3222 336 Copping, S., Quinn, C. & Gregory, R. Review and investigation of deep-seated fires  
3223 within landfill sites. Report No. SC010066,  
3224 [https://assets.publishing.service.gov.uk/government/uploads/system/uploads/attachment\\_  
3225 data/file/291589/scho0307bmco-e-e.pdf](https://assets.publishing.service.gov.uk/government/uploads/system/uploads/attachment_data/file/291589/scho0307bmco-e-e.pdf) (Environment Agency, Bristol, UK, 2007).

3226 337 Bates, M. Managing landfill site fires in Northamptonshire.  
3227 [http://cfps.org.uk.surface3.vm.bytemark.co.uk/domains/cfps.org.uk/local/media/library/6  
3228 77.pdf](http://cfps.org.uk.surface3.vm.bytemark.co.uk/domains/cfps.org.uk/local/media/library/677.pdf) (Environment and Transport Scrutiny Committee: Northamptonshire County  
3229 Council, Northampton, 2004).

3230 338 Dlamini, W. M. *et al.* National inventory on open burning practices and unintentional  
3231 persistent organic pollutants (UPOPS) releases.  
3232 [https://stopopenburning.unitar.org/site/assets/files/1089/eswatini-  
3233 \\_inventory\\_report\\_for\\_open\\_burning\\_project-\\_oct2017.pdf](https://stopopenburning.unitar.org/site/assets/files/1089/eswatini-_inventory_report_for_open_burning_project-_oct2017.pdf) (Swaziland Environment  
3234 Authority (SEA), Swaziland, 2017).

3235 339 Wang, Y. *et al.* Atmospheric emissions of typical toxic heavy metals from open burning  
3236 of municipal solid waste in China. *Atmos. Environ.* **152**, 6-15 (2017).

3237 340 IPCC, R. IPCC guidelines for national greenhouse gas inventories. *Prepared by the  
3238 national greenhouse gas inventories programme*, 10-11 (2006).

3239 341 Wiedinmyer, C., Yokelson, R. J. & Gullett, B. K. Global emissions of trace gases,  
3240 particulate matter, and hazardous air pollutants from open burning of domestic waste.  
3241 *Environ. Sci. Technol.* **48**, 9523-9530 (2014).

3242 342 National Environmental Engineering Research Institute. Air quality assessment,  
3243 emissions inventory and source apportionment studies: Mumbai.  
3244 [http://mpcb.gov.in/ereports/pdf/Mumbai\\_report\\_cpcb.pdf](http://mpcb.gov.in/ereports/pdf/Mumbai_report_cpcb.pdf) (Central Pollution Control  
3245 Board - New Delhi, Mumbai, 2010).

3246 343 Bihałowicz, J. S., Rogula-Kozłowska, W. & Krasuski, A. Contribution of landfill fires to  
3247 air pollution – An assessment methodology. *Waste Manage.* **125**, 182-191 (2021).

3248 344 Graedel, T. E. Material flow analysis from origin to evolution. *Environ. Sci. Technol.* **53**,  
3249 12188-12196 (2019).

3250 345 Brunner, P. H. & Rechberger, H. *Practical Handbook of Material Flow Analysis: For  
3251 Environmental, Resource, and Waste Engineers.* (CRC press, 2016).

3252 346 Meylan, G., Reck, B. K., Rechberger, H., Graedel, T. E. & Schwab, O. Assessing the  
3253 reliability of material flow analysis results: The cases of rhenium, gallium, and  
3254 germanium in the United States economy. *Environ. Sci. Technol.* **51**, 11839-11847  
3255 (2017).

3256 347 Tanzer, J. & Rechberger, H. Setting the common ground: A generic framework for  
3257 material flow analysis of complex systems. *Recycling* **4**, 23 (2019).

3258 348 Wang, Y. & Ma, H. W. Analysis of uncertainty in material flow analysis. *J Clean Prod*  
3259 **170**, 1017-1028 (2018).

3260 349 Gottschalk, F., Scholz, R. W. & Nowack, B. Probabilistic material flow modeling for  
3261 assessing the environmental exposure to compounds: Methodology and an application to  
3262 engineered nano-TiO<sub>2</sub> particles. *Environ. Model. Software* **25**, 320-332 (2010).

3263 350 Kawecki, D. & Nowack, B. Polymer-specific modeling of the environmental emissions  
3264 of seven commodity plastics as macro-and microplastics. *Environ. Sci. Technol.* **53**,  
3265 9664-9676 (2019).

3266 351 Kawecki, D., Scheeder, P. R. W. & Nowack, B. Probabilistic material flow analysis of  
3267 seven commodity plastics in Europe. *Environ. Sci. Technol.* **52**, 9874-9888 (2018).

3268 352 Kawecki, D. & Nowack, B. A proxy-based approach to predict spatially resolved  
3269 emissions of macro- and microplastic to the environment. *Sci. Total Environ.* **748**,  
3270 141137 (2020).

3271 353 Bornhöft, N. A., Nowack, B. & Hilty, L. M. Representation, propagation, and  
3272 interpretation of uncertain knowledge in dynamic probabilistic material flow models.  
3273 *Environmental Modeling & Assessment* **26**, 709-721 (2021).

3274 354 Sieber, R., Kawecki, D. & Nowack, B. Dynamic probabilistic material flow analysis of  
3275 rubber release from tires into the environment. *Environ. Pollut.* **258**, 113573 (2020).

3276 355 Kawecki, D., Goldberg, L. & Nowack, B. Material flow analysis of plastic in organic  
3277 waste in Switzerland. *Soil. Use, Manage.* **37**, 277-288 (2021).

3278 356 UNEP. Resolution adopted by the United Nations Environment Assembly on 2 March  
3279 2022, UNEP/EA.5/Res.14.  
3280 [https://wedocs.unep.org/xmlui/bitstream/handle/20.500.11822/39764/END%20PLASTIC](https://wedocs.unep.org/xmlui/bitstream/handle/20.500.11822/39764/END%20PLASTIC%20POLLUTION%20-%20TOWARDS%20AN%20INTERNATIONAL%20LEGALLY%20BINDING%20INSTRUMENT%20-%20English.pdf?sequence=1&isAllowed=y)  
3281 [%20POLLUTION%20-](https://wedocs.unep.org/xmlui/bitstream/handle/20.500.11822/39764/END%20PLASTIC%20POLLUTION%20-%20TOWARDS%20AN%20INTERNATIONAL%20LEGALLY%20BINDING%20INSTRUMENT%20-%20English.pdf?sequence=1&isAllowed=y)  
3282 [%20TOWARDS%20AN%20INTERNATIONAL%20LEGALLY%20BINDING%20INS](https://wedocs.unep.org/xmlui/bitstream/handle/20.500.11822/39764/END%20PLASTIC%20POLLUTION%20-%20TOWARDS%20AN%20INTERNATIONAL%20LEGALLY%20BINDING%20INSTRUMENT%20-%20English.pdf?sequence=1&isAllowed=y)  
3283 [TRUMENT%20-%20English.pdf?sequence=1&isAllowed=y](https://wedocs.unep.org/xmlui/bitstream/handle/20.500.11822/39764/END%20PLASTIC%20POLLUTION%20-%20TOWARDS%20AN%20INTERNATIONAL%20LEGALLY%20BINDING%20INSTRUMENT%20-%20English.pdf?sequence=1&isAllowed=y) (Nairobi, 2022).

3284 357 Kantai, T., Hengesbaugh, M., Hovden, K. & Pinto-Bazurco, J. F. Summary of the second  
3285 meeting of the intergovernmental negotiating committee to develop an international  
3286 legally binding instrument on plastic pollution: 29 May – 2 June 2023. *Earth. Neg. Bull.*  
3287 **36**, 1-12 (2023).

3288 358 Mihai, F. C. *et al.* Plastic pollution, waste management issues, and circular economy  
3289 opportunities in rural communities. *Sustainability* **14**, 20 (2022).

3290 359 Hoornweg, D. & Bhada-Tata, P. What a waste: A global review of solid waste  
3291 management.  
3292 [https://siteresources.worldbank.org/INTURBANDEVELOPMENT/Resources/336387-](https://siteresources.worldbank.org/INTURBANDEVELOPMENT/Resources/336387-1334852610766/What_a_Waste2012_Final.pdf)  
3293 [1334852610766/What\\_a\\_Waste2012\\_Final.pdf](https://siteresources.worldbank.org/INTURBANDEVELOPMENT/Resources/336387-1334852610766/What_a_Waste2012_Final.pdf) (Urban Development & Local  
3294 Government Unit - World Bank, Washington, DC, USA, 2012).

3295 360 Karak, T., Bhagat, R. M. & Bhattacharyya, P. Municipal solid waste generation,  
3296 composition, and management: The world scenario. *Crit. Rev. Environ. Sci. Technol.* **42**,  
3297 1509-1630 (2012).

3298 361 Hidalgo, D., Corona, F. & Martín-Marroquín, J., "Municipal waste management in  
3299 remote areas of Spain: islands and rural communities" in Proceedings from 4th

3300 International Conference on Sustainable Solid Waste Management, Limassol (2016), pp.  
3301 25.

3302 362 GADM, GADM data (version 4.1). GADM <https://gadm.org/data.html> (2022).

3303 363 Defra, Local authority collected waste statistics - local authority data. Department for  
3304 Environment Food & Rural Affairs (Defra)  
3305 [https://assets.publishing.service.gov.uk/government/uploads/system/uploads/attachment\\_](https://assets.publishing.service.gov.uk/government/uploads/system/uploads/attachment_data/file/1144270/LA_and_Regional_Spreadsheet_202122.xlsx)  
3306 [data/file/1144270/LA\\_and\\_Regional\\_Spreadsheet\\_202122.xlsx](https://assets.publishing.service.gov.uk/government/uploads/system/uploads/attachment_data/file/1144270/LA_and_Regional_Spreadsheet_202122.xlsx) (2023).

3307 364 Taghipour, H., Amjad, Z., Aslani, H., Armanfar, F. & Dehghanzadeh, R. Characterizing  
3308 and quantifying solid waste of rural communities. *J. Mater. Cycles Waste Manage.* **18**,  
3309 790-797 (2016).

3310 365 Rajpal, A., Kazmi, A. A. & Tyagi, V. K. Solid waste management in rural areas nearby  
3311 river Ganga at Haridwar in Uttarakhand, India. *J. Appl. Nat. Sci.* **12**, 592-598 (2020).

3312 366 Syafrudin, S., Masjhoer, J. M. & Maryono, M. Characterization and quantification of  
3313 solid waste in rural regions. *Glob. J. Environ. Sci. Manag.* **9**, 337-352 (2023).

3314 367 Asgari, A. R. *et al.* Solid waste characterization and management practices in rural  
3315 communities, Tehran and Alborz (Iran). *J. Solid. Waste. Tech. Manage.* **45**, 111-118  
3316 (2019).

3317 368 Elhamdouni, D., Arioua, A., Karaoui, I., Baaddi, A. & Ouhamchich, K. A. Household  
3318 solid waste sustainable management in the Khenifra region, Morocco. *Arab. J. Geosci.*  
3319 **12**, 744 (2019).

3320 369 Edjabou, M. E., Møller, J. & Christensen, T. H. Solid waste characterization in Kétao, a  
3321 rural town in Togo, West Africa. *Waste Manage. Res.* **30**, 745-749 (2012).

3322 370 Rodrigo-Illari, J., Vargas-Terranova, C. A., Rodrigo-Clavero, M. E. & Bustos-Castro, P.  
3323 A. Advances on the implementation of circular economy techniques in rural areas in  
3324 Colombia under a sustainable development framework. *Sustainability* **13**, 3816 (2021).

3325 371 Taboada-González, P., Aguilar-Virgen, Q., Ojeda-Benítez, S. & Armijo, C. Waste  
3326 characterization and waste management perception in rural communities in Mexico: A  
3327 case study. *Environ. Eng. Manage. J.* **10**, 1751-1759 (2011).

3328 372 Emara, K. Sustainable solid waste management in rural areas: A case study of Fayoum  
3329 governorate, Egypt. *Energy. Nex.* **9**, 100168 (2023).

3330 373 Bernardes, C. & Günther, W. M. R. Generation of domestic solid waste in rural areas:  
3331 Case study of remote communities in the Brazilian Amazon. *Human Ecology* **42**, 617-623  
3332 (2014).

3333 374 Ministry of Environment of The Republic of Moldova. National waste management  
3334 strategy of The Republic of Moldova (2013-2027).  
3335 [https://serviciulocale.md/public/files/deseuri/2013\\_01\\_24\\_NATIONAL\\_WASTE\\_MAN](https://serviciulocale.md/public/files/deseuri/2013_01_24_NATIONAL_WASTE_MANAGEMENT_STRATEGY_2013-27_ENG.pdf)  
3336 [AGEMENT\\_STRATEGY\\_2013-27\\_ENG.pdf](https://serviciulocale.md/public/files/deseuri/2013_01_24_NATIONAL_WASTE_MANAGEMENT_STRATEGY_2013-27_ENG.pdf) (Chisinau, Moldova, 2013).

3337 375 Collaguazo, G., Badea, A., Stan, C. & Pásztai, Z. Household wastes characterization and  
3338 seasonal variations in Bihor County, Romania *Sci. Bullet. Ser. C - Electri. Eng. Comp.*  
3339 *Sci.* **78**, 281-290 (2016).

3340 376 Ciuta, S., Apostol, T. & Rusu, V. Urban and rural MSW stream characterization for  
3341 separate collection improvement. *Sustainability* **7**, 916-931 (2015).

3342 377 European Union. Council Directive 1999/31/EC of 26 April 1999 on the landfill of waste.  
3343 [https://eur-](https://eur-lex.europa.eu/LexUriServ/LexUriServ.do?uri=CELEX:31999L0031:EN:HTML)  
3344 [lex.europa.eu/LexUriServ/LexUriServ.do?uri=CELEX:31999L0031:EN:HTML](https://eur-lex.europa.eu/LexUriServ/LexUriServ.do?uri=CELEX:31999L0031:EN:HTML) (The  
3345 Council of the European Union, 1999).

3346 378 OECD. Municipal waste, generation and treatment.  
3347 <https://stats.oecd.org/index.aspx?DataSetCode=MUNW> (2022).

3348 379 Eurostat. Treatment of waste by waste category, hazardousness and waste management  
3349 operations.  
3350 [https://ec.europa.eu/eurostat/databrowser/view/env\\_wasrt/default/table?lang=en](https://ec.europa.eu/eurostat/databrowser/view/env_wasrt/default/table?lang=en) (2022).

3351 380 Ding, Y. *et al.* A review of China's municipal solid waste (MSW) and comparison with  
3352 international regions: Management and technologies in treatment and resource utilization.  
3353 *J Clean Prod* **293**, 126144 (2021).

3354 381 Lu, J. W., Zhang, S., Hai, J. & Lei, M. Status and perspectives of municipal solid waste  
3355 incineration in China: A comparison with developed regions. *Waste Manage.* **69**, 170-186  
3356 (2017).

3357 382 Kovalenko, V. V. *et al.*, "Problem of municipal solid waste of Ukraine and ways to solve  
3358 it" in IOP Conference Series: Earth and Environmental Science (2022).

3359 383 DBPR. Data from: A local-to-global emissions inventory of macroplastic pollution.  
3360 INSERT DOI when created (Dryad, 2023).

3361 384 OECD.Stat. OECD.Stat: Regions and cities. <https://stats.oecd.org/> (2023).

3362 385 Saltelli, A., Tarantola, S., Campolongo, F. & Ratto, M. *Sensitivity Analysis in Practice: A*  
3363 *Guide to Assessing Scientific Models*. (John Wiley & Sons, Ltd, Chichester, UK, 2004).

3364 386 Sobol, I. M. Sensitivity estimates for nonlinear mathematical models. *Math. Model.*  
3365 *Comp. Exper.* **4**, 407-414 (1993).
