# Supplementary material for: A local-to-global emissions inventory of macroplastic pollution
Source: Research Square preprint supplement (doi:10.21203/rs.3.rs-3376960/v1), 2023-10-23
Supplement: Supplementary file 1 [file 2f18388a5688ff71a642a15c.xlsx]

## Sheet: 00_Info
	Supplementary material for	A local-to-global emissions inventory of macroplastic pollution
	Software	Spatio-temporal plastic pollution origins and transport model (SPOT)
	Software version number	V1.0.0-G-092023
	Release date	2023-09-21
	Dataset name	ST_02_SPOT_System_of_Equations.xls
	Authors	DBPR
	Correspondence	DBPR
	Correspondence to	DBPR
	Dataset description	System of equations for the material flow system.
	Contents
	01_System_of_equations	System of equations through which the mass of material is modelled through probabilistic MFA.
	01a_Process_names_units	Naming convention and units for processes.
	01b_Coefficient_names_units	Naming convention and units for Coefficients.
	01c_Output_names_units	Naming convention and units for Outputs.

## Sheet: 01_System_of_equations
	Component code naming convention:
	tP = Tributary model process
	tC = Tributary model transfer coefficient
	P = Process
	Pa = Process for material type of plastic
	Paa = Process for material type rigid plastic
	Pab = Process for material type flexible plastic
	C = Transfer coefficient
	Ca = Transfer coefficient applied to process of material type plastic
	Caa = Transfer coefficient applied to process of material type rigid plastic
	Cab = Transfer coefficient applied to process of material type flexible plastic
	Type	Input	Input type	MFA model	Component code	Description	Material	Unit	Name	Equation
	Input	Yes	Random forest output	Tributary MSW MFA	tP1pc	MSW generation rate (per capita)	MSW	kg·cap-1·d-1	tP1pc_MSW generation rate (per capita)	NA
	Input	Yes	Constant for each municipality	Tributary MSW MFA	Pop	Population of municipality	NA	People	Pop_Population of municipality	NA
	Process	No		Tributary MSW MFA	tP1	MSW generated (tributary model)	MSW	t·y-1	tP1_MSW generated (tributary model)	tP1 = (tP1pc × Pop × 365)/1000
	Process	No		Tributary MSW MFA	tP2	MSW collected (tributary model)	MSW	t·y-1	tP2_MSW collected (tributary model)	tP2 = tP1 × (tC1 / 100)
	Process	No		Tributary MSW MFA	tP3	MSW collected for diposal (tributary model)	MSW	t·y-1	tP3_MSW collected for diposal (tributary model)	tP3 = tP2 × (1- (tC2/100))
	Process	No		Tributary MSW MFA	tP4	MSW collected for treatment or recovery (tributary model)	MSW	t·y-1	tP4_MSW collected for treatment or recovery (tributary model)	tP4 = tP2 × (tC2/100)
	Process	No		Tributary MSW MFA	tP5	Controlled disposal of MSW (tributary model)	MSW	t·y-1	tP5_Controlled disposal of MSW (tributary model)	tP5 = tP3 × (tC3/100)
	Process	No		Tributary MSW MFA	tP4i	Dry recyclables collected by formal sector (tributary model)	MSW	t·y-1	tP4i_Dry recyclables collected by formal sector (tributary model)	tP4i = tP2 × (tC2i/100)
	Process	No		Tributary MSW MFA	tP4ii	Other recovery of MSW (tributary model)	MSW	t·y-1	tP4ii_Other recovery of MSW (tributary model)	tP4i = tP2 × (tC2ii/100)
	Process	No		Tributary MSW MFA	tP4iii	Incineration (tributary model)	MSW	t·y-1	tP4iii_Incineration (tributary model)	tP4i = tP2 × (tC2iii/100)
	Process	No		Tributary MSW MFA	tP8	Uncollected MSW (tributary model)	MSW	t·y-1	tP8_Uncollected MSW (tributary model)	tP8 = tP1 × (1-(tC1/100))
	Process	No		Tributary MSW MFA	tP9	Uncontrolled disposal of MSW (tributary model)	MSW	t·y-1	tP9_Uncontrolled disposal of MSW (tributary model)	tP9 = tP3 × (1-(tC3/100))
	Transfer coefficient	Yes	Random forest output	Tributary MSW MFA	tC1	Collection coverage as % of MSW generated	MSW	% generated MSW	tC1_Collection coverage as % of MSW generated	NA
	Transfer coefficient	Yes	Random forest output	Tributary MSW MFA	tC2i	Formal sector collection of MSW for dry recycling as % of collected MSW	MSW	% collected MSW	tC2i_Formal sector collection of MSW for dry recycling as % of collected MSW	NA
	Transfer coefficient	Yes	Random forest output	Tributary MSW MFA	tC2ii	Formal sector collection of MSW for other recovery as % of collected MSW	MSW	% collected MSW	tC2ii_Formal sector collection of MSW for other recovery as % of collected MSW	NA
	Transfer coefficient	Yes	Random forest output	Tributary MSW MFA	tC2iii	Formal sector collection of MSW for incineration as % of collected MSW	MSW	% collected MSW	tC2iii_Formal sector collection of MSW for incineration as % of collected MSW	NA
	Transfer coefficient	No		Tributary MSW MFA	tC2	Collected MSW for treatment or recovery as % of collected MSW	MSW	% collected MSW	tC2_Collected MSW for treatment or recovery as % of collected MSW	tC2 = tC2i+tC2ii+tC2iii
	Transfer coefficient	Yes	Random forest output	Tributary MSW MFA	tC3	Controlled disposal of MSW as % of collected MSW for disposal	MSW	% collected MSW for disposal	tC3_Controlled disposal of MSW as % of collected MSW for disposal	NA
	Mass balance check	No		Tributary MSW MFA	-	Mass balance for tributary MSW MFA	MSW	t·y-1		tP1 - (tP4i + tP4ii + tP4iii + tP5 + tP8 + tP9) = 0
	Input	Yes	Constant for each municipality	Full MSA MFA	UCentre_share_2020	Fraction of municipal population classified as living in an urban centre for year 2020	NA	% of population	UCentre_share_2020_Fraction of municipal population classified as living in an urban centre for year 2020	NA
	Input	Yes	Constant for each municipality	Full MSA MFA	DUC_share_2020	Fraction of municipal population classified as living in an dense urban cluster for year 2020	NA	% of population	DUC_share_2020_Fraction of municipal population classified as living in an dense urban cluster for year 2020	NA
	Input	Yes	Constant for each municipality	Full MSA MFA	SDUC_share_2020	Fraction of municipal population classified as living in an semi-dense urban cluster for year 2020	NA	% of population	SDUC_share_2020_Fraction of municipal population classified as living in an semi-dense urban cluster for year 2020	NA
	Input	Yes	Constant for each municipality	Full MSA MFA	Surb_share_2020	Fraction of municipal population classified as living in an suburban area for year 2020	NA	% of population	Surb_share_2020_Fraction of municipal population classified as living in an suburban area for year 2020	NA
	Input	Yes	Constant for each municipality	Full MSA MFA	Rural_share_2020	Fraction of municipal population classified as in rural area for year 2020	NA	% of population	Rural_share_2020_Fraction of municipal population classified as in rural area for year 2020	NA
	Process	No		Full MSA MFA	P1	MSW generated	MSW	t·y-1	P1_MSW generated	P1 = P3 / (1-(C1/100))
	Process	No		Full MSA MFA	P2	Uncollected litter	MSW	t·y-1	P2_Uncollected litter	P2 = P1 × (C1/100)
	Process	No		Full MSA MFA	P3	Generated MSW excluding uncollected litter	MSW	t·y-1	P3_Generated MSW excluding uncollected litter	P3 = P4 + P5
	Process	Yes	Tributary MFA output	Full MSA MFA	P4	Uncollected MSW	MSW	t·y-1	P4_Uncollected MSW	P4 = tP8
	Process	No		Full MSA MFA	P5	Collected MSW	MSW	t·y-1	P5_Collected MSW	P5 = P7 / (1-(C3/100))
	Process	No		Full MSA MFA	P6	Collection system debris emissions	MSW	t·y-1	P6_Collection system debris emissions	P6 = P5 × (C3/100)
	Process	No		Full MSA MFA	P7	Collected and delivered MSW	MSW	t·y-1	P7_Collected and delivered MSW	P7 = P8 + P9
	Process	No		Full MSA MFA	P8	Collected MSW for disposal	MSW	t·y-1	P8_Collected MSW for disposal	P8 = P10 + P11
	Process	No		Full MSA MFA	P9	Collected MSW for treatment or recovery	MSW	t·y-1	P9_Collected MSW for treatment or recovery	P9 = P12i + P12ii + P13
	Process	Yes	Tributary MFA output	Full MSA MFA	P10	Uncontrolled disposal of MSW	MSW	t·y-1	P10_Uncontrolled disposal of MSW	P10 = tP9
	Process	Yes	Tributary MFA output	Full MSA MFA	P11	Controlled disposal of MSW	MSW	t·y-1	P11_Controlled disposal of MSW	P11 = tP5
	Process	Yes	Tributary MFA output	Full MSA MFA	P12i	Other treatement of MSW (composting, AD)	MSW	t·y-1	P12i_Other treatement of MSW (composting, AD)	P12i = tP4ii
	Process	No		Full MSA MFA	P13	Collected for dry recycling	MSW	t·y-1	P13_Collected for dry recycling	P13 = P14 + P15
	Input	Yes	Probability density function	Full MSA MFA	WP	Number of waste pickers	MSW	people	WP_Number of waste pickers	NA
	Input	Yes	Probability density function	Full MSA MFA	WPp	Productivity of waste pickers	MSW	kg·cap-1·y-1	WPp_Productivity of waste pickers	NA
	Process	No		Full MSA MFA	P14	Informal sector collection for dry recycling	MSW	t·y-1	P14_Informal sector collection for dry recycling	P14 = WP × (Pop × (1 - (Pop_r/100))) × WPp
	Process	Yes	Tributary MFA output	Full MSA MFA	P15	Formal sector collection for dry recycling	MSW	t·y-1	P15_Formal sector collection for dry recycling	P15 = tP4i
	Process	Yes	Tributary MFA output	Full MSA MFA	P12ii	Incineration	MSW	t·y-1	P12ii_Incineration	P12ii = tP4iii
	Process	No		Full MSA MFA	P16	Uncontrolled disposal of MSW unburnt	MSW	t·y-1	P16_Uncontrolled disposal of MSW unburnt	P16 = P10 × (1-(C8/100))
	Process	No		Full MSA MFA	P17	Uncontrolled disposal of MSW openly burnt	MSW	t·y-1	P17_Uncontrolled disposal of MSW openly burnt	P17 = P10 × (C8/100)
	Process	No		Full MSA MFA	P18	Uncontrolled disposal of MSW unburnt and retained	MSW	t·y-1	P18_Uncontrolled disposal of MSW unburnt and retained	P18 = P16 × (1-(C9/100))
	Process	No		Full MSA MFA	P19	Disposal system MSW debris emissions	MSW	t·y-1	P19_Disposal system MSW debris emissions	P19 = P16 × (C9/100)
	Process	No		Full MSA MFA	P20	Uncollected MSW unburnt	MSW	t·y-1	P20_Uncollected MSW unburnt	P20 = P4 × (1-(C10/100))
	Process	No		Full MSA MFA	P21	Uncollected MSW openly burnt	MSW	t·y-1	P21_Uncollected MSW openly burnt	P21 = P4 × (C10/100)
	Transfer coefficient	No		Full MSA MFA	C1	Uncollected litter as % of generated MSW	MSW	% generated MSW	C1_Uncollected litter as % of generated MSW	C1 = LT × (1 - (S/100))
	Transfer coefficient	No		Full MSA MFA	C2	Collected MSW as % of generated MSW exc. uncollected litter	MSW	% generated MSW exc. uncollected litter	C2_Collected MSW as % of generated MSW exc. uncollected litter	C2 = (P5 / P3) × 100
	Input	Yes	Probability density function	Full MSA MFA	C3i	Debris emissions from collection system (prior to street sweeping) as % of collected MSW	MSw	% collected MSW	C3i_Debris emissions from collection system (prior to street sweeping) as % of collected MSW	NA
	Transfer coefficient	No		Full MSA MFA	C3	Debris emissions from collection system as % of collected MSW	MSW	% collected MSW	C3_Debris emissions from collection system as % of collected MSW	C3 = C3i × (1 - (S/100))
	Transfer coefficient	No		Full MSA MFA	C4	Collected MSW for recovery as % of collected & delivered MSW	MSW	% collected & delivered MSW	C4_Collected MSW for recovery as % of collected & delivered MSW	C4 = (P9 / P7) × 100
	Transfer coefficient	No		Full MSA MFA	C5	Controlled disposal of MSW as % of collected MSW for disposal	MSW	% collected MSW for disposal	C5_Controlled disposal of MSW as % of collected MSW for disposal	C5 = (P11 / P8) × 100
	Transfer coefficient	No		Full MSA MFA	C6i	Collected MSW for dry recycling as % of collected MSW for recovery	MSW	% collected MSW for recovery	C6i_Collected MSW for dry recycling as % of collected MSW for recovery	C6i = (P13 / P9) × 100
	Transfer coefficient	No		Full MSA MFA	C6ii	Composting and AD as % of collected MSW for recovery	MSW	% collected MSW for recovery	C6ii_Composting and AD as % of collected MSW for recovery	C6ii = (P12i / P9) × 100
	Transfer coefficient	No		Full MSA MFA	C6iii	Incineration as % of collected MSW for recovery	MSW	% collected MSW for recovery	C6iii_Incineration as % of collected MSW for recovery	C6iii = (P12ii/ P9) × 100
	Transfer coefficient	No		Full MSA MFA	C7	Collected MSW for dry recycling by formal sector as % of collected MSW for dry recycling	MSW	% collected MSW for dry recycling	C7_Collected MSW for dry recycling by formal sector as % of collected MSW for dry recycling	C7 = (P15 / P13) × 100
	Transfer coefficient	Yes	Probability density function	Full MSA MFA	C8	Open burning of uncontrolled disposal of MSW as % of uncontrolled disposal of MSW	MSW	% uncontrolled disposal MSW	C8_Open burning of uncontrolled disposal of MSW as % of uncontrolled disposal of MSW	NA
	Transfer coefficient	Yes	Probability density function	Full MSA MFA	C9	Debris emissions from uncontrolled disposal as a % of uncontrolled disposal of MSW unburnt	MSW	% uncontrolled disposal MSW unburnt	C9_Debris emissions from uncontrolled disposal as a % of uncontrolled disposal of MSW unburnt	NA
	Transfer coefficient	Yes	Probability density function	Full MSA MFA	C10	Uncollected MSW open burnt as % of uncollected MSW	MSW	% uncollected MSW	C10_Uncollected MSW open burnt as % of uncollected MSW	NA
	Input	Yes	Probability density function	Full MSA MFA	LT	Total litter as % of MSW generation	MSW	% of MSW generation	LT_Total litter as % of MSW generation	NA
	Input	Yes	Probability density function	Full MSA MFA	S	Street sweeping efficiency by income level and rurality	MSW	% of street litter collected	S_Street sweeping efficiency by income level and rurality	NA
	Mass balance check	No		Full MSA MFA	-	Mass balance for MSW MFA	MSW	t·y-1		P1 - (P2 + P20 + P21 + P6 + P18 + P19 + P17 + P11 + P12i + P12ii + P14 + P15) = 0
	Process	No		Full MSA MFA	P100	Mismanaged MSW	MSW	t·y-1	P100_Mismanaged MSW	P100 = P2 + P4 + P6 + P10
	Process	No		Plastics MFA	P2a	Uncollected plastic litter	Plastics	t·y-1	P2a_Uncollected plastic litter	P2a = P2 × (C11/100)
	Process	No		Plastics MFA	P2aa	Uncollected rigid plastic litter	Rigid plastics	t·y-1	P2aa_Uncollected rigid plastic litter	P2aa = P2a × (C11a/100)
	Process	No		Plastics MFA	P2ab	Uncollected flexible plastic litter	Flexible plastics	t·y-1	P2ab_Uncollected flexible plastic litter	P2ab = P2a × (1-(C11a/100))
	Process	No		Plastics MFA	P6a	Collection system plastic debris emissions	Plastics	t·y-1	P6a_Collection system plastic debris emissions	P6a = P6 × (C13/100)
	Process	No		Plastics MFA	P6aa	Collection system rigid plastic debris emissions	Rigid plastics	t·y-1	P6aa_Collection system rigid plastic debris emissions	P6aa = P6a × (C13a/100)
	Process	No		Plastics MFA	P6ab	Collection system flexible plastic debris emissions	Flexible plastics	t·y-1	P6ab_Collection system flexible plastic debris emissions	P6ab = P6a × (1-(C13a/100)))
	Process	No		Plastics MFA	P14a	Informal sector collection of plastic for dry recycling	Plastics	t·y-1	P14a_Informal sector collection of plastic for dry recycling	P14a = P14 × (C15/100)
	Process	No		Plastics MFA	P14aa	Informal sector collection of rigid plastic for dry recycling	Rigid plastics	t·y-1	P14aa_Informal sector collection of rigid plastic for dry recycling	P14aa = P14a × (C21a/100)
	Process	No		Plastics MFA	P14ab	Informal sector collection of flexible plastic for dry recycling	Flexible plastics	t·y-1	P14ab_Informal sector collection of flexible plastic for dry recycling	P14ab = P14a × (1-(C21a/100))
	Process	No		Plastics MFA	P15a	Formal sector collection of plastic for dry recycling	Plastics	t·y-1	P15a_Formal sector collection of plastic for dry recycling	P15a = P15 × (C16/100)
	Process	No		Plastics MFA	P15aa	Formal sector collection of rigid plastic for dry recycling	Rigid plastics	t·y-1	P15aa_Formal sector collection of rigid plastic for dry recycling	P15aa = P15a × (C22a/100)
	Process	No		Plastics MFA	P15ab	Formal sector collection of flexible plastic for dry recycling	Flexible plastics	t·y-1	P15ab_Formal sector collection of flexible plastic for dry recycling	P15ab = P15a × (1-(C22a/100))
	Process	No		Plastics MFA	P17a	Uncontrolled disposal of plastic openly burnt	Plastics	t·y-1	P17a_Uncontrolled disposal of plastic openly burnt	P17a = P17 × (C17/100)
	Process	No		Plastics MFA	P17aa	Uncontrolled disposal of rigid plastic openly burnt	Rigid plastics	t·y-1	P17aa_Uncontrolled disposal of rigid plastic openly burnt	P17aa = P17a × (C17a/100)
	Process	No		Plastics MFA	P17ab	Uncontrolled disposal of flexible plastic openly burnt	Flexible plastics	t·y-1	P17ab_Uncontrolled disposal of flexible plastic openly burnt	P17ab = P17a × (1-(C17a/100))
	Process	No		Plastics MFA	P19a	Disposal system plastic debris emissions	Plastics	t·y-1	P19a_Disposal system plastic debris emissions	P19a = P19 × (C14/100)
	Process	No		Plastics MFA	P19aa	Disposal system plastic rigid debris emissions	Rigid plastics	t·y-1	P19aa_Disposal system plastic rigid debris emissions	P19aa = P19a × (C14a/100)
	Process	No		Plastics MFA	P19ab	Disposal system plastic flexible debris emissions	Flexible plastics	t·y-1	P19ab_Disposal system plastic flexible debris emissions	P19ab = P19a × (1-(C14a/100))
	Process	No		Plastics MFA	P20a	Uncollected unburnt plastic	Plastics	t·y-1	P20a_Uncollected unburnt plastic	P20a = P20 × (C18/100)
	Process	No		Plastics MFA	P20aa	Uncollected unburnt rigid plastic	Rigid plastics	t·y-1	P20aa_Uncollected unburnt rigid plastic	P20aa = P20a × (C18a/100)
	Process	No		Plastics MFA	P20ab	Uncollected unburnt flexible plastic	Flexible plastics	t·y-1	P20ab_Uncollected unburnt flexible plastic	P20ab = P20a × (1-(C18a/100))
	Process	No		Plastics MFA	P21a	Uncollected plastic openly burnt	Plastics	t·y-1	P21a_Uncollected plastic openly burnt	P21a = P21 × (C12/100)
	Process	No		Plastics MFA	P21aa	Uncollected rigid plastic openly burnt	Rigid plastics	t·y-1	P21aa_Uncollected rigid plastic openly burnt	P21aa = P21a × (C12a/100)
	Process	No		Plastics MFA	P21ab	Uncollected flexible plastic openly burnt	Flexible plastics	t·y-1	P21ab_Uncollected flexible plastic openly burnt	P21ab = P21a × (1-(C12a/100))
	Process	No		Plastics MFA	P22aa	Sorting losses of rigid plastic from informal collection for dry recycling	Rigid plastics	t·y-1	P22aa_Sorting losses of rigid plastic from informal collection for dry recycling	P22aa = P14aa × (C23aa/100)
	Process	No		Plastics MFA	P22ab	Sorting losses of flexible plastic from informal collection for dry recycling	Flexible plastics	t·y-1	P22ab_Sorting losses of flexible plastic from informal collection for dry recycling	P22ab = P14ab × (C23ab/100)
	Process	No		Plastics MFA	P23aa	Sorted rigid plastic from informal collection for dry recycling	Rigid plastics	t·y-1	P23aa_Sorted rigid plastic from informal collection for dry recycling	P23aa = P14aa × (1-(C23aa/100))
	Process	No		Plastics MFA	P23ab	Sorted flexible plastic from informal collection for dry recycling	Flexible plastics	t·y-1	P23ab_Sorted flexible plastic from informal collection for dry recycling	P23ab = P14ab × (1-(C23ab/100))
	Process	No		Plastics MFA	P24aa	Sorting losses of rigid plastic from formal collection for dry recycling	Rigid plastics	t·y-1	P24aa_Sorting losses of rigid plastic from formal collection for dry recycling	P24aa = P15aa × (C24aa/100)
	Process	No		Plastics MFA	P24ab	Sorting losses of flexible plastic from formal collection for dry recycling	Flexible plastics	t·y-1	P24ab_Sorting losses of flexible plastic from formal collection for dry recycling	P24ab = P15ab × (C24ab/100)
	Process	No		Plastics MFA	P25aa	Sorted rigid plastic from formal collection for dry recycling	Rigid plastics	t·y-1	P25aa_Sorted rigid plastic from formal collection for dry recycling	P25aa = P15aa × (1-(C24aa/100))
	Process	No		Plastics MFA	P25ab	Sorted flexible plastic from formal collection for dry recycling	Flexible plastics	t·y-1	P25ab_Sorted flexible plastic from formal collection for dry recycling	P25ab = P15ab × (1-(C24ab/100)
	Process	No		Plastics MFA	P26aa	Mismanaged sorting losses of rigid plastic from informal collection for dry recycling	Rigid plastics	t·y-1	P26aa_Mismanaged sorting losses of rigid plastic from informal collection for dry recycling	P26aa = P22aa × (C25aa/100)
	Process	No		Plastics MFA	P26ab	Mismanaged sorting losses of flexible plastic from informal collection for dry recycling	Flexible plastics	t·y-1	P26ab_Mismanaged sorting losses of flexible plastic from informal collection for dry recycling	P26ab = P22ab × (C25ab/100)
	Process	No		Plastics MFA	P27aa	Managed sorting losses of rigid plastic from informal collection for dry recycling	Rigid plastics	t·y-1	P27aa_Managed sorting losses of rigid plastic from informal collection for dry recycling	P27aa = P22aa × (1-(C25aa/100))
	Process	No		Plastics MFA	P27ab	Managed sorting losses of flexible plastic from informal collection for dry recycling	Flexible plastics	t·y-1	P27ab_Managed sorting losses of flexible plastic from informal collection for dry recycling	P27ab = P22ab × (1-(C25ab/100))
	Process	No		Plastics MFA	P28aa	Mismanaged sorting losses of rigid plastic from formal collection for dry recycling	Rigid plastics	t·y-1	P28aa_Mismanaged sorting losses of rigid plastic from formal collection for dry recycling	P28aa = P24aa × (C26aa/100)
	Process	No		Plastics MFA	P28ab	Mismanaged sorting losses of flexible plastic from formal collection for dry recycling	Flexible plastics	t·y-1	P28ab_Mismanaged sorting losses of flexible plastic from formal collection for dry recycling	P28ab = P24ab × (C26ab/100)
	Process	No		Plastics MFA	P29aa	Managed sorting losses of rigid plastic from formal collection for dry recycling	Rigid plastics	t·y-1	P29aa_Managed sorting losses of rigid plastic from formal collection for dry recycling	P29aa = P24aa × (1-(C26aa/100))
	Process	No		Plastics MFA	P29ab	Managed sorting losses of flexible plastic from formal collection for dry recycling	Flexible plastics	t·y-1	P29ab_Managed sorting losses of flexible plastic from formal collection for dry recycling	P29ab = P24ab × (1-(C26ab/100))
	Process	No		Plastics MFA	P30aa	Informal sector mismanaged sorting losses of rigid plastic open burnt	Rigid plastics	t·y-1	P30aa_Informal sector mismanaged sorting losses of rigid plastic open burnt	P30aa = P26aa × (C27aa/100)
	Process	No		Plastics MFA	P30ab	Informal sector mismanaged sorting losses of flexible plastic open burnt	Flexible plastics	t·y-1	P30ab_Informal sector mismanaged sorting losses of flexible plastic open burnt	P30ab = P26ab × (C27ab/100)
	Process	No		Plastics MFA	P31aa	Informal sector mismanaged sorting losses of rigid plastic unburnt	Rigid plastics	t·y-1	P31aa_Informal sector mismanaged sorting losses of rigid plastic unburnt	P31aa = P26aa × (1-(C27aa/100))
	Process	No		Plastics MFA	P31ab	Informal sector mismanaged sorting losses of flexible plastic unburnt	Flexible plastics	t·y-1	P31ab_Informal sector mismanaged sorting losses of flexible plastic unburnt	P31ab = P26ab × (1-(C27ab/100))
	Process	No		Plastics MFA	P32aa	Formal sector mismanaged sorting losses of rigid plastic open burnt	Rigid plastics	t·y-1	P32aa_Formal sector mismanaged sorting losses of rigid plastic open burnt	P32aa = P28aa × (C28aa/100)
	Process	No		Plastics MFA	P32ab	Formal sector mismanaged sorting losses of flexible plastic open burnt	Flexible plastics	t·y-1	P32ab_Formal sector mismanaged sorting losses of flexible plastic open burnt	P32ab = P28ab × (C28ab/100)
	Process	No		Plastics MFA	P33aa	Formal sector mismanaged sorting losses of rigid plastic unburnt	Rigid plastics	t·y-1	P33aa_Formal sector mismanaged sorting losses of rigid plastic unburnt	P33aa = P28aa × (1-(C28aa/100))
	Process	No		Plastics MFA	P33ab	Formal sector mismanaged sorting losses of flexible plastic unburnt	Flexible plastics	t·y-1	P33ab_Formal sector mismanaged sorting losses of flexible plastic unburnt	P33ab = P28ab × (1-(C28ab/100))
	Transfer coefficient	Yes	Random forest output	Plastics MFA	C0	Plastic in MSW as % of MSW generation	Plastics	% MSW generation	C0_Plastic in MSW as % of MSW generation	NA
	Transfer coefficient	Yes	Probability density function	Plastics MFA	C0a	Rigid plastic in MSW as % of plastic generation	Plastics	% plastic generation	C0a_Rigid plastic in MSW as % of plastic generation	NA
	Transfer coefficient	Yes	Probability density function	Plastics MFA	C11	Plastic in litter as % of uncollected litter	Plastics	% uncollected litter	C11_Plastic in litter as % of uncollected litter	NA
	Transfer coefficient	No		Plastics MFA	C12	Uncollected plastic burnt as % of uncollected MSW burnt	Plastics	% uncollected MSW open burnt	C12_Uncollected plastic burnt as % of uncollected MSW burnt	C12 = C0
	Transfer coefficient	No		Plastics MFA	C13	Plastic in collection system debris emissions as % of collection system MSW debris emissions	Plastics	% collection system MSW debris emissions	C13_Plastic in collection system debris emissions as % of collection system MSW debris emissions	C13 = C0
	Transfer coefficient	Yes	Probability density function	Plastics MFA	C14	Disposal system plastic debris emissions as % of disposal system MSW debris emissions of MSW	Plastics	% disposal system MSW debris emissions	C14_Disposal system plastic debris emissions as % of disposal system MSW debris emissions of MSW	NA
	Transfer coefficient	Yes	Probability density function	Plastics MFA	C15	Plastic collected by informal sector as % of informal sector collection of MSW for dry recycling	Plastics	% MSW collected by informal sector	C15_Plastic collected by informal sector as % of informal sector collection of MSW for dry recycling	NA
	Transfer coefficient	Yes	Probability density function	Plastics MFA	C16	Plastic collected by formal sector as % of formal sector collection of MSW for dry recycling	Plastics	% MSW collected by formal sector	C16_Plastic collected by formal sector as % of formal sector collection of MSW for dry recycling	NA
	Transfer coefficient	No		Plastics MFA	C17	Plastic in uncontrolled disposal of MSW burnt as % of uncontrolled diposal of MSW burnt	Plastics	% uncontrolled disposal MSW burnt	C17_Plastic in uncontrolled disposal of MSW burnt as % of uncontrolled diposal of MSW burnt	C17 = C0
	Transfer coefficient	No		Plastics MFA	C18	Plastic in uncollected MSW unburnt as % of uncollected MSW unburnt	Plastics	% uncollected MSW unburnt	C18_Plastic in uncollected MSW unburnt as % of uncollected MSW unburnt	C18 = C0
	Transfer coefficient	Yes	Probability density function	Plastics MFA	C11a	Rigid plastic in uncollected litter as % of uncollected plastic litter	Rigid plastics	% uncollected plastic litter	C11a_Rigid plastic in uncollected litter as % of uncollected plastic litter	NA
	Transfer coefficient	No		Plastics MFA	C12a	Uncollected rigid plastic burnt as % uncollected plastics burnt	Rigid plastics	% uncollected plastic open burnt	C12a_Uncollected rigid plastic burnt as % uncollected plastics burnt	C12a = C0a
	Transfer coefficient	No		Plastics MFA	C13a	Rigid plastic collection system debris emissions as % of collection system plastic debris emissions	Rigid plastics	% collection system plastic debris emissions	C13a_Rigid plastic collection system debris emissions as % of collection system plastic debris emissions	C13a = C0a
	Transfer coefficient	Yes	Probability density function	Plastics MFA	C14a	Disposal system rigid plastic debris emissions as % disposal system plastic debris emissions	Rigid plastics	% disposal system plastic debris emissions	C14a_Disposal system rigid plastic debris emissions as % disposal system plastic debris emissions	NA
	Transfer coefficient	No		Plastics MFA	C17a	Rigid plastic in uncontrolled disposal of MSW burnt as % of uncontrolled diposal of plastic burnt	Rigid plastics	% uncollected and unburned plastic	C17a_Rigid plastic in uncontrolled disposal of MSW burnt as % of uncontrolled diposal of plastic burnt	C17a = C0a
	Transfer coefficient	No		Plastics MFA	C18a	Uncollected rigid plastic unburnt as % uncollected plastics unburnt	Rigid plastics	% uncollected and unburned plastic	C18a_Uncollected rigid plastic unburnt as % uncollected plastics unburnt	C18a = C0a
	Transfer coefficient	Yes	Probability density function	Plastics MFA	C21a	Rigid plastic in informal collection for recycling as % of informal sector collection of plastic for dry recycling	Rigid plastics	% informal sector collection plastic for dry recycling	C21a_Rigid plastic in informal collection for recycling as % of informal sector collection of plastic for dry recycling	NA
	Transfer coefficient	No		Plastics MFA	C22a	Rigid plastic in formal collection for recycling as % of formal sector collection of plastic for dry recycling	Rigid plastics	% formal sector collection plastic for dry recycling	C22a_Rigid plastic in formal collection for recycling as % of formal sector collection of plastic for dry recycling	C22a = C0a
	Transfer coefficient	Yes	Probability density function	Plastics MFA	C23aa	Informal sector sorting losses of rigid plastic as % of informal collection of rigid plastic for dry recycling	Rigid plastics	% informal collection rigid plastic for dry recycling	C23aa_Informal sector sorting losses of rigid plastic as % of informal collection of rigid plastic for dry recycling	NA
	Transfer coefficient	Yes	Probability density function	Plastics MFA	C23ab	Informal sector sorting losses of flexible plastic as % of informal collection of flexible plastic for dry recycling	Flexible plastics	% informal collection flexible plastic for dry recycling	C23ab_Informal sector sorting losses of flexible plastic as % of informal collection of flexible plastic for dry recycling	NA
	Transfer coefficient	Yes	Probability density function	Plastics MFA	C24aa	Formal sector sorting losses of rigid plastic as % of formal collection of rigid plastic for dry recycling	Rigid plastics	% formal collection rigid plastic for dry recycling	C24aa_Formal sector sorting losses of rigid plastic as % of formal collection of rigid plastic for dry recycling	NA
	Transfer coefficient	Yes	Probability density function	Plastics MFA	C24ab	Formal sector sorting losses of flexible plastic as % of formal collection of flexible plastic for dry recycling	Flexible plastics	% formal collection flexible plastic for dry recycling	C24ab_Formal sector sorting losses of flexible plastic as % of formal collection of flexible plastic for dry recycling	NA
	Transfer coefficient	No		Plastics MFA	C25aa	Informal mismanaged sorting losses of rigid plastic as % of sorting losses of rigid plastic from informal collection for dry recycling	Rigid plastics	% sorting losses rigid plastic from informal collection for dry recycling	C25aa_Informal mismanaged sorting losses of rigid plastic as % of sorting losses of rigid plastic from informal collection for dry recycling	C25aa = (100 - C2) × (1 - (S/100))
	Transfer coefficient	No		Plastics MFA	C25ab	Informal mismanaged sorting losses of flexible plastic as % of sorting losses of flexible plastic from informal collection for dry recycling	Flexible plastics	% sorting losses flexible plastic from informal collection for dry recycling	C25ab_Informal mismanaged sorting losses of flexible plastic as % of sorting losses of flexible plastic from informal collection for dry recycling	C25ab = (100 - C2) × (1 - (S/100))
	Transfer coefficient	No		Plastics MFA	C26aa	Formal mismanaged sorting losses of rigid plastic as % of sorting losses of rigid plastic from formal collection for dry recycling	Rigid plastics	% sorting losses rigid plastic from formal collection for dry recycling	C26aa_Formal mismanaged sorting losses of rigid plastic as % of sorting losses of rigid plastic from formal collection for dry recycling	C26aa = (100 - C2) × (1 - (S/100))
	Transfer coefficient	No		Plastics MFA	C26ab	Formal mismanaged sorting losses of flexible plastic as % of sorting losses of flexible plastic from formal collection for dry recycling	Flexible plastics	% sorting losses flexible plastic from formal collection for dry recycling	C26ab_Formal mismanaged sorting losses of flexible plastic as % of sorting losses of flexible plastic from formal collection for dry recycling	C26ab = (100 - C2) × (1 - (S/100))
	Transfer coefficient	No		Plastics MFA	C27aa	Informal mismanaged sorting losses of rigid plastic openly burnt as % of mismanaged sorting losses of rigid plastic from informal collection for dry recycling	Rigid plastics	% mismanaged sorting losses rigid plastic from informal collection for dry recycling	C27aa_Informal mismanaged sorting losses of rigid plastic openly burnt as % of mismanaged sorting losses of rigid plastic from informal collection for dry recycling	C27aa = C10
	Transfer coefficient	No		Plastics MFA	C27ab	Informal mismanaged sorting losses of flexible plastic openly burnt as % of mismanaged sorting losses of flexible plastic from informal collection for dry recycling	Flexible plastics	% mismanaged sorting losses flexible plastic from informal collection for dry recycling	C27ab_Informal mismanaged sorting losses of flexible plastic openly burnt as % of mismanaged sorting losses of flexible plastic from informal collection for dry recycling	C27ab = C10
	Transfer coefficient	No		Plastics MFA	C28aa	Formal mismanaged sorting losses of rigid plastic openly burnt as % of mismanaged sorting losses of rigid plastic from formal collection for dry recycling	Rigid plastics	% mismanaged sorting losses rigid plastic from formal collection for dry recycling	C28aa_Formal mismanaged sorting losses of rigid plastic openly burnt as % of mismanaged sorting losses of rigid plastic from formal collection for dry recycling	C28aa = C10
	Transfer coefficient	No		Plastics MFA	C28ab	Formal mismanaged sorting losses of flexible plastic openly burnt as % of mismanaged sorting losses of flexible plastic from formal collection for dry recycling	Flexible plastics	% mismanaged sorting losses flexible plastic from formal collection for dry recycling	C28ab_Formal mismanaged sorting losses of flexible plastic openly burnt as % of mismanaged sorting losses of flexible plastic from formal collection for dry recycling	C28ab = C10
	Mass balance check	No		Plastics MFA	-	Mass balance for Plastics MFA	Plastics	t·y-1		(P2a + P20a + P21a + P17a + P6a + P19a + P14a + P15a) - (P2aa + P2ab + P20aa + P20ab + P21aa + P21ab + P6aa + P6ab + P17aa + P17ab + P19aa + P19ab + P23aa + P23ab + P27aa + P27ab + P30aa + P31aa + P30ab + P31ab + P25aa + P25ab + P29aa + P29ab + P32aa + P33aa + P32ab + P33ab) = 0

## Sheet: 01a_Process_names_units
Process_ID	Process_short_name	Process_long_name	Unit
tP1	Generated_MSW_trib	MSW generated (tributary model)	t·y-1
tP2	Collected_MSW_trib	MSW collected (tributary model)	t·y-1
tP3	Disp_MSW_trib	MSW collected for diposal (tributary model)	t·y-1
tP4i	Dry_recy_form_trib	Dry recyclables collected by formal sector (tributary model)	t·y-1
tP4ii	Other_recv_trib	Other recovery of MSW (tributary model)	t·y-1
tP4iii	Incin_trib	Incineration (tributary model)	t·y-1
tP4	Treat_recover_trib	MSW collected for treatment or recovery (tributary model)	t·y-1
tP5	Controlled_disp_trib	Controlled disposal of MSW (tributary model)	t·y-1
tP8	Uncollected_trib	Uncollected MSW (tributary model)	t·y-1
tP9	Uncontrolled_disp_trib	Uncontrolled disposal of MSW (tributary model)	t·y-1
P1	Generated_MSW	MSW generated	t·y-1
P2	Litter	Uncollected litter	t·y-1
P3	Generated_MSW_exc_litter	Generated MSW excluding uncollected litter	t·y-1
P4	Uncollected_MSW	Uncollected MSW	t·y-1
P5	Collected_MSW	Collected MSW	t·y-1
P6	Col_emissions	Collection system debris emissions	t·y-1
P7	Col_deliver	Collected and delivered MSW	t·y-1
P8	Disp_MSW	Collected MSW for disposal	t·y-1
P9	Treat_recover_MSW	Collected MSW for treatment or recovery	t·y-1
P10	Uncontrolled_disp	Uncontrolled disposal of MSW	t·y-1
P11	Controlled_disp	Controlled disposal of MSW	t·y-1
P12i	Other_treat_MSW	Other treatement of MSW (composting, AD)	t·y-1
P12ii	Incin	Incineration	t·y-1
P13	Dry_recy	Collected for dry recycling	t·y-1
P14	Dry_recy_inf	Informal sector collection for dry recycling	t·y-1
P15	Dry_recy_form_trib	Formal sector collection for dry recycling	t·y-1
P16	Disp_uncontrolled_unburnt	Uncontrolled disposal of MSW unburnt	t·y-1
P17	Disp_uncontrolled_burnt	Uncontrolled disposal of MSW openly burnt	t·y-1
P18	Disp_uncontrolled_unburnt_retained	Uncontrolled disposal of MSW unburnt and retained	t·y-1
P19	Disp_emissions	Disposal system MSW debris emissions	t·y-1
P20	Uncol_unburnt	Uncollected MSW unburnt	t·y-1
P21	Uncol_burnt	Uncollected MSW openly burnt	t·y-1
P100	Misman	Mismanaged MSW	t·y-1
P2a	Litter_plastic	Uncollected plastic litter	t·y-1
P2aa	Litter_rigid	Uncollected rigid plastic litter	t·y-1
P2ab	Litter_flex	Uncollected flexible plastic litter	t·y-1
P6a	Col_emissions_plastic	Collection system plastic debris emissions	t·y-1
P6aa	Col_emissions_rigid	Collection system rigid plastic debris emissions	t·y-1
P6ab	Col_emissions_flex	Collection system flexible plastic debris emissions	t·y-1
P14a	Dry_recy_inf_plastic	Informal sector collection of plastic for dry recycling	t·y-1
P14aa	Dry_recy_inf_rigid	Informal sector collection of rigid plastic for dry recycling	t·y-1
P14ab	Dry_recy_inf_flex	Informal sector collection of flexible plastic for dry recycling	t·y-1
P15a	Dry_recy_form_plastic	Formal sector collection of plastic for dry recycling	t·y-1
P15aa	Dry_recy_form_rigid	Formal sector collection of rigid plastic for dry recycling	t·y-1
P15ab	Dry_recy_form_flex	Formal sector collection of flexible plastic for dry recycling	t·y-1
P17a	Disp_uncontrolled_burnt_plastic	Uncontrolled disposal of plastic openly burnt	t·y-1
P17aa	Disp_uncontrolled_burnt_rigid	Uncontrolled disposal of rigid plastic openly burnt	t·y-1
P17ab	Disp_uncontrolled_burnt_flex	Uncontrolled disposal of flexible plastic openly burnt	t·y-1
P19a	Disp_emissions_plastic	Disposal system plastic debris emissions	t·y-1
P19aa	Disp_emissions_rigid	Disposal system plastic rigid debris emissions	t·y-1
P19ab	Disp_emissions_flex	Disposal system plastic flexible debris emissions	t·y-1
P20a	Uncol_unburnt_plastic	Uncollected unburnt plastic	t·y-1
P20aa	Uncol_unburnt_rigid	Uncollected unburnt rigid plastic	t·y-1
P20ab	Uncol_unburnt_flex	Uncollected unburnt flexible plastic	t·y-1
P21a	Uncol_burnt_plastic	Uncollected plastic openly burnt	t·y-1
P21aa	Uncol_burnt_rigid	Uncollected rigid plastic openly burnt	t·y-1
P21ab	Uncol_burnt_flex	Uncollected flexible plastic openly burnt	t·y-1
P22aa	Dry_recy_inf_loss_rigid	Sorting losses of rigid plastic from informal collection for dry recycling	t·y-1
P22ab	Dry_recy_inf_loss_flex	Sorting losses of flexible plastic from informal collection for dry recycling	t·y-1
P23aa	Dry_recy_inf_sorted_rigid	Sorted rigid plastic from informal collection for dry recycling	t·y-1
P23ab	Dry_recy_inf_sorted_flex	Sorted flexible plastic from informal collection for dry recycling	t·y-1
P24aa	Dry_recy_form_loss_rigid	Sorting losses of rigid plastic from formal collection for dry recycling	t·y-1
P24ab	Dry_recy_form_loss_flex	Sorting losses of flexible plastic from formal collection for dry recycling	t·y-1
P25aa	Dry_recy_form_sorted_rigid	Sorted rigid plastic from formal collection for dry recycling	t·y-1
P25ab	Dry_recy_form_sorted_flex	Sorted flexible plastic from formal collection for dry recycling	t·y-1
P26aa	Dry_recy_inf_loss_mis_rigid	Mismanaged sorting losses of rigid plastic from informal collection for dry recycling	t·y-1
P26ab	Dry_recy_inf_loss_mis_flex	Mismanaged sorting losses of flexible plastic from informal collection for dry recycling	t·y-1
P27aa	Dry_recy_inf_loss_man_rigid	Managed sorting losses of rigid plastic from informal collection for dry recycling	t·y-1
P27ab	Dry_recy_inf_loss_man_flex	Managed sorting losses of flexible plastic from informal collection for dry recycling	t·y-1
P28aa	Dry_recy_form_loss_mis_rigid	Mismanaged sorting losses of rigid plastic from formal collection for dry recycling	t·y-1
P28ab	Dry_recy_form_loss_mis_flex	Mismanaged sorting losses of flexible plastic from formal collection for dry recycling	t·y-1
P29aa	Dry_recy_form_loss_man_rigid	Managed sorting losses of rigid plastic from formal collection for dry recycling	t·y-1
P29ab	Dry_recy_form_loss_man_flex	Managed sorting losses of flexible plastic from formal collection for dry recycling	t·y-1
P30aa	Dry_recy_inf_loss_mis_burnt_rigid	Informal sector mismanaged sorting losses of rigid plastic open burnt	t·y-1
P30ab	Dry_recy_inf_loss_mis_burnt_flex	Informal sector mismanaged sorting losses of flexible plastic open burnt	t·y-1
P31aa	Dry_recy_inf_loss_mis_unburnt_rigid	Informal sector mismanaged sorting losses of rigid plastic unburnt	t·y-1
P31ab	Dry_recy_inf_loss_mis_unburnt_flex	Informal sector mismanaged sorting losses of flexible plastic unburnt	t·y-1
P32aa	Dry_recy_form_loss_mis_burnt_rigid	Formal sector mismanaged sorting losses of rigid plastic open burnt	t·y-1
P32ab	Dry_recy_form_loss_mis_burnt_flex	Formal sector mismanaged sorting losses of flexible plastic open burnt	t·y-1
P33aa	Dry_recy_form_loss_mis_unburnt_rigid	Formal sector mismanaged sorting losses of rigid plastic unburnt	t·y-1
P33ab	Dry_recy_form_loss_mis_unburnt_flex	Formal sector mismanaged sorting losses of flexible plastic unburnt	t·y-1

## Sheet: 01b_Coefficient_names_units
Coeff_ID	Coeff_short_name	Coeff_long_name
C0	Plastic_MSW	Plastic in MSW as % of MSW generation
C0a	Rigid_plastic	Rigid plastic in MSW as % of plastic generation
C1	Uncol_litter_pct	Uncollected litter as % of generated MSW
C2	MSW_col_pct	Collected MSW as % of generated MSW exc. uncollected litter
C3	Col_sys_deb_em_pct	Debris emissions from collection system as % of collected MSW
C4	MSW_recv_pct	Collected MSW for recovery as % of collected & delivered MSW
C5	Cont_disp_pct	Controlled disposal of MSW as % of collected MSW for disposal
C6i	MSW_recy_pct	Collected MSW for dry recycling as % of collected MSW for recovery
C6ii	Comp_pct	Composting and AD as % of collected MSW for recovery
C6iii	Incin_pct	Incineration as % of collected MSW for recovery
C7	Form_dry_recy_pct	Collected MSW for dry recycling by formal sector as % of collected MSW for dry recycling
C8	Disp_open_burn_pct	Open burning of uncontrolled disposal of MSW as % of uncontrolled disposal of MSW
C9	Disp_debris_em_pct	Debris emissions from uncontrolled disposal as a % of uncontrolled disposal of MSW unburnt
C10	Uncol_burnt_pct	Uncollected MSW open burnt as % of uncollected MSW
C11	Uncol_litter_plas_pct	Plastic in litter as % of uncollected litter
C12	Uncol_burnt_plas_pct	Uncollected plastic burnt as % of uncollected MSW burnt
C13	Col_sys_deb_em_plas_pct	Plastic in collection system debris emissions as % of collection system MSW debris emissions
C14	Disp_debris_em_plas_pct	Disposal system plastic debris emissions as % of disposal system MSW debris emissions of MSW
C15	Inf_plas_col_pct	Plastic collected by informal sector as % of informal sector collection of MSW for dry recycling
C16	Form_plas_col_pct	Plastic collected by formal sector as % of formal sector collection of MSW for dry recycling
C17	Uncon_disp_burnt_plas_pct	Plastic in uncontrolled disposal of MSW burnt as % of uncontrolled diposal of MSW burnt
C18	Uncol_unburnt_plas_pct	Plastic in uncollected MSW unburnt as % of uncollected MSW unburnt
C11a	Uncol_litter_plas_rig_pct	Rigid plastic in uncollected litter as % of uncollected plastic litter
C12a	Uncol_burnt_plas_rig_pct	Uncollected rigid plastic burnt as % uncollected plastics burnt
C13a	Col_sys_deb_em_plas_rig_pct	Rigid plastic collection system debris emissions as % of collection system plastic debris emissions
C14a	Disp_debris_em_plas_rig_pct	Disposal system rigid plastic debris emissions as % disposal system plastic debris emissions
C17a	Uncon_disp_burnt_plas_rig_pct	Rigid plastic in uncontrolled disposal of MSW burnt as % of uncontrolled diposal of plastic burnt
C18a	Uncol_unburnt_plas_rig_pct	Uncollected rigid plastic unburnt as % uncollected plastics unburnt
C21a	Inf_plas_rig_col_pct	Rigid plastic in informal collection for recycling as % of informal sector collection of plastic for dry recycling
C22a	Form_plas_rig_col_pct	Rigid plastic in formal collection for recycling as % of formal sector collection of plastic for dry recycling
C23aa	Inf_rig_sort_loss_pct	Informal sector sorting losses of rigid plastic as % of informal collection of rigid plastic for dry recycling
C23ab	Inf_flex_sort_loss_pct	Informal sector sorting losses of flexible plastic as % of informal collection of flexible plastic for dry recycling
C24aa	Form_rig_sort_loss_pct	Formal sector sorting losses of rigid plastic as % of formal collection of rigid plastic for dry recycling
C24ab	Form_flex_sort_loss_pct	Formal sector sorting losses of flexible plastic as % of formal collection of flexible plastic for dry recycling
C25aa	Inf_rig_mis_sort_loss_pct	Informal mismanaged sorting losses of rigid plastic as % of sorting losses of rigid plastic from informal collection for dry recycling
C25ab	Inf_flex_mis_sort_loss_pct	Informal mismanaged sorting losses of flexible plastic as % of sorting losses of flexible plastic from informal collection for dry recycling
C26aa	Form_rig_mis_sort_loss_pct	Formal mismanaged sorting losses of rigid plastic as % of sorting losses of rigid plastic from formal collection for dry recycling
C26ab	Form_flex_mis_sort_loss_pct	Formal mismanaged sorting losses of flexible plastic as % of sorting losses of flexible plastic from formal collection for dry recycling
C27aa	Inf_rig_mis_sort_loss_burnt_pct	Informal mismanaged sorting losses of rigid plastic openly burnt as % of mismanaged sorting losses of rigid plastic from informal collection for dry recycling
C27ab	Inf_flex_mis_sort_loss_burnt_pct	Informal mismanaged sorting losses of flexible plastic openly burnt as % of mismanaged sorting losses of flexible plastic from informal collection for dry recycling
C28aa	Form_rig_mis_sort_loss_burnt_pct	Formal mismanaged sorting losses of rigid plastic openly burnt as % of mismanaged sorting losses of rigid plastic from formal collection for dry recycling
C28ab	Form_flex_mis_sort_loss_burnt_pct	Formal mismanaged sorting losses of flexible plastic openly burnt as % of mismanaged sorting losses of flexible plastic from formal collection for dry recycling

## Sheet: 01c_Output_names_units
Output_ID	Output_short_name	Output_long_name	Unit
wg	Waste_gen	MSW generation	t·y-1
wg_per_cap	Waste_gen_per_cap	MSW generation rate	kg·cap-1·d-1
pwg	Plastic_waste_gen	Plastic waste generation	t·y-1
pwg_per_cap	Plastic_waste_gen_rate_per_cap	Plastic waste generation rate	kg·cap-1·d-1
col_cov_pct_gen_exc_lit	Collection_coverage_pct_gen_exc_litter	MSW collection coverage (service coverage) as percent of generation excluding uncollected litter	% MSW generation exc. uncollected litter
col_del_pct_gen	Collection_delivered_pct_gen	MSW collected and delivered as percent of total waste generation	% MSW generation
litter_em_pct_gen	Litter_pct_gen	Litter as percentage of MSW generation	% MSW generation
uncol_em_pct_gen	Uncollected_waste_pct_gen	Uncollected waste as a percentage of MSW generation	% MSW generation
collection_em_pct_gen	Collection_emissions_pct_gen	Collection system emissions as a percentage of MSW generation	% MSW generation
cont_disp_pct_gen	Controlled_disp_pct_gen	Controlled disposal of MSW as percentage of MSW generation	% MSW generation
uncont_disp_pct_gen	Uncontrolled_disp_pct_gen	Uncontrolled disposal of MSW as percentage of MSW generation	% MSW generation
compost_pct_gen	Composting_pct_gen	MSW collection for composting or AD as percentage of MSW generation	% MSW generation
incin_pct_gen	Incineration_pct_gen	MSW collection for incineration as percentage of MSW generation	% MSW generation
recy_pct_gen	Recycling_pct_gen	MSW collection for dry recycling as percentage of MSW generation	% MSW generation
recy_form_pct_recy	Recycling_formal_pct_recy	MSW formal collection for dry recycling as percentage of collection for recycling	% collected for recycling
recy_inform_pct_recy	Recycling_informal_pct_recy	MSW informal collection for dry recycling as percentage of collection for recycling	% collected for recycling
cont_disp_pct_disp	Controlled_disp_pct_disp	Controlled disposal of MSW as percentage of MSW disposed	% MSW disposed
uncont_disp_pct_disp	Uncontrolled_disp_pct_disp	Uncontrolled disposal of MSW as percentage of MSW disposed	% MSW disposed
man_cont_pct_gen	Managed_controlled_facilities_pct_gen	MSW managed in controlled facilities (SDG11.6.1)	% MSW generation
open_burn_MSW	Openly_burned_MSW	MSW openly burned (includes burning of plastic sorting rejects)	t·y-1
open_burn_MSW_pct_gen	Openly_burned_MSW_pct_gen	MSW openly burned as pct of gen (includes burning of plastic sorting rejects)	% of MSW generation
plas_debris_em	Plastic_debris_emissions	Plastic debris emissions	t·y-1
plas_burn_em	Plastic_openly_burned	Openly burned plastic emissions	t·y-1
plas_em	Plastic_emissions	Plastic emissions (debris + openly burned)	t·y-1
plas_debris_em_pct_em	Plastic_debris_emissions_pct_emissions	Plastic debris emissions as percentage of plastic emissions	% plastic emissions
plas_burn_em_pct_em	Openly_burnt_plastic_pct_emissions	Openly burnt plastic emissions as percentage of plastic emissions	% plastic emissions
plas_debris_em_per_cap	Plastic_debris_emissions_per_cap	Per capita plastic debris emissions	kg·cap-1·y-1
plas_burn_em_per_cap	Plastic_openly_burned_emissions_per_cap	Per capita openly burned plastic	kg·cap-1·y-1
plas_em_per_cap	Plastic_emissions_per_cap	Per capita plastic emissions (debris + openly burned)	kg·cap-1·y-1
rigid_plas_deb_em	Rigid_plastic_debris_emissions	Rigid plastic debris emissions	t·y-1
flex_plas_deb_em	Flex_plastic_debris_emissions	Flexible plastic debris emissions	t·y-1
rigid_plas_ob_em	Rigid_plastic_openly_burned_emissions	Rigid plastic openly burned emissions	t·y-1
flex_plas_ob_em	Flex_plastic_openly_burned_emissions	Flexible plastic openly burned emissions	t·y-1
rigid_plas_deb_em_pct_em	Rigid_plastic_debris_emissions_pct_em	Rigid plastic debris emissions as percentage of plastic emissions	% plastic emissions
flex_plas_deb_em_pct_em	Flex_plastic_debris_emissions_pct_em	Flexible plastic debris emissions as percentage of plastic emissions	% plastic emissions
rigid_plas_ob_em_pct_em	Rigid_plastic_openly_burned_emissions_pct_em	Rigid plastic openly burned emissions as percentage of plastic emissions	% plastic emissions
flex_plas_ob_em_pct_em	Flex_plastic_openly_burned_emissions_pct_em	Flexible plastic openly burned emissions as percentage of plastic emissions	% plastic emissions
plas_litter_em	Plastic_litter_em	Plastic emissions from litter	t·y-1
plas_uncol_em	Plastic_uncol_waste_em	Plastic emissions from uncollected waste	t·y-1
plas_collection_em	Plastic_collection_system_em	Plastic collection system emissions	t·y-1
plas_disp_em	Plastic_disposal_system_em	Plastic disposal system emissions	t·y-1
plas_recy_em	Plastic_recycling_system_em	Plastic recycling system emissions	t·y-1
plas_litter_em_pct_em	Plastic_litter_em_pct_em	Plastic emissions from litter as a percentage of plastic emissions	% plastic emissions
plas_uncol_em_pct_em	Plastic_uncol_waste_em_pct_em	Plastic emissions from uncollected waste as a percentage of plastic emissions	% plastic emissions
plas_collection_em_pct_em	Plastic_collection_system_em_pct_em	Plastic collection system emissions as a percentage of plastic emissions	% plastic emissions
plas_disp_em_pct_em	Plastic_disposal_system_em_pct_em	Plastic disposal system emissions as a percentage of plastic emissions	% plastic emissions
plas_recy_em_pct_em	Plastic_recycling_system_em_pct_em	Plastic recycling system emissions as a percentage of plastic emissions	% plastic emissions
plas_litter_deb_em_pct_em	Plastic_litter_debris_em_pct_em	Debris plastic emissions from litter as a percentage of plastic emissions	% plastic emissions
plas_uncol_deb_em_pct_em	Plastic_uncol_waste_debris_em_pct_em	Debris plastic emissions from uncollected waste as a percentage of plastic emissions	% plastic emissions
plas_uncol_ob_em_pct_em	Plastic_uncol_waste_burn_em_pct_em	Openly burned plastic emissions from uncollected waste as a percentage of plastic emissions	% plastic emissions
plas_collection_deb_em_pct_em	Plastic_collection_system_debris_em_pct_em	Debris plastic collection system emissions as a percentage of plastic emissions	% plastic emissions
plas_disp_deb_em_pct_em	Plastic_disposal_system_debris_em_pct_em	Debris plastic emissions from disposal system as a percentage of plastic emissions	% plastic emissions
plas_disp_ob_em_pct_em	Plastic_disposal_system_burn_em_pct_em	Openly burned plastic emissions from disposal system as a percentage of plastic emissions	% plastic emissions
plas_inf_deb_em_pct_em	Plastic_informal_recycling_system_debris_em_pct_em	Debris plastic emissions from informal recycling system emissions as a percentage of plastic emissions	% plastic emissions
plas_inf_ob_em_pct_em	Plastic_informal_recycling_system_burn_em_pct_em	Openly burned plastic emissions from informal recycling system emissions as a percentage of plastic emissions	% plastic emissions
plas_form_deb_em_pct_em	Plastic_formal_recycling_system_debris_em_pct_em	Debris plastic emissions from formal recycling system emissions as a percentage of plastic emissions	% plastic emissions
plas_form_ob_em_pct_em	Plastic_formal_recycling_system_burn_em_pct_em	Openly burned plastic emissions from formal recycling system emissions as a percentage of plastic emissions	% plastic emissions
people_no_col	People_without_collection	People without MSW collection	People
people_no_col_pct_pop	People_without_collection_pct	Percent of population without MSW collection	% population
