# Supplementary material for: A local-to-global emissions inventory of macroplastic pollution
Source: Research Square preprint supplement (doi:10.21203/rs.3.rs-3376960/v1), 2023-10-23
Supplement: Supplementary file 2 [file 371d1e42c20601e50122b3fd.xlsx]

## Sheet: 00_Info
	Supplementary material for	A local-to-global emissions inventory of macroplastic pollution
	Software	Spatio-temporal plastic pollution origins and transport model (SPOT)
	Software version number	V1.0.0-G-092023
	Release date	2023-09-21
	Dataset name	ST_03_SPOT_MFA_Outputs_National.xls
	Authors	DBPR
	Correspondence	DBPR
	Correspondence to	DBPR
	Dataset description	Data predicted by probabilistic MFA at municipal level are aggregated to national level. Basic statistics (min, max, mean, median, upper & lower quartiles) presented.
	Contents
	01_Processes	Process mass by country.
	01a_Processes_legend	Naming convention and units for processes.
	02_Coefficients	Coefficients are calculated from process mass.
	02a_Coefficients_legend	Naming convention and units for Coefficients.
	03_Outputs	Summary outputs derived from process mass.
	03a_Outputs_legend	Naming convention and units for Outputs.

## Sheet: 01_Processes
									Process short name:	Generated_MSW_trib	Collected_MSW_trib	Disp_MSW_trib	Dry_recy_form_trib	Other_recv_trib	Incin_trib	Treat_recover_trib	Controlled_disp_trib	Uncollected_trib	Uncontrolled_disp_trib	Generated_MSW	Litter	Generated_MSW_exc_litter	Uncollected_MSW	Collected_MSW	Col_emissions	Col_deliver	Disp_MSW	Treat_recover_MSW	Uncontrolled_disp	Controlled_disp	Other_treat_MSW	Incin	Dry_recy	Dry_recy_inf	Dry_recy_form_trib	Disp_uncontrolled_unburnt	Disp_uncontrolled_burnt	Disp_uncontrolled_unburnt_retained	Disp_emissions	Uncol_unburnt	Uncol_burnt	Misman	Litter_plastic	Litter_rigid	Litter_flex	Col_emissions_plastic	Col_emissions_rigid	Col_emissions_flex	Dry_recy_inf_plastic
									Units:	t·y-1	t·y-1	t·y-1	t·y-1	t·y-1	t·y-1	t·y-1	t·y-1	t·y-1	t·y-1	t·y-1	t·y-1	t·y-1	t·y-1	t·y-1	t·y-1	t·y-1	t·y-1	t·y-1	t·y-1	t·y-1	t·y-1	t·y-1	t·y-1	t·y-1	t·y-1	t·y-1	t·y-1	t·y-1	t·y-1	t·y-1	t·y-1	t·y-1	t·y-1	t·y-1	t·y-1	t·y-1	t·y-1	t·y-1	t·y-1
Statistic	Country	ISO3	Income_cat	Region	Subregion	Intermediate_region	OECD_region	Population_2020	Rural_share	tP1	tP2	tP3	tP4i	tP4ii	tP4iii	tP4	tP5	tP8	tP9	P1	P2	P3	P4	P5	P6	P7	P8	P9	P10	P11	P12i	P12ii	P13	P14	P15	P16	P17	P18	P19	P20	P21	P100	P2a	P2aa	P2ab	P6a	P6aa	P6ab	P14a
Mean	Aruba	ABW	HIC	Americas	Latin America and the Caribbean	Caribbean	Latin America	106477	0.0421952	62709.9	62333.8	57068.8	5265.02	0	0	5265.02	57068.8	376.094	0	62832.8	28.6652	62804.1	376.094	62428	35.958	62392.1	57068.8	5323.26	0	57068.8	0	0	5323.26	58.2414	5265.02	0	0	0	0	248.74	127.354	440.717	5.02736	3.65914	1.36822	5.40943	3.33735	2.07208	1.34948
Min	Aruba	ABW	HIC	Americas	Latin America and the Caribbean	Caribbean	Latin America	106477	0.0421952	13213.8	13213.8	12796.1	0	0	0	0	12796.1	0	0	13283.3	4.65606	13273.8	0	13273.8	2.70294	13259.9	12796.1	17.5318	0	12796.1	0	0	17.5318	17.3443	0	0	0	0	0	0	0	8.36807	0.74166	0.540837	0.200822	0.133287	0.0829835	0.0355772	0.037604
Lower quartile	Aruba	ABW	HIC	Americas	Latin America and the Caribbean	Caribbean	Latin America	106477	0.0421952	42361.8	42155.2	38086.8	0	0	0	0	38086.8	0	0	42487.9	17.8236	42471.4	0	42249	18.4751	42212.7	38086.8	77.2199	0	38086.8	0	0	77.2199	38.3998	0	0	0	0	0	0	0	44.4803	3.09008	2.25915	0.836734	2.41809	1.45619	0.882707	0.743056
Median	Aruba	ABW	HIC	Americas	Latin America and the Caribbean	Caribbean	Latin America	106477	0.0421952	59850.6	59462	53803.5	1263.08	0	0	1263.08	53803.5	0	0	59960.8	26.1677	59932.9	0	59560.7	29.9211	59520.6	53803.5	1332.75	0	53803.5	0	0	1332.75	58.2067	1263.08	0	0	0	0	0	0	75.6256	4.57651	3.32853	1.24386	4.19173	2.5682	1.56288	1.21098
Upper quartile	Aruba	ABW	HIC	Americas	Latin America and the Caribbean	Caribbean	Latin America	106477	0.0421952	83169	83032.5	75396.2	8249.11	0	0	8249.11	75396.2	592.55	0	83354.7	36.7242	83317.9	592.55	83083.5	47.0155	83067.5	75396.2	8314.39	0	75396.2	0	0	8314.39	78.2196	8249.11	0	0	0	0	329.96	59.6827	623.911	6.3939	4.65664	1.75034	7.10678	4.3421	2.7178	1.81579
Max	Aruba	ABW	HIC	Americas	Latin America and the Caribbean	Caribbean	Latin America	106477	0.0421952	124754	123588	121644	41833.2	0	0	41833.2	121644	5615.85	0	124943	100.924	124905	5615.85	123772	219.01	123676	121644	41865.2	0	121644	0	0	41865.2	105.211	41833.2	0	0	0	0	4282.41	3489.23	5705.97	18.1413	13.1366	5.27355	35.0021	24.0225	15.0896	4.41685
Mean	Afghanistan	AFG	LIC	Asia	Southern Asia	NA	Other non-OECD Asia	3.89723e+07	0.156545	8.22276e+06	4.80867e+06	4.80867e+06	0	0	0	0	0	3.41409e+06	4.80867e+06	9.03672e+06	126520	8.9102e+06	3.41409e+06	5.49611e+06	128010	5.3681e+06	4.80867e+06	559426	4.80867e+06	0	0	0	559426	559426	0	3.89023e+06	918443	3.88624e+06	3991.95	2.32074e+06	1.09335e+06	8.47729e+06	22138.1	16113.9	6024.22	12334	5158.27	7175.7	169896
Min	Afghanistan	AFG	LIC	Asia	Southern Asia	NA	Other non-OECD Asia	3.89723e+07	0.156545	6.96671e+06	3.80798e+06	3.80798e+06	0	0	0	0	0	2.72723e+06	3.80798e+06	7.7526e+06	104642	7.64795e+06	2.72723e+06	4.44306e+06	100554	4.34067e+06	3.80798e+06	451991	3.80798e+06	0	0	0	451991	451991	0	3.02313e+06	606098	3.01987e+06	2708.12	1.84668e+06	816762	7.18249e+06	18293.6	13346.8	4946.85	9209.04	3686.23	5202	132747
Lower quartile	Afghanistan	AFG	LIC	Asia	Southern Asia	NA	Other non-OECD Asia	3.89723e+07	0.156545	7.96992e+06	4.59853e+06	4.59853e+06	0	0	0	0	0	3.27554e+06	4.59853e+06	8.7715e+06	122360	8.6487e+06	3.27554e+06	5.28107e+06	120300	5.15725e+06	4.59853e+06	531142	4.59853e+06	0	0	0	531142	531142	0	3.70135e+06	832047	3.69746e+06	3627.75	2.22216e+06	1.02936e+06	8.21892e+06	21422.8	15594.7	5828.27	11471.3	4773.35	6650.02	159187
Median	Afghanistan	AFG	LIC	Asia	Southern Asia	NA	Other non-OECD Asia	3.89723e+07	0.156545	8.23056e+06	4.80956e+06	4.80956e+06	0	0	0	0	0	3.40738e+06	4.80956e+06	9.04332e+06	126545	8.91673e+06	3.40738e+06	5.4965e+06	126888	5.36888e+06	4.80956e+06	556204	4.80956e+06	0	0	0	556204	556204	0	3.88313e+06	903351	3.87915e+06	3926.51	2.31537e+06	1.08927e+06	8.48458e+06	22117.6	16102.6	6018.81	12225	5097.36	7099.2	168204
Upper quartile	Afghanistan	AFG	LIC	Asia	Southern Asia	NA	Other non-OECD Asia	3.89723e+07	0.156545	8.48469e+06	5.01725e+06	5.01725e+06	0	0	0	0	0	3.54805e+06	5.01725e+06	9.3087e+06	130407	9.17756e+06	3.54805e+06	5.71261e+06	134501	5.57816e+06	5.01725e+06	585652	5.01725e+06	0	0	0	585652	585652	0	4.07406e+06	983985	4.06989e+06	4279.2	2.41614e+06	1.15336e+06	8.74589e+06	22837.6	16621.3	6215.23	13083.7	5477.4	7627.92	178743
Max	Afghanistan	AFG	LIC	Asia	Southern Asia	NA	Other non-OECD Asia	3.89723e+07	0.156545	9.35608e+06	6.08645e+06	6.08645e+06	0	0	0	0	0	4.23262e+06	6.08645e+06	1.01713e+07	147634	1.00417e+07	4.23262e+06	6.81204e+06	183326	6.65681e+06	6.08645e+06	714396	6.08645e+06	0	0	0	714396	714396	0	5.14551e+06	1.50393e+06	5.14125e+06	6781.4	2.95642e+06	1.42662e+06	9.63807e+06	25737.7	18742.9	7005.19	19003.3	7775.6	11506.5	242345
Mean	Angola	AGO	UMC	Africa	Sub-Saharan Africa	Middle Africa	Other Africa	3.33828e+07	0.248245	8.28955e+06	4.12409e+06	4.12408e+06	0	2.62227	0	2.62227	0	4.16547e+06	4.12408e+06	9.25972e+06	43178.7	9.21654e+06	4.16547e+06	5.05107e+06	28929.4	5.02214e+06	4.12408e+06	898060	4.12408e+06	0	2.62227	0	898057	898057	0	3.33796e+06	786128	3.33449e+06	3463.95	1.4503e+06	2.71516e+06	8.36166e+06	7556.09	5499.69	2056.4	3077.11	1365.68	1711.43	273421
Min	Angola	AGO	UMC	Africa	Sub-Saharan Africa	Middle Africa	Other Africa	3.33828e+07	0.248245	6.65509e+06	1.74206e+06	1.74206e+06	0	0	0	0	0	1.97466e+06	1.74206e+06	7.4312e+06	26199.5	7.39628e+06	1.97466e+06	2.41726e+06	15185.7	2.39902e+06	1.74206e+06	377373	1.74206e+06	0	0	0	377373	377373	0	1.22563e+06	254608	1.22415e+06	1028.26	583862	1.37025e+06	6.71706e+06	4504.96	3290.82	1214.14	1329.34	551.927	763.499	96670.4
Lower quartile	Angola	AGO	UMC	Africa	Sub-Saharan Africa	Middle Africa	Other Africa	3.33828e+07	0.248245	7.92961e+06	3.57272e+06	3.57272e+06	0	0	0	0	0	3.59479e+06	3.57272e+06	8.84515e+06	39144.1	8.8033e+06	3.59479e+06	4.46632e+06	24714.1	4.43967e+06	3.57272e+06	711612	3.57272e+06	0	0	0	711612	711612	0	2.84842e+06	574308	2.84573e+06	2518.72	1.16923e+06	2.32172e+06	7.99915e+06	6824.96	4967.21	1856.14	2504.5	1110.71	1391.68	207899
Median	Angola	AGO	UMC	Africa	Sub-Saharan Africa	Middle Africa	Other Africa	3.33828e+07	0.248245	8.26079e+06	4.07711e+06	4.07711e+06	0	0	0	0	0	4.20404e+06	4.07711e+06	9.22076e+06	42561.5	9.17853e+06	4.20404e+06	5.02473e+06	28325.2	4.99296e+06	4.07711e+06	853036	4.07711e+06	0	0	0	853036	853036	0	3.29899e+06	732568	3.29574e+06	3184.27	1.43018e+06	2.703e+06	8.33112e+06	7462.95	5431.89	2029.93	2966.46	1315.15	1646.81	253554
Upper quartile	Angola	AGO	UMC	Africa	Sub-Saharan Africa	Middle Africa	Other Africa	3.33828e+07	0.248245	8.61733e+06	4.69518e+06	4.69518e+06	0	0	0	0	0	4.71688e+06	4.69518e+06	9.64642e+06	46733.9	9.59963e+06	4.71688e+06	5.62566e+06	32485.7	5.5955e+06	4.69518e+06	1.04145e+06	4.69518e+06	0	0	0	1.04145e+06	1.04145e+06	0	3.8039e+06	937591	3.8011e+06	4103.19	1.69146e+06	3.07345e+06	8.69297e+06	8189.51	5954.03	2229.24	3515.47	1562.34	1960.55	319027
Max	Angola	AGO	UMC	Africa	Sub-Saharan Africa	Middle Africa	Other Africa	3.33828e+07	0.248245	1.00963e+07	6.86013e+06	6.86013e+06	0	595.088	0	595.088	0	6.97994e+06	6.86013e+06	1.13752e+07	71467	1.13225e+07	6.97994e+06	8.01436e+06	57381.8	7.96424e+06	6.86013e+06	2.02282e+06	6.86013e+06	0	595.088	0	2.02282e+06	2.02282e+06	0	5.71867e+06	2.2378e+06	5.71428e+06	11264.7	2.84906e+06	5.11617e+06	1.01843e+07	12554.7	9136.96	3517.24	7550.3	3408.51	4175.52	785275
Mean	Anguilla	AIA	UMC	Americas	Latin America and the Caribbean	Caribbean	Latin America	15481.7	0.666834	4885.35	2936.5	2936.5	0	0	0	0	2869.51	1948.85	66.9927	5147.12	45.078	5102.05	1948.85	3153.2	34.0007	3119.2	2936.5	182.697	66.9927	2869.51	0	0	182.697	182.697	0	54.398	12.5947	54.3422	0.0558625	498.315	1450.53	2094.92	7.89315	5.74299	2.15015	3.43512	1.52566	1.90947	55.0444
Min	Anguilla	AIA	UMC	Americas	Latin America and the Caribbean	Caribbean	Latin America	15481.7	0.666834	678.1	263.442	263.442	0	0	0	0	262.046	257.678	0	750.802	6.00121	744.8	257.678	416.335	1.71605	413.88	263.442	8.53894	0	262.046	0	0	8.53894	8.53894	0	0	0	0	0	39.5962	170.114	280.53	1.08145	0.772259	0.309186	0.0767073	0.0353287	0.0413786	0.807258
Lower quartile	Anguilla	AIA	UMC	Americas	Latin America and the Caribbean	Caribbean	Latin America	15481.7	0.666834	3051.45	1778.59	1778.59	0	0	0	0	1741.93	1155.97	20.7758	3316.41	29.0203	3290.2	1155.97	1994.39	17.3368	1972.18	1778.59	93.407	20.7758	1741.93	0	0	93.407	93.407	0	16.3029	2.33044	16.2882	0.0103206	254.763	863.029	1254.14	5.02013	3.65585	1.36744	1.42074	0.628107	0.799573	24.1351
Median	Anguilla	AIA	UMC	Americas	Latin America and the Caribbean	Caribbean	Latin America	15481.7	0.666834	4633.68	2726.56	2726.56	0	0	0	0	2653	1749.1	46.8842	4894.49	42.19	4851.97	1749.1	2944.42	28.0072	2914.53	2726.56	158.282	46.8842	2653	0	0	158.282	158.282	0	37.4615	6.43205	37.4292	0.028742	414.576	1296.55	1896.65	7.30426	5.32297	1.98432	2.56822	1.12799	1.44237	43.633
Upper quartile	Anguilla	AIA	UMC	Americas	Latin America and the Caribbean	Caribbean	Latin America	15481.7	0.666834	6385.44	3863.17	3863.17	0	0	0	0	3760.54	2503.93	93.873	6665.6	58.1086	6611.54	2503.93	4108.57	45.4062	4054.55	3863.17	246.379	93.873	3760.54	0	0	246.379	246.379	0	75.8816	16.2234	75.8051	0.0690963	659.547	1858.47	2703.1	10.1572	7.37116	2.77695	4.54015	2.00894	2.54058	74.3903
Max	Anguilla	AIA	UMC	Americas	Latin America and the Caribbean	Caribbean	Latin America	15481.7	0.666834	13505.5	9848.2	9848.2	0	0	0	0	9337.08	8978.32	511.122	13803.5	171.473	13700.2	8978.32	10042.9	184.316	9991.1	9848.2	754.887	511.122	9337.08	0	0	754.887	754.887	0	379.649	201.574	379.423	0.908707	2744.46	7646.67	9317.67	32.2234	24.2749	8.54894	30.8996	14.9455	16.4274	316.085
Mean	Åland	ALA	HIC	Europe	Northern Europe	NA	OECD EU countries	31773	0.580727	17132.6	17132.6	12921.1	4211.4	0.0311506	0	4211.43	12921.1	0	0	17182.2	20.8146	17161.3	0	17161.3	21.1469	17140.2	12921.1	4219.05	0	12921.1	0.0311506	0	4219.02	7.61325	4211.4	0	0	0	0	0	0	41.9615	3.64392	2.65225	0.991677	2.52897	1.55955	0.969423	0.173498
Min	Åland	ALA	HIC	Europe	Northern Europe	NA	OECD EU countries	31773	0.580727	10040.9	10040.9	6942.91	1007.62	0	0	1007.62	6942.91	0	0	10068.2	8.56939	10057.6	0	10057.6	8.92467	10045.3	6942.91	1015.7	0	6942.91	0	0	1015.7	2.34789	1007.62	0	0	0	0	0	0	19.7594	1.47499	1.08141	0.393583	0.895464	0.537853	0.299048	0.0126332
Lower quartile	Åland	ALA	HIC	Europe	Northern Europe	NA	OECD EU countries	31773	0.580727	15379.5	15379.5	11397.7	3329.14	0	0	3329.14	11397.7	0	0	15424.3	17.433	15407.7	0	15407.7	16.8469	15388.9	11397.7	3337.54	0	11397.7	0	0	3337.54	5.19479	3329.14	0	0	0	0	0	0	34.8271	3.04298	2.21774	0.827097	1.89762	1.1635	0.726037	0.10192
Median	Åland	ALA	HIC	Europe	Northern Europe	NA	OECD EU countries	31773	0.580727	17015.3	17015.3	12789.8	4108.35	0	0	4108.35	12789.8	0	0	17065.1	20.2591	17045.3	0	17045.3	20.2751	17025.9	12789.8	4113.44	0	12789.8	0	0	4113.44	7.61487	4108.35	0	0	0	0	0	0	40.7693	3.537	2.57437	0.965206	2.36334	1.45079	0.90133	0.158706
Upper quartile	Åland	ALA	HIC	Europe	Northern Europe	NA	OECD EU countries	31773	0.580727	18757.5	18757.5	14259	5016.34	0	0	5016.34	14259	0	0	18810.7	23.5632	18787.5	0	18787.5	24.5402	18764.5	14259	5022.98	0	14259	0	0	5022.98	10.0215	5016.34	0	0	0	0	0	0	47.7019	4.13377	3.00831	1.12297	2.94598	1.82826	1.13788	0.231014
Max	Åland	ALA	HIC	Europe	Northern Europe	NA	OECD EU countries	31773	0.580727	26254.9	26254.9	21244.9	9453.45	3.61449	0	9453.45	21244.9	0	0	26345.2	42.4783	26305.6	0	26305.6	51.8769	26265	21244.9	9466.12	0	21244.9	3.61449	0	9466.12	13.3879	9453.45	0	0	0	0	0	0	90.8072	7.44101	5.42816	2.01285	7.97439	5.09999	3.71322	0.525799
Mean	Albania	ALB	UMC	Europe	Southern Europe	NA	Other Eurasia	2.86458e+06	0.320894	1.15322e+06	945552	945552	0	0	0	0	900315	207670	45237.5	1.23164e+06	5017.41	1.22663e+06	207670	1.01896e+06	4077.87	1.01488e+06	945552	69325.8	45237.5	900315	0	0	69325.8	69325.8	0	36637.2	8600.24	36599.7	37.484	57874.8	149795	262003	878.148	639.158	238.99	434.626	192.962	241.664	20983.8
Min	Albania	ALB	UMC	Europe	Southern Europe	NA	Other Eurasia	2.86458e+06	0.320894	943153	735374	735374	0	0	0	0	690451	159009	44185.4	1.0248e+06	4418.12	1.01979e+06	159009	812008	3271.85	807946	735374	38747.3	44185.4	690451	0	0	38747.3	38747.3	0	16302.5	974.018	16289.8	5.35088	37159.7	118296	212446	772.546	562.756	209.79	331.676	144.76	186.916	10987.5
Lower quartile	Albania	ALB	UMC	Europe	Southern Europe	NA	Other Eurasia	2.86458e+06	0.320894	1.10602e+06	899926	899926	0	0	0	0	854643	191413	45020.9	1.18434e+06	4904.09	1.17929e+06	191413	971707	3894.41	967657	899926	59925.8	45020.9	854643	0	0	59925.8	59925.8	0	33451.7	4503.33	33417.2	19.3868	51210.7	139798	245729	858.451	624.771	233.582	409.101	181.443	227.421	17657
Median	Albania	ALB	UMC	Europe	Southern Europe	NA	Other Eurasia	2.86458e+06	0.320894	1.15042e+06	943408	943408	0	0	0	0	898015	204742	45236.5	1.22906e+06	5010.74	1.224e+06	204742	1.01711e+06	4048.8	1.01303e+06	943408	67822.6	45236.5	898015	0	0	67822.6	67822.6	0	37667.7	7589.54	37626.8	32.3863	56087.2	147932	259074	877.059	638.244	238.658	430.843	191.262	239.512	20260.8
Upper quartile	Albania	ALB	UMC	Europe	Southern Europe	NA	Other Eurasia	2.86458e+06	0.320894	1.20224e+06	991052	991052	0	0	0	0	945799	221105	45446	1.28048e+06	5123.79	1.27541e+06	221105	1.06532e+06	4232.62	1.06114e+06	991052	76898.4	45446	945799	0	0	76898.4	76898.4	0	40762.1	11782.2	40723.8	50.4534	63118.1	157919	275378	896.914	652.782	244.138	455.643	202.161	253.34	23463.5
Max	Albania	ALB	UMC	Europe	Southern Europe	NA	Other Eurasia	2.86458e+06	0.320894	1.40464e+06	1.19739e+06	1.19739e+06	0	0	0	0	1.15151e+06	315872	46532.2	1.50001e+06	5678.08	1.49446e+06	315872	1.28721e+06	5448.4	1.28238e+06	1.19739e+06	121758	46532.2	1.15151e+06	0	0	121758	121758	0	44434.3	28960.4	44386.6	149.21	110459	231281	370136	999.339	726.334	273.005	658.81	300.526	368.106	44316.7
Mean	Andorra	AND	HIC	Europe	Southern Europe	NA	Other Eurasia	77670.3	0.264891	47128.3	47128.3	40115.7	6960.84	51.6921	0	7012.53	40115.7	0	0	47234.3	42.9212	47191.4	0	47191.4	30.58	47160.8	40115.7	7045.09	0	40115.7	51.6921	0	6993.4	32.5599	6960.84	0	0	0	0	0	0	73.5012	7.50436	5.46182	2.04253	4.11566	2.53843	1.57723	0.750737
Min	Andorra	AND	HIC	Europe	Southern Europe	NA	Other Eurasia	77670.3	0.264891	27263.4	27263.4	20407.6	218.506	0	0	238.294	20407.6	0	0	27344.9	20.4548	27319.7	0	27319.7	9.913	27295.8	20407.6	268.423	0	20407.6	0	0	251.924	12.7562	218.506	0	0	0	0	0	0	30.8056	3.62142	2.65095	0.970464	1.00788	0.552757	0.311833	0.223904
Lower quartile	Andorra	AND	HIC	Europe	Southern Europe	NA	Other Eurasia	77670.3	0.264891	42056.1	42056.1	35326.6	4781.7	0	0	4849.23	35326.6	0	0	42151.1	36.4764	42119.3	0	42119.3	24.4739	42090.5	35326.6	4884.93	0	35326.6	0	0	4817.56	28.0966	4781.7	0	0	0	0	0	0	61.96	6.37023	4.62944	1.73074	3.14156	1.92578	1.17561	0.600606
Median	Andorra	AND	HIC	Europe	Southern Europe	NA	Other Eurasia	77670.3	0.264891	46955.3	46955.3	39866	6697.08	3.7185	0	6757.13	39866	0	0	47062.4	42.1623	47015.7	0	47015.7	29.602	46985.2	39866	6791.08	0	39866	3.7185	0	6732.31	32.4901	6697.08	0	0	0	0	0	0	71.7628	7.35583	5.36191	2.00071	3.90846	2.40457	1.49085	0.731895
Upper quartile	Andorra	AND	HIC	Europe	Southern Europe	NA	Other Eurasia	77670.3	0.264891	51980.6	51980.6	44548.4	8805.35	84.1851	0	8860.75	44548.4	0	0	52101	48.3902	52049.7	0	52049.7	35.6057	52013.9	44548.4	8893.91	0	44548.4	84.1851	0	8842.39	37.0377	8805.35	0	0	0	0	0	0	83.6662	8.47644	6.15799	2.31434	4.87821	3.00275	1.87994	0.880828
Max	Andorra	AND	HIC	Europe	Southern Europe	NA	Other Eurasia	77670.3	0.264891	72773.1	72773.1	63547.3	22281.3	606.665	0	22281.3	63547.3	0	0	72883.4	82.4419	72833.1	0	72833.1	74.2362	72803.1	63547.3	22316.8	0	63547.3	606.665	0	22316.8	51.1528	22281.3	0	0	0	0	0	0	156.124	14.0416	10.1594	3.90249	11.0872	6.86469	5.67751	1.55855
Mean	United Arab Emirates	ARE	HIC	Asia	Western Asia	NA	Middle East and North Africa	9.20699e+06	0.0993608	8.13727e+06	8.13727e+06	6.20396e+06	1.65045e+06	282861	0	1.93331e+06	6.20396e+06	0	0	8.14844e+06	3228.39	8.14522e+06	0	8.14522e+06	3235.11	8.14198e+06	6.20396e+06	1.93802e+06	0	6.20396e+06	282861	0	1.65516e+06	4714.13	1.65045e+06	0	0	0	0	0	0	6463.5	565.251	411.348	153.903	629.083	388.262	240.821	108.402
Min	United Arab Emirates	ARE	HIC	Asia	Western Asia	NA	Middle East and North Africa	9.20699e+06	0.0993608	6.86823e+06	6.86823e+06	5.00375e+06	1.39059e+06	260164	0	1.65747e+06	5.00375e+06	0	0	6.87685e+06	1626.02	6.87508e+06	0	6.87508e+06	968.607	6.87358e+06	5.00375e+06	1.66143e+06	0	5.00375e+06	260164	0	1.39355e+06	1861.9	1.39059e+06	0	0	0	0	0	0	2944.19	274.64	200.722	73.6762	187.412	108.815	62.2329	27.6278
Lower quartile	United Arab Emirates	ARE	HIC	Asia	Western Asia	NA	Middle East and North Africa	9.20699e+06	0.0993608	7.71282e+06	7.71282e+06	5.82315e+06	1.51127e+06	273838	0	1.79188e+06	5.82315e+06	0	0	7.72397e+06	2746.7	7.72046e+06	0	7.72046e+06	2483.77	7.71776e+06	5.82315e+06	1.79644e+06	0	5.82315e+06	273838	0	1.51571e+06	4005.6	1.51127e+06	0	0	0	0	0	0	5338.66	479.853	349.131	130.306	473.045	288.364	174.718	84.578
Median	United Arab Emirates	ARE	HIC	Asia	Western Asia	NA	Middle East and North Africa	9.20699e+06	0.0993608	8.06104e+06	8.06104e+06	6.13136e+06	1.60924e+06	281513	0	1.88792e+06	6.13136e+06	0	0	8.07195e+06	3151.96	8.06904e+06	0	8.06904e+06	3102.69	8.06604e+06	6.13136e+06	1.89239e+06	0	6.13136e+06	281513	0	1.61418e+06	4715.24	1.60924e+06	0	0	0	0	0	0	6338.14	552.189	401.525	150.261	600.227	368.048	226.419	105.574
Upper quartile	United Arab Emirates	ARE	HIC	Asia	Western Asia	NA	Middle East and North Africa	9.20699e+06	0.0993608	8.55239e+06	8.55239e+06	6.54489e+06	1.75112e+06	291376	0	2.03361e+06	6.54489e+06	0	0	8.56416e+06	3645.01	8.56066e+06	0	8.56066e+06	3854.77	8.55681e+06	6.54489e+06	2.03828e+06	0	6.54489e+06	291376	0	1.75627e+06	5422.87	1.75112e+06	0	0	0	0	0	0	7378.9	639.508	465.661	174.015	755.605	469.402	292.039	129.779
Max	United Arab Emirates	ARE	HIC	Asia	Western Asia	NA	Middle East and North Africa	9.20699e+06	0.0993608	9.6599e+06	9.6599e+06	7.82733e+06	2.61855e+06	324731	0	2.91585e+06	7.82733e+06	0	0	9.67163e+06	6910.45	9.66866e+06	0	9.66866e+06	8186.2	9.66432e+06	7.82733e+06	2.92169e+06	0	7.82733e+06	324731	0	2.62439e+06	7649.84	2.61855e+06	0	0	0	0	0	0	13659.4	1299.77	959.093	340.677	1648.8	1132.99	749.709	249.934
Mean	Argentina	ARG	UMC	Americas	Latin America and the Caribbean	South America	Latin America	4.50595e+07	0.139756	2.0071e+07	1.70289e+07	1.68173e+07	117958	93631	0	211589	1.57789e+07	3.04214e+06	1.03838e+06	2.15685e+07	53121.7	2.15154e+07	3.04214e+06	1.84733e+07	58015.7	1.84152e+07	1.68173e+07	1.59793e+06	1.03838e+06	1.57789e+07	93631	0	1.50429e+06	1.38634e+06	117958	838326	200051	837457	868.568	1.05737e+06	1.98477e+06	4.19165e+06	9296.43	6766.3	2530.12	6784.22	3012.27	3771.95	421789
Min	Argentina	ARG	UMC	Americas	Latin America and the Caribbean	South America	Latin America	4.50595e+07	0.139756	1.84086e+07	1.56383e+07	1.52524e+07	21088.3	74772.5	0	95866.2	1.43269e+07	2.55726e+06	833293	1.9866e+07	47318.7	1.98173e+07	2.55726e+06	1.70202e+07	48448	1.69647e+07	1.52524e+07	1.1356e+06	833293	1.43269e+07	74772.5	0	1.06077e+06	1.03103e+06	21088.3	415593	14690.2	414929	102.463	842708	1.62825e+06	3.64739e+06	8267.42	6009.45	2249.11	5441.89	2437.57	3004.32	299007
Lower quartile	Argentina	ARG	UMC	Americas	Latin America and the Caribbean	South America	Latin America	4.50595e+07	0.139756	1.97633e+07	1.67483e+07	1.65239e+07	41483.4	74930.4	0	119243	1.54895e+07	2.94446e+06	1.01412e+06	2.12434e+07	51983.6	2.11912e+07	2.94446e+06	1.81778e+07	55916.1	1.81202e+07	1.65239e+07	1.46871e+06	1.01412e+06	1.54895e+07	74930.4	0	1.38069e+06	1.3046e+06	41483.4	766360	117654	765596	487.064	1.00902e+06	1.91705e+06	4.08975e+06	9094.28	6618.52	2475.02	6470.71	2871.32	3597.6	391845
Median	Argentina	ARG	UMC	Americas	Latin America and the Caribbean	South America	Latin America	4.50595e+07	0.139756	2.00658e+07	1.70162e+07	1.68148e+07	51360.4	75322.2	0	134866	1.57788e+07	3.0387e+06	1.06559e+06	2.15609e+07	53084.6	2.15081e+07	3.0387e+06	1.84709e+07	57871.5	1.84132e+07	1.68148e+07	1.57001e+06	1.06559e+06	1.57788e+07	75322.2	0	1.47573e+06	1.3801e+06	51360.4	852418	181496	851580	764.065	1.05625e+06	1.98059e+06	4.18773e+06	9288.42	6759.29	2528.81	6753.23	2997.41	3754.99	418271
Upper quartile	Argentina	ARG	UMC	Americas	Latin America and the Caribbean	South America	Latin America	4.50595e+07	0.139756	2.0375e+07	1.73072e+07	1.71112e+07	145586	78266.6	0	282235	1.60616e+07	3.13668e+06	1.07068e+06	2.18874e+07	54221.1	2.18332e+07	3.13668e+06	1.87612e+07	59902.5	1.87024e+07	1.71112e+07	1.70185e+06	1.07068e+06	1.60616e+07	78266.6	0	1.60288e+06	1.46051e+06	145586	923913	266979	922822	1149.43	1.10317e+06	2.05268e+06	4.29596e+06	9491.17	6908.7	2582.75	7050.74	3133.54	3921.72	446972
Max	Argentina	ARG	UMC	Americas	Latin America and the Caribbean	South America	Latin America	4.50595e+07	0.139756	2.21762e+07	1.87229e+07	1.85844e+07	586360	334918	0	781214	1.75144e+07	3.63162e+06	1.08705e+06	2.38633e+07	59811.2	2.38035e+07	3.63162e+06	2.02923e+07	70940.7	2.02295e+07	1.85844e+07	2.33059e+06	1.08705e+06	1.75144e+07	334918	0	2.24903e+06	1.9131e+06	586360	1.0533e+06	632882	1.05196e+06	2934.97	1.3245e+06	2.38144e+06	4.78716e+06	10353.9	7536.11	2829.81	8876.49	3939.01	4937.48	622793
Mean	Armenia	ARM	LMC	Asia	Western Asia	NA	Other Eurasia	2.80762e+06	0.232096	822799	748400	748400	0	0	0	0	641838	74398.3	106562	897683	4887.35	892795	74398.3	818397	6368.4	812029	748400	63628.3	106562	641838	0	0	63628.3	63628.3	0	86196.2	20365.9	86107.8	88.3564	41521.3	32877	192216	855.419	622.514	232.904	725.801	303.555	422.246	19296.1
Min	Armenia	ARM	LMC	Asia	Western Asia	NA	Other Eurasia	2.80762e+06	0.232096	611149	559530	559530	0	0	0	0	493177	40102.7	59708.2	652828	3003.67	649813	40102.7	598194	2909.89	594971	559530	15056.5	59708.2	493177	0	0	15056.5	15056.5	0	48321.2	5005.04	48266.8	25.9717	17449.5	10779.8	108089	495.579	359.157	136.422	262.642	97.6124	149.276	4082.88
Lower quartile	Armenia	ARM	LMC	Asia	Western Asia	NA	Other Eurasia	2.80762e+06	0.232096	776782	709151	709151	0	0	0	0	611071	65614.4	94873.5	849731	4505.32	845115	65614.4	776324	5534.96	770636	709151	47770.2	94873.5	611071	0	0	47770.2	47770.2	0	76128.4	15653.9	76047.9	67.8307	34715.2	26513.4	171781	785.89	571.917	213.931	596.77	246.075	343.23	13852.3
Median	Armenia	ARM	LMC	Asia	Western Asia	NA	Other Eurasia	2.80762e+06	0.232096	819942	745915	745915	0	0	0	0	639213	73441.3	105725	895508	4876.68	890626	73441.3	816339	6290.45	810073	745915	59920.7	105725	639213	0	0	59920.7	59920.7	0	85246.2	19584	85161.3	84.8562	40689.2	32053.4	190495	853.37	621.001	231.902	705.78	295.651	409.164	17740.2
Upper quartile	Armenia	ARM	LMC	Asia	Western Asia	NA	Other Eurasia	2.80762e+06	0.232096	865166	785197	785197	0	0	0	0	670561	82477.1	117168	942516	5249.27	937286	82477.1	856813	7128.31	850318	785197	75809.2	117168	670561	0	0	75809.2	75809.2	0	95396.1	24223.6	95300.4	105.343	47573.6	38233.3	211444	920.397	669.799	250.894	837.347	352.287	486.921	23007.2
Max	Armenia	ARM	LMC	Asia	Western Asia	NA	Other Eurasia	2.80762e+06	0.232096	1.10294e+06	976772	976772	0	0	0	0	806322	131497	182220	1.1867e+06	7026.08	1.17992e+06	131497	1.04842e+06	11634.6	1.03906e+06	976772	169365	182220	806322	0	0	169365	169365	0	145580	51130.3	145384	249.446	84954.8	74808	329856	1269.57	930.65	341.014	1731	826.083	988.569	66261.9
Mean	American Samoa	ASM	UMC	Oceania	Polynesia	NA	Other non-OECD Asia	45987.7	0.240332	16404.6	14456	14390.3	65.7172	0	0	65.7172	14284.2	1948.53	106.106	17827	93.2213	17733.7	1948.53	15785.2	81.6361	15703.6	14390.3	1313.24	106.106	14284.2	0	0	1313.24	1247.52	65.7172	85.8849	20.2208	85.7962	0.0887201	652.811	1295.72	2229.49	16.3157	11.8767	4.439	9.87711	4.38979	5.48732	376.141
Min	American Samoa	ASM	UMC	Oceania	Polynesia	NA	Other non-OECD Asia	45987.7	0.240332	5180.52	4559.29	4533.5	0	0	0	0	4478.14	564.347	4.53187	6460.08	31.9702	6420.66	564.347	5137.78	12.6597	5102.73	4533.5	164.203	4.53187	4478.14	0	0	164.203	151.979	0	3.92955	0.27647	3.92751	0.00204432	150.742	328.486	631.413	5.20298	3.87345	1.32953	1.26047	0.472326	0.788146	25.8201
Lower quartile	American Samoa	ASM	UMC	Oceania	Polynesia	NA	Other non-OECD Asia	45987.7	0.240332	12890.4	11258.1	11205.5	0	0	0	0	11121.6	1474.92	58.1872	14271.8	74.1538	14197.2	1474.92	12563.2	55.3399	12507.4	11205.5	837.34	58.1872	11121.6	0	0	837.34	774.911	0	46.3251	8.32103	46.2756	0.0349028	451.928	964.517	1710.07	12.9219	9.41607	3.50348	6.47576	2.8673	3.57734	210.925
Median	American Samoa	ASM	UMC	Oceania	Polynesia	NA	Other non-OECD Asia	45987.7	0.240332	15720.8	13784.8	13754.5	2.59131	0	0	2.59131	13637.8	1831	93.8456	17088.8	89.6911	16997.6	1831	15115.8	74.9634	15046.5	13754.5	1205	93.8456	13637.8	0	0	1205	1130.54	2.59131	75.5281	15.375	75.4685	0.0672935	598.406	1212.68	2108.56	15.719	11.4274	4.27446	9.02027	3.99151	4.97098	326.634
Upper quartile	American Samoa	ASM	UMC	Oceania	Polynesia	NA	Other non-OECD Asia	45987.7	0.240332	19514.3	17152.6	17085.5	90.6774	0	0	90.6774	16924	2316.21	140.025	20980	109.143	20867.2	2316.21	18572.7	101.552	18481	17085.5	1677.06	140.025	16924	0	0	1677.06	1609.24	90.6774	113.602	26.5911	113.507	0.115036	797.067	1542.1	2630.48	19.0576	13.8939	5.20752	12.2381	5.431	6.79692	490.009
Max	American Samoa	ASM	UMC	Oceania	Polynesia	NA	Other non-OECD Asia	45987.7	0.240332	31845.1	29120.3	28820.5	866.884	0	0	866.884	28552.2	5577.08	421.399	33316.2	205.932	33163.4	5577.08	30438.6	332.471	30342.4	28820.5	3774.36	421.399	28552.2	0	0	3774.36	3771.36	866.884	396.124	145.617	395.292	0.831563	2209.36	3971.8	6128.38	35.8745	26.7358	9.69385	43.9461	19.3694	24.5767	1503.39
Mean	Antigua and Barbuda	ATG	HIC	Americas	Latin America and the Caribbean	Caribbean	Latin America	92220.2	0.243784	52607.7	52209	50274.7	1934.27	0	0	1934.27	50274.7	398.693	0	52760.6	52.2543	52708.3	398.693	52309.6	60.8333	52248.8	50274.7	1974.1	0	50274.7	0	0	1974.1	39.8292	1934.27	0	0	0	0	263.114	135.579	511.781	9.14276	6.65445	2.48831	8.05045	4.95742	3.09303	0.914229
Min	Antigua and Barbuda	ATG	HIC	Americas	Latin America and the Caribbean	Caribbean	Latin America	92220.2	0.243784	22211.5	21995.2	21487.6	0	0	0	0	21487.6	0	0	22327.3	20.1017	22298.1	0	22081.8	17.8952	22042.1	21487.6	17.5007	0	21487.6	0	0	17.5007	13.8399	0	0	0	0	0	0	0	47.6263	3.31194	2.42153	0.890411	1.74591	1.10023	0.645679	0.127433
Lower quartile	Antigua and Barbuda	ATG	HIC	Americas	Latin America and the Caribbean	Caribbean	Latin America	92220.2	0.243784	41391.4	41091.8	39340.4	466.278	0	0	466.278	39340.4	117.931	0	41529	41.4488	41490.4	117.931	41193.1	44.6294	41137.9	39340.4	507.367	0	39340.4	0	0	507.367	29.0623	466.278	0	0	0	0	74.5546	32.3163	225.88	7.23584	5.26707	1.9756	5.6761	3.47754	2.12584	0.5932
Median	Antigua and Barbuda	ATG	HIC	Americas	Latin America and the Caribbean	Caribbean	Latin America	92220.2	0.243784	51949.7	51486.9	49347.3	1049.68	0	0	1049.68	49347.3	231.858	0	52089.7	50.3837	52041.4	231.858	51584.7	56.6327	51522.4	49347.3	1089.17	0	49347.3	0	0	1089.17	39.7779	1049.68	0	0	0	0	150.88	75.031	347.518	8.76717	6.38332	2.38725	7.31726	4.49969	2.79127	0.837063
Upper quartile	Antigua and Barbuda	ATG	HIC	Americas	Latin America and the Caribbean	Caribbean	Latin America	92220.2	0.243784	63705.2	63183.6	60646	2173.59	0	0	2173.59	60646	554.628	0	63901	60.6551	63837.2	554.628	63289.9	72.442	63221.7	60646	2212.42	0	60646	0	0	2212.42	50.4319	2173.59	0	0	0	0	356.047	161.409	651.369	10.6166	7.71966	2.88881	9.64255	5.87892	3.72102	1.17889
Max	Antigua and Barbuda	ATG	HIC	Americas	Latin America and the Caribbean	Caribbean	Latin America	92220.2	0.243784	95463.9	93743.8	90087.8	14690.2	0	0	14690.2	90087.8	3261.16	0	95693.7	117.358	95613.8	3261.16	93893.7	198.265	93802.1	90087.8	14736.5	0	90087.8	0	0	14736.5	69.208	14690.2	0	0	0	0	2697.77	1589.4	3466.98	20.6019	14.8532	5.82128	29.8655	18.0206	13.8086	2.53599
Mean	Australia	AUS	HIC	Oceania	Australia and New Zealand	NA	OECD Oceania	2.56276e+07	0.176106	1.35206e+07	1.35206e+07	9.07307e+06	3.94649e+06	501068	0	4.44756e+06	9.07307e+06	0	0	1.35479e+07	8334.59	1.35396e+07	0	1.35396e+07	6966.48	1.35326e+07	9.07307e+06	4.45958e+06	0	9.07307e+06	501068	0	3.95851e+06	12024.4	3.94649e+06	0	0	0	0	0	0	15301.1	1458.71	1061.69	397.015	719.377	443.823	275.554	276.147
Min	Australia	AUS	HIC	Oceania	Australia and New Zealand	NA	OECD Oceania	2.56276e+07	0.176106	1.22941e+07	1.22941e+07	7.95844e+06	3.2763e+06	251957	0	3.728e+06	7.95844e+06	0	0	1.23207e+07	7193.82	1.2313e+07	0	1.2313e+07	5681	1.23059e+07	7.95844e+06	3.74006e+06	0	7.95844e+06	251957	0	3.28846e+06	10210.4	3.2763e+06	0	0	0	0	0	0	13063.6	1265.4	922.17	343.232	575.548	352.309	218.32	206.757
Lower quartile	Australia	AUS	HIC	Oceania	Australia and New Zealand	NA	OECD Oceania	2.56276e+07	0.176106	1.32488e+07	1.32488e+07	8.84561e+06	3.80986e+06	441161	0	4.29116e+06	8.84561e+06	0	0	1.32761e+07	8084.62	1.32677e+07	0	1.32677e+07	6706.11	1.32607e+07	8.84561e+06	4.30355e+06	0	8.84561e+06	441161	0	3.82186e+06	11644.1	3.80986e+06	0	0	0	0	0	0	14830.2	1415.54	1030.22	385.142	687.772	423.998	262.418	263.572
Median	Australia	AUS	HIC	Oceania	Australia and New Zealand	NA	OECD Oceania	2.56276e+07	0.176106	1.35171e+07	1.35171e+07	9.06706e+06	3.94674e+06	494744	0	4.44578e+06	9.06706e+06	0	0	1.35445e+07	8326.72	1.3536e+07	0	1.3536e+07	6952.59	1.35289e+07	9.06706e+06	4.45775e+06	0	9.06706e+06	494744	0	3.95884e+06	12023.7	3.94674e+06	0	0	0	0	0	0	15284.9	1457.29	1060.82	396.741	716.432	442.031	274.592	275.564
Upper quartile	Australia	AUS	HIC	Oceania	Australia and New Zealand	NA	OECD Oceania	2.56276e+07	0.176106	1.37878e+07	1.37878e+07	9.28417e+06	4.07886e+06	556146	0	4.5976e+06	9.28417e+06	0	0	1.38156e+07	8561.57	1.38072e+07	0	1.38072e+07	7222.31	1.38e+07	9.28417e+06	4.60971e+06	0	9.28417e+06	556146	0	4.09094e+06	12409.2	4.07886e+06	0	0	0	0	0	0	15749.6	1498.8	1090.75	408.153	749.191	462.583	287.566	288.102
Max	Australia	AUS	HIC	Oceania	Australia and New Zealand	NA	OECD Oceania	2.56276e+07	0.176106	1.4981e+07	1.4981e+07	1.01942e+07	4.67239e+06	970198	0	5.28355e+06	1.01942e+07	0	0	1.50103e+07	9645.42	1.50011e+07	0	1.50011e+07	8275.28	1.49931e+07	1.01942e+07	5.29516e+06	0	1.01942e+07	970198	0	4.68321e+06	13886.6	4.67239e+06	0	0	0	0	0	0	17704.7	1686.12	1224.85	461.268	907.742	582.072	349.126	340.272
Mean	Austria	AUT	HIC	Europe	Western Europe	NA	OECD EU countries	8.9048e+06	0.412167	5.12304e+06	5.12304e+06	2.58534e+06	1.05923e+06	214003	1.26447e+06	2.5377e+06	2.58534e+06	0	0	5.13438e+06	4512.64	5.12987e+06	0	5.12987e+06	3827.54	5.12604e+06	2.58534e+06	2.54071e+06	0	2.58534e+06	214003	1.26447e+06	1.06223e+06	3002.4	1.05923e+06	0	0	0	0	0	0	8340.18	789.967	574.986	214.982	456.694	281.725	174.97	68.8834
Min	Austria	AUT	HIC	Europe	Western Europe	NA	OECD EU countries	8.9048e+06	0.412167	3.189e+06	3.189e+06	158144	211478	0	0	667755	158144	0	0	3.19727e+06	1831.84	3.19455e+06	0	3.19455e+06	1363.06	3.19236e+06	158144	669693	0	158144	0	0	213980	1486.71	211478	0	0	0	0	0	0	3427.75	312.762	228.871	83.891	111.794	77.4724	34.3211	26.4902
Lower quartile	Austria	AUT	HIC	Europe	Western Europe	NA	OECD EU countries	8.9048e+06	0.412167	4.6894e+06	4.6894e+06	2.09898e+06	843059	88863.1	813879	2.04857e+06	2.09898e+06	0	0	4.6992e+06	3817.71	4.69541e+06	0	4.69541e+06	3088.07	4.69221e+06	2.09898e+06	2.05201e+06	0	2.09898e+06	88863.1	813879	845839	2603.8	843059	0	0	0	0	0	0	7047.63	668.302	487.275	181.936	352.055	215.172	132.545	55.9511
Median	Austria	AUT	HIC	Europe	Western Europe	NA	OECD EU countries	8.9048e+06	0.412167	5.0868e+06	5.0868e+06	2.55711e+06	1.0414e+06	184525	1.22244e+06	2.50523e+06	2.55711e+06	0	0	5.09897e+06	4412.21	5.09389e+06	0	5.09389e+06	3692.18	5.09001e+06	2.55711e+06	2.50878e+06	0	2.55711e+06	184525	1.22244e+06	1.04459e+06	3014.47	1.0414e+06	0	0	0	0	0	0	8160.32	773.716	563.141	210.237	430.498	266.188	163.668	67.1342
Upper quartile	Austria	AUT	HIC	Europe	Western Europe	NA	OECD EU countries	8.9048e+06	0.412167	5.51696e+06	5.51696e+06	3.0578e+06	1.25894e+06	305798	1.66537e+06	2.9812e+06	3.0578e+06	0	0	5.52896e+06	5073.7	5.52382e+06	0	5.52382e+06	4421.7	5.51912e+06	3.0578e+06	2.98441e+06	0	3.0578e+06	305798	1.66537e+06	1.2619e+06	3401.33	1.25894e+06	0	0	0	0	0	0	9417.95	888.237	646.842	241.653	534.16	329.059	205.758	80.0904
Max	Austria	AUT	HIC	Europe	Western Europe	NA	OECD EU countries	8.9048e+06	0.412167	7.75935e+06	7.75935e+06	5.50845e+06	2.33278e+06	992545	3.88708e+06	5.39734e+06	5.50845e+06	0	0	7.77403e+06	9410.41	7.76781e+06	0	7.76781e+06	10822.4	7.76212e+06	5.50845e+06	5.39945e+06	0	5.50845e+06	992545	3.88708e+06	2.33597e+06	4466.98	2.33278e+06	0	0	0	0	0	0	18704.1	1693.86	1229.35	464.502	1385.94	860.047	577.119	141.891
Mean	Azerbaijan	AZE	UMC	Asia	Western Asia	NA	Other Eurasia	1.02315e+07	0.209291	2.67969e+06	2.4067e+06	2.06955e+06	0	41499.3	295650	337149	136342	272989	1.93321e+06	2.99095e+06	9457.74	2.98149e+06	272989	2.7085e+06	13156.2	2.69535e+06	2.06955e+06	625799	1.93321e+06	136342	41499.3	295650	288650	288650	0	1.56325e+06	369959	1.56164e+06	1603.68	86950.7	186038	2.22881e+06	1655.24	1204.75	450.491	1495.92	664.143	831.775	87731.5
Min	Azerbaijan	AZE	UMC	Asia	Western Asia	NA	Other Eurasia	1.02315e+07	0.209291	2.07341e+06	1.82005e+06	1.69633e+06	0	13221.8	94237.1	107459	43458.4	209238	1.61243e+06	2.30393e+06	7966.07	2.29553e+06	209238	2.04218e+06	9796.4	2.03069e+06	1.69633e+06	318092	1.61243e+06	43458.4	13221.8	94237.1	145769	145769	0	1.24494e+06	216589	1.2437e+06	1002	63909.6	145328	1.86492e+06	1368.5	991.433	377.011	1017.65	453.693	563.961	44161.1
Lower quartile	Azerbaijan	AZE	UMC	Asia	Western Asia	NA	Other Eurasia	1.02315e+07	0.209291	2.50326e+06	2.23656e+06	1.96966e+06	0	31319.8	223173	254485	102919	258827	1.85638e+06	2.81466e+06	9107.71	2.80529e+06	258827	2.53836e+06	12323.9	2.52518e+06	1.96966e+06	536671	1.85638e+06	102919	31319.8	223173	249443	249443	0	1.49454e+06	334806	1.49307e+06	1448.5	81186.3	176258	2.1438e+06	1592.93	1159.22	433.49	1383.11	613.117	768.247	73783.7
Median	Azerbaijan	AZE	UMC	Asia	Western Asia	NA	Other Eurasia	1.02315e+07	0.209291	2.64832e+06	2.37292e+06	2.0594e+06	0	38680.2	275493	314172	127047	270533	1.92788e+06	2.95823e+06	9428.46	2.94876e+06	270533	2.67724e+06	13033.2	2.66416e+06	2.0594e+06	609079	1.92788e+06	127047	38680.2	275493	279282	279282	0	1.55799e+06	366620	1.55627e+06	1591.17	85879.2	184752	2.22413e+06	1650.12	1200.51	449.191	1484.33	659.066	825.415	83835.1
Upper quartile	Azerbaijan	AZE	UMC	Asia	Western Asia	NA	Other Eurasia	1.02315e+07	0.209291	2.82369e+06	2.54842e+06	2.15665e+06	0	49494.7	352588	402077	162599	283605	2.00365e+06	3.13907e+06	9766.92	3.12924e+06	283605	2.85216e+06	13907.8	2.83849e+06	2.15665e+06	696596	2.00365e+06	162599	49494.7	352588	319230	319230	0	1.62877e+06	401031	1.62714e+06	1735.5	91192.8	193650	2.30635e+06	1710.67	1245.21	465.742	1596.42	709.312	888.468	97845.3
Max	Azerbaijan	AZE	UMC	Asia	Western Asia	NA	Other Eurasia	1.02315e+07	0.209291	3.54002e+06	3.27319e+06	2.62061e+06	0	81388.5	580087	661476	267513	402629	2.3767e+06	3.87091e+06	11680.3	3.85934e+06	402629	3.57325e+06	20748.6	3.55736e+06	2.62061e+06	1.08679e+06	2.3767e+06	267513	81388.5	580087	508049	508049	0	1.97848e+06	613371	1.97675e+06	2563.33	139965	280942	2.70413e+06	2081.42	1514.59	566.83	2423.62	1047.93	1375.69	198613
Mean	Burundi	BDI	LIC	Africa	Sub-Saharan Africa	Eastern Africa	Other Africa	1.22204e+07	0.163751	1.85589e+06	516973	516973	0	0	0	0	0	1.33892e+06	516973	2.08573e+06	42342.6	2.04339e+06	1.33892e+06	704471	13335.6	691135	516973	174163	516973	0	0	0	174163	174163	0	418132	98840.5	417702	429.823	913841	425081	1.91157e+06	7410.07	5393.5	2016.57	1202.26	502.41	699.846	52922.3
Min	Burundi	BDI	LIC	Africa	Sub-Saharan Africa	Eastern Africa	Other Africa	1.22204e+07	0.163751	1.60762e+06	349181	349181	0	0	0	0	0	1.09374e+06	349181	1.82183e+06	35362.4	1.78624e+06	1.09374e+06	527059	9579.23	517479	349181	135905	349181	0	0	0	135905	135905	0	277228	61493.4	276923	259.359	697274	298296	1.65598e+06	6214.12	4519.19	1683.95	777.996	320.419	443.709	38270.1
Lower quartile	Burundi	BDI	LIC	Africa	Sub-Saharan Africa	Eastern Africa	Other Africa	1.22204e+07	0.163751	1.79875e+06	486769	486769	0	0	0	0	0	1.289e+06	486769	2.02627e+06	40868	1.98514e+06	1.289e+06	673293	12571	660545	486769	165168	486769	0	0	0	165168	165168	0	392904	90159.4	392487	392.087	875694	397861	1.85308e+06	7148.49	5203.78	1945.19	1105.06	458.951	641.216	49460.3
Median	Burundi	BDI	LIC	Africa	Sub-Saharan Africa	Eastern Africa	Other Africa	1.22204e+07	0.163751	1.85098e+06	515179	515179	0	0	0	0	0	1.33521e+06	515179	2.08085e+06	42241.5	2.03842e+06	1.33521e+06	702270	13294.6	688923	515179	173372	515179	0	0	0	173372	173372	0	415764	98241	415342	425.988	909632	422514	1.90624e+06	7393	5382.47	2012.14	1195.31	498.407	694.386	52485.7
Upper quartile	Burundi	BDI	LIC	Africa	Sub-Saharan Africa	Eastern Africa	Other Africa	1.22204e+07	0.163751	1.91131e+06	545548	545548	0	0	0	0	0	1.38691e+06	545548	2.14222e+06	43755.7	2.09892e+06	1.38691e+06	733827	14053.7	720275	545548	182612	545548	0	0	0	182612	182612	0	441960	106444	441519	463.241	949841	449296	1.96814e+06	7650.17	5567.81	2082.29	1289.08	540.325	752.373	56044.2
Max	Burundi	BDI	LIC	Africa	Sub-Saharan Africa	Eastern Africa	Other Africa	1.22204e+07	0.163751	2.1701e+06	682777	682777	0	0	0	0	0	1.61807e+06	682777	2.39348e+06	50904.4	2.34541e+06	1.61807e+06	885852	18450.1	870036	682777	224503	682777	0	0	0	224503	224503	0	577725	149378	577193	667.909	1.14253e+06	579524	2.23251e+06	8951.59	6565.98	2447.31	1974.71	826.875	1256.52	73534
Mean	Belgium	BEL	HIC	Europe	Western Europe	NA	OECD EU countries	1.15618e+07	0.213593	5.38874e+06	5.38874e+06	2.73392e+06	1.20471e+06	352773	1.09734e+06	2.65482e+06	2.73392e+06	0	0	5.40178e+06	4270.56	5.39751e+06	0	5.39751e+06	3589.73	5.39392e+06	2.73392e+06	2.66e+06	0	2.73392e+06	352773	1.09734e+06	1.20989e+06	5178.56	1.20471e+06	0	0	0	0	0	0	7860.3	747.452	544.039	203.413	420.69	259.427	161.263	119.15
Min	Belgium	BEL	HIC	Europe	Western Europe	NA	OECD EU countries	1.15618e+07	0.213593	4.56893e+06	4.56893e+06	1.67285e+06	676853	95922.2	312037	1.6397e+06	1.67285e+06	0	0	4.58151e+06	3278.92	4.57762e+06	0	4.57762e+06	2374.76	4.5746e+06	1.67285e+06	1.64506e+06	0	1.67285e+06	95922.2	312037	680779	3545.36	676853	0	0	0	0	0	0	5653.67	572.536	413.254	156.457	258.124	158.573	98.0494	64.9016
Lower quartile	Belgium	BEL	HIC	Europe	Western Europe	NA	OECD EU countries	1.15618e+07	0.213593	5.21904e+06	5.21904e+06	2.51066e+06	1.09535e+06	290254	899213	2.41989e+06	2.51066e+06	0	0	5.23188e+06	4043.81	5.22767e+06	0	5.22767e+06	3318.69	5.22427e+06	2.51066e+06	2.4252e+06	0	2.51066e+06	290254	899213	1.10031e+06	4840.1	1.09535e+06	0	0	0	0	0	0	7409.58	707.102	514.563	192.124	380.871	233.924	145.591	107.825
Median	Belgium	BEL	HIC	Europe	Western Europe	NA	OECD EU countries	1.15618e+07	0.213593	5.38285e+06	5.38285e+06	2.73189e+06	1.20281e+06	348492	1.08696e+06	2.64716e+06	2.73189e+06	0	0	5.39529e+06	4251.21	5.39111e+06	0	5.39111e+06	3575.2	5.38766e+06	2.73189e+06	2.65201e+06	0	2.73189e+06	348492	1.08696e+06	1.20821e+06	5182.62	1.20281e+06	0	0	0	0	0	0	7832.62	744.635	542.036	202.696	417.564	257.001	159.572	118.638
Upper quartile	Belgium	BEL	HIC	Europe	Western Europe	NA	OECD EU countries	1.15618e+07	0.213593	5.55309e+06	5.55309e+06	2.95382e+06	1.30865e+06	408720	1.28433e+06	2.88528e+06	2.95382e+06	0	0	5.56653e+06	4483.19	5.56227e+06	0	5.56227e+06	3842.96	5.55855e+06	2.95382e+06	2.89053e+06	0	2.95382e+06	408720	1.28433e+06	1.3135e+06	5507.48	1.30865e+06	0	0	0	0	0	0	8286.2	786.196	572.156	213.949	456.986	281.673	175.391	129.364
Max	Belgium	BEL	HIC	Europe	Western Europe	NA	OECD EU countries	1.15618e+07	0.213593	6.30273e+06	6.30273e+06	4.0047e+06	1.78406e+06	796158	2.03929e+06	3.92616e+06	4.0047e+06	0	0	6.3166e+06	5508.48	6.31195e+06	0	6.31195e+06	5284.6	6.30782e+06	4.0047e+06	3.9307e+06	0	4.0047e+06	796158	2.03929e+06	1.78945e+06	7011.22	1.78406e+06	0	0	0	0	0	0	10650	996.286	730.687	270.62	671.692	420.862	265.487	183.421
Mean	Benin	BEN	LIC	Africa	Sub-Saharan Africa	Western Africa	Other Africa	1.2638e+07	0.277689	2.47232e+06	820822	820822	0	0	0	0	0	1.6515e+06	820822	2.6885e+06	47620.1	2.64088e+06	1.6515e+06	989375	12825.3	976550	820822	155728	820822	0	0	0	155728	155728	0	664290	156532	663607	683.769	1.14613e+06	505370	2.53277e+06	8331.53	6064.01	2267.52	1060.29	443.21	617.078	47283.5
Min	Benin	BEN	LIC	Africa	Sub-Saharan Africa	Western Africa	Other Africa	1.2638e+07	0.277689	1.88246e+06	607098	607098	0	0	0	0	0	1.24564e+06	607098	2.07012e+06	36480.4	2.03111e+06	1.24564e+06	757494	8479.6	747602	607098	98216.4	607098	0	0	0	98216.4	98216.4	0	466824	81770.1	466319	376.999	846114	317679	1.93136e+06	6347.84	4605.51	1718.43	599.988	258.398	335.149	26656.4
Lower quartile	Benin	BEN	LIC	Africa	Sub-Saharan Africa	Western Africa	Other Africa	1.2638e+07	0.277689	2.35829e+06	764347	764347	0	0	0	0	0	1.56958e+06	764347	2.57043e+06	45504.6	2.52527e+06	1.56958e+06	929404	11717.3	917262	764347	142600	764347	0	0	0	142600	142600	0	616142	135719	615479	591.956	1.07769e+06	456403	2.41664e+06	7950.46	5787.58	2160.23	928.866	384.859	539.194	42239.9
Median	Benin	BEN	LIC	Africa	Sub-Saharan Africa	Western Africa	Other Africa	1.2638e+07	0.277689	2.47052e+06	815685	815685	0	0	0	0	0	1.65292e+06	815685	2.6851e+06	47612.3	2.63805e+06	1.65292e+06	983941	12690.6	971258	815685	154777	815685	0	0	0	154777	154777	0	659092	152556	658427	666.028	1.14267e+06	500223	2.53068e+06	8324.9	6058.41	2266.37	1034.96	430.907	603.606	46848
Upper quartile	Benin	BEN	LIC	Africa	Sub-Saharan Africa	Western Africa	Other Africa	1.2638e+07	0.277689	2.5906e+06	870018	870018	0	0	0	0	0	1.7365e+06	870018	2.81159e+06	49774	2.76193e+06	1.7365e+06	1.04119e+06	13779.1	1.02745e+06	870018	168041	870018	0	0	0	168041	168041	0	706721	173460	705911	757.638	1.21331e+06	550046	2.65307e+06	8716.3	6343.25	2372.6	1160.55	487.243	677.419	51572.4
Max	Benin	BEN	LIC	Africa	Sub-Saharan Africa	Western Africa	Other Africa	1.2638e+07	0.277689	3.09876e+06	1.16383e+06	1.16383e+06	0	0	0	0	0	2.08424e+06	1.16383e+06	3.3117e+06	59001	3.25545e+06	2.08424e+06	1.34109e+06	21585.6	1.32757e+06	1.16383e+06	241344	1.16383e+06	0	0	0	241344	241344	0	967005	346885	965693	1552.62	1.51743e+06	784359	3.1691e+06	10462.4	7574.37	2888	2645.61	1462.75	1429.09	78831
Mean	Bonaire, Sint Eustatius and Saba	BES	HIC	Americas	Latin America and the Caribbean	Caribbean	Latin America	26103.4	0.373719	15460.6	15330.4	14280.7	1049.7	0	0	1049.7	14280.7	130.158	0	15501	13.8989	15487.1	130.158	15356.9	17.2336	15339.7	14280.7	1058.96	0	14280.7	0	0	1058.96	9.25964	1049.7	0	0	0	0	86.0408	44.1169	161.29	2.43672	1.77389	0.662829	2.40894	1.48986	0.919078	0.21415
Min	Bonaire, Sint Eustatius and Saba	BES	HIC	Americas	Latin America and the Caribbean	Caribbean	Latin America	26103.4	0.373719	4195.65	4142.41	3929.01	0	0	0	0	3929.01	0	0	4214.03	3.17066	4209.76	0	4156.52	1.73126	4150.49	3929.01	2.8928	0	3929.01	0	0	2.8928	2.71407	0	0	0	0	0	0	0	6.72057	0.532617	0.392219	0.140398	0.251808	0.169104	0.0786668	0.00445364
Lower quartile	Bonaire, Sint Eustatius and Saba	BES	HIC	Americas	Latin America and the Caribbean	Caribbean	Latin America	26103.4	0.373719	11513.2	11409.6	10581.6	46.7474	0	0	46.7474	10581.6	8.25684	0	11548.3	10.143	11538.2	8.25684	11431.7	11.1392	11418.2	10581.6	56.0084	0	10581.6	0	0	56.0084	6.03948	46.7474	0	0	0	0	5.05237	0.933999	44.5707	1.77454	1.29441	0.481495	1.42445	0.871951	0.528827	0.117778
Median	Bonaire, Sint Eustatius and Saba	BES	HIC	Americas	Latin America and the Caribbean	Caribbean	Latin America	26103.4	0.373719	15320.9	15218.7	14004.6	345.205	0	0	345.205	14004.6	74.1795	0	15360.1	13.3611	15348.5	74.1795	15241.5	15.6167	15226	14004.6	353.091	0	14004.6	0	0	353.091	9.20624	345.205	0	0	0	0	45.5516	18.7204	104.478	2.32795	1.69463	0.634262	2.09349	1.27675	0.788728	0.19194
Upper quartile	Bonaire, Sint Eustatius and Saba	BES	HIC	Americas	Latin America and the Caribbean	Caribbean	Latin America	26103.4	0.373719	19411.7	19268.4	17842.6	1561.86	0	0	1561.86	17842.6	215.179	0	19461.2	16.8636	19447	215.179	19303.2	21.5972	19278.1	17842.6	1573.74	0	17842.6	0	0	1573.74	12.502	1561.86	0	0	0	0	137.74	62.8746	245.205	2.96756	2.16072	0.808969	3.05261	1.88098	1.15473	0.291784
Max	Bonaire, Sint Eustatius and Saba	BES	HIC	Americas	Latin America and the Caribbean	Caribbean	Latin America	26103.4	0.373719	26950.3	26847	26761.4	8706.21	0	0	8706.21	26761.4	1029.81	0	26997.9	38.6085	26976.1	1029.81	26872.8	68.1004	26850.1	26761.4	8720.81	0	26761.4	0	0	8720.81	16.7849	8706.21	0	0	0	0	843.208	564.665	1062.86	6.51591	4.66476	1.85115	15.8933	11.5298	4.96426	0.680896
Mean	Burkina Faso	BFA	LIC	Africa	Sub-Saharan Africa	Western Africa	Other Africa	2.15042e+07	0.505432	3.07917e+06	1.00254e+06	1.00254e+06	0	0	0	0	0	2.07662e+06	1.00254e+06	3.33588e+06	60293.8	3.27559e+06	2.07662e+06	1.19896e+06	15293.9	1.18367e+06	1.00254e+06	181127	1.00254e+06	0	0	0	181127	181127	0	810936	191607	810107	829.394	1.52169e+06	554927	3.15475e+06	10553.1	7681.13	2871.97	1233.38	516.068	717.311	55118.2
Min	Burkina Faso	BFA	LIC	Africa	Sub-Saharan Africa	Western Africa	Other Africa	2.15042e+07	0.505432	2.4051e+06	681624	681624	0	0	0	0	0	1.67924e+06	681624	2.66962e+06	51308.4	2.61724e+06	1.67924e+06	847929	9797.03	837011	681624	116968	681624	0	0	0	116968	116968	0	527756	103539	527127	439.932	1.20926e+06	393141	2.47116e+06	8994.37	6556.47	2434.27	722.177	303.261	399.372	34159.2
Lower quartile	Burkina Faso	BFA	LIC	Africa	Sub-Saharan Africa	Western Africa	Other Africa	2.15042e+07	0.505432	2.87779e+06	905381	905381	0	0	0	0	0	1.9619e+06	905381	3.12874e+06	57882.8	3.07087e+06	1.9619e+06	1.09819e+06	13409.1	1.08378e+06	905381	159635	905381	0	0	0	159635	159635	0	723738	154346	722965	663.937	1.43518e+06	495422	2.94936e+06	10123.7	7368.32	2753.45	1040.15	425.451	599.738	47159.7
Median	Burkina Faso	BFA	LIC	Africa	Sub-Saharan Africa	Western Africa	Other Africa	2.15042e+07	0.505432	3.07869e+06	996544	996544	0	0	0	0	0	2.07393e+06	996544	3.33617e+06	60297.1	3.27602e+06	2.07393e+06	1.19411e+06	14933.4	1.17916e+06	996544	177575	996544	0	0	0	177575	177575	0	802377	180507	801544	771.555	1.51384e+06	543453	3.15461e+06	10536.2	7671.95	2866.66	1190.24	493.2	687.219	53087
Upper quartile	Burkina Faso	BFA	LIC	Africa	Sub-Saharan Africa	Western Africa	Other Africa	2.15042e+07	0.505432	3.26965e+06	1.09958e+06	1.09958e+06	0	0	0	0	0	2.18538e+06	1.09958e+06	3.52955e+06	62570.7	3.46737e+06	2.18538e+06	1.29722e+06	16834	1.28042e+06	1.09958e+06	198700	1.09958e+06	0	0	0	198700	198700	0	890973	218537	890040	941.127	1.60103e+06	604920	3.34879e+06	10976.3	7985.63	2985.53	1390.31	581.091	808.416	60970.6
Max	Burkina Faso	BFA	LIC	Africa	Sub-Saharan Africa	Western Africa	Other Africa	2.15042e+07	0.505432	3.87506e+06	1.43953e+06	1.43953e+06	0	0	0	0	0	2.58786e+06	1.43953e+06	4.15793e+06	71818.1	4.08967e+06	2.58786e+06	1.64674e+06	28342.8	1.6245e+06	1.43953e+06	299852	1.43953e+06	0	0	0	299852	299852	0	1.26824e+06	444209	1.26719e+06	2234.11	1.95471e+06	866254	3.96594e+06	12752.7	9344.3	3468.16	2556.23	1399.18	1518.24	109801
Mean	Bangladesh	BGD	LMC	Asia	Southern Asia	NA	Other non-OECD Asia	1.67132e+08	0.0199364	3.3719e+07	1.76491e+07	1.76421e+07	0	7067.11	0	7067.11	0	1.60698e+07	1.76421e+07	3.90372e+07	311258	3.87259e+07	1.60698e+07	2.26561e+07	207432	2.24487e+07	1.76421e+07	4.80661e+06	1.76421e+07	0	7067.11	0	4.79955e+06	4.79955e+06	0	1.42749e+07	3.36723e+06	1.42602e+07	14657	9.20529e+06	6.86452e+06	3.42306e+07	54467.9	39644.1	14823.8	17321.4	7238.39	10083	1.45848e+06
Min	Bangladesh	BGD	LMC	Asia	Southern Asia	NA	Other non-OECD Asia	1.67132e+08	0.0199364	3.13369e+07	1.60911e+07	1.60836e+07	0	6446	0	6446	0	1.45223e+07	1.60836e+07	3.65551e+07	285188	3.62635e+07	1.45223e+07	2.09108e+07	185782	2.07177e+07	1.60836e+07	4.20715e+06	1.60836e+07	0	6446	0	4.20069e+06	4.20069e+06	0	1.28197e+07	2.79836e+06	1.28065e+07	11786.3	7.89217e+06	5.72764e+06	3.18121e+07	49794.4	36166.8	13627.6	14507.6	5929.74	8577.85	1.25122e+06
Lower quartile	Bangladesh	BGD	LMC	Asia	Southern Asia	NA	Other non-OECD Asia	1.67132e+08	0.0199364	3.33247e+07	1.73189e+07	1.73119e+07	0	6609.23	0	6609.23	0	1.57635e+07	1.73119e+07	3.86157e+07	306766	3.83062e+07	1.57635e+07	2.23097e+07	202733	2.21055e+07	1.73119e+07	4.68375e+06	1.73119e+07	0	6609.23	0	4.67655e+06	4.67655e+06	0	1.3996e+07	3.24599e+06	1.39817e+07	14094.9	8.94435e+06	6.63969e+06	3.38325e+07	53679.5	39064.4	14608.9	16775.9	6992.72	9757.99	1.41125e+06
Median	Bangladesh	BGD	LMC	Asia	Southern Asia	NA	Other non-OECD Asia	1.67132e+08	0.0199364	3.37193e+07	1.76428e+07	1.76359e+07	0	6926.34	0	6926.34	0	1.60575e+07	1.76359e+07	3.90295e+07	311147	3.87183e+07	1.60575e+07	2.26498e+07	207337	2.24421e+07	1.76359e+07	4.80227e+06	1.76359e+07	0	6926.34	0	4.79521e+06	4.79521e+06	0	1.42661e+07	3.3598e+06	1.42521e+07	14621.8	9.18366e+06	6.85842e+06	3.42304e+07	54447.7	39631.3	14819.2	17297.1	7223.56	10062.4	1.4556e+06
Upper quartile	Bangladesh	BGD	LMC	Asia	Southern Asia	NA	Other non-OECD Asia	1.67132e+08	0.0199364	3.4113e+07	1.79641e+07	1.79574e+07	0	7361.22	0	7361.22	0	1.63708e+07	1.79574e+07	3.9454e+07	315634	3.9139e+07	1.63708e+07	2.29973e+07	211812	2.27886e+07	1.79574e+07	4.92584e+06	1.79574e+07	0	7361.22	0	4.91862e+06	4.91862e+06	0	1.45481e+07	3.48054e+06	1.4533e+07	15180.6	9.46359e+06	7.08748e+06	3.46278e+07	55250.9	40212.5	15035.4	17852.8	7475.27	10391.2	1.5019e+06
Max	Bangladesh	BGD	LMC	Asia	Southern Asia	NA	Other non-OECD Asia	1.67132e+08	0.0199364	3.57331e+07	1.95828e+07	1.95757e+07	0	10868.5	0	10868.5	0	1.7869e+07	1.95757e+07	4.13757e+07	336272	4.10419e+07	1.7869e+07	2.46747e+07	234877	2.44519e+07	1.95757e+07	5.44618e+06	1.95757e+07	0	10868.5	0	5.43932e+06	5.43932e+06	0	1.58838e+07	4.02602e+06	1.58677e+07	18863.5	1.09102e+07	8.1876e+06	3.62716e+07	59168	43003.8	16164.3	20162.9	8550.51	12015.8	1.72254e+06
Mean	Bulgaria	BGR	UMC	Europe	Eastern Europe	NA	Other EU	6.96511e+06	0.398961	2.48989e+06	2.02688e+06	2.01747e+06	9401.53	0	0	9401.53	1.99575e+06	463010	21726.2	2.66382e+06	13874	2.64995e+06	463010	2.18694e+06	11171.9	2.17577e+06	2.01747e+06	158294	21726.2	1.99575e+06	0	0	158294	148892	9401.53	17579.5	4146.67	17561.4	18.0636	117889	345121	509782	2427.81	1766.98	660.83	1220.89	542.281	678.608	45147.1
Min	Bulgaria	BGR	UMC	Europe	Eastern Europe	NA	Other EU	6.96511e+06	0.398961	2.2848e+06	1.86282e+06	1.85342e+06	5241.38	0	0	5241.38	1.83272e+06	415802	16204.2	2.4092e+06	12425.6	2.39668e+06	415802	1.9747e+06	8603.9	1.96461e+06	1.85342e+06	80561.5	16204.2	1.83272e+06	0	0	80561.5	71864.5	5241.38	13443.8	2760.41	13430.8	11.0258	99195.4	302731	460090	2162.22	1573.8	587.212	819.821	362.231	457.59	20020.9
Lower quartile	Bulgaria	BGR	UMC	Europe	Eastern Europe	NA	Other EU	6.96511e+06	0.398961	2.45032e+06	1.99522e+06	1.98583e+06	8080.29	0	0	8080.29	1.9646e+06	452065	20694.2	2.61792e+06	13593.3	2.60429e+06	452065	2.14796e+06	10609.2	2.13697e+06	1.98583e+06	133160	20694.2	1.9646e+06	0	0	133160	124221	8080.29	16722.3	3822.91	16705.4	16.6322	114168	336479	498151	2377.92	1730.85	647.014	1137.13	504.263	631.907	36534.1
Median	Bulgaria	BGR	UMC	Europe	Eastern Europe	NA	Other EU	6.96511e+06	0.398961	2.48894e+06	2.0258e+06	2.01651e+06	9161.18	0	0	9161.18	1.9948e+06	462760	21701.3	2.66137e+06	13870.7	2.64754e+06	462760	2.18394e+06	11127.5	2.17268e+06	2.01651e+06	152800	21701.3	1.9948e+06	0	0	152800	143302	9161.18	17563.7	4118.15	17545	17.9408	117810	345040	509610	2427.81	1767.28	660.473	1211.65	537.709	673.438	42730.7
Upper quartile	Bulgaria	BGR	UMC	Europe	Eastern Europe	NA	Other EU	6.96511e+06	0.398961	2.52786e+06	2.05776e+06	2.04802e+06	10529.3	0	0	10529.3	2.02605e+06	473576	22708.3	2.70776e+06	14141.8	2.69378e+06	473576	2.22503e+06	11672.7	2.21362e+06	2.04802e+06	177827	22708.3	2.02605e+06	0	0	177827	168479	10529.3	18390.9	4434.81	18371.6	19.3419	121478	353328	521093	2475.97	1802.52	674.27	1296.38	576.565	720.024	51301.8
Max	Bulgaria	BGR	UMC	Europe	Eastern Europe	NA	Other EU	6.96511e+06	0.398961	2.70757e+06	2.211e+06	2.20188e+06	17981.1	0	0	17981.1	2.1776e+06	519604	27913.8	2.93266e+06	15511	2.91807e+06	519604	2.43714e+06	15495.3	2.42445e+06	2.20188e+06	297347	27913.8	2.1776e+06	0	0	297347	286248	17981.1	22332.5	5996.19	22310.3	26.3616	137663	389060	570333	2705.06	1971.07	735.215	1907.06	855.193	1051.87	135513
Mean	Bahrain	BHR	HIC	Asia	Western Asia	NA	Middle East and North Africa	1.41665e+06	0.0206063	568783	568783	540344	28439.2	0	0	28439.2	540344	0	0	569885	114.909	569770	0	569770	189.647	569581	540344	29236.5	0	540344	0	0	29236.5	797.317	28439.2	0	0	0	0	0	0	304.557	20.133	14.6545	5.47848	25.4128	15.6589	9.75381	18.4595
Min	Bahrain	BHR	HIC	Asia	Western Asia	NA	Middle East and North Africa	1.41665e+06	0.0206063	568783	568783	540344	28439.2	0	0	28439.2	540344	0	0	569103	16.8463	569057	0	569057	12.2643	569017	540344	28672.8	0	540344	0	0	28672.8	233.639	28439.2	0	0	0	0	0	0	35.3552	2.7963	2.0452	0.751103	1.64342	1.04442	0.516433	0.664781
Lower quartile	Bahrain	BHR	HIC	Asia	Western Asia	NA	Middle East and North Africa	1.41665e+06	0.0206063	568783	568783	540344	28439.2	0	0	28439.2	540344	0	0	569603	69.7295	569492	0	569492	93.5	569307	540344	28962.6	0	540344	0	0	28962.6	523.459	28439.2	0	0	0	0	0	0	169.916	12.1541	8.81974	3.29305	12.529	7.59812	4.51284	10.1168
Median	Bahrain	BHR	HIC	Asia	Western Asia	NA	Middle East and North Africa	1.41665e+06	0.0206063	568783	568783	540344	28439.2	0	0	28439.2	540344	0	0	569889	104.322	569775	0	569775	153.452	569590	540344	29245.6	0	540344	0	0	29245.6	806.392	28439.2	0	0	0	0	0	0	260.273	18.1556	13.2226	4.93533	20.5626	12.4905	7.70065	16.6038
Upper quartile	Bahrain	BHR	HIC	Asia	Western Asia	NA	Middle East and North Africa	1.41665e+06	0.0206063	568783	568783	540344	28439.2	0	0	28439.2	540344	0	0	570146	149.97	570034	0	570034	251.407	569849	540344	29505.1	0	540344	0	0	29505.1	1065.89	28439.2	0	0	0	0	0	0	397.123	26.3536	19.2649	7.16486	33.6885	20.5936	12.6883	25.4603
Max	Bahrain	BHR	HIC	Asia	Western Asia	NA	Middle East and North Africa	1.41665e+06	0.0206063	568783	568783	540344	28439.2	0	0	28439.2	540344	0	0	571382	347.098	571083	0	571083	1123.76	570227	540344	29882.9	0	540344	0	0	29882.9	1443.77	28439.2	0	0	0	0	0	0	1447.19	63.6082	46.7832	17.3	150.584	93.2951	58.5725	57.4525
Mean	Bahamas	BHS	HIC	Americas	Latin America and the Caribbean	Caribbean	Latin America	403234	0.172791	237396	236080	215083	20996.7	0	0	20996.7	215083	1316.14	0	237872	141.824	237730	1316.14	236414	143.307	236271	215083	21187.8	0	215083	0	0	21187.8	191.052	20996.7	0	0	0	0	875.144	440.991	1601.27	24.836	18.0761	6.75993	20.3881	12.5913	7.79676	4.45051
Min	Bahamas	BHS	HIC	Americas	Latin America and the Caribbean	Caribbean	Latin America	403234	0.172791	89182.3	89043.1	81506.4	804.867	0	0	804.867	81506.4	3.693	0	89529.1	67.4722	89450.3	3.693	89311.1	55.6773	89214.8	81506.4	901.083	0	81506.4	0	0	901.083	60.16	804.867	0	0	0	0	1.32527	1.21101	176.527	10.9818	7.97811	3.00371	6.86952	3.96422	2.30009	0.31931
Lower quartile	Bahamas	BHS	HIC	Americas	Latin America and the Caribbean	Caribbean	Latin America	403234	0.172791	179915	178976	161928	5836.32	0	0	5836.32	161928	234.943	0	180363	115.156	180255	234.943	179327	109.015	179193	161928	6060.89	0	161928	0	0	6060.89	132.714	5836.32	0	0	0	0	150.571	71.7421	512.851	20.1216	14.6645	5.47177	14.6473	8.97913	5.57709	2.6612
Median	Bahamas	BHS	HIC	Americas	Latin America and the Caribbean	Caribbean	Latin America	403234	0.172791	233363	231653	208196	11152	0	0	11152	208196	448.133	0	233749	136.187	233592	448.133	231985	133.508	231851	208196	11333.5	0	208196	0	0	11333.5	192.951	11152	0	0	0	0	293.157	142.148	745.966	23.7431	17.2809	6.47105	18.5052	11.3339	7.01517	4.0704
Upper quartile	Bahamas	BHS	HIC	Americas	Latin America and the Caribbean	Caribbean	Latin America	403234	0.172791	292653	290700	264033	30043.7	0	0	30043.7	264033	1101.39	0	293272	162.376	293081	1101.39	291050	165.628	290934	264033	30228.2	0	264033	0	0	30228.2	247.807	30043.7	0	0	0	0	760.304	365.085	1404.39	28.3377	20.6124	7.72049	23.8088	14.6768	9.0403	5.91767
Max	Bahamas	BHS	HIC	Americas	Latin America and the Caribbean	Caribbean	Latin America	403234	0.172791	441617	433175	426686	129129	0	0	129129	426686	16815.4	0	442285	355.398	442011	16815.4	433569	439.619	433361	426686	129406	0	426686	0	0	129406	329.73	129129	0	0	0	0	14909.8	8623.71	17146.6	60.8996	44.0971	16.8025	96.7917	56.5219	40.2698	14.0544
Mean	Bosnia and Herzegovina	BIH	UMC	Europe	Southern Europe	NA	Other Eurasia	3.31424e+06	0.485653	1.00004e+06	733255	732326	0	928.605	0	928.605	723810	266781	8516.6	1.07318e+06	6839.21	1.06634e+06	266781	799562	5351.48	794211	732326	61884.5	8516.6	723810	928.605	0	60955.9	60955.9	0	6888.91	1627.69	6881.84	7.07015	73773	193008	287488	1197.08	871.305	325.778	645.167	286.511	358.656	18525.8
Min	Bosnia and Herzegovina	BIH	UMC	Europe	Southern Europe	NA	Other Eurasia	3.31424e+06	0.485653	867542	631458	630530	0	928.605	0	928.605	622803	218198	5738.63	935836	5789.07	929840	218198	693756	3983.9	688954	630530	38913.5	5738.63	622803	928.605	0	37984.9	37984.9	0	4658.22	891.377	4653.17	4.05833	54009.7	161294	236479	1005.9	734.375	271.523	420.035	184.263	231.392	10410.9
Lower quartile	Bosnia and Herzegovina	BIH	UMC	Europe	Southern Europe	NA	Other Eurasia	3.31424e+06	0.485653	974074	714724	713795	0	928.605	0	928.605	705561	256923	7882.96	1.04676e+06	6632.01	1.04006e+06	256923	779962	5047.51	774807	713795	55255.4	7882.96	705561	928.605	0	54326.8	54326.8	0	6367.85	1453.73	6361.36	6.31227	69986.9	185397	277193	1160.18	844.653	315.629	594.388	264.128	330.293	16052.3
Median	Bosnia and Herzegovina	BIH	UMC	Europe	Southern Europe	NA	Other Eurasia	3.31424e+06	0.485653	999266	732373	731444	0	928.605	0	928.605	723150	266460	8463.82	1.07268e+06	6836.38	1.06578e+06	266460	799279	5338.32	793982	731444	60873.5	8463.82	723150	928.605	0	59944.9	59944.9	0	6836.69	1606.21	6829.96	6.9937	73601.7	192769	287082	1196.31	870.628	325.673	641.086	284.507	355.939	17985.7
Upper quartile	Bosnia and Herzegovina	BIH	UMC	Europe	Southern Europe	NA	Other Eurasia	3.31424e+06	0.485653	1.02485e+06	751328	750400	0	928.605	0	928.605	741620	276157	9097.11	1.0992e+06	7034.65	1.09235e+06	276157	818873	5633.15	813370	750400	67708.8	9097.11	741620	928.605	0	66780.2	66780.2	0	7375.39	1779.3	7367.51	7.7078	77261.3	200412	297543	1233.38	897.566	335.663	692.043	306.896	385.024	20465.7
Max	Bosnia and Herzegovina	BIH	UMC	Europe	Southern Europe	NA	Other Eurasia	3.31424e+06	0.485653	1.13424e+06	832122	831194	0	928.605	0	928.605	821571	329489	12364.2	1.22471e+06	8036.46	1.21673e+06	329489	918240	7147.83	912279	831194	101123	12364.2	821571	928.605	0	100195	100195	0	9970.97	2706.49	9964.39	12.9314	97870.4	241112	352107	1414.96	1026.33	388.634	947.904	412.957	534.947	36833
Mean	Saint-Barthélemy	BLM	HIC	Americas	Latin America and the Caribbean	Caribbean	OECD EU countries	10642.8	0.127701	4466.02	4437.76	3863.21	574.551	0	0	574.551	3863.21	28.2585	0	4480.01	3.93555	4476.08	28.2585	4447.82	4.77565	4443.05	3863.21	579.834	0	3863.21	0	0	579.834	5.28385	574.551	0	0	0	0	18.8312	9.42738	36.9697	0.689202	0.501689	0.187513	0.599968	0.371012	0.228956	0.120589
Min	Saint-Barthélemy	BLM	HIC	Americas	Latin America and the Caribbean	Caribbean	OECD EU countries	10642.8	0.127701	1515.01	1515.01	1033.96	0	0	0	0	1033.96	0	0	1519.53	0.748145	1518.55	0	1518.55	0.328021	1516.76	1033.96	1.58584	0	1033.96	0	0	1.58584	1.51951	0	0	0	0	0	0	0	1.13213	0.124397	0.0908563	0.0335405	0.0200369	0.0124227	0.00473746	0.00473548
Lower quartile	Saint-Barthélemy	BLM	HIC	Americas	Latin America and the Caribbean	Caribbean	OECD EU countries	10642.8	0.127701	3496.17	3457.33	2862.74	0	0	0	0	2862.74	0	0	3501.19	2.47617	3499.85	0	3464.43	2.46127	3461.89	2862.74	8.87526	0	2862.74	0	0	8.87526	3.46208	0	0	0	0	0	0	0	6.09123	0.429408	0.313525	0.116423	0.270469	0.16425	0.0982701	0.0659357
Median	Saint-Barthélemy	BLM	HIC	Americas	Latin America and the Caribbean	Caribbean	OECD EU countries	10642.8	0.127701	4311.95	4273.1	3690.41	353.081	0	0	353.081	3690.41	0	0	4322.73	3.48543	4319.77	0	4285.53	3.90115	4279.63	3690.41	357.356	0	3690.41	0	0	357.356	5.28246	353.081	0	0	0	0	0	0	10.066	0.609475	0.444158	0.166193	0.468124	0.286083	0.175301	0.109224
Upper quartile	Saint-Barthélemy	BLM	HIC	Americas	Latin America and the Caribbean	Caribbean	OECD EU countries	10642.8	0.127701	5283.11	5244.26	4661.56	951.023	0	0	951.023	4661.56	56.7157	0	5295.33	4.91252	5291.6	56.7157	5253.55	6.15585	5248.43	4661.56	954.242	0	4661.56	0	0	954.242	7.09473	951.023	0	0	0	0	32.3743	8.29093	62.5093	0.858411	0.625954	0.234677	0.784549	0.486706	0.29926	0.164683
Max	Saint-Barthélemy	BLM	HIC	Americas	Latin America and the Caribbean	Caribbean	OECD EU countries	10642.8	0.127701	8818.13	8779.28	8701.59	4218.16	0	0	4218.16	8701.59	367.098	0	8845.23	18.8557	8833.85	367.098	8798.79	29.2403	8787.49	8701.59	4223.15	0	8701.59	0	0	4223.15	9.59578	4218.16	0	0	0	0	339.067	240.955	396.694	3.40845	2.5268	0.905493	5.61506	3.75361	2.48961	0.367207
Mean	Belarus	BLR	UMC	Europe	Eastern Europe	NA	Other Eurasia	9.63599e+06	0.259207	4.34664e+06	3.84268e+06	3.83813e+06	4541.41	0	0	4541.41	3.77731e+06	503966	60823	4.63397e+06	15187.3	4.61878e+06	503966	4.11481e+06	16340.8	4.09847e+06	3.83813e+06	260337	60823	3.77731e+06	0	0	260337	255795	4541.41	49229.6	11593.5	49178.7	50.8999	142277	361689	596317	2657.79	1934.38	723.413	1623.52	720.772	902.747	77782.4
Min	Belarus	BLR	UMC	Europe	Eastern Europe	NA	Other Eurasia	9.63599e+06	0.259207	3.89442e+06	3.42328e+06	3.4203e+06	1559.21	0	0	1559.21	3.35959e+06	420900	53478.5	4.14961e+06	12901.9	4.13516e+06	420900	3.65782e+06	11958.2	3.63928e+06	3.4203e+06	129421	53478.5	3.35959e+06	0	0	129421	123730	1559.21	27216.3	3256.64	27174	15.7672	116289	301163	508010	2236.43	1629.84	606.586	1163.87	507.756	648.142	32094.2
Lower quartile	Belarus	BLR	UMC	Europe	Eastern Europe	NA	Other Eurasia	9.63599e+06	0.259207	4.24746e+06	3.75164e+06	3.74705e+06	3492.71	0	0	3492.71	3.68661e+06	487787	59398.6	4.52378e+06	14686.4	4.50915e+06	487787	4.01407e+06	15225.2	3.99816e+06	3.74705e+06	218985	59398.6	3.68661e+06	0	0	218985	214152	3492.71	45866.7	7599.38	45821.3	32.8863	135985	349225	578792	2568.9	1869.42	699.164	1495.81	664.034	831.051	63033.9
Median	Belarus	BLR	UMC	Europe	Eastern Europe	NA	Other Eurasia	9.63599e+06	0.259207	4.34605e+06	3.84219e+06	3.83738e+06	4355.11	0	0	4355.11	3.7771e+06	503115	60715.5	4.63339e+06	15150.5	4.61807e+06	503115	4.11298e+06	16206.6	4.09713e+06	3.83738e+06	252742	60715.5	3.7771e+06	0	0	252742	247969	4355.11	50093.6	10607.6	50041.9	46.277	141909	360839	595477	2651.51	1929.52	722.019	1609.85	713.632	894.279	74471.3
Upper quartile	Belarus	BLR	UMC	Europe	Eastern Europe	NA	Other Eurasia	9.63599e+06	0.259207	4.44533e+06	3.93417e+06	3.92939e+06	5404.7	0	0	5404.7	3.86851e+06	519540	62166.9	4.74134e+06	15684.4	4.72568e+06	519540	4.21413e+06	17309.5	4.19732e+06	3.92939e+06	293507	62166.9	3.86851e+06	0	0	293507	289499	5404.7	53315.9	14694.2	53262.7	63.6458	148136	374041	613228	2746.67	1998.17	747.874	1737.77	770.818	966.839	88644.4
Max	Belarus	BLR	UMC	Europe	Eastern Europe	NA	Other Eurasia	9.63599e+06	0.259207	4.81133e+06	4.28846e+06	4.28559e+06	13581	0	0	13581	4.22682e+06	588910	68900.1	5.22886e+06	18015.8	5.21305e+06	588910	4.69228e+06	23031.2	4.67431e+06	4.28559e+06	489913	68900.1	4.22682e+06	0	0	489913	486253	13581	61716.3	32209	61669.4	170.588	182717	425235	685919	3196.12	2324.96	871.154	2400.33	1108	1308.37	189179
Mean	Belize	BLZ	UMC	Americas	Latin America and the Caribbean	Central America	Latin America	393219	0.439598	245564	186460	186460	0	0	0	0	184985	59103.5	1474.98	255648	1254.87	254393	59103.5	195289	948.627	194341	186460	7880.45	1474.98	184985	0	0	7880.45	7880.45	0	1191	283.981	1189.78	1.21899	17405.9	41697.6	62782	219.638	159.833	59.8049	138.21	61.3288	76.8808	2394.84
Min	Belize	BLZ	UMC	Americas	Latin America and the Caribbean	Central America	Latin America	393219	0.439598	185999	130936	130936	0	0	0	0	130061	37106.2	117.179	197461	890.709	196548	37106.2	136141	298.792	135453	130936	1324.07	117.179	130061	0	0	1324.07	1324.07	0	99.0982	12.2514	99.0178	0.0763932	7929.99	24708.1	39415.2	152.33	110.8	41.5295	45.1003	19.763	25.3373	473.233
Lower quartile	Belize	BLZ	UMC	Americas	Latin America and the Caribbean	Central America	Latin America	393219	0.439598	233741	175351	175351	0	0	0	0	174046	52948.1	1042.86	244062	1183.63	242857	52948.1	183902	807.799	183047	175351	5839.6	1042.86	174046	0	0	5839.6	5839.6	0	831.043	161.281	830.324	0.679367	14637.6	37151.3	56543.3	206.167	150.208	55.9664	112.704	50.0624	62.4496	1676.69
Median	Belize	BLZ	UMC	Americas	Latin America and the Caribbean	Central America	Latin America	393219	0.439598	249364	188905	188905	0	0	0	0	187468	57857.3	1407.59	259416	1258.31	258154	57857.3	197662	936.302	196716	188905	7456.32	1407.59	187468	0	0	7456.32	7456.32	0	1136.27	249.631	1134.94	1.05504	16957.5	40854.1	61652.2	219.652	159.835	59.7691	135.007	59.7164	75.0134	2213.81
Upper quartile	Belize	BLZ	UMC	Americas	Latin America and the Caribbean	Central America	Latin America	393219	0.439598	259185	198773	198773	0	0	0	0	197083	64156.8	1847.96	269498	1327.16	268214	64156.8	207633	1080.6	206634	198773	9591.15	1847.96	197083	0	0	9591.15	9591.15	0	1492.62	368.269	1491.7	1.59604	19595.6	45417.6	67908.6	233.227	169.655	63.6296	160.256	71.0329	88.8916	2956.95
Max	Belize	BLZ	UMC	Americas	Latin America and the Caribbean	Central America	Latin America	393219	0.439598	304802	236966	236966	0	0	0	0	236416	98762.4	4504.4	315004	1623.7	313523	98762.4	248045	1829.79	246602	236966	20487.8	4504.4	236416	0	0	20487.8	20487.8	0	3584.77	1248.95	3583.09	6.58119	36544.8	70271.5	103153	299.639	218.345	83.0811	369.104	150.124	218.98	7559.29
Mean	Bermuda	BMU	HIC	Americas	Northern America	NA	Latin America	63557.6	0.0153196	33265.8	33265.8	22828.2	10330.8	106.694	0	10437.5	22828.2	0	0	33353.2	29.938	33323.2	0	33323.2	21.7899	33301.4	22828.2	10473.2	0	22828.2	106.694	0	10366.5	35.6669	10330.8	0	0	0	0	0	0	51.7279	5.23542	3.81005	1.42537	2.49921	1.54005	0.959157	0.821391
Min	Bermuda	BMU	HIC	Americas	Northern America	NA	Latin America	63557.6	0.0153196	17193.7	17193.7	11639.4	4039.31	0	0	4181.15	11639.4	0	0	17252.1	12.206	17239.9	0	17239.9	8.00723	17230.2	11639.4	4216.36	0	11639.4	0	0	4074.51	19.7043	4039.31	0	0	0	0	0	0	21.9339	2.10542	1.51906	0.586365	0.856118	0.569099	0.287019	0.353808
Lower quartile	Bermuda	BMU	HIC	Americas	Northern America	NA	Latin America	63557.6	0.0153196	29910.8	29910.8	20198.8	8789.48	17.6251	0	8890.55	20198.8	0	0	29996.2	25.4957	29969.8	0	29969.8	17.7641	29949.7	20198.8	8925.21	0	20198.8	17.6251	0	8825.35	32.2164	8789.48	0	0	0	0	0	0	43.7029	4.45082	3.23703	1.209	1.95117	1.20013	0.738888	0.713466
Median	Bermuda	BMU	HIC	Americas	Northern America	NA	Latin America	63557.6	0.0153196	33142	33142	22648.6	10233.7	69.796	0	10338.1	22648.6	0	0	33230.7	29.3519	33201.1	0	33201.1	21.0569	33178.6	22648.6	10373.6	0	22648.6	69.796	0	10268.3	35.6905	10233.7	0	0	0	0	0	0	50.5836	5.13858	3.73578	1.39661	2.37902	1.45714	0.910019	0.813607
Upper quartile	Bermuda	BMU	HIC	Americas	Northern America	NA	Latin America	63557.6	0.0153196	36400	36400	25262.3	11784	160.285	0	11866	25262.3	0	0	36486.6	33.7402	36453.3	0	36453.3	25.0829	36436	25262.3	11903.8	0	25262.3	160.285	0	11820.1	39.0334	11784	0	0	0	0	0	0	58.4542	5.89477	4.29808	1.60773	2.90913	1.79933	1.11925	0.923519
Max	Bermuda	BMU	HIC	Americas	Northern America	NA	Latin America	63557.6	0.0153196	50869.8	50869.8	40552.6	18508.1	744.922	0	18577.8	40552.6	0	0	50967	56.2433	50921.3	0	50921.3	51.5602	50902.1	40552.6	18618	0	40552.6	744.922	0	18548.4	51.9152	18508.1	0	0	0	0	0	0	102.134	9.99761	7.28125	2.71637	8.07176	4.65836	3.4134	1.50111
Mean	Bolivia	BOL	LMC	Americas	Latin America and the Caribbean	South America	Latin America	1.19363e+07	0.286136	2.74301e+06	2.18515e+06	2.18003e+06	0	5118.36	0	5118.36	1.26552e+06	557859	914514	3.02219e+06	16099.9	3.00609e+06	557859	2.44823e+06	14148	2.43409e+06	2.18003e+06	254056	914514	1.26552e+06	5118.36	0	248937	248937	0	739934	174581	739171	762.762	310837	247022	1.50262e+06	2817.45	2050.58	766.874	1581.58	660.998	920.578	75716.3
Min	Bolivia	BOL	LMC	Americas	Latin America and the Caribbean	South America	Latin America	1.19363e+07	0.286136	2.0951e+06	1.62069e+06	1.61767e+06	0	2582.81	0	2582.81	948780	402112	517790	2.33168e+06	13253.3	2.31813e+06	402112	1.84098e+06	9825.47	1.82831e+06	1.61767e+06	136341	517790	948780	2582.81	0	133289	133289	0	388239	71002.7	387750	312.475	205259	167806	1.01467e+06	2298.97	1677.74	621.23	987.663	400.997	566.007	35570.3
Lower quartile	Bolivia	BOL	LMC	Americas	Latin America and the Caribbean	South America	Latin America	1.19363e+07	0.286136	2.58949e+06	2.04003e+06	2.03507e+06	0	3540.22	0	3540.22	1.18708e+06	510500	793224	2.86036e+06	15422.3	2.84474e+06	510500	2.29761e+06	12900.1	2.28364e+06	2.03507e+06	218200	793224	1.18708e+06	3540.22	0	213110	213110	0	630149	121243	629584	523.162	278426	221029	1.37098e+06	2698.32	1963.59	734.018	1398.83	580.944	809.834	62916
Median	Bolivia	BOL	LMC	Americas	Latin America and the Caribbean	South America	Latin America	1.19363e+07	0.286136	2.72184e+06	2.16588e+06	2.16078e+06	0	4405.85	0	4405.85	1.25888e+06	547861	885097	3.00258e+06	16019	2.98682e+06	547861	2.42621e+06	13924.9	2.41243e+06	2.16078e+06	248313	885097	1.25888e+06	4405.85	0	242952	242952	0	716018	158837	715214	677.201	303809	240602	1.46963e+06	2802.64	2040.33	762.989	1544.5	644.514	896.058	72791.2
Upper quartile	Bolivia	BOL	LMC	Americas	Latin America and the Caribbean	South America	Latin America	1.19363e+07	0.286136	2.88433e+06	2.31353e+06	2.30842e+06	0	5992.08	0	5992.08	1.33957e+06	593575	1.00723e+06	3.16872e+06	16654.4	3.15234e+06	593575	2.58333e+06	15151.7	2.56891e+06	2.30842e+06	285443	1.00723e+06	1.33957e+06	5992.08	0	279977	279977	0	826450	207696	825330	919.336	333982	265289	1.60979e+06	2919.06	2124.27	794.585	1724.49	720.964	1007.81	85643.3
Max	Bolivia	BOL	LMC	Americas	Latin America and the Caribbean	South America	Latin America	1.19363e+07	0.286136	3.44936e+06	2.88748e+06	2.88391e+06	0	18905.3	0	18905.3	1.66245e+06	931060	1.40989e+06	3.7846e+06	21370.3	3.76707e+06	931060	3.19284e+06	23604.6	3.17482e+06	2.88391e+06	477076	1.40989e+06	1.66245e+06	18905.3	0	467821	467821	0	1.3034e+06	653533	1.30269e+06	2881.98	598364	536645	2.06097e+06	3781.37	2767.21	1014.16	3177.73	1400.17	1857.05	166686
Mean	Brazil	BRA	UMC	Americas	Latin America and the Caribbean	South America	Latin America	2.13091e+08	0.20617	6.91163e+07	5.98699e+07	5.962e+07	84348.1	165611	0	249959	4.30337e+07	9.24636e+06	1.65863e+07	7.55969e+07	219317	7.53776e+07	9.24636e+06	6.61313e+07	204052	6.59272e+07	5.962e+07	6.30726e+06	1.65863e+07	4.30337e+07	165611	0	6.14165e+06	6.0573e+06	84348.1	1.34177e+07	3.16862e+06	1.34039e+07	13764.6	2.90324e+06	6.34311e+06	2.6256e+07	38380.2	27934.3	10445.9	24033.1	10670.6	13362.5	1.8392e+06
Min	Brazil	BRA	UMC	Americas	Latin America and the Caribbean	South America	Latin America	2.13091e+08	0.20617	6.62708e+07	5.74031e+07	5.7154e+07	63650.3	154076	0	223443	4.0523e+07	8.47813e+06	1.55721e+07	7.27947e+07	209443	7.25823e+07	8.47813e+06	6.34125e+07	188096	6.32215e+07	5.7154e+07	5.32849e+06	1.55721e+07	4.0523e+07	154076	0	5.16242e+06	5.07529e+06	63650.3	1.23415e+07	2.55537e+06	1.23288e+07	11080.5	2.56631e+06	5.8156e+06	2.5015e+07	36604.1	26616.7	9987.43	21655.6	9553.94	12101.7	1.4837e+06
Lower quartile	Brazil	BRA	UMC	Americas	Latin America and the Caribbean	South America	Latin America	2.13091e+08	0.20617	6.86094e+07	5.9383e+07	5.91353e+07	79451.4	161665	0	243659	4.2592e+07	9.0581e+06	1.63966e+07	7.50174e+07	217272	7.47999e+07	9.0581e+06	6.55649e+07	200178	6.53618e+07	5.91353e+07	6.02502e+06	1.63966e+07	4.2592e+07	161665	0	5.85868e+06	5.77406e+06	79451.4	1.32123e+07	3.00974e+06	1.3199e+07	13068.4	2.82219e+06	6.22248e+06	2.60187e+07	38019.6	27670.9	10346.7	23445.3	10409.4	13030.4	1.73633e+06
Median	Brazil	BRA	UMC	Americas	Latin America and the Caribbean	South America	Latin America	2.13091e+08	0.20617	6.91055e+07	5.98672e+07	5.96171e+07	83992.3	164626	0	249178	4.30272e+07	9.23671e+06	1.65909e+07	7.55975e+07	219208	7.53771e+07	9.23671e+06	6.61216e+07	203559	6.59153e+07	5.96171e+07	6.26772e+06	1.65909e+07	4.30272e+07	164626	0	6.10249e+06	6.02002e+06	83992.3	1.34307e+07	3.14955e+06	1.34166e+07	13687.1	2.89587e+06	6.3343e+06	2.62532e+07	38356.3	27916.7	10440.4	23957.4	10637.2	13316.9	1.82187e+06
Upper quartile	Brazil	BRA	UMC	Americas	Latin America and the Caribbean	South America	Latin America	2.13091e+08	0.20617	6.96003e+07	6.03467e+07	6.00994e+07	88856.8	168511	0	255372	4.34808e+07	9.41404e+06	1.67764e+07	7.61499e+07	221273	7.59299e+07	9.41404e+06	6.6674e+07	207469	6.64689e+07	6.00994e+07	6.55795e+06	1.67764e+07	4.34808e+07	168511	0	6.39221e+06	6.30901e+06	88856.8	1.3627e+07	3.30999e+06	1.36132e+07	14403.5	2.97696e+06	6.45211e+06	2.64953e+07	38721.5	28182.7	10538.7	24543	10893.4	13645.2	1.92399e+06
Max	Brazil	BRA	UMC	Americas	Latin America and the Caribbean	South America	Latin America	2.13091e+08	0.20617	7.23768e+07	6.32418e+07	6.29814e+07	113350	199112	0	295244	4.62758e+07	1.03693e+07	1.74944e+07	7.91414e+07	229732	7.89149e+07	1.03693e+07	6.92961e+07	237969	6.90796e+07	6.29814e+07	7.98791e+06	1.74944e+07	4.62758e+07	199112	0	7.8241e+06	7.7551e+06	113350	1.4566e+07	4.11862e+06	1.45515e+07	18284.2	3.43376e+06	7.14476e+06	2.74698e+07	40178.9	29244.8	10965.5	29081.7	12926.4	16155.3	2.47215e+06
Mean	Barbados	BRB	HIC	Americas	Latin America and the Caribbean	Caribbean	Latin America	279999	0.136772	156256	155641	144577	11064.3	0	0	11064.3	144577	614.42	0	156619	114.849	156504	614.42	155889	111.054	155778	144577	11201.5	0	144577	0	0	11201.5	137.237	11064.3	0	0	0	0	404.102	210.318	840.323	20.1119	14.6389	5.47302	14.7448	9.0892	5.6556	3.15207
Min	Barbados	BRB	HIC	Americas	Latin America and the Caribbean	Caribbean	Latin America	279999	0.136772	90871.4	90447.4	79723.2	98.698	0	0	98.698	79723.2	0	0	91146.4	56.4042	91061.5	0	90637.5	44.164	90543.7	79723.2	198.99	0	79723.2	0	0	198.99	68.8465	98.698	0	0	0	0	0	0	120.187	9.74423	7.11895	2.62528	5.04016	2.95103	1.87347	1.1547
Lower quartile	Barbados	BRB	HIC	Americas	Latin America and the Caribbean	Caribbean	Latin America	279999	0.136772	138638	137971	127095	5486.6	0	0	5486.6	127095	243.592	0	138988	99.0998	138880	243.592	138216	91.4966	138102	127095	5621.58	0	127095	0	0	5621.58	118.815	5486.6	0	0	0	0	157.507	68.8119	472.009	17.3846	12.6475	4.72847	11.8387	7.23207	4.48191	2.54194
Median	Barbados	BRB	HIC	Americas	Latin America and the Caribbean	Caribbean	Latin America	279999	0.136772	155256	154549	143538	9266.49	0	0	9266.49	143538	514.224	0	155621	112.778	155503	514.224	154780	108.12	154682	143538	9400.47	0	143538	0	0	9400.47	136.931	9266.49	0	0	0	0	328.897	157.008	741.907	19.7339	14.3659	5.36178	14.2094	8.74352	5.41884	3.07589
Upper quartile	Barbados	BRB	HIC	Americas	Latin America and the Caribbean	Caribbean	Latin America	279999	0.136772	173421	172778	160630	15105.6	0	0	15105.6	160630	876.888	0	173837	128.309	173690	876.888	173035	127.141	172921	160630	15225.5	0	160630	0	0	15225.5	155.292	15105.6	0	0	0	0	579.615	303.665	1112.03	22.4987	16.365	6.1335	17.0763	10.5169	6.57577	3.68654
Max	Barbados	BRB	HIC	Americas	Latin America and the Caribbean	Caribbean	Latin America	279999	0.136772	245978	245486	235881	45998.1	0	0	45998.1	235881	3426.51	0	246343	209.759	246240	3426.51	245748	299.748	245646	235881	46139	0	235881	0	0	46139	213.216	45998.1	0	0	0	0	3077.92	1713.03	3675.7	36.682	26.734	10.0193	50.4121	33.4313	16.9807	6.5588
Mean	Brunei	BRN	HIC	Asia	South-eastern Asia	NA	Other non-OECD Asia	440694	0.17968	293710	293710	256204	37349.4	157.247	0	37506.6	256204	0	0	294430	253.57	294176	0	294176	257.441	293919	256204	37715.1	0	256204	157.247	0	37557.8	208.41	37349.4	0	0	0	0	0	0	511.011	44.3718	32.2956	12.0763	37.4534	23.1193	14.334	4.79672
Min	Brunei	BRN	HIC	Asia	South-eastern Asia	NA	Other non-OECD Asia	440694	0.17968	103439	103439	88287.3	0	0	0	0	88287.3	0	0	103789	73.7431	103686	0	103686	52.7908	103590	88287.3	78.1618	0	88287.3	0	0	78.1618	65.9859	0	0	0	0	0	0	0	138.949	12.2276	8.97524	3.2524	5.28556	2.98094	1.5234	0.572594
Lower quartile	Brunei	BRN	HIC	Asia	South-eastern Asia	NA	Other non-OECD Asia	440694	0.17968	229259	229259	197170	11725.7	0	0	11879.4	197170	0	0	229835	193	229610	0	229610	174.957	229432	197170	12116.9	0	197170	0	0	11918.6	151.187	11725.7	0	0	0	0	0	0	378.392	33.5394	24.3756	9.14163	23.0747	14.187	8.54532	3.047
Median	Brunei	BRN	HIC	Asia	South-eastern Asia	NA	Other non-OECD Asia	440694	0.17968	288968	288968	247405	26026.5	0	0	26178.6	247405	0	0	289662	243.034	289438	0	289438	234.679	289181	247405	26383.2	0	247405	0	0	26263.9	209.229	26026.5	0	0	0	0	0	0	484.049	42.434	30.8827	11.5638	32.9742	20.2075	12.3371	4.42075
Upper quartile	Brunei	BRN	HIC	Asia	South-eastern Asia	NA	Other non-OECD Asia	440694	0.17968	353808	353808	311053	55572.5	0	0	55843.8	311053	0	0	354683	302.912	354341	0	354341	314.022	353941	311053	56068.4	0	311053	0	0	55729.4	265.425	55572.5	0	0	0	0	0	0	610.237	53.107	38.6482	14.4827	46.2721	28.314	17.7308	6.21388
Max	Brunei	BRN	HIC	Asia	South-eastern Asia	NA	Other non-OECD Asia	440694	0.17968	494255	494255	474088	185623	3556.45	0	185623	474088	0	0	495099	644.745	494781	0	494781	883.918	494470	474088	185863	0	474088	3556.45	0	185863	356.672	185623	0	0	0	0	0	0	1386.36	113.605	81.6072	31.9979	179.418	124.557	75.1412	13.2707
Mean	Bhutan	BTN	LMC	Asia	Southern Asia	NA	Other non-OECD Asia	807803	0.6898	121338	76153.4	74845.4	0	1307.95	0	1307.95	10847.3	45184.8	63998.1	130730	1460.34	129269	45184.8	84084.7	533.996	83550.7	74845.4	8705.27	63998.1	10847.3	1307.95	0	7397.32	7397.32	0	51774.1	12224	51721.2	52.9395	24427.8	20757	111177	255.585	186.025	69.5595	51.7097	21.6114	30.0982	2250.04
Min	Bhutan	BTN	LMC	Asia	Southern Asia	NA	Other non-OECD Asia	807803	0.6898	102163	65669.5	64386.5	0	1276.31	0	1276.31	10847.3	36494	53539.2	111225	1180.63	110045	36494	72329.3	391.789	71892.6	64386.5	4063.4	53539.2	10847.3	1276.31	0	2759.66	2759.66	0	40713.6	7197.15	40662.2	32.4281	18704.8	15571.1	91671.1	206.991	151.179	55.8117	34.3818	14.2486	20.0688	724.04
Lower quartile	Bhutan	BTN	LMC	Asia	Southern Asia	NA	Other non-OECD Asia	807803	0.6898	117675	73961.3	72654.4	0	1287.72	0	1287.72	10847.3	43362.3	61807.1	126630	1407.09	125225	43362.3	81443.2	500.131	80921	72654.4	7232.61	61807.1	10847.3	1287.72	0	5924.75	5924.75	0	49649.1	10782.3	49602.1	46.215	23222.2	19661.1	107420	246.08	179.059	66.9497	47.4246	19.5728	27.4208	1727.84
Median	Bhutan	BTN	LMC	Asia	Southern Asia	NA	Other non-OECD Asia	807803	0.6898	121220	76108.1	74802	0	1300.39	0	1300.39	10847.3	45104.4	63954.7	130608	1457.59	129142	45104.4	83971.3	531.826	83445.7	74802	8442	63954.7	10847.3	1300.39	0	7143.08	7143.08	0	51680	12007.5	51624.5	51.7922	24358.8	20682.7	111071	255.144	185.698	69.4182	51.3254	21.3789	29.9186	2123.13
Upper quartile	Bhutan	BTN	LMC	Asia	Southern Asia	NA	Other non-OECD Asia	807803	0.6898	124850	78203.5	76895.5	0	1321.49	0	1321.49	10847.3	46938.9	66048.2	134585	1512.14	133080	46938.9	86514.3	565.262	85958.3	76895.5	9921.41	66048.2	10847.3	1321.49	0	8612.92	8612.92	0	53894.3	13474	53838.3	58.1752	25535.8	21790.1	114747	264.75	192.687	72.0678	55.563	23.4496	32.4754	2640.82
Max	Bhutan	BTN	LMC	Asia	Southern Asia	NA	Other non-OECD Asia	807803	0.6898	139562	88102.3	86813.8	0	1447.41	0	1447.41	10847.3	55530.5	75966.5	151608	1770.6	149837	55530.5	100050	752.402	99428.1	86813.8	17653.3	75966.5	10847.3	1447.41	0	16375	16375	0	63000.6	20587.7	62951.9	94.9768	31180.9	27097	129758	309.808	225.137	84.6714	81.9229	34.8372	48.3585	6575.32
Mean	Botswana	BWA	UMC	Africa	Sub-Saharan Africa	Southern Africa	Other Africa	2.54716e+06	0.292818	888640	757561	757561	0	0	0	0	0	131079	757561	960478	4556.59	955921	131079	824842	3145.63	821697	757561	64135.3	757561	0	0	0	64135.3	64135.3	0	613081	144480	612453	627.963	41634.6	89444.1	896342	796.822	579.94	216.882	340.708	151.118	189.591	19567.2
Min	Botswana	BWA	UMC	Africa	Sub-Saharan Africa	Southern Africa	Other Africa	2.54716e+06	0.292818	489694	425369	425369	0	0	0	0	0	52092.9	425369	551431	2218.47	548948	52092.9	491786	1235.38	490365	425369	28531	425369	0	0	0	28531	28531	0	305702	43559.5	305442	216.821	16213.9	35035.8	493655	380.049	277.933	101.517	115.906	50.8383	65.0679	7474.25
Lower quartile	Botswana	BWA	UMC	Africa	Sub-Saharan Africa	Southern Africa	Other Africa	2.54716e+06	0.292818	764221	655844	655844	0	0	0	0	0	107768	655844	836674	3841.44	832737	107768	722375	2540.18	719286	655844	53519.6	655844	0	0	0	53519.6	53519.6	0	526559	110425	526106	475.705	32745.3	73152.8	770724	668.497	486.336	182.275	256.917	113.769	142.043	15662.2
Median	Botswana	BWA	UMC	Africa	Sub-Saharan Africa	Southern Africa	Other Africa	2.54716e+06	0.292818	872864	744470	744470	0	0	0	0	0	126703	744470	943894	4413.33	939427	126703	811639	3010.07	808480	744470	62695.1	744470	0	0	0	62695.1	62695.1	0	602023	135718	601543	594.002	39409.6	86398.6	880449	772.238	562.253	210.452	317.629	141.23	176.982	18912.4
Upper quartile	Botswana	BWA	UMC	Africa	Sub-Saharan Africa	Southern Africa	Other Africa	2.54716e+06	0.292818	996353	846488	846488	0	0	0	0	0	151357	846488	1.06898e+06	5208.59	1.0637e+06	151357	915423	3606.89	911552	846488	73216.9	846488	0	0	0	73216.9	73216.9	0	689482	170400	688733	734.6	48380.6	103431	1.00515e+06	910.52	663.241	247.563	401.078	177.847	223.364	22609.4
Max	Botswana	BWA	UMC	Africa	Sub-Saharan Africa	Southern Africa	Other Africa	2.54716e+06	0.292818	1.61087e+06	1.35661e+06	1.35661e+06	0	0	0	0	0	264361	1.35661e+06	1.69091e+06	8072.7	1.68284e+06	264361	1.42857e+06	6946.47	1.42326e+06	1.35661e+06	126649	1.35661e+06	0	0	0	126649	126649	0	1.05436e+06	439047	1.05322e+06	1779.8	105968	181811	1.62426e+06	1425.19	1038.26	395.208	1350.73	631.355	719.371	46554
Mean	Central African Republic	CAF	LIC	Africa	Sub-Saharan Africa	Middle Africa	Other Africa	5.34302e+06	0.430524	630226	173888	173888	0	0	0	0	0	456338	173888	699301	13421.3	685880	456338	229542	3914.99	225627	173888	51738.9	173888	0	0	0	51738.9	51738.9	0	140692	33196.3	140547	145.067	332022	124316	647562	2348.64	1709.52	639.114	370.598	155.054	215.544	15746
Min	Central African Republic	CAF	LIC	Africa	Sub-Saharan Africa	Middle Africa	Other Africa	5.34302e+06	0.430524	455610	115674	115674	0	0	0	0	0	331112	115674	509288	9968.5	499155	331112	163173	2278.34	159997	115674	30353.4	115674	0	0	0	30353.4	30353.4	0	90594.1	13793.7	90479.7	60.0607	236463	71225.5	468746	1698.42	1242.22	454.746	170.037	68.9441	97.1697	7902.08
Lower quartile	Central African Republic	CAF	LIC	Africa	Sub-Saharan Africa	Middle Africa	Other Africa	5.34302e+06	0.430524	590779	158914	158914	0	0	0	0	0	426793	158914	658363	12604.9	645591	426793	213024	3483.61	209347	158914	45113.2	158914	0	0	0	45113.2	45113.2	0	127505	27634.9	127385	119.874	308653	109899	607333	2203.97	1603.43	599.665	308.888	127.915	178.377	13310
Median	Central African Republic	CAF	LIC	Africa	Sub-Saharan Africa	Middle Africa	Other Africa	5.34302e+06	0.430524	625220	172038	172038	0	0	0	0	0	453070	172038	694251	13360.4	680677	453070	227630	3853.79	223794	172038	50822.8	172038	0	0	0	50822.8	50822.8	0	138803	31939	138670	139.177	329739	122227	642450	2341.49	1704.75	636.458	357.785	148.516	207.063	15172.1
Upper quartile	Central African Republic	CAF	LIC	Africa	Sub-Saharan Africa	Middle Africa	Other Africa	5.34302e+06	0.430524	664527	186409	186409	0	0	0	0	0	482940	186409	734356	14142.9	720294	482940	243720	4284.12	239503	186409	57343.6	186409	0	0	0	57343.6	57343.6	0	151808	37644.5	151683	163.685	353197	136546	682486	2475.9	1801.72	673.875	415.45	175.231	241.855	17762.9
Max	Central African Republic	CAF	LIC	Africa	Sub-Saharan Africa	Middle Africa	Other Africa	5.34302e+06	0.430524	860382	278018	278018	0	0	0	0	0	608729	278018	920257	18853.6	903902	608729	357831	7091.89	351725	278018	89359.1	278018	0	0	0	89359.1	89359.1	0	240319	78457.6	240136	389.386	463940	210299	881710	3430.92	2484.59	946.324	857.106	382.488	515.417	32316.8
Mean	Canada	CAN	HIC	Americas	Northern America	NA	Canada	3.75117e+07	0.23799	1.6905e+07	1.6905e+07	8.69994e+06	5.1238e+06	190444	2.89078e+06	8.20502e+06	8.69994e+06	0	0	1.69416e+07	11482.2	1.69301e+07	0	1.69301e+07	8892.41	1.69212e+07	8.69994e+06	8.22129e+06	0	8.69994e+06	190444	2.89078e+06	5.14006e+06	16263.5	5.1238e+06	0	0	0	0	0	0	20374.6	2009.09	1462.24	546.849	1005.83	620.474	385.357	374.289
Min	Canada	CAN	HIC	Americas	Northern America	NA	Canada	3.75117e+07	0.23799	1.4946e+07	1.4946e+07	5.89421e+06	3.90784e+06	51704.9	1.08669e+06	5.94205e+06	5.89421e+06	0	0	1.49814e+07	9481.3	1.49707e+07	0	1.49707e+07	7222.26	1.49623e+07	5.89421e+06	5.95918e+06	0	5.89421e+06	51704.9	1.08669e+06	3.92299e+06	12192.4	3.90784e+06	0	0	0	0	0	0	17317.5	1639.94	1194.94	445.008	785.515	478.605	302.714	242.682
Lower quartile	Canada	CAN	HIC	Americas	Northern America	NA	Canada	3.75117e+07	0.23799	1.63608e+07	1.63608e+07	8.20042e+06	4.86818e+06	129578	2.46582e+06	7.68727e+06	8.20042e+06	0	0	1.63967e+07	11112.2	1.63856e+07	0	1.63856e+07	8497.23	1.63771e+07	8.20042e+06	7.70317e+06	0	8.20042e+06	129578	2.46582e+06	4.8847e+06	15365.2	4.86818e+06	0	0	0	0	0	0	19651.2	1942.66	1413.8	528.917	954.986	587.632	364.538	345.115
Median	Canada	CAN	HIC	Americas	Northern America	NA	Canada	3.75117e+07	0.23799	1.68481e+07	1.68481e+07	8.66989e+06	5.11092e+06	177835	2.82843e+06	8.15269e+06	8.66989e+06	0	0	1.68841e+07	11459.3	1.68731e+07	0	1.68731e+07	8858.25	1.68645e+07	8.66989e+06	8.16876e+06	0	8.66989e+06	177835	2.82843e+06	5.12685e+06	16261.7	5.11092e+06	0	0	0	0	0	0	20329.9	2005.73	1460.03	545.794	1001.16	617.304	383.343	372.709
Upper quartile	Canada	CAN	HIC	Americas	Northern America	NA	Canada	3.75117e+07	0.23799	1.73855e+07	1.73855e+07	9.18721e+06	5.36976e+06	237415	3.24505e+06	8.65829e+06	9.18721e+06	0	0	1.74226e+07	11831.8	1.74107e+07	0	1.74107e+07	9266.46	1.74012e+07	9.18721e+06	8.67466e+06	0	9.18721e+06	237415	3.24505e+06	5.3863e+06	17163.2	5.36976e+06	0	0	0	0	0	0	21048.6	2071.65	1507.97	563.76	1052.46	649.754	404.344	401.351
Max	Canada	CAN	HIC	Americas	Northern America	NA	Canada	3.75117e+07	0.23799	1.96636e+07	1.96636e+07	1.19646e+07	6.64092e+06	526247	5.69648e+06	1.12474e+07	1.19646e+07	0	0	1.97007e+07	13987.1	1.96887e+07	0	1.96887e+07	11536.5	1.96793e+07	1.19646e+07	1.12657e+07	0	1.19646e+07	526247	5.69648e+06	6.65681e+06	20239.2	6.64092e+06	0	0	0	0	0	0	24812.5	2431.71	1772.46	660.755	1409.35	846.596	582.876	550.025
Mean	Cocos Islands	CCK	HIC	Oceania	Australia and New Zealand	NA	OECD Oceania	475.292	1	158.601	83.6102	81.5286	2.08155	0	0	2.08155	78.7549	74.9909	2.7737	161.185	1.85991	159.325	74.9909	84.3345	0.724399	83.6102	81.5286	2.08155	2.7737	78.7549	0	0	2.08155	0	2.08155	2.25438	0.519322	2.25201	0.00237426	13.2864	61.7045	80.3489	0.325653	0.23704	0.0886132	0.0661603	0.029503	0.0366573	0
Min	Cocos Islands	CCK	HIC	Oceania	Australia and New Zealand	NA	OECD Oceania	475.292	1	1.73482	0.995784	0.995784	0	0	0	0	0.988415	0.739031	0	1.76786	0.0223266	1.74553	0.739031	1.0065	0.0107173	0.995784	0.995784	0	0	0.988415	0	0	0	0	0	0	0	0	0	0.113244	0.541604	0.779444	0.00354016	0.00253642	0.00100374	0	0	0	0
Lower quartile	Cocos Islands	CCK	HIC	Oceania	Australia and New Zealand	NA	OECD Oceania	475.292	1	93.68	48.1422	46.9689	0	0	0	0	45.3464	43.6514	0.838037	95.1821	1.09917	94.0725	43.6514	48.5427	0.338449	48.1422	46.9689	0	0.838037	45.3464	0	0	0	0	0	0.663929	0.0948	0.663541	0.000435173	6.55462	35.771	46.8756	0.190814	0.13928	0.0516042	0.0196465	0.00862989	0.0108839	0
Median	Cocos Islands	CCK	HIC	Oceania	Australia and New Zealand	NA	OECD Oceania	475.292	1	140.52	73.3394	71.4307	0.264929	0	0	0.264929	69.1636	65.6955	1.96713	142.451	1.6301	140.859	65.6955	73.8529	0.578889	73.3394	71.4307	0.264929	1.96713	69.1636	0	0	0.264929	0	0.264929	1.56084	0.269015	1.55893	0.00120611	10.8734	53.6946	70.5747	0.284191	0.206873	0.07751	0.0422015	0.0186436	0.0233527	0
Upper quartile	Cocos Islands	CCK	HIC	Oceania	Australia and New Zealand	NA	OECD Oceania	475.292	1	211.647	110.318	107.587	2.74173	0	0	2.74173	103.79	99.5298	3.90072	214.946	2.47049	212.412	99.5298	111.16	0.945438	110.318	107.587	2.74173	3.90072	103.79	0	0	2.74173	0	2.74173	3.13583	0.642732	3.13179	0.00297409	17.2906	81.4688	106.856	0.43207	0.314775	0.117352	0.083845	0.0374302	0.0461025	0
Max	Cocos Islands	CCK	HIC	Oceania	Australia and New Zealand	NA	OECD Oceania	475.292	1	588.102	336.806	336.806	28.5968	0	0	28.5968	314.308	286.397	22.4987	596.706	7.09913	589.606	286.397	338.31	4.29928	336.806	336.806	28.5968	22.4987	314.308	0	0	28.5968	0	28.5968	17.256	9.02614	17.2377	0.0344784	73.2998	242.404	303.364	1.3659	1.02381	0.342095	0.726149	0.352984	0.373164	0
Mean	Switzerland	CHE	HIC	Europe	Western Europe	NA	OECD Non-EU countries	8.59744e+06	0.236727	3.6711e+06	3.6711e+06	1.02392e+06	1.13093e+06	184653	1.33159e+06	2.64718e+06	1.02392e+06	0	0	3.67999e+06	3018.46	3.67698e+06	0	3.67698e+06	2135.02	3.67484e+06	1.02392e+06	2.65092e+06	0	1.02392e+06	184653	1.33159e+06	1.13467e+06	3741.81	1.13093e+06	0	0	0	0	0	0	5153.48	528.274	384.499	143.775	218.338	134.753	83.5856	86.1083
Min	Switzerland	CHE	HIC	Europe	Western Europe	NA	OECD Non-EU countries	8.59744e+06	0.236727	3.24751e+06	3.24751e+06	646412	934084	67878.5	949024	2.12534e+06	646412	0	0	3.25566e+06	2596.5	3.253e+06	0	3.253e+06	1726.17	3.2512e+06	646412	2.1289e+06	0	646412	67878.5	949024	937758	3019.66	934084	0	0	0	0	0	0	4362.94	449.838	327.255	122.582	162.706	100.944	61.205	63.3664
Lower quartile	Switzerland	CHE	HIC	Europe	Western Europe	NA	OECD Non-EU countries	8.59744e+06	0.236727	3.5943e+06	3.5943e+06	935950	1.08611e+06	160868	1.25286e+06	2.55026e+06	935950	0	0	3.60289e+06	2924.05	3.6e+06	0	3.6e+06	2045.97	3.598e+06	935950	2.55398e+06	0	935950	160868	1.25286e+06	1.08986e+06	3592.75	1.08611e+06	0	0	0	0	0	0	4985.51	511.687	372.441	139.169	207.191	127.566	79.0415	81.1807
Median	Switzerland	CHE	HIC	Europe	Western Europe	NA	OECD Non-EU countries	8.59744e+06	0.236727	3.67012e+06	3.67012e+06	1.0197e+06	1.13009e+06	183557	1.33336e+06	2.64703e+06	1.0197e+06	0	0	3.67893e+06	3014	3.67584e+06	0	3.67584e+06	2133.37	3.67369e+06	1.0197e+06	2.65074e+06	0	1.0197e+06	183557	1.33336e+06	1.13385e+06	3742.87	1.13009e+06	0	0	0	0	0	0	5146.48	527.71	384.112	143.531	217.738	134.31	83.3376	85.8182
Upper quartile	Switzerland	CHE	HIC	Europe	Western Europe	NA	OECD Non-EU countries	8.59744e+06	0.236727	3.74618e+06	3.74618e+06	1.10495e+06	1.17451e+06	207097	1.40973e+06	2.74408e+06	1.10495e+06	0	0	3.75519e+06	3108.33	3.7521e+06	0	3.7521e+06	2218.53	3.74983e+06	1.10495e+06	2.74768e+06	0	1.10495e+06	207097	1.40973e+06	1.17826e+06	3888.23	1.17451e+06	0	0	0	0	0	0	5314.56	544.518	396.386	148.222	229.152	141.448	87.8961	90.6563
Max	Switzerland	CHE	HIC	Europe	Western Europe	NA	OECD Non-EU countries	8.59744e+06	0.236727	4.25427e+06	4.25427e+06	1.46203e+06	1.34539e+06	337673	1.71367e+06	3.14879e+06	1.46203e+06	0	0	4.26348e+06	3687.08	4.26016e+06	0	4.26016e+06	2641.58	4.25802e+06	1.46203e+06	3.15254e+06	0	1.46203e+06	337673	1.71367e+06	1.34917e+06	4448.52	1.34539e+06	0	0	0	0	0	0	6133.22	649.663	472.609	177.053	289.7	177.237	112.463	115.176
Mean	Chile	CHL	HIC	Americas	Latin America and the Caribbean	South America	Other OECD America	1.92945e+07	0.182296	8.72779e+06	8.63986e+06	7.87093e+06	768913	13.8288	0	768927	7.87093e+06	87931.1	0	8.74618e+06	4888.38	8.7413e+06	87931.1	8.65336e+06	4504.32	8.64886e+06	7.87093e+06	777930	0	7.87093e+06	13.8288	0	777916	9003.55	768913	0	0	0	0	58142.1	29789	97323.9	855.438	622.659	232.779	555.588	342.6	212.988	207.144
Min	Chile	CHL	HIC	Americas	Latin America and the Caribbean	South America	Other OECD America	1.92945e+07	0.182296	7.51832e+06	7.44138e+06	6.64777e+06	352431	0	0	352431	6.64777e+06	47833.5	0	7.53672e+06	4050.2	7.53267e+06	47833.5	7.45574e+06	3463.44	7.45201e+06	6.64777e+06	361503	0	6.64777e+06	0	0	361503	6166.6	352431	0	0	0	0	29144.3	9826.56	56671.7	706.975	513.845	191.705	408.721	246.863	157.075	133.833
Lower quartile	Chile	CHL	HIC	Americas	Latin America and the Caribbean	South America	Other OECD America	1.92945e+07	0.182296	8.49823e+06	8.41421e+06	7.63874e+06	654916	0	0	654916	7.63874e+06	77643.7	0	8.51617e+06	4680.27	8.51152e+06	77643.7	8.42729e+06	4274.53	8.4228e+06	7.63874e+06	664201	0	7.63874e+06	0	0	664201	8426.52	654916	0	0	0	0	50465.2	24661.3	86979	818.408	595.513	222.63	521.968	321.619	199.283	187.844
Median	Chile	CHL	HIC	Americas	Latin America and the Caribbean	South America	Other OECD America	1.92945e+07	0.182296	8.71934e+06	8.6306e+06	7.86481e+06	755347	0	0	755347	7.86481e+06	87332.8	0	8.73759e+06	4876.2	8.73285e+06	87332.8	8.6448e+06	4482.01	8.64036e+06	7.86481e+06	764468	0	7.86481e+06	0	0	764468	8998.89	755347	0	0	0	0	57445.9	29385.6	96781.1	852.99	620.646	232.244	552.623	340.579	211.929	205.318
Upper quartile	Chile	CHL	HIC	Americas	Latin America and the Caribbean	South America	Other OECD America	1.92945e+07	0.182296	8.94908e+06	8.85734e+06	8.09072e+06	872636	0	0	872636	8.09072e+06	97349.6	0	8.96744e+06	5078.56	8.96251e+06	97349.6	8.87085e+06	4716.62	8.86662e+06	8.09072e+06	881897	0	8.09072e+06	0	0	881897	9586.6	872636	0	0	0	0	65160.4	34494.7	106774	889.181	647.53	241.97	585.337	361.135	224.473	224.463
Max	Chile	CHL	HIC	Americas	Latin America and the Caribbean	South America	Other OECD America	1.92945e+07	0.182296	9.92021e+06	9.82027e+06	9.18291e+06	1.47464e+06	1120.97	0	1.47464e+06	9.18291e+06	147528	0	9.94022e+06	6262.73	9.93481e+06	147528	9.83431e+06	6169.09	9.82903e+06	9.18291e+06	1.48345e+06	0	9.18291e+06	1120.97	0	1.48345e+06	11492.7	1.47464e+06	0	0	0	0	109876	61000.8	157251	1080.51	788.004	292.509	811.211	517.68	313.673	307.849
Mean	China	CHN	UMC	Asia	Eastern Asia	NA	China	1.42373e+09	0.16383	3.01026e+08	2.80566e+08	1.56307e+08	3869.98	3.82154e+06	1.20434e+08	1.24259e+08	1.55465e+08	2.04606e+07	841738	3.46002e+08	1.0524e+06	3.4495e+08	2.04606e+07	3.24489e+08	1.36684e+06	3.23122e+08	1.56307e+08	1.66816e+08	841738	1.55465e+08	3.82154e+06	1.20434e+08	4.25605e+07	4.25566e+07	3869.98	681063	160675	680364	699.111	6.81613e+06	1.36444e+07	2.37216e+07	184190	134062	50128.4	166317	73837.5	92479.7	1.29283e+07
Min	China	CHN	UMC	Asia	Eastern Asia	NA	China	1.42373e+09	0.16383	2.85073e+08	2.64531e+08	1.49551e+08	0	2.70185e+06	1.10366e+08	1.14148e+08	1.4871e+08	1.96284e+07	775613	3.29696e+08	1.01483e+06	3.28681e+08	1.96284e+07	3.08485e+08	1.27938e+06	3.07162e+08	1.49551e+08	1.55965e+08	775613	1.4871e+08	2.70185e+06	1.10366e+08	3.84127e+07	3.84126e+07	0	626599	139317	625966	604.77	6.44416e+06	1.30504e+07	2.28797e+07	176994	128869	48124.9	152270	67568.8	84700.9	1.1459e+07
Lower quartile	China	CHN	UMC	Asia	Eastern Asia	NA	China	1.42373e+09	0.16383	2.97264e+08	2.76829e+08	1.54797e+08	84.7126	3.49466e+06	1.18058e+08	1.21754e+08	1.53959e+08	2.0286e+07	827436	3.42084e+08	1.04448e+06	3.41045e+08	2.0286e+07	3.20669e+08	1.34663e+06	3.19289e+08	1.54797e+08	1.64122e+08	827436	1.53959e+08	3.49466e+06	1.18058e+08	4.15598e+07	4.15573e+07	84.7126	668754	156471	668073	681.016	6.73116e+06	1.35182e+07	2.35345e+07	182727	133015	49723	163210	72426.7	90704.5	1.25633e+07
Median	China	CHN	UMC	Asia	Eastern Asia	NA	China	1.42373e+09	0.16383	3.00862e+08	2.80407e+08	1.56281e+08	979.281	3.77589e+06	1.20418e+08	1.24236e+08	1.55433e+08	2.04538e+07	841086	3.45863e+08	1.05201e+06	3.44815e+08	2.04538e+07	3.24352e+08	1.36554e+06	3.2298e+08	1.56281e+08	1.66745e+08	841086	1.55433e+08	3.77589e+06	1.20418e+08	4.24635e+07	4.24596e+07	979.281	680476	160466	679769	697.861	6.81121e+06	1.36393e+07	2.37158e+07	184105	133997	50109	166136	73764.2	92370.9	1.28906e+07
Upper quartile	China	CHN	UMC	Asia	Eastern Asia	NA	China	1.42373e+09	0.16383	3.04837e+08	2.84309e+08	1.57779e+08	4984.71	4.09457e+06	1.22795e+08	1.2678e+08	1.56935e+08	2.06261e+07	855667	3.49837e+08	1.06006e+06	3.48778e+08	2.06261e+07	3.28273e+08	1.38557e+06	3.26903e+08	1.57779e+08	1.69459e+08	855667	1.56935e+08	4.09457e+06	1.22795e+08	4.34781e+07	4.34755e+07	4984.71	692372	164554	691663	715.819	6.8951e+06	1.37666e+07	2.38963e+07	185556	135050	50511	169170	75078.5	94086.4	1.32473e+07
Max	China	CHN	UMC	Asia	Eastern Asia	NA	China	1.42373e+09	0.16383	3.18516e+08	2.98032e+08	1.64712e+08	54344.2	5.70875e+06	1.31296e+08	1.35755e+08	1.63874e+08	2.14856e+07	942236	3.64232e+08	1.09656e+06	3.63147e+08	2.14856e+07	3.42663e+08	1.47949e+06	3.41263e+08	1.64712e+08	1.79558e+08	942236	1.63874e+08	5.70875e+06	1.31296e+08	4.88231e+07	4.88117e+07	54344.2	758373	190373	757574	869.265	7.34459e+06	1.43606e+07	2.47569e+07	193260	140700	52559.8	188710	84751.7	103958	1.49642e+07
Mean	Côte d'Ivoire	CIV	LMC	Africa	Sub-Saharan Africa	Western Africa	Other Africa	2.68122e+07	0.338992	5.41584e+06	1.99236e+06	1.99236e+06	0	0	0	0	0	3.42349e+06	1.99236e+06	6.01444e+06	58721.1	5.95571e+06	3.42349e+06	2.53223e+06	19119.7	2.51311e+06	1.99236e+06	520751	1.99236e+06	0	0	0	520751	520751	0	1.61237e+06	379993	1.61071e+06	1656.8	1.92561e+06	1.49788e+06	5.49368e+06	10276.2	7479.1	2797.13	1705.44	713.003	992.439	157387
Min	Côte d'Ivoire	CIV	LMC	Africa	Sub-Saharan Africa	Western Africa	Other Africa	2.68122e+07	0.338992	4.95072e+06	1.74194e+06	1.74194e+06	0	0	0	0	0	3.04024e+06	1.74194e+06	5.46332e+06	49693.2	5.40791e+06	3.04024e+06	2.1669e+06	13677	2.1464e+06	1.74194e+06	294301	1.74194e+06	0	0	0	294301	294301	0	1.03677e+06	173527	1.03578e+06	785.933	1.29993e+06	894403	5.02535e+06	8709.81	6339.61	2355.58	1094.8	446.331	607.395	82897.6
Lower quartile	Côte d'Ivoire	CIV	LMC	Africa	Sub-Saharan Africa	Western Africa	Other Africa	2.68122e+07	0.338992	5.31511e+06	1.9369e+06	1.9369e+06	0	0	0	0	0	3.34206e+06	1.9369e+06	5.88005e+06	56766	5.82246e+06	3.34206e+06	2.42951e+06	17448.1	2.41102e+06	1.9369e+06	432788	1.9369e+06	0	0	0	432788	432788	0	1.53264e+06	298389	1.53093e+06	1291.78	1.74131e+06	1.31733e+06	5.39107e+06	9923.22	7221.91	2699.06	1541.02	638.251	893.512	127956
Median	Côte d'Ivoire	CIV	LMC	Africa	Sub-Saharan Africa	Western Africa	Other Africa	2.68122e+07	0.338992	5.41365e+06	1.98939e+06	1.98939e+06	0	0	0	0	0	3.4199e+06	1.98939e+06	6.00397e+06	58596.5	5.94523e+06	3.4199e+06	2.51621e+06	18830.7	2.49712e+06	1.98939e+06	496387	1.98939e+06	0	0	0	496387	496387	0	1.62218e+06	361317	1.62083e+06	1557.77	1.92871e+06	1.49429e+06	5.49192e+06	10256	7462.87	2790.97	1683.48	701.039	979.208	147746
Upper quartile	Côte d'Ivoire	CIV	LMC	Africa	Sub-Saharan Africa	Western Africa	Other Africa	2.68122e+07	0.338992	5.51202e+06	2.04582e+06	2.04582e+06	0	0	0	0	0	3.49989e+06	2.04582e+06	6.13709e+06	60568.2	6.0776e+06	3.49989e+06	2.6211e+06	20506.6	2.60131e+06	2.04582e+06	587023	2.04582e+06	0	0	0	587023	587023	0	1.69982e+06	444710	1.69806e+06	1926.65	2.10843e+06	1.67927e+06	5.59104e+06	10612.9	7726.11	2887.87	1846.23	777.143	1075.68	177170
Max	Côte d'Ivoire	CIV	LMC	Africa	Sub-Saharan Africa	Western Africa	Other Africa	2.68122e+07	0.338992	5.97373e+06	2.29564e+06	2.29564e+06	0	0	0	0	0	3.89795e+06	2.29564e+06	6.78805e+06	69918.7	6.72353e+06	3.89795e+06	3.19606e+06	30966.5	3.16892e+06	2.29564e+06	1.04811e+06	2.29564e+06	0	0	0	1.04811e+06	1.04811e+06	0	1.98538e+06	848588	1.98334e+06	3678.15	2.61603e+06	2.12572e+06	6.055e+06	12586.7	9117.88	3468.82	2754.24	1271.16	1826.3	438686
Mean	Cameroon	CMR	LMC	Africa	Sub-Saharan Africa	Middle Africa	Other Africa	2.64882e+07	0.25659	6.23998e+06	2.6706e+06	2.6706e+06	0	0	0	0	692521	3.56938e+06	1.97808e+06	6.89222e+06	52727.8	6.8395e+06	3.56938e+06	3.27011e+06	23385.7	3.24673e+06	2.6706e+06	576125	1.97808e+06	692521	0	0	576125	576125	0	1.5982e+06	379876	1.59656e+06	1638.6	2.01277e+06	1.55662e+06	5.62358e+06	9224.75	6713.96	2510.79	2408.13	1005.66	1402.47	175608
Min	Cameroon	CMR	LMC	Africa	Sub-Saharan Africa	Middle Africa	Other Africa	2.64882e+07	0.25659	5.2777e+06	2.11579e+06	2.11579e+06	0	0	0	0	329317	2.98502e+06	1.57769e+06	5.75159e+06	42492.1	5.70502e+06	2.98502e+06	2.62885e+06	14704.7	2.60612e+06	2.11579e+06	298069	1.57769e+06	329317	0	0	298069	298069	0	1.11088e+06	149225	1.1099e+06	783.916	1.18564e+06	821994	4.90852e+06	7400.37	5395.46	2000.99	1223.02	522.321	700.702	82001.4
Lower quartile	Cameroon	CMR	LMC	Africa	Sub-Saharan Africa	Middle Africa	Other Africa	2.64882e+07	0.25659	6.04227e+06	2.55134e+06	2.55134e+06	0	0	0	0	611589	3.44863e+06	1.89418e+06	6.6772e+06	50269.1	6.62565e+06	3.44863e+06	3.12442e+06	21183.8	3.10175e+06	2.55134e+06	492379	1.89418e+06	611589	0	0	492379	492379	0	1.51245e+06	311410	1.51081e+06	1338.04	1.81276e+06	1.3663e+06	5.47757e+06	8782.17	6393.34	2388.2	2084.4	861.081	1206.69	146052
Median	Cameroon	CMR	LMC	Africa	Sub-Saharan Africa	Middle Africa	Other Africa	2.64882e+07	0.25659	6.2579e+06	2.67567e+06	2.67567e+06	0	0	0	0	713520	3.56744e+06	1.97299e+06	6.90498e+06	52637.2	6.85274e+06	3.56744e+06	3.27129e+06	23057.5	3.24775e+06	2.67567e+06	560239	1.97299e+06	713520	0	0	560239	560239	0	1.60007e+06	367684	1.59843e+06	1576.32	2.00492e+06	1.5628e+06	5.61875e+06	9194.48	6692.19	2504.32	2349.88	973.521	1366.72	168501
Upper quartile	Cameroon	CMR	LMC	Africa	Sub-Saharan Africa	Middle Africa	Other Africa	2.64882e+07	0.25659	6.45031e+06	2.79271e+06	2.79271e+06	0	0	0	0	791929	3.68743e+06	2.05339e+06	7.11031e+06	55037.8	7.05596e+06	3.68743e+06	3.41409e+06	25295.9	3.3904e+06	2.79271e+06	645570	2.05339e+06	791929	0	0	645570	645570	0	1.68761e+06	438116	1.68585e+06	1880.87	2.20078e+06	1.74654e+06	5.76402e+06	9647.82	7016.44	2626.82	2668.66	1118.82	1558.44	198800
Max	Cameroon	CMR	LMC	Africa	Sub-Saharan Africa	Middle Africa	Other Africa	2.64882e+07	0.25659	7.16649e+06	3.24681e+06	3.24681e+06	0	0	0	0	987951	4.16633e+06	2.46272e+06	7.93517e+06	68391.4	7.87531e+06	4.16633e+06	4.02503e+06	38091.7	4.00194e+06	3.24681e+06	1.1894e+06	2.46272e+06	987951	0	0	1.1894e+06	1.1894e+06	0	2.05948e+06	735588	2.05676e+06	3501.37	3.07596e+06	2.57988e+06	6.33998e+06	11668.7	8548.47	3143	5028.29	2051.38	3276.16	389584
Mean	Democratic Republic of the Congo	COD	LIC	Africa	Sub-Saharan Africa	Middle Africa	Other Africa	9.29255e+07	0.27491	1.51469e+07	4.79354e+06	4.79354e+06	0	0	0	0	0	1.03534e+07	4.79354e+06	1.67271e+07	332251	1.63948e+07	1.03534e+07	6.04147e+06	102665	5.93881e+06	4.79354e+06	1.14527e+06	4.79354e+06	0	0	0	1.14527e+06	1.14527e+06	0	3.8769e+06	916640	3.87292e+06	3979.67	7.16808e+06	3.18529e+06	1.55818e+07	58137.5	42310.9	15826.6	8140.81	3405.67	4735.14	347732
Min	Democratic Republic of the Congo	COD	LIC	Africa	Sub-Saharan Africa	Middle Africa	Other Africa	9.29255e+07	0.27491	1.33481e+07	3.12618e+06	3.12618e+06	0	0	0	0	0	7.74033e+06	3.12618e+06	1.49118e+07	265573	1.46337e+07	7.74033e+06	4.30717e+06	66320.4	4.23403e+06	3.12618e+06	800142	3.12618e+06	0	0	0	800142	800142	0	2.56015e+06	505367	2.55761e+06	2155.22	5.43891e+06	2.17396e+06	1.37136e+07	46339.3	33782.1	12557.2	4603.15	2001.03	2557.79	244990
Lower quartile	Democratic Republic of the Congo	COD	LIC	Africa	Sub-Saharan Africa	Middle Africa	Other Africa	9.29255e+07	0.27491	1.48193e+07	4.24372e+06	4.24372e+06	0	0	0	0	0	9.81579e+06	4.24372e+06	1.63861e+07	315419	1.60598e+07	9.81579e+06	5.48558e+06	91790	5.39194e+06	4.24372e+06	1.06094e+06	4.24372e+06	0	0	0	1.06094e+06	1.06094e+06	0	3.42835e+06	765624	3.42538e+06	3345.19	6.75323e+06	2.90243e+06	1.52468e+07	55143.1	40131.4	15005.3	6938.09	2883.01	4031.15	316639
Median	Democratic Republic of the Congo	COD	LIC	Africa	Sub-Saharan Africa	Middle Africa	Other Africa	9.29255e+07	0.27491	1.51517e+07	4.69537e+06	4.69537e+06	0	0	0	0	0	1.04231e+07	4.69537e+06	1.67385e+07	331028	1.64073e+07	1.04231e+07	5.94525e+06	100399	5.84515e+06	4.69537e+06	1.13328e+06	4.69537e+06	0	0	0	1.13328e+06	1.13328e+06	0	3.79139e+06	873137	3.78707e+06	3768.55	7.1808e+06	3.15292e+06	1.55871e+07	57918.2	42145.5	15767.3	7788.92	3235.61	4515.93	341700
Upper quartile	Democratic Republic of the Congo	COD	LIC	Africa	Sub-Saharan Africa	Middle Africa	Other Africa	9.29255e+07	0.27491	1.54732e+07	5.29459e+06	5.29459e+06	0	0	0	0	0	1.09303e+07	5.29459e+06	1.70672e+07	348317	1.67286e+07	1.09303e+07	6.54473e+06	110927	6.43521e+06	5.29459e+06	1.2184e+06	5.29459e+06	0	0	0	1.2184e+06	1.2184e+06	0	4.27431e+06	1.01266e+06	4.27006e+06	4357.03	7.57428e+06	3.44495e+06	1.59176e+07	60939.2	44342.7	16592.9	8877.76	3719.9	5144.19	372720
Max	Democratic Republic of the Congo	COD	LIC	Africa	Sub-Saharan Africa	Middle Africa	Other Africa	9.29255e+07	0.27491	1.69535e+07	7.06765e+06	7.06765e+06	0	0	0	0	0	1.2355e+07	7.06765e+06	1.86483e+07	400622	1.82629e+07	1.2355e+07	8.36735e+06	180152	8.22851e+06	7.06765e+06	1.58688e+06	7.06765e+06	0	0	0	1.58688e+06	1.58688e+06	0	6.17567e+06	2.16577e+06	6.16818e+06	10001.1	9.27735e+06	4.7088e+06	1.74451e+07	71703.2	52350.7	19352.5	23284.4	12137.6	12520.5	568987
Mean	Republic of Congo	COG	LMC	Africa	Sub-Saharan Africa	Middle Africa	Other Africa	5.70295e+06	0.122768	1.25853e+06	648228	647664	0	564.148	0	564.148	0	610298	647664	1.41785e+06	7979.59	1.40987e+06	610298	799570	4739.44	794831	647664	147167	647664	0	564.148	0	146603	146603	0	523928	123736	523389	538.155	346866	263432	1.27068e+06	1395.9	1015.73	380.175	488.636	204.05	284.586	44469.9
Min	Republic of Congo	COG	LMC	Africa	Sub-Saharan Africa	Middle Africa	Other Africa	5.70295e+06	0.122768	793223	245804	245801	0	0	0	0	0	189212	245801	902887	4511.83	897732	189212	364990	1991.11	362655	245801	49874.6	245801	0	0	0	49216.1	49216.1	0	185298	27338.1	185096	127.355	89934.8	62062.3	802486	784.905	573.764	211.141	177.853	62.1706	95.7896	11972.7
Lower quartile	Republic of Congo	COG	LMC	Africa	Sub-Saharan Africa	Middle Africa	Other Africa	5.70295e+06	0.122768	1.1023e+06	515319	515218	0	0	0	0	0	477898	515218	1.26132e+06	6806	1.25359e+06	477898	659990	3677.02	655430	515218	110743	515218	0	0	0	110087	110087	0	408421	78837.2	408091	341.856	248382	177792	1.11355e+06	1185.45	863.438	322.382	351.269	144.41	203.41	31739.5
Median	Republic of Congo	COG	LMC	Africa	Sub-Saharan Africa	Middle Africa	Other Africa	5.70295e+06	0.122768	1.25722e+06	620900	620537	0	0	0	0	0	595587	620537	1.41681e+06	7683.2	1.40915e+06	595587	774406	4433.65	769797	620537	137621	620537	0	0	0	137003	137003	0	499692	107871	499274	462.825	318280	236374	1.26907e+06	1343.84	977.761	365.19	439.704	182.37	254.793	40647.6
Upper quartile	Republic of Congo	COG	LMC	Africa	Sub-Saharan Africa	Middle Africa	Other Africa	5.70295e+06	0.122768	1.39398e+06	755759	754880	0	0	0	0	0	723477	754880	1.55962e+06	8806.26	1.55119e+06	723477	913740	5442.37	908528	754880	173800	754880	0	0	0	173505	173505	0	611376	151483	610729	649.164	421668	326600	1.4072e+06	1540.2	1120.58	418.115	564.429	237.103	330.735	53230.8
Max	Republic of Congo	COG	LMC	Africa	Sub-Saharan Africa	Middle Africa	Other Africa	5.70295e+06	0.122768	1.84597e+06	1.42128e+06	1.42128e+06	0	19296.1	0	19296.1	0	1.44467e+06	1.42128e+06	2.10515e+06	21204.8	2.08394e+06	1.44467e+06	1.60055e+06	17715.4	1.59367e+06	1.42128e+06	397395	1.42128e+06	0	19296.1	0	395823	395823	0	1.23595e+06	640428	1.23508e+06	3089.49	1.08246e+06	881087	1.85946e+06	3888.43	2813.03	1075.4	1977.79	969.48	1382.02	137846
Mean	Cook Islands	COK	HIC	Oceania	Polynesia	NA	Other non-OECD Asia	16890.4	1	12205.6	12205.6	11009.1	1196.46	0	0	1196.46	11009.1	0	0	12240.1	15.4871	12224.6	0	12224.6	19.0225	12205.6	11009.1	1196.46	0	11009.1	0	0	1196.46	0	1196.46	0	0	0	0	0	0	34.5097	2.70723	1.97127	0.735958	2.54307	1.5725	0.97057	0
Min	Cook Islands	COK	HIC	Oceania	Polynesia	NA	Other non-OECD Asia	16890.4	1	1417.95	1417.95	1331.97	0	0	0	0	1331.97	0	0	1423.58	1.27851	1421.98	0	1421.98	0.802904	1417.95	1331.97	0	0	1331.97	0	0	0	0	0	0	0	0	0	0	0	2.08141	0.245492	0.180766	0.0647259	0.0799748	0.0486337	0.0229136	0
Lower quartile	Cook Islands	COK	HIC	Oceania	Polynesia	NA	Other non-OECD Asia	16890.4	1	9062.53	9062.53	7891.18	0	0	0	0	7891.18	0	0	9080.74	9.44528	9071.81	0	9071.81	9.12224	9062.53	7891.18	0	0	7891.18	0	0	0	0	0	0	0	0	0	0	0	19.6579	1.64288	1.19339	0.446965	1.06998	0.64601	0.384729	0
Median	Cook Islands	COK	HIC	Oceania	Polynesia	NA	Other non-OECD Asia	16890.4	1	12330	12330	11030.7	403.921	0	0	403.921	11030.7	0	0	12351.9	13.6539	12339.2	0	12339.2	15.3249	12330	11030.7	403.921	0	11030.7	0	0	403.921	0	403.921	0	0	0	0	0	0	29.3589	2.37786	1.72907	0.648524	1.89471	1.16955	0.701661	0
Upper quartile	Cook Islands	COK	HIC	Oceania	Polynesia	NA	Other non-OECD Asia	16890.4	1	15289.2	15289.2	13912.6	1839	0	0	1839	13912.6	0	0	15347.6	19.6435	15322.7	0	15322.7	24.8368	15289.2	13912.6	1839	0	13912.6	0	0	1839	0	1839	0	0	0	0	0	0	44.0497	3.43773	2.49599	0.934981	3.25029	2.01493	1.25781	0
Max	Cook Islands	COK	HIC	Oceania	Polynesia	NA	Other non-OECD Asia	16890.4	1	22748.8	22748.8	22748.8	9145.29	0	0	9145.29	22748.8	0	0	22804.5	61.8187	22783.6	0	22783.6	121.289	22748.8	22748.8	9145.29	0	22748.8	0	0	9145.29	0	9145.29	0	0	0	0	0	0	176.544	10.6848	7.75839	3.00778	18.9538	13.4868	8.0479	0
Mean	Colombia	COL	UMC	Americas	Latin America and the Caribbean	South America	Other OECD America	5.09088e+07	0.185185	1.34262e+07	1.2172e+07	1.11355e+07	1.03149e+06	4998.54	0	1.03649e+06	1.10849e+07	1.25424e+06	50567.4	1.49944e+07	38268.6	1.49561e+07	1.25424e+06	1.37018e+07	40413.3	1.36614e+07	1.11355e+07	2.52596e+06	50567.4	1.10849e+07	4998.54	0	2.52096e+06	1.48947e+06	1.03149e+06	40920.5	9646.92	40878.4	42.0205	369249	884994	1.38349e+06	6697.54	4874.7	1822.84	4856.61	2156.56	2700.05	451906
Min	Colombia	COL	UMC	Americas	Latin America and the Caribbean	South America	Other OECD America	5.09088e+07	0.185185	1.22788e+07	1.10907e+07	1.01342e+07	826473	1481.39	0	831931	1.00865e+07	1.12872e+06	43266.1	1.37865e+07	35021.2	1.37493e+07	1.12872e+06	1.25475e+07	33987.4	1.25108e+07	1.01342e+07	1.90483e+06	43266.1	1.00865e+07	1481.39	0	1.89952e+06	970724	826473	34853.5	7486.95	34819.3	33.9256	323940	795730	1.24716e+06	6116.03	4455.26	1660.77	3781.05	1670.08	2110.97	288605
Lower quartile	Colombia	COL	UMC	Americas	Latin America and the Caribbean	South America	Other OECD America	5.09088e+07	0.185185	1.32092e+07	1.19656e+07	1.09388e+07	980840	3606.49	0	985877	1.08884e+07	1.22855e+06	49041.7	1.47208e+07	37493.1	1.46831e+07	1.22855e+06	1.3432e+07	38732.8	1.33923e+07	1.09388e+07	2.34053e+06	49041.7	1.08884e+07	3606.49	0	2.33559e+06	1.31027e+06	980840	39651.8	9228.47	39612.8	40.1618	358962	867215	1.35677e+06	6561.98	4776.67	1785.18	4559.17	2024.41	2535.56	389097
Median	Colombia	COL	UMC	Americas	Latin America and the Caribbean	South America	Other OECD America	5.09088e+07	0.185185	1.34219e+07	1.21704e+07	1.11278e+07	1.02757e+06	4518.21	0	1.0325e+06	1.10779e+07	1.25256e+06	50530.5	1.49821e+07	38235	1.49442e+07	1.25256e+06	1.3688e+07	40121.4	1.36475e+07	1.11278e+07	2.49289e+06	50530.5	1.10779e+07	4518.21	0	2.48781e+06	1.45331e+06	1.02757e+06	40894.9	9616.15	40852.9	41.9168	368416	883917	1.38201e+06	6692.66	4872.15	1821.53	4790.11	2124.81	2662.37	434142
Upper quartile	Colombia	COL	UMC	Americas	Latin America and the Caribbean	South America	Other OECD America	5.09088e+07	0.185185	1.36389e+07	1.23719e+07	1.13331e+07	1.07795e+06	5901.84	0	1.08305e+06	1.12821e+07	1.2777e+06	52018.9	1.52545e+07	39013.3	1.52162e+07	1.2777e+06	1.39521e+07	41719.7	1.39121e+07	1.13331e+07	2.67388e+06	52018.9	1.12821e+07	5901.84	0	2.66866e+06	1.62829e+06	1.07795e+06	42130.9	10037.9	42085.3	43.7668	378662	901994	1.40824e+06	6829.45	4970.92	1859.03	5083.34	2257.28	2824.91	494945
Max	Colombia	COL	UMC	Americas	Latin America and the Caribbean	South America	Other OECD America	5.09088e+07	0.185185	1.45185e+07	1.32112e+07	1.21374e+07	1.30949e+06	16785.3	0	1.31212e+06	1.20872e+07	1.40073e+06	59008.7	1.65227e+07	42068.9	1.64831e+07	1.40073e+06	1.51853e+07	52430.5	1.51438e+07	1.21374e+07	3.55756e+06	59008.7	1.20872e+07	16785.3	0	3.55471e+06	2.60058e+06	1.30949e+06	47969	12381.1	47921.8	54.6616	432019	981812	1.53132e+06	7416.77	5401.21	2015.56	7244.1	3242.09	4071.14	969938
Mean	Comoros	COM	LIC	Africa	Sub-Saharan Africa	Eastern Africa	Other Africa	805579	0.136719	164815	90964.5	90964.5	0	0	0	0	19802.3	73850.6	71162.1	181041	2785.91	178255	73850.6	104404	1658.56	102746	90964.5	11781.2	71162.1	19802.3	0	0	11781.2	11781.2	0	57489.6	13672.6	57430.4	59.2191	49558.4	24292.2	149457	487.156	354.447	132.709	177.095	73.842	103.253	3576.6
Min	Comoros	COM	LIC	Africa	Sub-Saharan Africa	Eastern Africa	Other Africa	805579	0.136719	46522.1	19490.5	19490.5	0	0	0	0	4419.39	18310.1	14702.8	58251.4	893.722	57307.2	18310.1	31892.9	232.019	31484.6	19490.5	2268.18	14702.8	4419.39	0	0	2268.18	2268.18	0	7927.3	648.074	7922.04	3.6299	10973.9	3178.12	43246.2	148.524	106.256	42.2679	10.0335	4.2405	5.79302	524.694
Lower quartile	Comoros	COM	LIC	Africa	Sub-Saharan Africa	Eastern Africa	Other Africa	805579	0.136719	133255	70281.1	70281.1	0	0	0	0	14731.3	56515.5	53372.9	148605	2242.05	146246	56515.5	82487.4	1140.59	81034.4	70281.1	8499.72	53372.9	14731.3	0	0	8499.72	8499.72	0	42475.6	7516.55	42427.4	32.7151	37095	15772.6	120442	390.035	284.036	106.074	101.696	41.0974	58.5098	2339.5
Median	Comoros	COM	LIC	Africa	Sub-Saharan Africa	Eastern Africa	Other Africa	805579	0.136719	164915	89116.2	89116.2	0	0	0	0	19887.3	71795.3	68723	180882	2750.8	178168	71795.3	102648	1556.91	101066	89116.2	11280.2	68723	19887.3	0	0	11280.2	11280.2	0	54740.7	11938.6	54687.1	50.7368	47019.5	22585.1	149722	480.815	349.775	130.702	152.852	62.4832	87.9925	3304.47
Upper quartile	Comoros	COM	LIC	Africa	Sub-Saharan Africa	Eastern Africa	Other Africa	805579	0.136719	194764	109525	109525	0	0	0	0	24306.7	89102.4	86377	211947	3247.24	208718	89102.4	123554	2068.88	121561	109525	14656.1	86377	24306.7	0	0	14656.1	14656.1	0	70526.1	17926.4	70475.9	76.8534	60239.4	30995.9	176899	569.589	414.028	155.126	228.009	94.7892	131.455	4518.78
Max	Comoros	COM	LIC	Africa	Sub-Saharan Africa	Eastern Africa	Other Africa	805579	0.136719	298627	209837	209837	0	0	0	0	42352.5	178821	171167	317134	6723.92	313149	178821	227247	4918.1	223152	209837	28592.2	171167	42352.5	0	0	28592.2	28592.2	0	150211	63990.7	150112	300.873	149483	86489.1	268144	1247.17	909.599	337.571	751.146	379.419	506.505	12812.9
Mean	Cape Verde	CPV	LMC	Africa	Sub-Saharan Africa	Western Africa	Other Africa	581458	0.23938	204224	187715	187715	0	0	0	0	32761.9	16508.6	154953	219386	1232.03	218154	16508.6	201646	998.963	200647	187715	12931.9	154953	32761.9	0	0	12931.9	12931.9	0	125636	29317.2	125507	129.067	9092.53	7416.04	173693	215.69	156.982	58.7084	112.795	47.1749	65.6198	3931.29
Min	Cape Verde	CPV	LMC	Africa	Sub-Saharan Africa	Western Africa	Other Africa	581458	0.23938	140918	129444	129444	0	0	0	0	22017.5	9864.98	98576.3	151721	873.136	150826	9864.98	137892	541.424	137045	129444	3982.3	98576.3	22017.5	0	0	3982.3	3982.3	0	69856.6	7508.28	69799.1	30.4476	4472.75	3690.27	114156	153.201	111.45	41.751	45.6316	18.0193	27.6123	974.851
Lower quartile	Cape Verde	CPV	LMC	Africa	Sub-Saharan Africa	Western Africa	Other Africa	581458	0.23938	189998	173521	173521	0	0	0	0	30178	15088	141004	204889	1155.83	203719	15088	187337	881.073	186439	173521	10221.7	141004	30178	0	0	10221.7	10221.7	0	112511	21364.9	112375	92.7933	7986.15	6397.23	159522	202.095	147.128	54.9085	96.2049	39.4795	55.3512	2952.69
Median	Cape Verde	CPV	LMC	Africa	Sub-Saharan Africa	Western Africa	Other Africa	581458	0.23938	204499	188114	188114	0	0	0	0	32528.7	16421.6	155568	219558	1224.52	218390	16421.6	202036	985.504	201060	188114	12444.8	155568	32528.7	0	0	12444.8	12444.8	0	124970	27809.5	124838	120.55	9010.36	7319.85	174150	214.374	156.05	58.3443	110.208	45.784	63.9751	3679.6
Upper quartile	Cape Verde	CPV	LMC	Africa	Sub-Saharan Africa	Western Africa	Other Africa	581458	0.23938	217177	200254	200254	0	0	0	0	35052.7	17798.4	167013	232789	1302.85	231518	17798.4	214510	1100.09	213431	200254	15133.8	167013	35052.7	0	0	15133.8	15133.8	0	137842	35669.6	137736	156.174	10092.8	8332.86	186170	228.623	166.534	62.2153	126.171	53.352	73.748	4641.86
Max	Cape Verde	CPV	LMC	Africa	Sub-Saharan Africa	Western Africa	Other Africa	581458	0.23938	275820	253244	253244	0	0	0	0	44875.1	25177.4	218528	292618	1701.96	290975	25177.4	269332	1847.65	267782	253244	28361	218528	44875.1	0	0	28361	28361	0	197575	91600.2	197427	411.184	15588.4	13139.7	241167	299.178	215.714	83.4644	263.892	112.856	162.984	11266.2
Mean	Costa Rica	CRI	UMC	Americas	Latin America and the Caribbean	Central America	Other OECD America	5.12136e+06	0.258956	1.7227e+06	1.52226e+06	1.50732e+06	14943.6	0	0	14943.6	1.49643e+06	200436	10890.1	1.8706e+06	7101.95	1.8635e+06	200436	1.66306e+06	5230.79	1.65783e+06	1.50732e+06	150512	10890.1	1.49643e+06	0	0	150512	135568	14943.6	8812.12	2077.96	8803.05	9.06886	55383.5	145052	223659	1242.76	904.499	338.258	593.026	263.259	329.767	41143.3
Min	Costa Rica	CRI	UMC	Americas	Latin America and the Caribbean	Central America	Other OECD America	5.12136e+06	0.258956	1.51211e+06	1.3433e+06	1.32769e+06	8296.99	0	0	8296.99	1.31721e+06	151797	6211.9	1.64701e+06	5691.82	1.64122e+06	151797	1.47687e+06	3845.04	1.47255e+06	1.32769e+06	97472.4	6211.9	1.31721e+06	0	0	97472.4	84217.7	8296.99	4874.09	890.635	4868.5	4.53798	38426.5	108318	171203	988.279	719.612	268.667	411.228	181.377	229.851	24561
Lower quartile	Costa Rica	CRI	UMC	Americas	Latin America and the Caribbean	Central America	Other OECD America	5.12136e+06	0.258956	1.67654e+06	1.48488e+06	1.47004e+06	13008.7	0	0	13008.7	1.45953e+06	189591	9787.81	1.82332e+06	6790.06	1.81661e+06	189591	1.62339e+06	4906.93	1.61832e+06	1.47004e+06	138903	9787.81	1.45953e+06	0	0	138903	124079	13008.7	7898.39	1763.22	7890.08	7.71364	51620.4	136679	211740	1186.67	864.249	322.985	548.014	242.839	304.864	36953
Median	Costa Rica	CRI	UMC	Americas	Latin America and the Caribbean	Central America	Other OECD America	5.12136e+06	0.258956	1.7207e+06	1.52077e+06	1.50594e+06	14709.7	0	0	14709.7	1.49494e+06	199549	10795.6	1.86818e+06	7077.9	1.861e+06	199549	1.661e+06	5211.02	1.65589e+06	1.50594e+06	149643	10795.6	1.49494e+06	0	0	149643	134599	14709.7	8728.37	2034.77	8718.98	8.81377	54943.1	144182	222670	1238.6	901.395	337.072	588.518	261.092	327.038	40645.8
Upper quartile	Costa Rica	CRI	UMC	Americas	Latin America and the Caribbean	Central America	Other OECD America	5.12136e+06	0.258956	1.76687e+06	1.55752e+06	1.54248e+06	16599.4	0	0	16599.4	1.53096e+06	210644	11872.7	1.91573e+06	7396.09	1.90842e+06	210644	1.70003e+06	5522.14	1.69477e+06	1.54248e+06	161072	11872.7	1.53096e+06	0	0	161072	145989	16599.4	9625.83	2337.6	9616.41	10.1756	58627	152753	234770	1294.06	942.178	352.276	633.491	281.054	352.277	44780.2
Max	Costa Rica	CRI	UMC	Americas	Latin America and the Caribbean	Central America	Other OECD America	5.12136e+06	0.258956	1.96364e+06	1.71814e+06	1.6998e+06	27474.9	0	0	27474.9	1.68718e+06	260506	17980	2.14371e+06	8668.58	2.13514e+06	260506	1.88276e+06	7121.86	1.87595e+06	1.6998e+06	217303	17980	1.68718e+06	0	0	217303	199969	27474.9	15220.1	5232.69	15203.7	18.8278	75546.8	191700	288701	1531.28	1113.99	418.688	897.196	410.955	492.259	70012.5
Mean	Cuba	CUB	UMC	Americas	Latin America and the Caribbean	Caribbean	Latin America	1.12905e+07	0.17663	4.55285e+06	4.1632e+06	4.10136e+06	52124.2	9712.16	0	61836.3	4.06198e+06	389650	39379.7	4.91572e+06	14493.9	4.90123e+06	389650	4.51158e+06	15339.9	4.49624e+06	4.10136e+06	394871	39379.7	4.06198e+06	9712.16	0	385159	333035	52124.2	31807.6	7572.03	31774.8	32.8167	129076	260574	458863	2536.28	1846.05	690.227	1669.92	741.36	928.565	101104
Min	Cuba	CUB	UMC	Americas	Latin America and the Caribbean	Caribbean	Latin America	1.12905e+07	0.17663	3.74725e+06	3.39789e+06	3.35117e+06	28039.5	4254.01	0	36059.8	3.31523e+06	330213	33596.6	4.06747e+06	12356.2	4.05457e+06	330213	3.70521e+06	12009.5	3.6913e+06	3.35117e+06	263437	33596.6	3.31523e+06	4254.01	0	253679	214728	28039.5	22066.6	3425.89	22044.8	15.1663	105723	216552	391467	2176.86	1585.23	591.629	1257.57	553.739	703.833	62638.5
Lower quartile	Cuba	CUB	UMC	Americas	Latin America and the Caribbean	Caribbean	Latin America	1.12905e+07	0.17663	4.4134e+06	4.02888e+06	3.96885e+06	45301.2	8272.96	0	54786.2	3.9298e+06	378114	38085.5	4.76712e+06	14099	4.75274e+06	378114	4.37163e+06	14678.1	4.35651e+06	3.96885e+06	355261	38085.5	3.9298e+06	8272.96	0	345777	293661	45301.2	30157.4	5907.05	30126.9	25.3436	124332	252557	446109	2463.9	1793.11	670.892	1588.38	704.253	883.131	87422.1
Median	Cuba	CUB	UMC	Americas	Latin America and the Caribbean	Caribbean	Latin America	1.12905e+07	0.17663	4.55103e+06	4.16149e+06	4.09942e+06	51201.8	9527.21	0	60904.8	4.06006e+06	389748	39373.6	4.91411e+06	14488.5	4.89963e+06	389748	4.50815e+06	15285.8	4.49298e+06	4.09942e+06	385680	39373.6	4.06006e+06	9527.21	0	375959	323367	51201.8	31972.1	7212.21	31942.6	30.8328	128951	260567	459104	2534.84	1845.02	689.912	1664.11	738.669	925.595	97448.4
Upper quartile	Cuba	CUB	UMC	Americas	Latin America and the Caribbean	Caribbean	Latin America	1.12905e+07	0.17663	4.69301e+06	4.29502e+06	4.23125e+06	57947.7	10913.6	0	67679.5	4.19158e+06	401121	40613.6	5.05731e+06	14887.8	5.04281e+06	401121	4.64471e+06	15972.7	4.62891e+06	4.23125e+06	426606	40613.6	4.19158e+06	10913.6	0	417066	363630	57947.7	33676.1	8980.11	33643.7	38.4426	133740	268559	471783	2606.75	1897.63	709.397	1749.75	776.825	972.626	110484
Max	Cuba	CUB	UMC	Americas	Latin America and the Caribbean	Caribbean	Latin America	1.12905e+07	0.17663	5.21947e+06	4.79209e+06	4.73114e+06	95944	18481.4	0	105918	4.68723e+06	448621	46931.7	5.61551e+06	16739.2	5.60059e+06	448621	5.19562e+06	19667.4	5.18045e+06	4.73114e+06	638416	46931.7	4.68723e+06	18481.4	0	630535	579537	95944	39731.1	16860.9	39675.2	79.222	153035	301342	522657	2956.28	2160.49	795.789	2159.59	975.298	1209.44	224012
Mean	Curaçao	CUW	HIC	Americas	Latin America and the Caribbean	Caribbean	Latin America	189099	0.0490709	107979	107321	99966.7	7354.72	0	0	7354.72	99966.7	657.964	0	108165	33.2146	108132	657.964	107474	50.4734	107423	99966.7	7456.75	0	99966.7	0	0	7456.75	102.03	7354.72	0	0	0	0	434.348	223.616	741.652	5.80968	4.22916	1.58052	7.36811	4.52696	2.84115	2.35743
Min	Curaçao	CUW	HIC	Americas	Latin America and the Caribbean	Caribbean	Latin America	189099	0.0490709	22086.8	22086.8	15960	0	0	0	0	15960	0	0	22247.1	3.88241	22241.3	0	22241.3	1.94199	22237.9	15960	30.2261	0	15960	0	0	30.2261	29.7117	0	0	0	0	0	0	0	7.61369	0.610007	0.446497	0.16351	0.208578	0.13961	0.0689683	0.062357
Lower quartile	Curaçao	CUW	HIC	Americas	Latin America and the Caribbean	Caribbean	Latin America	189099	0.0490709	75233.1	74542.9	68048.3	0	0	0	0	68048.3	0	0	75351.3	19.8788	75333.9	0	74697.8	24.782	74654.3	68048.3	126.399	0	68048.3	0	0	126.399	67.4342	0	0	0	0	0	0	0	57.0352	3.49087	2.52879	0.944259	3.18441	1.93805	1.15735	1.32133
Median	Curaçao	CUW	HIC	Americas	Latin America and the Caribbean	Caribbean	Latin America	189099	0.0490709	101461	100771	94211	2478.21	0	0	2478.21	94211	0	0	101676	29.3049	101646	0	100918	41.1598	100878	94211	2591.37	0	94211	0	0	2591.37	101.857	2478.21	0	0	0	0	0	0	100.215	5.10165	3.72343	1.39252	5.60842	3.43604	2.07064	2.12215
Upper quartile	Curaçao	CUW	HIC	Americas	Latin America and the Caribbean	Caribbean	Latin America	189099	0.0490709	144254	142874	130808	11405.1	0	0	11405.1	130808	1145.75	0	144371	42.7628	144341	1145.75	143023	65.5313	142963	130808	11516.5	0	130808	0	0	11516.5	136.504	11405.1	0	0	0	0	673.453	187.357	1191.34	7.48276	5.46194	2.03434	9.62482	5.93741	3.72878	3.17361
Max	Curaçao	CUW	HIC	Americas	Latin America and the Caribbean	Caribbean	Latin America	189099	0.0490709	216036	213966	213966	58166.7	0	0	58166.7	213966	10594.8	0	216219	166.751	216179	10594.8	214148	404.136	214060	213966	58278.2	0	213966	0	0	58278.2	182.235	58166.7	0	0	0	0	7381.87	6533.91	10666.6	30.1496	22.4845	7.66509	84.8281	61.3879	26.0029	7.24757
Mean	Christmas Island	CXR	UMC	Oceania	Australia and New Zealand	NA	OECD Oceania	3042.67	1	1018.21	529.656	515.453	14.2025	0	0	14.2025	497.897	488.55	17.5564	1034.78	12.0521	1022.72	488.55	534.175	4.51917	529.656	515.453	14.2025	17.5564	497.897	0	0	14.2025	0	14.2025	14.192	3.36445	14.1776	0.0143678	87.1856	401.364	522.677	2.1054	1.53215	0.573251	0.414654	0.184374	0.230279	0
Min	Christmas Island	CXR	UMC	Oceania	Australia and New Zealand	NA	OECD Oceania	3042.67	1	11.1057	4.59445	4.35416	0	0	0	0	4.30539	6.5113	0	11.2657	0.142333	11.1234	6.5113	4.61207	0.0176248	4.59445	4.35416	0	0	4.30539	0	0	0	0	0	0	0	0	0	0.916875	5.59442	6.72002	0.0258334	0.0192366	0.00659683	0.000654769	0.00027228	0.000361043	0
Lower quartile	Christmas Island	CXR	UMC	Oceania	Australia and New Zealand	NA	OECD Oceania	3042.67	1	588.604	303.433	293.959	0	0	0	0	283.907	278.645	5.18454	598.633	6.8869	591.549	278.645	305.955	2.10258	303.433	293.959	0	5.18454	283.907	0	0	0	0	0	4.11817	0.595629	4.11603	0.00255538	42.2954	226.551	298.921	1.20472	0.87727	0.326634	0.123399	0.0545374	0.0677696	0
Median	Christmas Island	CXR	UMC	Oceania	Australia and New Zealand	NA	OECD Oceania	3042.67	1	899.565	461.698	451.396	1.39456	0	0	1.39456	435.467	425.399	12.4196	911.207	10.53	900.904	425.399	466.367	3.59038	461.698	451.396	1.39456	12.4196	435.467	0	0	1.39456	0	1.39456	9.83643	1.75512	9.83063	0.0074104	70.4529	350.85	456.203	1.83252	1.33511	0.499007	0.266925	0.118403	0.148326	0
Upper quartile	Christmas Island	CXR	UMC	Oceania	Australia and New Zealand	NA	OECD Oceania	3042.67	1	1366.01	702.055	682.345	17.2344	0	0	17.2344	659.487	656.234	24.0294	1385.54	16.1055	1370.31	656.234	707.995	5.94453	702.055	682.345	17.2344	24.0294	659.487	0	0	17.2344	0	17.2344	19.6524	4.27788	19.6269	0.0181524	116.435	537.68	698.503	2.8004	2.04258	0.75872	0.531307	0.235887	0.292627	0
Max	Christmas Island	CXR	UMC	Oceania	Australia and New Zealand	NA	OECD Oceania	3042.67	1	3609.37	1966.87	1945.03	255.228	0	0	255.228	1923.83	1902.86	139.216	3662.58	48.8926	3613.68	1902.86	1979.15	24.8986	1966.87	1945.03	255.228	139.216	1923.83	0	0	255.228	0	255.228	115.295	46.5477	115.241	0.232529	491.667	1548.77	1984.23	8.3196	6.03798	2.28162	5.55514	2.473	3.08214	0
Mean	Cayman Islands	CYM	HIC	Americas	Latin America and the Caribbean	Caribbean	Latin America	66862.3	0.0762431	39338.5	39206.7	30800.6	8082.87	323.267	0	8406.14	30800.6	131.839	0	39438.6	33.7493	39404.8	131.839	39273	31.1694	39241.8	30800.6	8441.26	0	30800.6	323.267	0	8117.99	35.1155	8082.87	0	0	0	0	86.2766	45.5623	196.758	5.91201	4.30199	1.61003	4.17036	2.57083	1.59953	0.808301
Min	Cayman Islands	CYM	HIC	Americas	Latin America and the Caribbean	Caribbean	Latin America	66862.3	0.0762431	16112.8	16112.8	12108	114.753	0	0	219.752	12108	0	0	16170.3	13.3202	16149.1	0	16149.1	8.22272	16133.5	12108	257.597	0	12108	0	0	151.611	12.0927	114.753	0	0	0	0	0	0	26.8927	2.21381	1.60229	0.611526	0.862593	0.516104	0.298834	0.157705
Lower quartile	Cayman Islands	CYM	HIC	Americas	Latin America and the Caribbean	Caribbean	Latin America	66862.3	0.0762431	32433	32341.2	24739.4	4796.95	0	0	5098.31	24739.4	2.27427	0	32526.4	26.5443	32499.7	2.27427	32396.6	22.0058	32371.7	24739.4	5141.61	0	24739.4	0	0	4833.73	27.4592	4796.95	0	0	0	0	1.21942	0.366131	68.3926	4.63557	3.37695	1.26154	2.69429	1.65066	1.0196	0.575036
Median	Cayman Islands	CYM	HIC	Americas	Latin America and the Caribbean	Caribbean	Latin America	66862.3	0.0762431	38435.3	38301.6	29844.1	7448.48	37.2768	0	7769.75	29844.1	26.338	0	38537.9	32.5983	38499.2	26.338	38365	28.7819	38328.1	29844.1	7802.85	0	29844.1	37.2768	0	7485.88	35.0512	7448.48	0	0	0	0	16.8794	8.18805	100.65	5.68787	4.14116	1.55251	3.71955	2.28594	1.40437	0.757616
Upper quartile	Cayman Islands	CYM	HIC	Americas	Latin America and the Caribbean	Caribbean	Latin America	66862.3	0.0762431	45778.9	45651.2	35978.9	10659.7	292.481	0	11009.7	35978.9	178.65	0	45892.4	39.5719	45848.9	178.65	45711.4	37.8218	45674.9	35978.9	11043.5	0	35978.9	292.481	0	10695.1	42.746	10659.7	0	0	0	0	113.89	49.0414	244.591	6.9356	5.05107	1.88744	5.08437	3.15405	1.96309	1.0019
Max	Cayman Islands	CYM	HIC	Americas	Latin America and the Caribbean	Caribbean	Latin America	66862.3	0.0762431	69999.4	69999.4	64676.6	27655.3	6440.1	0	27655.3	64676.6	1135.73	0	70098.2	87.2965	70060.1	1135.73	70060.1	137.319	70041.5	64676.6	27678.8	0	64676.6	6440.1	0	27678.8	59.0532	27655.3	0	0	0	0	965.656	621.751	1219.5	15.1579	10.7812	4.37666	27.4216	15.1326	12.2889	2.16931
Mean	Cyprus	CYP	HIC	Asia	Western Asia	NA	Other EU	879135	0.231153	508747	508747	444272	64474.6	0	0	64474.6	444272	0	0	509780	294.067	509486	0	509486	352.022	509134	444272	64861.2	0	444272	0	0	64861.2	386.639	64474.6	0	0	0	0	0	0	646.089	51.4892	37.4772	14.012	48.4561	29.9132	18.5429	8.88507
Min	Cyprus	CYP	HIC	Asia	Western Asia	NA	Other EU	879135	0.231153	238817	238817	184468	1671.24	0	0	1671.24	184468	0	0	239718	129.974	239544	0	239544	112.148	239319	184468	1905.25	0	184468	0	0	1905.25	158.472	1671.24	0	0	0	0	0	0	246.611	22.4251	16.4596	5.96543	14.0051	8.28731	4.80328	1.6205
Lower quartile	Cyprus	CYP	HIC	Asia	Western Asia	NA	Other EU	879135	0.231153	437376	437376	378533	39967	0	0	39967	378533	0	0	438289	247.35	438072	0	438072	269.775	437736	378533	40346.9	0	378533	0	0	40346.9	326.563	39967	0	0	0	0	0	0	528.353	43.2893	31.5678	11.7596	35.5286	21.8688	13.2951	6.83811
Median	Cyprus	CYP	HIC	Asia	Western Asia	NA	Other EU	879135	0.231153	502147	502147	435914	59083	0	0	59083	435914	0	0	503136	289.603	502893	0	502893	337.866	502520	435914	59457.7	0	435914	0	0	59457.7	387.482	59083	0	0	0	0	0	0	628.83	50.4247	36.7567	13.7411	45.803	28.1162	17.4406	8.63509
Upper quartile	Cyprus	CYP	HIC	Asia	Western Asia	NA	Other EU	879135	0.231153	573719	573719	501215	83443	0	0	83443	501215	0	0	574824	333.604	574486	0	574486	415.277	574166	501215	83829.1	0	501215	0	0	83829.1	447.186	83443	0	0	0	0	0	0	740.123	58.6518	42.6868	15.9951	58.3984	36.1176	22.3145	10.6473
Max	Cyprus	CYP	HIC	Asia	Western Asia	NA	Other EU	879135	0.231153	833111	833111	751301	231171	0	0	231171	751301	0	0	834314	544.909	833921	0	833921	925.343	833489	751301	231623	0	751301	0	0	231623	632.579	231171	0	0	0	0	0	0	1417.69	100.963	73.7424	27.4108	193.067	132.204	73.8442	20.592
Mean	Czech Republic	CZE	HIC	Europe	Eastern Europe	NA	OECD EU countries	1.05363e+07	0.398556	4.95593e+06	4.95527e+06	4.06998e+06	776634	6.34189	108647	885288	4.06998e+06	665.838	0	4.96954e+06	4491.63	4.96505e+06	665.838	4.96438e+06	5513.7	4.95887e+06	4.06998e+06	888887	0	4.06998e+06	6.34189	108647	780234	3599.55	776634	0	0	0	0	441.334	224.504	10671.2	786.08	572.137	213.943	646.814	398.875	247.939	82.6652
Min	Czech Republic	CZE	HIC	Europe	Eastern Europe	NA	OECD EU countries	1.05363e+07	0.398556	4.45474e+06	4.45462e+06	3.45642e+06	509609	0	0	509609	3.45642e+06	0	0	4.46673e+06	3690.21	4.46267e+06	0	4.46256e+06	4071.29	4.4577e+06	3.45642e+06	512688	0	3.45642e+06	0	0	512688	2629.98	509609	0	0	0	0	0	0	8130.51	637.212	463.042	174.17	448.23	274.11	173.14	49.6815
Lower quartile	Czech Republic	CZE	HIC	Europe	Eastern Europe	NA	OECD EU countries	1.05363e+07	0.398556	4.85449e+06	4.85392e+06	3.94016e+06	708879	0	4391.34	774151	3.94016e+06	0	0	4.8679e+06	4328.11	4.86341e+06	0	4.86288e+06	5224.41	4.85751e+06	3.94016e+06	777652	0	3.94016e+06	0	4391.34	712618	3326.61	708879	0	0	0	0	0	0	10002.6	757.859	551.508	206.019	602.699	370.989	230.279	74.0963
Median	Czech Republic	CZE	HIC	Europe	Eastern Europe	NA	OECD EU countries	1.05363e+07	0.398556	4.95057e+06	4.94945e+06	4.07234e+06	772031	0	44808.4	875248	4.07234e+06	497.944	0	4.9641e+06	4482.32	4.95961e+06	497.944	4.95859e+06	5499.45	4.95326e+06	4.07234e+06	878862	0	4.07234e+06	0	44808.4	775704	3601.54	772031	0	0	0	0	322.882	124.656	10560.4	783.913	570.429	213.37	643.832	396.679	246.046	81.4999
Upper quartile	Czech Republic	CZE	HIC	Europe	Eastern Europe	NA	OECD EU countries	1.05363e+07	0.398556	5.05321e+06	5.05231e+06	4.20016e+06	839072	0	194841	988103	4.20016e+06	1054.49	0	5.06701e+06	4647.97	5.06237e+06	1054.49	5.06161e+06	5782.31	5.05587e+06	4.20016e+06	991524	0	4.20016e+06	0	194841	842402	3867.43	839072	0	0	0	0	701.539	353.927	11252.8	813.438	592.332	221.389	684.874	423.501	263.614	90.0918
Max	Czech Republic	CZE	HIC	Europe	Eastern Europe	NA	OECD EU countries	1.05363e+07	0.398556	5.54492e+06	5.54492e+06	4.73801e+06	1.07826e+06	386.11	443577	1.31624e+06	4.73801e+06	4285.5	0	5.56018e+06	5441.98	5.55521e+06	4285.5	5.55521e+06	7437.32	5.54862e+06	4.73801e+06	1.32052e+06	0	4.73801e+06	386.11	443577	1.08215e+06	4723.91	1.07826e+06	0	0	0	0	3036.15	1981.18	14858.6	947.595	688.283	259.312	968.298	618.458	359.881	131.275
Mean	Germany	DEU	HIC	Europe	Western Europe	NA	OECD EU countries	8.33835e+07	0.269493	3.69747e+07	3.69747e+07	1.25527e+07	9.41225e+06	2.02447e+06	1.29853e+07	2.4422e+07	1.25527e+07	0	0	3.70618e+07	29251.4	3.70326e+07	0	3.70326e+07	23210.9	3.70094e+07	1.25527e+07	2.44567e+07	0	1.25527e+07	2.02447e+06	1.29853e+07	9.44694e+06	34692.3	9.41225e+06	0	0	0	0	0	0	52462.3	5118.38	3725.18	1393.2	2573.76	1588.4	985.36	798.094
Min	Germany	DEU	HIC	Europe	Western Europe	NA	OECD EU countries	8.33835e+07	0.269493	3.4846e+07	3.4846e+07	1.00332e+07	8.39885e+06	1.37725e+06	1.06195e+07	2.12967e+07	1.00332e+07	0	0	3.49287e+07	26336.6	3.49011e+07	0	3.49011e+07	20293.2	3.48791e+07	1.00332e+07	2.13288e+07	0	1.00332e+07	1.37725e+06	1.06195e+07	8.43268e+06	29725.4	8.39885e+06	0	0	0	0	0	0	47207.9	4586.33	3340.55	1245.78	2181.24	1335.58	826.735	659.79
Lower quartile	Germany	DEU	HIC	Europe	Western Europe	NA	OECD EU countries	8.33835e+07	0.269493	3.6541e+07	3.6541e+07	1.20431e+07	9.1816e+06	1.88407e+06	1.25174e+07	2.38606e+07	1.20431e+07	0	0	3.6627e+07	28672	3.65979e+07	0	3.65979e+07	22589	3.65751e+07	1.20431e+07	2.38958e+07	0	1.20431e+07	1.88407e+06	1.25174e+07	9.21708e+06	33763	9.1816e+06	0	0	0	0	0	0	51338.5	5017.15	3651.35	1365.14	2487.39	1533.47	951.02	766.78
Median	Germany	DEU	HIC	Europe	Western Europe	NA	OECD EU countries	8.33835e+07	0.269493	3.69816e+07	3.69816e+07	1.25409e+07	9.40505e+06	2.0185e+06	1.29812e+07	2.44305e+07	1.25409e+07	0	0	3.70684e+07	29228.6	3.7039e+07	0	3.7039e+07	23204.2	3.70163e+07	1.25409e+07	2.44658e+07	0	1.25409e+07	2.0185e+06	1.29812e+07	9.44053e+06	34700.7	9.40505e+06	0	0	0	0	0	0	52446	5115.41	3723.21	1392.41	2571.22	1586.41	983.52	796.856
Upper quartile	Germany	DEU	HIC	Europe	Western Europe	NA	OECD EU countries	8.33835e+07	0.269493	3.7405e+07	3.7405e+07	1.30631e+07	9.63639e+06	2.15949e+06	1.3469e+07	2.49856e+07	1.30631e+07	0	0	3.74934e+07	29818.1	3.74637e+07	0	3.74637e+07	23810	3.74398e+07	1.30631e+07	2.50209e+07	0	1.30631e+07	2.15949e+06	1.3469e+07	9.67034e+06	35617.3	9.63639e+06	0	0	0	0	0	0	53534.7	5218.17	3798.22	1420.36	2656.71	1639.59	1018.5	826.987
Max	Germany	DEU	HIC	Europe	Western Europe	NA	OECD EU countries	8.33835e+07	0.269493	3.93669e+07	3.93669e+07	1.52409e+07	1.07596e+07	2.82617e+06	1.55904e+07	2.80643e+07	1.52409e+07	0	0	3.94591e+07	32022.2	3.94281e+07	0	3.94281e+07	26689.5	3.9403e+07	1.52409e+07	2.80972e+07	0	1.52409e+07	2.82617e+06	1.55904e+07	1.0793e+07	39021.3	1.07596e+07	0	0	0	0	0	0	58454.6	5622.06	4100.29	1530.99	3191.81	1993.98	1197.83	983.996
Mean	Djibouti	DJI	LMC	Africa	Sub-Saharan Africa	Eastern Africa	Other Africa	1.08296e+06	0.101392	275250	122582	122582	0	0	0	0	0	152668	122582	306204	1909.9	304294	152668	151626	701.403	150925	122582	28342.9	122582	0	0	0	28342.9	28342.9	0	99308.1	23273.9	99204.3	103.788	87295.7	65371.9	277861	333.847	242.985	90.8617	76.5176	32.125	44.3926	8650.66
Min	Djibouti	DJI	LMC	Africa	Sub-Saharan Africa	Eastern Africa	Other Africa	1.08296e+06	0.101392	139793	28936.7	28936.7	0	0	0	0	0	18176.3	28936.7	164323	741.971	162778	18176.3	45912.4	111.976	45751	28936.7	4781.11	28936.7	0	0	0	4781.11	4781.11	0	22250.3	1695.32	22216.5	8.30568	10092	8084.25	141777	131.47	96.756	34.7141	9.06779	3.37564	5.41033	1338.57
Lower quartile	Djibouti	DJI	LMC	Africa	Sub-Saharan Africa	Eastern Africa	Other Africa	1.08296e+06	0.101392	243839	85156.4	85156.4	0	0	0	0	0	116573	85156.4	272840	1494.29	270942	116573	112541	451.049	111969	85156.4	17691.3	85156.4	0	0	0	17691.3	17691.3	0	67146.8	11376.5	67078.4	49.9554	54659.9	35652.6	246046	259.182	188.978	70.344	42.993	17.2177	24.4054	4900.67
Median	Djibouti	DJI	LMC	Africa	Sub-Saharan Africa	Eastern Africa	Other Africa	1.08296e+06	0.101392	278317	118448	118448	0	0	0	0	0	151409	118448	307522	1802.8	305561	151409	146627	618.112	145962	118448	24887.9	118448	0	0	0	24887.9	24887.9	0	94146.1	18365.7	94041.9	79.4355	79118.4	57325.7	280980	314.736	229.256	85.8632	62.0258	25.6849	35.8746	7284.51
Upper quartile	Djibouti	DJI	LMC	Africa	Sub-Saharan Africa	Eastern Africa	Other Africa	1.08296e+06	0.101392	307329	151893	151893	0	0	0	0	0	187256	151893	341658	2227.57	339675	187256	182518	854.331	181670	151893	36077.5	151893	0	0	0	36077.5	36077.5	0	123342	30453.5	123248	134.179	112872	87558.9	310063	389.176	283.297	106.015	94.8514	39.2552	54.6496	11091.1
Max	Djibouti	DJI	LMC	Africa	Sub-Saharan Africa	Eastern Africa	Other Africa	1.08296e+06	0.101392	420839	332702	332702	0	0	0	0	0	325445	332702	471310	5248	468597	325445	366730	3731.94	364268	332702	90171.5	332702	0	0	0	90171.5	90171.5	0	303126	190567	302650	901.857	300327	253648	425462	886.037	657.052	243.284	495.87	230.685	300.227	39091.6
Mean	Dominica	DMA	UMC	Americas	Latin America and the Caribbean	Caribbean	Latin America	71167.2	0.570394	26147.7	19441.9	19359.6	82.2694	0	0	82.2694	19077.8	6705.83	281.854	27578.8	219.983	27358.8	6705.83	20653	110.541	20542.4	19359.6	1182.81	281.854	19077.8	0	0	1182.81	1100.54	82.2694	227.744	54.1108	227.51	0.233997	1471.44	5234.4	7318.21	38.5282	28.0442	10.484	14.1589	6.28628	7.87259	332.95
Min	Dominica	DMA	UMC	Americas	Latin America and the Caribbean	Caribbean	Latin America	71167.2	0.570394	11807.1	8087.51	8073.44	0	0	0	0	7873.43	2801.51	64.841	13162.4	105.915	13053.1	2801.51	9765.11	40.1249	9699.69	8073.44	183.73	64.841	7873.43	0	0	183.73	170.766	0	52.1397	6.72858	52.0803	0.0275877	540.486	2152.93	3122.89	18.1414	13.1402	4.94749	3.56583	1.54229	2.02354	49.8845
Lower quartile	Dominica	DMA	UMC	Americas	Latin America and the Caribbean	Caribbean	Latin America	71167.2	0.570394	21719.4	15496.3	15454.2	9.54364	0	0	9.54364	15203.1	5693.39	209.698	23099.3	188.612	22900	5693.39	16721.8	87.9432	16630.3	15454.2	815.041	209.698	15203.1	0	0	815.041	745.574	9.54364	167.246	34.916	167.064	0.149889	1202.8	4417.51	6224.43	32.9369	24.0004	8.95683	10.1308	4.47163	5.61783	207.812
Median	Dominica	DMA	UMC	Americas	Latin America and the Caribbean	Caribbean	Latin America	71167.2	0.570394	25758	18808.9	18743.6	32.8463	0	0	32.8463	18444.2	6615.44	270.165	27149.1	218.201	26911.6	6615.44	20001.1	106.156	19880	18743.6	1098.61	270.165	18444.2	0	0	1098.61	1007.56	32.8463	216.446	48.9789	216.242	0.211922	1440.88	5143.7	7229.15	38.2628	27.8403	10.3952	13.0667	5.79541	7.23457	295.947
Upper quartile	Dominica	DMA	UMC	Americas	Latin America and the Caribbean	Caribbean	Latin America	71167.2	0.570394	30417	23367.2	23242	107.423	0	0	107.423	22926.9	7630.44	342.143	31851.5	249.58	31599.4	7630.44	24544	129.608	24408.3	23242	1461.02	342.143	22926.9	0	0	1461.02	1366.47	107.423	277.401	67.0871	276.957	0.292893	1707.76	5999.44	8324.64	43.8087	31.9071	11.9238	17.0708	7.58336	9.50799	415.818
Max	Dominica	DMA	UMC	Americas	Latin America and the Caribbean	Caribbean	Latin America	71167.2	0.570394	49001.4	38821.8	38809.6	1034.36	0	0	1034.36	38441	12165.6	819.577	51061.6	380.671	50705.9	12165.6	40526.4	283.26	40337.4	38809.6	3662.19	819.577	38441	0	0	3662.19	3443.87	1034.36	713.101	257.865	712.482	1.13501	3065.15	10296.9	13313.5	67.19	49.414	18.0029	53.0959	24.3207	28.7752	1463.95
Mean	Denmark	DNK	HIC	Europe	Northern Europe	NA	OECD EU countries	5.81009e+06	0.351534	2.75766e+06	2.75766e+06	1.30572e+06	518822	39977.7	893138	1.45194e+06	1.30572e+06	0	0	2.76381e+06	2404.99	2.76141e+06	0	2.76141e+06	1597.37	2.75981e+06	1.30572e+06	1.45409e+06	0	1.30572e+06	39977.7	893138	520973	2151.01	518822	0	0	0	0	0	0	4002.36	420.814	306.278	114.536	186.514	115.103	71.4108	49.4862
Min	Denmark	DNK	HIC	Europe	Northern Europe	NA	OECD EU countries	5.81009e+06	0.351534	2.28605e+06	2.28605e+06	841499	315227	1140.5	437675	945148	841499	0	0	2.29156e+06	1901.43	2.2895e+06	0	2.2895e+06	1180.7	2.28823e+06	841499	947192	0	841499	1140.5	437675	317572	1597.36	315227	0	0	0	0	0	0	3168.58	333.682	242.513	91.1686	127.159	75.9553	49.5948	28.9408
Lower quartile	Denmark	DNK	HIC	Europe	Northern Europe	NA	OECD EU countries	5.81009e+06	0.351534	2.66494e+06	2.66494e+06	1.19395e+06	472006	24941.6	800025	1.345e+06	1.19395e+06	0	0	2.671e+06	2290.07	2.66855e+06	0	2.66855e+06	1496.93	2.66694e+06	1.19395e+06	1.34722e+06	0	1.19395e+06	24941.6	800025	474232	2014.34	472006	0	0	0	0	0	0	3798.08	400.505	291.556	108.871	172.178	106.067	65.6592	45.1846
Median	Denmark	DNK	HIC	Europe	Northern Europe	NA	OECD EU countries	5.81009e+06	0.351534	2.75423e+06	2.75423e+06	1.29798e+06	515562	35962.4	894654	1.4506e+06	1.29798e+06	0	0	2.7603e+06	2400.88	2.75805e+06	0	2.75805e+06	1591.46	2.75641e+06	1.29798e+06	1.45277e+06	0	1.29798e+06	35962.4	894654	517726	2151.94	515562	0	0	0	0	0	0	3994.85	419.781	305.687	114.282	184.932	114.148	70.8187	48.9689
Upper quartile	Denmark	DNK	HIC	Europe	Northern Europe	NA	OECD EU countries	5.81009e+06	0.351534	2.84887e+06	2.84887e+06	1.40906e+06	563831	50818.7	984109	1.55482e+06	1.40906e+06	0	0	2.85515e+06	2513.86	2.85255e+06	0	2.85255e+06	1690.24	2.85096e+06	1.40906e+06	1.557e+06	0	1.40906e+06	50818.7	984109	565912	2288.43	563831	0	0	0	0	0	0	4192.4	440.075	320.025	119.916	199.498	123.31	76.5425	53.3429
Max	Denmark	DNK	HIC	Europe	Northern Europe	NA	OECD EU countries	5.81009e+06	0.351534	3.30248e+06	3.30248e+06	2.02061e+06	790079	151850	1.36783e+06	1.99324e+06	2.02061e+06	0	0	3.30918e+06	3002.98	3.30646e+06	0	3.30646e+06	2280.09	3.30464e+06	2.02061e+06	1.99554e+06	0	2.02061e+06	151850	1.36783e+06	792351	2713.95	790079	0	0	0	0	0	0	5283.07	524.894	381.49	143.404	278.231	170.837	111.451	71.9079
Mean	Dominican Republic	DOM	UMC	Americas	Latin America and the Caribbean	Caribbean	Latin America	1.09939e+07	0.144277	3.37679e+06	2.68422e+06	2.68422e+06	0	0	0	0	2.13028e+06	692568	553935	3.73127e+06	9797.13	3.72148e+06	692568	3.02891e+06	9470.94	3.01944e+06	2.68422e+06	335219	553935	2.13028e+06	0	0	335219	335219	0	449200	104735	448742	458.196	249866	442702	1.26577e+06	1714.67	1248.02	466.658	1051.44	467.923	583.52	101843
Min	Dominican Republic	DOM	UMC	Americas	Latin America and the Caribbean	Caribbean	Latin America	1.09939e+07	0.144277	3.04022e+06	2.37518e+06	2.37518e+06	0	0	0	0	1.82199e+06	600281	551053	3.35288e+06	8013.78	3.34363e+06	600281	2.67859e+06	7022.44	2.67057e+06	2.37518e+06	182618	551053	1.82199e+06	0	0	182618	182618	0	248504	6519.79	248394	38.3261	181907	356270	1.16983e+06	1394.87	1013.69	378.747	754.63	330.886	421.157	55131.8
Lower quartile	Dominican Republic	DOM	UMC	Americas	Latin America and the Caribbean	Caribbean	Latin America	1.09939e+07	0.144277	3.2916e+06	2.61288e+06	2.61288e+06	0	0	0	0	2.0592e+06	671987	553315	3.63929e+06	9391.08	3.62948e+06	671987	2.94977e+06	8862.89	2.94034e+06	2.61288e+06	298175	553315	2.0592e+06	0	0	298175	298175	0	415038	62612.8	414528	270.222	235484	424281	1.24464e+06	1644	1196.72	447.426	973.735	433.035	539.828	87952.7
Median	Dominican Republic	DOM	UMC	Americas	Latin America and the Caribbean	Caribbean	Latin America	1.09939e+07	0.144277	3.37066e+06	2.67962e+06	2.67962e+06	0	0	0	0	2.12572e+06	691253	553886	3.72403e+06	9775.99	3.71431e+06	691253	3.02278e+06	9403.35	3.01332e+06	2.67962e+06	331137	553886	2.12572e+06	0	0	331137	331137	0	458597	95241.3	458126	410.119	249766	441912	1.26473e+06	1710.71	1244.79	465.958	1044.86	464.958	579.721	99555.7
Upper quartile	Dominican Republic	DOM	UMC	Americas	Latin America and the Caribbean	Caribbean	Latin America	1.09939e+07	0.144277	3.45506e+06	2.74976e+06	2.74976e+06	0	0	0	0	2.19557e+06	712344	554512	3.81976e+06	10175	3.80962e+06	712344	3.10334e+06	10046.1	3.09393e+06	2.74976e+06	367565	554512	2.19557e+06	0	0	367565	367565	0	491227	139313	490603	598.213	264292	460332	1.28595e+06	1782.38	1297.93	485.165	1122.08	498.758	623.357	113127
Max	Dominican Republic	DOM	UMC	Americas	Latin America and the Caribbean	Caribbean	Latin America	1.09939e+07	0.144277	3.87805e+06	3.11667e+06	3.11667e+06	0	0	0	0	2.55948e+06	818069	557675	4.29193e+06	12157.8	4.28107e+06	818069	3.51043e+06	13628.8	3.4999e+06	3.11667e+06	544426	557675	2.55948e+06	0	0	544426	544426	0	546791	305651	546410	1594.54	327962	538982	1.39453e+06	2124.43	1542.39	582.036	1588.17	710.165	878.001	202304
Mean	Algeria	DZA	UMC	Africa	Northern Africa	NA	Middle East and North Africa	4.34383e+07	0.203504	1.11529e+07	9.38503e+06	9.32672e+06	0	58311.7	0	58311.7	3.43447e+06	1.76782e+06	5.89225e+06	1.24754e+07	40083.9	1.24353e+07	1.76782e+06	1.06675e+07	46540.9	1.0621e+07	9.32672e+06	1.29427e+06	5.89225e+06	3.43447e+06	58311.7	0	1.23595e+06	1.23595e+06	0	4.76532e+06	1.12693e+06	4.76042e+06	4894.65	618424	1.1494e+06	7.74669e+06	7014.62	5105.45	1909.17	5791.17	2570.56	3220.61	376068
Min	Algeria	DZA	UMC	Africa	Northern Africa	NA	Middle East and North Africa	4.34383e+07	0.203504	1.01012e+07	8.39218e+06	8.33216e+06	0	38786.5	0	38786.5	3.16529e+06	1.2337e+06	5.10725e+06	1.11795e+07	33262.8	1.11447e+07	1.2337e+06	9.55938e+06	34413.9	9.52099e+06	8.33216e+06	832094	5.10725e+06	3.16529e+06	38786.5	0	775463	775463	0	4.02524e+06	666953	4.02088e+06	2889.04	420585	758406	6.8259e+06	5792.95	4229.92	1563.03	3807.83	1705.5	2079.52	217221
Lower quartile	Algeria	DZA	UMC	Africa	Northern Africa	NA	Middle East and North Africa	4.34383e+07	0.203504	1.09613e+07	9.20351e+06	9.14618e+06	0	54571.3	0	54571.3	3.3796e+06	1.6575e+06	5.7401e+06	1.2259e+07	38963	1.22205e+07	1.6575e+06	1.04565e+07	43916.3	1.04107e+07	9.14618e+06	1.19324e+06	5.7401e+06	3.3796e+06	54571.3	0	1.13569e+06	1.13569e+06	0	4.60906e+06	1.03375e+06	4.60461e+06	4444.57	570546	1.07318e+06	7.5812e+06	6811.6	4956.86	1852.96	5340.25	2366.42	2968.24	339878
Median	Algeria	DZA	UMC	Africa	Northern Africa	NA	Middle East and North Africa	4.34383e+07	0.203504	1.11572e+07	9.38711e+06	9.32943e+06	0	58258.9	0	58258.9	3.43566e+06	1.76392e+06	5.89084e+06	1.2476e+07	40077.2	1.24361e+07	1.76392e+06	1.06668e+07	46411.1	1.06194e+07	9.32943e+06	1.28648e+06	5.89084e+06	3.43566e+06	58258.9	0	1.22776e+06	1.22776e+06	0	4.76141e+06	1.12262e+06	4.75647e+06	4875.45	616111	1.14662e+06	7.75004e+06	7014.43	5105.16	1907.84	5757.96	2556.32	3203.56	371887
Upper quartile	Algeria	DZA	UMC	Africa	Northern Africa	NA	Middle East and North Africa	4.34383e+07	0.203504	1.13509e+07	9.56944e+06	9.51159e+06	0	61931.1	0	61931.1	3.49021e+06	1.87676e+06	6.04865e+06	1.26986e+07	41196	1.26572e+07	1.87676e+06	1.08735e+07	49197.9	1.08268e+07	9.51159e+06	1.38711e+06	6.04865e+06	3.49021e+06	61931.1	0	1.32789e+06	1.32789e+06	0	4.91793e+06	1.21331e+06	4.91301e+06	5300.93	664934	1.22252e+06	7.919e+06	7220.17	5254.54	1964.93	6213.42	2761.26	3457.75	408306
Max	Algeria	DZA	UMC	Africa	Northern Africa	NA	Middle East and North Africa	4.34383e+07	0.203504	1.22224e+07	1.03768e+07	1.03219e+07	0	80221.6	0	80221.6	3.68708e+06	2.45655e+06	6.73837e+06	1.37347e+07	47731.1	1.3687e+07	2.45655e+06	1.18072e+07	61894.1	1.17577e+07	1.03219e+07	1.84499e+06	6.73837e+06	3.68708e+06	80221.6	0	1.79437e+06	1.79437e+06	0	5.64143e+06	1.78786e+06	5.63536e+06	7698.88	884803	1.57905e+06	8.68823e+06	8196.35	5976.64	2219.71	9068.71	4045.27	5023.44	611787
Mean	Ecuador	ECU	UMC	Americas	Latin America and the Caribbean	South America	Latin America	1.75807e+07	0.224756	6.23265e+06	5.52651e+06	5.50188e+06	20750.7	3880.72	0	24631.4	5.47454e+06	706133	27340.2	6.76232e+06	19348.9	6.74297e+06	706133	6.03684e+06	22515	6.01433e+06	5.50188e+06	512444	27340.2	5.47454e+06	3880.72	0	508563	487813	20750.7	22104.8	5235.47	22082.1	22.7038	222111	484022	775337	3386.43	2464.91	921.525	2624.85	1165.24	1459.61	147781
Min	Ecuador	ECU	UMC	Americas	Latin America and the Caribbean	South America	Latin America	1.75807e+07	0.224756	5.8487e+06	5.15658e+06	5.12529e+06	13243.2	0	0	13613.2	5.10255e+06	627812	19664.7	6.23991e+06	16617.2	6.22103e+06	627812	5.56949e+06	17572.7	5.54695e+06	5.12529e+06	293963	19664.7	5.10255e+06	0	0	293925	277583	13243.2	15919.2	3089.26	15904.1	14.1355	173964	418234	696659	2905.94	2116.72	789.224	1875.33	820.987	1051.43	74549.4
Lower quartile	Ecuador	ECU	UMC	Americas	Latin America and the Caribbean	South America	Latin America	1.75807e+07	0.224756	6.1511e+06	5.45623e+06	5.43118e+06	16512.2	52.9751	0	17304.4	5.40391e+06	690396	25818.6	6.65294e+06	18781.1	6.63397e+06	690396	5.93549e+06	21111	5.91324e+06	5.43118e+06	441764	25818.6	5.40391e+06	52.9751	0	437512	417202	16512.2	20828.5	4794.67	20807	20.7776	213447	470974	758399	3283.35	2389.93	893.118	2420.23	1073.53	1343.6	122583
Median	Ecuador	ECU	UMC	Americas	Latin America and the Caribbean	South America	Latin America	1.75807e+07	0.224756	6.23236e+06	5.52691e+06	5.50184e+06	18167.7	184.778	0	23276.7	5.47465e+06	705518	27274.7	6.75798e+06	19328.6	6.73863e+06	705518	6.03199e+06	22365.8	6.00964e+06	5.50184e+06	501194	27274.7	5.47465e+06	184.778	0	497975	476855	18167.7	22051.7	5208.61	22029.7	22.5614	221795	483588	775071	3382.32	2461.99	920.141	2596.48	1152.12	1443.34	141920
Upper quartile	Ecuador	ECU	UMC	Americas	Latin America and the Caribbean	South America	Latin America	1.75807e+07	0.224756	6.31238e+06	5.59674e+06	5.57289e+06	25098.7	3732.72	0	28889.3	5.5448e+06	721074	28863.2	6.86459e+06	19887.9	6.84491e+06	721074	6.12998e+06	23737.8	6.10684e+06	5.57289e+06	570308	28863.2	5.5448e+06	3732.72	0	566349	545016	25098.7	23326.6	5634.64	23302.7	24.4603	230822	496950	791434	3481.58	2533.68	947.472	2800.58	1241.81	1558.07	166673
Max	Ecuador	ECU	UMC	Americas	Latin America and the Caribbean	South America	Latin America	1.75807e+07	0.224756	6.66722e+06	5.88202e+06	5.85522e+06	46794.1	53413.3	0	81321.6	5.82673e+06	789770	38490.3	7.3941e+06	23376.5	7.37294e+06	789770	6.65059e+06	35732.9	6.62499e+06	5.85522e+06	959171	38490.3	5.82673e+06	53413.3	0	931810	908332	46794.1	31043.5	7723.98	31011.9	35.168	266473	551742	865753	4007.14	2906.51	1100.63	4332.06	1907.53	2424.53	340808
Mean	Egypt	EGY	LMC	Africa	Northern Africa	NA	Middle East and North Africa	1.07437e+08	0.0312695	3.1876e+07	2.77107e+07	2.77019e+07	0	8782.76	0	8782.76	2.55527e+06	4.1653e+06	2.51466e+07	3.52217e+07	127095	3.50946e+07	4.1653e+06	3.09293e+07	160975	3.07683e+07	2.77019e+07	3.06645e+06	2.51466e+07	2.55527e+06	8782.76	0	3.05766e+06	3.05766e+06	0	2.03339e+07	4.81267e+06	2.0313e+07	20963.1	2.37374e+06	1.79156e+06	2.96e+07	22239.2	16186.6	6052.52	14917.8	6015.55	8902.3	929438
Min	Egypt	EGY	LMC	Africa	Northern Africa	NA	Middle East and North Africa	1.07437e+08	0.0312695	3.00884e+07	2.60917e+07	2.60742e+07	0	0	0	0	2.51579e+06	3.73312e+06	2.35333e+07	3.32457e+07	107853	3.31174e+07	3.73312e+06	2.91215e+07	128575	2.89742e+07	2.60742e+07	2.25335e+06	2.35333e+07	2.51579e+06	0	0	2.25335e+06	2.25335e+06	0	1.76505e+07	3.39729e+06	1.76356e+07	14689.6	986525	406998	2.77997e+07	18973.3	13815.9	5157.36	11502.1	4614.72	6722.86	649983
Lower quartile	Egypt	EGY	LMC	Africa	Northern Africa	NA	Middle East and North Africa	1.07437e+08	0.0312695	3.15847e+07	2.7412e+07	2.74053e+07	0	0	0	0	2.55845e+06	4.05875e+06	2.48496e+07	3.48466e+07	122149	3.4721e+07	4.05875e+06	3.05491e+07	153298	3.03888e+07	2.74053e+07	2.84499e+06	2.48496e+07	2.55845e+06	0	0	2.83752e+06	2.83752e+06	0	1.99109e+07	4.36676e+06	1.98892e+07	18992.1	1.91547e+06	1.33825e+06	2.93071e+07	21338.6	15528	5805.86	14161.9	5720.11	8410.7	849070
Median	Egypt	EGY	LMC	Africa	Northern Africa	NA	Middle East and North Africa	1.07437e+08	0.0312695	3.18836e+07	2.77201e+07	2.77129e+07	0	0	0	0	2.55845e+06	4.15544e+06	2.5156e+07	3.522e+07	126525	3.50924e+07	4.15544e+06	3.09263e+07	160091	3.07663e+07	2.77129e+07	3.03675e+06	2.5156e+07	2.55845e+06	0	0	3.02869e+06	3.02869e+06	0	2.03863e+07	4.7419e+06	2.03654e+07	20551.9	2.35845e+06	1.80362e+06	2.96081e+07	22121.9	16104.2	6018.89	14879.6	5996.92	8867.05	916071
Upper quartile	Egypt	EGY	LMC	Africa	Northern Africa	NA	Middle East and North Africa	1.07437e+08	0.0312695	3.21694e+07	2.80227e+07	2.80135e+07	0	9040.87	0	9040.87	2.55845e+06	4.26468e+06	2.54594e+07	3.55937e+07	131643	3.54634e+07	4.26468e+06	3.13072e+07	168007	3.11429e+07	2.80135e+07	3.2589e+06	2.54594e+07	2.55845e+06	9040.87	0	3.25047e+06	3.25047e+06	0	2.08145e+07	5.2051e+06	2.07934e+07	22516.6	2.83835e+06	2.24808e+06	2.9896e+07	23061.6	16780.2	6274.91	15627	6287.63	9358.96	997730
Max	Egypt	EGY	LMC	Africa	Northern Africa	NA	Middle East and North Africa	1.07437e+08	0.0312695	3.33985e+07	2.93246e+07	2.93246e+07	0	114986	0	114986	2.55845e+06	4.80725e+06	2.67662e+07	3.6959e+07	152277	3.68156e+07	4.80725e+06	3.27689e+07	209131	3.25874e+07	2.93246e+07	4.4541e+06	2.67662e+07	2.55845e+06	114986	0	4.4541e+06	4.4541e+06	0	2.24684e+07	7.4304e+06	2.24388e+07	32933.5	3.81732e+06	3.20629e+06	3.10856e+07	27014.1	19674.8	7339.32	19078.1	7752.59	11883.6	1.55816e+06
Mean	Eritrea	ERI	LIC	Africa	Sub-Saharan Africa	Eastern Africa	Other Africa	3.53074e+06	0.347568	602907	223220	223220	0	0	0	0	0	379687	223220	657847	10772.3	647074	379687	267387	5017.02	262370	223220	39149.9	223220	0	0	0	39149.9	39149.9	0	180640	42580.1	180455	185.444	268540	111148	618697	1884.27	1371.34	512.931	488.946	204.388	284.558	11884.5
Min	Eritrea	ERI	LIC	Africa	Sub-Saharan Africa	Eastern Africa	Other Africa	3.53074e+06	0.347568	401614	113770	113770	0	0	0	0	0	199392	113770	450557	6497.44	443110	199392	148673	2317.86	146355	113770	20790.7	113770	0	0	0	20790.7	20790.7	0	84157.7	13220.8	84074.8	72.1443	149018	46851.2	413254	1134.61	822.081	312.526	175.144	78.8532	95.8761	6339.25
Lower quartile	Eritrea	ERI	LIC	Africa	Sub-Saharan Africa	Eastern Africa	Other Africa	3.53074e+06	0.347568	558325	188481	188481	0	0	0	0	0	340305	188481	612264	9848.73	602299	340305	231890	4245.63	227442	188481	34790.9	188481	0	0	0	34790.9	34790.9	0	152015	32953.8	151860	143.666	239908	93896.2	573164	1721.25	1251.87	468.554	386.043	158.477	222.802	10240.4
Median	Eritrea	ERI	LIC	Africa	Sub-Saharan Africa	Eastern Africa	Other Africa	3.53074e+06	0.347568	599559	218450	218450	0	0	0	0	0	376530	218450	655281	10677.2	644720	376530	262285	4862.38	257427	218450	38806.6	218450	0	0	0	38806.6	38806.6	0	176376	40219.5	176195	175.517	265543	108211	615541	1869.13	1359.19	508.772	463.52	192.654	269.298	11697
Upper quartile	Eritrea	ERI	LIC	Africa	Sub-Saharan Africa	Eastern Africa	Other Africa	3.53074e+06	0.347568	647092	251866	251866	0	0	0	0	0	415829	251866	702962	11614.1	691410	415829	297287	5645.85	291714	251866	43117	251866	0	0	0	43117	43117	0	204131	49539.4	203928	216.014	293575	125379	663827	2028.31	1476.56	552.256	560.666	234.407	328.638	13285.9
Max	Eritrea	ERI	LIC	Africa	Sub-Saharan Africa	Eastern Africa	Other Africa	3.53074e+06	0.347568	857507	440735	440735	0	0	0	0	0	592727	440735	927070	16123.4	912700	592727	487844	11506.8	480912	440735	64687.8	440735	0	0	0	64687.8	64687.8	0	373470	170463	372990	559.454	441848	211912	880666	2859.75	2101.13	789.498	1671.38	817.134	879.762	21683.1
Mean	Western Sahara	ESH	LMC	Africa	Northern Africa	NA	Middle East and North Africa	554837	0.0905517	132586	112608	112377	0	231.402	0	231.402	0	19978.3	112377	149074	787.298	148287	19978.3	128308	871.87	127437	112377	15059.9	112377	0	231.402	0	14828.5	14828.5	0	90803.1	21573.6	90710.5	92.6322	11417.2	8561.13	134014	137.819	100.333	37.4864	93.2914	39.1309	54.1606	4516.46
Min	Western Sahara	ESH	LMC	Africa	Northern Africa	NA	Middle East and North Africa	554837	0.0905517	60210.9	46876.4	46794.5	0	0	0	0	0	3459.39	46794.5	77001.4	321.887	76603.8	3459.39	55674.1	216.382	55234.6	46794.5	2644.93	46794.5	0	0	0	2644.93	2644.93	0	35628	2851.63	35589.7	8.89006	1194.3	320.18	61152.1	54.3919	39.2345	15.1574	14.4292	5.41712	9.01207	743.36
Lower quartile	Western Sahara	ESH	LMC	Africa	Northern Africa	NA	Middle East and North Africa	554837	0.0905517	110652	92520.8	92382.4	0	0	0	0	0	10718.1	92382.4	126342	633.389	125714	10718.1	107757	626.969	107062	92382.4	10731	92382.4	0	0	0	10494	10494	0	73580.5	14051.6	73540.4	59.3173	5638.32	3997.79	111867	110.776	80.301	30.1106	60.6726	24.5316	34.5307	3016.05
Median	Western Sahara	ESH	LMC	Africa	Northern Africa	NA	Middle East and North Africa	554837	0.0905517	128227	108805	108676	0	125.545	0	125.545	0	16776.5	108676	144649	748.024	143936	16776.5	124372	809.717	123577	108676	14272.1	108676	0	125.545	0	14048.2	14048.2	0	87574.8	19670.2	87469.7	84.1821	9046.81	6584.12	129584	131.045	95.2633	35.5675	83.18	34.0716	48.0982	4094.01
Upper quartile	Western Sahara	ESH	LMC	Africa	Northern Africa	NA	Middle East and North Africa	554837	0.0905517	151164	129610	129444	0	361.527	0	361.527	0	26061.1	129444	168406	897.49	167555	26061.1	145220	1041.48	144292	129444	18532.3	129444	0	361.527	0	18269.4	18269.4	0	104882	26897.2	104743	116.61	14520.6	11012.7	152751	158.18	115.137	43.1118	114.93	48.624	66.8744	5682.2
Max	Western Sahara	ESH	LMC	Africa	Northern Africa	NA	Middle East and North Africa	554837	0.0905517	247893	223001	222861	0	2385.24	0	2385.24	0	93359.1	222861	262305	1964.12	260848	93359.1	240255	2825.27	238472	222861	42434	222861	0	2385.24	0	42434	42434	0	198407	87347.4	198252	414.658	67282.2	48720	250183	353.039	255.711	97.3272	412.045	206.598	307.43	15672.8
Mean	Spain	ESP	HIC	Europe	Southern Europe	NA	OECD EU countries	4.72875e+07	0.213981	2.94547e+07	2.94481e+07	2.30385e+07	5.18505e+06	696236	528340	6.40963e+06	2.30385e+07	6593.89	0	2.95142e+07	17860.7	2.94964e+07	6593.89	2.94898e+07	20435.4	2.94694e+07	2.30385e+07	6.43083e+06	0	2.30385e+07	696236	528340	5.20626e+06	21204.2	5.18505e+06	0	0	0	0	4361.6	2232.29	44890.1	3126	2275.32	850.678	2470.67	1524.55	946.116	487.74
Min	Spain	ESP	HIC	Europe	Southern Europe	NA	OECD EU countries	4.72875e+07	0.213981	2.62168e+07	2.62115e+07	2.02233e+07	3.98709e+06	695791	463861	5.20988e+06	2.02233e+07	540.359	0	2.62762e+07	15059.6	2.62598e+07	540.359	2.62545e+07	16452.6	2.62368e+07	2.02233e+07	5.2276e+06	0	2.02233e+07	695791	463861	4.00681e+06	15948.3	3.98709e+06	0	0	0	0	399.776	139.261	34849.2	2630.24	1919.5	710.734	1902.42	1157.26	731.776	322.208
Lower quartile	Spain	ESP	HIC	Europe	Southern Europe	NA	OECD EU countries	4.72875e+07	0.213981	2.87785e+07	2.87725e+07	2.24196e+07	4.86267e+06	695791	488280	6.08126e+06	2.24196e+07	3746.48	0	2.88379e+07	17216.4	2.88198e+07	3746.48	2.88135e+07	19446.2	2.87938e+07	2.24196e+07	6.10302e+06	0	2.24196e+07	695791	488280	4.88464e+06	20052.2	4.86267e+06	0	0	0	0	2439.28	1215.3	41551.3	3010.67	2191.83	819.224	2337.85	1440.05	893.104	448.06
Median	Spain	ESP	HIC	Europe	Southern Europe	NA	OECD EU countries	4.72875e+07	0.213981	2.94366e+07	2.94325e+07	2.30129e+07	5.16079e+06	695791	520165	6.38327e+06	2.30129e+07	5200.49	0	2.94969e+07	17807.5	2.94792e+07	5200.49	2.94738e+07	20316.9	2.94537e+07	2.30129e+07	6.40391e+06	0	2.30129e+07	695791	520165	5.18263e+06	21184	5.16079e+06	0	0	0	0	3401.92	1711.44	43834.8	3115.54	2267.45	848.136	2460.23	1515.59	940.702	482.423
Upper quartile	Spain	ESP	HIC	Europe	Southern Europe	NA	OECD EU countries	4.72875e+07	0.213981	3.01498e+07	3.01426e+07	2.3659e+07	5.47782e+06	696109	558659	6.70845e+06	2.3659e+07	7574.25	0	3.02096e+07	18467.5	3.01911e+07	7574.25	3.01846e+07	21318.9	3.01635e+07	2.3659e+07	6.72974e+06	0	2.3659e+07	696109	558659	5.49968e+06	22408.1	5.47782e+06	0	0	0	0	4991.11	2500.86	46845.6	3233.37	2353.76	879.888	2586.57	1597.75	993.227	522.761
Max	Spain	ESP	HIC	Europe	Southern Europe	NA	OECD EU countries	4.72875e+07	0.213981	3.31062e+07	3.30884e+07	2.64329e+07	7.19242e+06	706772	811021	8.49319e+06	2.64329e+07	32392.5	0	3.31634e+07	21498.4	3.31458e+07	32392.5	3.31284e+07	28096	3.31078e+07	2.64329e+07	8.51571e+06	0	2.64329e+07	706772	811021	7.21493e+06	26248.3	7.19242e+06	0	0	0	0	27295.4	16121.3	74424.8	3804.79	2779.36	1025.44	3289	2083.89	1275.87	711.824
Mean	Estonia	EST	HIC	Europe	Northern Europe	NA	OECD EU countries	1.32628e+06	0.350534	710901	710438	512779	127325	0	70334.6	197659	512779	463.403	0	712524	574.505	711950	463.403	711486	554.366	710932	512779	198153	0	512779	0	70334.6	127819	494.245	127325	0	0	0	0	306.382	157.021	1592.27	100.538	73.1759	27.3624	67.3649	41.5303	25.8347	11.3018
Min	Estonia	EST	HIC	Europe	Northern Europe	NA	OECD EU countries	1.32628e+06	0.350534	652195	651725	319264	56396.8	0	317.824	69547.3	319264	103.882	0	653657	466.021	653124	103.882	652654	409.423	652133	319264	70194.1	0	319264	0	317.824	56789.4	248.322	56396.8	0	0	0	0	59.5737	30.1095	1119.67	81.8465	59.6251	22.1576	47.895	29.1479	18.1983	3.83513
Lower quartile	Estonia	EST	HIC	Europe	Northern Europe	NA	OECD EU countries	1.32628e+06	0.350534	698136	697657	457052	100737	0	18314.5	135366	457052	369.735	0	699677	547.486	699116	369.735	698670	514.541	698152	457052	135889	0	457052	0	18314.5	101190	401.034	100737	0	0	0	0	241.905	118.453	1477.1	95.7577	69.6821	26.0589	61.7494	38.0147	23.4978	8.50815
Median	Estonia	EST	HIC	Europe	Northern Europe	NA	OECD EU countries	1.32628e+06	0.350534	710525	710029	528080	120785	0	30967.5	182401	528080	449.77	0	712195	571.221	711577	449.77	711147	548.483	710557	528080	182911	0	528080	0	30967.5	121305	496.053	120785	0	0	0	0	297.058	150.678	1581.52	100.03	72.775	27.2126	66.5615	40.9615	25.3905	10.7312
Upper quartile	Estonia	EST	HIC	Europe	Northern Europe	NA	OECD EU countries	1.32628e+06	0.350534	723415	722954	573884	153875	0	131783	251495	573884	546.357	0	724989	599.563	724411	546.357	723964	586.52	723416	573884	251906	0	573884	0	131783	154355	587.896	153875	0	0	0	0	363.877	187.157	1695.26	104.915	76.3694	28.5664	71.8461	44.3507	27.6665	13.6023
Max	Estonia	EST	HIC	Europe	Northern Europe	NA	OECD EU countries	1.32628e+06	0.350534	788419	787939	661233	223562	0	254771	378919	661233	1171.51	0	790172	721.553	789592	1171.51	789111	840.234	788518	661233	379514	0	661233	0	254771	224016	768.207	223562	0	0	0	0	794.973	427.327	2293.23	128.096	92.5335	35.5629	109.072	68.1471	46.3822	25.5595
Mean	Ethiopia	ETH	LIC	Africa	Sub-Saharan Africa	Eastern Africa	Other Africa	1.1703e+08	0.361355	1.24612e+07	4.73467e+06	4.55258e+06	0	0	182097	182097	0	7.72649e+06	4.55258e+06	1.40737e+07	253390	1.38203e+07	7.72649e+06	6.09381e+06	86230.5	6.00758e+06	4.55258e+06	1.455e+06	4.55258e+06	0	0	182097	1.27291e+06	1.27291e+06	0	3.68492e+06	867657	3.68114e+06	3778.24	5.49788e+06	2.22861e+06	1.26187e+07	44341.7	32273.3	12068.5	5837.24	2527.7	3309.54	386521
Min	Ethiopia	ETH	LIC	Africa	Sub-Saharan Africa	Eastern Africa	Other Africa	1.1703e+08	0.361355	1.15353e+07	4.32599e+06	4.14389e+06	0	0	182097	182097	0	7.08569e+06	4.14389e+06	1.30905e+07	232799	1.2853e+07	7.08569e+06	5.61313e+06	71526.8	5.53748e+06	4.14389e+06	1.27713e+06	4.14389e+06	0	0	182097	1.09503e+06	1.09503e+06	0	3.12012e+06	642667	3.11654e+06	2725.01	5.00495e+06	1.9591e+06	1.16786e+07	40371	29328.3	11042.6	4449.84	1876.65	2573.19	326348
Lower quartile	Ethiopia	ETH	LIC	Africa	Sub-Saharan Africa	Eastern Africa	Other Africa	1.1703e+08	0.361355	1.23051e+07	4.64755e+06	4.46545e+06	0	0	182097	182097	0	7.60869e+06	4.46545e+06	1.39118e+07	249918	1.36614e+07	7.60869e+06	5.99628e+06	81841.4	5.91215e+06	4.46545e+06	1.41098e+06	4.46545e+06	0	0	182097	1.22889e+06	1.22889e+06	0	3.59065e+06	793915	3.58706e+06	3438.18	5.40948e+06	2.17689e+06	1.24597e+07	43725.4	31828.1	11894.7	5468.21	2350.08	3114.73	370391
Median	Ethiopia	ETH	LIC	Africa	Sub-Saharan Africa	Eastern Africa	Other Africa	1.1703e+08	0.361355	1.24619e+07	4.73141e+06	4.54931e+06	0	0	182097	182097	0	7.72518e+06	4.54931e+06	1.40735e+07	253399	1.382e+07	7.72518e+06	6.09034e+06	85794.8	6.00429e+06	4.54931e+06	1.44948e+06	4.54931e+06	0	0	182097	1.26739e+06	1.26739e+06	0	3.68988e+06	854830	3.68611e+06	3708.58	5.49836e+06	2.22698e+06	1.26201e+07	44332	32261.4	12067.3	5804.8	2510.98	3296.85	383180
Upper quartile	Ethiopia	ETH	LIC	Africa	Sub-Saharan Africa	Eastern Africa	Other Africa	1.1703e+08	0.361355	1.26134e+07	4.81799e+06	4.63589e+06	0	0	182097	182097	0	7.84545e+06	4.63589e+06	1.42391e+07	256843	1.39824e+07	7.84545e+06	6.1894e+06	90117.1	6.10167e+06	4.63589e+06	1.49496e+06	4.63589e+06	0	0	182097	1.31286e+06	1.31286e+06	0	3.77991e+06	928841	3.77603e+06	4054.62	5.58526e+06	2.27955e+06	1.27744e+07	44979.7	32740.8	12242.3	6174.67	2692.12	3482.59	399930
Max	Ethiopia	ETH	LIC	Africa	Sub-Saharan Africa	Eastern Africa	Other Africa	1.1703e+08	0.361355	1.33646e+07	5.25753e+06	5.07543e+06	0	0	182097	182097	0	8.39488e+06	5.07543e+06	1.51108e+07	274824	1.4836e+07	8.39488e+06	6.6005e+06	107725	6.51742e+06	5.07543e+06	1.67119e+06	5.07543e+06	0	0	182097	1.4891e+06	1.4891e+06	0	4.13412e+06	1.28527e+06	4.12992e+06	5878.59	5.98184e+06	2.51023e+06	1.35491e+07	48014.8	34982	13064.7	7715.9	3360.86	4355.03	517242
Mean	Finland	FIN	HIC	Europe	Northern Europe	NA	OECD EU countries	5.43867e+06	0.39247	2.68791e+06	2.68791e+06	1.5472e+06	443630	20754.9	676321	1.14071e+06	1.5472e+06	0	0	2.69416e+06	2597.14	2.69156e+06	0	2.69156e+06	1767.08	2.68979e+06	1.5472e+06	1.14259e+06	0	1.5472e+06	20754.9	676321	445513	1882.49	443630	0	0	0	0	0	0	4364.22	454.511	330.802	123.709	212.252	130.937	81.3148	43.2974
Min	Finland	FIN	HIC	Europe	Northern Europe	NA	OECD EU countries	5.43867e+06	0.39247	2.3038e+06	2.3038e+06	1.13156e+06	267963	69.4761	314041	746259	1.13156e+06	0	0	2.30962e+06	2193.94	2.30726e+06	0	2.30726e+06	1352.02	2.30565e+06	1.13156e+06	748210	0	1.13156e+06	69.4761	314041	269973	1319.76	267963	0	0	0	0	0	0	3558.75	387.434	281.533	105.654	166.121	101.978	60.8024	25.6411
Lower quartile	Finland	FIN	HIC	Europe	Northern Europe	NA	OECD EU countries	5.43867e+06	0.39247	2.5972e+06	2.5972e+06	1.44283e+06	402207	7688.06	583608	1.038e+06	1.44283e+06	0	0	2.60326e+06	2517.22	2.60072e+06	0	2.60072e+06	1697.01	2.59903e+06	1.44283e+06	1.03974e+06	0	1.44283e+06	7688.06	583608	404196	1748.78	402207	0	0	0	0	0	0	4225.02	440.554	320.63	119.895	201.813	124.315	77.0792	38.9128
Median	Finland	FIN	HIC	Europe	Northern Europe	NA	OECD EU countries	5.43867e+06	0.39247	2.68003e+06	2.68003e+06	1.53975e+06	440288	17660.8	667490	1.13313e+06	1.53975e+06	0	0	2.68642e+06	2594.16	2.68379e+06	0	2.68379e+06	1762.55	2.68208e+06	1.53975e+06	1.13494e+06	0	1.53975e+06	17660.8	667490	442197	1880.7	440288	0	0	0	0	0	0	4355.93	453.876	330.325	123.516	211.316	130.367	80.8885	42.8404
Upper quartile	Finland	FIN	HIC	Europe	Northern Europe	NA	OECD EU countries	5.43867e+06	0.39247	2.76914e+06	2.76914e+06	1.64374e+06	481188	29973.8	762986	1.23649e+06	1.64374e+06	0	0	2.77547e+06	2671.43	2.77279e+06	0	2.77279e+06	1832.24	2.77102e+06	1.64374e+06	1.23851e+06	0	1.64374e+06	29973.8	762986	482999	2016.21	481188	0	0	0	0	0	0	4495.19	467.544	340.23	127.286	222.126	136.989	85.3002	47.0956
Max	Finland	FIN	HIC	Europe	Northern Europe	NA	OECD EU countries	5.43867e+06	0.39247	3.19534e+06	3.19534e+06	2.18346e+06	675233	119063	1.13047e+06	1.7045e+06	2.18346e+06	0	0	3.2023e+06	3159.67	3.19938e+06	0	3.19938e+06	2238.61	3.19728e+06	2.18346e+06	1.70639e+06	0	2.18346e+06	119063	1.13047e+06	677144	2423.01	675233	0	0	0	0	0	0	5270.34	555.783	404.382	151.401	298.684	189.199	111.715	67.7577
Mean	Fiji	FJI	UMC	Oceania	Melanesia	NA	Other non-OECD Asia	913971	0.45475	265208	208312	208312	0	0	0	0	205509	56896.3	2802.63	285811	1634.88	284176	56896.3	227280	1097.33	226182	208312	17870.6	2802.63	205509	0	0	17870.6	17870.6	0	2264.81	537.813	2262.51	2.30632	13677.2	43219.1	62431.1	286.016	208.161	77.8542	102.679	45.6107	57.0684	5424.89
Min	Fiji	FJI	UMC	Oceania	Melanesia	NA	Other non-OECD Asia	913971	0.45475	180948	148049	148049	0	0	0	0	146384	30516.1	538.938	195397	933.054	194404	30516.1	161958	418.816	161354	148049	2919.11	538.938	146384	0	0	2919.11	2919.11	0	435.657	100.818	435.286	0.370897	6311.43	22930.2	33842.5	164.407	120.372	44.0347	34.3452	14.735	19.2445	851.612
Lower quartile	Fiji	FJI	UMC	Oceania	Melanesia	NA	Other non-OECD Asia	913971	0.45475	242919	191573	191573	0	0	0	0	189075	50160.1	2148.52	262752	1450.83	261272	50160.1	209722	910.141	208750	191573	12559.9	2148.52	189075	0	0	12559.9	12559.9	0	1715.06	363.024	1713.17	1.54868	11463.6	37872.1	55142.6	252.621	183.858	68.8044	81.1466	36.0049	44.9479	3535.43
Median	Fiji	FJI	UMC	Oceania	Melanesia	NA	Other non-OECD Asia	913971	0.45475	262348	206111	206111	0	0	0	0	203300	56243.7	2688.61	283256	1614.19	281650	56243.7	225184	1068.26	224082	206111	16843.3	2688.61	203300	0	0	16843.3	16843.3	0	2170.64	491.538	2168.56	2.08564	13314.1	42636.3	61790.9	282.514	205.445	76.8922	98.3957	43.6067	54.5046	4932.53
Upper quartile	Fiji	FJI	UMC	Oceania	Melanesia	NA	Other non-OECD Asia	913971	0.45475	284944	222404	222404	0	0	0	0	219380	63099.8	3356.12	306425	1800.24	304535	63099.8	242421	1256.02	241243	222404	22159.5	3356.12	219380	0	0	22159.5	22159.5	0	2715.27	653.253	2713.19	2.80987	15503.4	48041.1	69182.9	315.51	229.731	85.8916	119.782	52.9541	66.532	6791.94
Max	Fiji	FJI	UMC	Oceania	Melanesia	NA	Other non-OECD Asia	913971	0.45475	387231	301397	301397	0	0	0	0	296961	95747.6	7612.56	407017	2798.19	404368	95747.6	327490	2584.24	325275	301397	50524.4	7612.56	296961	0	0	50524.4	50524.4	0	5587.52	2385.96	5574.26	13.2542	27194.4	75133.4	104940	468.557	341.889	126.798	310.144	138.966	171.178	19531.4
Mean	Falkland Islands	FLK	HIC	Americas	Latin America and the Caribbean	South America	Latin America	3706.18	1	2307.73	2294.98	1949.25	345.733	0	0	345.733	1949.25	12.7445	0	2314.92	3.53151	2311.39	12.7445	2298.64	3.66123	2294.98	1949.25	345.733	0	1949.25	0	0	345.733	0	345.733	0	0	0	0	8.39392	4.35062	19.9373	0.618237	0.449989	0.168248	0.442089	0.272746	0.169344	0
Min	Falkland Islands	FLK	HIC	Americas	Latin America and the Caribbean	South America	Latin America	3706.18	1	162.331	162.331	108.94	0	0	0	0	108.94	0	0	163.414	0.184236	162.851	0	162.851	0.139225	162.331	108.94	0	0	108.94	0	0	0	0	0	0	0	0	0	0	0	0.515771	0.0310274	0.0220274	0.00900001	0.00325987	0.00193659	0.00132328	0
Lower quartile	Falkland Islands	FLK	HIC	Americas	Latin America and the Caribbean	South America	Latin America	3706.18	1	1420.39	1418.5	1178.67	0	0	0	0	1178.67	0	0	1426.9	1.87666	1424.14	0	1420.92	1.62764	1418.5	1178.67	0	0	1178.67	0	0	0	0	0	0	0	0	0	0	0	4.49874	0.325172	0.235749	0.0887398	0.1691	0.101438	0.0610233	0
Median	Falkland Islands	FLK	HIC	Americas	Latin America and the Caribbean	South America	Latin America	3706.18	1	2069.71	2056.19	1759.79	222.907	0	0	222.907	1759.79	0	0	2079.78	2.93103	2074.76	0	2061.11	2.80994	2056.19	1759.79	222.907	0	1759.79	0	0	222.907	0	222.907	0	0	0	0	0	0	8.44605	0.509083	0.369533	0.13859	0.312793	0.192051	0.114333	0
Upper quartile	Falkland Islands	FLK	HIC	Americas	Latin America and the Caribbean	South America	Latin America	3706.18	1	3246.61	3233.08	2637.67	542.828	0	0	542.828	2637.67	19.4979	0	3252.14	4.62352	3248.77	19.4979	3235.62	4.77968	3233.08	2637.67	542.828	0	2637.67	0	0	542.828	0	542.828	0	0	0	0	10.6656	2.70642	24.644	0.806897	0.58832	0.220255	0.559704	0.346488	0.211934	0
Max	Falkland Islands	FLK	HIC	Americas	Latin America and the Caribbean	South America	Latin America	3706.18	1	5059.3	5059.3	5005.19	2003.37	0	0	2003.37	5005.19	190.062	0	5077.01	16.6724	5068	190.062	5068	23.0726	5059.3	5005.19	2003.37	0	5005.19	0	0	2003.37	0	2003.37	0	0	0	0	141.461	88.32	209.693	3.04106	2.19906	0.841992	4.65013	2.7498	1.90033	0
Mean	France	FRA	HIC	Europe	Western Europe	NA	OECD EU countries	6.44651e+07	0.381508	3.52729e+07	3.52729e+07	1.64899e+07	6.80647e+06	1.70974e+06	1.02667e+07	1.8783e+07	1.64899e+07	0	0	3.53545e+07	30098.3	3.53244e+07	0	3.53244e+07	28756.9	3.52956e+07	1.64899e+07	1.88057e+07	0	1.64899e+07	1.70974e+06	1.02667e+07	6.82921e+06	22737.5	6.80647e+06	0	0	0	0	0	0	58855.2	5267.57	3833.98	1433.59	3486.14	2150.96	1335.18	522.455
Min	France	FRA	HIC	Europe	Western Europe	NA	OECD EU countries	6.44651e+07	0.381508	3.23621e+07	3.23621e+07	1.33713e+07	5.57087e+06	1.02028e+06	7.01693e+06	1.57195e+07	1.33713e+07	0	0	3.24395e+07	26695.4	3.24114e+07	0	3.24114e+07	24282.3	3.23848e+07	1.33713e+07	1.57413e+07	0	1.33713e+07	1.02028e+06	7.01693e+06	5.59389e+06	19058.7	5.57087e+06	0	0	0	0	0	0	51371.5	4658.04	3393.21	1264.83	2908.52	1769.79	1111.53	407.064
Lower quartile	France	FRA	HIC	Europe	Western Europe	NA	OECD EU countries	6.44651e+07	0.381508	3.47077e+07	3.47077e+07	1.58207e+07	6.55023e+06	1.56303e+06	9.65904e+06	1.81195e+07	1.58207e+07	0	0	3.47884e+07	29452.9	3.47585e+07	0	3.47585e+07	27924.6	3.47301e+07	1.58207e+07	1.81423e+07	0	1.58207e+07	1.56303e+06	9.65904e+06	6.57361e+06	22012.5	6.55023e+06	0	0	0	0	0	0	57441.2	5151.86	3749.31	1401.61	3356.14	2066.14	1280.89	498.28
Median	France	FRA	HIC	Europe	Western Europe	NA	OECD EU countries	6.44651e+07	0.381508	3.52669e+07	3.52669e+07	1.64894e+07	6.80009e+06	1.70522e+06	1.02528e+07	1.87657e+07	1.64894e+07	0	0	3.53479e+07	30081.4	3.53181e+07	0	3.53181e+07	28721	3.52896e+07	1.64894e+07	1.87885e+07	0	1.64894e+07	1.70522e+06	1.02528e+07	6.82297e+06	22728	6.80009e+06	0	0	0	0	0	0	58775.5	5266.67	3833.32	1433.39	3479.2	2146.32	1331.6	521.369
Upper quartile	France	FRA	HIC	Europe	Western Europe	NA	OECD EU countries	6.44651e+07	0.381508	3.58124e+07	3.58124e+07	1.7159e+07	7.05501e+06	1.85024e+06	1.08635e+07	1.94471e+07	1.7159e+07	0	0	3.5895e+07	30736.6	3.58645e+07	0	3.58645e+07	29581.6	3.5835e+07	1.7159e+07	1.94692e+07	0	1.7159e+07	1.85024e+06	1.08635e+07	7.07768e+06	23442.5	7.05501e+06	0	0	0	0	0	0	60240.8	5378.5	3914.89	1463.74	3611.56	2228.97	1386.89	544.871
Max	France	FRA	HIC	Europe	Western Europe	NA	OECD EU countries	6.44651e+07	0.381508	3.8596e+07	3.8596e+07	2.02478e+07	8.21062e+06	2.51272e+06	1.34065e+07	2.27323e+07	2.02478e+07	0	0	3.86822e+07	34518.1	3.865e+07	0	3.865e+07	33695.7	3.86198e+07	2.02478e+07	2.27543e+07	0	2.02478e+07	2.51272e+06	1.34065e+07	8.23375e+06	26320.9	8.21062e+06	0	0	0	0	0	0	68213.3	6032.54	4392.39	1640.15	4261.42	2644.1	1648.23	674.005
Mean	Faroe Islands	FRO	HIC	Europe	Northern Europe	NA	Other Eurasia	49471.3	0.653371	28358.1	28327.8	22852.7	5475.13	0	0	5475.13	22852.7	30.3042	0	28439.7	33.2695	28406.4	30.3042	28376.1	38.5904	28337.5	22852.7	5484.8	0	22852.7	0	0	5484.8	9.66798	5475.13	0	0	0	0	19.9412	10.363	102.164	5.82343	4.23855	1.58488	4.53648	2.79692	1.73955	0.222528
Min	Faroe Islands	FRO	HIC	Europe	Northern Europe	NA	Other Eurasia	49471.3	0.653371	16806.5	16774.2	12751.3	1597.9	0	0	1597.9	12751.3	0	0	16863.5	19.0599	16841.6	0	16809.3	18.502	16781.5	12751.3	1604.2	0	12751.3	0	0	1604.2	2.80262	1597.9	0	0	0	0	0	0	44.1477	3.34779	2.45671	0.891081	1.7167	1.10345	0.613251	0.00215253
Lower quartile	Faroe Islands	FRO	HIC	Europe	Northern Europe	NA	Other Eurasia	49471.3	0.653371	25633.4	25605.6	20424.7	4235.46	0	0	4235.46	20424.7	12.4008	0	25709	29.4217	25676.3	12.4008	25652.8	32.8126	25617	20424.7	4245.45	0	20424.7	0	0	4245.45	6.27581	4235.46	0	0	0	0	7.77218	3.48148	82.124	5.13809	3.73947	1.3987	3.68308	2.2485	1.39667	0.1225
Median	Faroe Islands	FRO	HIC	Europe	Northern Europe	NA	Other Eurasia	49471.3	0.653371	27964.9	27942.4	22508.7	5221.56	0	0	5221.56	22508.7	24.9335	0	28052.9	32.8371	28016.1	24.9335	27991.6	37.5522	27952.5	22508.7	5231.03	0	22508.7	0	0	5231.03	9.70042	5221.56	0	0	0	0	16.1067	7.79225	97.77	5.74588	4.18455	1.56258	4.34377	2.67934	1.65373	0.201856
Upper quartile	Faroe Islands	FRO	HIC	Europe	Northern Europe	NA	Other Eurasia	49471.3	0.653371	30751.4	30704.3	24942.1	6438.73	0	0	6438.73	24942.1	43.2836	0	30840.2	36.5451	30804.4	43.2836	30753.9	43.3444	30714.8	24942.1	6447.69	0	24942.1	0	0	6447.69	13.0166	6438.73	0	0	0	0	28.2036	14.4199	117.305	6.3794	4.64605	1.73766	5.19011	3.20363	1.99982	0.300093
Max	Faroe Islands	FRO	HIC	Europe	Northern Europe	NA	Other Eurasia	49471.3	0.653371	41436.4	41417.4	35882.1	13341.1	0	0	13341.1	35882.1	162.734	0	41567	58.4665	41517.7	162.734	41498.6	88.3694	41421.3	35882.1	13355.2	0	35882.1	0	0	13355.2	17.6984	13341.1	0	0	0	0	127.393	62.537	245.453	10.4074	7.53805	2.89065	15.8185	10.3594	5.6311	0.707223
Mean	Micronesia	FSM	LMC	Oceania	Micronesia	NA	Other non-OECD Asia	107775	0.716285	16689.8	9043.66	9043.66	0	0	0	0	0	7646.15	9043.66	17924.8	224.802	17700	7646.15	10053.8	128.738	9925.08	9043.66	881.42	9043.66	0	0	0	881.42	881.42	0	7310.73	1732.93	7303.27	7.46255	4148.76	3497.39	17043.3	39.3738	28.6531	10.7208	24.6148	10.3194	14.2954	269.19
Min	Micronesia	FSM	LMC	Oceania	Micronesia	NA	Other non-OECD Asia	107775	0.716285	8790.77	5859.64	5859.64	0	0	0	0	0	2561.55	5859.64	9873.92	97.9012	9769.44	2561.55	6518.95	29.2816	6410.12	5859.64	64.4704	5859.64	0	0	0	64.4704	64.4704	0	2801.43	80.0939	2799.62	0.35148	653.65	439.774	8936.82	15.9275	11.5161	4.41138	4.56304	1.67696	2.67249	19.5672
Lower quartile	Micronesia	FSM	LMC	Oceania	Micronesia	NA	Other non-OECD Asia	107775	0.716285	13566.9	7601.72	7601.72	0	0	0	0	0	5569.34	7601.72	14739.7	173.852	14558.9	5569.34	8577.99	95.1979	8467.85	7601.72	557.975	7601.72	0	0	0	557.975	557.975	0	6070.9	1054.46	6064.52	4.36927	2733.87	2179.1	13859.7	30.3075	22.0756	8.21632	17.3427	6.82438	9.93738	154.418
Median	Micronesia	FSM	LMC	Oceania	Micronesia	NA	Other non-OECD Asia	107775	0.716285	15664.1	8567.18	8567.18	0	0	0	0	0	6969.52	8567.18	16905.3	210.072	16704	6969.52	9600.88	123.585	9471.45	8567.18	807.901	8567.18	0	0	0	807.901	807.901	0	6996.7	1576.94	6989.92	6.69754	3673.01	3023.52	16006	36.7997	26.7672	10.0142	23.721	9.67018	13.5758	236.948
Upper quartile	Micronesia	FSM	LMC	Oceania	Micronesia	NA	Other non-OECD Asia	107775	0.716285	18896.4	9944.61	9944.61	0	0	0	0	0	9084.24	9944.61	20232.6	259.965	19974.9	9084.24	11007.4	156.3	10867	9944.61	1139.5	9944.61	0	0	0	1139.5	1139.5	0	8184.09	2277.6	8176.03	9.68955	5025.03	4334.61	19307.3	45.5721	33.1779	12.3759	30.5995	12.9695	17.939	351.885
Max	Micronesia	FSM	LMC	Oceania	Micronesia	NA	Other non-OECD Asia	107775	0.716285	38106.2	20727.2	20727.2	0	0	0	0	0	25471.9	20727.2	40589.2	665.661	40096.9	25471.9	22694.9	468.694	22505.5	20727.2	2958.28	20727.2	0	0	0	2958.28	2958.28	0	19729.2	7173.11	19703.5	32.7576	21392	15270.3	38787.9	123.148	90.7875	36.4001	96.3101	45.0827	54.0723	1178.23
Mean	Gabon	GAB	UMC	Africa	Sub-Saharan Africa	Middle Africa	Other Africa	2.28077e+06	0.173428	597930	531041	530152	584.138	304.583	0	888.721	527885	66889.3	2267.13	668551	1855.08	666696	66889.3	599807	1878.89	597928	530152	67776.2	2267.13	527885	304.583	0	67471.6	66887.5	584.138	1835.21	431.918	1833.31	1.89332	21534.7	45354.6	72890.4	324.568	236.236	88.3317	214.626	95.2901	119.335	20405.3
Min	Gabon	GAB	UMC	Africa	Sub-Saharan Africa	Middle Africa	Other Africa	2.28077e+06	0.173428	376993	315351	315318	0	0	0	0	313130	38527.5	1128.3	422912	1298.01	421594	38527.5	366631	1011.31	365380	315318	21431.9	1128.3	313130	0	0	21431.9	21370.2	0	869.637	156.806	868.826	0.677596	10750.4	26130.4	43898.5	222.399	161.723	60.676	97.8652	44.1055	53.7597	6099.74
Lower quartile	Gabon	GAB	UMC	Africa	Sub-Saharan Africa	Middle Africa	Other Africa	2.28077e+06	0.173428	522989	458734	458055	28.4701	0	0	43.4569	455792	55815.8	1945.72	591633	1692.23	589918	55815.8	524052	1619.96	522258	458055	50003	1945.72	455792	0	0	49729.8	49145	28.4701	1568.35	346.272	1566.86	1.51634	17050	38233.6	61746.8	295.438	214.974	80.4279	175.547	77.7067	97.4307	14203.1
Median	Gabon	GAB	UMC	Africa	Sub-Saharan Africa	Middle Africa	Other Africa	2.28077e+06	0.173428	581943	514967	514080	260.445	0	0	430.511	511908	63657.5	2231.56	652416	1829.83	650533	63657.5	584082	1821.71	582262	514080	63467.7	2231.56	511908	0	0	63286.4	62561.2	260.445	1805.56	412.874	1804.05	1.81769	20079.5	43352.9	69602.1	320.887	233.278	87.2314	204.987	91.0488	113.815	18455.1
Upper quartile	Gabon	GAB	UMC	Africa	Sub-Saharan Africa	Middle Africa	Other Africa	2.28077e+06	0.173428	658804	589700	588559	895.519	0	0	1285.93	586389	74636.6	2545.3	732819	1985.28	730877	74636.6	662209	2072.08	660288	588559	81527.2	2545.3	586389	0	0	81125	80543.7	895.519	2070.51	499.892	2068.23	2.19501	24325.6	50437	80774	347.719	253.156	94.608	240.841	107.25	134.113	24513.6
Max	Gabon	GAB	UMC	Africa	Sub-Saharan Africa	Middle Africa	Other Africa	2.28077e+06	0.173428	1.00366e+06	927521	927469	5969.47	12219.4	0	12672.4	924506	158601	4139.87	1.12056e+06	2941.05	1.11829e+06	158601	1.01052e+06	4230.46	1.0083e+06	927469	170177	4139.87	924506	12219.4	0	167757	167668	5969.47	3542.13	1262.72	3539.68	5.11455	64997.2	110134	166247	517.302	376.045	141.257	615.849	285.558	330.291	70909.9
Mean	United Kingdom	GBR	HIC	Europe	Northern Europe	NA	OECD Non-EU countries	6.70242e+07	0.139096	3.29941e+07	3.29941e+07	1.78391e+07	7.89129e+06	1.71123e+06	5.55251e+06	1.5155e+07	1.78391e+07	0	0	3.3059e+07	18017.6	3.30409e+07	0	3.30409e+07	13934.7	3.3027e+07	1.78391e+07	1.51879e+07	0	1.78391e+07	1.71123e+06	5.55251e+06	7.9242e+06	32906	7.89129e+06	0	0	0	0	0	0	31952.3	3153.48	2295.31	858.169	1530.17	944.056	586.118	756.619
Min	United Kingdom	GBR	HIC	Europe	Northern Europe	NA	OECD Non-EU countries	6.70242e+07	0.139096	3.11189e+07	3.11189e+07	1.55478e+07	6.93746e+06	1.1722e+06	4.37553e+06	1.33002e+07	1.55478e+07	0	0	3.11853e+07	15407.7	3.11683e+07	0	3.11683e+07	11422.6	3.11553e+07	1.55478e+07	1.33341e+07	0	1.55478e+07	1.1722e+06	4.37553e+06	6.97097e+06	27367.6	6.93746e+06	0	0	0	0	0	0	26830.3	2692.89	1960.71	732.182	1210.45	747.433	463.013	598.89
Lower quartile	United Kingdom	GBR	HIC	Europe	Northern Europe	NA	OECD Non-EU countries	6.70242e+07	0.139096	3.25934e+07	3.25934e+07	1.743e+07	7.69696e+06	1.59863e+06	5.26744e+06	1.47784e+07	1.743e+07	0	0	3.26576e+07	17406.9	3.264e+07	0	3.264e+07	13361.5	3.26261e+07	1.743e+07	1.48099e+07	0	1.743e+07	1.59863e+06	5.26744e+06	7.73101e+06	31013.3	7.69696e+06	0	0	0	0	0	0	30856.2	3045.5	2216.69	829.099	1470.44	905.597	561.485	699.449
Median	United Kingdom	GBR	HIC	Europe	Northern Europe	NA	OECD Non-EU countries	6.70242e+07	0.139096	3.29773e+07	3.29773e+07	1.78371e+07	7.8858e+06	1.707e+06	5.53745e+06	1.51385e+07	1.78371e+07	0	0	3.30418e+07	17932.7	3.30238e+07	0	3.30238e+07	13857.2	3.301e+07	1.78371e+07	1.51719e+07	0	1.78371e+07	1.707e+06	5.53745e+06	7.91902e+06	32894.8	7.8858e+06	0	0	0	0	0	0	31824.7	3138.33	2284.45	854.281	1526.13	941.646	584.578	746.555
Upper quartile	United Kingdom	GBR	HIC	Europe	Northern Europe	NA	OECD Non-EU countries	6.70242e+07	0.139096	3.33829e+07	3.33829e+07	1.82496e+07	8.08399e+06	1.81808e+06	5.82765e+06	1.55219e+07	1.82496e+07	0	0	3.34484e+07	18569.1	3.343e+07	0	3.343e+07	14398.3	3.34153e+07	1.82496e+07	1.55551e+07	0	1.82496e+07	1.81808e+06	5.82765e+06	8.11688e+06	34816.1	8.08399e+06	0	0	0	0	0	0	32920.3	3249.17	2365.39	884.861	1586.75	979.522	608.879	803.508
Max	United Kingdom	GBR	HIC	Europe	Northern Europe	NA	OECD Non-EU countries	6.70242e+07	0.139096	3.50327e+07	3.50327e+07	2.05494e+07	9.05044e+06	2.32027e+06	7.24124e+06	1.75299e+07	2.05494e+07	0	0	3.50976e+07	21102.5	3.50784e+07	0	3.50784e+07	17934.4	3.50639e+07	2.05494e+07	1.7566e+07	0	2.05494e+07	2.32027e+06	7.24124e+06	9.08629e+06	38504.7	9.05044e+06	0	0	0	0	0	0	38563.1	3684.95	2694.82	1006.25	1894.11	1171	727.451	1046.23
Mean	Georgia	GEO	UMC	Asia	Western Asia	NA	Other Eurasia	3.76403e+06	0.357941	1.37271e+06	1.13886e+06	1.13886e+06	0	0	0	0	1.12789e+06	233845	10973.8	1.47068e+06	6946.23	1.46374e+06	233845	1.22989e+06	5089.68	1.2248e+06	1.13886e+06	85940.2	10973.8	1.12789e+06	0	0	85940.2	85940.2	0	8878.62	2095.18	8869.53	9.09364	61288.1	172557	256855	1215.32	884.504	330.813	576.483	256.059	320.424	26160.4
Min	Georgia	GEO	UMC	Asia	Western Asia	NA	Other Eurasia	3.76403e+06	0.357941	1.19838e+06	1.00343e+06	1.00343e+06	0	0	0	0	995066	187637	6641.07	1.26516e+06	5735.26	1.2594e+06	187637	1.06604e+06	3585.15	1.06216e+06	1.00343e+06	40819	6641.07	995066	0	0	40819	40819	0	5089.18	1034.28	5083.71	4.83265	45171.6	137812	207205	1008.89	733.048	275.84	359.41	158.24	201.169	11033.5
Lower quartile	Georgia	GEO	UMC	Asia	Western Asia	NA	Other Eurasia	3.76403e+06	0.357941	1.33574e+06	1.10924e+06	1.10924e+06	0	0	0	0	1.09881e+06	224264	10066.3	1.43041e+06	6682.74	1.42373e+06	224264	1.19681e+06	4766.69	1.19173e+06	1.10924e+06	68300.8	10066.3	1.09881e+06	0	0	68300.8	68300.8	0	8123.32	1831.85	8114.51	7.92914	57952.6	165194	246448	1167.4	849.299	317.858	528.684	234.438	293.802	19900.8
Median	Georgia	GEO	UMC	Asia	Western Asia	NA	Other Eurasia	3.76403e+06	0.357941	1.37208e+06	1.13838e+06	1.13838e+06	0	0	0	0	1.12746e+06	233637	10915.8	1.46875e+06	6938.25	1.46185e+06	233637	1.22838e+06	5070.71	1.22325e+06	1.13838e+06	81547.9	10915.8	1.12746e+06	0	0	81547.9	81547.9	0	8834.61	2069.79	8825.73	8.97428	61027.1	172390	256590	1213.84	883.466	330.231	572.908	254.311	318.545	24259.1
Upper quartile	Georgia	GEO	UMC	Asia	Western Asia	NA	Other Eurasia	3.76403e+06	0.357941	1.40825e+06	1.16692e+06	1.16692e+06	0	0	0	0	1.1555e+06	243085	11827.1	1.50896e+06	7205.67	1.50183e+06	243085	1.26088e+06	5394.73	1.25541e+06	1.16692e+06	99874.9	11827.1	1.1555e+06	0	0	99874.9	99874.9	0	9590.99	2331.9	9580.37	10.1196	64439.4	179786	266906	1261.38	917.796	343.319	619.564	275.755	344.417	30470.3
Max	Georgia	GEO	UMC	Asia	Western Asia	NA	Other Eurasia	3.76403e+06	0.357941	1.5546e+06	1.29285e+06	1.29285e+06	0	0	0	0	1.27897e+06	287909	16756.2	1.68541e+06	8524.59	1.67732e+06	287909	1.41927e+06	6919.54	1.41347e+06	1.29285e+06	199113	16756.2	1.27897e+06	0	0	199113	199113	0	13408.7	3946.91	13394.5	16.668	80771.8	217596	312954	1495.67	1089.78	405.893	892.148	385.494	506.654	79392.4
Mean	Guernsey	GGY	HIC	Europe	Northern Europe	Channel Islands	Other Eurasia	62645.9	0.0912419	29655.6	29655.6	23726.6	5924.25	4.75648	0	5929	23726.6	0	0	29738.2	23.1489	29715.1	0	29715.1	26.9285	29688.2	23726.6	5961.57	0	23726.6	4.75648	0	5956.81	32.5682	5924.25	0	0	0	0	0	0	50.0774	4.05034	2.94721	1.10313	3.26862	2.01642	1.2522	0.753513
Min	Guernsey	GGY	HIC	Europe	Northern Europe	Channel Islands	Other Eurasia	62645.9	0.0912419	10975.6	10975.6	6869.78	0	0	0	0	6869.78	0	0	11017.4	5.42246	11008.2	0	11008.2	1.97873	10997.2	6869.78	9.55805	0	6869.78	0	0	9.55805	9.50555	0	0	0	0	0	0	0	7.40119	0.879461	0.635078	0.244382	0.120723	0.0840591	0.0327392	0.0314506
Lower quartile	Guernsey	GGY	HIC	Europe	Northern Europe	Channel Islands	Other Eurasia	62645.9	0.0912419	22865.7	22865.7	17301.7	2772.65	0	0	2781.1	17301.7	0	0	22905.1	15.4625	22892.8	0	22892.8	14.5087	22879.6	17301.7	2808.5	0	17301.7	0	0	2805.45	21.2062	2772.65	0	0	0	0	0	0	31.6306	2.67977	1.95112	0.731372	1.47961	0.895954	0.535005	0.407856
Median	Guernsey	GGY	HIC	Europe	Northern Europe	Channel Islands	Other Eurasia	62645.9	0.0912419	27667.5	27667.5	22035.5	4940.48	0	0	4944.32	22035.5	0	0	27744.1	21.1208	27721.4	0	27721.4	22.6511	27694	22035.5	4979.88	0	22035.5	0	0	4979.01	32.3185	4940.48	0	0	0	0	0	0	44.5994	3.67464	2.66576	0.997824	2.51736	1.53062	0.923579	0.671883
Upper quartile	Guernsey	GGY	HIC	Europe	Northern Europe	Channel Islands	Other Eurasia	62645.9	0.0912419	33612.6	33612.6	28140.8	8217.35	0	0	8226.79	28140.8	0	0	33726.4	28.41	33697.2	0	33697.2	34.318	33659.7	28140.8	8261.23	0	28140.8	0	0	8248.3	44.0279	8217.35	0	0	0	0	0	0	61.7015	5.00194	3.64363	1.36217	4.15401	2.59179	1.6042	1.02394
Max	Guernsey	GGY	HIC	Europe	Northern Europe	Channel Islands	Other Eurasia	62645.9	0.0912419	54649.1	54649.1	54191.8	25838.4	368.527	0	25838.4	54191.8	0	0	54793.1	81.9168	54751.7	0	54751.7	135.382	54698.6	54191.8	25855.7	0	54191.8	368.527	0	25855.7	59.3146	25838.4	0	0	0	0	0	0	200.416	16.4188	12.1589	4.25984	35.7138	21.8982	13.8156	2.41372
Mean	Ghana	GHA	LMC	Africa	Sub-Saharan Africa	Western Africa	Other Africa	3.21722e+07	0.229586	6.65326e+06	4.34872e+06	4.28738e+06	0	61346.3	0	61346.3	776246	2.30453e+06	3.51113e+06	7.45107e+06	47172.6	7.4039e+06	2.30453e+06	5.09937e+06	26475.4	5.07289e+06	4.28738e+06	785514	3.51113e+06	776246	61346.3	0	724168	724168	0	2.83983e+06	671300	2.83692e+06	2913.18	1.29934e+06	1.00519e+06	5.88931e+06	8255.15	6008.7	2246.45	3145.17	1307.41	1837.75	219862
Min	Ghana	GHA	LMC	Africa	Sub-Saharan Africa	Western Africa	Other Africa	3.21722e+07	0.229586	6.10061e+06	3.90683e+06	3.84634e+06	0	54343.5	0	54343.5	776246	2.04119e+06	3.0701e+06	6.78256e+06	41928.4	6.73716e+06	2.04119e+06	4.54339e+06	20391	4.51853e+06	3.84634e+06	535900	3.0701e+06	776246	54343.5	0	471736	471736	0	2.37535e+06	425226	2.37246e+06	1926.99	982997	721081	5.33412e+06	7363.17	5366.7	1995.29	2129.59	902.008	1227.58	123757
Lower quartile	Ghana	GHA	LMC	Africa	Sub-Saharan Africa	Western Africa	Other Africa	3.21722e+07	0.229586	6.55637e+06	4.27338e+06	4.21168e+06	0	57801.2	0	57801.2	776246	2.24855e+06	3.43544e+06	7.32961e+06	45947.8	7.2835e+06	2.24855e+06	4.99522e+06	24958.1	4.96884e+06	4.21168e+06	713933	3.43544e+06	776246	57801.2	0	652949	652949	0	2.75713e+06	605211	2.75461e+06	2619.4	1.24138e+06	947068	5.79077e+06	8035.48	5847.6	2186.3	2908.18	1200.13	1694.1	194022
Median	Ghana	GHA	LMC	Africa	Sub-Saharan Africa	Western Africa	Other Africa	3.21722e+07	0.229586	6.65323e+06	4.34552e+06	4.28298e+06	0	60300.5	0	60300.5	776246	2.30221e+06	3.50673e+06	7.44846e+06	47119.7	7.4015e+06	2.30221e+06	5.09394e+06	26308	5.06831e+06	4.28298e+06	773654	3.50673e+06	776246	60300.5	0	713161	713161	0	2.84155e+06	660916	2.83881e+06	2868.29	1.29819e+06	1.00406e+06	5.88982e+06	8247.56	6003.21	2244.17	3109.52	1290.2	1814.07	214141
Upper quartile	Ghana	GHA	LMC	Africa	Sub-Saharan Africa	Western Africa	Other Africa	3.21722e+07	0.229586	6.74783e+06	4.42124e+06	4.35871e+06	0	63858.9	0	63858.9	776246	2.35924e+06	3.58247e+06	7.56543e+06	48318.3	7.5182e+06	2.35924e+06	5.19325e+06	27792.6	5.16654e+06	4.35871e+06	848679	3.58247e+06	776246	63858.9	0	787846	787846	0	2.92106e+06	728373	2.91817e+06	3162.17	1.35695e+06	1.06075e+06	5.98499e+06	8463.72	6160.79	2303.18	3350.35	1394.38	1961.96	240372
Max	Ghana	GHA	LMC	Africa	Sub-Saharan Africa	Western Africa	Other Africa	3.21722e+07	0.229586	7.19092e+06	4.87151e+06	4.80095e+06	0	91615.8	0	91615.8	776246	2.61884e+06	4.02471e+06	8.09381e+06	54181.3	8.04344e+06	2.61884e+06	5.72637e+06	35853.5	5.69842e+06	4.80095e+06	1.23189e+06	4.02471e+06	776246	91615.8	0	1.17031e+06	1.17031e+06	0	3.35873e+06	1.0414e+06	3.35578e+06	4860.54	1.59249e+06	1.33988e+06	6.4262e+06	9556.75	6978.58	2587.97	4644.03	2226.33	2732.62	386001
Mean	Gibraltar	GIB	HIC	Europe	Southern Europe	NA	Other Eurasia	31994.8	0	13376.3	13376.3	11301.3	2075.03	0	0	2075.03	11301.3	0	0	13401.6	3.69547	13397.9	0	13397.9	3.30377	13394.6	11301.3	2093.31	0	11301.3	0	0	2093.31	18.2801	2075.03	0	0	0	0	0	0	6.99924	0.645359	0.469866	0.175494	0.416682	0.256764	0.159917	0.423391
Min	Gibraltar	GIB	HIC	Europe	Southern Europe	NA	Other Eurasia	31994.8	0	5605.5	5605.5	3723.29	0	0	0	0	3723.29	0	0	5622.68	0.00742746	5622.26	0	5622.26	0.0069924	5622.15	3723.29	5.67926	0	3723.29	0	0	5.67926	5.45334	0	0	0	0	0	0	0	0.0164908	0.00140853	0.00105852	0.000350011	0.000609038	0.000413833	0.000195204	0.0108163
Lower quartile	Gibraltar	GIB	HIC	Europe	Southern Europe	NA	Other Eurasia	31994.8	0	10860.6	10860.6	8949.64	979.087	0	0	979.087	8949.64	0	0	10882.9	1.55665	10879.1	0	10879.1	1.17568	10876.6	8949.64	995.588	0	8949.64	0	0	995.588	11.888	979.087	0	0	0	0	0	0	2.85087	0.27344	0.198608	0.0741416	0.13473	0.0815074	0.0487013	0.235256
Median	Gibraltar	GIB	HIC	Europe	Southern Europe	NA	Other Eurasia	31994.8	0	12495.6	12495.6	10718.4	1796.37	0	0	1796.37	10718.4	0	0	12522.8	3.03617	12521.1	0	12521.1	2.40452	12518.5	10718.4	1816.68	0	10718.4	0	0	1816.68	18.2048	1796.37	0	0	0	0	0	0	5.54142	0.530188	0.385995	0.143638	0.282946	0.172687	0.105621	0.376149
Upper quartile	Gibraltar	GIB	HIC	Europe	Southern Europe	NA	Other Eurasia	31994.8	0	15531.9	15531.9	13241.8	3029.54	0	0	3029.54	13241.8	0	0	15562.6	5.11804	15558.8	0	15558.8	4.41667	15554.4	13241.8	3053.08	0	13241.8	0	0	3053.08	24.6705	3029.54	0	0	0	0	0	0	9.55932	0.885345	0.641756	0.241249	0.549609	0.337613	0.20737	0.571978
Max	Gibraltar	GIB	HIC	Europe	Southern Europe	NA	Other Eurasia	31994.8	0	23823.4	23823.4	23706.6	10675.1	0	0	10675.1	23706.6	0	0	23848.9	22.914	23841	0	23841	27.2915	23835.9	23706.6	10683.2	0	23706.6	0	0	10683.2	33.1391	10675.1	0	0	0	0	0	0	49.2734	3.91315	2.88976	1.02339	5.35186	3.22279	2.12907	1.2578
Mean	Guinea	GIN	LIC	Africa	Sub-Saharan Africa	Western Africa	Other Africa	1.32042e+07	0.464095	1.55792e+06	647377	647377	0	0	0	0	0	910540	647377	1.72e+06	28832.2	1.69117e+06	910540	780627	12796.5	767831	647377	120454	647377	0	0	0	120454	120454	0	523658	123720	523120	537.993	679938	230602	1.59955e+06	5044.41	3671.83	1372.58	800.548	333.745	466.803	36552.1
Min	Guinea	GIN	LIC	Africa	Sub-Saharan Africa	Western Africa	Other Africa	1.32042e+07	0.464095	1.00343e+06	404698	404698	0	0	0	0	0	577191	404698	1.134e+06	18114.6	1.11589e+06	577191	518828	6494.19	510505	404698	66296.4	404698	0	0	0	66296.4	66296.4	0	301268	40256.2	300923	210.67	423864	122448	1.02932e+06	3107.58	2263.43	844.143	355.72	155.934	199.786	18523.5
Lower quartile	Guinea	GIN	LIC	Africa	Sub-Saharan Africa	Western Africa	Other Africa	1.32042e+07	0.464095	1.44715e+06	582989	582989	0	0	0	0	0	829926	582989	1.60601e+06	26241.6	1.58001e+06	829926	713374	11218.5	701259	582989	105447	582989	0	0	0	105447	105447	0	468047	102262	467579	440.461	619558	203138	1.4856e+06	4589.62	3336.85	1247.94	671.71	277.832	388.224	31034.1
Median	Guinea	GIN	LIC	Africa	Sub-Saharan Africa	Western Africa	Other Africa	1.32042e+07	0.464095	1.54795e+06	640554	640554	0	0	0	0	0	901279	640554	1.70969e+06	28425.8	1.68104e+06	901279	773161	12608.7	760871	640554	118301	640554	0	0	0	118301	118301	0	518551	119846	518004	519.475	672412	226335	1.58921e+06	4978.96	3621.25	1354.94	780.096	322.847	453.287	35606.2
Upper quartile	Guinea	GIN	LIC	Africa	Sub-Saharan Africa	Western Africa	Other Africa	1.32042e+07	0.464095	1.66422e+06	703957	703957	0	0	0	0	0	986643	703957	1.82969e+06	31120.5	1.7992e+06	986643	840620	14141	827099	703957	133349	703957	0	0	0	133349	133349	0	571218	142512	570568	622.766	735110	254464	1.70872e+06	5446.81	3965.32	1481.51	900.859	377.984	527.236	40969
Max	Guinea	GIN	LIC	Africa	Sub-Saharan Africa	Western Africa	Other Africa	1.32042e+07	0.464095	2.12214e+06	1.04151e+06	1.04151e+06	0	0	0	0	0	1.41457e+06	1.04151e+06	2.33312e+06	45905.1	2.29687e+06	1.41457e+06	1.18947e+06	22810.7	1.17295e+06	1.04151e+06	204514	1.04151e+06	0	0	0	204514	204514	0	851610	288840	850582	1193.58	1.04148e+06	392074	2.17933e+06	8001.03	5849.55	2151.49	1806.22	717.312	1216.83	84688.3
Mean	Guadeloupe	GLP	HIC	Americas	Latin America and the Caribbean	Caribbean	OECD EU countries	394752	0.256387	169935	168495	148478	20016.4	0	0	20016.4	148478	1440.71	0	170511	177.884	170333	1440.71	168892	228.723	168663	148478	20185.1	0	148478	0	0	20185.1	168.668	20016.4	0	0	0	0	950.349	490.362	1847.32	31.1179	22.6501	8.46785	28.1721	17.3541	10.818	3.835
Min	Guadeloupe	GLP	HIC	Americas	Latin America and the Caribbean	Caribbean	OECD EU countries	394752	0.256387	67478.3	66774.3	47993.5	0	0	0	0	47993.5	0	0	67868.8	49.9174	67793.6	0	67089.5	35.4279	66989.9	47993.5	57.3876	0	47993.5	0	0	57.3876	55.1497	0	0	0	0	0	0	0	85.6351	9.04349	6.65672	2.38677	3.6701	2.27302	1.39009	0.550972
Lower quartile	Guadeloupe	GLP	HIC	Americas	Latin America and the Caribbean	Caribbean	OECD EU countries	394752	0.256387	142729	141255	121799	6180.97	0	0	6180.97	121799	0	0	143263	139.244	143098	0	141636	154.846	141432	121799	6347.67	0	121799	0	0	6347.67	134.298	6180.97	0	0	0	0	0	0	450.923	24.2159	17.6016	6.5688	17.1452	10.4815	6.42015	2.69615
Median	Guadeloupe	GLP	HIC	Americas	Latin America and the Caribbean	Caribbean	OECD EU countries	394752	0.256387	167014	165351	145737	16261.4	0	0	16261.4	145737	1306.02	0	167516	172.216	167383	1306.02	165723	212.205	165535	145737	16456	0	145737	0	0	16456	168.323	16261.4	0	0	0	0	746.339	259.223	1642.78	29.9361	21.7649	8.1388	25.2339	15.401	9.49276	3.67145
Upper quartile	Guadeloupe	GLP	HIC	Americas	Latin America and the Caribbean	Caribbean	OECD EU countries	394752	0.256387	194444	192557	172375	30382.2	0	0	30382.2	172375	2259.64	0	195077	208.457	194877	2259.64	193043	282.783	192758	172375	30542.4	0	172375	0	0	30542.4	202.785	30382.2	0	0	0	0	1533	800.487	2694.03	36.6181	26.6663	9.97527	35.8187	22.1645	13.8312	4.82559
Max	Guadeloupe	GLP	HIC	Americas	Latin America and the Caribbean	Caribbean	OECD EU countries	394752	0.256387	323017	320935	290604	102326	0	0	102326	290604	10764	0	323862	475.717	323574	10764	321492	996.374	321118	290604	102483	0	290604	0	0	102483	286.249	102326	0	0	0	0	7169.97	6246.24	11132.2	80.0954	58.9363	22.1323	131.171	91.6853	51.8409	10.0729
Mean	Gambia	GMB	LIC	Africa	Sub-Saharan Africa	Western Africa	Other Africa	2.56891e+06	0.247025	452619	186860	186860	0	0	0	0	0	265759	186860	497174	8287	488887	265759	223128	3278.91	219849	186860	32989.8	186860	0	0	0	32989.8	32989.8	0	151227	35632.6	151072	155.339	183022	82737.4	464185	1450.11	1055.31	394.796	297.875	124.23	173.645	10041.9
Min	Gambia	GMB	LIC	Africa	Sub-Saharan Africa	Western Africa	Other Africa	2.56891e+06	0.247025	248593	65349.4	65349.4	0	0	0	0	0	123962	65349.4	297109	4436.5	292044	123962	95904.7	1267.45	94256.2	65349.4	12954.8	65349.4	0	0	0	12954.8	12954.8	0	51352.2	8301.01	51287	35.3883	84395.3	29740.8	255697	790.714	576.893	213.822	87.1788	34.4814	47.1413	3596.48
Lower quartile	Gambia	GMB	LIC	Africa	Sub-Saharan Africa	Western Africa	Other Africa	2.56891e+06	0.247025	402286	150494	150494	0	0	0	0	0	225030	150494	445283	7224.53	437793	225030	185961	2574.78	183160	150494	27486.8	150494	0	0	0	27486.8	27486.8	0	120158	24479.8	120038	106.98	155068	64160.2	412579	1262.58	919.355	343.168	215.24	88.0012	123.441	7946.7
Median	Gambia	GMB	LIC	Africa	Sub-Saharan Africa	Western Africa	Other Africa	2.56891e+06	0.247025	448267	178928	178928	0	0	0	0	0	261027	178928	492623	8094.44	484590	261027	215841	3108.48	212558	178928	32256.4	178928	0	0	0	32256.4	32256.4	0	144668	32157.2	144513	140.009	178736	78725.6	459782	1418.02	1032.48	385.764	272.708	112.346	158.397	9687.94
Upper quartile	Gambia	GMB	LIC	Africa	Sub-Saharan Africa	Western Africa	Other Africa	2.56891e+06	0.247025	499060	215183	215183	0	0	0	0	0	300406	215183	544631	9138.38	535934	300406	252186	3792.02	248271	215183	37831.1	215183	0	0	0	37831.1	37831.1	0	175475	42814.7	175291	188.185	206492	97239.7	511830	1600.48	1165.24	435.713	349.529	145.686	204.649	11728.5
Max	Gambia	GMB	LIC	Africa	Sub-Saharan Africa	Western Africa	Other Africa	2.56891e+06	0.247025	753597	466183	466183	0	0	0	0	0	491790	466183	823559	16753.7	809299	491790	506462	9631.03	498712	466183	64204.9	466183	0	0	0	64204.9	64204.9	0	399644	161581	399179	720.281	387481	220703	772177	2954.32	2168.49	785.828	1295.07	570.981	788.774	24501.1
Mean	Guinea-Bissau	GNB	LIC	Africa	Sub-Saharan Africa	Western Africa	Other Africa	1.97516e+06	0.458712	326575	136520	136520	0	0	0	0	0	190055	136520	354296	6448.54	347848	190055	157793	3028.89	154764	136520	18243.6	136520	0	0	0	18243.6	18243.6	0	110460	26059.9	110347	112.885	137804	52250.4	336052	1128.86	821.562	307.3	300.71	126.425	174.285	5593.65
Min	Guinea-Bissau	GNB	LIC	Africa	Sub-Saharan Africa	Western Africa	Other Africa	1.97516e+06	0.458712	185112	50061.6	50061.6	0	0	0	0	0	94427.2	50061.6	205840	3369.97	202362	94427.2	66442.1	1094.92	65039.5	50061.6	7422.54	50061.6	0	0	0	7422.54	7422.54	0	38474.6	6766.55	38440.4	28.608	71393.2	21049.2	190437	573.227	414.247	157.968	81.5312	35.1594	44.7992	1796.99
Lower quartile	Guinea-Bissau	GNB	LIC	Africa	Sub-Saharan Africa	Western Africa	Other Africa	1.97516e+06	0.458712	289993	100630	100630	0	0	0	0	0	157889	100630	316155	5479.22	310417	157889	121364	2237.83	119061	100630	14469	100630	0	0	0	14469	14469	0	80706.1	16570.2	80634.2	71.303	115474	39215.4	298604	958.446	697.415	260.54	197.602	81.9665	113.534	4183.92
Median	Guinea-Bissau	GNB	LIC	Africa	Sub-Saharan Africa	Western Africa	Other Africa	1.97516e+06	0.458712	325361	130128	130128	0	0	0	0	0	182425	130128	352770	6172.91	346309	182425	151662	2769.61	148634	130128	17489	130128	0	0	0	17489	17489	0	104664	21843.7	104549	95.9737	132386	47844.7	334681	1078.73	784.703	293.746	260.914	108.163	149.803	5172.23
Upper quartile	Guinea-Bissau	GNB	LIC	Africa	Sub-Saharan Africa	Western Africa	Other Africa	1.97516e+06	0.458712	363046	166338	166338	0	0	0	0	0	215966	166338	391730	7119.31	384728	215966	188502	3576.63	185010	166338	21345.9	166338	0	0	0	21345.9	21345.9	0	134322	31623.4	134165	137.018	154731	60303.4	373615	1247.02	906.822	339.4	361.3	150.213	208.182	6591.06
Max	Guinea-Bissau	GNB	LIC	Africa	Sub-Saharan Africa	Western Africa	Other Africa	1.97516e+06	0.458712	537389	306969	306969	0	0	0	0	0	365143	306969	569646	13610.9	558475	365143	341048	9762.44	333390	306969	37315.1	306969	0	0	0	37315.1	37315.1	0	275171	120624	274964	535.941	292352	152280	553628	2433.93	1792.74	654.603	1239.01	656.917	772.496	15433.9
Mean	Equatorial Guinea	GNQ	UMC	Africa	Sub-Saharan Africa	Middle Africa	Other Africa	1.59329e+06	0.10638	557519	350574	349112	1393.41	68.588	0	1461.99	0	206945	349112	611123	1579.41	609543	206945	402599	1121.15	401478	349112	52365.7	349112	0	68.588	0	52297.2	50903.7	1393.41	282966	66145.5	282676	290.561	77180	129765	558757	276.474	201.224	75.2495	127.875	56.7216	71.1532	15401
Min	Equatorial Guinea	GNQ	UMC	Africa	Sub-Saharan Africa	Middle Africa	Other Africa	1.59329e+06	0.10638	214974	45693.9	45666.2	0	0	0	0	0	23074.1	45666.2	233468	783.596	232610	23074.1	63329.9	314.993	63014.9	45666.2	8094.61	45666.2	0	0	0	8094.61	8081.98	0	36406.8	5222.14	36359.8	29.8626	4888.79	17958.5	216119	135.913	99.303	36.61	26.4774	11.4006	14.6982	1327.04
Lower quartile	Equatorial Guinea	GNQ	UMC	Africa	Sub-Saharan Africa	Middle Africa	Other Africa	1.59329e+06	0.10638	444250	243026	242334	25.385	0	0	29.3266	0	117922	242334	498358	1287.98	496904	117922	295349	799.314	294463	242334	35492.4	242334	0	0	0	35450.3	34149.6	25.385	193178	34498.7	192996	150.515	38408	74704.4	445386	224.95	163.742	61.2123	82.908	36.8101	46.0854	9309.9
Median	Equatorial Guinea	GNQ	UMC	Africa	Sub-Saharan Africa	Middle Africa	Other Africa	1.59329e+06	0.10638	542347	331795	329584	81.6214	0	0	95.6363	0	188183	329584	596585	1507.61	594884	188183	384448	1021.88	383530	329584	49413.2	329584	0	0	0	49348.6	47969.5	81.6214	265844	56335.7	265469	242.75	66634.2	116394	543849	263.866	192.052	71.7031	111.454	49.2597	61.8864	13788.5
Upper quartile	Equatorial Guinea	GNQ	UMC	Africa	Sub-Saharan Africa	Middle Africa	Other Africa	1.59329e+06	0.10638	655598	439024	436912	865.779	0	0	1188.96	0	276538	436912	711385	1783.45	709693	276538	490672	1349.02	489416	436912	66355	436912	0	0	0	66335.6	64468.5	865.779	354865	86207.5	354452	373.958	105135	169772	656803	312.874	227.71	85.2907	154.021	68.2524	86.1805	19879.9
Max	Equatorial Guinea	GNQ	UMC	Africa	Sub-Saharan Africa	Middle Africa	Other Africa	1.59329e+06	0.10638	1.07049e+06	950458	950339	27529.8	5015.93	0	27529.8	0	759377	950339	1.1294e+06	4033.4	1.12608e+06	759377	1.00586e+06	4558.45	1.00318e+06	950339	138522	950339	0	5015.93	0	138522	138504	27529.8	835117	302849	833747	1757.96	331303	534210	1.07466e+06	682.556	490.042	192.514	698.505	299.882	434.599	58343.4
Mean	Greece	GRC	HIC	Europe	Southern Europe	NA	OECD EU countries	1.0497e+07	0.328743	5.2183e+06	5.21364e+06	4.60868e+06	604264	696.122	0	604960	4.60868e+06	4668.73	0	5.23199e+06	4096.14	5.22789e+06	4668.73	5.22323e+06	5561.18	5.21766e+06	4.60868e+06	608989	0	4.60868e+06	696.122	0	608293	4029.33	604264	0	0	0	0	3080.43	1588.3	14326	716.922	521.775	195.147	667.526	411.785	255.74	92.7262
Min	Greece	GRC	HIC	Europe	Southern Europe	NA	OECD EU countries	1.0497e+07	0.328743	4.90478e+06	4.90131e+06	4.3205e+06	471182	696.122	0	471878	4.3205e+06	882.174	0	4.91957e+06	3396.34	4.91531e+06	882.174	4.91184e+06	4194.67	4.90502e+06	4.3205e+06	476704	0	4.3205e+06	696.122	0	476008	2265	471182	0	0	0	0	493.92	235.891	9928.07	593.136	431.432	161.704	478.689	293.033	179.536	39.7346
Lower quartile	Greece	GRC	HIC	Europe	Southern Europe	NA	OECD EU countries	1.0497e+07	0.328743	5.15462e+06	5.14955e+06	4.54779e+06	576652	696.122	0	577348	4.54779e+06	3290.97	0	5.16804e+06	3888.96	5.16405e+06	3290.97	5.15894e+06	5174.42	5.15363e+06	4.54779e+06	581261	0	4.54779e+06	696.122	0	580565	3317.91	576652	0	0	0	0	2148.81	1057.91	12851.2	679.898	494.948	184.989	616.788	379.721	234.989	71.1811
Median	Greece	GRC	HIC	Europe	Southern Europe	NA	OECD EU countries	1.0497e+07	0.328743	5.21871e+06	5.21365e+06	4.60884e+06	602894	696.122	0	603591	4.60884e+06	4275.12	0	5.23229e+06	4064.91	5.22817e+06	4275.12	5.22296e+06	5474.29	5.21759e+06	4.60884e+06	607685	0	4.60884e+06	696.122	0	606989	4026.71	602894	0	0	0	0	2832.09	1405.1	14011.8	711.348	517.747	193.702	657.609	404.868	251.041	88.1264
Upper quartile	Greece	GRC	HIC	Europe	Southern Europe	NA	OECD EU countries	1.0497e+07	0.328743	5.28087e+06	5.27618e+06	4.66838e+06	630340	696.122	0	631037	4.66838e+06	5624.16	0	5.29469e+06	4273.28	5.29064e+06	5624.16	5.28602e+06	5869.49	5.28036e+06	4.66838e+06	635078	0	4.66838e+06	696.122	0	634382	4733.64	630340	0	0	0	0	3705.94	1903.07	15433.6	748.527	544.765	203.677	707.562	436.599	272.097	109.926
Max	Greece	GRC	HIC	Europe	Southern Europe	NA	OECD EU countries	1.0497e+07	0.328743	5.54324e+06	5.53943e+06	4.97189e+06	762343	696.122	0	763039	4.97189e+06	14766.6	0	5.56105e+06	5225.4	5.55634e+06	14766.6	5.55253e+06	8283.26	5.54469e+06	4.97189e+06	768026	0	4.97189e+06	696.122	0	767330	5896.68	762343	0	0	0	0	10849.1	7390.01	24996.9	911.282	665.444	249.132	1033.9	685.667	416.171	194.525
Mean	Grenada	GRD	UMC	Americas	Latin America and the Caribbean	Caribbean	Latin America	122907	0.257392	49329.8	44055.5	44012.7	42.8608	0	0	42.8608	43742.5	5274.25	270.163	53185.5	310.387	52875.1	5274.25	47600.9	260.868	47340	44012.7	3327.33	270.163	43742.5	0	0	3327.33	3284.47	42.8608	218.055	52.108	217.83	0.224546	1453.8	3820.45	6115.67	54.3065	39.5285	14.778	33.6904	14.9631	18.7273	996.638
Min	Grenada	GRD	UMC	Americas	Latin America and the Caribbean	Caribbean	Latin America	122907	0.257392	20807.3	18484	18484	0	0	0	0	18344.9	2192.53	47.7441	23772.5	140.494	23616.4	2192.53	20552.3	61.3502	20417.9	18484	824.575	47.7441	18344.9	0	0	824.575	824.575	0	36.0262	5.76059	36.0053	0.0208845	509.705	1501.51	2597.19	24.1383	17.6351	6.50319	7.16451	2.95248	4.21202	162.123
Lower quartile	Grenada	GRD	UMC	Americas	Latin America and the Caribbean	Caribbean	Latin America	122907	0.257392	39546.4	34789	34758.2	0	0	0	0	34516.6	4432.62	191.361	43310.5	264.794	43044	4432.62	38137.9	197.325	37942.8	34758.2	2381.32	191.361	34516.6	0	0	2381.32	2346.98	0	153.287	31.7018	153.158	0.13416	1161.93	3177.52	5158.65	46.2256	33.6227	12.5618	23.6193	10.5174	13.1392	672.498
Median	Grenada	GRD	UMC	Americas	Latin America and the Caribbean	Caribbean	Latin America	122907	0.257392	48296.1	42922.6	42854.2	7.56342	0	0	7.56342	42585.4	5205.49	257.14	52216.1	307.991	51898	5205.49	46466.4	247.343	46208.9	42854.2	3151.29	257.14	42585.4	0	0	3151.29	3104.21	7.56342	208.003	46.8937	207.839	0.1977	1424.44	3755.82	6042.57	53.7631	39.1596	14.6295	31.08	13.7659	17.237	918.819
Upper quartile	Grenada	GRD	UMC	Americas	Latin America and the Caribbean	Caribbean	Latin America	122907	0.257392	57988.5	52346.2	52266.3	49.7906	0	0	49.7906	51979.9	6055.67	334.611	62001.1	353.387	61669.2	6055.67	56026.7	311.257	55739.6	52266.3	4075.02	334.611	51979.9	0	0	4075.02	4036.31	49.7906	271.521	65.2496	271.207	0.286762	1703.13	4415.91	7006.55	61.7688	44.9696	16.8269	40.5229	17.9565	22.5746	1232.53
Max	Grenada	GRD	UMC	Americas	Latin America and the Caribbean	Caribbean	Latin America	122907	0.257392	94190.9	86014.5	86014.5	991.263	0	0	991.263	85588.8	9569.24	739.365	97976.7	540.76	97457.4	9569.24	89281	695.764	88837.2	86014.5	9012.55	739.365	85588.8	0	0	9012.55	8918.16	991.263	615.943	221.033	615.268	1.3141	3433.91	7407.96	10986.8	92.1857	67.9398	25.3366	119.138	54.6131	64.5247	3319.77
Mean	Greenland	GRL	HIC	Americas	Northern America	NA	Latin America	47250.9	0.543445	20494.2	19402.8	18594.2	808.51	0.0964454	0	808.606	18594.2	1091.4	0	20565.4	23.1715	20542.2	1091.4	19450.8	35.7273	19415.1	18594.2	820.923	0	18594.2	0.0964454	0	820.826	12.3169	808.51	0	0	0	0	722.312	369.09	1150.3	4.05303	2.95065	1.10238	4.34958	2.68471	1.66486	0.284174
Min	Greenland	GRL	HIC	Americas	Northern America	NA	Latin America	47250.9	0.543445	6965.04	6447.59	5712.59	0	0	0	0	5712.59	0	0	6992.11	5.0943	6984.6	0	6465.07	5.97211	6459.1	5712.59	4.16686	0	5712.59	0	0	4.16686	3.6537	0	0	0	0	0	0	0	19.8862	0.860016	0.621254	0.238763	0.644401	0.387284	0.206898	0.0247558
Lower quartile	Greenland	GRL	HIC	Americas	Northern America	NA	Latin America	47250.9	0.543445	16512.1	15516.1	14820.1	194.803	0	0	194.803	14820.1	227.471	0	16574.2	17.5618	16553	227.471	15560.4	24.9181	15530	14820.1	205.645	0	14820.1	0	0	205.645	9.00921	194.803	0	0	0	0	143.405	52.646	281.162	3.06534	2.23306	0.833968	2.75734	1.69741	1.04188	0.183702
Median	Greenland	GRL	HIC	Americas	Northern America	NA	Latin America	47250.9	0.543445	19877.5	18804.9	17968.2	561.908	0	0	561.908	17968.2	761.557	0	19949.4	22.0335	19923.1	761.557	18846	32.9287	18817.6	17968.2	574.437	0	17968.2	0	0	574.437	12.2674	561.908	0	0	0	0	486.329	209.286	820.412	3.85407	2.80629	1.04648	3.90181	2.38082	1.47631	0.263326
Upper quartile	Greenland	GRL	HIC	Americas	Northern America	NA	Latin America	47250.9	0.543445	24081.9	22787.4	21888.5	1143.32	0	0	1143.32	21888.5	1606.48	0	24164.4	27.5746	24136.7	1606.48	22846.2	43.506	22799.9	21888.5	1155.61	0	21888.5	0	0	1155.61	15.5443	1143.32	0	0	0	0	1051.74	530.011	1671.17	4.82322	3.51774	1.31416	5.36625	3.33744	2.05742	0.364971
Max	Greenland	GRL	HIC	Americas	Northern America	NA	Latin America	47250.9	0.543445	40018.3	39970.2	38185.7	6128.24	19.1049	0	6129.69	38185.7	6926.45	0	40120.4	63.0085	40091.3	6926.45	40043.1	115.653	39985.9	38185.7	6139	0	38185.7	19.1049	0	6137.55	21.6237	6128.24	0	0	0	0	5789.15	3233.99	7016.7	11.4189	8.34502	3.07393	20.9921	13.2619	8.99316	0.797747
Mean	Guatemala	GTM	LMC	Americas	Latin America and the Caribbean	Central America	Latin America	1.73589e+07	0.270748	3.94024e+06	2.02104e+06	2.02104e+06	0	0	0	0	22553.3	1.9192e+06	1.99849e+06	4.37805e+06	43488	4.33456e+06	1.9192e+06	2.41536e+06	21968.7	2.39339e+06	2.02104e+06	372351	1.99849e+06	22553.3	0	0	372351	372351	0	1.61714e+06	381349	1.61547e+06	1672.38	1.0764e+06	842797	3.98315e+06	7611.21	5539.57	2071.65	2567.6	1073.45	1494.15	112593
Min	Guatemala	GTM	LMC	Americas	Latin America and the Caribbean	Central America	Latin America	1.73589e+07	0.270748	3.63334e+06	1.79116e+06	1.79116e+06	0	0	0	0	10228.9	1.64544e+06	1.76449e+06	3.99359e+06	37992.9	3.95547e+06	1.64544e+06	2.14868e+06	15727.1	2.13029e+06	1.79116e+06	245330	1.76449e+06	10228.9	0	0	245330	245330	0	1.247e+06	224705	1.24584e+06	1025.53	794424	604599	3.67809e+06	6680.43	4872.12	1808.31	1727.04	734.221	987.267	69148.7
Lower quartile	Guatemala	GTM	LMC	Americas	Latin America and the Caribbean	Central America	Latin America	1.73589e+07	0.270748	3.87684e+06	1.97429e+06	1.97429e+06	0	0	0	0	18244.7	1.86702e+06	1.95202e+06	4.30003e+06	42411	4.25732e+06	1.86702e+06	2.34831e+06	20584.2	2.32688e+06	1.97429e+06	323420	1.95202e+06	18244.7	0	0	323420	323420	0	1.55851e+06	324602	1.55686e+06	1410.97	1.02184e+06	789474	3.92031e+06	7415.76	5397.28	2017.06	2335	964.227	1352.08	96122.4
Median	Guatemala	GTM	LMC	Americas	Latin America and the Caribbean	Central America	Latin America	1.73589e+07	0.270748	3.93804e+06	2.01939e+06	2.01939e+06	0	0	0	0	21848.9	1.9181e+06	1.99652e+06	4.37448e+06	43455.6	4.33097e+06	1.9181e+06	2.40976e+06	21770.6	2.38759e+06	2.01939e+06	358305	1.99652e+06	21848.9	0	0	358305	358305	0	1.62304e+06	369615	1.62117e+06	1609.43	1.07611e+06	844022	3.98124e+06	7607.57	5533.48	2069.73	2525.95	1049.88	1467.86	106598
Upper quartile	Guatemala	GTM	LMC	Americas	Latin America and the Caribbean	Central America	Latin America	1.73589e+07	0.270748	4.00375e+06	2.06748e+06	2.06748e+06	0	0	0	0	26477.2	1.96992e+06	2.04407e+06	4.45417e+06	44532	4.41004e+06	1.96992e+06	2.47637e+06	23169.4	2.4539e+06	2.06748e+06	410073	2.04407e+06	26477.2	0	0	410073	410073	0	1.68104e+06	428465	1.67937e+06	1869.26	1.13141e+06	894841	4.0462e+06	7795.64	5673.89	2123.26	2758.59	1157.54	1603.81	123190
Max	Guatemala	GTM	LMC	Americas	Latin America and the Caribbean	Central America	Latin America	1.73589e+07	0.270748	4.311e+06	2.28478e+06	2.28478e+06	0	0	0	0	40211	2.20761e+06	2.25698e+06	4.86353e+06	49517.8	4.81815e+06	2.20761e+06	2.80344e+06	32110.5	2.77803e+06	2.28478e+06	662486	2.25698e+06	40211	0	0	662486	662486	0	1.89063e+06	705148	1.88843e+06	3167.1	1.35175e+06	1.09794e+06	4.35699e+06	8666.81	6319.59	2374.72	4208.57	1867.71	2569.43	240858
Mean	French Guiana	GUF	HIC	Americas	Latin America and the Caribbean	South America	Latin America	290491	0.280156	136529	129049	122963	6086.6	0	0	6086.6	122963	7479.55	0	136912	120.448	136791	7479.55	129312	143.037	129169	122963	6206.3	0	122963	0	0	6206.3	119.702	6086.6	0	0	0	0	4910.44	2569.11	7743.03	21.0919	15.3499	5.74205	17.2582	10.6731	6.58507	2.75973
Min	French Guiana	GUF	HIC	Americas	Latin America and the Caribbean	South America	Latin America	290491	0.280156	30938.4	30350.3	27950	0	0	0	0	27950	0	0	31109.5	30.1421	31079.4	0	30528.8	22.0537	30495.9	27950	37.7651	0	27950	0	0	37.7651	36.5762	0	0	0	0	0	0	0	71.6765	5.27204	3.86771	1.33566	1.83485	1.18066	0.632188	0.233422
Lower quartile	French Guiana	GUF	HIC	Americas	Latin America and the Caribbean	South America	Latin America	290491	0.280156	100463	94561.4	89326.9	150.373	0	0	150.373	89326.9	958.32	0	100756	85.9187	100684	958.32	94818.2	88.2476	94695	89326.9	261.977	0	89326.9	0	0	261.977	91.2911	150.373	0	0	0	0	595.412	201.437	1191.76	14.887	10.8426	4.03468	9.50555	5.79901	3.47481	1.82071
Median	French Guiana	GUF	HIC	Americas	Latin America and the Caribbean	South America	Latin America	290491	0.280156	130169	122678	116915	3071.72	0	0	3071.72	116915	4390.79	0	130512	113.561	130405	4390.79	122950	126.86	122827	116915	3210.17	0	116915	0	0	3210.17	119.397	3071.72	0	0	0	0	2824.77	1133.54	4623.38	19.8097	14.4414	5.40129	14.614	8.88826	5.48657	2.60213
Upper quartile	French Guiana	GUF	HIC	Americas	Latin America and the Caribbean	South America	Latin America	290491	0.280156	167840	159049	151932	9159.04	0	0	9159.04	151932	11164.2	0	168282	147.659	168142	11164.2	159387	181.793	159192	151932	9282.89	0	151932	0	0	9282.89	148.138	9159.04	0	0	0	0	7073.08	3548.53	11422.5	25.8219	18.7694	7.00706	22.2704	13.7074	8.37694	3.51764
Max	French Guiana	GUF	HIC	Americas	Latin America and the Caribbean	South America	Latin America	290491	0.280156	294868	282441	268530	60107	0	0	60107	268530	62772.3	0	295475	378.369	295218	62772.3	282828	517.436	282569	268530	60235.8	0	268530	0	0	60235.8	212.691	60107	0	0	0	0	46108.6	29496.4	63184.3	63.8139	46.3613	17.4527	84.4288	52.5785	42.6887	8.01233
Mean	Guam	GUM	HIC	Oceania	Micronesia	NA	Other non-OECD Asia	169073	0.147111	102536	102478	93534	8944.34	0	0	8944.34	93534	57.387	0	102839	109.191	102730	57.387	102672	112.027	102560	93534	9026.3	0	93534	0	0	9026.3	81.9675	8944.34	0	0	0	0	37.8268	19.5602	278.604	19.104	13.9036	5.20043	15.8604	9.79126	6.06915	1.88283
Min	Guam	GUM	HIC	Oceania	Micronesia	NA	Other non-OECD Asia	169073	0.147111	61538.9	61480.6	56603.6	991.698	0	0	991.698	56603.6	0	0	61741.6	52.8139	61674.1	0	61615.8	49.1925	61547.6	56603.6	1075.83	0	56603.6	0	0	1075.83	43.382	991.698	0	0	0	0	0	0	107.952	9.33339	6.7683	2.56508	5.60823	3.36236	2.24587	0.721121
Lower quartile	Guam	GUM	HIC	Oceania	Micronesia	NA	Other non-OECD Asia	169073	0.147111	93325.2	93286.7	84664.4	5603.84	0	0	5603.84	84664.4	11.7577	0	93617.4	94.2908	93516.9	11.7577	93484.8	93.4672	93379.6	84664.4	5688.14	0	84664.4	0	0	5688.14	72.6521	5603.84	0	0	0	0	7.13068	2.33133	225.777	16.4612	11.9898	4.48538	12.6481	7.79853	4.77856	1.57564
Median	Guam	GUM	HIC	Oceania	Micronesia	NA	Other non-OECD Asia	169073	0.147111	102931	102853	93523.4	8110.9	0	0	8110.9	93523.4	42.4941	0	103219	107.147	103112	42.4941	103061	108.428	102948	93523.4	8197.24	0	93523.4	0	0	8197.24	81.8338	8110.9	0	0	0	0	26.9509	12.076	266.995	18.7462	13.6377	5.10127	15.097	9.32011	5.73162	1.84519
Upper quartile	Guam	GUM	HIC	Oceania	Micronesia	NA	Other non-OECD Asia	169073	0.147111	111862	111766	102322	11516.5	0	0	11516.5	102322	85.5926	0	112194	121.269	112076	85.5926	111947	126.779	111846	102322	11593	0	102322	0	0	11593	91.168	11516.5	0	0	0	0	55.9978	28.3599	320.858	21.3115	15.4864	5.80257	18.1292	11.2472	7.00357	2.13786
Max	Guam	GUM	HIC	Oceania	Micronesia	NA	Other non-OECD Asia	169073	0.147111	145518	145345	134931	30905.7	0	0	30905.7	134931	350.62	0	145856	208.08	145726	350.62	145553	246.729	145429	134931	30992.3	0	134931	0	0	30992.3	118.623	30905.7	0	0	0	0	294.9	144.816	620.691	36.1553	26.1837	9.97163	46.8719	32.7181	18.6692	3.7024
Mean	Guyana	GUY	UMC	Americas	Latin America and the Caribbean	South America	Latin America	795729	0.268337	232836	179049	179049	0	0	0	0	178060	53786.8	989.92	256059	1211.82	254847	53786.8	201060	1212.68	199847	179049	20797.9	989.92	178060	0	0	20797.9	20797.9	0	800.718	189.203	799.895	0.822706	16847.7	36939.1	57201.2	211.957	154.257	57.7001	133.856	59.4023	74.4536	6304.97
Min	Guyana	GUY	UMC	Americas	Latin America and the Caribbean	South America	Latin America	795729	0.268337	121568	72518	72518	0	0	0	0	72368.6	20024.9	149.419	131448	616.804	130748	20024.9	86810	423.209	86362.9	72518	5153.73	149.419	72368.6	0	0	5153.73	5153.73	0	120.308	12.7405	120.183	0.0886321	5243.13	13704	21933.8	107.101	77.8718	29.2289	39.5622	16.8821	22.6801	1363
Lower quartile	Guyana	GUY	UMC	Americas	Latin America and the Caribbean	South America	Latin America	795729	0.268337	196569	146538	146538	0	0	0	0	145586	41536.9	712.514	219147	1040.81	218077	41536.9	167975	959.634	166952	146538	15172.5	712.514	145586	0	0	15172.5	15172.5	0	572.099	120.488	571.629	0.519408	12348.5	28720.1	44729.9	181.408	132.091	49.3789	99.4832	44.14	54.9708	4306
Median	Guyana	GUY	UMC	Americas	Latin America and the Caribbean	South America	Latin America	795729	0.268337	225998	172231	172231	0	0	0	0	171173	50665.3	928.986	249498	1186.19	248127	50665.3	194175	1168.85	192924	172231	19497.5	928.986	171173	0	0	19497.5	19497.5	0	748.818	169.815	747.791	0.728895	15416.7	34916.5	54086	206.717	150.413	56.3758	124.424	55.3412	69.4074	5754.86
Upper quartile	Guyana	GUY	UMC	Americas	Latin America and the Caribbean	South America	Latin America	795729	0.268337	263304	205095	205095	0	0	0	0	203993	62527.5	1206.66	286905	1351.73	285567	62527.5	227653	1412.49	226304	205095	25411.6	1206.66	203993	0	0	25411.6	25411.6	0	974.795	234.459	973.982	1.02523	19895.1	42759.4	66107.6	236.767	172.35	64.437	159.385	71.0943	88.6624	7745.52
Max	Guyana	GUY	UMC	Americas	Latin America and the Caribbean	South America	Latin America	795729	0.268337	433104	380547	380547	0	0	0	0	379404	159379	2802.21	468861	2472.83	467107	159379	414550	3029.67	411991	380547	54875.1	2802.21	379404	0	0	54875.1	54875.1	0	2485.68	816.166	2483.28	3.80396	59342.3	100620	164452	443.869	326.522	117.346	403.374	183.113	222.987	22088.6
Mean	Hong Kong	HKG	HIC	Asia	Eastern Asia	NA	China	7.42285e+06	0.00460758	5.77089e+06	5.77089e+06	3.72742e+06	2.04347e+06	0	0	2.04347e+06	3.72742e+06	0	0	5.77755e+06	1248.65	5.77631e+06	0	5.77631e+06	1178.25	5.77513e+06	3.72742e+06	2.04771e+06	0	3.72742e+06	0	0	2.04771e+06	4233.7	2.04347e+06	0	0	0	0	0	0	2426.9	218.695	159.151	59.5445	158.309	97.4181	60.8905	97.0443
Min	Hong Kong	HKG	HIC	Asia	Eastern Asia	NA	China	7.42285e+06	0.00460758	5.77089e+06	5.77089e+06	3.72742e+06	2.04347e+06	0	0	2.04347e+06	3.72742e+06	0	0	5.77242e+06	100.5	5.77226e+06	0	5.77226e+06	43.6117	5.77212e+06	3.72742e+06	2.0447e+06	0	3.72742e+06	0	0	2.0447e+06	1222.41	2.04347e+06	0	0	0	0	0	0	162.472	16.1738	11.8159	4.35788	2.38552	1.4278	0.903375	2.27809
Lower quartile	Hong Kong	HKG	HIC	Asia	Eastern Asia	NA	China	7.42285e+06	0.00460758	5.77089e+06	5.77089e+06	3.72742e+06	2.04347e+06	0	0	2.04347e+06	3.72742e+06	0	0	5.77584e+06	640.586	5.77474e+06	0	5.77474e+06	500.552	5.77364e+06	3.72742e+06	2.04622e+06	0	3.72742e+06	0	0	2.04622e+06	2749.07	2.04347e+06	0	0	0	0	0	0	1184.33	111.566	81.1557	30.3021	55.9532	33.902	20.5851	53.8062
Median	Hong Kong	HKG	HIC	Asia	Eastern Asia	NA	China	7.42285e+06	0.00460758	5.77089e+06	5.77089e+06	3.72742e+06	2.04347e+06	0	0	2.04347e+06	3.72742e+06	0	0	5.77747e+06	1101.14	5.77629e+06	0	5.77629e+06	917.851	5.77514e+06	3.72742e+06	2.04772e+06	0	3.72742e+06	0	0	2.04772e+06	4249.66	2.04347e+06	0	0	0	0	0	0	2089.86	192.541	140.597	52.4836	109.489	67.4423	40.8802	87.2417
Upper quartile	Hong Kong	HKG	HIC	Asia	Eastern Asia	NA	China	7.42285e+06	0.00460758	5.77089e+06	5.77089e+06	3.72742e+06	2.04347e+06	0	0	2.04347e+06	3.72742e+06	0	0	5.77911e+06	1740.3	5.77774e+06	0	5.77774e+06	1597.94	5.77656e+06	3.72742e+06	2.04914e+06	0	3.72742e+06	0	0	2.04914e+06	5667.95	2.04347e+06	0	0	0	0	0	0	3303.79	305.177	221.669	82.268	209.277	127.665	79.2908	132.569
Max	Hong Kong	HKG	HIC	Asia	Eastern Asia	NA	China	7.42285e+06	0.00460758	5.77089e+06	5.77089e+06	3.72742e+06	2.04347e+06	0	0	2.04347e+06	3.72742e+06	0	0	5.78655e+06	3992.34	5.78316e+06	0	5.78316e+06	6685.76	5.77859e+06	3.72742e+06	2.05117e+06	0	3.72742e+06	0	0	2.05117e+06	7697.71	2.04347e+06	0	0	0	0	0	0	10364.4	759.915	568.09	204.221	1222.36	861.208	650.172	300.21
Mean	Honduras	HND	LMC	Americas	Latin America and the Caribbean	Central America	Latin America	1.01143e+07	0.409635	2.32739e+06	1.39758e+06	1.39715e+06	0	422.665	0	422.665	414717	929813	982438	2.53557e+06	21797.8	2.51377e+06	929813	1.58396e+06	11707.4	1.57225e+06	1.39715e+06	175095	982438	414717	422.665	0	174673	174673	0	794574	187863	793758	816.42	517047	412767	1.94576e+06	3814.05	2776.1	1037.95	1119.25	468.436	650.817	52926.2
Min	Honduras	HND	LMC	Americas	Latin America and the Caribbean	Central America	Latin America	1.01143e+07	0.409635	2.106e+06	1.2178e+06	1.2178e+06	0	0	0	0	410666	751858	802689	2.26797e+06	18431.9	2.24799e+06	751858	1.38346e+06	7688.68	1.37133e+06	1.2178e+06	83702.6	802689	410666	0	0	83702.6	83702.6	0	591949	103544	591432	438.868	354063	276051	1.72283e+06	3209.58	2335.58	874.003	724.058	289.059	432.802	24830.9
Lower quartile	Honduras	HND	LMC	Americas	Latin America and the Caribbean	Central America	Latin America	1.01143e+07	0.409635	2.28279e+06	1.35792e+06	1.35769e+06	0	0	0	0	415108	892889	942788	2.48249e+06	21108.9	2.46106e+06	892889	1.53379e+06	10660.5	1.52275e+06	1.35769e+06	145067	942788	415108	0	0	144606	144606	0	756826	161846	756067	701.94	479593	377524	1.90063e+06	3689.52	2685.67	1004.19	1016.75	420.316	588.357	42464.1
Median	Honduras	HND	LMC	Americas	Latin America and the Caribbean	Central America	Latin America	1.01143e+07	0.409635	2.32573e+06	1.39535e+06	1.39491e+06	0	0	0	0	415108	928281	980246	2.53261e+06	21777.3	2.5107e+06	928281	1.58111e+06	11570.2	1.56953e+06	1.39491e+06	169436	980246	415108	0	0	169054	169054	0	793764	184168	792993	793.12	517062	412561	1.94396e+06	3806.6	2771.48	1036.07	1106.98	462.526	642.464	50278.5
Upper quartile	Honduras	HND	LMC	Americas	Latin America and the Caribbean	Central America	Latin America	1.01143e+07	0.409635	2.3725e+06	1.43501e+06	1.43443e+06	0	0	0	0	415108	964168	1.01978e+06	2.58566e+06	22466.7	2.56359e+06	964168	1.63095e+06	12554.3	1.61904e+06	1.43443e+06	199447	1.01978e+06	415108	0	0	198664	198664	0	832975	210386	832079	913.098	552783	447375	1.99131e+06	3934.23	2863.23	1070.48	1206.14	508.88	703.08	60148.3
Max	Honduras	HND	LMC	Americas	Latin America and the Caribbean	Central America	Latin America	1.01143e+07	0.409635	2.583e+06	1.60466e+06	1.60206e+06	0	4801.79	0	4801.79	415108	1.12511e+06	1.18936e+06	2.88718e+06	25218.4	2.86371e+06	1.12511e+06	1.9109e+06	19775	1.89867e+06	1.60206e+06	361454	1.18936e+06	415108	4801.79	0	361454	361454	0	981278	326589	980283	1461.52	702280	606549	2.20313e+06	4470.14	3260.13	1214.79	1856.16	824.458	1116.69	142540
Mean	Croatia	HRV	HIC	Europe	Southern Europe	NA	Other EU	4.0904e+06	0.447757	1.97709e+06	1.97528e+06	1.809e+06	148493	17789.1	0	166282	1.809e+06	1806.19	0	1.98292e+06	2002.8	1.98091e+06	1806.19	1.97911e+06	2534.75	1.97657e+06	1.809e+06	167574	0	1.809e+06	17789.1	0	149785	1292.02	148493	0	0	0	0	1192.39	613.804	6343.74	350.479	255.091	95.3881	336.735	207.752	128.983	29.7123
Min	Croatia	HRV	HIC	Europe	Southern Europe	NA	Other EU	4.0904e+06	0.447757	1.83979e+06	1.83779e+06	1.67922e+06	105673	17789.1	0	123462	1.67922e+06	855.249	0	1.84524e+06	1772.87	1.84347e+06	855.249	1.84147e+06	2121.69	1.83924e+06	1.67922e+06	124460	0	1.67922e+06	17789.1	0	106671	821.435	105673	0	0	0	0	544.419	253.982	5118.58	309.258	225.04	84.2188	271.322	168.517	101.515	17.0089
Lower quartile	Croatia	HRV	HIC	Europe	Southern Europe	NA	Other EU	4.0904e+06	0.447757	1.94995e+06	1.9483e+06	1.78259e+06	139510	17789.1	0	157299	1.78259e+06	1563.39	0	1.95574e+06	1954.14	1.95378e+06	1563.39	1.95209e+06	2445.71	1.94954e+06	1.78259e+06	158576	0	1.78259e+06	17789.1	0	140787	1140.77	139510	0	0	0	0	1022.09	517.192	6067.55	341.969	248.876	93.0612	320.399	197.1	122.168	25.1302
Median	Croatia	HRV	HIC	Europe	Southern Europe	NA	Other EU	4.0904e+06	0.447757	1.97666e+06	1.97476e+06	1.80789e+06	147854	17789.1	0	165643	1.80789e+06	1788.31	0	1.98235e+06	1999.95	1.98039e+06	1788.31	1.97852e+06	2528.85	1.97604e+06	1.80789e+06	166960	0	1.80789e+06	17789.1	0	149170	1294.6	147854	0	0	0	0	1175.08	602.814	6321.15	350.071	254.781	95.256	334.285	206.286	127.942	28.8092
Upper quartile	Croatia	HRV	HIC	Europe	Southern Europe	NA	Other EU	4.0904e+06	0.447757	2.00318e+06	2.00144e+06	1.83428e+06	156674	17789.1	0	174463	1.83428e+06	2032.09	0	2.00912e+06	2049.18	2.00708e+06	2032.09	2.00521e+06	2612.72	2.00268e+06	1.83428e+06	175790	0	1.83428e+06	17789.1	0	158001	1440.58	156674	0	0	0	0	1346.83	700.854	6597.86	358.741	261.094	97.634	351.097	216.814	134.586	33.5297
Max	Croatia	HRV	HIC	Europe	Southern Europe	NA	Other EU	4.0904e+06	0.447757	2.11548e+06	2.11352e+06	1.94336e+06	197212	17789.1	0	215001	1.94336e+06	3293.44	0	2.12176e+06	2273.56	2.1196e+06	3293.44	2.11764e+06	3023.01	2.11491e+06	1.94336e+06	216214	0	1.94336e+06	17789.1	0	198425	1738.96	197212	0	0	0	0	2231.01	1143.24	8417.84	398.44	290.074	108.366	439.869	272.355	186.161	54.6199
Mean	Haiti	HTI	LIC	Americas	Latin America and the Caribbean	Caribbean	Latin America	1.12903e+07	0.173579	2.47052e+06	704433	704433	0	0	0	0	0	1.76609e+06	704433	2.69986e+06	53626.7	2.64624e+06	1.76609e+06	880148	17600.5	862548	704433	158114	704433	0	0	0	158114	158114	0	570433	134000	569848	585.965	1.19967e+06	566417	2.54175e+06	9381.7	6827.94	2553.76	2035.34	849.595	1185.74	48073.9
Min	Haiti	HTI	LIC	Americas	Latin America and the Caribbean	Caribbean	Latin America	1.12903e+07	0.173579	2.02166e+06	421355	421355	0	0	0	0	0	1.36071e+06	421355	2.23047e+06	41844.1	2.18572e+06	1.36071e+06	575511	9975.98	564711	421355	102591	421355	0	0	0	102591	102591	0	337253	65135.3	336838	263.507	798592	327084	2.08082e+06	7231.85	5293.25	1938.6	1013.29	425.761	587.532	27446.9
Lower quartile	Haiti	HTI	LIC	Americas	Latin America and the Caribbean	Caribbean	Latin America	1.12903e+07	0.173579	2.38289e+06	631762	631762	0	0	0	0	0	1.67924e+06	631762	2.60772e+06	50923.4	2.55562e+06	1.67924e+06	805103	15658.2	789268	631762	143684	631762	0	0	0	143684	143684	0	508514	113484	508022	494.115	1.12381e+06	509296	2.45122e+06	8897.88	6478.7	2423.26	1770.15	731.164	1025.32	42583.1
Median	Haiti	HTI	LIC	Americas	Latin America and the Caribbean	Caribbean	Latin America	1.12903e+07	0.173579	2.4704e+06	698056	698056	0	0	0	0	0	1.76418e+06	698056	2.69843e+06	53507.3	2.64486e+06	1.76418e+06	872382	17368.4	854857	698056	156393	698056	0	0	0	156393	156393	0	565126	131184	564468	571.908	1.19859e+06	566473	2.54159e+06	9356.2	6806.58	2551.28	1999.62	830.762	1163.82	47301.9
Upper quartile	Haiti	HTI	LIC	Americas	Latin America and the Caribbean	Caribbean	Latin America	1.12903e+07	0.173579	2.55715e+06	767314	767314	0	0	0	0	0	1.85072e+06	767314	2.79079e+06	56160.6	2.73637e+06	1.85072e+06	947007	19371.9	928732	767314	171476	767314	0	0	0	171476	171476	0	623065	150908	622445	664.127	1.27393e+06	623413	2.63091e+06	9840.28	7161.75	2683.59	2255.09	947.571	1322.25	52806.9
Max	Haiti	HTI	LIC	Americas	Latin America and the Caribbean	Caribbean	Latin America	1.12903e+07	0.173579	2.96931e+06	1.10978e+06	1.10978e+06	0	0	0	0	0	2.20092e+06	1.10978e+06	3.19221e+06	68486.8	3.12698e+06	2.20092e+06	1.29676e+06	30430.4	1.27268e+06	1.10978e+06	234132	1.10978e+06	0	0	0	234132	234132	0	972742	280166	971593	1224.8	1.60196e+06	851279	3.05607e+06	12039.8	8737.22	3302.53	3955.2	1807.74	2436.23	80166.9
Mean	Hungary	HUN	HIC	Europe	Eastern Europe	NA	OECD EU countries	9.75067e+06	0.374498	5.4371e+06	5.42779e+06	4.64164e+06	212202	0	573939	786141	4.64164e+06	9318.66	0	5.45127e+06	4736.09	5.44654e+06	9318.66	5.43722e+06	5953.87	5.43126e+06	4.64164e+06	789620	0	4.64164e+06	0	573939	215681	3478.54	212202	0	0	0	0	6152.7	3165.96	20008.6	828.618	603.075	225.543	770.74	475.647	295.092	80.1736
Min	Hungary	HUN	HIC	Europe	Eastern Europe	NA	OECD EU countries	9.75067e+06	0.374498	4.88901e+06	4.8815e+06	4.1501e+06	104505	0	541119	649473	4.1501e+06	2824.51	0	4.90285e+06	3891.7	4.8984e+06	2824.51	4.89089e+06	4672.74	4.88456e+06	4.1501e+06	653492	0	4.1501e+06	0	541119	108525	2467.05	104505	0	0	0	0	1644.46	762.923	13488.2	678.057	494.962	183.094	568.213	349.685	216.503	48.1839
Lower quartile	Hungary	HUN	HIC	Europe	Eastern Europe	NA	OECD EU countries	9.75067e+06	0.374498	5.33061e+06	5.32151e+06	4.53941e+06	188799	0	552777	754969	4.53941e+06	7579.74	0	5.34434e+06	4567.89	5.33995e+06	7579.74	5.33071e+06	5668.71	5.32479e+06	4.53941e+06	758536	0	4.53941e+06	0	552777	192283	3110.2	188799	0	0	0	0	4938.38	2478.76	18238.8	799.286	581.556	217.346	721.027	444.312	275.309	69.2463
Median	Hungary	HUN	HIC	Europe	Eastern Europe	NA	OECD EU countries	9.75067e+06	0.374498	5.43594e+06	5.42608e+06	4.64156e+06	210566	0	569795	783975	4.64156e+06	9140.61	0	5.45008e+06	4725.81	5.44534e+06	9140.61	5.43542e+06	5932.86	5.42936e+06	4.64156e+06	787417	0	4.64156e+06	0	569795	214147	3475.91	210566	0	0	0	0	6020.59	3063.77	19837.6	826.566	601.807	224.946	763.795	471.295	292.024	77.9451
Upper quartile	Hungary	HUN	HIC	Europe	Eastern Europe	NA	OECD EU countries	9.75067e+06	0.374498	5.54103e+06	5.53206e+06	4.74175e+06	234291	0	590538	814556	4.74175e+06	10872.2	0	5.55547e+06	4893.39	5.55062e+06	10872.2	5.54149e+06	6217.5	5.53565e+06	4.74175e+06	818180	0	4.74175e+06	0	590538	237785	3841.58	234291	0	0	0	0	7207.83	3742.33	21598.2	856.463	623.175	233.174	812.105	501.369	312.002	88.8654
Max	Hungary	HUN	HIC	Europe	Eastern Europe	NA	OECD EU countries	9.75067e+06	0.374498	6.05223e+06	6.04642e+06	5.32407e+06	352597	0	709945	1.02473e+06	5.32407e+06	20556.5	0	6.06881e+06	5706.21	6.06346e+06	20556.5	6.05764e+06	7804.91	6.05043e+06	5.32407e+06	1.0284e+06	0	5.32407e+06	0	709945	355921	4619.41	352597	0	0	0	0	14539.6	7470.41	32027.9	1002.74	731.443	275.314	1120.18	677.04	443.14	136.912
Mean	Indonesia	IDN	LMC	Asia	South-eastern Asia	NA	Other non-OECD Asia	2.71016e+08	0.141414	5.85269e+07	4.04955e+07	4.0066e+07	37182.5	392381	0	429564	2.04558e+06	1.80314e+07	3.80204e+07	6.60677e+07	406564	6.56612e+07	1.80314e+07	4.76298e+07	324019	4.73058e+07	4.0066e+07	7.23981e+06	3.80204e+07	2.04558e+06	392381	0	6.84743e+06	6.81025e+06	37182.5	3.07638e+07	7.25658e+06	3.07322e+07	31585.4	1.02314e+07	7.79992e+06	5.67823e+07	71154.1	51788.4	19365.7	40079	16685.2	23393.8	2.06885e+06
Min	Indonesia	IDN	LMC	Asia	South-eastern Asia	NA	Other non-OECD Asia	2.71016e+08	0.141414	5.51077e+07	3.73201e+07	3.69219e+07	20559.3	300525	0	333967	2.04558e+06	1.55772e+07	3.48763e+07	6.20416e+07	377294	6.16643e+07	1.55772e+07	4.3895e+07	280371	4.36127e+07	3.69219e+07	5.84095e+06	3.48763e+07	2.04558e+06	300525	0	5.44195e+06	5.40726e+06	20559.3	2.76297e+07	5.70005e+06	2.76013e+07	25096.8	8.15824e+06	6.41965e+06	5.33766e+07	66006.5	48108.1	17898.4	33551.3	13914	19104.6	1.64818e+06
Lower quartile	Indonesia	IDN	LMC	Asia	South-eastern Asia	NA	Other non-OECD Asia	2.71016e+08	0.141414	5.79279e+07	3.98805e+07	3.94596e+07	33198.7	367725	0	404174	2.04558e+06	1.75359e+07	3.7414e+07	6.54099e+07	400940	6.50062e+07	1.75359e+07	4.69509e+07	315254	4.66327e+07	3.94596e+07	6.95988e+06	3.7414e+07	2.04558e+06	367725	0	6.57077e+06	6.5335e+06	33198.7	3.01966e+07	6.94971e+06	3.01663e+07	30242.9	9.86153e+06	7.49165e+06	5.61779e+07	70149.4	51055.1	19097.2	38649.8	16043.8	22513.8	1.96637e+06
Median	Indonesia	IDN	LMC	Asia	South-eastern Asia	NA	Other non-OECD Asia	2.71016e+08	0.141414	5.85096e+07	4.04887e+07	4.00577e+07	36856.9	388490	0	425740	2.04558e+06	1.80314e+07	3.80121e+07	6.60524e+07	406433	6.56451e+07	1.80314e+07	4.7621e+07	323688	4.72963e+07	4.00577e+07	7.22502e+06	3.80121e+07	2.04558e+06	388490	0	6.82997e+06	6.79191e+06	36856.9	3.07638e+07	7.24437e+06	3.07312e+07	31484	1.02188e+07	7.7891e+06	5.67715e+07	71092.7	51757	19350.7	40033.4	16651.8	23377.7	2.06133e+06
Upper quartile	Indonesia	IDN	LMC	Asia	South-eastern Asia	NA	Other non-OECD Asia	2.71016e+08	0.141414	5.91252e+07	4.11198e+07	4.06849e+07	40752.7	412877	0	450278	2.04558e+06	1.85035e+07	3.86393e+07	6.67083e+07	411922	6.63014e+07	1.85035e+07	4.83058e+07	332692	4.79763e+07	4.06849e+07	7.5021e+06	3.86393e+07	2.04558e+06	412877	0	7.11109e+06	7.07276e+06	40752.7	3.13363e+07	7.53631e+06	3.1304e+07	32839.2	1.05727e+07	8.09433e+06	5.73872e+07	72122.4	52493.8	19633.6	41387.4	17278.5	24225.6	2.16189e+06
Max	Indonesia	IDN	LMC	Asia	South-eastern Asia	NA	Other non-OECD Asia	2.71016e+08	0.141414	6.16325e+07	4.42698e+07	4.37227e+07	58479.3	561687	0	597769	2.04558e+06	2.09762e+07	4.16771e+07	6.95079e+07	436036	6.9086e+07	2.09762e+07	5.13153e+07	377090	5.09757e+07	4.37227e+07	8.69855e+06	4.16771e+07	2.04558e+06	561687	0	8.30649e+06	8.26708e+06	58479.3	3.39765e+07	9.07027e+06	3.39413e+07	40424.3	1.2131e+07	9.59743e+06	5.99594e+07	76402.6	55613	20829.1	49051.9	20688.2	29217.7	2.73898e+06
Mean	Isle of Man	IMN	HIC	Europe	Northern Europe	NA	Other Eurasia	83876.7	0.324662	35623.2	35623.2	27081.3	8533.41	8.44693	0	8541.86	27081.3	0	0	35715.6	35.3737	35680.2	0	35680.2	24.9739	35655.3	27081.3	8573.96	0	27081.3	8.44693	0	8565.52	32.1021	8533.41	0	0	0	0	0	0	60.3476	6.19044	4.50586	1.68458	2.70952	1.67145	1.03806	0.740145
Min	Isle of Man	IMN	HIC	Europe	Northern Europe	NA	Other Eurasia	83876.7	0.324662	23162	23162	17047.6	2917.77	0	0	2948.27	17047.6	0	0	23234.2	21.4324	23210	0	23210	11.4786	23189.5	17047.6	2985.62	0	17047.6	0	0	2955.12	13.0935	2917.77	0	0	0	0	0	0	34.2137	3.67284	2.67073	0.994267	1.11988	0.719377	0.400501	0.248682
Lower quartile	Isle of Man	IMN	HIC	Europe	Northern Europe	NA	Other Eurasia	83876.7	0.324662	32593.6	32593.6	24337.1	6983.98	0	0	6994.68	24337.1	0	0	32679.5	31.6145	32644.2	0	32644.2	21.4942	32623.6	24337.1	7026.83	0	24337.1	0	0	7019.96	26.9924	6983.98	0	0	0	0	0	0	53.6728	5.5315	4.02676	1.50469	2.24722	1.38062	0.852898	0.573507
Median	Isle of Man	IMN	HIC	Europe	Northern Europe	NA	Other Eurasia	83876.7	0.324662	35285.3	35285.3	26713.8	8360.64	0	0	8368.07	26713.8	0	0	35381	34.9167	35345.1	0	35345.1	24.4009	35317.7	26713.8	8399.69	0	26713.8	0	0	8392.48	31.9521	8360.64	0	0	0	0	0	0	59.3888	6.10397	4.44019	1.66178	2.63228	1.61631	1.00445	0.715745
Upper quartile	Isle of Man	IMN	HIC	Europe	Northern Europe	NA	Other Eurasia	83876.7	0.324662	38374.9	38374.9	29461.3	9924.61	5.39206	0	9932.05	29461.3	0	0	38472.3	38.6805	38436.8	0	38436.8	27.8889	38410	29461.3	9966.86	0	29461.3	5.39206	0	9959.19	37.3753	9924.61	0	0	0	0	0	0	66.3463	6.77055	4.93002	1.84052	3.07369	1.89401	1.18001	0.885071
Max	Isle of Man	IMN	HIC	Europe	Northern Europe	NA	Other Eurasia	83876.7	0.324662	51428.7	51428.7	43441.1	16927.2	381.659	0	16927.2	43441.1	0	0	51552	61.9908	51501.3	0	51501.3	50.5401	51468.6	43441.1	16952.9	0	43441.1	381.659	0	16952.6	49.2181	16927.2	0	0	0	0	0	0	107.508	10.5354	7.65823	2.87715	6.2693	4.01379	3.00249	1.61412
Mean	India	IND	LMC	Asia	Southern Asia	NA	India	1.39645e+09	0.167023	2.41911e+08	1.90283e+08	1.82804e+08	0	7.47899e+06	0	7.47899e+06	4.48721e+06	5.16285e+07	1.78317e+08	2.7949e+08	1.79479e+06	2.77695e+08	5.16285e+07	2.26067e+08	1.71964e+06	2.24347e+08	1.82804e+08	4.15435e+07	1.78317e+08	4.48721e+06	7.47899e+06	0	3.40645e+07	3.40645e+07	0	1.44245e+08	3.40721e+07	1.44096e+08	148071	2.91959e+07	2.24327e+07	2.3346e+08	314089	228603	85485.5	171933	71851.1	100082	1.03479e+07
Min	India	IND	LMC	Asia	Southern Asia	NA	India	1.39645e+09	0.167023	2.34829e+08	1.8323e+08	1.76019e+08	0	5.71786e+06	0	5.71786e+06	3.64867e+06	4.75426e+07	1.71341e+08	2.71346e+08	1.72419e+06	2.69622e+08	4.75426e+07	2.18784e+08	1.61142e+06	2.17092e+08	1.76019e+08	3.74483e+07	1.71341e+08	3.64867e+06	5.71786e+06	0	3.04771e+07	3.04771e+07	0	1.38021e+08	3.02862e+07	1.3789e+08	130899	2.61959e+07	1.97071e+07	2.26392e+08	301212	219386	81826.5	158453	64253.4	91411.8	9.27811e+06
Lower quartile	India	IND	LMC	Asia	Southern Asia	NA	India	1.39645e+09	0.167023	2.40432e+08	1.88916e+08	1.8144e+08	0	7.09157e+06	0	7.09157e+06	4.36473e+06	5.07944e+07	1.7695e+08	2.77837e+08	1.7807e+06	2.76047e+08	5.07944e+07	2.2448e+08	1.6972e+06	2.22766e+08	1.8144e+08	4.08128e+07	1.7695e+08	4.36473e+06	7.09157e+06	0	3.34071e+07	3.34071e+07	0	1.42916e+08	3.32596e+07	1.42771e+08	144333	2.85452e+07	2.18262e+07	2.31951e+08	311488	226717	84778.4	168751	70402.7	98186.3	1.01009e+07
Median	India	IND	LMC	Asia	Southern Asia	NA	India	1.39645e+09	0.167023	2.41895e+08	1.90255e+08	1.82777e+08	0	7.4484e+06	0	7.4484e+06	4.50696e+06	5.16102e+07	1.78288e+08	2.79472e+08	1.79429e+06	2.77677e+08	5.16102e+07	2.26079e+08	1.7188e+06	2.24373e+08	1.82777e+08	4.15222e+07	1.78288e+08	4.50696e+06	7.4484e+06	0	3.40389e+07	3.40389e+07	0	1.44218e+08	3.40498e+07	1.4407e+08	147848	2.91746e+07	2.24306e+07	2.33427e+08	313996	228546	85475.1	171869	71797	100037	1.03347e+07
Upper quartile	India	IND	LMC	Asia	Southern Asia	NA	India	1.39645e+09	0.167023	2.43392e+08	1.91613e+08	1.84147e+08	0	7.83558e+06	0	7.83558e+06	4.64722e+06	5.24284e+07	1.79644e+08	2.81097e+08	1.80885e+06	2.79295e+08	5.24284e+07	2.27583e+08	1.74147e+06	2.25852e+08	1.84147e+08	4.22777e+07	1.79644e+08	4.64722e+06	7.83558e+06	0	3.47031e+07	3.47031e+07	0	1.45538e+08	3.48321e+07	1.4539e+08	151483	2.98269e+07	2.30076e+07	2.34949e+08	316598	230417	86190.2	174892	73167.1	101868	1.05776e+07
Max	India	IND	LMC	Asia	Southern Asia	NA	India	1.39645e+09	0.167023	2.49802e+08	1.98188e+08	1.90281e+08	0	9.7742e+06	0	9.7742e+06	4.76415e+06	5.5724e+07	1.86069e+08	2.88066e+08	1.88231e+06	2.86229e+08	5.5724e+07	2.34656e+08	1.8537e+06	2.32918e+08	1.90281e+08	4.57451e+07	1.86069e+08	4.76415e+06	9.7742e+06	0	3.73795e+07	3.73795e+07	0	1.5119e+08	3.89521e+07	1.51041e+08	169714	3.25584e+07	2.60732e+07	2.41089e+08	328024	238553	89486.7	191267	82428.6	111510	1.19207e+07
Mean	Ireland	IRL	HIC	Europe	Northern Europe	NA	OECD EU countries	4.95382e+06	0.451576	2.39139e+06	2.39139e+06	1.38971e+06	726917	15450.3	259311	1.00168e+06	1.38971e+06	0	0	2.39754e+06	2523.39	2.39502e+06	0	2.39502e+06	2084.61	2.39294e+06	1.38971e+06	1.00323e+06	0	1.38971e+06	15450.3	259311	728464	1547.71	726917	0	0	0	0	0	0	4608.01	441.701	321.455	120.246	226.901	139.942	86.9599	35.5869
Min	Ireland	IRL	HIC	Europe	Northern Europe	NA	OECD EU countries	4.95382e+06	0.451576	1.68869e+06	1.68869e+06	828713	428798	0	3484.34	544517	828713	0	0	1.69374e+06	1559.26	1.69218e+06	0	1.69218e+06	1073.95	1.69077e+06	828713	546550	0	828713	0	3484.34	430000	791.023	428798	0	0	0	0	0	0	2785.64	271.95	196.039	73.4232	104.944	62.4473	39.6794	12.9953
Lower quartile	Ireland	IRL	HIC	Europe	Northern Europe	NA	OECD EU countries	4.95382e+06	0.451576	2.22014e+06	2.22014e+06	1.25378e+06	656863	2235.92	164431	875321	1.25378e+06	0	0	2.22582e+06	2273.32	2.22337e+06	0	2.22337e+06	1825.49	2.22153e+06	1.25378e+06	876903	0	1.25378e+06	2235.92	164431	658344	1284.5	656863	0	0	0	0	0	0	4123.81	398.129	289.9	108.294	193.792	118.864	73.6857	27.7072
Median	Ireland	IRL	HIC	Europe	Northern Europe	NA	OECD EU countries	4.95382e+06	0.451576	2.37753e+06	2.37753e+06	1.37663e+06	718543	9456.72	238993	981478	1.37663e+06	0	0	2.38368e+06	2500.25	2.38117e+06	0	2.38117e+06	2042.28	2.37929e+06	1.37663e+06	982874	0	1.37663e+06	9456.72	238993	719826	1546.73	718543	0	0	0	0	0	0	4553.86	437.879	318.436	119.27	221.101	136.319	84.3021	33.9
Upper quartile	Ireland	IRL	HIC	Europe	Northern Europe	NA	OECD EU countries	4.95382e+06	0.451576	2.54765e+06	2.54765e+06	1.51351e+06	789076	21848.7	334628	1.10355e+06	1.51351e+06	0	0	2.55365e+06	2734.29	2.55116e+06	0	2.55116e+06	2305.19	2.54904e+06	1.51351e+06	1.10518e+06	0	1.51351e+06	21848.7	334628	790610	1805.14	789076	0	0	0	0	0	0	5013.87	480.241	349.436	130.741	253.537	157.199	96.9823	42.0368
Max	Ireland	IRL	HIC	Europe	Northern Europe	NA	OECD EU countries	4.95382e+06	0.451576	3.37794e+06	3.37794e+06	2.20246e+06	1.10471e+06	175569	900850	1.87578e+06	2.20246e+06	0	0	3.38714e+06	4297.1	3.38336e+06	0	3.38336e+06	4005.53	3.37994e+06	2.20246e+06	1.87703e+06	0	2.20246e+06	175569	900850	1.10609e+06	2331.7	1.10471e+06	0	0	0	0	0	0	7894	772.093	562.898	209.196	475.734	329.461	187.661	71.7992
Mean	Iran	IRN	UMC	Asia	Southern Asia	NA	Middle East and North Africa	8.72519e+07	0.153104	2.20352e+07	2.05585e+07	1.95874e+07	216797	754313	0	971110	3.65733e+06	1.47676e+06	1.593e+07	2.48209e+07	56135.1	2.47648e+07	1.47676e+06	2.3288e+07	90271.8	2.31977e+07	1.95874e+07	3.61039e+06	1.593e+07	3.65733e+06	754313	0	2.85607e+06	2.63928e+06	216797	1.28899e+07	3.04011e+06	1.28767e+07	13244.9	501147	975617	1.75532e+07	9824.35	7150.51	2673.84	10413.3	4623.64	5789.63	801093
Min	Iran	IRN	UMC	Asia	Southern Asia	NA	Middle East and North Africa	8.72519e+07	0.153104	1.99944e+07	1.86154e+07	1.77132e+07	144155	490727	0	657180	2.59358e+06	1.32225e+06	1.45821e+07	2.2405e+07	51303.3	2.23524e+07	1.32225e+06	2.09734e+07	74774.3	2.08843e+07	1.77132e+07	2.72339e+06	1.45821e+07	2.59358e+06	490727	0	2.15042e+06	1.94894e+06	144155	1.11423e+07	2.15098e+06	1.11297e+07	9202.67	425787	859544	1.61511e+07	8933.35	6500.35	2424.44	8094.5	3594.47	4500.03	539606
Lower quartile	Iran	IRN	UMC	Asia	Southern Asia	NA	Middle East and North Africa	8.72519e+07	0.153104	2.1696e+07	2.02233e+07	1.92365e+07	189468	605603	0	822603	3.44978e+06	1.44199e+06	1.56628e+07	2.44184e+07	55068.6	2.43627e+07	1.44199e+06	2.28944e+07	86806.7	2.28055e+07	1.92365e+07	3.36314e+06	1.56628e+07	3.44978e+06	605603	0	2.6542e+06	2.44106e+06	189468	1.25708e+07	2.77854e+06	1.25574e+07	12059.6	484681	951016	1.72735e+07	9634.2	7010.91	2621.42	9885.09	4380.91	5497.07	726995
Median	Iran	IRN	UMC	Asia	Southern Asia	NA	Middle East and North Africa	8.72519e+07	0.153104	2.20287e+07	2.05558e+07	1.95885e+07	211530	708496	0	928721	3.65865e+06	1.47376e+06	1.59257e+07	2.48225e+07	56084.2	2.47667e+07	1.47376e+06	2.32836e+07	89961.1	2.31931e+07	1.95885e+07	3.5825e+06	1.59257e+07	3.65865e+06	708496	0	2.83361e+06	2.61719e+06	211530	1.2891e+07	3.00631e+06	1.28783e+07	13076.6	499978	974173	1.75492e+07	9817.94	7143.93	2671.98	10361.5	4598.64	5761.79	792527
Upper quartile	Iran	IRN	UMC	Asia	Southern Asia	NA	Middle East and North Africa	8.72519e+07	0.153104	2.23822e+07	2.08945e+07	1.99282e+07	238040	852217	0	1.07343e+06	3.86656e+06	1.50848e+06	1.61906e+07	2.52158e+07	57131.6	2.51589e+07	1.50848e+06	2.36759e+07	93432.9	2.35876e+07	1.99282e+07	3.82898e+06	1.61906e+07	3.86656e+06	852217	0	3.0353e+06	2.82099e+06	238040	1.32128e+07	3.27031e+06	1.31986e+07	14264.6	515270	997553	1.78218e+07	10004.6	7283.12	2723.96	10900.6	4838.62	6057.26	861713
Max	Iran	IRN	UMC	Asia	Southern Asia	NA	Middle East and North Africa	8.72519e+07	0.153104	2.37791e+07	2.22183e+07	2.15038e+07	395769	1.5691e+06	0	1.86082e+06	4.65526e+06	1.67456e+06	1.73213e+07	2.67667e+07	61719.6	2.67092e+07	1.67456e+06	2.51878e+07	118530	2.50868e+07	2.15038e+07	5.13211e+06	1.73213e+07	4.65526e+06	1.5691e+06	0	4.00167e+06	3.76639e+06	395769	1.46135e+07	4.55649e+06	1.45985e+07	19649.9	591686	1.11735e+06	1.90153e+07	10874.9	7940.53	2954.81	13727.8	6025.24	7839.6	1.29274e+06
Mean	Iraq	IRQ	UMC	Asia	Western Asia	NA	Middle East and North Africa	4.25562e+07	0.124228	1.40577e+07	9.29606e+06	9.2946e+06	0	1465.39	0	1465.39	0	4.76161e+06	9.2946e+06	1.54856e+07	45091.3	1.54405e+07	4.76161e+06	1.06789e+07	47234.6	1.06317e+07	9.2946e+06	1.33707e+06	9.2946e+06	0	1465.39	0	1.3356e+06	1.3356e+06	0	7.52105e+06	1.77355e+06	7.5133e+06	7754.84	1.76331e+06	2.9983e+06	1.41485e+07	7890.59	5742.78	2147.81	5686	2524.14	3161.86	406501
Min	Iraq	IRQ	UMC	Asia	Western Asia	NA	Middle East and North Africa	4.25562e+07	0.124228	1.20694e+07	7.7506e+06	7.7506e+06	0	0	0	0	0	3.52369e+06	7.7506e+06	1.32695e+07	37471.9	1.32318e+07	3.52369e+06	8.89808e+06	33598.2	8.86085e+06	7.7506e+06	851343	7.7506e+06	0	0	0	851343	851343	0	5.75631e+06	974056	5.75107e+06	4196.21	1.12696e+06	2.20146e+06	1.21496e+07	6494.51	4724.83	1769.68	3773.83	1659.26	2107.07	246248
Lower quartile	Iraq	IRQ	UMC	Asia	Western Asia	NA	Middle East and North Africa	4.25562e+07	0.124228	1.37136e+07	8.9848e+06	8.98361e+06	0	0	0	0	0	4.51932e+06	8.98361e+06	1.51273e+07	43390.7	1.5082e+07	4.51932e+06	1.03402e+07	44189.1	1.02922e+07	8.98361e+06	1.20766e+06	8.98361e+06	0	0	0	1.20587e+06	1.20587e+06	0	7.1953e+06	1.53465e+06	7.18803e+06	6651.11	1.63996e+06	2.82745e+06	1.38023e+07	7578.9	5516.49	2063.7	5208.08	2312.62	2897.49	360037
Median	Iraq	IRQ	UMC	Asia	Western Asia	NA	Middle East and North Africa	4.25562e+07	0.124228	1.40563e+07	9.2782e+06	9.27703e+06	0	0	0	0	0	4.75113e+06	9.27703e+06	1.54879e+07	45041.4	1.54434e+07	4.75113e+06	1.06658e+07	47030.4	1.06186e+07	9.27703e+06	1.32012e+06	9.27703e+06	0	0	0	1.31876e+06	1.31876e+06	0	7.52062e+06	1.73317e+06	7.51296e+06	7545.76	1.75851e+06	2.9901e+06	1.41484e+07	7875.51	5734.9	2143.68	5625.64	2494.02	3131.56	398253
Upper quartile	Iraq	IRQ	UMC	Asia	Western Asia	NA	Middle East and North Africa	4.25562e+07	0.124228	1.43983e+07	9.5974e+06	9.59648e+06	0	1579.29	0	1579.29	0	4.99725e+06	9.59648e+06	1.58462e+07	46727.2	1.5801e+07	4.99725e+06	1.10168e+07	50018.3	1.09673e+07	9.59648e+06	1.45002e+06	9.59648e+06	0	1579.29	0	1.44861e+06	1.44861e+06	0	7.84845e+06	1.98503e+06	7.83941e+06	8696.56	1.87827e+06	3.16305e+06	1.44923e+07	8181.12	5957.35	2226.73	6099.53	2708.15	3394.96	443636
Max	Iraq	IRQ	UMC	Asia	Western Asia	NA	Middle East and North Africa	4.25562e+07	0.124228	1.61241e+07	1.1212e+07	1.12047e+07	0	19870.5	0	19870.5	0	6.03661e+06	1.12047e+07	1.77136e+07	53655.7	1.76611e+07	6.03661e+06	1.28457e+07	64782.6	1.27858e+07	1.12047e+07	2.03892e+06	1.12047e+07	0	19870.5	0	2.03089e+06	2.03089e+06	0	9.26425e+06	3.12019e+06	9.25548e+06	14854.7	2.47904e+06	3.89127e+06	1.62341e+07	9560.43	6964.09	2596.34	9319.44	4257.51	5061.93	691854
Mean	Iceland	ISL	HIC	Europe	Northern Europe	NA	OECD Non-EU countries	349610	0.234087	176020	176020	65995.3	44875.1	8358.85	56791.2	110025	65995.3	0	0	176384	115.64	176268	0	176268	94.9915	176173	65995.3	110178	0	65995.3	8358.85	56791.2	45028.1	153.068	44875.1	0	0	0	0	0	0	210.631	20.2332	14.7262	5.50699	10.4943	6.46738	4.02694	3.51709
Min	Iceland	ISL	HIC	Europe	Northern Europe	NA	OECD Non-EU countries	349610	0.234087	112674	112674	17767.7	15059.7	759.504	10368.2	46533.9	17767.7	0	0	112985	77.7219	112885	0	112885	53.063	112798	17767.7	46633.2	0	17767.7	759.504	10368.2	15166	74.7763	15059.7	0	0	0	0	0	0	139.295	13.4623	9.80666	3.64632	5.96942	3.58465	2.08447	1.23704
Lower quartile	Iceland	ISL	HIC	Europe	Northern Europe	NA	OECD Non-EU countries	349610	0.234087	159650	159650	48113.5	36626.4	5048.4	39206.5	90976.4	48113.5	0	0	159988	105.775	159881	0	159881	84.5305	159795	48113.5	91137	0	48113.5	5048.4	39206.5	36794.1	129.522	36626.4	0	0	0	0	0	0	191.115	18.4858	13.4643	5.03059	9.11045	5.61855	3.46228	2.76854
Median	Iceland	ISL	HIC	Europe	Northern Europe	NA	OECD Non-EU countries	349610	0.234087	173481	173481	62835.7	43907.2	7647.05	54586.5	107971	62835.7	0	0	173826	113.973	173719	0	173719	93.153	173631	62835.7	108114	0	62835.7	7647.05	54586.5	44082.9	152.901	43907.2	0	0	0	0	0	0	207.809	19.9467	14.5182	5.42737	10.1947	6.28031	3.91205	3.39965
Upper quartile	Iceland	ISL	HIC	Europe	Northern Europe	NA	OECD Non-EU countries	349610	0.234087	190194	190194	80646.4	51627.8	10797.8	72069.4	126351	80646.4	0	0	190554	124.134	190454	0	190454	103.223	190359	80646.4	126498	0	80646.4	10797.8	72069.4	51798.2	177.171	51627.8	0	0	0	0	0	0	226.639	21.7387	15.818	5.91538	11.5684	7.13618	4.44634	4.14347
Max	Iceland	ISL	HIC	Europe	Northern Europe	NA	OECD Non-EU countries	349610	0.234087	254523	254523	160775	88496.7	32647.7	140104	203104	160775	0	0	254943	185.606	254801	0	254801	195.988	254667	160775	203305	0	160775	32647.7	140104	88621.4	232.425	88496.7	0	0	0	0	0	0	381.593	32.4872	23.5914	8.8958	20.8675	12.7801	9.11516	7.44411
Mean	Israel	ISR	HIC	Asia	Western Asia	NA	OECD Non-EU countries	8.75257e+06	0.0659191	4.12611e+06	4.12545e+06	3.62778e+06	497670	0	0	497670	3.62778e+06	661.205	0	4.13445e+06	1795.48	4.13266e+06	661.205	4.132e+06	1886.52	4.13011e+06	3.62778e+06	502328	0	3.62778e+06	0	0	502328	4658.02	497670	0	0	0	0	432.457	228.749	4343.21	313.942	228.546	85.3959	234.483	144.683	89.8002	107.014
Min	Israel	ISR	HIC	Asia	Western Asia	NA	OECD Non-EU countries	8.75257e+06	0.0659191	2.40558e+06	2.40536e+06	2.24361e+06	96600	0	0	96600	2.24361e+06	0	0	2.41193e+06	789.861	2.41075e+06	0	2.41052e+06	615.839	2.40932e+06	2.24361e+06	100672	0	2.24361e+06	0	0	100672	2105.39	96600	0	0	0	0	0	0	1417.75	142.98	103.729	38.7203	59.3161	33.0067	21.5338	33.4952
Lower quartile	Israel	ISR	HIC	Asia	Western Asia	NA	OECD Non-EU countries	8.75257e+06	0.0659191	3.73574e+06	3.73423e+06	3.26612e+06	358973	0	0	358973	3.26612e+06	0	0	3.74432e+06	1520.85	3.7428e+06	0	3.7403e+06	1494.14	3.73887e+06	3.26612e+06	363491	0	3.26612e+06	0	0	363491	4091.02	358973	0	0	0	0	0	0	3275.86	265.408	193.239	72.2675	174.234	107.079	65.248	88.5215
Median	Israel	ISR	HIC	Asia	Western Asia	NA	OECD Non-EU countries	8.75257e+06	0.0659191	4.08578e+06	4.08501e+06	3.58976e+06	470959	0	0	470959	3.58976e+06	0	0	4.09377e+06	1759.13	4.092e+06	0	4.09124e+06	1814.76	4.0895e+06	3.58976e+06	475787	0	3.58976e+06	0	0	475787	4663.68	470959	0	0	0	0	0	0	3911.79	307.776	224.041	83.5171	219.318	135.242	83.5483	105.264
Upper quartile	Israel	ISR	HIC	Asia	Western Asia	NA	OECD Non-EU countries	8.75257e+06	0.0659191	4.48573e+06	4.48456e+06	3.94887e+06	606026	0	0	606026	3.94887e+06	471.603	0	4.49448e+06	2028.57	4.4923e+06	471.603	4.49117e+06	2202.1	4.48904e+06	3.94887e+06	610650	0	3.94887e+06	0	0	610650	5224.21	606026	0	0	0	0	302.473	123.082	4886.79	354.955	258.465	96.7849	279.915	172.91	107.662	124.33
Max	Israel	ISR	HIC	Asia	Western Asia	NA	OECD Non-EU countries	8.75257e+06	0.0659191	6.31233e+06	6.31233e+06	5.67832e+06	1.54715e+06	0	0	1.54715e+06	5.67832e+06	11165.1	0	6.32321e+06	3510	6.31989e+06	11165.1	6.31989e+06	4686.59	6.31776e+06	5.67832e+06	1.55227e+06	0	5.67832e+06	0	0	1.55227e+06	7257.58	1.54715e+06	0	0	0	0	9527.83	6186.82	15761.8	598.704	439.158	163.965	778.714	539.45	290.326	210.851
Mean	Italy	ITA	HIC	Europe	Southern Europe	NA	OECD EU countries	5.94927e+07	0.23262	2.87318e+07	2.87314e+07	2.05022e+07	6.91782e+06	0	1.31141e+06	8.22923e+06	2.05022e+07	366.671	0	2.88075e+07	20660.8	2.87869e+07	366.671	2.87865e+07	29106.3	2.87574e+07	2.05022e+07	8.25523e+06	0	2.05022e+07	0	1.31141e+06	6.94382e+06	26002.2	6.91782e+06	0	0	0	0	242.885	123.786	50133.8	3615.28	2631.32	983.962	4095.4	2527.97	1567.43	598.126
Min	Italy	ITA	HIC	Europe	Southern Europe	NA	OECD EU countries	5.94927e+07	0.23262	2.56281e+07	2.56281e+07	1.76393e+07	4.68432e+06	0	734975	6.00132e+06	1.76393e+07	0	0	2.57046e+07	17910.6	2.56852e+07	0	2.56852e+07	22485	2.56555e+07	1.76393e+07	6.02864e+06	0	1.76393e+07	0	734975	4.70743e+06	20101.4	4.68432e+06	0	0	0	0	0	0	41083.1	3101.41	2255.3	846.106	2965.73	1808.53	1157.2	424.431
Lower quartile	Italy	ITA	HIC	Europe	Southern Europe	NA	OECD EU countries	5.94927e+07	0.23262	2.81385e+07	2.81385e+07	1.98033e+07	6.426e+06	0	1.11221e+06	7.69501e+06	1.98033e+07	0	0	2.82137e+07	20030.4	2.81936e+07	0	2.81934e+07	27756.8	2.81642e+07	1.98033e+07	7.72137e+06	0	1.98033e+07	0	1.11221e+06	6.4528e+06	24822.7	6.426e+06	0	0	0	0	0	0	48230	3502.38	2549.26	952.237	3857.95	2375.43	1470.24	559.431
Median	Italy	ITA	HIC	Europe	Southern Europe	NA	OECD EU countries	5.94927e+07	0.23262	2.87357e+07	2.87351e+07	2.04964e+07	6.90337e+06	0	1.28478e+06	8.21545e+06	2.04964e+07	0	0	2.88108e+07	20622.6	2.87901e+07	0	2.87898e+07	29058.2	2.87601e+07	2.04964e+07	8.24144e+06	0	2.04964e+07	0	1.28478e+06	6.92982e+06	25969.7	6.90337e+06	0	0	0	0	0	0	50018.3	3607.36	2625.56	982.05	4083.44	2517.7	1563.42	595.136
Upper quartile	Italy	ITA	HIC	Europe	Southern Europe	NA	OECD EU countries	5.94927e+07	0.23262	2.93172e+07	2.93169e+07	2.11739e+07	7.3756e+06	0	1.48595e+06	8.72786e+06	2.11739e+07	264.212	0	2.9394e+07	21257.8	2.93733e+07	264.212	2.93731e+07	30401.8	2.93427e+07	2.11739e+07	8.75377e+06	0	2.11739e+07	0	1.48595e+06	7.4012e+06	27122.2	7.3756e+06	0	0	0	0	153.242	30.2947	51875	3720.83	2708.59	1013.18	4318.63	2673.89	1655.72	633.964
Max	Italy	ITA	HIC	Europe	Southern Europe	NA	OECD EU countries	5.94927e+07	0.23262	3.21194e+07	3.21154e+07	2.3891e+07	9.77802e+06	0	2.37572e+06	1.08575e+07	2.3891e+07	7198.52	0	3.22039e+07	24319.6	3.21796e+07	7198.52	3.21756e+07	36220.6	3.21423e+07	2.3891e+07	1.08817e+07	0	2.3891e+07	0	2.37572e+06	9.80467e+06	31508.2	9.77802e+06	0	0	0	0	4889.06	3156.42	63479.4	4317.91	3146.07	1174.73	5567.16	3563.4	2154.01	838.457
Mean	Jamaica	JAM	UMC	Americas	Latin America and the Caribbean	Caribbean	Latin America	2.81703e+06	0.276817	1.01338e+06	823283	823283	0.0305405	0	0	0.0305405	816696	190099	6587.12	1.09436e+06	4271.72	1.09009e+06	190099	899994	3896.04	896098	823283	72815	6587.12	816696	0	0	72815	72815	0.0305405	5323.67	1263.45	5318.19	5.48649	62198.7	127900	204853	747.545	544.141	203.404	458.382	203.561	254.82	22076
Min	Jamaica	JAM	UMC	Americas	Latin America and the Caribbean	Caribbean	Latin America	2.81703e+06	0.276817	614925	480276	480276	0	0	0	0	475798	79687.7	2035.36	694982	2541.28	691866	79687.7	555058	1983.47	552256	480276	30779.4	2035.36	475798	0	0	30779.4	30779.4	0	1573.91	270.499	1572.4	1.00863	27983.5	47454	88709.1	442.234	321.822	120.412	205.578	91.0027	111.301	7992
Lower quartile	Jamaica	JAM	UMC	Americas	Latin America and the Caribbean	Caribbean	Latin America	2.81703e+06	0.276817	918367	738486	738486	0	0	0	0	732579	160236	5395.22	998019	3892.81	994004	160236	813495	3396.81	809901	738486	59587.1	5395.22	732579	0	0	59587.1	59587.1	0	4323.39	927.134	4317.57	3.97719	50022.6	107971	174499	679.867	495.124	184.697	385.674	170.475	213.676	17172.5
Median	Jamaica	JAM	UMC	Americas	Latin America and the Caribbean	Caribbean	Latin America	2.81703e+06	0.276817	1.00601e+06	813318	813318	0	0	0	0	806304	184062	6481.45	1.08579e+06	4239.19	1.08166e+06	184062	889628	3852.35	885892	813318	70904.3	6481.45	806304	0	0	70904.3	70904.3	0	5224.4	1195.37	5218.1	5.19375	59346.9	124028	199042	741.361	539.712	201.884	448.413	198.776	249.572	20990.7
Upper quartile	Jamaica	JAM	UMC	Americas	Latin America and the Caribbean	Caribbean	Latin America	2.81703e+06	0.276817	1.09959e+06	899272	899272	0	0	0	0	892483	214110	7628.3	1.18247e+06	4617.16	1.17807e+06	214110	979360	4351.21	975211	899272	84096.1	7628.3	892483	0	0	84096.1	84096.1	0	6168.91	1529.69	6164.2	6.66118	71383.3	143116	229370	808.61	588.873	220.066	520.825	231.683	289.5	25905
Max	Jamaica	JAM	UMC	Americas	Latin America and the Caribbean	Caribbean	Latin America	2.81703e+06	0.276817	1.52942e+06	1.27054e+06	1.27054e+06	6.38346	0	0	6.38346	1.26244e+06	395608	14692	1.65018e+06	6753.53	1.64343e+06	395608	1.38455e+06	7173.76	1.3796e+06	1.27054e+06	151487	14692	1.26244e+06	0	0	151487	151487	6.38346	12440.8	3752.78	12430.8	15.6537	147842	281787	413967	1173.37	860.141	313.233	1061.63	471.928	589.704	56129
Mean	Jersey	JEY	HIC	Europe	Northern Europe	Channel Islands	Other Eurasia	107836	0.0870181	49199.5	49199.5	40675.1	8523.79	0.581776	0	8524.37	40675.1	0	0	49326.8	33.2135	49293.6	0	49293.6	37.9179	49255.7	40675.1	8580.58	0	40675.1	0.581776	0	8580	56.2091	8523.79	0	0	0	0	0	0	71.1314	5.80967	4.22887	1.5808	4.58294	2.82756	1.75538	1.29327
Min	Jersey	JEY	HIC	Europe	Northern Europe	Channel Islands	Other Eurasia	107836	0.0870181	31759	31759	25470	1919.98	0	0	1919.98	25470	0	0	31864.9	18.5669	31841.7	0	31841.7	17.6713	31815.7	25470	1980.83	0	25470	0	0	1980.83	26.7286	1919.98	0	0	0	0	0	0	38.319	3.07081	2.24408	0.826727	1.99118	1.22135	0.733856	0.500717
Lower quartile	Jersey	JEY	HIC	Europe	Northern Europe	Channel Islands	Other Eurasia	107836	0.0870181	44615.9	44615.9	36420.1	6551.62	0	0	6551.62	36420.1	0	0	44738.9	29.1362	44710.7	0	44710.7	32.265	44680.2	36420.1	6610	0	36420.1	0	0	6608.38	48.495	6551.62	0	0	0	0	0	0	62.1788	5.09182	3.70546	1.38329	3.75623	2.30734	1.42133	1.0388
Median	Jersey	JEY	HIC	Europe	Northern Europe	Channel Islands	Other Eurasia	107836	0.0870181	48387	48387	40015.4	8107.92	0	0	8110.81	40015.4	0	0	48513.5	32.5719	48481.7	0	48481.7	36.9126	48442.6	40015.4	8169.37	0	40015.4	0	0	8167.74	56.1862	8107.92	0	0	0	0	0	0	69.6382	5.69425	4.14336	1.54748	4.43898	2.74459	1.69287	1.25765
Upper quartile	Jersey	JEY	HIC	Europe	Northern Europe	Channel Islands	Other Eurasia	107836	0.0870181	52855.2	52855.2	44165.4	10095.4	0	0	10095.7	44165.4	0	0	52979.5	36.5533	52944.1	0	52944.1	42.6376	52908.6	44165.4	10149.9	0	44165.4	0	0	10149.9	64.0185	10095.4	0	0	0	0	0	0	78.9255	6.39987	4.65502	1.74388	5.22623	3.23312	2.01718	1.50922
Max	Jersey	JEY	HIC	Europe	Northern Europe	Channel Islands	Other Eurasia	107836	0.0870181	71866.3	71866.3	64666	22247.5	28.2507	0	22247.5	64666	0	0	71998.6	61.7807	71959.5	0	71959.5	85.1864	71912.4	64666	22307.8	0	64666	28.2507	0	22307.8	85.2154	22247.5	0	0	0	0	0	0	139.551	10.8746	7.97148	2.99495	10.9867	7.10471	4.26391	2.57179
Mean	Jordan	JOR	UMC	Asia	Western Asia	NA	Middle East and North Africa	1.09283e+07	0.0649402	4.28316e+06	4.15116e+06	4.15116e+06	0	0	0	0	1.67727e+06	132002	2.47388e+06	4.65942e+06	7328.65	4.6521e+06	132002	4.52009e+06	8489.81	4.5116e+06	4.15116e+06	360445	2.47388e+06	1.67727e+06	0	0	360445	360445	0	2.00162e+06	472265	1.99956e+06	2057.75	47457.6	84544.7	2.6217e+06	1282.17	933.27	348.896	1151.38	510.968	640.411	109754
Min	Jordan	JOR	UMC	Asia	Western Asia	NA	Middle East and North Africa	1.09283e+07	0.0649402	3.22962e+06	3.13989e+06	3.13989e+06	0	0	0	0	1.67727e+06	68194.7	1.46261e+06	3.61786e+06	4381.43	3.61159e+06	68194.7	3.49527e+06	4018.68	3.48681e+06	3.13989e+06	103515	1.46261e+06	1.67727e+06	0	0	103515	103515	0	1.11291e+06	148743	1.11156e+06	567.478	21408	42231.1	1.56675e+06	747.016	542.8	204.216	480.577	206.419	272.329	26920.8
Lower quartile	Jordan	JOR	UMC	Asia	Western Asia	NA	Middle East and North Africa	1.09283e+07	0.0649402	4.08392e+06	3.96061e+06	3.96061e+06	0	0	0	0	1.67727e+06	113981	2.28333e+06	4.44645e+06	6622.78	4.43898e+06	113981	4.31432e+06	7193.1	4.3065e+06	3.96061e+06	272982	2.28333e+06	1.67727e+06	0	0	272982	272982	0	1.82104e+06	366838	1.81906e+06	1570.77	39784.2	71941.7	2.42207e+06	1156.23	842.628	313.94	944.344	417.3	524.821	78590.8
Median	Jordan	JOR	UMC	Asia	Western Asia	NA	Middle East and North Africa	1.09283e+07	0.0649402	4.28195e+06	4.14868e+06	4.14868e+06	0	0	0	0	1.67727e+06	129165	2.47141e+06	4.65556e+06	7297.81	4.64788e+06	129165	4.51292e+06	8291.84	4.50438e+06	4.14868e+06	341759	2.47141e+06	1.67727e+06	0	0	341759	341759	0	1.99205e+06	453512	1.98992e+06	1963.24	46140.3	82572.9	2.62086e+06	1272.98	927.08	345.998	1116.22	495.689	622.094	102470
Upper quartile	Jordan	JOR	UMC	Asia	Western Asia	NA	Middle East and North Africa	1.09283e+07	0.0649402	4.48294e+06	4.34376e+06	4.34376e+06	0	0	0	0	1.67727e+06	147234	2.66649e+06	4.88022e+06	7965.85	4.87293e+06	147234	4.72955e+06	9608.74	4.72057e+06	4.34376e+06	430084	2.66649e+06	1.67727e+06	0	0	430084	430084	0	2.18387e+06	561390	2.18183e+06	2461.08	53836.4	95341.8	2.82264e+06	1393.05	1015.06	379.701	1324.95	588.079	737.957	132018
Max	Jordan	JOR	UMC	Asia	Western Asia	NA	Middle East and North Africa	1.09283e+07	0.0649402	5.36786e+06	5.18774e+06	5.18774e+06	0	0	0	0	1.67727e+06	252273	3.51047e+06	5.88296e+06	10568.1	5.87373e+06	252273	5.65296e+06	17063.9	5.64264e+06	5.18774e+06	860579	3.51047e+06	1.67727e+06	0	0	860579	860579	0	2.87655e+06	1.23097e+06	2.87308e+06	4881.11	107267	158543	3.71116e+06	1918.73	1390.92	537.679	2543.14	1142.49	1486.43	330430
Mean	Japan	JPN	HIC	Asia	Eastern Asia	NA	OECD Pacific	1.24839e+08	0.0890467	4.71963e+07	4.71963e+07	5.85497e+06	9.11544e+06	16944.2	3.2209e+07	4.13413e+07	5.85497e+06	0	0	4.73021e+07	22008.9	4.72801e+07	0	4.72801e+07	19049.9	4.72611e+07	5.85497e+06	4.14061e+07	0	5.85497e+06	16944.2	3.2209e+07	9.18021e+06	64770.2	9.11544e+06	0	0	0	0	0	0	41058.8	3851.82	2803.47	1048.35	2373.51	1464.35	909.152	1490.74
Min	Japan	JPN	HIC	Asia	Eastern Asia	NA	OECD Pacific	1.24839e+08	0.0890467	4.58266e+07	4.58266e+07	4.81899e+06	8.08488e+06	6439.21	3.05864e+07	3.94069e+07	4.81899e+06	0	0	4.59298e+07	20358.9	4.59087e+07	0	4.59087e+07	17357.4	4.58894e+07	4.81899e+06	3.94727e+07	0	4.81899e+06	6439.21	3.05864e+07	8.1508e+06	58701.2	8.08488e+06	0	0	0	0	0	0	37859.8	3553.73	2585.71	968.021	2143.6	1325.55	809.331	1293.54
Lower quartile	Japan	JPN	HIC	Asia	Eastern Asia	NA	OECD Pacific	1.24839e+08	0.0890467	4.69171e+07	4.69171e+07	5.58399e+06	8.92374e+06	11194	3.19205e+07	4.09823e+07	5.58399e+06	0	0	4.70245e+07	21674.3	4.70021e+07	0	4.70021e+07	18669.3	4.69829e+07	5.58399e+06	4.10477e+07	0	5.58399e+06	11194	3.19205e+07	8.98873e+06	63530.1	8.92374e+06	0	0	0	0	0	0	40383.8	3792.99	2760.53	1032.38	2317.71	1429.65	886.478	1448.96
Median	Japan	JPN	HIC	Asia	Eastern Asia	NA	OECD Pacific	1.24839e+08	0.0890467	4.71931e+07	4.71931e+07	5.81659e+06	9.11182e+06	13663.2	3.22235e+07	4.13575e+07	5.81659e+06	0	0	4.72987e+07	21996.3	4.72764e+07	0	4.72764e+07	19026.5	4.7258e+07	5.81659e+06	4.14224e+07	0	5.81659e+06	13663.2	3.22235e+07	9.17678e+06	64775.5	9.11182e+06	0	0	0	0	0	0	41027.6	3850.45	2802.38	1048.02	2370.65	1462.18	907.876	1488.32
Upper quartile	Japan	JPN	HIC	Asia	Eastern Asia	NA	OECD Pacific	1.24839e+08	0.0890467	4.7463e+07	4.7463e+07	6.09073e+06	9.30596e+06	18259.4	3.2512e+07	4.17017e+07	6.09073e+06	0	0	4.7569e+07	22325.6	4.75469e+07	0	4.75469e+07	19411.8	4.75275e+07	6.09073e+06	4.17657e+07	0	6.09073e+06	18259.4	3.2512e+07	9.37146e+06	65996.9	9.30596e+06	0	0	0	0	0	0	41698.2	3907.67	2844.02	1063.52	2424.75	1496.56	930.541	1530.49
Max	Japan	JPN	HIC	Asia	Eastern Asia	NA	OECD Pacific	1.24839e+08	0.0890467	4.86183e+07	4.86183e+07	7.30524e+06	1.00812e+07	80684.5	3.38449e+07	4.31187e+07	7.30524e+06	0	0	4.87263e+07	23802.6	4.87035e+07	0	4.87035e+07	21233.3	4.86842e+07	7.30524e+06	4.31831e+07	0	7.30524e+06	80684.5	3.38449e+07	1.01454e+07	70946.5	1.00812e+07	0	0	0	0	0	0	44583.6	4172.52	3040.03	1137.05	2676.13	1706.44	1059.57	1779.09
Mean	Kazakhstan	KAZ	UMC	Asia	Central Asia	NA	Other Eurasia	1.89847e+07	0.234665	6.18221e+06	5.17128e+06	4.95327e+06	195837	22168.3	0	218005	33917.7	1.01093e+06	4.91936e+06	6.76039e+06	25957.3	6.73443e+06	1.01093e+06	5.7235e+06	30757.4	5.69275e+06	4.95327e+06	739474	4.91936e+06	33917.7	22168.3	0	717306	521469	195837	3.98084e+06	938519	3.97674e+06	4092.55	317904	693024	5.987e+06	4541.74	3305.6	1236.14	3465.94	1538.79	1927.15	158267
Min	Kazakhstan	KAZ	UMC	Asia	Central Asia	NA	Other Eurasia	1.89847e+07	0.234665	5.37348e+06	4.48206e+06	4.30662e+06	127802	19022.7	0	146825	30690.6	802462	4.27234e+06	5.97188e+06	22739.4	5.94802e+06	802462	5.00885e+06	24064.7	4.98214e+06	4.30662e+06	530438	4.27234e+06	30690.6	19022.7	0	511415	334850	127802	3.31002e+06	579846	3.30616e+06	2591.37	244792	547621	5.21267e+06	3976.41	2895.63	1078.57	2508.75	1139.07	1369.67	96331.3
Lower quartile	Kazakhstan	KAZ	UMC	Asia	Central Asia	NA	Other Eurasia	1.89847e+07	0.234665	6.01294e+06	5.01867e+06	4.79914e+06	177993	19022.7	0	199476	34241.9	963072	4.76534e+06	6.5844e+06	25236.6	6.55932e+06	963072	5.56115e+06	29338.8	5.53152e+06	4.79914e+06	685455	4.76534e+06	34241.9	19022.7	0	663618	470305	177993	3.83782e+06	856705	3.83411e+06	3719.1	297821	659567	5.81473e+06	4413.13	3211.29	1201.01	3250.42	1441.59	1807.54	140301
Median	Kazakhstan	KAZ	UMC	Asia	Central Asia	NA	Other Eurasia	1.89847e+07	0.234665	6.17102e+06	5.16205e+06	4.94473e+06	194400	19022.7	0	216236	34278.8	1.00765e+06	4.91066e+06	6.75153e+06	25944.7	6.72569e+06	1.00765e+06	5.716e+06	30691.6	5.68502e+06	4.94473e+06	734812	4.91066e+06	34278.8	19022.7	0	713234	516848	194400	3.97788e+06	931246	3.97365e+06	4063.38	316889	690718	5.9757e+06	4538.58	3303.77	1235.47	3453.15	1533	1920.44	155633
Upper quartile	Kazakhstan	KAZ	UMC	Asia	Central Asia	NA	Other Eurasia	1.89847e+07	0.234665	6.34315e+06	5.31323e+06	5.09607e+06	212240	19344.2	0	234743	34278.8	1.05619e+06	5.062e+06	6.92882e+06	26640.4	6.90219e+06	1.05619e+06	5.87664e+06	32069.9	5.8451e+06	5.09607e+06	787393	5.062e+06	34278.8	19344.2	0	765310	565856	212240	4.11214e+06	1.01054e+06	4.10787e+06	4420.71	335699	723973	6.14785e+06	4662.81	3393.36	1269.53	3663.38	1626.74	2037.76	173168
Max	Kazakhstan	KAZ	UMC	Asia	Central Asia	NA	Other Eurasia	1.89847e+07	0.234665	7.13582e+06	6.03488e+06	5.80196e+06	307833	50279	0	326856	34278.8	1.31128e+06	5.76768e+06	7.74395e+06	30195.2	7.71539e+06	1.31128e+06	6.6282e+06	38114	6.59391e+06	5.80196e+06	1.06028e+06	5.76768e+06	34278.8	50279	0	1.02833e+06	800219	307833	4.97664e+06	1.44624e+06	4.9718e+06	6280.71	437304	896047	6.93956e+06	5302.48	3860.61	1441.87	4635.32	2091.49	2578.2	268963
Mean	Kenya	KEN	LMC	Africa	Sub-Saharan Africa	Eastern Africa	Other Africa	5.2181e+07	0.247252	9.56726e+06	4.11231e+06	4.11229e+06	0	17.7752	0	17.7752	0	5.45495e+06	4.11229e+06	1.09072e+07	128046	1.07791e+07	5.45495e+06	5.32419e+06	61614	5.26257e+06	4.11229e+06	1.15028e+06	4.11229e+06	0	17.7752	0	1.15027e+06	1.15027e+06	0	3.32436e+06	787926	3.32095e+06	3412.39	3.06937e+06	2.38557e+06	9.7569e+06	22411.5	16311.7	6099.82	5275.97	2290.31	2985.66	349981
Min	Kenya	KEN	LMC	Africa	Sub-Saharan Africa	Eastern Africa	Other Africa	5.2181e+07	0.247252	8.33317e+06	3.43454e+06	3.43454e+06	0	0	0	0	0	4.66053e+06	3.43454e+06	9.42178e+06	103630	9.31815e+06	4.66053e+06	4.53486e+06	41440.3	4.49206e+06	3.43454e+06	678315	3.43454e+06	0	0	0	678315	678315	0	2.57133e+06	345521	2.56893e+06	1780.62	2.20755e+06	1.55775e+06	8.4902e+06	17757.2	12902.4	4854.78	3124.47	1344.2	1745.17	188930
Lower quartile	Kenya	KEN	LMC	Africa	Sub-Saharan Africa	Eastern Africa	Other Africa	5.2181e+07	0.247252	9.33312e+06	3.98456e+06	3.98456e+06	0	0	0	0	0	5.28731e+06	3.98456e+06	1.06479e+07	123707	1.05234e+07	5.28731e+06	5.15668e+06	57447	5.09706e+06	3.98456e+06	1.03979e+06	3.98456e+06	0	0	0	1.03979e+06	1.03979e+06	0	3.18902e+06	690264	3.18594e+06	2963.24	2.87943e+06	2.20601e+06	9.51732e+06	21637	15750.5	5887.39	4789.45	2056.89	2702.94	310014
Median	Kenya	KEN	LMC	Africa	Sub-Saharan Africa	Eastern Africa	Other Africa	5.2181e+07	0.247252	9.57033e+06	4.10898e+06	4.10898e+06	0	0	0	0	0	5.45107e+06	4.10898e+06	1.08936e+07	127896	1.07672e+07	5.45107e+06	5.32184e+06	61461.8	5.25957e+06	4.10898e+06	1.13867e+06	4.10898e+06	0	0	0	1.13867e+06	1.13867e+06	0	3.32577e+06	772575	3.32224e+06	3342.43	3.06154e+06	2.38605e+06	9.75941e+06	22390.1	16295.3	6093.64	5232.02	2259.97	2960.13	344541
Upper quartile	Kenya	KEN	LMC	Africa	Sub-Saharan Africa	Eastern Africa	Other Africa	5.2181e+07	0.247252	9.79728e+06	4.23423e+06	4.23408e+06	0	0	0	0	0	5.62474e+06	4.23408e+06	1.11631e+07	132251	1.10315e+07	5.62474e+06	5.48188e+06	65371.2	5.41957e+06	4.23408e+06	1.25173e+06	4.23408e+06	0	0	0	1.25173e+06	1.25173e+06	0	3.45988e+06	876013	3.45632e+06	3795.35	3.25268e+06	2.55998e+06	9.99175e+06	23163.8	16858.4	6302.3	5706.29	2492.76	3234.6	385232
Max	Kenya	KEN	LMC	Africa	Sub-Saharan Africa	Eastern Africa	Other Africa	5.2181e+07	0.247252	1.07813e+07	4.75516e+06	4.75516e+06	0	596.027	0	596.027	0	6.53372e+06	4.75516e+06	1.23011e+07	152086	1.2149e+07	6.53372e+06	6.20913e+06	89953.8	6.13902e+06	4.75516e+06	1.91236e+06	4.75516e+06	0	596.027	0	1.91236e+06	1.91236e+06	0	4.20134e+06	1.37037e+06	4.1959e+06	6026.57	4.02237e+06	3.34412e+06	1.09848e+07	27056.6	19583.9	7472.7	8099.71	3735.23	4832.74	606288
Mean	Kyrgyzstan	KGZ	LMC	Asia	Central Asia	NA	Other Eurasia	6.30095e+06	0.246762	2.7224e+06	1.8945e+06	1.8945e+06	0	0	0	0	784911	827904	1.10959e+06	2.89931e+06	20800.6	2.87851e+06	827904	2.0506e+06	16520.4	2.03408e+06	1.8945e+06	139586	1.10959e+06	784911	0	0	139586	139586	0	896358	213229	895433	924.823	465853	362051	1.97481e+06	3640.91	2649.82	991.086	1642.75	687.532	955.214	42371.4
Min	Kyrgyzstan	KGZ	LMC	Asia	Central Asia	NA	Other Eurasia	6.30095e+06	0.246762	1.50061e+06	1.17734e+06	1.17734e+06	0	0	0	0	784911	256112	392432	1.59459e+06	6880.22	1.58771e+06	256112	1.29476e+06	5479.85	1.28745e+06	1.17734e+06	48271.8	392432	784911	0	0	48271.8	48271.8	0	342177	38322.3	341908	163.625	112502	68366.1	728060	1220.05	891.878	328.172	424.334	154.893	226.382	11816.2
Lower quartile	Kyrgyzstan	KGZ	LMC	Asia	Central Asia	NA	Other Eurasia	6.30095e+06	0.246762	2.47437e+06	1.69935e+06	1.69935e+06	0	0	0	0	784911	653367	914442	2.64449e+06	17908.9	2.625e+06	653367	1.85137e+06	13202.2	1.8368e+06	1.69935e+06	111756	914442	784911	0	0	111756	111756	0	729794	150653	729045	656.256	347554	257057	1.72303e+06	3129.77	2277.62	851.528	1244.41	509.464	717.584	32396.6
Median	Kyrgyzstan	KGZ	LMC	Asia	Central Asia	NA	Other Eurasia	6.30095e+06	0.246762	2.71362e+06	1.87836e+06	1.87836e+06	0	0	0	0	784911	799167	1.09345e+06	2.89054e+06	20376.5	2.87008e+06	799167	2.03763e+06	15999.4	2.02149e+06	1.87836e+06	135227	1.09345e+06	784911	0	0	135227	135227	0	879891	200769	878948	868.215	442608	340120	1.96408e+06	3563.29	2595.67	970.046	1555.13	642.78	892.908	40167.1
Upper quartile	Kyrgyzstan	KGZ	LMC	Asia	Central Asia	NA	Other Eurasia	6.30095e+06	0.246762	2.96355e+06	2.07257e+06	2.07257e+06	0	0	0	0	784911	973629	1.28766e+06	3.14649e+06	23329.7	3.1226e+06	973629	2.23345e+06	19302	2.21467e+06	2.07257e+06	162989	1.28766e+06	784911	0	0	162989	162989	0	1.04403e+06	263343	1.04273e+06	1121.45	559219	439206	2.22183e+06	4089.42	2975.16	1114.4	1949.64	816.984	1137.8	50336.9
Max	Kyrgyzstan	KGZ	LMC	Asia	Central Asia	NA	Other Eurasia	6.30095e+06	0.246762	4.02823e+06	2.94091e+06	2.94091e+06	0	0	0	0	784911	1.7508e+06	2.156e+06	4.25852e+06	37675.2	4.23059e+06	1.7508e+06	3.1028e+06	36222.7	3.06668e+06	2.94091e+06	325595	2.156e+06	784911	0	0	325595	325595	0	1.93369e+06	719766	1.93261e+06	2841.47	1.26539e+06	1.05333e+06	3.29892e+06	6673.76	4868.31	1816.54	5329.32	2568.86	3004.15	115195
Mean	Cambodia	KHM	LMC	Asia	South-eastern Asia	NA	Other non-OECD Asia	1.63872e+07	0.326796	6.23553e+06	3.90139e+06	3.90038e+06	0	1013.67	0	1013.67	0	2.33414e+06	3.90038e+06	6.68161e+06	66937.8	6.61468e+06	2.33414e+06	4.28054e+06	55799.5	4.22474e+06	3.90038e+06	324355	3.90038e+06	0	1013.67	0	323342	323342	0	3.15347e+06	746906	3.15024e+06	3236.37	1.30694e+06	1.0272e+06	6.35726e+06	11715.8	8527.47	3188.38	7111.2	2951.83	4159.37	98232.7
Min	Cambodia	KHM	LMC	Asia	South-eastern Asia	NA	Other non-OECD Asia	1.63872e+07	0.326796	5.55738e+06	3.37343e+06	3.37242e+06	0	1013.67	0	1013.67	0	1.91923e+06	3.37242e+06	5.99103e+06	58281.8	5.92832e+06	1.91923e+06	3.7387e+06	43033.8	3.69258e+06	3.37242e+06	218451	3.37242e+06	0	1013.67	0	217437	217437	0	2.54545e+06	456381	2.54288e+06	2014.41	1.02949e+06	758739	5.66411e+06	10201.7	7422.85	2778.81	5201.68	2167.87	3033.81	64987.6
Lower quartile	Cambodia	KHM	LMC	Asia	South-eastern Asia	NA	Other non-OECD Asia	1.63872e+07	0.326796	6.10792e+06	3.79405e+06	3.79303e+06	0	1013.67	0	1013.67	0	2.24724e+06	3.79303e+06	6.54735e+06	65141.2	6.48224e+06	2.24724e+06	4.16981e+06	53127.2	4.11555e+06	3.79303e+06	292583	3.79303e+06	0	1013.67	0	291570	291570	0	3.04622e+06	669595	3.04305e+06	2890.7	1.23926e+06	967160	6.22784e+06	11393.3	8292.27	3099.24	6692.38	2768.63	3898.64	87055.6
Median	Cambodia	KHM	LMC	Asia	South-eastern Asia	NA	Other non-OECD Asia	1.63872e+07	0.326796	6.23649e+06	3.90063e+06	3.89962e+06	0	1013.67	0	1013.67	0	2.32959e+06	3.89962e+06	6.68094e+06	66885	6.6141e+06	2.32959e+06	4.27905e+06	55627.8	4.22273e+06	3.89962e+06	317749	3.89962e+06	0	1013.67	0	316735	316735	0	3.15511e+06	734129	3.1519e+06	3175.68	1.30388e+06	1.02431e+06	6.35708e+06	11703.6	8518.7	3186.45	7083	2935.44	4144.52	95390
Upper quartile	Cambodia	KHM	LMC	Asia	South-eastern Asia	NA	Other non-OECD Asia	1.63872e+07	0.326796	6.3661e+06	4.00382e+06	4.00281e+06	0	1013.67	0	1013.67	0	2.41801e+06	4.00281e+06	6.81477e+06	68760.3	6.74695e+06	2.41801e+06	4.3899e+06	58333.1	4.33157e+06	4.00281e+06	349351	4.00281e+06	0	1013.67	0	348338	348338	0	3.2631e+06	813281	3.25964e+06	3526.4	1.37088e+06	1.08354e+06	6.49008e+06	12036.2	8759.88	3275.73	7494.35	3120.54	4390.92	106585
Max	Cambodia	KHM	LMC	Asia	South-eastern Asia	NA	Other non-OECD Asia	1.63872e+07	0.326796	6.86155e+06	4.44565e+06	4.44463e+06	0	1013.67	0	1013.67	0	2.85436e+06	4.44463e+06	7.28628e+06	77229.7	7.21305e+06	2.85436e+06	4.90286e+06	73533.4	4.82933e+06	4.44463e+06	525981	4.44463e+06	0	1013.67	0	524967	524967	0	3.66925e+06	1.17824e+06	3.66489e+06	5089.72	1.71335e+06	1.46724e+06	6.99813e+06	13577.8	9868.94	3712.19	9776.38	4266.75	5904.62	205121
Mean	Kiribati	KIR	LMC	Oceania	Micronesia	NA	Other non-OECD Asia	123847	0.385662	22602.1	8588.8	8588.8	0	0	0	0	0	14013.3	8588.8	25214.9	299.758	24915.1	14013.3	10901.8	118.33	10783.5	8588.8	2194.69	8588.8	0	0	0	2194.69	2194.69	0	6955.61	1633.2	6948.47	7.1329	7778.23	6235.08	23020.2	52.4776	38.1873	14.2903	7.79794	3.24478	4.55317	661.431
Min	Kiribati	KIR	LMC	Oceania	Micronesia	NA	Other non-OECD Asia	123847	0.385662	22602.1	8588.8	8588.8	0	0	0	0	0	14013.3	8588.8	23022	238.863	22755.8	14013.3	8742.49	16.9472	8700.63	8588.8	111.83	8588.8	0	0	0	111.83	111.83	0	2267.71	4.94041	2267.23	0.348093	2171.34	616.293	22873.4	36.0251	26.3364	9.48858	1.11682	0.169094	0.581196	8.36629
Lower quartile	Kiribati	KIR	LMC	Oceania	Micronesia	NA	Other non-OECD Asia	123847	0.385662	22602.1	8588.8	8588.8	0	0	0	0	0	14013.3	8588.8	24055.6	278.104	23770.9	14013.3	9757.59	77.3926	9653.05	8588.8	1064.25	8588.8	0	0	0	1064.25	1064.25	0	6310.55	759.736	6303.54	3.16829	4930.93	3388.64	22970.1	47.8711	34.7937	12.95	5.10018	1.94016	2.85763	272.008
Median	Kiribati	KIR	LMC	Oceania	Micronesia	NA	Other non-OECD Asia	123847	0.385662	22602.1	8588.8	8588.8	0	0	0	0	0	14013.3	8588.8	24841.3	296.038	24538.2	14013.3	10524.9	111.533	10412.8	8588.8	1823.98	8588.8	0	0	0	1823.98	1823.98	0	7148.4	1440.4	7140.41	6.07227	7755.36	6257.95	23011.4	51.9645	37.8135	14.1517	7.35005	2.94001	4.23751	517.82
Upper quartile	Kiribati	KIR	LMC	Oceania	Micronesia	NA	Other non-OECD Asia	123847	0.385662	22602.1	8588.8	8588.8	0	0	0	0	0	14013.3	8588.8	26070.2	317.731	25765.2	14013.3	11751.9	152.327	11620.5	8588.8	3031.65	8588.8	0	0	0	3031.65	3031.65	0	7829.07	2278.25	7819.64	9.91904	10624.7	9082.37	23061.6	56.4206	41.1532	15.4462	10.0383	4.1958	5.84465	897.555
Max	Kiribati	KIR	LMC	Oceania	Micronesia	NA	Other non-OECD Asia	123847	0.385662	22602.1	8588.8	8588.8	0	0	0	0	0	14013.3	8588.8	33055.5	434.082	32660.9	14013.3	18647.6	388.007	18428.3	8588.8	9839.46	8588.8	0	0	0	9839.46	9839.46	0	8583.86	6321.09	8574.23	30.6755	13397	11842	23362.9	81.8384	59.054	22.8478	25.5696	16.206	14.9953	3744.51
Mean	Saint Kitts and Nevis	KNA	HIC	Americas	Latin America and the Caribbean	Caribbean	Latin America	47541.4	0.577092	30615.5	30386.3	28597.5	1788.85	0	0	1788.85	28597.5	229.17	0	30703.5	36.3157	30667.2	229.17	30438	40.2293	30397.8	28597.5	1800.35	0	28597.5	0	0	1800.35	11.4969	1788.85	0	0	0	0	151.399	77.7714	305.715	6.35477	4.6246	1.73017	5.52135	3.40688	2.11447	0.264583
Min	Saint Kitts and Nevis	KNA	HIC	Americas	Latin America and the Caribbean	Caribbean	Latin America	47541.4	0.577092	18868.9	18768.7	17798	24.327	0	0	24.327	17798	0	0	18924.5	21.1386	18902.2	0	18802	18.7731	18776.1	17798	36.0203	0	17798	0	0	36.0203	4.70243	24.327	0	0	0	0	0	0	51.424	3.70344	2.68286	1.00904	2.0666	1.2042	0.806517	0.0691575
Lower quartile	Saint Kitts and Nevis	KNA	HIC	Americas	Latin America and the Caribbean	Caribbean	Latin America	47541.4	0.577092	28263.4	28049.2	26290.6	1107.56	0	0	1107.56	26290.6	143.339	0	28346.6	32.3723	28309.8	143.339	28096.8	34.318	28060.1	26290.6	1119.02	0	26290.6	0	0	1119.02	9.38255	1107.56	0	0	0	0	92.9794	43.8465	218.985	5.6486	4.11307	1.53665	4.57225	2.8113	1.72666	0.199203
Median	Saint Kitts and Nevis	KNA	HIC	Americas	Latin America and the Caribbean	Caribbean	Latin America	47541.4	0.577092	30734.3	30496.4	28662	1624.37	0	0	1624.37	28662	212.591	0	30826.3	35.9716	30791.7	212.591	30548.1	39.5466	30509.4	28662	1636.59	0	28662	0	0	1636.59	11.4806	1624.37	0	0	0	0	138.924	69.0916	287.94	6.31599	4.59501	1.71586	5.35973	3.30526	2.0571	0.251741
Upper quartile	Saint Kitts and Nevis	KNA	HIC	Americas	Latin America and the Caribbean	Caribbean	Latin America	47541.4	0.577092	33059.7	32809	30977.5	2275.86	0	0	2275.86	30977.5	299.321	0	33153.4	39.9731	33115.5	299.321	32861.9	45.2314	32820.8	30977.5	2287.83	0	30977.5	0	0	2287.83	13.5963	2275.86	0	0	0	0	197.913	102.767	376.924	6.98748	5.08553	1.90372	6.28352	3.88498	2.41436	0.320419
Max	Saint Kitts and Nevis	KNA	HIC	Americas	Latin America and the Caribbean	Caribbean	Latin America	47541.4	0.577092	40412.6	40365.8	38157.4	6551.56	0	0	6551.56	38157.4	878.659	0	40559.7	63.2726	40505.6	878.659	40458.9	79.5558	40379.3	38157.4	6561.02	0	38157.4	0	0	6561.02	18.7723	6551.56	0	0	0	0	655.956	455.971	969.213	10.4481	7.61833	2.83391	13.391	7.99641	5.3946	0.594973
Mean	South Korea	KOR	HIC	Asia	Eastern Asia	NA	OECD Pacific	5.1548e+07	0.0987615	1.98795e+07	1.98795e+07	1.16564e+07	4.57234e+06	1.65371e+06	1.99705e+06	8.22309e+06	1.16564e+07	0	0	1.99253e+07	8698.74	1.99166e+07	0	1.99166e+07	10532.9	1.9906e+07	1.16564e+07	8.24964e+06	0	1.16564e+07	1.65371e+06	1.99705e+06	4.59888e+06	26541.5	4.57234e+06	0	0	0	0	0	0	19231.6	1522.6	1108.07	414.523	1258.84	777.045	481.791	609.218
Min	South Korea	KOR	HIC	Asia	Eastern Asia	NA	OECD Pacific	5.1548e+07	0.0987615	1.56818e+07	1.56818e+07	5.8815e+06	2.04964e+06	939586	259196	4.03982e+06	5.8815e+06	0	0	1.57266e+07	5170.52	1.57192e+07	0	1.57192e+07	4288.14	1.57124e+07	5.8815e+06	4.07358e+06	0	5.8815e+06	939586	259196	2.07111e+06	13988.7	2.04964e+06	0	0	0	0	0	0	9607.75	934.321	678.743	255.578	474.384	289.234	176.891	238.708
Lower quartile	South Korea	KOR	HIC	Asia	Eastern Asia	NA	OECD Pacific	5.1548e+07	0.0987615	1.87861e+07	1.87861e+07	1.02502e+07	3.85195e+06	1.18445e+06	929201	6.86708e+06	1.02502e+07	0	0	1.88287e+07	7797.04	1.88206e+07	0	1.88206e+07	8981.05	1.88104e+07	1.02502e+07	6.89195e+06	0	1.02502e+07	1.18445e+06	929201	3.87721e+06	23644.3	3.85195e+06	0	0	0	0	0	0	17001.4	1363.63	992.355	370.115	1025.12	628.428	388.313	512.331
Median	South Korea	KOR	HIC	Asia	Eastern Asia	NA	OECD Pacific	5.1548e+07	0.0987615	1.97147e+07	1.97147e+07	1.16698e+07	4.48351e+06	1.42539e+06	1.468e+06	7.94931e+06	1.16698e+07	0	0	1.97588e+07	8596.57	1.97506e+07	0	1.97506e+07	10283.4	1.97421e+07	1.16698e+07	7.97418e+06	0	1.16698e+07	1.42539e+06	1.468e+06	4.51037e+06	26581	4.48351e+06	0	0	0	0	0	0	18882.6	1503.81	1095.12	409.621	1210.77	743.542	462.597	601.393
Upper quartile	South Korea	KOR	HIC	Asia	Eastern Asia	NA	OECD Pacific	5.1548e+07	0.0987615	2.0822e+07	2.0822e+07	1.3033e+07	5.23998e+06	1.95541e+06	2.72519e+06	9.30832e+06	1.3033e+07	0	0	2.08663e+07	9447.36	2.08572e+07	0	2.08572e+07	11827.2	2.08461e+07	1.3033e+07	9.33608e+06	0	1.3033e+07	1.95541e+06	2.72519e+06	5.26574e+06	29438.5	5.23998e+06	0	0	0	0	0	0	21100.7	1657.14	1206.74	451.035	1440.16	890.81	552.454	694.426
Max	South Korea	KOR	HIC	Asia	Eastern Asia	NA	OECD Pacific	5.1548e+07	0.0987615	2.5793e+07	2.5793e+07	1.8772e+07	8.77394e+06	4.32393e+06	7.87495e+06	1.69609e+07	1.8772e+07	0	0	2.58455e+07	14907.7	2.58356e+07	0	2.58356e+07	20745.8	2.5823e+07	1.8772e+07	1.6982e+07	0	1.8772e+07	4.32393e+06	7.87495e+06	8.79877e+06	38875.3	8.77394e+06	0	0	0	0	0	0	34174.1	2523	1830.66	696.145	3566.6	2223.38	1343.22	1146.35
Mean	Kuwait	KWT	HIC	Asia	Western Asia	NA	Middle East and North Africa	4.3524e+06	0.0381763	2.4619e+06	2.4619e+06	2.4619e+06	0	0	0	0	0	0	2.4619e+06	2.46575e+06	504.897	2.46524e+06	0	2.46524e+06	967.497	2.46428e+06	2.4619e+06	2370.74	2.4619e+06	0	0	0	2370.74	2370.74	0	1.98785e+06	474051	1.9858e+06	2050.36	0	0	2.46338e+06	88.0988	64.113	23.9858	142.064	87.6022	54.4617	54.5262
Min	Kuwait	KWT	HIC	Asia	Western Asia	NA	Middle East and North Africa	4.3524e+06	0.0381763	492474	492474	492474	0	0	0	0	0	0	492474	494751	43.9262	494632	0	494632	30.7704	494366	492474	686.955	492474	0	0	0	686.955	686.955	0	237793	1654.34	237643	35.4172	0	0	492859	8.03263	5.95083	2.0818	2.86165	1.73791	0.904853	1.47285
Lower quartile	Kuwait	KWT	HIC	Asia	Western Asia	NA	Middle East and North Africa	4.3524e+06	0.0381763	1.55685e+06	1.55685e+06	1.55685e+06	0	0	0	0	0	0	1.55685e+06	1.56119e+06	262.662	1.56091e+06	0	1.56091e+06	420.906	1.56032e+06	1.55685e+06	1538.4	1.55685e+06	0	0	0	1538.4	1538.4	0	1.23282e+06	177609	1.23009e+06	760.381	0	0	1.55825e+06	45.6625	33.3689	12.4101	54.7205	32.8264	19.7812	30.0191
Median	Kuwait	KWT	HIC	Asia	Western Asia	NA	Middle East and North Africa	4.3524e+06	0.0381763	2.19231e+06	2.19231e+06	2.19231e+06	0	0	0	0	0	0	2.19231e+06	2.19487e+06	412.088	2.19443e+06	0	2.19443e+06	734.637	2.19363e+06	2.19231e+06	2363.93	2.19231e+06	0	0	0	2363.93	2363.93	0	1.75405e+06	355793	1.75255e+06	1527.96	0	0	2.1934e+06	71.9004	52.2244	19.5336	100.779	61.3529	37.635	48.5054
Upper quartile	Kuwait	KWT	HIC	Asia	Western Asia	NA	Middle East and North Africa	4.3524e+06	0.0381763	3.30434e+06	3.30434e+06	3.30434e+06	0	0	0	0	0	0	3.30434e+06	3.30871e+06	658.062	3.30804e+06	0	3.30804e+06	1260.23	3.30689e+06	3.30434e+06	3185.66	3.30434e+06	0	0	0	3185.66	3185.66	0	2.63192e+06	642704	2.62929e+06	2767.66	0	0	3.30604e+06	114.749	83.0276	30.9615	183.173	112.599	70.3646	73.6326
Max	Kuwait	KWT	HIC	Asia	Western Asia	NA	Middle East and North Africa	4.3524e+06	0.0381763	5.51254e+06	5.51254e+06	5.51254e+06	0	0	0	0	0	0	5.51254e+06	5.51813e+06	2475.12	5.51701e+06	0	5.51701e+06	8221.52	5.5146e+06	5.51254e+06	4364.93	5.51254e+06	0	0	0	4364.93	4364.93	0	5.20797e+06	3.65714e+06	5.20424e+06	14808.1	0	0	5.51607e+06	418.334	300.927	119.785	1402.04	901.449	783.457	179.231
Mean	Laos	LAO	LMC	Asia	South-eastern Asia	NA	Other non-OECD Asia	7.32642e+06	0.708633	1.66156e+06	583179	583179	0	0	0	0	38824.6	1.07838e+06	544354	1.76355e+06	29628.8	1.73393e+06	1.07838e+06	655543	9995.83	645547	583179	62368.2	544354	38824.6	0	0	62368.2	62368.2	0	440632	103722	440179	453.13	587881	490502	1.66236e+06	5186.05	3774.26	1411.79	999.891	419.271	580.62	18914.4
Min	Laos	LAO	LMC	Asia	South-eastern Asia	NA	Other non-OECD Asia	7.32642e+06	0.708633	986363	300362	300362	0	0	0	0	38824.6	564114	261537	1.06467e+06	15981.4	1.04836e+06	564114	381866	3719.25	376893	300362	22708.8	261537	38824.6	0	0	22708.8	22708.8	0	200161	32491.6	199936	161.087	268000	191130	970170	2744.93	1999.35	745.586	396.915	159.104	219.125	7314.51
Lower quartile	Laos	LAO	LMC	Asia	South-eastern Asia	NA	Other non-OECD Asia	7.32642e+06	0.708633	1.47442e+06	499507	499507	0	0	0	0	38824.6	946262	460682	1.57182e+06	25991.3	1.54476e+06	946262	569861	8277.09	561313	499507	52123.6	460682	38824.6	0	0	52123.6	52123.6	0	371173	80637.8	370774	346.293	495478	410250	1.47071e+06	4541.22	3312.26	1234.29	787.255	322.397	454.413	15281.9
Median	Laos	LAO	LMC	Asia	South-eastern Asia	NA	Other non-OECD Asia	7.32642e+06	0.708633	1.64176e+06	568937	568937	0	0	0	0	38824.6	1.06602e+06	530112	1.74102e+06	29232.9	1.71221e+06	1.06602e+06	642874	9679.47	632509	568937	61183.9	530112	38824.6	0	0	61183.9	61183.9	0	427979	98153.6	427473	427.289	575575	477108	1.64208e+06	5123.42	3726.23	1394.06	943.474	394.623	545.915	18256.7
Upper quartile	Laos	LAO	LMC	Asia	South-eastern Asia	NA	Other non-OECD Asia	7.32642e+06	0.708633	1.83153e+06	652159	652159	0	0	0	0	38824.6	1.19727e+06	613334	1.93677e+06	32860	1.90403e+06	1.19727e+06	727417	11304.8	716229	652159	71193.9	613334	38824.6	0	0	71193.9	71193.9	0	497095	121439	496683	528.069	666881	557933	1.8363e+06	5745.16	4183.3	1565.91	1157.95	490.365	671.451	21780.3
Max	Laos	LAO	LMC	Asia	South-eastern Asia	NA	Other non-OECD Asia	7.32642e+06	0.708633	2.73673e+06	1.12745e+06	1.12745e+06	0	0	0	0	38824.6	1.92428e+06	1.08863e+06	2.84499e+06	51426.2	2.7936e+06	1.92428e+06	1.21133e+06	22413.1	1.18995e+06	1.12745e+06	132180	1.08863e+06	38824.6	0	0	132180	132180	0	952994	318734	952063	1467.28	1.32962e+06	997663	2.76405e+06	9256.05	6742.57	2513.48	3093.13	1273.33	2029.42	46896.5
Mean	Lebanon	LBN	UMC	Asia	Western Asia	NA	Middle East and North Africa	5.64779e+06	0.106121	1.63013e+06	1.55561e+06	1.5029e+06	38578	14130.6	0	52708.5	233357	74514.9	1.26955e+06	1.82413e+06	4869.34	1.81926e+06	74514.9	1.74474e+06	8062.18	1.73668e+06	1.5029e+06	233776	1.26955e+06	233357	14130.6	0	219645	181067	38578	1.02696e+06	242585	1.02591e+06	1053.58	26879.5	47635.4	1.35699e+06	851.771	619.935	231.836	1025.57	455.557	570.012	54914.1
Min	Lebanon	LBN	UMC	Asia	Western Asia	NA	Middle East and North Africa	5.64779e+06	0.106121	1.29638e+06	1.24279e+06	1.186e+06	20009.1	14130.1	0	34139.2	233357	53405.3	952646	1.44656e+06	3731.86	1.44282e+06	53405.3	1.38942e+06	4979.63	1.38347e+06	1.186e+06	130108	952646	233357	14130.1	0	115977	94576.5	20009.1	758901	107605	757930	416.902	16237.9	32953.1	1.02228e+06	645.136	469.222	175.914	560.132	252.056	308.076	24446.6
Lower quartile	Lebanon	LBN	UMC	Asia	Western Asia	NA	Middle East and North Africa	5.64779e+06	0.106121	1.56098e+06	1.4887e+06	1.43613e+06	22151.9	14130.1	0	36285.7	233357	69886.1	1.20277e+06	1.75147e+06	4629.04	1.74674e+06	69886.1	1.67428e+06	7362.54	1.66672e+06	1.43613e+06	207454	1.20277e+06	233357	14130.1	0	193324	159562	22151.9	963905	207869	962927	892.814	24458.3	44171.8	1.28719e+06	808.064	588.057	219.888	918.521	407.324	509.903	47209.1
Median	Lebanon	LBN	UMC	Asia	Western Asia	NA	Middle East and North Africa	5.64779e+06	0.106121	1.62683e+06	1.55234e+06	1.49881e+06	26724.4	14130.1	0	40854.5	233357	74235.2	1.26546e+06	1.82143e+06	4862.52	1.81638e+06	74235.2	1.74191e+06	8014.93	1.73402e+06	1.49881e+06	230895	1.26546e+06	233357	14130.1	0	216765	179363	26724.4	1.02476e+06	238670	1.02365e+06	1034.3	26658.4	47340.5	1.35333e+06	849.782	618.807	231.114	1014.02	449.677	563.33	54081.5
Upper quartile	Lebanon	LBN	UMC	Asia	Western Asia	NA	Middle East and North Africa	5.64779e+06	0.106121	1.69788e+06	1.62069e+06	1.56712e+06	52278.9	14130.1	0	66409	233357	78895	1.33377e+06	1.89354e+06	5096.56	1.88836e+06	78895	1.81205e+06	8700.88	1.80342e+06	1.56712e+06	257854	1.33377e+06	233357	14130.1	0	243724	200940	52278.9	1.08708e+06	273369	1.08619e+06	1194.75	29054.8	50727.6	1.42394e+06	892.08	649.28	242.953	1123.98	500.162	625.186	61749.4
Max	Lebanon	LBN	UMC	Asia	Western Asia	NA	Middle East and North Africa	5.64779e+06	0.106121	2.02379e+06	1.94075e+06	1.90394e+06	128541	14200.1	0	142672	233357	100508	1.67059e+06	2.22783e+06	6333.43	2.22189e+06	100508	2.14581e+06	11527.6	2.13887e+06	1.90394e+06	382126	1.67059e+06	233357	14200.1	0	367996	304728	128541	1.3892e+06	465087	1.38802e+06	2213.69	40343	67695.1	1.77031e+06	1111.73	808.689	303.046	1628.12	722.871	915.36	102765
Mean	Liberia	LBR	LIC	Africa	Sub-Saharan Africa	Western Africa	Other Africa	5.08491e+06	0.413687	870597	281719	281719	0	0	0	0	74945.5	588878	206774	942845	17198.1	925647	588878	336769	4245.82	332523	281719	50804.1	206774	74945.5	0	0	50804.1	50804.1	0	167374	39399.4	167202	171.904	420617	168261	817096	3009.15	2190.55	818.602	426.664	178.047	248.617	15470.1
Min	Liberia	LBR	LIC	Africa	Sub-Saharan Africa	Western Africa	Other Africa	5.08491e+06	0.413687	720719	218854	218854	0	0	0	0	74945.5	471100	143909	788459	13741.9	774461	471100	255233	2220.03	252000	218854	24292.9	143909	74945.5	0	0	24292.9	24292.9	0	108687	18663.9	108570	75.4734	301641	90344.9	665566	2377.43	1724.56	648.936	193.489	66.702	100.544	6228.71
Lower quartile	Liberia	LBR	LIC	Africa	Sub-Saharan Africa	Western Africa	Other Africa	5.08491e+06	0.413687	837216	265078	265078	0	0	0	0	74945.5	562783	190132	906849	16435.6	890099	562783	317444	3656.81	313416	265078	41283.9	190132	74945.5	0	0	41283.9	41283.9	0	152740	33418.5	152590	144.657	393007	143743	782845	2867.11	2087.3	779.281	351.064	142.283	202.133	11971
Median	Liberia	LBR	LIC	Africa	Sub-Saharan Africa	Western Africa	Other Africa	5.08491e+06	0.413687	869609	279830	279830	0	0	0	0	74945.5	587347	204885	941340	17162.6	924279	587347	334873	4177.72	330634	279830	48605.5	204885	74945.5	0	0	48605.5	48605.5	0	165748	38527.7	165560	167.346	420379	167478	816283	3001	2184.39	816.701	417.871	171.748	240.764	14463.2
Upper quartile	Liberia	LBR	LIC	Africa	Sub-Saharan Africa	Western Africa	Other Africa	5.08491e+06	0.413687	903952	296283	296283	0	0	0	0	74945.5	613585	221337	977750	17906.1	960230	613585	353807	4773.72	349302	296283	58670.5	221337	74945.5	0	0	58670.5	58670.5	0	180204	44593.7	179972	193.717	448204	192139	850977	3141.06	2286.11	856.013	492.939	207.348	287.003	18015.8
Max	Liberia	LBR	LIC	Africa	Sub-Saharan Africa	Western Africa	Other Africa	5.08491e+06	0.413687	1.05099e+06	386235	386235	0	0	0	0	74945.5	754181	311290	1.11856e+06	21668.7	1.09712e+06	754181	451177	7781.98	443483	386235	93576.3	311290	74945.5	0	0	93576.3	93576.3	0	260406	79396.9	260044	392.3	572646	267575	1.00063e+06	3857.56	2810.97	1051.46	891.379	427.781	565.055	40892.6
Mean	Libya	LBY	UMC	Africa	Northern Africa	NA	Middle East and North Africa	6.65053e+06	0.252905	1.44907e+06	1.28078e+06	1.27146e+06	608.202	8708.94	0	9317.14	579166	168293	692293	1.64375e+06	6039.72	1.63771e+06	168293	1.46942e+06	10856.7	1.45856e+06	1.27146e+06	187100	692293	579166	8708.94	0	178391	177783	608.202	560322	131971	559746	575.832	54428	113865	877483	1056.82	769.137	287.688	1409.4	625.617	783.788	54031.5
Min	Libya	LBY	UMC	Africa	Northern Africa	NA	Middle East and North Africa	6.65053e+06	0.252905	1.14047e+06	1.01378e+06	1.01171e+06	0	0	0	0	407987	116833	526577	1.30681e+06	4454.26	1.30235e+06	116833	1.177e+06	6018.5	1.16943e+06	1.01171e+06	80636.2	526577	407987	0	0	67950	67843	0	396481	54060.5	396123	248.864	33757	77597.1	684350	771.941	560.152	211.789	665.167	300.646	364.52	19933.8
Lower quartile	Libya	LBY	UMC	Africa	Northern Africa	NA	Middle East and North Africa	6.65053e+06	0.252905	1.3791e+06	1.21776e+06	1.21005e+06	0	1882.1	0	2347.98	536376	155850	654235	1.56729e+06	5748.35	1.56153e+06	155850	1.39963e+06	9722.32	1.38918e+06	1.21005e+06	156262	654235	536376	1882.1	0	149186	148568	0	524581	111814	524048	487.6	48992.6	104878	832485	1003.03	729.782	272.828	1207.61	535.762	672.604	43176
Median	Libya	LBY	UMC	Africa	Northern Africa	NA	Middle East and North Africa	6.65053e+06	0.252905	1.4362e+06	1.26825e+06	1.25931e+06	48.6375	4046.49	0	4687.24	557730	166643	689828	1.63281e+06	6019.04	1.62682e+06	166643	1.45959e+06	10768.3	1.44884e+06	1.25931e+06	182468	689828	557730	4046.49	0	173886	173215	48.6375	558531	129616	557865	564.003	53857.1	112904	874209	1052.9	765.957	286.691	1391.39	617.191	771.41	52010.4
Upper quartile	Libya	LBY	UMC	Africa	Northern Africa	NA	Middle East and North Africa	6.65053e+06	0.252905	1.50714e+06	1.33266e+06	1.32416e+06	438.949	10998.2	0	11734.2	604214	179281	728376	1.71067e+06	6307.4	1.70408e+06	179281	1.53027e+06	11880.1	1.51905e+06	1.32416e+06	213797	728376	604214	10998.2	0	204389	203807	438.949	593754	149733	593124	651.101	59167.7	121828	918805	1106.34	805.35	301.304	1583.08	703.859	882.897	62766.4
Max	Libya	LBY	UMC	Africa	Northern Africa	NA	Middle East and North Africa	6.65053e+06	0.252905	1.83679e+06	1.65444e+06	1.65201e+06	10109.2	93136.4	0	93442.5	814246	253410	929525	2.08152e+06	7893.79	2.07422e+06	253410	1.88239e+06	16973.1	1.87017e+06	1.65201e+06	382823	929525	814246	93136.4	0	377738	377687	10109.2	776104	277141	775416	1179.14	90292.6	184367	1.13445e+06	1374.4	1000.11	374.289	2682.93	1223.41	1476.16	123084
Mean	Saint Lucia	LCA	UMC	Americas	Latin America and the Caribbean	Caribbean	Latin America	179021	0.272633	55571.8	48645.9	48011.8	634.079	0	0	634.079	47639.1	6925.91	372.779	60836.1	303.077	60533	6925.91	53607.1	266.433	53340.7	48011.8	5328.83	372.779	47639.1	0	0	5328.83	4694.75	634.079	301.853	70.9261	301.544	0.308564	2020.69	4905.21	7868.19	53.0568	38.6121	14.4446	44.3884	19.7029	24.6856	1428.7
Min	Saint Lucia	LCA	UMC	Americas	Latin America and the Caribbean	Caribbean	Latin America	179021	0.272633	34138.5	30087.6	29594.4	355.844	0	0	355.844	29459.1	3328.31	64.8373	38622.3	173.036	38420.7	3328.31	34231.2	83.8772	34048.8	29594.4	1915.96	64.8373	29459.1	0	0	1915.96	1335.9	355.844	53.1257	7.89686	53.0493	0.0351342	769.039	2321.97	3848.23	30.4342	22.0234	8.17281	11.2498	4.817	6.43279	346.507
Lower quartile	Saint Lucia	LCA	UMC	Americas	Latin America and the Caribbean	Caribbean	Latin America	179021	0.272633	48668.3	42428.9	41812.6	475.864	0	0	475.864	41515.1	5920.15	278.725	53777	265.786	53493.1	5920.15	47275.7	222.58	47056.3	41812.6	4124.72	278.725	41515.1	0	0	4124.72	3499.55	475.864	223.754	45.608	223.491	0.199898	1659.12	4147.26	6738.71	46.5114	33.8235	12.6489	35.8414	15.762	19.8246	993.842
Median	Saint Lucia	LCA	UMC	Americas	Latin America and the Caribbean	Caribbean	Latin America	179021	0.272633	55059.1	48013.8	47385.9	581.416	0	0	581.416	46982.8	6825.33	356.073	60404.6	300.457	60081	6825.33	53136.9	259.813	52872.6	47385.9	5080.69	356.073	46982.8	0	0	5080.69	4406.69	581.416	287.671	64.2535	287.404	0.278504	1978.13	4827	7754.45	52.4566	38.1594	14.285	43.0427	19.1021	23.997	1314.93
Upper quartile	Saint Lucia	LCA	UMC	Americas	Latin America and the Caribbean	Caribbean	Latin America	179021	0.272633	61630	54056.3	53417.9	738.374	0	0	738.374	53038.6	7884.95	451.068	66986.4	336.131	66661.1	7884.95	59195.3	303.378	58883.3	53417.9	6282.55	451.068	53038.6	0	0	6282.55	5655.27	738.374	364.175	88.6036	363.819	0.386007	2324.88	5589.96	8907.99	58.959	42.9128	16.0649	51.2834	22.9783	28.6071	1739.03
Max	Saint Lucia	LCA	UMC	Americas	Latin America and the Caribbean	Caribbean	Latin America	179021	0.272633	87179.6	76337.4	75748.5	2013.65	0	0	2013.65	74951.3	11783.3	931.693	92758.5	478.282	92308.6	11783.3	81466.3	589.585	81152.8	75748.5	12697.9	931.693	74951.3	0	0	12697.9	11640.3	2013.65	772.92	270.168	771.971	1.1737	3942.35	8869.4	13067.2	83.3269	60.0662	23.6013	102.748	46.2523	60.6606	5088.67
Mean	Liechtenstein	LIE	HIC	Europe	Western Europe	NA	OECD Non-EU countries	38732.9	0.132958	15761.5	15761.5	8348.03	3878.81	2231.73	1302.9	7413.45	8348.03	0	0	15812.4	17.3233	15795.1	0	15795.1	14.5082	15780.6	8348.03	7432.58	0	8348.03	2231.73	1302.9	3897.95	19.138	3878.81	0	0	0	0	0	0	31.8315	3.03226	2.20696	0.8253	1.54968	0.957296	0.59238	0.440779
Min	Liechtenstein	LIE	HIC	Europe	Western Europe	NA	OECD Non-EU countries	38732.9	0.132958	11687.5	11687.5	5065.63	1538.31	935.503	1302.9	4677.09	5065.63	0	0	11725.9	10.3184	11713.7	0	11713.7	6.57177	11704.3	5065.63	4699.53	0	5065.63	935.503	1302.9	1558.32	9.43133	1538.31	0	0	0	0	0	0	18.3158	1.81323	1.32091	0.492325	0.508922	0.329065	0.179858	0.171637
Lower quartile	Liechtenstein	LIE	HIC	Europe	Western Europe	NA	OECD Non-EU countries	38732.9	0.132958	15042.8	15042.8	7563.11	3388.55	1757.11	1302.9	6734.78	7563.11	0	0	15091.6	15.4879	15075.8	0	15075.8	12.2373	15062.8	7563.11	6752.41	0	7563.11	1757.11	1302.9	3407.95	17.2134	3388.55	0	0	0	0	0	0	28.0836	2.71054	1.97196	0.738607	1.25981	0.773852	0.473233	0.376732
Median	Liechtenstein	LIE	HIC	Europe	Western Europe	NA	OECD Non-EU countries	38732.9	0.132958	15785.1	15785.1	8312.29	3868.51	2179.15	1302.9	7370.37	8312.29	0	0	15835.7	17.1549	15817.6	0	15817.6	14.2263	15802.9	8312.29	7389.39	0	8312.29	2179.15	1302.9	3886.7	19.1706	3868.51	0	0	0	0	0	0	31.4649	2.9976	2.1822	0.816755	1.4958	0.924775	0.570776	0.4366
Upper quartile	Liechtenstein	LIE	HIC	Europe	Western Europe	NA	OECD Non-EU countries	38732.9	0.132958	16489.7	16489.7	9121.94	4339.6	2657.06	1302.9	8067.9	9121.94	0	0	16540.2	18.9705	16524.1	0	16524.1	16.4023	16510.1	9121.94	8086.12	0	9121.94	2657.06	1302.9	4359.32	21.0629	4339.6	0	0	0	0	0	0	35.14	3.32156	2.42165	0.902954	1.78869	1.10418	0.683808	0.499936
Max	Liechtenstein	LIE	HIC	Europe	Western Europe	NA	OECD Non-EU countries	38732.9	0.132958	19760.9	19760.9	13279.4	6576.71	4769.91	1302.9	11527	13279.4	0	0	19812.1	28.8939	19792.5	0	19792.5	33.1552	19779.5	13279.4	11548.1	0	13279.4	4769.91	1302.9	6598.67	27.6267	6576.71	0	0	0	0	0	0	59.5025	5.00737	3.63011	1.37726	3.79382	2.28341	1.57713	0.831395
Mean	Sri Lanka	LKA	LMC	Asia	Southern Asia	NA	Other non-OECD Asia	2.16769e+07	0.161747	7.05133e+06	5.52732e+06	5.44353e+06	0	83795.2	0	83795.2	21443.3	1.524e+06	5.42208e+06	7.6916e+06	55690.4	7.63591e+06	1.524e+06	6.11191e+06	52746.5	6.05916e+06	5.44353e+06	615636	5.42208e+06	21443.3	83795.2	0	531841	531841	0	4.38568e+06	1.0364e+06	4.38118e+06	4500.56	861054	662949	7.05452e+06	9745.94	7093.77	2652.17	5206.83	2176.39	3030.44	161627
Min	Sri Lanka	LKA	LMC	Asia	Southern Asia	NA	Other non-OECD Asia	2.16769e+07	0.161747	6.5139e+06	4.96986e+06	4.89495e+06	0	53341.5	0	53341.5	21443.3	1.25119e+06	4.8735e+06	7.14542e+06	50583.3	7.09302e+06	1.25119e+06	5.56301e+06	45405.5	5.51253e+06	4.89495e+06	508658	4.8735e+06	21443.3	53341.5	0	434031	434031	0	3.89483e+06	827846	3.89112e+06	3597.42	691588	519165	6.52624e+06	8843.82	6439.91	2403.91	4293.85	1760.16	2472.2	125472
Lower quartile	Sri Lanka	LKA	LMC	Asia	Southern Asia	NA	Other non-OECD Asia	2.16769e+07	0.161747	6.94325e+06	5.42724e+06	5.3446e+06	0	76695.4	0	76695.4	21443.3	1.47307e+06	5.32316e+06	7.57931e+06	54741.8	7.52405e+06	1.47307e+06	6.00985e+06	51263.7	5.95772e+06	5.3446e+06	594847	5.32316e+06	21443.3	76695.4	0	512540	512540	0	4.29618e+06	990710	4.29179e+06	4300.07	826470	633014	6.94473e+06	9579.18	6972.61	2605.55	5010.57	2088.12	2911.41	154539
Median	Sri Lanka	LKA	LMC	Asia	Southern Asia	NA	Other non-OECD Asia	2.16769e+07	0.161747	7.05269e+06	5.52528e+06	5.44142e+06	0	83376.4	0	83376.4	21443.3	1.52222e+06	5.41997e+06	7.69306e+06	55700.8	7.63703e+06	1.52222e+06	6.10993e+06	52705.5	6.05729e+06	5.44142e+06	615482	5.41997e+06	21443.3	83376.4	0	531446	531446	0	4.38353e+06	1.03432e+06	4.37889e+06	4491.43	860038	662399	7.05693e+06	9742.91	7091.79	2652.08	5196.17	2169.93	3025.27	161411
Upper quartile	Sri Lanka	LKA	LMC	Asia	Southern Asia	NA	Other non-OECD Asia	2.16769e+07	0.161747	7.16106e+06	5.62548e+06	5.54115e+06	0	90449.9	0	90449.9	21443.3	1.57516e+06	5.5197e+06	7.80222e+06	56639.3	7.74627e+06	1.57516e+06	6.21222e+06	54213.8	6.15895e+06	5.54115e+06	635532	5.5197e+06	21443.3	90449.9	0	550787	550787	0	4.47262e+06	1.08047e+06	4.46809e+06	4691.15	895655	691711	7.16464e+06	9915.17	7215.46	2699.16	5399.12	2263.01	3143.62	168296
Max	Sri Lanka	LKA	LMC	Asia	Southern Asia	NA	Other non-OECD Asia	2.16769e+07	0.161747	7.67622e+06	6.11348e+06	6.02111e+06	0	119214	0	119214	21443.3	1.81535e+06	5.99967e+06	8.32191e+06	60337.1	8.26194e+06	1.81535e+06	6.69195e+06	60693.4	6.63125e+06	6.02111e+06	745292	5.99967e+06	21443.3	119214	0	667226	667226	0	4.90023e+06	1.28257e+06	4.89515e+06	5782.77	1.11227e+06	838736	7.69032e+06	10582.6	7711.92	2879.65	6382.53	2726.67	3703.55	202135
Mean	Lesotho	LSO	LMC	Africa	Sub-Saharan Africa	Southern Africa	Other Africa	2.25664e+06	0.619419	589612	148984	148984	0	0	0	0	0	440628	148984	627279	10676.4	616602	440628	175975	1709.42	174265	148984	25281.4	148984	0	0	0	25281.4	25281.4	0	120366	28617.7	120242	123.812	243476	197151	601997	1869.16	1360.47	508.691	151.309	63.2375	88.0711	7690.87
Min	Lesotho	LSO	LMC	Africa	Sub-Saharan Africa	Southern Africa	Other Africa	2.25664e+06	0.619419	227809	66245.9	66245.9	0	0	0	0	0	161563	66245.9	258145	4308.72	253836	161563	82822.5	687.945	82075.8	66245.9	7911.71	66245.9	0	0	0	7911.71	7911.71	0	46945.4	6371.07	46901.4	26.3682	87063.8	37402	232868	771.445	558.618	212.827	41.3072	15.5035	21.5654	2237.04
Lower quartile	Lesotho	LSO	LMC	Africa	Sub-Saharan Africa	Southern Africa	Other Africa	2.25664e+06	0.619419	508322	124146	124146	0	0	0	0	0	378731	124146	545146	9284.8	535717	378731	150933	1378.7	149436	124146	19431.2	124146	0	0	0	19431.2	19431.2	0	99230.2	20328.9	99129	88.4215	197210	155314	519422	1627.54	1184.78	442.721	108.604	44.3909	62.3934	5597.27
Median	Lesotho	LSO	LMC	Africa	Sub-Saharan Africa	Southern Africa	Other Africa	2.25664e+06	0.619419	586151	146725	146725	0	0	0	0	0	438224	146725	624131	10600.3	613650	438224	174083	1648.14	172367	146725	24302.2	146725	0	0	0	24302.2	24302.2	0	118127	26596.4	118005	115.327	236782	190751	598460	1853.81	1349.66	503.835	139.737	57.8641	81.1414	7214.66
Upper quartile	Lesotho	LSO	LMC	Africa	Sub-Saharan Africa	Southern Africa	Other Africa	2.25664e+06	0.619419	664561	170838	170838	0	0	0	0	0	496475	170838	703487	11931.1	691934	496475	198876	1991.14	196976	170838	30067.7	170838	0	0	0	30067.7	30067.7	0	139063	35161.8	138901	149.623	283382	234280	678614	2088.92	1520.95	569.153	182.253	76.2604	104.857	9284.07
Max	Lesotho	LSO	LMC	Africa	Sub-Saharan Africa	Southern Africa	Other Africa	2.25664e+06	0.619419	1.03787e+06	291943	291943	0	0	0	0	0	811932	291943	1.09165e+06	20352.8	1.07129e+06	811932	310380	4027.08	307292	291943	59178.8	291943	0	0	0	59178.8	59178.8	0	237150	116542	236960	459.266	540616	439270	1.06047e+06	3668.97	2663.96	1005.01	582.158	242.003	364.195	25568.5
Mean	Lithuania	LTU	HIC	Europe	Northern Europe	NA	OECD EU countries	2.81962e+06	0.420126	1.51014e+06	1.49786e+06	1.17695e+06	320914	0	0	320914	1.17695e+06	12280.5	0	1.51401e+06	1405.04	1.51261e+06	12280.5	1.50033e+06	1532.21	1.4988e+06	1.17695e+06	321848	0	1.17695e+06	0	0	321848	934.145	320914	0	0	0	0	8105.76	4174.7	15217.7	245.926	179.006	66.9199	182.241	112.48	69.7605	21.4977
Min	Lithuania	LTU	HIC	Europe	Northern Europe	NA	OECD EU countries	2.81962e+06	0.420126	1.31027e+06	1.29821e+06	1.00681e+06	239715	0	0	239715	1.00681e+06	8079.44	0	1.31378e+06	1030.45	1.31255e+06	8079.44	1.30049e+06	984.494	1.29907e+06	1.00681e+06	240583	0	1.00681e+06	0	0	240583	504.893	239715	0	0	0	0	3414.7	367.563	10514.3	175.506	128.2	47.3056	106.871	66.5501	40.3207	9.20621
Lower quartile	Lithuania	LTU	HIC	Europe	Northern Europe	NA	OECD EU countries	2.81962e+06	0.420126	1.47044e+06	1.45848e+06	1.13997e+06	302501	0	0	302501	1.13997e+06	11052.8	0	1.47412e+06	1327.02	1.47279e+06	11052.8	1.46099e+06	1396.19	1.45944e+06	1.13997e+06	303409	0	1.13997e+06	0	0	303409	813.647	302501	0	0	0	0	6731.88	2944.39	13971.5	232.026	168.833	63.1258	164.664	101.299	62.4512	17.6626
Median	Lithuania	LTU	HIC	Europe	Northern Europe	NA	OECD EU countries	2.81962e+06	0.420126	1.50946e+06	1.49682e+06	1.17661e+06	320190	0	0	320190	1.17661e+06	12155.4	0	1.51337e+06	1399.76	1.51191e+06	12155.4	1.49937e+06	1523.39	1.49783e+06	1.17661e+06	321112	0	1.17661e+06	0	0	321112	931.37	320190	0	0	0	0	8101.79	4167.45	15063.6	245.015	178.375	66.6918	180.527	111.281	69.0757	20.9845
Upper quartile	Lithuania	LTU	HIC	Europe	Northern Europe	NA	OECD EU countries	2.81962e+06	0.420126	1.54825e+06	1.5361e+06	1.21209e+06	337695	0	0	337695	1.21209e+06	13376.7	0	1.55217e+06	1478.23	1.55067e+06	13376.7	1.53866e+06	1653.44	1.53699e+06	1.21209e+06	338634	0	1.21209e+06	0	0	338634	1053.4	337695	0	0	0	0	9393.52	5383.19	16346.2	258.765	188.392	70.4911	198.542	122.709	76.1281	24.7739
Max	Lithuania	LTU	HIC	Europe	Northern Europe	NA	OECD EU countries	2.81962e+06	0.420126	1.71765e+06	1.70274e+06	1.41536e+06	443591	0	0	443591	1.41536e+06	19984.9	0	1.72207e+06	1813.54	1.72037e+06	19984.9	1.70546e+06	2401.52	1.70362e+06	1.41536e+06	444382	0	1.41536e+06	0	0	444382	1444.24	443591	0	0	0	0	14935.2	9090.7	23138.2	324.292	236.616	87.6751	288.945	176.687	114.687	42.4363
Mean	Luxembourg	LUX	HIC	Europe	Western Europe	NA	OECD EU countries	629152	0.303644	298466	298466	126842	67084.3	20989.9	83549.2	171623	126842	0	0	299186	273.667	298913	0	298913	196.812	298716	126842	171873	0	126842	20989.9	83549.2	67334.3	249.978	67084.3	0	0	0	0	0	0	470.479	47.8985	34.8641	13.0344	22.3052	13.7631	8.54207	5.75926
Min	Luxembourg	LUX	HIC	Europe	Western Europe	NA	OECD EU countries	629152	0.303644	238287	238287	69361.9	40438.2	7259.97	39700.6	102676	69361.9	0	0	238924	218.343	238696	0	238696	146.323	238513	69361.9	102894	0	69361.9	7259.97	39700.6	40656.7	164.222	40438.2	0	0	0	0	0	0	371.402	38.0969	27.6864	10.3188	15.3392	9.35578	5.9127	3.19994
Lower quartile	Luxembourg	LUX	HIC	Europe	Western Europe	NA	OECD EU countries	629152	0.303644	284430	284430	109703	59257.2	17149.5	67874.3	154390	109703	0	0	285136	259.423	284872	0	284872	184.532	284673	109703	154632	0	109703	17149.5	67874.3	59522.2	223.314	59257.2	0	0	0	0	0	0	445.522	45.385	33.0312	12.3538	20.5776	12.6795	7.86063	4.97099
Median	Luxembourg	LUX	HIC	Europe	Western Europe	NA	OECD EU countries	629152	0.303644	297536	297536	125037	66025.3	20399.9	81147	169644	125037	0	0	298247	272.443	297975	0	297975	195.543	297780	125037	169879	0	125037	20399.9	81147	66270.3	250.324	66025.3	0	0	0	0	0	0	468.657	47.6972	34.7124	12.982	22.1034	13.6142	8.47118	5.63551
Upper quartile	Luxembourg	LUX	HIC	Europe	Western Europe	NA	OECD EU countries	629152	0.303644	311559	311559	142369	73594.1	24215.5	97530.2	187165	142369	0	0	312296	286.223	312006	0	312006	207.685	311801	142369	187419	0	142369	24215.5	97530.2	73835.4	275.45	73594.1	0	0	0	0	0	0	492.022	50.1543	36.4967	13.6536	23.7756	14.6685	9.13334	6.44661
Max	Luxembourg	LUX	HIC	Europe	Western Europe	NA	OECD EU countries	629152	0.303644	385419	385419	209686	109791	46268.7	167405	271958	209686	0	0	386204	369.076	385895	0	385895	282.195	385657	209686	272216	0	209686	46268.7	167405	110044	343.249	109791	0	0	0	0	0	0	645.873	64.734	47.2954	17.4386	35.6606	22.1584	14.6356	10.2709
Mean	Latvia	LVA	HIC	Europe	Northern Europe	NA	OECD EU countries	1.89641e+06	0.431048	1.06008e+06	1.05468e+06	915134	139544	0	0	139544	915134	5399.41	0	1.06283e+06	998.8	1.06183e+06	5399.41	1.05643e+06	1144.72	1.05529e+06	915134	140154	0	915134	0	0	140154	609.29	139544	0	0	0	0	3568.94	1830.47	7542.93	174.836	127.253	47.5831	132.219	81.3978	50.8217	14.0319
Min	Latvia	LVA	HIC	Europe	Northern Europe	NA	OECD EU countries	1.89641e+06	0.431048	867931	866094	649015	36971.3	0	0	36971.3	649015	0	0	870352	672.273	869576	0	867739	643.152	866728	649015	37792.9	0	649015	0	0	37792.9	274.111	36971.3	0	0	0	0	0	0	1758.4	120.83	87.6948	33.1352	65.0072	38.6206	24.8383	4.0638
Lower quartile	Latvia	LVA	HIC	Europe	Northern Europe	NA	OECD EU countries	1.89641e+06	0.431048	1.02101e+06	1.01521e+06	866149	98192.9	0	0	98192.9	866149	2525.36	0	1.02363e+06	924.187	1.02264e+06	2525.36	1.01698e+06	1013.22	1.01577e+06	866149	98867	0	866149	0	0	98867	469.957	98192.9	0	0	0	0	1647.9	788.225	4607.69	161.4	117.496	43.9184	113.289	69.5491	43.0862	9.93457
Median	Latvia	LVA	HIC	Europe	Northern Europe	NA	OECD EU countries	1.89641e+06	0.431048	1.05876e+06	1.05364e+06	917765	125708	0	0	125708	917765	3830.65	0	1.06149e+06	993.133	1.06054e+06	3830.65	1.05544e+06	1129.7	1.05417e+06	917765	126232	0	917765	0	0	126232	607.475	125708	0	0	0	0	2524.66	1269.09	5972.5	173.621	126.397	47.2672	128.603	79.1962	49.2159	13.2393
Upper quartile	Latvia	LVA	HIC	Europe	Northern Europe	NA	OECD EU countries	1.89641e+06	0.431048	1.09758e+06	1.09237e+06	966545	178634	0	0	178634	966545	8563.84	0	1.10038e+06	1069.13	1.09931e+06	8563.84	1.09415e+06	1259.19	1.093e+06	966545	179170	0	966545	0	0	179170	744.519	178634	0	0	0	0	4850.88	2250.57	10683.2	186.993	136.177	50.981	147.361	90.911	57.1211	17.4102
Max	Latvia	LVA	HIC	Europe	Northern Europe	NA	OECD EU countries	1.89641e+06	0.431048	1.26043e+06	1.25784e+06	1.12656e+06	335204	0	0	335204	1.12656e+06	25242.2	0	1.26375e+06	1414.03	1.26252e+06	25242.2	1.25992e+06	1972.14	1.25843e+06	1.12656e+06	335651	0	1.12656e+06	0	0	335651	975.889	335204	0	0	0	0	21397.1	11401.4	26943.1	247.812	181.601	66.7581	295.881	191.737	122.842	34.3161
Mean	Macao	MAC	HIC	Asia	Eastern Asia	NA	Other non-OECD Asia	663213	0.00121227	496249	496249	98982.1	2977.45	11340.6	382949	397267	98982.1	0	0	496767	69.4944	496698	0	496698	74.9041	496623	98982.1	397641	0	98982.1	11340.6	382949	3351.05	373.605	2977.45	0	0	0	0	0	0	144.398	12.1623	8.85141	3.31093	9.46486	5.83175	3.63311	8.57002
Min	Macao	MAC	HIC	Asia	Eastern Asia	NA	Other non-OECD Asia	663213	0.00121227	496249	496249	0	2956.5	0	380256	385933	0	0	0	496375	2.14628	496366	0	496366	1.43569	496357	0	386041	0	0	0	380256	3085.21	107.71	2956.5	0	0	0	0	0	0	3.88576	0.324053	0.238066	0.0859871	0.0430708	0.0288149	0.014256	0.223191
Lower quartile	Macao	MAC	HIC	Asia	Eastern Asia	NA	Other non-OECD Asia	663213	0.00121227	496249	496249	104808	2977.5	0	382956	385933	104808	0	0	496629	32.4834	496570	0	496570	28.2726	496495	104808	386260	0	104808	0	382956	3223.48	245.98	2977.5	0	0	0	0	0	0	65.566	5.69599	4.13657	1.55302	3.08456	1.85861	1.10903	4.78049
Median	Macao	MAC	HIC	Asia	Eastern Asia	NA	Other non-OECD Asia	663213	0.00121227	496249	496249	110316	2977.5	0	382956	385933	110316	0	0	496766	60.009	496697	0	496697	56.7158	496619	110316	386463	0	110316	0	382956	3347.2	369.707	2977.5	0	0	0	0	0	0	120.828	10.4387	7.6224	2.84378	6.61315	3.99824	2.48141	7.65541
Upper quartile	Macao	MAC	HIC	Asia	Eastern Asia	NA	Other non-OECD Asia	663213	0.00121227	496249	496249	110316	2977.5	5508.37	382956	391441	110316	0	0	496893	97.6676	496822	0	496822	102.043	496748	110316	391730	0	110316	5508.37	382956	3476.29	498.793	2977.5	0	0	0	0	0	0	200.492	17.1812	12.4937	4.66585	12.4817	7.7633	4.75545	11.6437
Max	Macao	MAC	HIC	Asia	Eastern Asia	NA	Other non-OECD Asia	663213	0.00121227	496249	496249	110316	2977.5	113037	382956	496249	110316	0	0	497558	239.174	497326	0	497326	517.606	496940	110316	496890	0	110316	113037	382956	3667.79	690.294	2977.5	0	0	0	0	0	0	749.936	45.9317	34.1677	12.6573	69.5736	51.0384	31.6431	28.1337
Mean	Saint-Martin	MAF	HIC	Americas	Latin America and the Caribbean	Caribbean	OECD EU countries	32352.4	0.0722155	12860.3	12400.7	12308	92.7096	0	0	92.7096	12308	459.593	0	12901.9	9.62002	12892.3	459.593	12432.7	14.8378	12417.9	12308	109.915	0	12308	0	0	109.915	17.2054	92.7096	0	0	0	0	301.952	157.64	484.051	1.68237	1.22481	0.457567	1.86953	1.15703	0.712505	0.394068
Min	Saint-Martin	MAF	HIC	Americas	Latin America and the Caribbean	Caribbean	OECD EU countries	32352.4	0.0722155	3896.84	3857.87	3857.87	0	0	0	0	3857.87	0	0	3911.75	1.87125	3908.2	0	3869.24	1.15299	3862.98	3857.87	5.02433	0	3857.87	0	0	5.02433	5.02433	0	0	0	0	0	0	0	4.2442	0.325842	0.237597	0.0849523	0.0764769	0.0435327	0.0289261	0.0111609
Lower quartile	Saint-Martin	MAF	HIC	Americas	Latin America and the Caribbean	Caribbean	OECD EU countries	32352.4	0.0722155	10037.3	9683.06	9600.47	0	0	0	0	9600.47	0	0	10072.8	6.55155	10064	0	9700.92	8.1672	9689.85	9600.47	15.4945	0	9600.47	0	0	15.4945	11.2963	0	0	0	0	0	0	0	22.9985	1.14193	0.82786	0.309854	0.89259	0.537773	0.322133	0.216524
Median	Saint-Martin	MAF	HIC	Americas	Latin America and the Caribbean	Caribbean	OECD EU countries	32352.4	0.0722155	12162.9	11743.7	11688.2	0	0	0	0	11688.2	172.406	0	12220.7	8.7606	12206.8	172.406	11778.8	12.5157	11765.7	11688.2	25.4624	0	11688.2	0	0	25.4624	17.1236	0	0	0	0	0	95.4517	24.8448	189.469	1.53398	1.11149	0.416775	1.48483	0.910994	0.558003	0.353477
Upper quartile	Saint-Martin	MAF	HIC	Americas	Latin America and the Caribbean	Caribbean	OECD EU countries	32352.4	0.0722155	15115	14642.7	14551.8	101.811	0	0	101.811	14551.8	657.362	0	15175.8	11.9325	15162.2	657.362	14688.3	18.747	14669.1	14551.8	121.586	0	14551.8	0	0	121.586	23.0276	101.811	0	0	0	0	393.49	168.033	673.855	2.08461	1.51761	0.56856	2.43408	1.48435	0.940964	0.532152
Max	Saint-Martin	MAF	HIC	Americas	Latin America and the Caribbean	Caribbean	OECD EU countries	32352.4	0.0722155	24561.9	24561.9	24561.9	1110.01	0	0	1110.01	24561.9	4321.95	0	24605.8	30.4236	24591	4321.95	24591	83.1893	24570.8	24561.9	1124.21	0	24561.9	0	0	1124.21	31.1677	1110.01	0	0	0	0	4111.92	2363.87	4344.19	5.49562	3.87212	1.66229	10.8108	8.98117	4.77181	1.21093
Mean	Morocco	MAR	LMC	Africa	Northern Africa	NA	Middle East and North Africa	3.66693e+07	0.221266	1.09044e+07	9.3748e+06	9.37007e+06	0	4724.64	0	4724.64	223497	1.52959e+06	9.14658e+06	1.18618e+07	54833.8	1.1807e+07	1.52959e+06	1.02774e+07	66515.6	1.02109e+07	9.37007e+06	840815	9.14658e+06	223497	4724.64	0	836090	836090	0	7.40353e+06	1.74304e+06	7.39595e+06	7582.67	857166	672426	1.07975e+07	9596.04	6984.47	2611.57	7242.12	3030.18	4211.94	253895
Min	Morocco	MAR	LMC	Africa	Northern Africa	NA	Middle East and North Africa	3.66693e+07	0.221266	9.63921e+06	8.43254e+06	8.43254e+06	0	0	0	0	218513	1.20628e+06	8.20858e+06	1.05271e+07	45264.7	1.04808e+07	1.20628e+06	9.19386e+06	45053.1	9.13711e+06	8.43254e+06	473430	8.20858e+06	218513	0	0	473430	473430	0	6.15965e+06	794740	6.15283e+06	3960.05	588666	437004	9.52372e+06	7883.61	5725.61	2137.89	4473.1	1813.14	2659.96	137314
Lower quartile	Morocco	MAR	LMC	Africa	Northern Africa	NA	Middle East and North Africa	3.66693e+07	0.221266	1.06755e+07	9.18992e+06	9.1852e+06	0	0	0	0	223955	1.45591e+06	8.96223e+06	1.16167e+07	53013.5	1.15632e+07	1.45591e+06	1.0072e+07	62318.4	1.00058e+07	9.1852e+06	758425	8.96223e+06	223955	0	0	753499	753499	0	7.15999e+06	1.53367e+06	7.15286e+06	6654.05	795512	618534	1.05652e+07	9268.46	6745.91	2520.7	6624.45	2743.34	3831.26	224247
Median	Morocco	MAR	LMC	Africa	Northern Africa	NA	Middle East and North Africa	3.66693e+07	0.221266	1.09015e+07	9.3686e+06	9.36449e+06	0	201.56	0	201.56	223955	1.52701e+06	9.14066e+06	1.18589e+07	54766.8	1.18034e+07	1.52701e+06	1.02737e+07	66237.5	1.02071e+07	9.36449e+06	830956	9.14066e+06	223955	201.56	0	825518	825518	0	7.42522e+06	1.71538e+06	7.41746e+06	7454.59	854007	669284	1.07939e+07	9584.68	6974.45	2607.92	7176.38	2994.59	4161.54	249467
Upper quartile	Morocco	MAR	LMC	Africa	Northern Africa	NA	Middle East and North Africa	3.66693e+07	0.221266	1.11311e+07	9.55935e+06	9.55495e+06	0	3584.76	0	3584.76	223955	1.60007e+06	9.33166e+06	1.21097e+07	56603.2	1.20532e+07	1.60007e+06	1.04815e+07	70599.7	1.04128e+07	9.55495e+06	913763	9.33166e+06	223955	3584.76	0	907919	907919	0	7.65768e+06	1.92674e+06	7.65069e+06	8394.04	913409	723787	1.10267e+07	9914.58	7218.41	2699.22	7798.16	3277.62	4550.61	277696
Max	Morocco	MAR	LMC	Africa	Northern Africa	NA	Middle East and North Africa	3.66693e+07	0.221266	1.21904e+07	1.03716e+07	1.03716e+07	0	50941.7	0	50941.7	223955	1.9403e+06	1.01477e+07	1.3138e+07	65437.4	1.30755e+07	1.9403e+06	1.13221e+07	96009.5	1.12491e+07	1.03716e+07	1.29402e+06	1.01477e+07	223955	50941.7	0	1.28919e+06	1.28919e+06	0	8.62225e+06	2.95863e+06	8.61323e+06	12383.5	1.27563e+06	1.02074e+06	1.20863e+07	11548.1	8368.31	3179.74	11429.9	5084.78	7040.6	451636
Mean	Monaco	MCO	HIC	Europe	Western Europe	NA	Other Eurasia	36834.5	0	29847	29847	0	3019.92	0	26827.1	29847	0	0	0	29882.6	7.69622	29874.9	0	29874.9	6.92317	29868	0	29868	0	0	0	26827.1	3040.85	20.9365	3019.92	0	0	0	0	0	0	14.6194	1.34645	0.980009	0.366437	0.883902	0.546228	0.337674	0.479749
Min	Monaco	MCO	HIC	Europe	Western Europe	NA	Other Eurasia	36834.5	0	29847	29847	0	3019.92	0	26827.1	29847	0	0	0	29854.7	0.0039566	29854.3	0	29854.3	0.0044133	29853.2	0	29853.2	0	0	0	26827.1	3026.11	6.19819	3019.92	0	0	0	0	0	0	0.0083699	0.000686971	0.000488075	0.000198896	0.000865447	0.000534835	0.000310418	0.0187577
Lower quartile	Monaco	MCO	HIC	Europe	Western Europe	NA	Other Eurasia	36834.5	0	29847	29847	0	3019.92	0	26827.1	29847	0	0	0	29872.5	3.47229	29866.8	0	29866.8	2.47069	29860.7	0	29860.7	0	0	0	26827.1	3033.63	13.7164	3019.92	0	0	0	0	0	0	6.29419	0.604609	0.437974	0.16451	0.276372	0.169051	0.101549	0.266606
Median	Monaco	MCO	HIC	Europe	Western Europe	NA	Other Eurasia	36834.5	0	29847	29847	0	3019.92	0	26827.1	29847	0	0	0	29881.6	6.72578	29874.7	0	29874.7	5.25682	29867.7	0	29867.7	0	0	0	26827.1	3040.62	20.7096	3019.92	0	0	0	0	0	0	12.1765	1.16371	0.846994	0.316725	0.610163	0.371868	0.226301	0.424656
Upper quartile	Monaco	MCO	HIC	Europe	Western Europe	NA	Other Eurasia	36834.5	0	29847	29847	0	3019.92	0	26827.1	29847	0	0	0	29891	11.0383	29882.1	0	29882.1	9.55377	29875.3	0	29875.3	0	0	0	26827.1	3048.19	28.2783	3019.92	0	0	0	0	0	0	20.6827	1.91301	1.39594	0.522219	1.20959	0.746419	0.44858	0.647411
Max	Monaco	MCO	HIC	Europe	Western Europe	NA	Other Eurasia	36834.5	0	29847	29847	0	3019.92	0	26827.1	29847	0	0	0	29942.9	28.5077	29917.7	0	29917.7	45.2132	29885.1	0	29885.1	0	0	0	26827.1	3058.01	38.0985	3019.92	0	0	0	0	0	0	73.4491	5.58231	4.0542	1.52811	7.09175	5.03127	3.40748	1.61116
Mean	Moldova	MDA	LMC	Europe	Eastern Europe	NA	Other Eurasia	3.08984e+06	0.462476	729762	584063	584063	0	0	0	0	392954	145699	191109	790220	5987.8	784232	145699	638534	6002.78	632531	584063	48467.8	191109	392954	0	0	48467.8	48467.8	0	154589	36519.9	154430	158.414	80387.3	65311.4	348798	1047.98	762.795	285.188	466.614	195.105	271.508	14754.2
Min	Moldova	MDA	LMC	Europe	Eastern Europe	NA	Other Eurasia	3.08984e+06	0.462476	596292	486849	486849	0	0	0	0	335151	109443	144079	648300	4848.54	643363	109443	533921	3764.95	528931	486849	20978.2	144079	335151	0	0	20978.2	20978.2	0	115228	18886.2	115128	89.8324	53812.6	40271.5	263449	836.569	606.653	227.771	262.2	108.369	144.703	5666.62
Lower quartile	Moldova	MDA	LMC	Europe	Eastern Europe	NA	Other Eurasia	3.08984e+06	0.462476	705187	565678	565678	0	0	0	0	381296	138833	182978	764202	5758.68	758518	138833	617803	5399.48	612001	565678	39383.1	182978	381296	0	0	39383.1	39383.1	0	147227	32596	147075	140.781	74198.2	59456.3	333799	1007.25	733.183	273.906	413.842	170.905	239.387	11562
Median	Moldova	MDA	LMC	Europe	Eastern Europe	NA	Other Eurasia	3.08984e+06	0.462476	729755	584087	584087	0	0	0	0	393113	145577	191217	790275	5985.94	784328	145577	638319	5942.38	632099	584087	46525	191217	393113	0	0	46525	46525	0	154344	36165	154204	156.895	79949	64923.5	348909	1046.98	762.065	284.965	461.182	191.309	267.894	13858.5
Upper quartile	Moldova	MDA	LMC	Europe	Eastern Europe	NA	Other Eurasia	3.08984e+06	0.462476	753490	602298	602298	0	0	0	0	404834	152462	198757	815429	6207.69	809265	152462	658446	6572.94	652191	602298	55730.6	198757	404834	0	0	55730.6	55730.6	0	161799	40078.2	161607	173.81	86057.1	70845	362974	1088.53	791.802	296.284	513.012	216.267	300.205	17104.6
Max	Moldova	MDA	LMC	Europe	Eastern Europe	NA	Other Eurasia	3.08984e+06	0.462476	864795	688207	688207	0	0	0	0	451963	182277	236245	947843	7335.98	940507	182277	758230	9897.91	751010	688207	102433	236245	451963	0	0	102433	102433	0	198265	63166.9	198092	261.724	118885	108130	432369	1273.31	929.457	346.102	840.14	364.191	489.588	39079.2
Mean	Madagascar	MDG	LIC	Africa	Sub-Saharan Africa	Eastern Africa	Other Africa	2.82111e+07	0.576321	3.39375e+06	1.67204e+06	1.61633e+06	0	55705.9	0	55705.9	0	1.72171e+06	1.61633e+06	3.68467e+06	57656.9	3.62702e+06	1.72171e+06	1.90531e+06	29693.4	1.87561e+06	1.61633e+06	259282	1.61633e+06	0	55705.9	0	203576	203576	0	1.30754e+06	308790	1.3062e+06	1344.4	1.328e+06	393712	3.42539e+06	10088.4	7342.44	2745.93	2646.83	1104.85	1541.98	61945.9
Min	Madagascar	MDG	LIC	Africa	Sub-Saharan Africa	Eastern Africa	Other Africa	2.82111e+07	0.576321	2.8851e+06	1.38652e+06	1.33081e+06	0	55705.9	0	55705.9	0	1.39266e+06	1.33081e+06	3.14864e+06	48196.3	3.09751e+06	1.39266e+06	1.58905e+06	16898.4	1.56241e+06	1.33081e+06	177079	1.33081e+06	0	55705.9	0	121373	121373	0	843730	146438	842893	584.923	1.05042e+06	296430	2.90438e+06	8289.04	6038.27	2250.77	1301.5	499.805	773.865	31366.2
Lower quartile	Madagascar	MDG	LIC	Africa	Sub-Saharan Africa	Eastern Africa	Other Africa	2.82111e+07	0.576321	3.29402e+06	1.61303e+06	1.55732e+06	0	55705.9	0	55705.9	0	1.64675e+06	1.55732e+06	3.58344e+06	55261	3.52705e+06	1.64675e+06	1.8408e+06	25833.8	1.81292e+06	1.55732e+06	228857	1.55732e+06	0	55705.9	0	173151	173151	0	1.23763e+06	245172	1.23635e+06	1056.47	1.26733e+06	370882	3.32347e+06	9665.27	7036.21	2631.18	2225.17	908.251	1279.94	50848.9
Median	Madagascar	MDG	LIC	Africa	Sub-Saharan Africa	Eastern Africa	Other Africa	2.82111e+07	0.576321	3.39321e+06	1.66938e+06	1.61367e+06	0	55705.9	0	55705.9	0	1.7198e+06	1.61367e+06	3.68185e+06	57518.2	3.62414e+06	1.7198e+06	1.9031e+06	29229.3	1.87354e+06	1.61367e+06	252996	1.61367e+06	0	55705.9	0	197290	197290	0	1.31244e+06	295440	1.31122e+06	1274.64	1.32679e+06	392909	3.4249e+06	10070.3	7324.88	2740.8	2593.65	1066.2	1490.51	58506.8
Upper quartile	Madagascar	MDG	LIC	Africa	Sub-Saharan Africa	Eastern Africa	Other Africa	2.82111e+07	0.576321	3.48566e+06	1.72736e+06	1.67166e+06	0	55705.9	0	55705.9	0	1.79384e+06	1.67166e+06	3.78219e+06	59903.5	3.72359e+06	1.79384e+06	1.96572e+06	33040.6	1.93554e+06	1.67166e+06	283743	1.67166e+06	0	55705.9	0	228038	228038	0	1.38343e+06	360955	1.38184e+06	1561.31	1.38365e+06	415728	3.52052e+06	10487.8	7636.24	2856.07	3011.19	1265.09	1762.89	70463.1
Max	Madagascar	MDG	LIC	Africa	Sub-Saharan Africa	Eastern Africa	Other Africa	2.82111e+07	0.576321	3.99311e+06	2.02613e+06	1.97042e+06	0	55705.9	0	55705.9	0	2.10121e+06	1.97042e+06	4.3153e+06	70786.9	4.24754e+06	2.10121e+06	2.27711e+06	49890	2.23087e+06	1.97042e+06	405164	1.97042e+06	0	55705.9	0	349458	349458	0	1.67427e+06	640574	1.67213e+06	3024.62	1.62603e+06	529568	4.03351e+06	12319.1	8964.41	3354.71	5013.88	2453.17	2996.54	154080
Mean	Maldives	MDV	UMC	Asia	Southern Asia	NA	Other non-OECD Asia	484977	0.433499	256674	256674	256674	0	0	0	0	0	0	256674	269097	859.065	268238	0	268238	1663.01	266575	256674	9901.04	256674	0	0	0	9901.04	9901.04	0	208399	48274.8	208182	217.623	0	0	259196	150.46	109.479	40.9807	154.328	68.4693	85.8584	2998.12
Min	Maldives	MDV	UMC	Asia	Southern Asia	NA	Other non-OECD Asia	484977	0.433499	256674	256674	256674	0	0	0	0	0	0	256674	258566	706.056	257737	0	257737	302.135	257088	256674	414.087	256674	0	0	0	414.087	414.087	0	78425.7	223.714	78387.3	10.1594	0	0	257791	109.758	78.4021	28.699	28.0381	11.4062	13.3736	58.5627
Lower quartile	Maldives	MDV	UMC	Asia	Southern Asia	NA	Other non-OECD Asia	484977	0.433499	256674	256674	256674	0	0	0	0	0	0	256674	264075	817.993	263219	0	263219	1102.82	261589	256674	4914.78	256674	0	0	0	4914.78	4914.78	0	187786	22219.7	187582	100.438	0	0	258627	140.676	102.075	37.8893	102.341	45.375	57.0313	1286.3
Median	Maldives	MDV	UMC	Asia	Southern Asia	NA	Other non-OECD Asia	484977	0.433499	256674	256674	256674	0	0	0	0	0	0	256674	267608	854.293	266755	0	266755	1600.29	265078	256674	8403.83	256674	0	0	0	8403.83	8403.83	0	214666	42008.7	214461	185.464	0	0	259133	149.906	108.975	40.7584	148.507	65.0576	82.3199	2373.21
Upper quartile	Maldives	MDV	UMC	Asia	Southern Asia	NA	Other non-OECD Asia	484977	0.433499	256674	256674	256674	0	0	0	0	0	0	256674	272899	895.149	272015	0	272015	2145.28	270341	256674	13666.4	256674	0	0	0	13666.4	13666.4	0	234455	68888.4	234236	302.906	0	0	259686	159.757	116.414	43.7618	199.082	88.4312	111.207	4063.39
Max	Maldives	MDV	UMC	Asia	Southern Asia	NA	Other non-OECD Asia	484977	0.433499	256674	256674	256674	0	0	0	0	0	0	256674	299585	1085.01	298587	0	298587	3962.51	295133	256674	38458.6	256674	0	0	0	38458.6	38458.6	0	256451	178249	256122	867.642	0	0	261704	205.208	148.224	58.296	367.721	172.638	221.55	15176.4
Mean	Mexico	MEX	UMC	Americas	Latin America and the Caribbean	Central America	Other OECD America	1.25913e+08	0.227223	4.69492e+07	4.05556e+07	3.93974e+07	649480	508776	0	1.15826e+06	3.90146e+07	6.39359e+06	382738	5.07629e+07	158597	5.06043e+07	6.39359e+06	4.42107e+07	173798	4.40369e+07	3.93974e+07	4.63953e+06	382738	3.90146e+07	508776	0	4.13076e+06	3.48127e+06	649480	309739	72998.9	309422	317.287	1.92602e+06	4.46757e+06	7.10872e+06	27755.6	20201.1	7554.44	19935.6	8851.47	11084.1	1.05757e+06
Min	Mexico	MEX	UMC	Americas	Latin America and the Caribbean	Central America	Other OECD America	1.25913e+08	0.227223	4.48632e+07	3.85861e+07	3.73662e+07	603492	501830	0	1.10675e+06	3.69866e+07	5.78414e+06	357439	4.8521e+07	149437	4.83643e+07	5.78414e+06	4.19669e+07	156613	4.17945e+07	3.73662e+07	3.98353e+06	357439	3.69866e+07	501830	0	3.47843e+06	2.84424e+06	603492	216483	36443	216312	168.818	1.66855e+06	4.09124e+06	6.499e+06	26129.4	19004	7125.36	17600.8	7756.86	9803.46	848463
Lower quartile	Mexico	MEX	UMC	Americas	Latin America and the Caribbean	Central America	Other OECD America	1.25913e+08	0.227223	4.6482e+07	4.01303e+07	3.89735e+07	635132	503202	0	1.14305e+06	3.85919e+07	6.26991e+06	377369	5.02712e+07	156796	5.01131e+07	6.26991e+06	4.3757e+07	170092	4.35859e+07	3.89735e+07	4.47626e+06	377369	3.85919e+07	503202	0	3.96791e+06	3.31933e+06	635132	295754	55864.9	295507	241.014	1.87381e+06	4.38497e+06	6.98384e+06	27438.8	19968.2	7466.87	19411.5	8615.87	10790	999211
Median	Mexico	MEX	UMC	Americas	Latin America and the Caribbean	Central America	Other OECD America	1.25913e+08	0.227223	4.69456e+07	4.05511e+07	3.93934e+07	646446	506138	0	1.15532e+06	3.90103e+07	6.3893e+06	382612	5.07576e+07	158567	5.05971e+07	6.3893e+06	4.42072e+07	173519	4.40335e+07	3.93934e+07	4.61969e+06	382612	3.90103e+07	506138	0	4.11303e+06	3.46321e+06	646446	313613	68766.5	313229	293.946	1.92437e+06	4.46311e+06	7.10413e+06	27753.5	20197.1	7554.72	19919.5	8838.84	11076.2	1.04798e+06
Upper quartile	Mexico	MEX	UMC	Americas	Latin America and the Caribbean	Central America	Other OECD America	1.25913e+08	0.227223	4.74132e+07	4.09818e+07	3.98212e+07	660902	511429	0	1.17033e+06	3.94361e+07	6.50918e+06	387831	5.12488e+07	160390	5.10886e+07	6.50918e+06	4.46665e+07	177270	4.44894e+07	3.98212e+07	4.78233e+06	387831	3.94361e+07	511429	0	4.27343e+06	3.62258e+06	660902	326791	86559.2	326462	372.282	1.97467e+06	4.54803e+06	7.22841e+06	28070.9	20430.2	7640.52	20427.5	9067.46	11354.9	1.10597e+06
Max	Mexico	MEX	UMC	Americas	Latin America and the Caribbean	Central America	Other OECD America	1.25913e+08	0.227223	4.92276e+07	4.27814e+07	4.16589e+07	733678	554652	0	1.26648e+06	4.12764e+07	7.08349e+06	414967	5.33546e+07	169209	5.31922e+07	7.08349e+06	4.67816e+07	196760	4.65904e+07	4.16589e+07	5.57899e+06	414967	4.12764e+07	554652	0	5.07522e+06	4.44375e+06	733678	359946	159071	359714	815.27	2.19886e+06	4.91145e+06	7.81916e+06	29742.4	21646.6	8095.8	22767.9	10224.3	12670.4	1.46142e+06
Mean	Marshall Islands	MHL	UMC	Oceania	Micronesia	NA	Other non-OECD Asia	41255.1	0.401204	13401.7	8845.14	8845.14	0	0	0	0	8723.46	4556.59	121.682	14441.3	79.3861	14362	4556.59	9805.37	68.9957	9736.37	8845.14	891.231	121.682	8723.46	0	0	891.231	891.231	0	97.9252	23.7569	97.8266	0.0986355	1437.39	3119.2	4826.65	13.8781	10.0994	3.77871	8.62446	3.82532	4.79914	273.162
Min	Marshall Islands	MHL	UMC	Oceania	Micronesia	NA	Other non-OECD Asia	41255.1	0.401204	13401.7	8845.14	8845.14	0	0	0	0	8493.99	4556.59	0	13547.6	64.5722	13468.7	4556.59	8912.15	12.4434	8876.24	8845.14	31.1019	0	8493.99	0	0	31.1019	31.1019	0	0	0	0	0	625.984	2321.37	4651.64	9.91161	7.31311	2.4987	1.55543	0.579828	0.785534	4.9788
Lower quartile	Marshall Islands	MHL	UMC	Oceania	Micronesia	NA	Other non-OECD Asia	41255.1	0.401204	13401.7	8845.14	8845.14	0	0	0	0	8661.16	4556.59	48.6483	13996.8	75.4353	13920.4	4556.59	9363.85	45.8944	9297.18	8845.14	452.042	48.6483	8661.16	0	0	452.042	452.042	0	38.2427	5.31047	38.1708	0.0225245	1034.63	2709.53	4753.7	12.9021	9.37885	3.48835	5.73679	2.51339	3.15316	120.494
Median	Marshall Islands	MHL	UMC	Oceania	Micronesia	NA	Other non-OECD Asia	41255.1	0.401204	13401.7	8845.14	8845.14	0	0	0	0	8737.23	4556.59	107.911	14315.1	78.8089	14236.1	4556.59	9679.5	65.3166	9609.05	8845.14	763.91	107.911	8737.23	0	0	763.91	763.91	0	83.6705	14.7027	83.6467	0.0608363	1440.37	3116.22	4815.38	13.8053	10.0471	3.75263	8.16457	3.60882	4.52457	217.955
Upper quartile	Marshall Islands	MHL	UMC	Oceania	Micronesia	NA	Other non-OECD Asia	41255.1	0.401204	13401.7	8845.14	8845.14	0	0	0	0	8796.49	4556.59	183.979	14759.4	82.7986	14679.3	4556.59	10122.7	88.5459	10049	8845.14	1203.86	183.979	8796.49	0	0	1203.86	1203.86	0	146.296	32.6974	146.08	0.136739	1847.05	3521.96	4892.04	14.7595	10.7533	4.04521	11.0682	4.91847	6.16623	369.055
Max	Marshall Islands	MHL	UMC	Oceania	Micronesia	NA	Other non-OECD Asia	41255.1	0.401204	13401.7	8845.14	8845.14	0	0	0	0	8845.14	4556.59	351.152	17019.2	103.796	16931.3	4556.59	12374.7	184.585	12283.3	8845.14	3438.17	351.152	8845.14	0	0	3438.17	3438.17	0	329.58	217.207	329.347	0.783615	2235.22	3930.6	5112.5	19.7812	14.8378	5.41796	23.0731	11.3302	14.2537	1732
Mean	Macedonia	MKD	UMC	Europe	Southern Europe	NA	Other Eurasia	2.10996e+06	0.266892	708613	573994	573994	0	0	0	0	569946	134619	4047.27	769677	3047.83	766629	134619	632010	2717.11	629293	573994	55299.3	4047.27	569946	0	0	55299.3	55299.3	0	3274.36	772.909	3270.99	3.36981	42592.1	92027	144431	533.299	388.178	145.121	316.754	140.621	176.134	16780.4
Min	Macedonia	MKD	UMC	Europe	Southern Europe	NA	Other Eurasia	2.10996e+06	0.266892	562877	446760	446760	0	0	0	0	443218	93269.9	2600.97	624375	2488.02	621754	93269.9	505638	1854.82	503257	446760	31728.8	2600.97	443218	0	0	31728.8	31728.8	0	2073.88	394.527	2071.87	1.54277	27077.8	66192.2	102294	436.655	318.228	118.313	203.538	91.271	112.23	10053.6
Lower quartile	Macedonia	MKD	UMC	Europe	Southern Europe	NA	Other Eurasia	2.10996e+06	0.266892	681654	550589	550589	0	0	0	0	546951	126077	3701.05	742008	2926.14	739051	126077	607750	2549.89	605032	550589	50501.3	3701.05	546951	0	0	50501.3	50501.3	0	2992.88	672.977	2989.27	2.94232	39088	86253.3	135735	511.699	372.666	139.232	290.261	129.049	161.197	15070.5
Median	Macedonia	MKD	UMC	Europe	Southern Europe	NA	Other Eurasia	2.10996e+06	0.266892	708529	573517	573517	0	0	0	0	569437	134469	4029.64	769761	3046.04	766738	134469	631535	2703.57	628815	573517	54911.9	4029.64	569437	0	0	54911.9	54911.9	0	3257.96	760.747	3254.84	3.30246	42292.2	91876.6	144254	533.495	388.238	145.054	314.675	139.7	175.032	16561.4
Upper quartile	Macedonia	MKD	UMC	Europe	Southern Europe	NA	Other Eurasia	2.10996e+06	0.266892	735321	596905	596905	0	0	0	0	592683	142678	4359.56	796386	3161.2	793231	142678	655605	2878.93	652919	596905	59644.8	4359.56	592683	0	0	59644.8	59644.8	0	3536.12	857.131	3532.74	3.73891	45656.1	97538.5	152603	553.577	402.855	150.708	340.171	150.924	189.49	18343
Max	Macedonia	MKD	UMC	Europe	Southern Europe	NA	Other Eurasia	2.10996e+06	0.266892	873571	715012	715012	0	0	0	0	710304	179363	6002.04	943824	3806.53	940017	179363	781458	3909.92	777673	715012	85142.3	6002.04	710304	0	0	85142.3	85142.3	0	4847.8	1410.72	4842.3	5.92795	62704.9	125814	190671	658.629	480.782	177.848	492.352	218.189	274.163	27719.8
Mean	Mali	MLI	LIC	Africa	Sub-Saharan Africa	Western Africa	Other Africa	2.12236e+07	0.532464	3.53873e+06	1.07004e+06	1.07004e+06	0	0	0	0	0	2.46869e+06	1.07004e+06	3.80081e+06	75930	3.72488e+06	2.46869e+06	1.25619e+06	16984.5	1.2392e+06	1.07004e+06	169167	1.07004e+06	0	0	0	169167	169167	0	864219	205819	863335	883.676	1.84906e+06	619631	3.63164e+06	13290.3	9673.36	3616.97	920.859	384.604	536.255	51498.1
Min	Mali	MLI	LIC	Africa	Sub-Saharan Africa	Western Africa	Other Africa	2.12236e+07	0.532464	3.09946e+06	865064	865064	0	0	0	0	0	2.11805e+06	865064	3.33279e+06	64087.9	3.26663e+06	2.11805e+06	1.04249e+06	9268.42	1.02945e+06	865064	98169.1	865064	0	0	0	98169.1	98169.1	0	597778	70782.2	597028	316.265	1.50817e+06	401414	3.18119e+06	11084.4	8084.56	2999.87	472.04	184.859	273.934	25482.5
Lower quartile	Mali	MLI	LIC	Africa	Sub-Saharan Africa	Western Africa	Other Africa	2.12236e+07	0.532464	3.45712e+06	1.02645e+06	1.02645e+06	0	0	0	0	0	2.39427e+06	1.02645e+06	3.71281e+06	73577.2	3.63872e+06	2.39427e+06	1.2083e+06	14979.5	1.19179e+06	1.02645e+06	147856	1.02645e+06	0	0	0	147856	147856	0	813780	162970	812951	702.429	1.77783e+06	572499	3.54808e+06	12852.3	9355.75	3493.01	805.303	331.807	465.602	43371.4
Median	Mali	MLI	LIC	Africa	Sub-Saharan Africa	Western Africa	Other Africa	2.12236e+07	0.532464	3.53622e+06	1.06701e+06	1.06701e+06	0	0	0	0	0	2.46951e+06	1.06701e+06	3.80006e+06	75853.4	3.72401e+06	2.46951e+06	1.2522e+06	16783.3	1.23545e+06	1.06701e+06	166245	1.06701e+06	0	0	0	166245	166245	0	867553	197733	866864	844.855	1.84932e+06	619218	3.62967e+06	13278.2	9666.34	3613.15	900.08	375.444	523.608	49855.1
Upper quartile	Mali	MLI	LIC	Africa	Sub-Saharan Africa	Western Africa	Other Africa	2.12236e+07	0.532464	3.61989e+06	1.10778e+06	1.10778e+06	0	0	0	0	0	2.54203e+06	1.10778e+06	3.8853e+06	78232.4	3.80726e+06	2.54203e+06	1.30035e+06	18768.5	1.28274e+06	1.10778e+06	187527	1.10778e+06	0	0	0	187527	187527	0	914917	241331	914058	1025.09	1.91861e+06	666941	3.71445e+06	13714.1	9984.46	3734.98	1016.41	427.719	594.112	57799
Max	Mali	MLI	LIC	Africa	Sub-Saharan Africa	Western Africa	Other Africa	2.12236e+07	0.532464	3.99525e+06	1.31713e+06	1.31713e+06	0	0	0	0	0	2.84593e+06	1.31713e+06	4.25057e+06	90281	4.16653e+06	2.84593e+06	1.52548e+06	32989	1.50935e+06	1.31713e+06	277119	1.31713e+06	0	0	0	277119	277119	0	1.16138e+06	447723	1.16034e+06	2040.24	2.21518e+06	857437	4.09841e+06	15776.5	11408.5	4368.03	2252.35	1024.42	1273.8	114875
Mean	Malta	MLT	HIC	Europe	Southern Europe	NA	Other EU	512178	0.0496837	257273	257273	217787	39485.9	0	0	39485.9	217787	0	0	257774	109.038	257665	0	257665	115.376	257550	217787	39762.9	0	217787	0	0	39762.9	276.985	39485.9	0	0	0	0	0	0	224.414	19.0813	13.8874	5.19394	15.6116	9.6323	5.97926	6.3814
Min	Malta	MLT	HIC	Europe	Southern Europe	NA	Other EU	512178	0.0496837	217019	217019	179877	22536.5	0	0	22536.5	179877	0	0	217512	77.4866	217424	0	217424	72.5787	217326	179877	22810.8	0	179877	0	0	22810.8	210.985	22536.5	0	0	0	0	0	0	155.105	13.6199	9.87865	3.7412	9.47843	5.71307	3.59457	4.55034
Lower quartile	Malta	MLT	HIC	Europe	Southern Europe	NA	Other EU	512178	0.0496837	247634	247634	208880	35892.1	0	0	35892.1	208880	0	0	248122	101.966	248017	0	248017	105.346	247912	208880	36170.7	0	208880	0	0	36170.7	264.715	35892.1	0	0	0	0	0	0	208.32	17.8173	12.9648	4.84854	13.9863	8.60388	5.2979	5.95918
Median	Malta	MLT	HIC	Europe	Southern Europe	NA	Other EU	512178	0.0496837	256837	256837	217466	39275.5	0	0	39275.5	217466	0	0	257338	108.49	257229	0	257229	114.223	257115	217466	39550.8	0	217466	0	0	39550.8	277.045	39275.5	0	0	0	0	0	0	222.982	18.9746	13.8058	5.16344	15.3713	9.48674	5.88016	6.35762
Upper quartile	Malta	MLT	HIC	Europe	Southern Europe	NA	Other EU	512178	0.0496837	266690	266690	226085	42806.8	0	0	42806.8	226085	0	0	267188	115.69	267082	0	267082	124.436	266969	226085	43085.7	0	226085	0	0	43085.7	289.36	42806.8	0	0	0	0	0	0	239.291	20.2848	14.7691	5.52106	16.972	10.4824	6.54736	6.78286
Max	Malta	MLT	HIC	Europe	Southern Europe	NA	Other EU	512178	0.0496837	311528	311528	273687	62064.2	0	0	62064.2	273687	0	0	312094	147.995	311959	0	311959	184.036	311808	273687	62357.9	0	273687	0	0	62357.9	338.63	62064.2	0	0	0	0	0	0	326.31	26.0123	18.8456	7.22521	28.4358	17.6808	11.5343	8.51255
Mean	Myanmar	MMR	LMC	Asia	South-eastern Asia	NA	Other non-OECD Asia	5.33879e+07	0.303555	1.12198e+07	6.59238e+06	6.59181e+06	0	568.787	0	568.787	0	4.62743e+06	6.59181e+06	1.24926e+07	100835	1.23918e+07	4.62743e+06	7.76435e+06	81992.1	7.68236e+06	6.59181e+06	1.09055e+06	6.59181e+06	0	568.787	0	1.08998e+06	1.08998e+06	0	5.33706e+06	1.25475e+06	5.33158e+06	5476.35	2.59198e+06	2.03545e+06	1.14021e+07	17641.6	12840.8	4800.78	9372.44	3918.58	5453.86	331136
Min	Myanmar	MMR	LMC	Asia	South-eastern Asia	NA	Other non-OECD Asia	5.33879e+07	0.303555	9.01092e+06	4.96515e+06	4.96515e+06	0	0	0	0	0	3.25434e+06	4.96515e+06	1.01432e+07	78481.7	1.00595e+07	3.25434e+06	6.08524e+06	56883.7	6.01244e+06	4.96515e+06	689727	4.96515e+06	0	0	0	689727	689727	0	3.85342e+06	698740	3.84994e+06	3224.46	1.61427e+06	1.21527e+06	9.15745e+06	13593.9	9910.97	3667.35	5420.43	2307.88	3112.55	184895
Lower quartile	Myanmar	MMR	LMC	Asia	South-eastern Asia	NA	Other non-OECD Asia	5.33879e+07	0.303555	1.08017e+07	6.26219e+06	6.26095e+06	0	0	0	0	0	4.33116e+06	6.26095e+06	1.20534e+07	96221	1.19566e+07	4.33116e+06	7.41193e+06	76337.3	7.33368e+06	6.26095e+06	997317	6.26095e+06	0	0	0	996313	996313	0	5.04038e+06	1.11761e+06	5.03529e+06	4871.97	2.37839e+06	1.84631e+06	1.09799e+07	16834.6	12255.2	4578.03	8531.74	3539.18	4945.66	297879
Median	Myanmar	MMR	LMC	Asia	South-eastern Asia	NA	Other non-OECD Asia	5.33879e+07	0.303555	1.12043e+07	6.57681e+06	6.5764e+06	0	0	0	0	0	4.61003e+06	6.5764e+06	1.24772e+07	100571	1.23761e+07	4.61003e+06	7.74702e+06	81740.1	7.66436e+06	6.5764e+06	1.08337e+06	6.5764e+06	0	0	0	1.08237e+06	1.08237e+06	0	5.32355e+06	1.24311e+06	5.31796e+06	5421.89	2.57137e+06	2.02053e+06	1.13888e+07	17610.9	12820.6	4793.13	9297.26	3875.03	5399.31	328091
Upper quartile	Myanmar	MMR	LMC	Asia	South-eastern Asia	NA	Other non-OECD Asia	5.33879e+07	0.303555	1.16236e+07	6.90912e+06	6.90841e+06	0	0	0	0	0	4.89831e+06	6.90841e+06	1.29085e+07	105155	1.28038e+07	4.89831e+06	8.09683e+06	87100.4	8.00992e+06	6.90841e+06	1.1769e+06	6.90841e+06	0	0	0	1.17609e+06	1.17609e+06	0	5.61769e+06	1.38261e+06	5.61202e+06	6017.1	2.78129e+06	2.20428e+06	1.1809e+07	18402.7	13393.7	5008.59	10147.3	4254.08	5923.07	361004
Max	Myanmar	MMR	LMC	Asia	South-eastern Asia	NA	Other non-OECD Asia	5.33879e+07	0.303555	1.35877e+07	8.5419e+06	8.5419e+06	0	8255.4	0	8255.4	0	6.27747e+06	8.5419e+06	1.5012e+07	130367	1.48906e+07	6.27747e+06	9.78043e+06	110931	9.68492e+06	8.5419e+06	1.64581e+06	8.5419e+06	0	8255.4	0	1.64581e+06	1.64581e+06	0	6.95549e+06	2.05004e+06	6.9504e+06	9105.48	4.20848e+06	3.24902e+06	1.38014e+07	22674.1	16499	6216.1	14640.9	6768.86	8616.57	534004
Mean	Montenegro	MNE	UMC	Europe	Southern Europe	NA	Other Eurasia	626690	0.179249	367707	319771	319752	19.1516	0	0	19.1516	315802	47936.3	3949.39	389104	1481.06	387623	47936.3	339686	1410.55	338276	319752	18524.2	3949.39	315802	0	0	18524.2	18505	19.1516	3193.73	755.666	3190.43	3.29644	16620.7	31315.5	54777.3	259.231	188.672	70.5586	178.434	79.2182	99.2158	5629.69
Min	Montenegro	MNE	UMC	Europe	Southern Europe	NA	Other Eurasia	626690	0.179249	294206	249551	249551	0	0	0	0	245807	27121.1	2661.06	310646	1094.24	309471	27121.1	266767	772.064	265458	249551	7413.01	2661.06	245807	0	0	7413.01	7413.01	0	1696.25	103.041	1693.1	0.638655	7539.01	17344.4	32005.6	191.554	139.053	52.5015	83.422	37.2777	46.1444	1695.34
Lower quartile	Montenegro	MNE	UMC	Europe	Southern Europe	NA	Other Eurasia	626690	0.179249	354265	306709	306684	0	0	0	0	302818	39868.2	3730.43	375483	1405.56	374021	39868.2	326134	1242.69	324807	306684	14739.9	3730.43	302818	0	0	14739.9	14727.7	0	2900.35	467.951	2897.56	2.01969	13353.5	26199.7	46704	245.521	178.691	66.7044	152.201	67.6158	84.6126	4277.59
Median	Montenegro	MNE	UMC	Europe	Southern Europe	NA	Other Eurasia	626690	0.179249	368148	320153	320146	0	0	0	0	316166	46011.5	3952.72	389471	1480.15	388023	46011.5	340132	1390.5	338763	320146	17670	3952.72	316166	0	0	17670	17629.6	0	3216.19	689.794	3213.09	2.9657	15670.2	30141.3	52907.7	258.673	188.422	70.2556	175.773	77.9902	97.7156	5279.2
Upper quartile	Montenegro	MNE	UMC	Europe	Southern Europe	NA	Other Eurasia	626690	0.179249	381363	333190	333145	0	0	0	0	329181	54998.2	4167.1	403490	1552.31	401938	54998.2	353784	1568.29	352203	333145	21553.3	4167.1	329181	0	0	21553.3	21538.6	0	3517.13	978.751	3512.97	4.21649	19216.7	35701.4	61869.6	272.358	198.269	74.189	201.844	89.582	112.383	6606.9
Max	Montenegro	MNE	UMC	Europe	Southern Europe	NA	Other Eurasia	626690	0.179249	431425	387382	387382	337.602	0	0	337.602	382724	86071.3	5141.24	463558	1967.62	461708	86071.3	414909	2347.39	413545	387382	40610.2	5141.24	382724	0	0	40610.2	40610.2	337.602	4477.49	2269.96	4474.46	11.9879	37552.3	59137.4	92431.9	346.544	253.012	93.5316	318.785	152.555	177.11	18779
Mean	Mongolia	MNG	LMC	Asia	Eastern Asia	NA	Other non-OECD Asia	3.29422e+06	0.297372	902651	803377	803046	0	330.524	0	330.524	0	99274.2	803046	980709	5145.65	975563	99274.2	876289	4985.61	871303	803046	68257	803046	0	330.524	0	67926.4	67926.4	0	650024	153022	649350	674.328	54171.8	45102.4	912452	900.815	655.634	245.181	724.415	302.893	421.522	20645.7
Min	Mongolia	MNG	LMC	Asia	Eastern Asia	NA	Other non-OECD Asia	3.29422e+06	0.297372	432588	339648	339318	0	0.837835	0	0.837835	0	79624.7	339318	475072	3537.66	471534	79624.7	378594	1967.88	376332	339318	16662.7	339318	0	0.837835	0	16439.5	16439.5	0	266295	32726.6	266087	152.329	42539.9	33736.7	438058	615.222	447.501	167.721	226.956	90.1617	132.76	4857.83
Lower quartile	Mongolia	MNG	LMC	Asia	Eastern Asia	NA	Other non-OECD Asia	3.29422e+06	0.297372	743344	643337	642905	0	188.927	0	188.927	0	94202	642905	815302	4629.53	810614	94202	711717	3784.86	706928	642905	43537.2	642905	0	188.927	0	43221.3	43221.3	0	507947	88137.8	507612	386.642	50979.7	42368.4	751700	808.311	588.147	219.752	508.36	204.776	292.742	12180.4
Median	Mongolia	MNG	LMC	Asia	Eastern Asia	NA	Other non-OECD Asia	3.29422e+06	0.297372	870940	771428	770941	0	286.513	0	286.513	0	98701.2	770941	952190	5034.88	947089	98701.2	848356	4648.8	843435	770941	60852.5	770941	0	286.513	0	60559.5	60559.5	0	620668	129932	620005	562.753	53686	44713.3	880341	880.947	641.417	239.616	664.831	268.441	380.511	17369.3
Upper quartile	Mongolia	MNG	LMC	Asia	Eastern Asia	NA	Other non-OECD Asia	3.29422e+06	0.297372	1.04302e+06	943727	943520	0	421.603	0	421.603	0	103542	943520	1.12145e+06	5546.94	1.11585e+06	103542	1.01753e+06	5812.51	1.01223e+06	943520	85386.8	943520	0	421.603	0	85153.6	85153.6	0	767539	194227	766946	841.636	56942.1	47430.1	1.05347e+06	971.773	707.367	264.747	872.863	364.851	506.454	25569.8
Max	Mongolia	MNG	LMC	Asia	Eastern Asia	NA	Other non-OECD Asia	3.29422e+06	0.297372	1.52576e+06	1.42592e+06	1.42544e+06	0	1807.19	0	1807.19	0	128932	1.42544e+06	1.65531e+06	8589.65	1.64817e+06	128932	1.54123e+06	14174.6	1.53194e+06	1.42544e+06	218123	1.42544e+06	0	1807.19	0	218035	218035	0	1.3316e+06	766973	1.32977e+06	3608.54	79271	65034.8	1.54686e+06	1468.39	1072.26	408.335	2410.73	1213.58	1749.03	90672.2
Mean	Northern Mariana Islands	MNP	HIC	Oceania	Micronesia	NA	Other non-OECD Asia	49433	0.322874	32847.5	32832.1	30684	2148.11	0	0	2148.11	30684	15.3358	0	32949.1	45.881	32903.3	15.3358	32887.9	36.6883	32851.2	30684	2167.22	0	30684	0	0	2167.22	19.1116	2148.11	0	0	0	0	10.1001	5.23574	97.9052	8.03237	5.8454	2.18698	5.15473	3.16922	1.98551	0.442559
Min	Northern Mariana Islands	MNP	HIC	Oceania	Micronesia	NA	Other non-OECD Asia	49433	0.322874	30084.6	30066	21375.6	0	0	0	0	21375.6	0	0	30200.9	21.9116	30157	0	30138.4	6.32509	30084.9	21375.6	5.88182	0	21375.6	0	0	5.88182	5.44851	0	0	0	0	0	0	0	33.486	3.56892	2.57546	0.9932	0.65349	0.406806	0.181599	0.010817
Lower quartile	Northern Mariana Islands	MNP	HIC	Oceania	Micronesia	NA	Other non-OECD Asia	49433	0.322874	32220.8	32202.9	29719.2	358.668	0	0	358.668	29719.2	0	0	32321.9	37.9957	32279	0	32260.1	24.7653	32223.4	29719.2	375.847	0	29719.2	0	0	375.847	12.3623	358.668	0	0	0	0	0	0	72.0151	6.57914	4.78501	1.78905	3.07024	1.85115	1.13423	0.242543
Median	Northern Mariana Islands	MNP	HIC	Oceania	Micronesia	NA	Other non-OECD Asia	49433	0.322874	32908.7	32893.3	31622.2	959.061	0	0	959.061	31622.2	0	0	33006.7	44.6908	32959.2	0	32945.9	34.1225	32911.1	31622.2	975.074	0	31622.2	0	0	975.074	19.2526	959.061	0	0	0	0	0	0	90.5926	7.84569	5.69427	2.13082	4.47511	2.72732	1.6694	0.395199
Upper quartile	Northern Mariana Islands	MNP	HIC	Oceania	Micronesia	NA	Other non-OECD Asia	49433	0.322874	33497.5	33479.6	32539.1	3104.73	0	0	3104.73	32539.1	27.7486	0	33598.4	52.4378	33552.1	27.7486	33534.7	46.0046	33496.7	32539.1	3122.69	0	32539.1	0	0	3122.69	25.6933	3104.73	0	0	0	0	16.4486	6.28262	116.999	9.18088	6.68577	2.50051	6.40501	3.95208	2.49175	0.610352
Max	Northern Mariana Islands	MNP	HIC	Oceania	Micronesia	NA	Other non-OECD Asia	49433	0.322874	35256.1	35256.1	34882.5	10674	0	0	10674	34882.5	235.592	0	35358.6	90.8404	35311.4	235.592	35311.4	129.693	35275.9	34882.5	10705.6	0	34882.5	0	0	10705.6	34.5951	10674	0	0	0	0	212.585	114.566	321.148	17.6038	12.3627	5.2411	23.7074	16.1926	11.5654	1.31593
Mean	Mozambique	MOZ	LIC	Africa	Sub-Saharan Africa	Eastern Africa	Other Africa	3.11775e+07	0.496092	5.216e+06	2.07495e+06	2.07495e+06	0	0	0	0	0	3.14104e+06	2.07495e+06	5.61569e+06	98123.5	5.51756e+06	3.14104e+06	2.37652e+06	34097.3	2.34242e+06	2.07495e+06	267468	2.07495e+06	0	0	0	267468	267468	0	1.67842e+06	396534	1.6767e+06	1716.37	2.31325e+06	827787	5.34822e+06	17170.6	12497.1	4673.53	3001.03	1254.31	1746.72	81155.6
Min	Mozambique	MOZ	LIC	Africa	Sub-Saharan Africa	Eastern Africa	Other Africa	3.11775e+07	0.496092	4.28688e+06	1.72822e+06	1.72822e+06	0	0	0	0	0	2.53401e+06	1.72822e+06	4.65017e+06	79286.1	4.56755e+06	2.53401e+06	1.99238e+06	20452.8	1.96429e+06	1.72822e+06	182728	1.72822e+06	0	0	0	182728	182728	0	1.10094e+06	177308	1.10007e+06	788.126	1.80442e+06	583452	4.39631e+06	13932.7	10089.1	3806.64	1553.89	653.804	874.864	52235.1
Lower quartile	Mozambique	MOZ	LIC	Africa	Sub-Saharan Africa	Eastern Africa	Other Africa	3.11775e+07	0.496092	5.04497e+06	1.98661e+06	1.98661e+06	0	0	0	0	0	3.01043e+06	1.98661e+06	5.43651e+06	94133.4	5.3421e+06	3.01043e+06	2.28372e+06	29976.2	2.25158e+06	1.98661e+06	244703	1.98661e+06	0	0	0	244703	244703	0	1.58325e+06	313757	1.58186e+06	1359.11	2.21165e+06	770508	5.17369e+06	16471.2	11991.8	4480.66	2580.02	1058.24	1481.48	72308.5
Median	Mozambique	MOZ	LIC	Africa	Sub-Saharan Africa	Eastern Africa	Other Africa	3.11775e+07	0.496092	5.21148e+06	2.06619e+06	2.06619e+06	0	0	0	0	0	3.1344e+06	2.06619e+06	5.6113e+06	97925.7	5.51292e+06	3.1344e+06	2.36703e+06	33676.4	2.33311e+06	2.06619e+06	263833	2.06619e+06	0	0	0	263833	263833	0	1.68235e+06	378961	1.68065e+06	1632.39	2.31058e+06	825242	5.34307e+06	17138.1	12473.9	4662.57	2960.88	1224.85	1707.51	79583.4
Upper quartile	Mozambique	MOZ	LIC	Africa	Sub-Saharan Africa	Eastern Africa	Other Africa	3.11775e+07	0.496092	5.38304e+06	2.15565e+06	2.15565e+06	0	0	0	0	0	3.26656e+06	2.15565e+06	5.78437e+06	101813	5.68318e+06	3.26656e+06	2.45985e+06	37754.4	2.42441e+06	2.15565e+06	288254	2.15565e+06	0	0	0	288254	288254	0	1.77685e+06	463408	1.77507e+06	1993.48	2.41046e+06	880686	5.51943e+06	17807	12965.3	4852.07	3366.12	1411.35	1969.3	88107.9
Max	Mozambique	MOZ	LIC	Africa	Sub-Saharan Africa	Eastern Africa	Other Africa	3.11775e+07	0.496092	6.19123e+06	2.72647e+06	2.72647e+06	0	0	0	0	0	3.92557e+06	2.72647e+06	6.66496e+06	121602	6.55236e+06	3.92557e+06	3.03529e+06	53318.2	2.99387e+06	2.72647e+06	404720	2.72647e+06	0	0	0	404720	404720	0	2.39075e+06	830256	2.38802e+06	3870.47	2.92183e+06	1.11646e+06	6.34471e+06	21291.7	15564.5	5732.04	5820.22	2392.36	3448.38	141446
Mean	Mauritania	MRT	LMC	Africa	Sub-Saharan Africa	Western Africa	Other Africa	4.48219e+06	0.407973	940691	213545	213543	0	2.19013	0	2.19013	0	727146	213543	1.03398e+06	13401.6	1.02058e+06	727146	293433	2570.37	290862	213543	77319	213543	0	2.19013	0	77316.8	77316.8	0	172659	40884.2	172482	177.147	407737	319409	956661	2345.85	1707.54	638.316	295.834	123.772	172.062	23537.6
Min	Mauritania	MRT	LMC	Africa	Sub-Saharan Africa	Western Africa	Other Africa	4.48219e+06	0.407973	594353	119478	119478	0	0	0	0	0	450792	119478	647072	9106.43	637966	450792	180445	1400.38	178371	119478	30636.7	119478	0	0	0	30636.7	30636.7	0	95597.8	15437.9	95506.6	64.0955	207328	125245	606917	1557.22	1137.52	419.705	126.105	51.4244	72.8869	7965.23
Lower quartile	Mauritania	MRT	LMC	Africa	Sub-Saharan Africa	Western Africa	Other Africa	4.48219e+06	0.407973	845037	190983	190983	0	0	0	0	0	646073	190983	937151	12317.7	924481	646073	263843	2265.51	261627	190983	56938.3	190983	0	0	0	56938.3	56938.3	0	152776	32989.2	152623	142.398	331270	247240	861106	2149.76	1563.44	584.017	245.463	101.215	141.676	16547.1
Median	Mauritania	MRT	LMC	Africa	Sub-Saharan Africa	Western Africa	Other Africa	4.48219e+06	0.407973	931482	211957	211949	0	0	0	0	0	718152	211949	1.02538e+06	13281.3	1.01219e+06	718152	291063	2531.59	288424	211949	71356.8	211949	0	0	0	71356.8	71356.8	0	171028	39465.5	170848	170.54	393457	307095	947744	2327.45	1692.59	632.518	285.803	119.017	166.025	21013.4
Upper quartile	Mauritania	MRT	LMC	Africa	Sub-Saharan Africa	Western Africa	Other Africa	4.48219e+06	0.407973	1.02581e+06	233238	233238	0	0	0	0	0	800978	233238	1.12348e+06	14374.3	1.10972e+06	800978	320497	2838.26	317587	233238	92092.6	233238	0	0	0	92092.6	92092.6	0	189947	47142.6	189752	204.362	470703	379350	1.04257e+06	2519.98	1834.07	686.178	336.394	140.254	196.122	27886.6
Max	Mauritania	MRT	LMC	Africa	Sub-Saharan Africa	Western Africa	Other Africa	4.48219e+06	0.407973	1.39011e+06	353506	353506	0	205.621	0	205.621	0	1.07261e+06	353506	1.48036e+06	19255.7	1.46167e+06	1.07261e+06	481057	4953.19	477339	353506	205322	353506	0	205.621	0	205322	205322	0	301228	99012.1	301043	455.804	828865	686360	1.41292e+06	3441.33	2533.33	932.987	754.605	284.206	475.016	85647.4
Mean	Montserrat	MSR	HIC	Americas	Latin America and the Caribbean	Caribbean	Latin America	4472.02	1	2544.41	2395.64	2375.28	20.357	0	0	20.357	2375.28	148.777	0	2553.44	4.24932	2549.19	148.777	2400.42	4.77904	2395.64	2375.28	20.357	0	2375.28	0	0	20.357	0	20.357	0	0	0	0	99.0006	49.7763	157.805	0.745743	0.54277	0.202974	0.601518	0.36991	0.231608	0
Min	Montserrat	MSR	HIC	Americas	Latin America and the Caribbean	Caribbean	Latin America	4472.02	1	375.426	375.426	375.426	0	0	0	0	375.426	0	0	377.056	0.493771	376.562	0	376.562	0.281107	375.426	375.426	0	0	375.426	0	0	0	0	0	0	0	0	0	0	0	0.906526	0.0847911	0.0602792	0.0239551	0.0158906	0.00796707	0.00526445	0
Lower quartile	Montserrat	MSR	HIC	Americas	Latin America and the Caribbean	Caribbean	Latin America	4472.02	1	1501.71	1408.79	1402.47	0	0	0	0	1402.47	0	0	1509.13	2.26378	1505.82	0	1410.5	2.03531	1408.79	1402.47	0	0	1402.47	0	0	0	0	0	0	0	0	0	0	0	8.82162	0.396674	0.28861	0.108229	0.234632	0.142832	0.0856211	0
Median	Montserrat	MSR	HIC	Americas	Latin America and the Caribbean	Caribbean	Latin America	4472.02	1	2685.11	2465.54	2446.87	0	0	0	0	2446.87	31.1498	0	2696.18	3.63416	2690.58	31.1498	2470.64	3.69283	2465.54	2446.87	0	0	2446.87	0	0	0	0	0	0	0	0	0	18.8602	6.62914	38.4552	0.635014	0.461477	0.172356	0.437166	0.266072	0.162895	0
Upper quartile	Montserrat	MSR	HIC	Americas	Latin America and the Caribbean	Caribbean	Latin America	4472.02	1	3448.21	3264.58	3231.93	17.35	0	0	17.35	3231.93	217.258	0	3465.26	5.55351	3459.25	217.258	3269.65	6.20093	3264.58	3231.93	17.35	0	3231.93	0	0	17.35	0	17.35	0	0	0	0	135.333	53.2954	223.774	0.979267	0.71184	0.26739	0.773758	0.471609	0.302118	0
Max	Montserrat	MSR	HIC	Americas	Latin America and the Caribbean	Caribbean	Latin America	4472.02	1	5664.04	5664.04	5664.04	385.963	0	0	385.963	5664.04	1395.64	0	5685.77	19.8565	5675.11	1395.64	5675.11	33.0766	5664.04	5664.04	385.963	0	5664.04	0	0	385.963	0	385.963	0	0	0	0	1282.58	730.616	1404.87	3.75436	2.77748	0.976881	6.78303	4.79162	2.79789	0
Mean	Martinique	MTQ	HIC	Americas	Latin America and the Caribbean	Caribbean	OECD EU countries	368818	0.253981	143381	142101	126208	15892.8	0	0	15892.8	126208	1279.95	0	143817	124.341	143692	1279.95	142412	154.654	142258	126208	16049.9	0	126208	0	0	16049.9	157.09	15892.8	0	0	0	0	844.008	435.937	1558.94	21.7783	15.8506	5.92764	19.186	11.8516	7.33434	3.62025
Min	Martinique	MTQ	HIC	Americas	Latin America and the Caribbean	Caribbean	OECD EU countries	368818	0.253981	71301	70719.7	57708.8	0	0	0	0	57708.8	0	0	71602.5	50.0635	71540	0	70947	44.7798	70877.7	57708.8	65.8177	0	57708.8	0	0	65.8177	56.8287	0	0	0	0	0	0	0	134.198	8.91876	6.48178	2.43697	4.78851	2.63999	1.84298	0.663428
Lower quartile	Martinique	MTQ	HIC	Americas	Latin America and the Caribbean	Caribbean	OECD EU countries	368818	0.253981	126374	125217	109584	6789.03	0	0	6789.03	109584	551.838	0	126778	104.199	126671	551.838	125555	117.134	125409	109584	6934.62	0	109584	0	0	6934.62	128.924	6789.03	0	0	0	0	319.881	101.106	809.926	18.1288	13.1912	4.91981	13.7799	8.42711	5.1195	2.69157
Median	Martinique	MTQ	HIC	Americas	Latin America and the Caribbean	Caribbean	OECD EU countries	368818	0.253981	142127	140688	124780	14122.9	0	0	14122.9	124780	1134.78	0	142541	121.674	142417	1134.78	141008	147.324	140855	124780	14269	0	124780	0	0	14269	156.765	14122.9	0	0	0	0	732.205	341.375	1412.98	21.2985	15.5051	5.789	17.9698	11.0468	6.78909	3.49442
Upper quartile	Martinique	MTQ	HIC	Americas	Latin America and the Caribbean	Caribbean	OECD EU countries	368818	0.253981	159185	157789	141801	22830.1	0	0	22830.1	141801	1854.17	0	159709	141.358	159548	1854.17	158110	184.556	157950	141801	22993	0	141801	0	0	22993	184.597	22830.1	0	0	0	0	1225.16	644.504	2129.84	24.8096	18.0431	6.74449	23.1022	14.312	8.89489	4.40592
Max	Martinique	MTQ	HIC	Americas	Latin America and the Caribbean	Caribbean	OECD EU countries	368818	0.253981	240961	238964	217148	74290.3	0	0	74290.3	217148	6913.54	0	241649	263.492	241450	6913.54	239454	438.06	239172	217148	74508.8	0	217148	0	0	74508.8	259.354	74290.3	0	0	0	0	4825.06	2926.52	7309.81	47.0781	33.9893	13.1013	64.5601	41.3561	30.1451	8.18065
Mean	Mauritius	MUS	UMC	Africa	Sub-Saharan Africa	Eastern Africa	Other Africa	1.29589e+06	0.0866795	400703	384574	383732	842.32	0	0	842.32	342680	16129.6	41051.1	445571	1170.92	444400	16129.6	428271	1349.59	426921	383732	43189.4	41051.1	342680	0	0	43189.4	42347	842.32	33165.2	7885.94	33131.6	33.5591	5947.15	10182.4	59701.2	204.988	149.198	55.7908	173.106	76.8224	96.2833	12841.2
Min	Mauritius	MUS	UMC	Africa	Sub-Saharan Africa	Eastern Africa	Other Africa	1.29589e+06	0.0866795	310573	297727	296765	0	0	0	0	268283	11345.5	17905.6	359459	876.904	358510	11345.5	344861	664.4	343979	296765	14347.9	17905.6	268283	0	0	14347.9	14347.9	0	9569.09	79.2331	9557.26	1.47817	3272.52	6275.04	35733.7	148.75	108.143	40.4079	75.028	31.7989	41.8705	4106.59
Lower quartile	Mauritius	MUS	UMC	Africa	Sub-Saharan Africa	Eastern Africa	Other Africa	1.29589e+06	0.0866795	383329	367945	367206	294.56	0	0	294.56	327548	14972.2	33790.3	426064	1098.21	424991	14972.2	409768	1188.47	408519	367206	35207.2	33790.3	327548	0	0	35207.2	34284.4	294.56	26341.3	3546.84	26315.1	14.7814	5289	9321.84	52329.5	191.738	139.551	52.1273	147.512	65.4513	82.0278	9988
Median	Mauritius	MUS	UMC	Africa	Sub-Saharan Africa	Eastern Africa	Other Africa	1.29589e+06	0.0866795	399378	383264	382419	726.59	0	0	726.59	341568	16030.6	38508.8	444435	1166.37	443244	16030.6	427250	1335.58	425936	382419	42021.1	38508.8	341568	0	0	42021.1	41184.5	726.59	31691	6731.67	31663.2	26.85	5886.73	10089.7	57387.5	204.194	148.636	55.5304	170.237	75.4521	94.754	12253
Upper quartile	Mauritius	MUS	UMC	Africa	Sub-Saharan Africa	Eastern Africa	Other Africa	1.29589e+06	0.0866795	417033	400218	399364	1252.87	0	0	1252.87	356649	17157.8	47726.6	462965	1237.87	461731	17157.8	444644	1498.36	443246	399364	49520.9	47726.6	356649	0	0	49520.9	48772	1252.87	38817.4	10738.2	38769.2	45.3075	6538.75	10976.6	66315.2	217.364	158.294	59.2432	195.295	86.9685	108.339	14933.9
Max	Mauritius	MUS	UMC	Africa	Sub-Saharan Africa	Eastern Africa	Other Africa	1.29589e+06	0.0866795	494122	474115	472087	3738.15	0	0	3738.15	431510	23492.1	73873.9	554308	1603.29	552863	23492.1	534663	2437.2	533136	472087	101416	73873.9	431510	0	0	101416	100163	3738.15	71075.1	41792.8	70988.3	206.941	9693.04	16580.7	95575.3	281.454	204.567	77.649	329.52	150.498	184.126	36355.3
Mean	Malawi	MWI	LIC	Africa	Sub-Saharan Africa	Eastern Africa	Other Africa	1.93743e+07	0.356713	2.40056e+06	662234	662234	0	0	0	0	0	1.73833e+06	662234	2.68059e+06	53900.1	2.62669e+06	1.73833e+06	888359	13712.9	874646	662234	212411	662234	0	0	0	212411	212411	0	535949	126286	535398	550.923	1.24697e+06	491359	2.46818e+06	9432.39	6865.34	2567.05	1134.75	474.089	660.659	64518.3
Min	Malawi	MWI	LIC	Africa	Sub-Saharan Africa	Eastern Africa	Other Africa	1.93743e+07	0.356713	2.14443e+06	591995	591995	0	0	0	0	0	1.54752e+06	591995	2.42912e+06	47868.8	2.38085e+06	1.54752e+06	793063	11231	781832	591995	166828	591995	0	0	0	166828	166828	0	459049	92163.2	458505	403.117	1.08109e+06	393795	2.20518e+06	8356.45	6085.39	2269.6	840.159	348.252	472.805	47733.3
Lower quartile	Malawi	MWI	LIC	Africa	Sub-Saharan Africa	Eastern Africa	Other Africa	1.93743e+07	0.356713	2.35295e+06	645616	645616	0	0	0	0	0	1.70223e+06	645616	2.62931e+06	52768.6	2.57638e+06	1.70223e+06	868308	13150.3	855040	645616	201017	645616	0	0	0	201017	201017	0	521140	118398	520573	514.921	1.21533e+06	470455	2.41913e+06	9226.12	6717.2	2509.46	1062.16	441.362	617.188	60201.7
Median	Malawi	MWI	LIC	Africa	Sub-Saharan Africa	Eastern Africa	Other Africa	1.93743e+07	0.356713	2.39824e+06	661510	661510	0	0	0	0	0	1.73693e+06	661510	2.67854e+06	53846	2.6246e+06	1.73693e+06	887546	13675.2	873828	661510	211418	661510	0	0	0	211418	211418	0	535673	125838	535101	547.555	1.24575e+06	490749	2.46555e+06	9426.09	6857.8	2565.48	1126.33	469.663	655.604	63908.7
Upper quartile	Malawi	MWI	LIC	Africa	Sub-Saharan Africa	Eastern Africa	Other Africa	1.93743e+07	0.356713	2.44842e+06	678247	678247	0	0	0	0	0	1.77491e+06	678247	2.73083e+06	55034.1	2.67606e+06	1.77491e+06	907610	14250.2	893614	678247	222685	678247	0	0	0	222685	222685	0	550363	133845	549796	583.351	1.27696e+06	512157	2.51753e+06	9635.89	7012.29	2622.84	1198.66	501.968	698.955	68197.1
Max	Malawi	MWI	LIC	Africa	Sub-Saharan Africa	Eastern Africa	Other Africa	1.93743e+07	0.356713	2.64326e+06	758593	758593	0	0	0	0	0	1.92418e+06	758593	2.9564e+06	60023.5	2.89728e+06	1.92418e+06	1.00932e+06	16971	994206	758593	268074	758593	0	0	0	268074	268074	0	618054	168940	617404	780.274	1.43214e+06	594610	2.71596e+06	10677.4	7760.41	2917.01	1589.31	731.083	924.695	89670.4
Mean	Malaysia	MYS	UMC	Asia	South-eastern Asia	NA	Other non-OECD Asia	3.31534e+07	0.179191	1.08859e+07	9.37646e+06	9.20064e+06	175819	9.14682	0	175828	9.15218e+06	1.50941e+06	48454.7	1.19312e+07	38232.6	1.18929e+07	1.50941e+06	1.03835e+07	32549	1.0351e+07	9.20064e+06	1.15032e+06	48454.7	9.15218e+06	9.14682	0	1.15031e+06	974496	175819	39202.4	9252.3	39162.2	40.2017	497422	1.01199e+06	1.62864e+06	6689.83	4869.18	1820.64	4188.94	1858.15	2330.78	296293
Min	Malaysia	MYS	UMC	Asia	South-eastern Asia	NA	Other non-OECD Asia	3.31534e+07	0.179191	9.89039e+06	8.4165e+06	8.23532e+06	64624.1	0	0	64624.1	8.19278e+06	1.20929e+06	35287.8	1.08137e+07	34364.2	1.07792e+07	1.20929e+06	9.35112e+06	26868.6	9.32004e+06	8.23532e+06	761930	35287.8	8.19278e+06	0	0	761930	635340	64624.1	27899.2	6222.06	27868.8	25.963	357964	791063	1.32915e+06	6008.76	4378.53	1628	3244.93	1435.33	1799.33	179687
Lower quartile	Malaysia	MYS	UMC	Asia	South-eastern Asia	NA	Other non-OECD Asia	3.31534e+07	0.179191	1.0682e+07	9.17733e+06	9.00273e+06	127609	0	0	127622	8.95459e+06	1.42226e+06	45830	1.17112e+07	37381.4	1.16735e+07	1.42226e+06	1.01704e+07	31310.9	1.01382e+07	9.00273e+06	1.05979e+06	45830	8.95459e+06	0	0	1.05978e+06	894188	127609	36971.4	8467.91	36932.7	36.7713	460832	953303	1.541e+06	6536.03	4757.6	1778.41	3984.14	1766.36	2216.75	266644
Median	Malaysia	MYS	UMC	Asia	South-eastern Asia	NA	Other non-OECD Asia	3.31534e+07	0.179191	1.08726e+07	9.35637e+06	9.18166e+06	167193	0	0	167229	9.13284e+06	1.50027e+06	48440.9	1.19211e+07	38217.5	1.18838e+07	1.50027e+06	1.03703e+07	32511.8	1.03373e+07	9.18166e+06	1.14148e+06	48440.9	9.13284e+06	0	0	1.14148e+06	969225	167193	39175.6	9183.9	39135.7	39.9826	492488	1.00709e+06	1.61978e+06	6687.65	4866.69	1819.86	4177.24	1853.56	2323.63	292817
Upper quartile	Malaysia	MYS	UMC	Asia	South-eastern Asia	NA	Other non-OECD Asia	3.31534e+07	0.179191	1.10817e+07	9.56444e+06	9.3919e+06	213314	0	0	213314	9.34237e+06	1.58544e+06	51060.7	1.21447e+07	39052.6	1.21058e+07	1.58544e+06	1.05841e+07	33732.9	1.05514e+07	9.3919e+06	1.23486e+06	51060.7	9.34237e+06	0	0	1.23486e+06	1.04707e+06	213314	41377.7	9947.19	41334.1	43.3384	528822	1.06287e+06	1.70524e+06	6838.68	4978.48	1861.85	4376.76	1944.74	2436.05	322414
Max	Malaysia	MYS	UMC	Asia	South-eastern Asia	NA	Other non-OECD Asia	3.31534e+07	0.179191	1.20217e+07	1.05e+07	1.03664e+07	429651	1024.35	0	429651	1.03165e+07	2.0078e+06	64125.1	1.31878e+07	43332.2	1.31472e+07	2.0078e+06	1.16255e+07	39907.2	1.15936e+07	1.03664e+07	1.70455e+06	64125.1	1.03165e+07	1024.35	0	1.70455e+06	1.44921e+06	429651	51765.4	13641.8	51718.1	63.4608	744197	1.33932e+06	2.14073e+06	7650.55	5584.21	2080.82	5592.65	2522.86	3069.79	528928
Mean	Mayotte	MYT	HIC	Africa	Sub-Saharan Africa	Eastern Africa	Other Africa	305238	0.0724072	108823	83626.4	83315.7	310.759	0	0	310.759	83150	25196.9	165.698	119622	406.238	119216	25196.9	94018.8	306.958	93711.8	83315.7	10396.1	165.698	83150	0	0	10396.1	10085.4	310.759	134.17	31.5278	134.032	0.137862	9381.46	15815.5	26075.8	71.0989	51.7482	19.3507	35.5672	15.7919	19.7753	3064.87
Min	Mayotte	MYT	HIC	Africa	Sub-Saharan Africa	Eastern Africa	Other Africa	305238	0.0724072	63579.3	42258.3	42187.9	0	0	0	0	42045.4	6253.4	36.9846	75238.5	247.966	74953.9	6253.4	52205.2	160.126	52026.3	42187.9	4548.15	36.9846	42045.4	0	0	4548.15	4391.95	0	29.8675	4.01557	29.838	0.0210914	1923.22	4024.21	7123.55	43.5982	31.6791	11.919	14.372	6.19448	7.91141	1109.12
Lower quartile	Mayotte	MYT	HIC	Africa	Sub-Saharan Africa	Eastern Africa	Other Africa	305238	0.0724072	99980.7	73823.3	73597.6	142.172	0	0	142.172	73449.5	17803.6	123.247	110652	368.32	110239	17803.6	84148.9	269.806	83841.4	73597.6	8729.16	123.247	73449.5	0	0	8729.16	8424.87	142.172	98.7671	20.0515	98.6847	0.0868378	6330.14	11261.9	18692.6	64.3143	46.8258	17.498	30.1997	13.3692	16.7603	2471.28
Median	Mayotte	MYT	HIC	Africa	Sub-Saharan Africa	Eastern Africa	Other Africa	305238	0.0724072	108976	83182.7	82914.8	248.205	0	0	248.205	82734.3	23663.3	157.86	119669	400.952	119251	23663.3	93693.2	302.82	93402.6	82914.8	10149	157.86	82734.3	0	0	10149	9832.23	248.205	127.008	28.0562	126.891	0.122509	8656.95	14826.6	24582.5	70.2699	51.1847	19.1317	34.9261	15.5049	19.3794	2944.96
Upper quartile	Mayotte	MYT	HIC	Africa	Sub-Saharan Africa	Eastern Africa	Other Africa	305238	0.0724072	117478	92990.8	92558.6	403.653	0	0	403.653	92381.4	30847.8	199.891	128364	439.926	127943	30847.8	103578	340.805	103264	92558.6	11817.9	199.891	92381.4	0	0	11817.9	11474.7	403.653	161.505	39.5516	161.325	0.171174	11585.4	19256.7	31794.6	77.1299	56.0846	21.0304	40.3694	17.9198	22.3399	3530.93
Max	Mayotte	MYT	HIC	Africa	Sub-Saharan Africa	Eastern Africa	Other Africa	305238	0.0724072	149499	130725	129336	2025.06	0	0	2025.06	129070	71122	475.944	163106	697.157	162653	71122	144269	518.863	143831	129336	19796.1	475.944	129070	0	0	19796.1	19316	2025.06	395.89	123.208	395.504	0.617456	33776.1	46674.6	71966.8	122.589	90.1852	32.404	73.9624	33.2456	42.7212	7616.09
Mean	Namibia	NAM	UMC	Africa	Sub-Saharan Africa	Southern Africa	Other Africa	2.48953e+06	0.588166	758014	500998	500993	0	5.32738	0	5.32738	61950.1	257016	439043	801256	6161.07	795095	257016	538079	2833.24	535245	500993	34252.8	439043	61950.1	5.32738	0	34247.4	34247.4	0	355364	83678.6	355000	364.363	60017.4	196999	705053	1078.04	784.626	293.41	310.465	136.279	174.186	10367.9
Min	Namibia	NAM	UMC	Africa	Sub-Saharan Africa	Southern Africa	Other Africa	2.48953e+06	0.588166	584104	365114	365114	0	0	0	0	32096.5	196971	318553	627571	4859.19	622384	196971	402053	1907.11	399572	365114	16677.4	318553	32096.5	0	0	16677.4	16677.4	0	246895	43376.9	246662	172.339	41449.1	146451	544980	845.922	615.424	230.498	187.735	83.7735	103.961	4562.3
Lower quartile	Namibia	NAM	UMC	Africa	Sub-Saharan Africa	Southern Africa	Other Africa	2.48953e+06	0.588166	719427	469257	469257	0	0	0	0	54968.9	243826	407620	761800	5870.72	755703	243826	505105	2623.39	502374	469257	28141.5	407620	54968.9	0	0	28141.5	28141.5	0	327317	70124	326950	303.335	55758.8	186669	667280	1026.48	747.401	279.22	279.474	121.852	155.579	8296.66
Median	Namibia	NAM	UMC	Africa	Sub-Saharan Africa	Southern Africa	Other Africa	2.48953e+06	0.588166	753683	496304	496304	0	0	0	0	61475.2	256569	434104	797342	6143.95	791042	256569	533584	2802.29	530784	496304	32883.1	434104	61475.2	0	0	32881.3	32881.3	0	350203	80456.2	349881	350.125	59718.5	196429	700383	1074.61	782.064	292.555	304.77	133.8	170.842	9765.33
Upper quartile	Namibia	NAM	UMC	Africa	Sub-Saharan Africa	Southern Africa	Other Africa	2.48953e+06	0.588166	792569	529241	529241	0	0	0	0	68338.2	269535	466707	837539	6439.77	831012	269535	567716	3010.59	564798	529241	38852	466707	68338.2	0	0	38852	38852	0	379403	93777.9	379008	409.078	63961.8	206732	739698	1127.18	820.349	306.759	335.962	147.608	188.695	11696.8
Max	Namibia	NAM	UMC	Africa	Sub-Saharan Africa	Southern Africa	Other Africa	2.48953e+06	0.588166	975272	686572	686572	0	451.13	0	451.13	103304	333398	604467	1.01891e+06	7957.8	1.01095e+06	333398	711855	4500.03	708170	686572	69452.6	604467	103304	451.13	0	69452.6	69452.6	0	522556	189717	521965	937.792	85775.1	256045	912282	1397.51	1011.73	385.774	535.067	248.423	350.36	28788.6
Mean	New Caledonia	NCL	HIC	Oceania	Melanesia	NA	Other non-OECD Asia	285755	0.344136	181146	180684	162014	18670.7	0	0	18670.7	162014	461.99	0	181538	139.519	181399	461.99	180937	145.276	180791	162014	18777.7	0	162014	0	0	18777.7	107.023	18670.7	0	0	0	0	300.509	161.481	746.786	24.4228	17.7767	6.64616	18.2634	11.3168	6.94663	2.45425
Min	New Caledonia	NCL	HIC	Oceania	Melanesia	NA	Other non-OECD Asia	285755	0.344136	41614.2	41614.2	35528.4	0	0	0	0	35528.4	0	0	41863.6	31.9954	41817	0	41817	24.9924	41755.5	35528.4	31.1363	0	35528.4	0	0	31.1363	31.1363	0	0	0	0	0	0	0	78.8328	5.43776	3.93608	1.50167	2.16963	1.16562	0.705004	0.0921821
Lower quartile	New Caledonia	NCL	HIC	Oceania	Melanesia	NA	Other non-OECD Asia	285755	0.344136	131633	131241	116588	2496.37	0	0	2496.37	116588	0	0	131909	102.847	131795	0	131446	91.501	131342	116588	2594.19	0	116588	0	0	2594.19	69.6182	2496.37	0	0	0	0	0	0	246.399	17.9948	13.0728	4.88104	10.8066	6.57281	3.99434	1.31811
Median	New Caledonia	NCL	HIC	Oceania	Melanesia	NA	Other non-OECD Asia	285755	0.344136	179514	179097	156779	9814.1	0	0	9814.1	156779	0	0	179932	134.236	179793	0	179348	130.509	179171	156779	9919.8	0	156779	0	0	9919.8	106.945	9814.1	0	0	0	0	0	0	366.555	23.4922	17.0864	6.3404	15.8131	9.63082	5.89724	2.20622
Upper quartile	New Caledonia	NCL	HIC	Oceania	Melanesia	NA	Other non-OECD Asia	285755	0.344136	230737	230243	204292	28233	0	0	28233	204292	399.425	0	231244	169.748	231099	399.425	230510	183.4	230382	204292	28311.8	0	204292	0	0	28311.8	143.626	28233	0	0	0	0	246.998	108.478	688.692	29.6773	21.6014	8.11808	22.6935	13.959	8.74798	3.36462
Max	New Caledonia	NCL	HIC	Oceania	Melanesia	NA	Other non-OECD Asia	285755	0.344136	326044	325913	320331	129256	0	0	129256	320331	6459.27	0	326901	373.374	326616	6459.27	326485	540.251	326027	320331	129372	0	320331	0	0	129372	194.862	129256	0	0	0	0	6142.56	3583.59	7105.04	68.9605	50.1259	18.8346	93.7618	68.6725	40.209	7.73874
Mean	Niger	NER	LIC	Africa	Sub-Saharan Africa	Western Africa	Other Africa	2.43371e+07	0.498651	2.30472e+06	949068	949056	0	11.9297	0	11.9297	0	1.35565e+06	949056	2.57284e+06	43916.1	2.52892e+06	1.35565e+06	1.17327e+06	16391.1	1.15688e+06	949056	207823	949056	0	11.9297	0	207811	207811	0	767201	181856	766414	787.001	1.00547e+06	350183	2.36502e+06	7685.7	5594.09	2091.61	1182.61	493.933	688.677	63098
Min	Niger	NER	LIC	Africa	Sub-Saharan Africa	Western Africa	Other Africa	2.43371e+07	0.498651	1.90726e+06	705010	704998	0	11.9297	0	11.9297	0	1.08064e+06	704998	2.14606e+06	35165.7	2.10831e+06	1.08064e+06	914907	11599.8	903307	704998	152041	704998	0	11.9297	0	152029	152029	0	548537	107756	548028	429.186	786439	251982	1.95916e+06	6208.84	4525.69	1670.39	703.23	294.804	388.861	41660
Lower quartile	Niger	NER	LIC	Africa	Sub-Saharan Africa	Western Africa	Other Africa	2.43371e+07	0.498651	2.21604e+06	893957	893945	0	11.9297	0	11.9297	0	1.29511e+06	893945	2.48054e+06	42049.5	2.43834e+06	1.29511e+06	1.11634e+06	15232.7	1.10106e+06	893945	194083	893945	0	11.9297	0	194071	194071	0	719415	161368	718706	698.783	958579	327047	2.27444e+06	7353.45	5351.99	1999.63	1047.61	433.914	606.617	57771.4
Median	Niger	NER	LIC	Africa	Sub-Saharan Africa	Western Africa	Other Africa	2.43371e+07	0.498651	2.30032e+06	945519	945507	0	11.9297	0	11.9297	0	1.35049e+06	945507	2.56783e+06	43784	2.52374e+06	1.35049e+06	1.1697e+06	16281.2	1.15325e+06	945507	206309	945507	0	11.9297	0	206297	206297	0	764296	178790	763614	773.296	1.00078e+06	347875	2.36046e+06	7663.28	5576.35	2084.87	1164.23	484.811	674.257	62394.7
Upper quartile	Niger	NER	LIC	Africa	Sub-Saharan Africa	Western Africa	Other Africa	2.43371e+07	0.498651	2.38889e+06	999819	999808	0	11.9297	0	11.9297	0	1.41329e+06	999808	2.6588e+06	45656.3	2.61357e+06	1.41329e+06	1.22628e+06	17482.7	1.2089e+06	999808	220510	999808	0	11.9297	0	220498	220498	0	811873	199407	811024	858.942	1.05012e+06	371403	2.45051e+06	7996.83	5815.04	2176.45	1294.06	543.484	756.931	67790.3
Max	Niger	NER	LIC	Africa	Sub-Saharan Africa	Western Africa	Other Africa	2.43371e+07	0.498651	2.80959e+06	1.25938e+06	1.25937e+06	0	11.9297	0	11.9297	0	1.74391e+06	1.25937e+06	3.09752e+06	56360.6	3.04663e+06	1.74391e+06	1.48646e+06	23842.5	1.46404e+06	1.25937e+06	286861	1.25937e+06	0	11.9297	0	286849	286849	0	1.00696e+06	311952	1.00598e+06	1399.48	1.32529e+06	491381	2.87839e+06	9946.38	7272.31	2674.07	2182.15	973.376	1345.66	95520.9
Mean	Norfolk Island	NFK	HIC	Oceania	Australia and New Zealand	NA	OECD Oceania	2145.57	1	1411.29	1411.29	1090.55	320.738	0	0	320.738	1090.55	0	0	1415.13	1.95827	1413.17	0	1413.17	1.88252	1411.29	1090.55	320.738	0	1090.55	0	0	320.738	0	320.738	0	0	0	0	0	0	3.84079	0.342717	0.249437	0.0932803	0.222021	0.137532	0.0844889	0
Min	Norfolk Island	NFK	HIC	Oceania	Australia and New Zealand	NA	OECD Oceania	2145.57	1	70.4821	70.4821	53.2563	0	0	0	0	53.2563	0	0	70.5844	0.0505174	70.5339	0	70.5339	0.0518284	70.4821	53.2563	0	0	53.2563	0	0	0	0	0	0	0	0	0	0	0	0.102346	0.00847911	0.00596654	0.00251257	0.00349842	0.00201577	0.000995728	0
Lower quartile	Norfolk Island	NFK	HIC	Oceania	Australia and New Zealand	NA	OECD Oceania	2145.57	1	955.424	955.424	704.684	123.248	0	0	123.248	704.684	0	0	962.186	1.10527	959.481	0	959.481	0.864849	955.424	704.684	123.248	0	704.684	0	0	123.248	0	123.248	0	0	0	0	0	0	2.0394	0.191427	0.13922	0.0521152	0.0862959	0.0514884	0.0307713	0
Median	Norfolk Island	NFK	HIC	Oceania	Australia and New Zealand	NA	OECD Oceania	2145.57	1	1307.83	1307.83	1008.26	267.746	0	0	267.746	1008.26	0	0	1309.54	1.67909	1308.38	0	1308.38	1.49495	1307.83	1008.26	267.746	0	1008.26	0	0	267.746	0	267.746	0	0	0	0	0	0	3.23645	0.293019	0.212982	0.0799952	0.158832	0.0972131	0.0579906	0
Upper quartile	Norfolk Island	NFK	HIC	Oceania	Australia and New Zealand	NA	OECD Oceania	2145.57	1	1926.51	1926.51	1423.46	465.332	0	0	465.332	1423.46	0	0	1930.59	2.50584	1928.2	0	1928.2	2.45532	1926.51	1423.46	465.332	0	1423.46	0	0	465.332	0	465.332	0	0	0	0	0	0	4.9047	0.439643	0.318922	0.118994	0.287003	0.175483	0.108555	0
Max	Norfolk Island	NFK	HIC	Oceania	Australia and New Zealand	NA	OECD Oceania	2145.57	1	2936.75	2936.75	2870.38	1349.06	0	0	1349.06	2870.38	0	0	2942.7	9.26048	2938.57	0	2938.57	12.9796	2936.75	2870.38	1349.06	0	2870.38	0	0	1349.06	0	1349.06	0	0	0	0	0	0	19.2537	1.48554	1.09991	0.419092	2.38674	1.27725	1.13974	0
Mean	Nigeria	NGA	LMC	Africa	Sub-Saharan Africa	Western Africa	Other Africa	2.08261e+08	0.197262	4.296e+07	1.78492e+07	1.7849e+07	0	195.004	0	195.004	0	2.51108e+07	1.7849e+07	4.8441e+07	402569	4.80384e+07	2.51108e+07	2.29276e+07	182121	2.27455e+07	1.7849e+07	4.89649e+06	1.7849e+07	0	195.004	0	4.8963e+06	4.8963e+06	0	1.44399e+07	3.40911e+06	1.44251e+07	14820.4	1.42238e+07	1.08869e+07	4.35445e+07	70439.4	51267.7	19171.7	22656.8	9211.75	13445	1.48642e+06
Min	Nigeria	NGA	LMC	Africa	Sub-Saharan Africa	Western Africa	Other Africa	2.08261e+08	0.197262	4.16187e+07	1.7022e+07	1.70211e+07	0	0	0	0	0	2.39258e+07	1.70211e+07	4.68847e+07	380898	4.64912e+07	2.39258e+07	2.1745e+07	165573	2.15731e+07	1.70211e+07	4.17872e+06	1.70211e+07	0	0	0	4.17872e+06	4.17872e+06	0	1.32408e+07	2.76846e+06	1.32266e+07	12275	1.24993e+07	9.40731e+06	4.22004e+07	66652.4	48517.5	18134.9	18378.5	7713.89	10664.6	1.20965e+06
Lower quartile	Nigeria	NGA	LMC	Africa	Sub-Saharan Africa	Western Africa	Other Africa	2.08261e+08	0.197262	4.26744e+07	1.76714e+07	1.76711e+07	0	0	0	0	0	2.49049e+07	1.76711e+07	4.80988e+07	397741	4.76987e+07	2.49049e+07	2.26728e+07	177800	2.24929e+07	1.76711e+07	4.71086e+06	1.76711e+07	0	0	0	4.71082e+06	4.71082e+06	0	1.42421e+07	3.23469e+06	1.42273e+07	14013.2	1.38275e+07	1.04914e+07	4.32557e+07	69569.3	50632.3	18928.1	21478	8800.33	12660.8	1.42174e+06
Median	Nigeria	NGA	LMC	Africa	Sub-Saharan Africa	Western Africa	Other Africa	2.08261e+08	0.197262	4.29571e+07	1.78453e+07	1.78442e+07	0	0	0	0	0	2.51095e+07	1.78442e+07	4.84285e+07	402272	4.80255e+07	2.51095e+07	2.29079e+07	181668	2.2726e+07	1.78442e+07	4.85967e+06	1.78442e+07	0	0	0	4.85953e+06	4.85953e+06	0	1.44499e+07	3.37833e+06	1.44348e+07	14666.8	1.42369e+07	1.08863e+07	4.35427e+07	70387.1	51223.9	19157.8	22414.3	9145.07	13277.9	1.47132e+06
Upper quartile	Nigeria	NGA	LMC	Africa	Sub-Saharan Africa	Western Africa	Other Africa	2.08261e+08	0.197262	4.32353e+07	1.80237e+07	1.80234e+07	0	59.6088	0	59.6088	0	2.53136e+07	1.80234e+07	4.87713e+07	407106	4.83674e+07	2.53136e+07	2.31638e+07	185959	2.29799e+07	1.80234e+07	5.05064e+06	1.80234e+07	0	59.6088	0	5.05036e+06	5.05036e+06	0	1.46553e+07	3.55688e+06	1.46395e+07	15480.1	1.46148e+07	1.12788e+07	4.3824e+07	71255.5	51868.2	19393.6	23609.5	9557.16	14072.2	1.53365e+06
Max	Nigeria	NGA	LMC	Africa	Sub-Saharan Africa	Western Africa	Other Africa	2.08261e+08	0.197262	4.45163e+07	1.88231e+07	1.88231e+07	0	4276.33	0	4276.33	0	2.62205e+07	1.88231e+07	5.01954e+07	427023	4.97838e+07	2.62205e+07	2.43193e+07	208471	2.41322e+07	1.88231e+07	6.05458e+06	1.88231e+07	0	4276.33	0	6.05309e+06	6.05309e+06	0	1.5455e+07	4.40475e+06	1.54398e+07	20166.6	1.59419e+07	1.25693e+07	4.51034e+07	75173.9	54786.2	20478.9	30490.4	12069.1	18556.3	2.14291e+06
Mean	Nicaragua	NIC	LMC	Americas	Latin America and the Caribbean	Central America	Latin America	6.75123e+06	0.355804	1.88526e+06	1.12195e+06	1.12195e+06	0	3.4867	0	3.4867	0	763309	1.12195e+06	2.03884e+06	16858.5	2.02198e+06	763309	1.25867e+06	9681.74	1.24899e+06	1.12195e+06	127046	1.12195e+06	0	3.4867	0	127043	127043	0	909106	212840	908173	932.735	427398	335911	1.9118e+06	2950.57	2147.37	803.194	935.576	391.221	544.355	38689.4
Min	Nicaragua	NIC	LMC	Americas	Latin America and the Caribbean	Central America	Latin America	6.75123e+06	0.355804	1.62059e+06	935056	935056	0	0	0	0	0	586557	935056	1.76755e+06	13488.5	1.75156e+06	586557	1.06062e+06	6189.55	1.0516e+06	935056	72446	935056	0	0	0	72446	72446	0	581611	86560.7	580958	375.681	286845	212509	1.64525e+06	2347.63	1704.66	642.974	551.898	230.759	302.435	20069.1
Lower quartile	Nicaragua	NIC	LMC	Americas	Latin America and the Caribbean	Central America	Latin America	6.75123e+06	0.355804	1.83655e+06	1.0829e+06	1.08286e+06	0	0	0	0	0	724736	1.08286e+06	1.98587e+06	16131.9	1.96932e+06	724736	1.21554e+06	8683.22	1.20601e+06	1.08286e+06	108355	1.08286e+06	0	0	0	108355	108355	0	860167	163329	859258	715.509	394961	305886	1.86233e+06	2818.75	2050.85	767.715	840.796	347.613	486.65	32083.8
Median	Nicaragua	NIC	LMC	Americas	Latin America and the Caribbean	Central America	Latin America	6.75123e+06	0.355804	1.88152e+06	1.11977e+06	1.11976e+06	0	0	0	0	0	761321	1.11976e+06	2.03512e+06	16803.8	2.01861e+06	761321	1.25547e+06	9518.48	1.24575e+06	1.11976e+06	122281	1.11976e+06	0	0	0	122281	122281	0	913954	202962	913047	874.649	425520	335531	1.90814e+06	2943.26	2142.19	801.129	923.558	384.604	534.691	36775.1
Upper quartile	Nicaragua	NIC	LMC	Americas	Latin America and the Caribbean	Central America	Latin America	6.75123e+06	0.355804	1.93213e+06	1.15926e+06	1.15926e+06	0	0	0	0	0	800091	1.15926e+06	2.08997e+06	17560.3	2.07255e+06	800091	1.2997e+06	10506.6	1.28942e+06	1.15926e+06	141441	1.15926e+06	0	0	0	141441	141441	0	963908	253135	963092	1091.65	458739	363468	1.95957e+06	3072.1	2235.68	837.338	1021.02	426.794	593.405	43305.3
Max	Nicaragua	NIC	LMC	Americas	Latin America and the Caribbean	Central America	Latin America	6.75123e+06	0.355804	2.14526e+06	1.3354e+06	1.3354e+06	0	292.718	0	292.718	0	965212	1.3354e+06	2.31065e+06	20823.8	2.29216e+06	965212	1.48803e+06	16059.7	1.47768e+06	1.3354e+06	249827	1.3354e+06	0	292.718	0	249827	249827	0	1.15536e+06	489090	1.15377e+06	2353.71	639288	509928	2.1748e+06	3666.74	2679.04	987.694	1603.01	703.123	949.669	95718.6
Mean	Niue	NIU	UMC	Oceania	Polynesia	NA	Other non-OECD Asia	1941.55	1	586.842	295.521	294.272	1.24981	0	0	1.24981	284.012	291.321	10.2598	596.469	7.08558	589.384	291.321	298.063	2.54139	295.521	294.272	1.24981	10.2598	284.012	0	0	1.24981	0	1.24981	8.32324	1.93651	8.31465	0.00859233	51.7242	239.597	311.208	1.24062	0.902565	0.338055	0.259319	0.115393	0.143927	0
Min	Niue	NIU	UMC	Oceania	Polynesia	NA	Other non-OECD Asia	1941.55	1	0	0	0	0	0	0	0	0	0	0	0	0	0	0	0	0	0	0	0	0	0	0	0	0	0	0	0	0	0	0	0	0	0	0	0	0	0	0	0	0
Lower quartile	Niue	NIU	UMC	Oceania	Polynesia	NA	Other non-OECD Asia	1941.55	1	311.812	153.176	152.306	0	0	0	0	147.409	152.074	2.83957	316.698	3.72984	312.931	152.074	154.347	1.06159	153.176	152.306	0	2.83957	147.409	0	0	0	0	0	2.19009	0.319264	2.18838	0.00141114	23.321	124.657	163.496	0.646719	0.470979	0.17649	0.0736954	0.0323858	0.0411694	0
Median	Niue	NIU	UMC	Oceania	Polynesia	NA	Other non-OECD Asia	1941.55	1	510.239	253.766	252.435	0	0	0	0	242.437	250.082	6.84974	517.843	6.08614	511.92	250.082	255.895	1.93494	253.766	252.435	0	6.84974	242.437	0	0	0	0	0	5.44797	0.981998	5.44427	0.00412864	40.9205	204.6	266.644	1.07082	0.775888	0.290872	0.16294	0.0729535	0.0902387	0
Upper quartile	Niue	NIU	UMC	Oceania	Polynesia	NA	Other non-OECD Asia	1941.55	1	807.878	406.122	404.254	0.350557	0	0	0.350557	391.59	401.977	14.1403	823.938	9.83797	814.557	401.977	409.031	3.38132	406.122	404.254	0.350557	14.1403	391.59	0	0	0.350557	0	0.350557	11.5412	2.44703	11.5287	0.0105243	68.794	329.168	428.538	1.71461	1.24746	0.468974	0.332181	0.149086	0.183459	0
Max	Niue	NIU	UMC	Oceania	Polynesia	NA	Other non-OECD Asia	1941.55	1	2182.69	1100.41	1090.03	27.98	0	0	27.98	1084.47	1243.01	72.3007	2220.39	28.5338	2193.77	1243.01	1107.37	17.4023	1100.41	1090.03	27.98	72.3007	1084.47	0	0	27.98	0	27.98	57.4421	27.2203	57.4248	0.140565	288.565	1015.73	1317.43	5.21753	3.717	1.52596	3.95686	1.86065	2.0962	0
Mean	Netherlands	NLD	HIC	Europe	Western Europe	NA	OECD EU countries	1.74215e+07	0.157462	7.73914e+06	7.73914e+06	2.84501e+06	1.71628e+06	477430	2.70042e+06	4.89413e+06	2.84501e+06	0	0	7.75546e+06	4578.09	7.75088e+06	0	7.75088e+06	3368.55	7.74751e+06	2.84501e+06	4.9025e+06	0	2.84501e+06	477430	2.70042e+06	1.72465e+06	8371.94	1.71628e+06	0	0	0	0	0	0	7946.64	801.035	583.034	218.001	372.728	229.991	142.737	192.469
Min	Netherlands	NLD	HIC	Europe	Western Europe	NA	OECD EU countries	1.74215e+07	0.157462	7.25445e+06	7.25445e+06	2.18037e+06	1.45094e+06	291961	2.06877e+06	4.19724e+06	2.18037e+06	0	0	7.2707e+06	4087.35	7.26635e+06	0	7.26635e+06	2936.27	7.2632e+06	2.18037e+06	4.20582e+06	0	2.18037e+06	291961	2.06877e+06	1.45957e+06	7237.76	1.45094e+06	0	0	0	0	0	0	7113.07	716.669	521.264	195.405	312.194	192.518	119.676	152.185
Lower quartile	Netherlands	NLD	HIC	Europe	Western Europe	NA	OECD EU countries	1.74215e+07	0.157462	7.64574e+06	7.64574e+06	2.71801e+06	1.66055e+06	440822	2.58193e+06	4.75765e+06	2.71801e+06	0	0	7.66201e+06	4482.6	7.65751e+06	0	7.65751e+06	3276.65	7.65422e+06	2.71801e+06	4.76617e+06	0	2.71801e+06	440822	2.58193e+06	1.66912e+06	8127.09	1.66055e+06	0	0	0	0	0	0	7773.38	784.038	570.59	213.332	360.41	222.195	137.792	184.804
Median	Netherlands	NLD	HIC	Europe	Western Europe	NA	OECD EU countries	1.74215e+07	0.157462	7.73617e+06	7.73617e+06	2.83654e+06	1.71522e+06	474406	2.70064e+06	4.89348e+06	2.83654e+06	0	0	7.75244e+06	4575.08	7.74778e+06	0	7.74778e+06	3361.75	7.74447e+06	2.83654e+06	4.90177e+06	0	2.83654e+06	474406	2.70064e+06	1.72371e+06	8371.45	1.71522e+06	0	0	0	0	0	0	7938.93	800.458	582.638	217.841	372.034	229.566	142.514	191.826
Upper quartile	Netherlands	NLD	HIC	Europe	Western Europe	NA	OECD EU countries	1.74215e+07	0.157462	7.83158e+06	7.83158e+06	2.96458e+06	1.76992e+06	510578	2.81693e+06	5.03096e+06	2.96458e+06	0	0	7.84826e+06	4669	7.84362e+06	0	7.84362e+06	3456.3	7.84025e+06	2.96458e+06	5.0395e+06	0	2.96458e+06	510578	2.81693e+06	1.77817e+06	8613.22	1.76992e+06	0	0	0	0	0	0	8107.85	817.128	594.676	222.46	384.451	237.235	147.322	200.023
Max	Netherlands	NLD	HIC	Europe	Western Europe	NA	OECD EU countries	1.74215e+07	0.157462	8.22594e+06	8.22594e+06	3.44471e+06	2.00028e+06	702586	3.37557e+06	5.63094e+06	3.44471e+06	0	0	8.24333e+06	5116.06	8.23835e+06	0	8.23835e+06	4078.3	8.23469e+06	3.44471e+06	5.6393e+06	0	3.44471e+06	702586	3.37557e+06	2.00897e+06	9585.78	2.00028e+06	0	0	0	0	0	0	8992.16	895.916	651.417	244.499	450.609	279.74	172.699	232.341
Mean	Norway	NOR	HIC	Europe	Northern Europe	NA	OECD Non-EU countries	5.25027e+06	0.352915	2.26839e+06	2.26839e+06	588392	739156	8713.8	932124	1.67999e+06	588392	0	0	2.27398e+06	2154.48	2.27183e+06	0	2.27183e+06	1504.05	2.27032e+06	588392	1.68193e+06	0	588392	8713.8	932124	741092	1936.69	739156	0	0	0	0	0	0	3658.53	377.017	274.411	102.606	148.683	91.7175	56.9652	44.5361
Min	Norway	NOR	HIC	Europe	Northern Europe	NA	OECD Non-EU countries	5.25027e+06	0.352915	2.03154e+06	2.03154e+06	437807	629512	141.61	744180	1.44059e+06	437807	0	0	2.03679e+06	1838.98	2.0349e+06	0	2.0349e+06	1218.12	2.03358e+06	437807	1.44252e+06	0	437807	141.61	744180	631655	1374.45	629512	0	0	0	0	0	0	3071.89	322.605	235.069	87.5359	117.086	72.5376	44.5489	28.9298
Lower quartile	Norway	NOR	HIC	Europe	Northern Europe	NA	OECD Non-EU countries	5.25027e+06	0.352915	2.22343e+06	2.22343e+06	554263	716999	4968.86	898207	1.63455e+06	554263	0	0	2.22904e+06	2090.06	2.22687e+06	0	2.22687e+06	1445.93	2.22537e+06	554263	1.63637e+06	0	554263	4968.86	898207	718967	1801.51	716999	0	0	0	0	0	0	3544.27	365.584	266.08	99.4843	142.328	87.6818	54.3873	40.1618
Median	Norway	NOR	HIC	Europe	Northern Europe	NA	OECD Non-EU countries	5.25027e+06	0.352915	2.2683e+06	2.2683e+06	586309	738521	7967.99	930852	1.67809e+06	586309	0	0	2.27394e+06	2153.16	2.27183e+06	0	2.27183e+06	1500.43	2.27032e+06	586309	1.68e+06	0	586309	7967.99	930852	740474	1935.87	738521	0	0	0	0	0	0	3655.33	376.904	274.387	102.555	148.358	91.441	56.8412	43.9149
Upper quartile	Norway	NOR	HIC	Europe	Northern Europe	NA	OECD Non-EU countries	5.25027e+06	0.352915	2.31148e+06	2.31148e+06	620518	760910	11671.7	964578	1.72308e+06	620518	0	0	2.31742e+06	2216.58	2.3152e+06	0	2.3152e+06	1557.99	2.3136e+06	620518	1.72512e+06	0	620518	11671.7	964578	762722	2075.52	760910	0	0	0	0	0	0	3768.87	388.032	282.373	105.586	154.613	95.5328	59.3678	48.3512
Max	Norway	NOR	HIC	Europe	Northern Europe	NA	OECD Non-EU countries	5.25027e+06	0.352915	2.56417e+06	2.56417e+06	782134	867276	36187.3	1.14876e+06	1.93635e+06	782134	0	0	2.57035e+06	2558.58	2.56794e+06	0	2.56794e+06	1842.81	2.56631e+06	782134	1.93825e+06	0	782134	36187.3	1.14876e+06	868996	2519.14	867276	0	0	0	0	0	0	4328.28	445.951	323.731	122.22	190.219	120.969	74.559	68.1205
Mean	Nepal	NPL	LIC	Asia	Southern Asia	NA	Other non-OECD Asia	2.93509e+07	0.261389	4.202e+06	2.67019e+06	2.67015e+06	37.613	0	0	37.613	528490	1.53181e+06	2.14167e+06	4.68113e+06	60170.8	4.62096e+06	1.53181e+06	3.08915e+06	49811.5	3.03934e+06	2.67015e+06	369188	2.14167e+06	528490	0	0	369188	369150	37.613	1.73288e+06	408782	1.7311e+06	1778.99	1.07036e+06	461446	3.78345e+06	10530.2	7664.37	2865.85	6025.05	2514.98	3510.08	112028
Min	Nepal	NPL	LIC	Asia	Southern Asia	NA	Other non-OECD Asia	2.93509e+07	0.261389	4.07657e+06	2.55921e+06	2.55917e+06	37.613	0	0	37.613	508276	1.45109e+06	2.03069e+06	4.53645e+06	57920.2	4.47753e+06	1.45109e+06	2.96159e+06	42544	2.91601e+06	2.55917e+06	314939	2.03069e+06	508276	0	0	314939	314901	37.613	1.63695e+06	369173	1.63529e+06	1600.52	998647	408318	3.6674e+06	10073.4	7329.25	2733.5	4674.99	1934.89	2684.05	93964.8
Lower quartile	Nepal	NPL	LIC	Asia	Southern Asia	NA	Other non-OECD Asia	2.93509e+07	0.261389	4.17728e+06	2.64791e+06	2.64788e+06	37.613	0	0	37.613	523036	1.51372e+06	2.11994e+06	4.64924e+06	59666.5	4.58932e+06	1.51372e+06	3.05988e+06	47345.1	3.01041e+06	2.64788e+06	349201	2.11994e+06	523036	0	0	349201	349163	37.613	1.71418e+06	400083	1.71242e+06	1740.14	1.05577e+06	450484	3.75861e+06	10430.1	7591.35	2837.67	5532.04	2285.95	3205.75	104830
Median	Nepal	NPL	LIC	Asia	Southern Asia	NA	Other non-OECD Asia	2.93509e+07	0.261389	4.20172e+06	2.66962e+06	2.66958e+06	37.613	0	0	37.613	528373	1.53122e+06	2.14113e+06	4.6795e+06	60152.2	4.61915e+06	1.53122e+06	3.08683e+06	49490.8	3.03678e+06	2.66958e+06	365456	2.14113e+06	528373	0	0	365456	365418	37.613	1.73256e+06	408456	1.73076e+06	1776.41	1.07022e+06	461247	3.78309e+06	10526.9	7662.86	2865.14	5953.51	2466.43	3453.01	110007
Upper quartile	Nepal	NPL	LIC	Asia	Southern Asia	NA	Other non-OECD Asia	2.93509e+07	0.261389	4.22597e+06	2.69186e+06	2.69182e+06	37.613	0	0	37.613	534026	1.54867e+06	2.16259e+06	4.71231e+06	60671.6	4.65174e+06	1.54867e+06	3.11749e+06	51953.7	3.06715e+06	2.69182e+06	385772	2.16259e+06	534026	0	0	385772	385734	37.613	1.75153e+06	416923	1.74972e+06	1814.45	1.08441e+06	472111	3.80786e+06	10630	7737.18	2893.17	6452.33	2699.47	3750.92	117363
Max	Nepal	NPL	LIC	Asia	Southern Asia	NA	Other non-OECD Asia	2.93509e+07	0.261389	4.35135e+06	2.80488e+06	2.80484e+06	37.613	0	0	37.613	559092	1.62962e+06	2.2633e+06	4.85224e+06	63187.1	4.78906e+06	1.62962e+06	3.26432e+06	62861.1	3.21671e+06	2.80484e+06	465725	2.2633e+06	559092	0	0	465725	465687	37.613	1.84423e+06	464078	1.84221e+06	2056.09	1.17011e+06	526364	3.92226e+06	11117.7	8092.78	3024.91	8452.5	3925.99	5150.78	162508
Mean	Nauru	NRU	HIC	Oceania	Micronesia	NA	Other non-OECD Asia	11983.4	0.0639231	6580.14	6550.86	6368.17	182.689	0	0	182.689	6368.17	29.28	0	6598.12	5.40823	6592.71	29.28	6563.43	6.14819	6557.28	6368.17	189.107	0	6368.17	0	0	189.107	6.41757	182.689	0	0	0	0	19.2922	9.98773	40.8364	0.946212	0.688629	0.257583	0.852137	0.526498	0.325639	0.147226
Min	Nauru	NRU	HIC	Oceania	Micronesia	NA	Other non-OECD Asia	11983.4	0.0639231	4000.75	3983.58	3965.21	1.01295	0	0	1.01295	3965.21	0	0	4014.14	2.69172	4010.94	0	3993.78	2.56053	3990.63	3965.21	7.33813	0	3965.21	0	0	7.33813	3.83488	1.01295	0	0	0	0	0	0	6.25428	0.462157	0.33357	0.128587	0.294843	0.183965	0.110877	0.0745011
Lower quartile	Nauru	NRU	HIC	Oceania	Micronesia	NA	Other non-OECD Asia	11983.4	0.0639231	6021.74	5995.89	5824.8	106.347	0	0	106.347	5824.8	12.8586	0	6039.67	4.66471	6035.16	12.8586	6008.52	5.06723	6001.54	5824.8	112.609	0	5824.8	0	0	112.609	5.84612	106.347	0	0	0	0	8.11867	3.51549	23.9082	0.816373	0.593764	0.221726	0.677831	0.417121	0.256123	0.128519
Median	Nauru	NRU	HIC	Oceania	Micronesia	NA	Other non-OECD Asia	11983.4	0.0639231	6578.78	6555.27	6360.17	167.634	0	0	167.634	6360.17	25.2723	0	6596.55	5.32521	6591.55	25.2723	6567.46	5.96976	6561.26	6360.17	174.026	0	6360.17	0	0	174.026	6.41081	167.634	0	0	0	0	16.332	7.83106	36.6004	0.931852	0.676593	0.253507	0.817516	0.50545	0.310565	0.145834
Upper quartile	Nauru	NRU	HIC	Oceania	Micronesia	NA	Other non-OECD Asia	11983.4	0.0639231	7122.52	7089.8	6906.41	243.503	0	0	243.503	6906.41	41.6974	0	7140.11	6.06847	7134.96	41.6974	7102.85	7.0617	7096.16	6906.41	249.975	0	6906.41	0	0	249.975	6.99826	243.503	0	0	0	0	27.2222	14.2411	53.4988	1.06253	0.773239	0.288625	0.991012	0.61304	0.380638	0.164803
Max	Nauru	NRU	HIC	Oceania	Micronesia	NA	Other non-OECD Asia	11983.4	0.0639231	9543.47	9517.85	9074.45	709.383	0	0	709.383	9074.45	138.722	0	9568.01	9.6877	9559.65	138.722	9534.03	12.6096	9524.15	9074.45	716.615	0	9074.45	0	0	716.615	9.24226	709.383	0	0	0	0	106.666	58.1705	149.415	1.71501	1.25072	0.464289	2.39992	1.61946	0.853847	0.283763
Mean	New Zealand	NZL	HIC	Oceania	Australia and New Zealand	NA	OECD Oceania	5.04509e+06	0.236001	3.16933e+06	3.16933e+06	2.8504e+06	310717	8214.01	0	318931	2.8504e+06	0	0	3.17515e+06	2246.38	3.1729e+06	0	3.1729e+06	1378.5	3.17152e+06	2.8504e+06	321124	0	2.8504e+06	8214.01	0	312910	2193.14	310717	0	0	0	0	0	0	3624.89	393.186	286.182	107.004	160.779	99.1167	61.662	50.4429
Min	New Zealand	NZL	HIC	Oceania	Australia and New Zealand	NA	OECD Oceania	5.04509e+06	0.236001	2.25112e+06	2.25112e+06	1.89376e+06	173897	1791.77	0	177826	1.89376e+06	0	0	2.2561e+06	1547.39	2.2543e+06	0	2.2543e+06	876.672	2.25312e+06	1.89376e+06	179564	0	1.89376e+06	1791.77	0	175580	1235.97	173897	0	0	0	0	0	0	2453.15	267.607	195.126	72.4806	92.423	55.8665	36.5565	23.7128
Lower quartile	New Zealand	NZL	HIC	Oceania	Australia and New Zealand	NA	OECD Oceania	5.04509e+06	0.236001	2.81349e+06	2.81349e+06	2.49234e+06	273827	2813.24	0	281391	2.49234e+06	0	0	2.81902e+06	2044.76	2.81689e+06	0	2.81689e+06	1224.41	2.81543e+06	2.49234e+06	283545	0	2.49234e+06	2813.24	0	275795	1876.81	273827	0	0	0	0	0	0	3296.2	356.909	259.767	97.0837	141.602	87.0785	53.9983	40.6371
Median	New Zealand	NZL	HIC	Oceania	Australia and New Zealand	NA	OECD Oceania	5.04509e+06	0.236001	3.22391e+06	3.22391e+06	2.91214e+06	306778	4032.35	0	314176	2.91214e+06	0	0	3.22968e+06	2209.16	3.22736e+06	0	3.22736e+06	1346.86	3.22609e+06	2.91214e+06	316567	0	2.91214e+06	4032.35	0	309081	2202.54	306778	0	0	0	0	0	0	3562.66	386.943	281.627	105.364	157.131	96.7873	60.0906	48.7932
Upper quartile	New Zealand	NZL	HIC	Oceania	Australia and New Zealand	NA	OECD Oceania	5.04509e+06	0.236001	3.4925e+06	3.4925e+06	3.17074e+06	341712	11970	0	350832	3.17074e+06	0	0	3.49856e+06	2417.7	3.49619e+06	0	3.49619e+06	1492.78	3.4945e+06	3.17074e+06	353087	0	3.17074e+06	11970	0	343852	2509.26	341712	0	0	0	0	0	0	3896.85	423.668	308.451	115.362	175.445	108.291	67.516	58.6554
Max	New Zealand	NZL	HIC	Oceania	Australia and New Zealand	NA	OECD Oceania	5.04509e+06	0.236001	4.39782e+06	4.39782e+06	4.0596e+06	555417	55716.2	0	567521	4.0596e+06	0	0	4.4037e+06	3748.82	4.40095e+06	0	4.40095e+06	2599.25	4.39944e+06	4.0596e+06	570233	0	4.0596e+06	55716.2	0	558128	3210.83	555417	0	0	0	0	0	0	6061.12	649.738	466.427	183.311	298.06	207.073	121.624	102.343
Mean	Oman	OMN	HIC	Asia	Western Asia	NA	Middle East and North Africa	4.5839e+06	0.226342	1.80995e+06	1.79363e+06	1.69789e+06	95746.6	0.334962	0	95746.9	1.69789e+06	16314.2	0	1.81545e+06	1505.81	1.81394e+06	16314.2	1.79763e+06	1967.77	1.79566e+06	1.69789e+06	97771.7	0	1.69789e+06	0.334962	0	97771.3	2024.73	95746.6	0	0	0	0	10715.3	5598.9	19787.8	263.506	191.812	71.6942	247.471	152.682	94.7889	46.7861
Min	Oman	OMN	HIC	Asia	Western Asia	NA	Middle East and North Africa	4.5839e+06	0.226342	1.14197e+06	1.13425e+06	1.0304e+06	515.428	0	0	515.428	1.0304e+06	0	0	1.14537e+06	675.697	1.14447e+06	0	1.13674e+06	747.57	1.13551e+06	1.0304e+06	2687.73	0	1.0304e+06	0	0	2687.73	1008.23	515.428	0	0	0	0	0	0	1880.8	121.003	87.9499	33.0535	85.6435	51.3544	29.2999	17.5724
Lower quartile	Oman	OMN	HIC	Asia	Western Asia	NA	Middle East and North Africa	4.5839e+06	0.226342	1.63349e+06	1.62032e+06	1.5309e+06	53948.3	0	0	53948.3	1.5309e+06	2199.49	0	1.63867e+06	1292.64	1.63727e+06	2199.49	1.62431e+06	1601.11	1.62262e+06	1.5309e+06	55990.1	0	1.5309e+06	0	0	55990.1	1728.74	53948.3	0	0	0	0	1359.88	537.935	5668.73	226.442	164.761	61.546	193.175	118.907	73.0535	37.2486
Median	Oman	OMN	HIC	Asia	Western Asia	NA	Middle East and North Africa	4.5839e+06	0.226342	1.79585e+06	1.77978e+06	1.68795e+06	86191.9	0	0	86191.9	1.68795e+06	9035.47	0	1.80144e+06	1477.47	1.79989e+06	9035.47	1.78356e+06	1894.03	1.78185e+06	1.68795e+06	88174.8	0	1.68795e+06	0	0	88174.8	2031.14	86191.9	0	0	0	0	5646.6	2605.89	12606	258.624	188.163	70.3012	235.525	144.623	89.66	45.5264
Upper quartile	Oman	OMN	HIC	Asia	Western Asia	NA	Middle East and North Africa	4.5839e+06	0.226342	1.97111e+06	1.95005e+06	1.84914e+06	129212	0	0	129212	1.84914e+06	23645.4	0	1.9769e+06	1687	1.97521e+06	23645.4	1.95431e+06	2263.87	1.95208e+06	1.84914e+06	131412	0	1.84914e+06	0	0	131412	2314.49	129212	0	0	0	0	15369.7	7589.09	27128.1	295.305	214.777	80.2939	287.144	178.324	110.381	55.005
Max	Oman	OMN	HIC	Asia	Western Asia	NA	Middle East and North Africa	4.5839e+06	0.226342	2.71729e+06	2.67025e+06	2.59819e+06	377428	81.698	0	377428	2.59819e+06	123001	0	2.72436e+06	2688.11	2.72229e+06	123001	2.67526e+06	4499.14	2.67194e+06	2.59819e+06	380099	0	2.59819e+06	81.698	0	380099	3170.32	377428	0	0	0	0	88529	58372.7	126595	482.254	351.088	131.166	894.691	564.494	330.196	102.928
Mean	Pakistan	PAK	LMC	Asia	Southern Asia	NA	Other non-OECD Asia	2.27181e+08	0.125119	4.05508e+07	2.23808e+07	2.21624e+07	0	218453	0	218453	364192	1.817e+07	2.17982e+07	4.7004e+07	390159	4.66138e+07	1.817e+07	2.84438e+07	238088	2.82058e+07	2.21624e+07	6.04336e+06	2.17982e+07	364192	218453	0	5.82491e+06	5.82491e+06	0	1.76395e+07	4.1587e+06	1.76214e+07	18050.9	1.03094e+07	7.86055e+06	4.05964e+07	68291.4	49704.1	18587.2	25480.6	10331.7	15148.9	1.77139e+06
Min	Pakistan	PAK	LMC	Asia	Southern Asia	NA	Other non-OECD Asia	2.27181e+08	0.125119	3.54439e+07	1.83862e+07	1.8163e+07	0	175938	0	175938	364192	1.38457e+07	1.77988e+07	4.172e+07	326859	4.13697e+07	1.38457e+07	2.40919e+07	174636	2.38838e+07	1.8163e+07	4.30489e+06	1.77988e+07	364192	175938	0	4.10287e+06	4.10287e+06	0	1.35901e+07	2.56092e+06	1.35758e+07	11119.3	7.22879e+06	5.19032e+06	3.54395e+07	56952.6	41431	15521.6	16898.1	7108.59	9789.52	1.16897e+06
Lower quartile	Pakistan	PAK	LMC	Asia	Southern Asia	NA	Other non-OECD Asia	2.27181e+08	0.125119	3.96763e+07	2.15151e+07	2.12999e+07	0	181743	0	181743	364192	1.73244e+07	2.09357e+07	4.59983e+07	377349	4.56146e+07	1.73244e+07	2.74471e+07	224381	2.72184e+07	2.12999e+07	5.59741e+06	2.09357e+07	364192	181743	0	5.38068e+06	5.38068e+06	0	1.68609e+07	3.73279e+06	1.68436e+07	16176.8	9.66412e+06	7.30318e+06	3.97109e+07	65981	48013.7	17961.4	23638.7	9552.8	13974.4	1.60889e+06
Median	Pakistan	PAK	LMC	Asia	Southern Asia	NA	Other non-OECD Asia	2.27181e+08	0.125119	4.05249e+07	2.23453e+07	2.21274e+07	0	201218	0	201218	364192	1.81447e+07	2.17632e+07	4.69917e+07	389276	4.66058e+07	1.81447e+07	2.84112e+07	237398	2.81702e+07	2.21274e+07	5.9987e+06	2.17632e+07	364192	201218	0	5.78017e+06	5.78017e+06	0	1.76185e+07	4.1233e+06	1.76005e+07	17824.3	1.02672e+07	7.8216e+06	4.05681e+07	68124.1	49595.4	18550	25360.1	10278.1	15034.1	1.75103e+06
Upper quartile	Pakistan	PAK	LMC	Asia	Southern Asia	NA	Other non-OECD Asia	2.27181e+08	0.125119	4.1422e+07	2.3203e+07	2.29739e+07	0	237961	0	237961	364192	1.89697e+07	2.26097e+07	4.79942e+07	402634	4.76009e+07	1.89697e+07	2.93931e+07	250622	2.91448e+07	2.29739e+07	6.44166e+06	2.26097e+07	364192	237961	0	6.21881e+06	6.21881e+06	0	1.83871e+07	4.53531e+06	1.83686e+07	19705.1	1.09099e+07	8.39429e+06	4.14868e+07	70514.7	51327.6	19180.6	27136.2	10998.8	16183.3	1.91059e+06
Max	Pakistan	PAK	LMC	Asia	Southern Asia	NA	Other non-OECD Asia	2.27181e+08	0.125119	4.51678e+07	2.69423e+07	2.67263e+07	0	567701	0	567701	364192	2.29843e+07	2.63621e+07	5.27532e+07	456415	5.23215e+07	2.29843e+07	3.39317e+07	318905	3.36242e+07	2.67263e+07	8.5498e+06	2.63621e+07	364192	567701	0	8.32193e+06	8.32193e+06	0	2.17353e+07	6.73919e+06	2.17136e+07	30002.2	1.51793e+07	1.12793e+07	4.52062e+07	80232.7	58439	21983.5	36178.5	15552.7	21803.8	2.79582e+06
Mean	Panama	PAN	UMC	Americas	Latin America and the Caribbean	Central America	Latin America	4.27709e+06	0.314121	1.50094e+06	1.14949e+06	1.13989e+06	9600.83	0	0	9600.83	927588	351449	212306	1.61758e+06	6539.17	1.61104e+06	351449	1.25959e+06	4868.05	1.25473e+06	1.13989e+06	114832	212306	927588	0	0	114832	105232	9600.83	171684	40622.6	171509	175.349	103793	247656	575162	1144.13	832.722	311.411	542.709	240.898	301.811	32099.5
Min	Panama	PAN	UMC	Americas	Latin America and the Caribbean	Central America	Latin America	4.27709e+06	0.314121	1.35047e+06	1.03544e+06	1.02569e+06	8396.7	0	0	8396.7	812443	285403	207287	1.44467e+06	5252.79	1.43875e+06	285403	1.10737e+06	2919.57	1.10417e+06	1.02569e+06	51594.1	207287	812443	0	0	51594.1	41249.1	8396.7	93191	3742.04	93119.8	23.5978	65594	183426	505124	922.069	667.715	250.736	323.309	136.756	177.095	10304.5
Lower quartile	Panama	PAN	UMC	Americas	Latin America and the Caribbean	Central America	Latin America	4.27709e+06	0.314121	1.46813e+06	1.12252e+06	1.11301e+06	8815.35	0	0	8815.35	901211	335427	210908	1.5781e+06	6272.84	1.57172e+06	335427	1.22547e+06	4449.29	1.22069e+06	1.11301e+06	92332.2	210908	901211	0	0	92332.2	82680.4	8815.35	159528	25584.2	159360	108.359	93640.4	233937	558437	1095.7	797.348	298.204	487.781	216.418	271.157	24193.2
Median	Panama	PAN	UMC	Americas	Latin America and the Caribbean	Central America	Latin America	4.27709e+06	0.314121	1.49907e+06	1.14756e+06	1.13807e+06	9220.79	0	0	9220.79	925670	350435	212094	1.61442e+06	6522.61	1.60787e+06	350435	1.2562e+06	4828.99	1.25133e+06	1.13807e+06	110765	212094	925670	0	0	110765	101010	9220.79	174478	37771.7	174290	160.092	103612	246920	574291	1141.05	830.887	310.545	536.994	237.863	298.399	30158.8
Upper quartile	Panama	PAN	UMC	Americas	Latin America and the Caribbean	Central America	Latin America	4.27709e+06	0.314121	1.53179e+06	1.17429e+06	1.16462e+06	10191	0	0	10191	952150	366291	213525	1.65431e+06	6797.55	1.64755e+06	366291	1.2904e+06	5234.75	1.28531e+06	1.16462e+06	132432	213525	952150	0	0	132432	123080	10191	186692	52599.1	186509	226.584	113252	260858	590548	1190.29	866.514	324.066	591.173	262.292	328.779	37611.7
Max	Panama	PAN	UMC	Americas	Latin America and the Caribbean	Central America	Latin America	4.27709e+06	0.314121	1.69994e+06	1.35454e+06	1.34589e+06	16086.9	0	0	16086.9	1.13564e+06	455769	222978	1.84362e+06	8201.78	1.83659e+06	455769	1.47038e+06	7505.91	1.4662e+06	1.34589e+06	260545	222978	1.13564e+06	0	0	260545	251832	16086.9	210248	119186	210124	603.151	158602	334439	684314	1437.92	1048.13	389.783	885.967	408.292	495.213	112282
Mean	Pitcairn Islands	PCN	UMC	Oceania	Polynesia	NA	Other non-OECD Asia	66.9474	1	12.8545	5.33262	5.33262	0	0	0	0	0	7.52188	5.33262	13.13	0.203212	12.9268	7.52188	5.40491	0.0722814	5.33262	5.33262	0	5.33262	0	0	0	0	0	0	4.30432	1.02831	4.29994	0.00437772	4.02041	3.50148	13.13	0.0355703	0.0258871	0.00968315	0.0064658	0.00272562	0.00374018	0
Min	Pitcairn Islands	PCN	UMC	Oceania	Polynesia	NA	Other non-OECD Asia	66.9474	1	0	0	0	0	0	0	0	0	0	0	0	0	0	0	0	0	0	0	0	0	0	0	0	0	0	0	0	0	0	0	0	0	0	0	0	0	0	0	0	0
[truncated: 460 more rows]
[truncated: 41 more columns]

## Sheet: 01a_Process_names_units
Process_ID	Process_short_name	Process_long_name	Unit
tP1	Generated_MSW_trib	MSW generated (tributary model)	t·y-1
tP2	Collected_MSW_trib	MSW collected (tributary model)	t·y-1
[truncated: 79 more rows]

## Sheet: 02_Coefficients
									Coefficient short name:	Plastic_MSW	Rigid_plastic	Uncol_litter_pct	MSW_col_pct	Col_sys_deb_em_pct	MSW_recv_pct	Cont_disp_pct	MSW_recy_pct	Comp_pct	Incin_pct	Form_dry_recy_pct	Disp_open_burn_pct	Disp_debris_em_pct	Uncol_burnt_pct	Uncol_litter_plas_pct	Uncol_burnt_plas_pct	Col_sys_deb_em_plas_pct	Disp_debris_em_plas_pct	Inf_plas_col_pct	Form_plas_col_pct	Uncon_disp_burnt_plas_pct	Uncol_unburnt_plas_pct	Uncol_litter_plas_rig_pct	Uncol_burnt_plas_rig_pct	Col_sys_deb_em_plas_rig_pct	Disp_debris_em_plas_rig_pct	Uncon_disp_burnt_plas_rig_pct	Uncol_unburnt_plas_rig_pct	Inf_plas_rig_col_pct	Form_plas_rig_col_pct	Inf_rig_sort_loss_pct	Inf_flex_sort_loss_pct	Form_rig_sort_loss_pct	Form_flex_sort_loss_pct	Inf_rig_mis_sort_loss_pct	Inf_flex_mis_sort_loss_pct	Form_rig_mis_sort_loss_pct	Form_flex_mis_sort_loss_pct	Inf_rig_mis_sort_loss_burnt_pct	Inf_flex_mis_sort_loss_burnt_pct
[truncated: 1,477 more rows]
[truncated: 2 more columns]

[truncated: 3 more sheets: 02a_Coefficient_names_units, 03_Outputs, 03a_Output_names_units]
