# Supplementary material for: A local-to-global emissions inventory of macroplastic pollution
Source: Research Square preprint supplement (doi:10.21203/rs.3.rs-3376960/v1), 2023-10-23
Supplement: Supplementary file 3 [file 42c3d01cb1a46f91df6c4e39.xlsx]

## Sheet: 00_Info
	Supplementary material for	A local-to-global emissions inventory of macroplastic pollution
	Software	Spatio-temporal plastic pollution origins and transport model (SPOT)
	Software version number	V1.0.0-G-092023
	Release date	2023-09-21
	Dataset name	ST_01_SPOT_Data_Cleaning.xls
	Authors	DBPR
	Correspondence	DBPR
	Correspondence to	DBPR
	Dataset description	Steps undertaken to check data for errors, clean, harmonize and allocate to spatial vectors.
	Contents
	01_Preliminary_screened_data	Data previously extracted from four global datasets (WAW2.0, WaCT, UNSD, WABI) and presented on a single sheet under basic harmonized categories. Each record has been allocated a unique ID linking it to a GADM polygon (boundary). Justification of why each boundary has been allocated is provided in note form and a 'boundary match score' allocated to each to indicate the level of confidence that th…
	02_Boundary_match=4_removed	Records which were had boundary match score of 4 - denoting low confidence - removed.
	03_Age_of_data_analysis	The age of each data point assessed. If necessary, original publications retrieved and checked to ensure dates provide were for data collection year not publication year.
	04_Age_of_data_removed	Waste generation rate data prior to 2006 removed. Other data retained.
	05_Duplicate_identification	Duplicates identified according to the name and unique ID. Manual checks performed per country in case of variable translation to English. Potential duplicates highlighted. identify duplicates - check similar names - look at name repeated, look at5 ID is duplicated , manual screen
	06_Duplicate_processing	Potential duplicates assessed and flagged for retention, deletion or individual data-points merged into new records according to hierarchy based on age of data and dataset pedigree. New merged records given a data ID prefix of 'CD'.
	07_Duplicates_removed	Duplicates flagged for deletion removed.
	08_Data_level_analysis	Based on data availability, each country allocated a GADM administrative level. Countries without data allocated based on literature.
	09_Incorrect_level_actions	Data which are incongruent with the GADM administrative boundary level chosen for teach country are either flagged for removal or merging or merged.
	10_Incorrect_levels_removed	Incongruent records removed or if feasible, merged with others to match a lower level.
	11.1_Outliers-Generation	Waste generation: outliers within each income category individually inspected to assess the probability that they arose from robust measurements (plausible) or whether they represent errors or poorly collected / processed data (implausible).
	11.2_Outliers-Collection_cov	Collection coverage: outliers within each income category individually inspected to assess the probability that they arose from robust measurements (plausible) or whether they represent errors or poorly collected / processed data (implausible).
	11.3_Outliers-Plastic	Plastic proportion: outliers within each income category individually inspected to assess the probability that they arose from robust measurements (plausible) or whether they represent errors or poorly collected / processed data (implausible).
	11.4_Outliers-Formal_dry_recy	Formal dry recycling: outliers within each income category individually inspected to assess the probability that they arose from robust measurements (plausible) or whether they represent errors or poorly collected / processed data (implausible).
	11.5_Outliers-Other_recovery	Other recovery: outliers within each income category individually inspected to assess the probability that they arose from robust measurements (plausible) or whether they represent errors or poorly collected / processed data (implausible).
	11.6_Outliers-Incineration	Incineration: outliers within each income category individually inspected to assess the probability that they arose from robust measurements (plausible) or whether they represent errors or poorly collected / processed data (implausible).
	11.7_Outliers-Controlled_disp	Controlled disposal: outliers within each income category individually inspected to assess the probability that they arose from robust measurements (plausible) or whether they represent errors or poorly collected / processed data (implausible).
	12_Cleaned_dataset	Outliers assessed as implausible removed.
	13_Cleaned_dataset_(no_blanks)	Records with no data cleared.
	14_FINAL_DATASET_(updated_IDs)	Final version - a few last records checked, merged, and allocated new single unique ID to match correct vector.

## Sheet: 01_Preliminary_screened_data
								Short_name:	Waste_gen_rate	Waste_gen_rate_yr	Col_cov	Col_cov_yr	Plastic_MSW	Plastic_MSW_yr	Plastic_rigid	Plastic_rigid_yr	Other_recv	Other_Recv_yr	Form_dry_recy	Form_dry_recy_yr	Incin	Incin_yr	Cont_disp	Cont_disp_yr	Cont_fac	Cont_fac_yr
								ID:	tP1pc		tC1		C0		C0a		tC2ii		tC2i		tC2iii		tC3
								Unit:	kg·cap-1·d-1	Year	% MSW generation	Year	% MSW generated	Year	% plastic in MSW	Year	% collected MSW	Year	% collected MSW	Year	% collected MSW	Year	% collected MSW for disposal	Year	% MSW generated	Year
Data_ID	Country	ISO3	Income_level	Municipality	UniqueID for matching admin boundary	GADM level of best match	GADM boundary match score	GADM boundary match notes	Waste generation rate	Waste generation rate year	Collection coverage	Collection coverage year	Plastic in MSW	Plastic in MSW year	Rigid plastic	Rigid Plastic Year	Other recovery	Other recovery year	Formal dry recycling	Formal dry recycling year	Incineration	Incineration year	Controlled disposal	Controlled disposal year	MSW collected and managed in controlled facilities	MSW collected and managed in controlled facilities year
WACT_01	Kenya	KEN	LMC	Nairobi	KEN.30_1	1	1	Population and boundary match well	0.7	2019	65.25	2019	9.6	2019	60.1042	2019					0	2019	0	2019	14.66	2019
WACT_02	Seychelles	SYC	HIC	Victoria	SYC	0	2	Population is for entire Seychelles not just Victoria. Assigned to entire Syechelles as unclear at what level WaCT applied.	2.34	2019	97.77	2019	11.9	2019	45.4622	2019					0	2019	100	2019	97.77	2019
WACT_03	Kenya	KEN	LMC	Kiambu	KEN.13_1	1	2	Population suggests WaCT applied for Kiambu County, therefore level 1 although this poorly matches the city limits.	0.53	2020	51.68	2020	6.77	2020	39.4387	2020					0	2020	0	2020	3	2020
WACT_04	Kenya	KEN	LMC	Mombasa	KEN.28_1	1	1	Population and boundary match well	0.59	2020	56.4	2020	8.47	2020	48.4061	2020					0	2020	0	2020	5.15	2020
WACT_05	Bangladesh	BGD	LMC	Khulna	BGD.4.5.6_1	3	3	Data population much less than GIS population, likely due to Khulna being divided into several parts within GADM. Level 2 has much larger population in GIS than dataset. Assumed data applies to central area of Khulna even though populations differ.	0.6	2021	62.89	2021	4.98	2021	29.7189	2021					0	2021	0	2021	0.26	2021
WACT_06	Cambodia	KHM	LMC	Kep	KHM.10.1_1	2	1	Level 2 (province) believed to be best match even though data population is less than GIS.	1.2	2021	58.15	2021	18.9	2021	48.2011	2021					0	2021	0	2021	0.05	2021
WACT_07	Cambodia	KHM	LMC	Sihanoukville	KHM.13_1	1	2	Population best matches level 1 although this is a poor match to the city boundaries.	1.75	2021	89.59	2021	22.65	2021	35.894	2021					0	2021	0	2021	0	2021
WACT_08	Democratic Republic of the Congo	COD	LIC	Bukavu	COD.22.2_1	2	1	Dataset population slightly higher than admin boundary but has the best match to the city boundaries.	0.69	2021	7.02	2021	6.37	2021	37.8336	2021					0	2021	0	2021	0.1	2021
WACT_09	Dominican Republic	DOM	UMC	Santo Domingo (East + Boco Chica)	DOM.31.5_1 + DOM.31.1_1	2	2	GIS population is slightly lower than that reported in dataset, likel due to urban agglomerates also being included.	1.04	2021	82.78	2021	12.85	2021	45.8366	2021					0	2021	6.66773	2021	5.63	2021
WACT_10	Ethiopia	ETH	LIC	Addis Ababa	ETH.1_1	1 or 2	2	Population in dataset slightly higher than GIS but GADM boundary clearly matches that of the city.	0.44	2021	98.19	2021	8.19	2021	49.2063	2021					20.7983	2021	0	2021	23.14	2021
WACT_11	Ethiopia	ETH	LIC	Bahir Dar	ETH.3.3_1	2 or 3	2	Both level 2 and 3 are same. The population matches well but the GADM boundary covers only part of the city boundaries	0.56	2021	85.53	2021	11.69	2021	55.6031	2021					0	2021	0	2021	0.37	2021
WACT_12	India	IND	LMC	Mangalore	IND.16.12.3_1	3	2	GIS population is higher than dataset as GADM boundary covers a larger area than the city boundary, but level 3 is the most granular and provides best fit.	0.67	2021	89.83	2021	9.24	2021	26.9481	2021					0	2021	0	2021	12.87	2021
WACT_14	Nigeria	NGA	LMC	Lagos	NGA.25_1	1	2	Dataset population is less than GIS population. Lv 1 GADM boundary extends along the coast outside city limits based on Google Maps. Level 2 is a worse fit as breaks city down into several districts.	0.79	2021	47.98	2021	31.83	2021	32.6422	2021					0	2021	0	2021	7.82	2021
WACT_15	Pakistan	PAK	LMC	Karachi	PAK.8.2_1	2	2	Population of dataset is higher than GIS population, but reasonably close and seems to be the best level of match	0.49	2021	81.17	2021	13.08	2021	22.7064	2021					0	2021	0	2021	0.06	2021
WACT_16	Tanzania	TZA	LMC	Dar es Salaan	TZA.2_1	1	1	Populaiton matches well. GADM boundary slightly larger than city	0.84	2021	35.61	2021	4.71	2021	57.5372	2021					0	2021	0	2021	0.97	2021
WACT_17	Tunisia	TUN	LMC	Sousse	TUN.20_1	1	3	No single boundary matches well as city is divided into several GADM polygons. Likely a combination of several of these, Level 1 probably best match	1.18	2021	90.2	2021	15.28	2021	49.8691	2021					0	2021	100	2021	90.2	2021
WACT_18	Zimbabwe	ZWE	LMC	Harare	ZWE.2.1_1	1 or 2	2	GIS population larger than dataset populaiton but GADM boundary matches city limits well. Both level 1 and 2 are the same for Harare.	0.56	2021	25.39	2021	15.11	2021	48.3786	2021					0	2021	0	2021	1.77	2021
WACT_19	Malaysia	MYS	UMC	Seremban	MYS.7.6_1	2	1	Population matches well as do adminsitrative boudnaries	0.88	2021	96.25	2021	15.83	2021	42.1352	2021					0	2021	100	2021	96.25	2021
WACT_20	Thailand	THA	UMC	Chonburi	THA.12_1	1	2	Level 1 best matches population, but GADM boundary also encompasses other cities (e.g. Pattaya City)	1.23	2021	98.18	2021	15.07	2021	49.3696	2021					0	2021	22.7854	2021	36.98	2021
WACT_21	Vietnam	VNM	LMC	Tam Ky	VNM.47.15_1	2	1	Good match to population and city limits	0.92	2021	93.86	2021	20.51	2021	45.2462	2021					0	2021	0	2021	0	2021
WACT_22	Vietnam	VNM	LMC	Hoi-An	VNM.47.6_1	2	1	Good match to population and city limits	0.64	2021	99.23	2021	16.75	2021	31.3433	2021					0	2021	100	2021	97.64	2021
WACT_23	Vietnam	VNM	LMC	Anonymous	VNM.54.2_1	2	2	Dataset population slightly higher but GADM boundary matches city limits well.	0.83	2021	97.33	2021	13.67	2021	41.4777	2021					0	2021	100	2021	76.56	2021
WACT_24	Indonesia	IDN	LMC	Anonymous	IDN.9.10_1	2	2	Dataset population less than GIS but GADM boundary matches city limits well.	0.48	2021	94.37	2021	17.72	2021	27.5395	2021					0	2021	0	2021	2.49	2021
WACT_25	Indonesia	IDN	LMC	Anonymous	IDN.9.16_1	2	1	Population and boundary match well	0.51	2021	88.04	2021	19.14	2021	31.7137	2021					0	2021	0	2021	0.82	2021
WACT_26	Ghana	GHA	LMC	Cape Coast	GHA.3.8_1	2	1	Good match to population and city limits	0.73	2021	62.59	2021	20.26	2021	20.3356	2021					0	2021	0	2021	0	2021
WACT_27	Egypt	EGY	LMC	Alexandria	EGY.6_1	1	2	Dataset population slightly more than GIS but is for more recent year (2022 vs 2020) so could have increased a bit.	0.93	2022	83.76	2022	15.98	2022	27.1589	2022					0	2022	100	2022	80.8	2022
WACT_28	Egypt	EGY	LMC	Anonymous	EGY.1_1	1	1	Population matches well. Applies to a governate (provincial) region	0.7	2022	59.93	2022	10.96	2022	36.3139	2022					0	2022	55.7325	2022	48.07	2022
WACT_29	India	IND	LMC	Thiruvananthapuram	IND.17.12.4_1	3	1	Population matches well as do city boudnaries	0.44	2021	68.02	2021	10.73	2021	54.4268	2021					0	2021	0	2021	49.47	2021
WACT_30	Kenya	KEN	LMC	Taita Taveta	KEN.39_1	1	1	Population matches well as do adminsitrative boudnaries	0.54	2022	30.06	2022	4.77	2022	61.6352	2022					0	2022	0	2022	1.32	2022
WACT_31	Philippines	PHL	LMC	Cagayan de Oro	PHL.49.5_1	2	1	Population matches well as do city boudnaries	0.38	2021	92.3	2021	15.52	2021	34.0851	2021					0	2021	100	2021	91.33	2021
WACT_32	Philippines	PHL	LMC	Legazpi	PHL.5.7_1	2	1	Population matches well, admin boundaries include more rural areas.	0.37	2021	61.7	2021	11.77	2021	49.6177	2021					0	2021	100	2021	56.46	2021
WACT_33	Philippines	PHL	LMC	Ormoc	PHL.43.30_1	2	1	Population matches well, admin boundaries include more rural areas.	0.31	2021	58.36	2021	19.19	2021	63.1579	2021					0	2021	0	2021	12.5	2021
WACT_34	Senegal	SEN	LMC	Dakar	SEN.1.1_1	2	2	GIS population slightly higher. Some uncertainty on how far along the peninsular the city spreads but Level 2 best matches the population so chosen.	0.97	2022	95.22	2022	9.13	2022	39.6495	2022					0	2022	0	2022	1.33	2022
WACT_35	Thailand	THA	UMC	Anonymous	THA.64.3_1	2	3	GIS population much bigger but matches pcity boundaries well	1.05	2021	97.97	2021	17.23	2021	41.0911	2021					93.3844	2021	0	2021	93.04	2021
WACT_36	Thailand	THA	UMC	Anonymous	THA.67.12_1	2	2	GIS Population less than dataset.. Unlikely to be level 1 as extends to mainland. Instead taken as level 2 to represent entire island of Koh Samui.	1.41	2021	94.46	2021	17.43	2021	44.9225	2021					0	2021	0	2021	25.84	2021
WACT_37	Thailand	THA	UMC	Anonymous	THA.64.7_1	2	3	GIS population much bigger but matches city boundaries well. Level 2 better match than level 3 for population	1.28	2021	95.24	2021	16.51	2021	38.0981	2021					0	2021	0	2021	10.6	2021
WACT_38	Thailand	THA	UMC	Anonymous	THA.67.13_1	2	1	Population matches well as do city boudnaries	1.22	2021	97.82	2021	24.5	2021	49.3469	2021					0	2021	0	2021	12.29	2021
WACT_39	Uganda	UGA	LIC	Anonymous	UGA.16.1_1 + UGA.57.3_1 + UGA.44.3_1 + UGA.57.1_1 + UGA.57.2_1	2	2	This is believed to be represented by five level 2 GADM boundaries. The population via GIS is slightly higher than that recorded in the dataset.	0.97	2021	34.82	2021	8.07	2021	31.1029	2021					0	2021	0	2021	1.96	2021
WABI_001	Australia	AUS	HIC	Adelaide	AUS.8.1_1+AUS.8.67_1+AUS.8.62_1+AUS.8.8_1+AUS.8.41_1+AUS.8.65_1+AUS.8.50_1+AUS.8.11_1+AUS.8.9_1+AUS.8.58_1+AUS.8.54_1+AUS.8.46_1+AUS.8.22_1+AUS.34_1+AUS.8.32_1+AUS.8.45_1	2	2	GIS population smaller than data. This is because the data is believed to represent the wider metropolitan area of Adelaide so joined several polygons	1.144	2007	100	2007	5	2007			12.15	2007	41.85	2007	0	2007	100	2007
WABI_002	Greece	GRC	HIC	Athens (GAA)	GRC.3.1_1	1 or 2	1	Added to level 2 as seems best match for population. Level 1 also the same.	1.6	2008	100	2008	13	2008			0.04	2008	9.96	2008	0	2008	100	2008
WABI_003	Bahrain	BHR	HIC	Bahrain	BHR	0	1	Good match with 2010 population	1.1	2009	100	2009	13.4	2009			0	2009	5	2009	0	2009	100	2009
WABI_004	Mali	MLI	LIC	Bamako	MLI.1.1.1_1	1 or 2 or 3	1	Good match with 2010 population	0.700001	2007	57	2007	2	2007			0	2007	0	2007	0	2007	0	2007
WABI_005	India	IND	LMC	Bangalore	IND.16.3.2_1	3	1	Added to Bangalore North LV3 as covers the majority of the city.	0.547945	2007	75	2007	11	2007			14	2007	0	2007	0	2007	73	2007
WABI_006	United Kingdom	GBR	HIC	Belfast	GBR.2.3.1_1	2 or 3	1	Reasonable match on population and matches boudnaries well	1.87088	2013	100	2013	6	2013			14.315	2013	20.685	2013	0	2013	98	2013
WABI_007	Brazil	BRA	UMC	Belo Horizonte	BRA.13.65_1	2	1	2.5mill pop on GIS seems plausible	1.08775	2007	82	2007	11	2007			0	2007	0.609756	2007	0	2007	100	2007
WABI_008	Kyrgyzstan	KGZ	LIC	Bishkek	KGZ.2.1_1	1 or 2	2	Population slightly higher than GIS population	0.542073	2010	83	2010	8	2010			0.1875	2010	3.38855	2010	0	2010	0	2010
WABI_009	Peru	PER	UMC	Canete	PER.16.3.14_1	3	1	Reasonable match on population	0.663024	2007	78	2007	9	2007			0	2007	1.28205	2007	0	2007	0	2007
WABI_010	Saint Lucia	LCA	UMC	Castries	LCA.3_1	1	1	Good match with 2010 population	0.596553	2007	100	2007	26	2007			0	2007	2.5	2007	0	2007	100	2007
WABI_011	Mauritius	MUS	UMC	Curepipe	MUS.7_1	1	3	360k pop bigger due to level 1 being the smallest level but does contain the area	0.777264	2009	100	2009	16	2009			0	2009	0	2009	0	2009	100	2009
WABI_012	Tanzania	TZA	LIC	Dar-es-Salaam	TZA.2_1	1	1	5.6mil pop in 2015 seems plausible	0.951406	2013	40	2013	16	2013			0	2013	0	2013	0	2013	0	2013
WABI_013	India	IND	LMC	Delhi	IND.25.1.1_1	1 or 2 or 3	1	16mil 2010 pop seems plausible	0.500072	2007	75	2007	1	2007			6	2007	0	2007	0	2007	10	2007
WABI_014	Bangladesh	BGD	LIC	Dhaka	BGD.3.1_1	2	2	Waste management is split differently for urban and rural areas. The GIS layer does not account for this difference. A regional level is chosen to represent Dhaka (level 2) even though this is bigger than Dhaka it is deemed the best fit.	0.543282	2007	55	2007	4	2007			1	2007	0	2007	0	2007	55	2007
WABI_015	Nepal	NPL	LIC	Ghorahi	NPL.4.3.1.39_1	4	2	Admin Boundary actually called TribhuwanNagarN.P. This data has higher population than in GIS measurement but believed to be same place.Wikipedia says Ghorahi has won award for cleanest landfill.	0.32491	2007	83	2007	5	2007			0	2007	2.40964	2007	0	2007	88	2007
WABI_016	Mexico	MEX	UMC	Guadalajara	MEX.14.43_1	2	2	GIS has double the population of this, but boundary matches well	1.17461	2010	95	2010	10	2010			0	2010	0	2010	0	2010	100	2010
WABI_017	Indonesia	IDN	LMC	Jakarta	IDN.7_1	1	1	Reasonable match on population in 2010	0.691981	2010	95	2010	14.27	2010			5	2010	0	2010	0	2010	84	2010
WABI_018	Uganda	UGA	LIC	Kampala	UGA.16.1_1+UGA.57.3_1+UGA.57.1_1+UGA.44.3_1	2	2	Data for Greater Kampala. Has bigger population than GIS suggest but boundary matches well	0.5	2010	50	2010	7.8	2010			0	2010	0	2010	0	2010	55	2010
WABI_019	China	CHN	LMC	Kunming	CHN.30.7.6_1	3	1	4mill pop in 2010 on GIS reasonable change	0.73392	2007	100	2007	7	2007			0	2007	0	2007	0	2007	100	2007
WABI_020	Pakistan	PAK	LMC	Lahore	PAK.7.5.2_1	3	1	Population matches well as does boundary	0.649752	2011	77	2011	12.25	2011			8	2011	0	2011	0	2011	18	2011
WABI_021	Zambia	ZMB	LIC	Lusaka	ZMB.5.4_1	2	2	1.1m Pop in 2010 so data pop is higher. Good match with boundary	0.376062	2007	63	2007	7	2007			0	2007	6.34921	2007	0	2007	45	2007
WABI_022	Nicaragua	NIC	LMC	Managua	NIC.13.2_1	2	1	Populaiton matches well	1.32632	2007	68	2007	8	2007			0	2007	0.735294	2007	0	2007	100	2007
WABI_023	Mozambique	MOZ	LIC	Maputo	MOZ.5.2_1	2	2	GIS has slightly higher population than referenced here. Could be Level 3 instead which has a lower population than reported here. Think Level 2 is best match as described as "District" level and GIS layer covers most of city	0.866133	2009	82	2009	8	2009			0	2009	0	2009	0	2009	0	2009
WABI_024	Liberia	LBR	LIC	Monrovia	LBR.11.2.1_1	2 or 3	1	Both level 2 and 3 have same GIS data but think based on oher cities, Level 3 is the best match.	0.617055	2013	37	2013	13	2013			0	2013	0	2013	0	2013	70	2013
WABI_025	Tanzania	TZA	LIC	Moshi	TZA.9.3_1	2	1	Good match on population and boundary	0.779477	2007	60	2007	9	2007			0	2007	0	2007	0	2007	87	2007
WABI_026	Kenya	KEN	LIC	Nairobi	KEN.30_1	1	1	Good match on population and boundary	0.958904	2007	52	2007	16.1	2007			0	2007	0	2007	0	2007	0	2007
WABI_027	Egypt	EGY	LMC	Qena	EGY.25.10_1	2	2	Better match with Level 2 and looking at GIS layer for comparison confirms but population reported here is lower than GIS. There is also a Qena city but that has a GIS population of zero so perhaps why. Added to Qena on LV2 instead.	0.49576	2009	100	2009	12.5	2009			0	2009	0	2009	0	2009	0	2009
WABI_028	Philippines	PHL	LMC	Quezon City	PHL.47.14_1	2	1	Good match on population and boundary	0.704859	2007	99	2007	16	2007			8	2007	0	2007	0	2007	98	2007
WABI_029	Netherlands	NLD	HIC	Rotterdam	NLD.14.67_1	2	1	600k pop seems plausible	1.50971	2007	100	2007	6.8	2007			9.729	2007	13.271	2007	76.23	2007	100	2007
WABI_030	United States	USA	HIC	San Francisco	USA.5.38_1	2	1	804k pop on GIS seems reasonable	1.66714	2007	100	2007	11	2007			13.344	2007	34.656	2007	0	2007	100	2007
WABI_031	Singapore	SGP	HIC	Singapore	SGP	0	1	Good match on population and boundary	1.32132	2013	100	2013	11	2013			0.93	2013	4.07	2013	38	2013	100	2013
WABI_032	Bulgaria	BGR	UMC	Sofia	BGR.5.1_1	1 OR 2	1	Good match on population and boundary	1.01159	2011	100	2011	15.6	2011			0	2011	0	2011	0	2011	100	2011
WABI_033	Tunisia	TUN	LMC	Sousse	TUN.20.15_1+TUN.20.4_1+TUN.20.17_1+TUN.20.14_1+TUN.20.16_1	2	2	Several level 2 polygons represented this data point best	0.622539	2007	100	2007	9	2007			0	2007	0	2007	0	2007	100	2007
WABI_034	India	IND	LMC	Surat	IND.11.28.2_1	3	2	Added to level 3 (Chorasi). Although this has a much lower GIS popualtion than that shown in the data here, this is believed to be due to an error in where the GIS popualtion is allcoated spatially. Chorosi in fact better matches city boundaries.	0.330554	2010	93	2010	10	2010			16	2010	0	2010	0	2010	75	2010
WABI_035	United States	USA	HIC	Tompkins County	USA.33.56_1	2	1	Good match on population and boundary	2.72632	2007	100	2007	11	2007			0	2007	37	2007	0	2007	100	2007
WABI_036	Bulgaria	BGR	UMC	Varna	BGR.24.11_1	2	1	Good match on population and boundary	1.13947	2007	100	2007	15	2007			0	2007	2	2007	0	2007	99	2007
WABI_037	Spain	ESP	HIC	Vitoria-Gasteiz	ESP.16.1.3.12 1	4	2	Lv3 and 4 both good matches. Decided Lv3 as more likely level at which waste is managed	1.06142	2012	100	2012	0.161	2012			0	2012	38	2012	0	2012	100	2012
WABI_038	India	IND	LMC	Warangal	IND.32.10.1_1	3	1	Added to Hanmakonda (LV3) which represent the Taluka which roughly covers the Greater Warangal Muncipal Corporation.	0.366583	2012	95	2012	12	2012			31	2012	0	2012	0	2012	12	2012
WABI_039	Egypt	EGY	LMC	Abo Badawy Village	EGY.23.4_1	2	3	same issue.. Small village large boundries, also name a bit different, Ezbet Abou Badawi 306k pop	0.567394	2012	100	2012	3	2012			0	2012	0	2012	0	2012	0	2012
WABI_040	Egypt	EGY	LMC	Assiut City	EGY.18.7_1	2	1	GIS population shows reasonable increase woith time	0.248825	2012	100	2012	10.03	2012			0	2012	0	2012	0	2012	0	2012
WABI_041	Ethiopia	ETH	LIC	Aweday City	ETH.8.14.10_1	3	2	in the Haro maya region, GIS pop much bigger, gis boundry is much larger than the town and contains other urban areas. No level 4 to further disaggregate	0.849938	2013	29	2013	3.3	2013			0	2013	0	2013	0	2013	0	2013
WABI_042	Ethiopia	ETH	LIC	Bale Robe	ETH.8.2.17_1	3	2	200k pop same isssue as above, small town big level 3 area covers the correct place	0.331348	2013	30	2013	4	2013			0	2013	0	2013	0	2013	0	2013
WABI_043	Egypt	EGY	LMC	Banha City	EGY.12.5_1	2	2	GIS pop bigger as boudnary covers much more than just the city and no more granular levels. V densly populated even on the outskirts of the city so probably has caused this higher pop	0.671613	2012	100	2012	13.5	2012			0	2012	0	2012	0	2012	0	2012
WABI_044	Egypt	EGY	LMC	Beila City	EGY.23.4_1	2	2	Think this is Biyala, in Kafr el sheikh(L1), is hard to find info on internet but one website says Beila is in Kafr el sh.. and one had the weather for 'bella' in this position. GIS has pop as 306k the area is a lot wider than the town itself	0.796665	2012	100	2012	5	2012			0	2012	0	2012	0	2012	0	2012
WABI_045	China	CHN	UMC	Bengbu	CHN.1.2.1_1	3	2	840k pop on GIS bit low but I think this is due to the boundry being quirte small with densly populated areas lying outside the boundry may explain the increase	0.723986	2018	100	2018	22	2018							73	2018	100	2018
WABI_046	Ethiopia	ETH	LIC	Bishoftu	ETH.8.15.1_1	3	2	in the adas region, small towns surround it in the L3. 339k GIS pop, probably larger due to the boundry size	0.349996	2013	80	2013	7.8	2013			0	2013	0	2013	0	2013	0	2013
WABI_048	Ethiopia	ETH	LIC	Burie	ETH.3.6.2_1	3	2	sometimes called bure or burie-zuria, 186k pop on GIS fairly close given timeframe, also this covers wider area than just the town	0.249066	2013	10	2013	13	2013			0	2013	0	2013	0	2013	0	2013
WABI_049	Ethiopia	ETH	LIC	Dilla	ETH.10.11.2_1	3	3	Not sure how long ago this pop was taken. City s cut in half by 3 boundries, this one covers the most part of the urban area. GIS has pop as 199k	0.25008	2013	30	2013	6	2013			0	2013	0	2013	0	2013	0	2013
WABI_050	Ethiopia	ETH	LIC	Dire Dawa	ETH.5.1.1_1	3	2	424k pop on GIS not sure why it is this much higher as surrounding area has low density pop but might be to do with time of data pop and slightly extendend boundry. Seems to be in the right place ref google	0.5	2013	60	2013	9	2013			0	2013	0	2013	0	2013	65	2013
WABI_051	Egypt	EGY	LMC	El Fateh City	EGY.18.4_1	2	3	Again I think this is on a smaller level than GIS has. Think this is the right place but is hard to be sure because of different spellings on maps and on google and in data. Pop also v different (327k pop) but this is likely due to the larger area level	0.83599	2012	100	2012	10.03	2012			0	2012	0	2012	0	2012	0	2012
WABI_052	Egypt	EGY	LMC	El Zarabi Village	EGY.18.2_1	2	2	found in the Abu Tij region, AZ zarabi on map. 349k pop on GIS this village is veery small in comparison to the region but no smaller levels exist.	0.434042	2012	100	2012	10.03	2012			0	2012	0	2012	0	2012	40	2012
WABI_053	Egypt	EGY	LMC	Fayoum City	EGY.4.1_1	2	3	960k pop on GIS al Fayyum is the placethat comes up in google but there are multiple spellings so tricky to say for sure3	0.686103	2012	100	2012	6	2012			0	2012	0	2012	0	2012	0	2012
WABI_054	Ethiopia	ETH	LIC	Jijiga	ETH.9.3.5_1	3	2	392k pop on GIS 2020, may be plausible given timeframe and some smaller towns surrounding	0.569781	2013	52	2013	20	2013			0	2013	0	2013	0	2013	0	2013
WABI_055	Ethiopia	ETH	LIC	Jimma	ETH.8.8.6_1	3	2	425k pop on GIS likely due to therr extended area of the L3s some dense pops surounding jimma, matches google	0.248487	2013	40	2013	7	2013			0	2013	0	2013	0	2013	0	2013
WABI_056	Egypt	EGY	LMC	Kafr El Sheikh City	EGY.23.7_1	2	2	656k pop, covers the city and extra densly populated space that surrounds	0.997391	2012	100	2012	5	2012			0	2012	0	2012	0	2012	0	2012
WABI_057	China	CHN	UMC	Lanzhou	CHN.5.7_1	2	2	4.2 mill pop on GIS big change but is likely due to the wider boundry around the city	1.04934	2018	100	2018	12	2018							100	2018	100	2018
WABI_058	South Africa	ZAF	UMC	Mangaung	ZAF.2.3.1_1	3	1	853k pop reasonable increase	0.806436	2015	90	2015	11.5	2015			0	2015	0	2015	0	2015	92	2015
WABI_059	South Africa	ZAF	UMC	Mbombela	ZAF.6.1.2_1	3	1	715k pop on GIS plausible increase correct location	0.6	2015	30	2015	16	2015			0	2015	0	2015	0	2015	60	2015
WABI_060	South Africa	ZAF	UMC	Msunduzi	ZAF.4.6.5_1	3	1	681k pop on GIS plausible increase correct location	0.444781	2015	77	2015	10	2015			0	2015	0	2015	0	2015	76	2015
WABI_061	Egypt	EGY	LMC	Sanmannoud City	EGY.5.8_1	2	2	spelt Samannnud on GIS, pop 384k, whixh is much higher but seems to be the rigfht place matching google and covers the entire city and more which may explain the increase, no L3s.	0.856936	2012	100	2012	6	2012			0	2012	0	2012	0	2012	0	2012
WABI_062	Egypt	EGY	LMC	Senuris city	EGY.4.5_1	2	2	601k pop on GIS called sinnerus but seen online that Senuris is in the level one area it is here. Covers sinnerus but also some surrounding areas so may be the reason for the high pop	0.691473	2012	100	2012	5	2012			0	2012	0	2012	0	2012	10	2012
WABI_063	Egypt	EGY	LMC	Shebin El Qanater City	EGY.12.9_1	2	2	544k pop, level very big so likely to include other urban areas	0.686779	2012	100	2012	13.5	2012			0	2012	0	2012	0	2012	0	2012
WABI_064	Egypt	EGY	LMC	Suez City	EGY.15_1	1	1	670k pop plausible increase	0.607345	2012	100	2012	0	2012			0	2012	0	2012	0	2012	0	2012
WABI_065	China	CHN	UMC	Suzhou	CHN.15.7_1	2	1	5.3mill pop on GIS reasonable increae in timeframe	1.53624	2018	100	2018	20	2018							73	2018	100	2018
WABI_066	China	CHN	UMC	Taian	CHN.23.12.4_1	3	2	1.8mil pop on GIS perhaps due to dense outskirt areas	1.12701	2018	100	2018	16	2018							64	2018	100	2018
WABI_067	Egypt	EGY	LMC	Tanta city	EGY.5.9_1	2	2	729k npop onm GIS bit of a large increase but may be plausible given the extended time frmae. Seems to be in the correct place	0.939148	2012	100	2012	6	2012			0	2012	0	2012	0	2012	50	2012
WABI_068	Ethiopia	ETH	LIC	Woldia	ETH.3.11.5_1	3	2	243k pop on GIS, other data suggests 86k pop and location mathches with google so think is the right place. Boundry quite large and includes aanother urban area which may explain change in pop	0.25079	2013	10	2013	27	2013			0	2013	0	2013	0	2013	0	2013
WABI_069	Ethiopia	ETH	LIC	Woliso	ETH.8.4.12_1	3	2	260k pop, l3 boundry contains other urban areas which likelyt explain the pop change. Matches google for location	0.250228	2013	30	2013	5	2013			0	2013	0	2013	0	2013	0	2013
WABI_070	Ethiopia	ETH	LIC	Wolkite	ETH.10.12.8_1	3	2	118k pop on GIS, other populated areas surrounding the town may explain increase. Matches google location	0.249066	2013	40	2013	7	2013			0	2013	0	2013	0	2013	0	2013
WABI_071	Ethiopia	ETH	LIC	Wuqro	ETH.11.4.6_1	3	2	179k pop, other populated areas surrounding the town may explain increase. Matches google location	0.249619	2013	50	2013	5	2013			0	2013	0	2013	0	2013	0	2013
WABI_072	China	CHN	UMC	Xian	CHN.22.7.6_1	3	1	5.2mill pop seems reasonable difference, area covers the city centre	1.70789	2018	100	2018	13	2018							94	2018	100	2018
WaW_001	Afghanistan	AFG	LIC	Jalalabad	AFG.22.9_1	2	1		0.520246	2017	95	2017	5.64561	2017			0	2017	0	2017	0	2017	0	2017
WaW_002	Afghanistan	AFG	LIC	Kandahar	AFG.15.5_1	2	1		0.813219	2017	95	2017	9.64252	2017			0	2017	0	2017	0	2017	0	2017
WaW_003	Afghanistan	AFG	LIC	Mazar-E-Sharif	AFG.4.11_1	2	2	Population differs with GIS population but believed to be same place	0.237743	2017	95	2017	10.6613	2017			0	2017	0	2017	0	2017	0	2017
WaW_004	Afghanistan	AFG	LIC	Kabul	AFG.14.6_1	2	2	Population differs with GIS population but believed to be same place	1.47297	2016	75	2016	11.1111	2016			0	2016	0	2016	0	2016	0	2016
WaW_005	Afghanistan	AFG	LIC	Herat	AFG.12.7_1	2	2	Population greatly differs with GIS population but believed to be same place	0.784262	2017	95	2017	12.0612	2017			0	2017	0	2017	0	2017	0	2017
WaW_006	Albania	ALB	UMC	Vlora	ALB.12.3.13_1	3	1		1.53858	2014	85	2014	11.1	2014			0	2014	0	2014	0	2014	0	2014
WaW_007	Albania	ALB	UMC	Korca	ALB.7.3.4_1	3	1		1.12477	2017	100	2017	11	2017			0	2017	0	2017	0	2017	100	2017
WaW_008	Algeria	DZA	UMC	Algiers	DZA.4_1	1	2	Population is a bit smaller than GIS population. Added to level 1 as best fit	1.30742	2016	100	2016	16.88	2016			1.11111	2016					91.3366	2016
WaW_009	Algeria	DZA	UMC	Mostaganem	DZA.30.17_1	2	2	Population is a much larger than GIS population but area shows a good match	0.608828	2006			10.5	2006
WaW_010	American Samoa	ASM	UMC	Pago Pago	ASM.1_1	1	3	No population in data to check matching of city. Lv1 chosen as other areas are believed to be likely too small an area to manage waste independently.					12.8
WaW_011	Angola	AGO	LMC	Luanda	AGO.11_1	1	1	Data added to level 1 as better match than level 2 to city boundaries.	0.8	2009			12	2009
WaW_012	Argentina	ARG	UMC	Cordoba	ARG.6.2_1	2	1		1.07708	2010	93.5	2010	14	2010			0	2010	0.68	2010	0	2010	69.7946	2010
WaW_013	Argentina	ARG	UMC	Ciudada Autonomous De Buenos Aires	ARG.5.1_1	1 OR 2	1		2.37152	2010	98.1	2010	16	2010									64.5815	2010
WaW_014	Argentina	ARG	UMC	Rosario	ARG.21.12_1	2	1		1.53511	2010	65.6	2010	11.5358	2010			14.5608	2010	0	2010	0	2010	100	2010
WaW_015	Armenia	ARM	UMC	Vanadzor			4	Both this city and Spitak fall within the same privince. The administrative boundaires only go to province level therefore do not match with this data. These are omitted for this reason.									0		0		0
WaW_016	Armenia	ARM	UMC	Spitak			4	Both this city and Vanadzor fall within the same privince. The administrative boundaires only go to province level therefore do not match with this data. These are omitted for this reason.									0		0		0
WaW_017	Australia	AUS	HIC	Perth	AUS.11.101_1	2	1						8.17547						18
WaW_018	Australia	AUS	HIC	Melbourne	AUS.10.44_1+AUS.10.31_1+AUS10.42_1+AUS.10.50_1+AUS.10.52_1+AUS.10.18_1+AUS.10.78_1+AUS.10.9_1+AUS.10.64_1+AUS.10.59_1+AUS.10.7_1+AUS.10.22_1+AUS.10.9_1+AUS.10.4_1+AUS.10.18_1+AUS.10.52_1+AUS.10.50_1+AUS.10.42_1+AUS.10.31_1+AUS.10.10_1+AUS.10.35_1+AUS.10.49_1+AUS.10.74_1+AUS.10.40_1+AUS.10.43_1+AUS.10.26_1+AUS.10.20_1+AUS.10.14_1	2	2	Population is of the wider urban agglomeration (from cities codebook). Level 2 splits Melbourne into several district. These are assumed to all represent the data point					15.3285				0		25.81		0		100
WaW_019	Australia	AUS	HIC	Canberra	AUS.2.1_1	2	1	Also called Unincorporated Australiam Capital Territory	2.71163	2010			4	2010			0	2010	70	2010	0	2010	93.3333	2010
WaW_020	Austria	AUT	HIC	Vienna	AUT.9_1	1	1		1.63145	2013	100	2013	2.9	2013
WaW_021	Azerbaijan	AZE	UMC	Baku	AZE.1.2_1	2	1		2.26878	2013	50.77	2013	10.3896	2013			0	2013	0	2013	39.9703	2013	100	2013
WaW_022	Bahrain	BHR	HIC	Manama			4	No Useful data
WaW_023	Bangladesh	BGD	LMC	Patuakhali	BGD.1.5.7_1	3	2	Data added to level 3 although GIS population bigger and covers larger area. Upazila deemed best fit for waste data	0.366702	2012	60	2012	2.88971	2012			0	2012	0	2012	0	2012	0	2012
WaW_024	Bangladesh	BGD	LMC	Rajshahi	BGD.5.7.3_1	3	2	Data added to level 3 although GIS population smaller as believed to cover correct area and has a closer match with the GIS population than level 2.	0.340274	2012	72	2012	4.05081	2012			0	2012	0	2012	0	2012	0	2012
WaW_025	Bangladesh	BGD	LMC	Rangpur	BGD.6.7.7_1	3	2	Data added to level 3 although GIS population bigger and covers larger area. Upazila deemed best fit for waste data	0.756238	2012	32	2012	4.54909	2012			0	2012	0	2012	0	2012	0	2012
WaW_026	Bangladesh	BGD	LMC	Chittagong	BGD.2.4.4_1+BGD.2.4.2_1+BGD.2.4.19_1+BGD.2.4.18_1+BGD.2.4.17_1+BGD.2.4.14_1+BGD.2.4.13_1+BGD.2.4.11_1+BGD.2.4.9_1+BGD.2.4.8_1+BGD.2.4.7_1	3	2	City split into several level 3's so joined these to represent the City corporation.	0.809519	2012	42	2012	7.21072	2012			1.4194	2012	0	2012	0	2012	0	2012
WaW_027	Bangladesh	BGD	LMC	Dhaka	BGD.3.1.4_1+BGD.3.1.3_1+BGD.3.1.2_1+BGD.3.1.1_1+BGD.3.1.46_1+BGD.3.1.45_1+BGD.3.1.44_1+BGD.3.1.42_1+BGD.3.1.43_1+BGD.3.1.41_1+BGD.3.1.40_1+BGD.3.1.39_1+BGD.3.1.38_1+BGD.3.1.37_1+BGD.3.1.35_1+BGD.3.1.34_1+BGD.3.1.33_1+BGD.3.1.32_1+BGD.3.1.31_1+BGD.3.1.30_1+BGD.3.1.28_1+BGD.3.1.27_1+BGD.3.1.25_1+BGD.3.1.26_1+BGD.3.1.24_1+BGD.3.1.23_1+BGD.3.1.22_1+BGD.3.1.20_1+BGD.3.1.19_1+BGD.3.1.18_1+BGD.3.1.17_1+…	3	2	City split into several level 3's so joined these to represent the City corporation.	0.684782	2005	44	2005	4.1	2005			0	2005	0	2005	0	2005	0	2005
WaW_028	Belarus	BLR	UMC	Grodno	BLR.3.5_1	2	1	Also called Hrodna	1.20056	2016	99	2016	8.6	2016			0	2016	0.6	2016	0	2016	100	2016
WaW_029	Belarus	BLR	UMC	Minsk	BLR.5.11_1	2	1		1.62441	2016	100	2016	10.0958	2016			0	2016	0	2016	0	2016	97	2016
WaW_030	Belgium	BEL	HIC	Liege	BEL.3.3.2_1	3	2	Data population slightly higher than GIS but there is a good match with the city boundary	1.41016	2014	100	2014					17	2014	53	2014	26	2014	100	2014
WaW_031	Belgium	BEL	HIC	Brussels	BEL.1.1.1_1	3	1		1.11417	2013	100	2013	11	2013
WaW_032	Belize	BLZ	UMC	San Pedro	BLZ.3_1	1	2	Level 1 (regional level) is the maximum granularity of admin layers. The data point was assumed representative of the region.	1.95934	2015	57.6	2015	13	2015			0	2015	0	2015	0	2015	100	2015
WaW_033	Belize	BLZ	UMC	Belize City	BLZ.1_1	1	2	Level 1 (regional level) is the maximum granularity of admin layers. The data point was assumed representative of the region.	1.9858	2015	66	2015	21	2015			0	2015	0	2015	0	2015	100	2015
WaW_034	Benin	BEN	LIC	Porto Novo	BEN.10_1	1	2	Data added to level 1 despite the level 1 the area being much bigger than the city, therefore data assumed representative of the larger area. Also called Oueme	0.5	2000	25	2000
WaW_035	Benin	BEN	LIC	Cotonou	BEN.8.1_1	2	1		1.1028	2000	50	2000	4.43	2000
WaW_036	Bhutan	BTN	LMC	Thimphu	BTN.14.1_1	2	2	Thimphu split into a few disitrcts but the district selected (Chang) covers the majortiy of the city	0.516046	2016	95	2016	13.4865	2016			8.88889	2016	0	2016	0	2016	0	2016
WaW_037	Bhutan	BTN	LMC	Phuentsholing	BTN.2.10_1	2	1		0.447368	2014	95	2014	12.0879	2014			0	2014	0	2014	0	2014	100	2014
WaW_038	Bolivia	BOL	LMC	La Paz	BOL.4.17.3_1	3	1	Good match with population and municipal level according to GADM	0.733513	2010	90	2010	15.2	2010			1.11111	2010					100	2010
WaW_039	Bosnia and Herzegovina	BIH	UMC	Banja Luka	BIH.3.1.1_1	3	1		1.22887	2015	81.65	2015	22.2777	2015			0	2015	0	2015	0	2015	100	2015
WaW_040	Bosnia and Herzegovina	BIH	UMC	Sarajevo	BIH.2.6_1	2	2	Sarajevo city is comprised of several level 3 districts. Instead added this data point to level 2 although this is bigger than the city as was closer match to th epopulation recorded	1.3266	2014	95	2014	2.51256	2014
WaW_041	Botswana	BWA	UMC	Gaborone	BWA.4_1	1	2	Data population bigger than GIS but areas seems to match	0.7	2011			4.5	2011
WaW_042	Brazil	BRA	UMC	Rio De Janeiro	BRA.19.67_1	2	1		1.43	2014	100	2014	21.2371	2014			0	2014	0.5	2014	0	2014	100	2014
WaW_043	Brazil	BRA	UMC	Brasilia	BRA.7.1_1	2	1		0.784525	2016	98	2016	14.6707	2016			0	2016	0	2016	0	2016	100	2016
WaW_044	Brazil	BRA	UMC	Sao Paulo	BRA.25.564_1	2	1		1.1068	2014	97.8	2014	10.101	2014			3	2014	0	2014	0	2014	81.4433	2014
WaW_045	Bulgaria	BGR	UMC	Ruse			4	No Useful data
WaW_046	Bulgaria	BGR	UMC	Burgas			4	No Useful data
WaW_047	Burkina Faso	BFA	LIC	Bobo Dioulasso	BFA.9.1.2_1	3	2	GIS population higher than that of this data but believed to be correct scale	0.675549	1999
WaW_048	Burkina Faso	BFA	LIC	Ouagadougou	BFA.7.1.4_1	3	2	GIS population higher than that of this data but believed to be correct scale	0.65	2003	47.1	2003	10	2003
WaW_049	Burundi	BDI	LIC	Muyinga	BDI.13.6_1	2	2	Population data changed from original due to error in that reported. See comment in population cell.	0.112134	2013							0	2013	0	2013	0	2013	0	2013
WaW_050	Burundi	BDI	LIC	Kayanza	BDI.9.5_1	2	2	Population data changed from original due to error in that reported. See comment in population cell.	0.113108	2013
WaW_051	Burundi	BDI	LIC	Ngozi	BDI.15.6_1	2	2	GIS population is much higher than data population, but cross comparison on GIS seems to match	0.463845	2013							0	2013	0	2013	0	2013	0	2013
WaW_052	Burundi	BDI	LIC	Bujumbura	BDI.2_1	1	2	GIS population is slightly higher. Data allocated to level 1 as has best match with city boundaries	1.4	2013	14	2013					0	2013	0	2013	0	2013	0	2013
WaW_053	Cote d Ivoire	CIV	LMC	Abidjan	CIV.1.1.1_1	3	1	Good match with population and city boundaries.	0.79221	2010	48	2010	7.84314	2010
WaW_054	Cambodia	KHM	LMC	Phnom Penh	KHM.16_1	1	1	Added to level 1 due to Phnom Penh being a special administrative unit essentially acting as a municipality	1.12652	2015	84	2015	6	2015			0.15	2015	0	2015	0	2015	0	2015
WaW_055	Cameroon	CMR	LMC	Limbe	CMR.9.1_1	2	2	Added to department level (Lv2) as Lv3 splits Limbe					12.4
WaW_056	Cameroon	CMR	LMC	Douala	CMR.5.4_1	2	1	Also called Wouri	0.7	2000	60	2000
WaW_057	Cameroon	CMR	LMC	Yaounde	CMR.2.7_1	2	2	GIS population slightly lower. Also called Mfoundi	1.01798	2012	43	2012
WaW_058	Cameroon	CMR	LMC	Bafoussam	CMR.8.6_1	2	1	Population better matches Lv3 but boundary better matches Lv2. Chose Lv2 as matches other city levels in country.	0.425864	2000
WaW_059	Canada	CAN	HIC	Ottawa	CAN.9.35_1	2	1		0.953083	2013			7.3	2013					42.5	2013
WaW_060	Canada	CAN	HIC	Toronto	CAN.9.50_1	2	1		0.922407	2016			10.9671	2016			3.49009	2016	47.91	2016	0	2016	100	2016
WaW_061	Canada	CAN	HIC	Vancouver	CAN.2.14_1	2	1		1.01087	2014			17	2014
WaW_062	Chile	CHL	HIC	Santiago De Chile	CHL.14.5_1	2	3	Santiago is split into multiple districts at all levels. Think Santiago at level 2 OR 3 best matches but data population is much bigger than GIS population.	1.22561	2013	98	2013	9.52381	2013			0	2013	0	2013	0	2013	100	2013
WaW_063	China	CHN	UMC	Beijing	CHN.2.1_1	2	1	Data poitn matches best with level 2.	1.06221	2015			12.7	2015			2	2015	0	2015	8	2015	100	2015
WaW_064	Colombia	COL	UMC	Cali	COL.30.32_1	2	1		0.832911	2009	99	2015	3.21	2015			0	2015	15	2015	0	2015	100	2015
WaW_065	Colombia	COL	UMC	Medellin	COL.2.68_1	2	1		0.535593	2015	98.9	2013	9.37	2013			0	2013	16	2013	0	2013	100	2013
WaW_066	Colombia	COL	UMC	Bogota	COL.14.79_1	2	1		0.699696	2011	100	2013	19.03	2013			0	2013	17	2013	0	2013	100	2013
WaW_067	Comoros	COM	LIC	Moroni	COM.2_1	1	3	Level 1 is at the island level, of which Morini is within. The GIS population is much bigger than the data population for this reason but the city is assumed representative of the island.			60						0		0		0		40
WaW_068	Democratic Republic of the Congo	COD	LIC	Kinshasa	COD.10.1_1	2	2	Data has much higher population than GIS but area matches well	0.604125	2016							0	2016	0	2016	0	2016	0	2016
WaW_069	Republic of Congo	COG	LMC	Dolisie	COG.8.4_1	2	2	Data has much higher population than GIS and level 2 covers area bigger than that of city, but is the most granular	0.506128	2012			6.2	2012
WaW_070	Costa Rica	CRI	UMC	Alajuela	CRI.1.1_1	2	2	Small mismatch in populations due to admin boudnaries not fully matching entirety of city	0.869596	2016	100	2016	12.6	2016			0	2016	0.42	2016	0	2016	100	2016
WaW_071	Costa Rica	CRI	UMC	San Jose	CRI.7.15_1	2	2	Small mismatch in populations due to admin boudnaries not fully matching entirety of city	1.17141	2010	100	2016	10	2016			0	2016	5.2	2016	0	2016	99.5992	2016
WaW_072	Croatia	HRV	HIC	Zagreb	HRV.4.7_1	2	1		1.02013	2015	100	2015	21.9	2015
WaW_073	Croatia	HRV	HIC	Cakovec	HRV.10.2_1	2	1		1.50961	2015
WaW_074	Cuba	CUB	UMC	Havana	CUB.4_1	1	1	Data fits with level 1 best.	0.7	2015	100	2015	8	2015			0	2015	0	2015	0	2015	97	2015
WaW_075	Cyprus	CYP	HIC	Nicosia			4	City split into Northen Cyprus and Southern Cyprus in GADM administration layers. Unsure which this data relates to. Population is much smaller than GIS population as that is at regional level. Data point imitted for these reasons									2.87		9.89		0
WaW_076	Cyprus	CYP	HIC	Paralimini	CYP.1_1	1	2	Data is at city level but admin layer goes to regional level as a maximum. It is therefore assumed this city data is representative of the region.					17
WaW_077	Czech Republic	CZE	HIC	Karlovy Vary	CZE.3.2_1	2	2	Data population is more than GIS popualtion but believed to be good match otherwise	1.20411	2014
WaW_078	Czech Republic	CZE	HIC	Prague	CZE.11_1	1	1	Good match at level 1 but default is level 2 - municipality level	0.88349	2013
WaW_079	Denmark	DNK	HIC	Copenhagen	DNK.1.25_1	2	1		1.12346	2014	100	2014
WaW_080	Djibouti	DJI	LMC	Djiibouti City	DJI.3.1_1	2	1		0.594059	2002							0	2002	0	2002	0	2002	0	2002
WaW_081	Dominican Republic	DOM	UMC	Santo Domingo	DOM.5.1_1	1 or 2	2	Main part of Santo Domingo is called Distrito Nacional however the city extends beyong this. The Data population is higher than GIS for this reason, however, the majority of the city is covered so it is deemed a reasonable match.	1.47451	2013	85	2013	8.8845	2013			0	2013	0	2013	0	2013	72	2013
WaW_082	Ecuador	ECU	UMC	Quito	ECU.19.6_1	2	1		0.955056	2012	89	2012	14.21	2012									100	2012
WaW_083	Egypt	EGY	LMC	Cairo	EGY.11_1	1	1	Added to level 1 as provided best fit	1.66667	2012	65	2012	3.8	2012
WaW_084	El Salvador	SLV	LMC	San Salvador	SLV.10.16_1	2	2	Data population much greater than GIS however this is likely due to municipality of San Salvador not covering the entirety of the city. It is deemed however a reasonable approximation	0.733625	2013	65.38	2013	11	2013			0	2013	0	2013	0	2013	100	2013
WaW_085	Equatorial Guinea	GNQ	UMC	Labe			4	Could not find city within Equatorial Guinea
WaW_086	Estonia	EST	HIC	Tallinn	EST.1.20_1	2	1		1.41549	2012			14	2012
WaW_087	Estonia	EST	HIC	Tartummaa	EST.13.18_1	2	2	Data population larger than GIS population but area matches well					0.0699301
WaW_088	Ethiopia	ETH	LIC	Adola Woyu	ETH.8.5.1_1	3	2	Data population is significatnly smaller than GIS population but believed to be correct place.	0.270017	2015			6.30946	2015
WaW_089	Ethiopia	ETH	LIC	Bule Hora	ETH.8.3.3_1	3	2	Bule Hora is a city in the region of the same name (lv3), therefore GIS population is larger than data. The city data is assumed representative of the region.	0.570024	2015			5.4	2015
WaW_090	Ethiopia	ETH	LIC	Addis Ababa	ETH.1.1_1	1 OR 2	1	Fits with level 1 Or 2 best	0.542829	2010	70	2010	12.6059	2010
WaW_091	Ethiopia	ETH	LIC	Maichew	ETH.11.1.3_1	3	2	Maichew is a town within Endamehoni district (level 3) therefore population of GIS slightly larger. Maichew data is assumed representative of Endamehoni district	0.400591	2015			5.55836	2015
WaW_092	Ethiopia	ETH	LIC	Tepi	ETH.10.18.3_1	3	2	Tepi is a town within the Yeki district (level 3), therefore GIS population slightly larger. Tepi is assumed representative of Yeki	0.35626	2015			1.00503	2015
WaW_093	Ethiopia	ETH	LIC	Gerbe Guracha	ETH.8.17.11_1	3	2	Gerbe Guracha is a town within the Kuyu district (level 3), therefore GIS population slightly larger. Gerbe Guracha is assumed representative of Kuyu	0.348937	2015			4.25441	2015
WaW_094	Ethiopia	ETH	LIC	Weldiya	ETH.3.11.5_1	3	2	Debre Tabor is a town within the Farta district (level 3), therefore GIS population slightly larger. Debre Tabor is assumed representative of Farta	0.151951	2015			7.53769	2015
WaW_095	Ethiopia	ETH	LIC	Debre Tabor	ETH.3.4.4_1	3	2	Weldiya is a town within the Guba Lafto district (level 3), therefore GIS population slightly larger. Weldiya is assumed representative of Guba Lafto	0.228699	2015			1.02041	2015
WaW_096	Ethiopia	ETH	LIC	Bati	ETH.3.9.2_1	3	2	Bati at Level 3 is actually the region which contains the town of Bati, therefore GIS population is slightly larger. It is assumed the data is representative of the region.	0.195981	2015			6.95348	2015
WaW_097	Ethiopia	ETH	LIC	Dire Dawa	ETH.5.1.1_1	3	2	Dire Dawa at level 3 is the region which contains the town of Dire Dawa, therefore the GIS population is larger. The town data here is assumed representative of the region. There is also a administrative region adjacent called Dire Dawa/Town although this does not appear to overlap the town in GIS and the population is much lower.	0.724638	2015	69	2015	9.95025	2015			0	2015	0	2015	0	2015	0	2015
WaW_098	Ethiopia	ETH	LIC	Halaba Kulito	ETH.10.1.1_1	3	2	Halaba Kulito is a town within the Alaba district (level 3), therefore GIS population slightly larger. Halaba Kulito is assumed representative of Alaba					3.6963
WaW_099	Ethiopia	ETH	LIC	Dembi Dolo	ETH.8.9.9_1	3	2	Dembi Dolo is a town within the Sayo district (level 3), therefore GIS population slightly larger. Dembi dolo is assumed representative of Sayo	0.220014	2015			2.2897	2015
WaW_100	Fiji	FJI	UMC	Suva	FJI.1.3_1	2	2	Suva is a city in the Rewa province which is the most granular level the administrative boudnaries go. Suva is assumed representative of Rewa.	0.773256	2012	100	2012	8.03213	2012
WaW_101	Finland	FIN	HIC	Oulu	FIN.3.2.3.8_1	4	2	Data population is much bigger than GIS population, but are matches well.									0		0		0		100
WaW_102	Finland	FIN	HIC	Riihimaki	FIN.5.9.4.3_1	4	1						15.7842
WaW_103	Finland	FIN	HIC	Turku	FIN.5.3.4.16_1	4	1						17.6176
WaW_104	France	FRA	HIC	Paris	FRA.8.3_1	2	1	Level 2 selected as good match on population and boundary	1.32778	2015	100	2015	16.7	2015			0	2015	17.1	2015	77.5	2015	100	2015
WaW_105	France	FRA	HIC	Angers-Loire Metropole	FRA.12.2.1_1	3	2	Waste management is at the commune level (Lv5) in France, however there are 37,000 of these and often very small so in rural areas will often join forces. Angers-Loire Metropole is a collection of communes, although not represented by the administrative boundaries, Level 3 best matches the size but is slightly larger than teh metropole therefore GIS population is slightyl bigger.	1.34668	2015	100	2015					22.9364	2015	17.66	2015	0.230869	2015	91.5182	2015
WaW_106	Gabon	GAB	UMC	Libreville	GAB.1.2_1	2	2	Regional level (Lv2) is the most granual although this is larger than the city. Libreville is within the Komo-Mondah region however and forms a large part of it therefore it is assumed to be representative.	1.61759	2005	57	2005					0	2005	0	2005	0	2005	0	2005
WaW_107	Gambia	GMB	LIC	Banjul	GMB.1_1	1	1	Data is at level 1 but default is level 2	0.661631	2002	35	2002	0	2002
WaW_108	Georgia	GEO	LMC	Tbilisi	GEO.12.1_1	2	1				100		12.9611
WaW_109	Germany	DEU	HIC	Berlin	DEU.3.1.1_1	1 OR 2 OR 3	1		1.03842	2015			8	2015			0	2015	28	2015	65	2015	100	2015
WaW_110	Germany	DEU	HIC	Hamburg	DEU.6.1.1_1	1 OR 2 OR 3	1						1.60048
WaW_111	Ghana	GHA	LMC	Accra	GHA.5.1_1	2	1		1.02041	2013	82.5	2013	10.3175	2013			0	2013	0	2013	0	2013	0	2013
WaW_112	Ghana	GHA	LMC	Kumasi	GHA.1.16_1	2	1		0.74	2015			17.5824	2015
WaW_113	Greece	GRC	HIC	Athens	GRC.3.1.12_1	3	1		1.28081	2012			0.00995818	2012
WaW_114	Greece	GRC	HIC	Thessaloniki	GRC.6.1.35_1	3	2	Data population bigger than GIS as municipality boundary is smaller than city boundary, but is a close match	1.01015	2015			13.9	2015
WaW_115	Guatemala	GTM	UMC	Guatemala City	GTM.7_1	1	1	Added to level 1 as best fit	0.629458	2013	72	2013	17	2013			0	2013	0	2013	0	2013	0	2013
WaW_116	Guatemala	GTM	UMC	Antigua Guatemala	GTM.16.2_1	2	1		0.560026	2011			12	2011
WaW_117	Guatemala	GTM	UMC	Jutiapa	GTM.11.10_1	2	2	Data population larger than GIS but area matches well	0.357144	2014	12.5	2014	11.8118	2014			0	2014	0	2014	0	2014	0	2014
WaW_118	Guinea	GIN	LIC	Conakry	GIN.2.1_1	2	1		0.755477	1996	76	1996	5.30531	1996
WaW_119	Haiti	HTI	LIC	Port Au Prince	HTI.8.5_1	2	1	Added to level 2 as best match	0.7	2015	12.4	2015	15.4	2015			0	2015	0	2015	0	2015	100	2015
WaW_120	Honduras	HND	LMC	Tegucigalpa	HND.8.4_1	2	1		0.754296	2015	97	2015	8.16327	2015									92.4997	2015
WaW_121	Honduras	HND	LMC	San Pedro Sula	HND.6.10_1	2	1		0.931526	2016	59	2016	11.2611	2016
WaW_122	Hungary	HUN	HIC	Debrecen	HUN.9.3_1	2	1						15.4277
WaW_123	Hungary	HUN	HIC	Budapest	HUN.5.1_1	2	1		1.57035	2014			21.1577	2014			0	2014	0	2014	52	2014	0	2014
WaW_124	India	IND	LMC	Greater Mumbai	IND.20.18_1+IND.20.17_1	2	2	Greater Mumbai incorporates two Level 3 vectors.	0.54841	2016	100	2016	0	2016			0	2016	0	2016	0	2016	0	2016
WaW_125	India	IND	LMC	Delhi	IND.25.1.1_1	1 OR 2 OR 3	1		0.993907	2014	76.5	2014	0	2014			12.7243	2014	0	2014			0	2014
WaW_126	India	IND	LMC	Bengaluru	IND.16.3.2_1	3	2	Added to level 3 but could possible represent Level 2.	0.487661	2016	85	2016	12	2016			17.5015	2016	0	2016	0	2016	0	2016
WaW_127	India	IND	LMC	Greater Hyderabad	IND.32.2.1_1	3	3	Data population much larger than GIS data as represents Greater Hyderabad where GIS only represents Hyderabad. Greater Hyderabad assumed representative of Hyderabad.	0.75109	2016	89	2016	8.60484	2016			48.8889	2016	0	2016	0	2016	21.7391	2016
WaW_128	India	IND	LMC	Chennai	IND.31.2_1	2	2	Chennai is split into several level 3 areas. This data was therefore added to level 2 instead. GIS population is slightly smaller than city population	0.832753	2016	90	2016	7.04987	2016			1	2016	0	2016	0	2016	100	2016
WaW_129	India	IND	LMC	Ahmedabad	IND.11.1.1_1	3	2	Data population slightly bigger than GIS population	0.518516	2016	98	2016	10	2016			42.623	2016					100	2016
WaW_130	India	IND	LMC	Surat	IND.11.28.2_1	3	1	GADM layer actually called Chorasi	0.31865	2016	97	2016					23.6181	2016	0	2016	0	2016	0	2016
WaW_131	India	IND	LMC	Pune	IND.20.26.7_1	3	1	Level 3 name is n.a. ( 1612). Both this Pune data row and that of the Pimpri-Chinchwad data row (below) fall within the Level 3 boundary called n.a. ( 1612). Applied a weighted average based on population between both when entering data into adminstrative boundaries form and summed population.	0.560922	2016	97	2016	5	2016			30.9715	2016	0	2016	0	2016	0	2016
WaW_132	India	IND	LMC	Jaipur	IND.29.17.6_1	3	1		0.502914	2016	97	2016					16.7331	2016	0	2016	0	2016	0	2016
WaW_133	India	IND	LMC	Lucknow	IND.34.49.1_1	3	1		0.506845	2016	97	2016	0	2016			23.4694	2016	0	2016	0	2016	0	2016
WaW_134	India	IND	LMC	Kanpur	IND.34.43.3_1	3	1		0.597023	2016	90.8	2016	2.25338	2016			57.1394	2016	0	2016
WaW_135	India	IND	LMC	Nagpur	IND.20.19.8_1	3	2	Data population bigger than GIS data but believed to be correct location	0.454656	2016	96	2016	12	2016			15.625	2016	0	2016	0	2016	0	2016
WaW_136	India	IND	LMC	Indore	IND.19.23.2_1	3	1		0.451264	2016	100	2016	3.5	2016			50	2016	0	2016	0	2016	0	2016
WaW_137	India	IND	LMC	Ludhiana	IND.28.12.3_1	3	1		0.597826	2016	29.3	2016	16.0481	2016			0	2016	0	2016	0	2016	0	2016
WaW_138	India	IND	LMC	Bhopal	IND.19.9.2_1	3	1		0.50844	2016	87.5	2016					21.85	2016	0	2016	0	2016	0	2016
WaW_139	India	IND	LMC	Vishakhapatnam	IND.2.10.8_1	3	1		0.561301	2016	100	2016	0	2016			0	2016	0	2016	0	2016	0	2016
WaW_140	India	IND	LMC	Pimpri-Chinchwad	IND.20.26.7_1	3	1	Level 3 name is n.a. ( 1612). Both this Pimpri-Chinchwad data row and that of the Pune data row (above) fall within the Level 3 boundary called n.a. ( 1612). Applied a weighted average based on population between both when entering data into adminstrative boundaries form and summed population.	0.431211	2016	100	2016	13.718	2016			75	2016					98.1862	2016
WaW_141	India	IND	LMC	Patna	IND.5.26.4_1	3	2	GIS population slightly bigger than data as covers larger area.	0.846152	2016	65	2016					0	2016	0	2016	0	2016	0	2016
WaW_142	India	IND	LMC	Ghaziabad	IND.34.30.1_1	3	2	GIS population much bigger than data as covers larger area.	0.451887	2016	100	2016	9.12	2016			40	2016	0	2016	0	2016	0	2016
WaW_143	India	IND	LMC	Nashik	IND.20.22.7_1	3	1		0.273907	2016	100	2016					0	2016	0	2016	0	2016	36.3636	2016
WaW_144	India	IND	LMC	Rajkot	IND.11.26.11_1	3	1		0.373659	2016	99	2016	2.11	2016			0	2016	0	2016	0	2016	0	2016
WaW_145	India	IND	LMC	Faridabad	IND.12.3.1_1	3	2	GIS population slightly bigger than data as covers larger area.	0.469573	2016			16.08	2016			46.397	2016	0	2016	0	2016	0	2016
WaW_146	India	IND	LMC	Allahabad	IND.34.45.1_1	3	2	Data population lower than that of GIS data as GIS vector covers area larger than city.	0.853682	2016	65	2016					28	2016	0	2016	0	2016	0	2016
WaW_147	India	IND	LMC	Dhanbad	IND.15.4.2_1	3	2	GIS population much bigger than data as covers larger area.	0.542549	2016	86	2016
WaW_148	India	IND	LMC	Srinagar	IND.35.6.2_1	3	3	Data population much bigger than GIS depsite GIS vector covering larger area. Srinagar falls in the Pauri GADM level 3 layer.	0.423313	2016	60	2016					0	2016	0	2016	0	2016	0	2016
WaW_149	India	IND	LMC	Vijaywada	IND.2.5.10_1	3	2	Populations match reasonably well however GIS vector actually covers a much larger area than the city itself	0.499212	2016	100	2016					25.5	2016	0	2016	0	2016	0	2016
WaW_150	India	IND	LMC	Amritsar	IND.28.1.2_1	3	1	Also called Baba Bakala	0.550167	2016	48.15	2016	1	2016			0	2016	0	2016	0	2016	0	2016
WaW_151	India	IND	LMC	Navi Mumbai	IND.20.33.7_1	3	2	GIS population much bigger than data as covers larger area. GADM level 3 called Thane and incorporates both Thane and Navi Mumbai. Data assumned representative of both	0.591898	2016	98	2016	0	2016			82	2016	0	2016	0	2016	100	2016
WaW_152	India	IND	LMC	Gwalior	IND.19.20.2_1	3	2	GIS population slightly bigger than data as covers larger area.	0.500734	2016	71	2016	11.2534	2016			39.5	2016	0	2016	0	2016	0	2016
WaW_153	India	IND	LMC	Mysore	IND.16.23.4_1	3	1		0.431395	2016	88.06	2016	13	2016			61.7284	2016	0	2016	0	2016	100	2016
WaW_154	India	IND	LMC	Coimbatore	IND.31.3.1_1	3	2	GIS population much bigger than data as covers larger area.	0.88695	2016	95.5	2016	0	2016			69.0323	2016					100	2016
WaW_155	India	IND	LMC	Jodhpur	IND.29.22.3_1	3	2	GIS population slightly bigger than data as covers larger area. Level 3 name is n.a. ( 652)	0.417796	2016	79	2016	15.3446	2016			31.385	2016	0	2016	0	2016	0	2016
WaW_156	India	IND	LMC	Kota	IND.29.24.2_1	3	1	There are two Kota's in India. This is believed to apply to the one in the Rajasthan state due to close match in population	0.911013	2016	65	2016	15	2016			0	2016	0	2016	0	2016	0	2016
WaW_157	India	IND	LMC	Guwahati	IND.4.15.1_1	3	1	There are three Level 3 'Guwahait's'. This data was added to the one named 'Kamrup Metropolitan' in Level 2. Data was still added at the Level 3 however.	0.750846	2016	85	2016					9.85577	2016	0	2016	0	2016	0	2016
WaW_158	India	IND	LMC	Bhubaneswar	IND.26.19.1_1	3	1		0.62072	2016	100	2016					0	2016	0	2016	0	2016	0	2016
WaW_159	India	IND	LMC	Warangal	IND.32.10.1_1	3	1		0.487015	2016	100	2016	13.74	2016			5.73687	2016	0	2016	0	2016	0	2016
WaW_160	India	IND	LMC	Cuttack	IND.26.7.3_1	3	2	GIS population much bigger than data as covers larger area.	0.357144	2016	84	2016					0	2016	0	2016	0	2016	0	2016
WaW_161	India	IND	LMC	Kochi	IND.17.2.3_1	3	2	Assumed to better represent the mainland area of Kochi (Cochi) known as Ernakulum	0.32765	2016	100	2016	21.6	2016			51.4031	2016	0	2016	0	2016	99.7375	2016
WaW_162	India	IND	LMC	Tirunelveli	IND.31.27.9_1	3	1		0.444346	2016	90	2016					0	2016	0	2016	0	2016	0	2016
WaW_163	India	IND	LMC	Kozhikode	IND.17.8.1_1	3	2	Data population is much smaller than GIS population as GIS boundary is larger than just the city.	0.817826	2016	85	2016					29.4118	2016	0	2016	0	2016	0	2016
WaW_164	India	IND	LMC	Imphal	IND.21.5.1_1	3	2	Population matches reasonably well however GIS GADM layer shows it actually splits the city of Imphal in half, with the Imphal named vector covering the western portion of the city.	0.298237	2016	100	2016	5	2016
WaW_165	India	IND	LMC	Shimla	IND.13.9.9_1	3	2	Data population bigger than GIS data but believed to be correct location	0.611059	2016	90	2016					0	2016	0	2016	0	2016	0	2016
WaW_166	India	IND	LMC	Tenali	IND.2.4.7_1	3	2	GIS population slightly bigger than data as covers larger area.	0.593791	2016	97	2016	0	2016			3.38164	2016	0	2016	0	2016	0	2016
WaW_167	India	IND	LMC	Rudrapur	IND.35.12.1_1	3	2	GIS population bigger than data as covers larger area. Lvel 3 name is Bazpur	0.457136	2016	92	2016					0	2016	0	2016	0	2016	0	2016
WaW_168	India	IND	LMC	Tadipatri	IND.2.1.10_1	3	2	GIS population slightly bigger than data as covers larger area. Called Tadpatri in GADM	0.369518	2016	100	2016	12.5	2016			70	2016	0	2016	0	2016	0	2016
WaW_169	India	IND	LMC	Itanagar	IND.3.10.1_1	3	2	GIS population slightly bigger than data as covers larger area. There are three level 3 Itanagars, here we chose the data to represent Itanagar with Level 2 name 'Lower Subansiri' as this matched with the town of Itanagar.	1.34454	2016	75	2016	7	2016			83.8926	2016	0	2016	0	2016	0	2016
WaW_170	India	IND	LMC	Leh	IND.14.13.1_1	3	2	GIS population much bigger than data population as covers are muhch larger than the town. Believed to be the same place however. Level 3 name is n.a. ( 1)	1.90169	2016	100	2016					0	2016	0	2016	0	2016	0	2016
WaW_171	Indonesia	IDN	LMC	Jakarta	IDN.7_1	1	1	Added to level 1 as best fit	0.798701	2010	80	2010	13.2487	2010			0	2010	0	2010	0	2010	0	2010
WaW_172	Iran	IRN	UMC	Tehran	IRN.28.8_1	2	1	Population slightly higher in data than GIS but generally good match	0.931926	2014	100	2014	7	2014			51.9	2014	4	2014			0	2014
WaW_173	Iraq	IRQ	UMC	Baghdad	IRQ.10.1_1	2	2	Population of data more than GIS data but area matches very well with the city	1.37216	2015	93.7	2015					0	2015	0	2015	0	2015	0	2015
WaW_174	Ireland	IRL	HIC	Dublin	IRL.6_1	1	2	Population of data half that of GIS, this is due to adminsitrative levels only going up to county level so larger than city.	0.741978	2012	100	2012	8	2012			0	2012	49	2012	0	2012	0	2012
WaW_175	Isle of Man	IMN	HIC	Douglas			4	No data to add
WaW_176	Israel	ISR	HIC	Jerusalem	ISR.6_1	1	1												5
WaW_177	Israel	ISR	HIC	Tel Aviv	ISR.7_1	1	2	Population of data more than GIS data but area matches very well with the city									0		10.6		0		0
WaW_178	Italy	ITA	HIC	Milano	ITA.10.8_1	2	1	Although best match level 3, believe level 2 is more likely to be the level at which waste is managed in Italy so added to Lv 2	1.48004	2015	100	2015	12.6	2015			0	2015	49.9	2015	43.472	2015	100	2015
WaW_179	Italy	ITA	HIC	Parma	ITA.6.5_1	2	1	Although best match level 3, believe level 2 is more likely to be the level at which waste is managed in Italy so added to Lv 2	1.38016	2014	100	2014	26.4	2014			0	2014	72	2014	0	2014	0	2014
WaW_180	Japan	JPN	HIC	Osaka	JPN.33.27_1	2	1		1.04403	2015	100	2015	19.9	2015			0	2015	9.67	2015	78.0665	2015	100	2015
WaW_181	Japan	JPN	HIC	Kobe	JPN.13.22_1	2	1		0.990379	2015	100	2015	13.4	2015			0	2015	14.89	2015	72.6028	2015	100	2015
WaW_182	Japan	JPN	HIC	Naha	JPN.32.21_1	2	1		0.849925	2015	100	2015	31.5	2015			0	2015	15.01	2015	81.4956	2015	100	2015
WaW_183	Japan	JPN	HIC	Toyama	JPN.43.14_1	2	1		1.06983	2015	100	2015	15.1	2015			0.394095	2015	24.28	2015	68.2143	2015	100	2015
WaW_184	Japan	JPN	HIC	Kitakyushu	JPN.7.25_1	2	1		1.15354	2015	100	2015	8.70871	2015			0	2015	25.38	2015	64.9163	2015	100	2015
WaW_185	Japan	JPN	HIC	Yokohama	JPN.19.29_1	2	1		0.868767	2015	100	2015	11.88	2015			0	2015	25.543	2015	65.5533	2015	100	2015
WaW_186	Jordan	JOR	UMC	Amman	JOR.2_1	1	1	Added to level 1 as population matched better than level 2	1.13792	2015	100	2015	16	2015			0	2015	0	2015	0	2015	90	2015
WaW_187	Kazakhstan	KAZ	UMC	Atyrau	KAZ.4.1_1	2	1		0.993029	2015	100	2015	8.3	2015			0	2015	0	2015	0	2015	0	2015
WaW_188	Kazakhstan	KAZ	UMC	Kostanay	KAZ.10.13_1	2	2	Data population lower than that of GIS data			77
WaW_189	Kenya	KEN	LMC	Nairobi	KEN.30_1	1	1		0.745246	2013	50	2013	16.1161	2013			0	2013	0	2013	0	2013	0	2013
WaW_190	Kenya	KEN	LMC	Eldoret	KEN.44_1	1	3	Data is believed to be at the city level. As such the population of the data is much lower than that of the County, however it is deemed a good match by area			45	2005					0	2005	0	2005	0	2005	0	2005
WaW_191	Kiribati	KIR	LMC	South Tarawa	KIR	0	1		0.5	2015	38	2015	6.59341	2015			0	2015	0	2015	0	2015	0	2015
WaW_192	South Korea	KOR	HIC	Seoul	KOR.16_1	1	1	Added to level 1 due to Seoul being a special administrative unit essentially acting as a municipality	0.900529	2012			5.9	2012			29	2012	36	2012	8	2012	100	2012
WaW_193	Kosovo	XKO	LMC	Gjilan	XKO.2.1_1	2	1		0.821781	2011							0	2011	0	2011	0	2011	0	2011
WaW_194	Kosovo	XKO	LMC	Pristina	XKO.5.7_1	2	1		1.70813	2015	100	2015	14.78	2015			0	2015	0	2015	0	2015	88.8889	2015
WaW_195	Kuwait	KWT	HIC	Kuwait City	KWT	0	2	Population best matched with Level 0 therefore added to this level.			100						0		0		0		0
WaW_196	Kyrgyzstan	KGZ	LMC	Bishkek	KGZ.2_1	1	1		1.72524	2015	100	2015	7	2015
WaW_197	Kyrgyzstan	KGZ	LMC	Osh	KGZ.6_1	1	2	Data matches well but waste generation seems unreasonably high	3.03906	2015	80	2015	13.1113	2015			0	2015	0	2015	0	2015	0	2015
WaW_198	Laos	LAO	LMC	Vientiane	LAO.13_1	1	1		0.638917	2011	48	2011	12	2011			0	2011	0	2011	0	2011	55.5556	2011
WaW_199	Latvia	LVA	HIC	Liepaja	LVA.1.2_1	2	2	GIS population slightly bigger than data as covers larger area.			95		9.09091
WaW_200	Latvia	LVA	HIC	Riga	LVA.3.3_1	2	2	GIS population slightly bigger than data as covers larger area.	1.3301	2014
WaW_201	Lebanon	LBN	UMC	Beirut	LBN.3.1_1	2	1	Added to level 1 or 2 as best match/ Boundaries are the same across these levels	1.01159	2015	100	2015	13	2015			10.5263	2015					97.5263	2015
WaW_202	Lebanon	LBN	UMC	Saida	LBN.8.3_1	3	2	Added to the Level 2 as this covers the majority of Saida.	0.666667	2016	100	2016	17	2016			60	2016	20	2016	0	2016	0	2016
WaW_203	Liberia	LBR	LIC	Monrovia	LBR.11.2_1	2	1		0.738636	2007	20	2007	11	2007
WaW_204	Libya	LBY	UMC	Tripoli	LBY.20_1	1	1		0.64	2015	100	2015	18.6186	2015
WaW_205	Lithuania	LTU	HIC	Kaunas	LTU.2.4_1	2	1		1.22307	2013	100	2013	19.6071	2013			0	2013	13	2013	0	2013	100	2013
WaW_206	Lithuania	LTU	HIC	Vilnius	LTU.10.6_1	2	1		1.56437	2013	98	2013	9.91984	2013			0	2013	36	2013	0	2013	100	2013
WaW_207	Macedonia	MKD	UMC	Skopje	MKD.10_1	1	2	Skopje is split into several municipalities therefore this data was added to 'Cair' which is the centre most municipality covering the majority of the city. The GIS population is significantly smaller than the data point population as it appears the GIS population is not fully aligned with the city itself	1.1317	2016	87.83	2016	12.4	2016			0	2016	0	2016	0	2016	97.9381	2016
WaW_208	Macedonia	MKD	UMC	Kratovo	MKD.37_1	1	1		0.436127	2015			4.6	2015
WaW_209	Madagascar	MDG	LIC	Antananarivo	MDG.1.1.7_1+MDG.1.1.5_1+MDG.1.1.6_1+MDG.1.1.1_1	3	2	Data added to level 3 as matches boundaires of the city well, however there is a big difference in the population with the GIS population being much smaller. Also added the suburbs even though other Lv3 districts	0.476221	2016	88.5	2016	11.0922	2016
WaW_210	Malawi	MWI	LIC	Blantyre	MWI.2.1_1	2	1		0.390831	2013	30	2013
WaW_211	Malawi	MWI	LIC	Lilongwe	MWI.11.1_1	2	1		0.356052	2013	30	2013
WaW_212	Malaysia	MYS	UMC	Kuala Lumpur	MYS.4.1_1	2	2	Data population much greater than GIS data as it likely represent the wider metropolitan area of Kuala Lumpur whereas the GADM Kuala Lumpur boundary (lv 2) represents only the Federal Territory of KL.	0.801441	2016	80	2016	24.74	2016			0	2016	10.4	2016	0	2016	0	2016
WaW_216	Maldives	MDV	UMC	Maldives	MDV	0	3		1.45073	2017	100	2017	9.27867	2017			0	2017	0	2017	0	2017	0	2017
WaW_217	Mali	MLI	LIC	Bamako	MLI.1.1.1_1	1 OR 2 OR 3	1		0.820568	2008	57	2008	14.0351	2008
WaW_218	Mali	MLI	LIC	Sikasso	MLI.8.5_1	2	1	Added to Lv2 despite being a better fit for Lv3 as believed it is more likely the level at which waste is managed	0.569498	2012	25	2012					0	2012	0	2012	0	2012	0	2012
WaW_219	Marshall Islands	MHL	UMC	Majuro	MHL	0	1		0.891532	2013	66	2013	12.5	2013
WaW_220	Mauritania	MRT	LMC	Nouakchott	MRT.10.1_1	2	1				15		21
WaW_221	Mexico	MEX	UMC	Guadalajara	MEX.14.43_1	2	1		1.21739	2013	100	2013	18.96	2013									100	2013
WaW_222	Mexico	MEX	UMC	Mexico City	MEX.9_1	1	1	Added to level 1 as Mexico City is an autonomous region and the Level 1 boundary better fits the population and city boundaries	1.47824	2015	98.54	2015	13.16	2015			12.7619	2015	14.19	2015			94.1859	2015
WaW_223	Mexico	MEX	UMC	Monterrey	MEX.19.39_1	2	2	Data population is bigger than GIS population as the GIS administrative boundary does not cover the entirity of the city.	1.1452	2016	92.78	2016	16.1832	2016			0	2016	0	2016	0	2016	100	2016
WaW_224	Micronesia	FSM	LMC	Pohnpei	FSM.3_1	1	1		0.451929	2012	80	2012	25	2012
WaW_225	Moldova	MDA	LMC	Soldanesti	MDA.30_1	1	2	GIS population much bigger than data as covers larger area.	0.759482	2013	98	2013	9.10911	2013
WaW_226	Moldova	MDA	LMC	Chisinau	MDA.10_1	1	1		0.981678	2015	100	2015	5	2015
WaW_227	Mongolia	MNG	LMC	Ulaanbaatar	MNG.21.1_1	2	1		2.1886	2015	100	2015	18	2015			0	2015	0	2015	0	2015	0	2015
WaW_228	Montenegro	MNE	UMC	Podgorica	MNE.16_1	1	1		1.81284	2013	69.7	2013	15.61	2013			0	2013	0	2013	0	2013	100	2013
WaW_229	Montenegro	MNE	UMC	Kotor	MNE.10_1	1	1		1.23157	2013							0	2013	0	2013	0	2013	59.98	2013
WaW_230	Morocco	MAR	LMC	Rabat	MAR.11.2_1	2	1	Added to level 2 despite as better matched with city boundaries and population	1	2014	90	2014											100	2014
WaW_231	Morocco	MAR	LMC	Tangier	MAR.14.4_1	2	3	City of Tangier is split into several administrative districts. This data was allocated to the Level 2 as closer match to population	0.871731	2017	31	2017	11	2017			0	2017	0	2017	0	2017	0	2017
WaW_232	Morocco	MAR	LMC	Beni Mellal	MAR.13.2.6_1+MAR.13.2.1_1	3	3	City of Beni Mellal is split into 2 administrative districts. This data was allocated to theboth level 3 districts depsite it increasing the population more than the data suggests	0.754214	2016			7	2016
WaW_233	Mozambique	MOZ	LIC	Maputo	MOZ.5.2_1	2	1		1	2016	75	2016	10	2016			0	2016	0	2016	0	2016	0	2016
WaW_234	Myanmar	MMR	LMC	Yangon	MMR.15.4_1+MMR.15.1_1	2	2	Yangon split into two Level 2 districts. This data was added to both districts	0.412536	2016			8	2016			0	2016	0	2016	0	2016	0	2016
WaW_235	Myanmar	MMR	LMC	Mandalay	MMR.8.2_1	2	2	GIS population much bigger than data as covers larger area.	0.94	2017	80	2017	15	2017
WaW_236	Namibia	NAM	UMC	Windhoek	NAM.5.10_1+NAM.5.3_1+NAM.5.7_1+NAM.5.4_1+NAM.5.6_1+NAM.5.5_1+NAM.5.1_1+NAM.5.2_1+NAM.5.8_1	2	1	Windohoek is split into several districts. This data was added to all that cover the boundaries of the city	0.752688	2000	93	2000	16	2000
WaW_237	Nepal	NPL	LIC	Kathmandu	NPL.1.1.3_1	3	1		0.534653	2012	86.9	2012	20.14	2012			0	2012	0	2012	0	2012	100	2012
WaW_238	Nepal	NPL	LIC	Pokhara	NPL.5.2.2.32_1	4	1	There are two Pokhara's, this was added to PokharaN.P. as better match with city and population	0.44194	2012	42.7	2012	9.92099	2012			0	2012	0	2012	0	2012	100	2012
WaW_239	Nepal	NPL	LIC	Lalitpur	NPL.1.1.5.27_1	4	1		0.522207	2012	71.2	2012	15.5616	2012			0	2012	0	2012	0	2012	100	2012
WaW_240	Nepal	NPL	LIC	Biratnagar	NPL.2.1.3.13_1	4	1	Called BitartnagarN.P.	0.332325	2012	85.7	2012	11.99	2012			0	2012	0	2012	0	2012	0	2012
WaW_241	Nepal	NPL	LIC	Bharatpur	NPL.1.3.2.5_1	4	1	There are three Bharatpur's this was added to BharatpurN.P. as better match with city and population	0.400062	2012	25.4	2012	5.61	2012			0	2012	0	2012	0	2012	0	2012
WaW_242	Nepal	NPL	LIC	Birgunj	NPL.1.3.4.20_1	4	1		0.698397	2012	39.3	2012	14.4629	2012			0	2012	0	2012	0	2012	0	2012
WaW_243	Nepal	NPL	LIC	Butwal	NPL.5.3.6.14_1	4	2	Data population is larger than GIS but area seems to match with city boundaries well. The difference in population is believed to come from innacuracy in the locaiton of the population distriution in GIS.	0.357653	2012	62.7	2012	13.46	2012			0	2012	0	2012	0	2012	0	2012
WaW_244	Nepal	NPL	LIC	Dharan	NPL.2.1.5.18_1	4	2	Data population is higher than GIS but this is believed to be inaccuracies in the location of the population distribution in GIS dataset.	0.618099	2012	68.7	2012	16.19	2012			0	2012	0	2012	0	2012	0	2012
WaW_245	Nepal	NPL	LIC	Bhaktapur	NPL.1.1.1.3_1	4	1		0.399369	2012	86.5	2012	13.2387	2012			0	2012	0	2012	0	2012	0	2012
WaW_246	Nepal	NPL	LIC	Dhankuta	NPL.2.1.2.15_1	4	1	There are two Dhankuta's this was added to DhankutaN.P. as better match with city and population	0.321694	2012	81.1	2012	17.85	2012			0	2012	0	2012	0	2012	100	2012
WaW_247	Nepal	NPL	LIC	Bhimeshwor	NPL.1.2.2.4_1	4	1	There is a Bhimeshwor and a BhimesworN.P.. This data was added to the latter as it covers the municipality of Bhimeswor and has a similar population.	0.121695	2012			8.17	2012
WaW_248	Nepal	NPL	LIC	Badimalika	NPL.3.2.3.24_1	4	1	Called Martadi in GADM dataset	0.131268	2016			6.87069	2016			0	2016	0	2016	0	2016	0	2016
WaW_249	Netherlands	NLD	HIC	Amsterdam	NLD.9.4_1	2	1		1.11153	2013			6.4	2013			0	2013	14	2013	0	2013	0	2013
WaW_250	Netherlands	NLD	HIC	Eindhoven	NLD.8.21_1	2	1						13.5922
WaW_251	New Zealand	NZL	HIC	Wellington	NZL.18.8_1	2	2	GIS population bigger than data. Data has some questionable values such as 38% plastic and 40% waste collection coverage	2.16388	2010	40	2010	38	2010			1	2010	10	2010	0	2010	98.8764	2010
WaW_252	New Zealand	NZL	HIC	Auckland	NZL.1.1_1	2	1		0.438356	2011			11.2	2011			0	2011	0	2011	0	2011	0	2011
WaW_253	Nicaragua	NIC	LMC	Managua	NIC.13.2_1	2	1		1.28031	2012	82	2012	8.37	2012			0	2012	0	2012	0	2012	0	2012
WaW_254	Nicaragua	NIC	LMC	Puerto Cabezas	NIC.1.3_1	2	1		0.587889	2012	23.65	2012	6.66667	2012			0	2012	0	2012	0	2012	0	2012
WaW_255	Niger	NER	LIC	Niamey	NER.5.1.1_1	3	1		0.490196	2003	28	2003	2	2003			0	2003	0	2003	0	2003	0	2003
WaW_256	Nigeria	NGA	LMC	Ilorin			4	No data to add
WaW_257	Nigeria	NGA	LMC	Lagos	NGA.25_1	1	2	Data added to Lagos State (lv 1) rather than default local authority level (Lv 2) as this data is for all of Lagos where the local authorities cover several different parts of the city. This provided a better match between the GIS population and data population, however the former is lsightly larger due to the state boundary covering some areas outside of the city.	0.5	2014	10	2014	15	2014
WaW_258	Nigeria	NGA	LMC	Kano	NGA.20.21_1	2	3	Kano split into both a state, and several local authorities within the city. As no population provided it is unclear which administrative boundary to add it to, Kano (lv2) chosen however this only aligns with a small part of the city.					4
WaW_259	Nigeria	NGA	LMC	Oyo	NGA.31.30_1	2	2	Oyo is split into Oyo East and Oyo West. This data was added to Oyo West as appears to cover more of the city and has a larger population, therefore better matching with the data.	0.170169	2008			18.8	2008
WaW_260	Nigeria	NGA	LMC	Ibadan	NGA.31.6_1	2	2	Ibadan is split into several local authorities. This data was added to Ibadan North as this appeared to cover a larger are of the city and had the highest population.	0.550546	2012	40	2012	9	2012			0	2012	0	2012	0	2012	0	2012
WaW_261	Northern Mariana Islands	MNP	HIC	Saipan	MNP.3_1	1	1		1.81	2009
WaW_262	Norway	NOR	HIC	Oslo	NOR.12.1_1	2	2	Data population more than GIS population as likely covers wider metropolitan area of Oslo	1.00274	2013	100	2013	5	2013			0	2013	37.197	2013	57.85	2013	99.8789	2013
WaW_263	Norway	NOR	HIC	Bergen	NOR.7.4_1	2	1		0.710528	2014			8	2014			0	2014	46.4	2014	39.1	2014	100	2014
WaW_264	Oman	OMN	HIC	Muscat	OMN.11_1	1	2	Based on population this data does not seem to fit any of the default Level 2 Wilayat. It is instead added to level 1 Muscat province as seems a better match, the default remains level 2 as this is the municipality level	0.71599	2017
WaW_265	Pakistan	PAK	LMC	Karachi	PAK.8.2_1	2	1	Added to level 2 despite default being level 3 as better matched data population	0.832755	2016	60	2016	6.38086	2016			0	2016	0	2016	0	2016	60	2016
WaW_266	Pakistan	PAK	LMC	Lahore			4	Population of data is higher than GIS.					0.6086				0		0
WaW_267	Pakistan	PAK	LMC	Sialkot	PAK.7.4.8_1	3	3	GIS population significantly more than data population but also covers area larger than the city	0.42332	2010	25	2010	12.8	2010			0	2010	0	2010	0	2010	0	2010
WaW_268	Palau	PLW	HIC	Koror	PLW.6_1	1	1	Plastic seems very high	0.319099	2010			48	2010
WaW_269	Panama	PAN	HIC	Panama City	PAN.12.6_1	2	1		1.17365	2010	83.5	2010	12	2010			0	2010	2	2010	0	2010	66.3265	2010
WaW_270	Panama	PAN	HIC	San Miguelito	PAN.12.7_1	2	1		1.00022	2010	97.5	2010					0	2010	0	2010	0	2010	100	2010
WaW_271	Panama	PAN	HIC	Colon	PAN.4.2_1	2	1		0.874201	2010	74.8	2010					0	2010	0	2010	0	2010	0	2010
WaW_272	Papua New Guinea	PNG	LMC	Port Moresby	PNG.15.1_1	2	1		0.852174	2016	63.26	2016	18.5	2016			0	2016	0	2016	0	2016	62.6246	2016
WaW_273	Paraguay	PRY	UMC	Asuncion	PRY.4.1_1	2	1		1.5987	2010	92.2	2010	4.2	2010			0	2010	0	2010	0	2010	0	2010
WaW_274	Paraguay	PRY	UMC	Ciudad Del Este	PRY.2.1_1	2	1		1.42239	2010	89.99	2010	10.2897	2010			0	2010	0	2010	0	2010	48.8	2010
WaW_275	Paraguay	PRY	UMC	San Lorenzo	PRY.9.15_1	2	1		1.75259	2010	58.2	2010	12	2010			0	2010	0	2010	0	2010	0	2010
WaW_276	Peru	PER	UMC	Cusco	PER.8.7_1	2	1	Added to level 2 as better matches city boundaries	1.19498	2011			11.63	2011			0	2011	0.3	2011	0	2011	0	2011
WaW_277	Philippines	PHL	LMC	Quezon City	PHL.47.14_1	2	1		0.926316	2014	95	2014	9.63904	2014			0	2014	0	2014	0	2014	100	2014
WaW_278	Philippines	PHL	LMC	Cebu	PHL.25.17_1	2	1		0.682557	2016	100	2016	15	2016			0	2016	0	2016	0	2016	40	2016
WaW_279	Poland	POL	HIC	Krakow	POL.6.6_1	2	1		1.18466	2016			14.59	2016			0	2016	33	2016	0	2016	0	2016
WaW_280	Poland	POL	HIC	Lodzi	POL.3.7_1	2	1	Also called Lodz	0.590383	2015
WaW_281	Portugal	PRT	HIC	Lisbon	PRT.12.7_1	2	1	Also called Lisboa	1.56193	2014			13	2014			0	2014	21.8	2014	0	2014	0	2014
WaW_282	Portugal	PRT	HIC	Guimaraes	PRT.4.8_1	2	1		0.970428	2015	100	2015	13.3024	2015
WaW_283	Qatar	QAT	HIC	Doha	QAT.1_1	1	1	Also called Ad Dawhah	1.37	2015	100	2015
WaW_284	Romania	ROU	UMC	Bucharest	ROU.10.1_1	1 OR 2	1	Also called Municipiul Bucuresti	0.928202	2014	100	2014	9.42	2014					9.44	2014
WaW_285	Romania	ROU	UMC	Cluj-Napoca	ROU.14_1	1	1	Added to level 1 as believed to be level more likely at which waste is managed	0.940003	2016	100	2016	9	2016
WaW_286	Russia	RUS	UMC	Kemerovo	RUS.27.10_1	2	1		0.972803	2016			13	2016			0	2016	1.9	2016	0	2016	0	2016
WaW_287	Russia	RUS	UMC	Moscow	RUS.43_1	1	1	Added to level 1 as better fit	1.31476	2011			13	2011			0	2011	0	2011	0	2011	0	2011
WaW_288	Russia	RUS	UMC	St petersburg	RUS.14.1_1	2	1		1.26204	2013			5.8	2013			0	2013	0	2013	0	2013	0	2013
WaW_289	Rwanda	RWA	LIC	Kigali	RWA.5_1	1	1	Data added to level 1 as waste is managed at a different level in Kegali according to https://www.igi-global.com/gateway/chapter/240081	1.9	2012	42	2012	1.50045	2012			0	2012	0	2012	0	2012	25	2012
WaW_290	Rwanda	RWA	LIC	Nyagatare	RWA.3.6_1	2	1				29
WaW_291	Samoa	WSM	UMC	Upolu (Apia)	WSM.9_1	1	2	Slight mismatch between population of data and GIS due to it being unclear if the data is for the island of Upolu or the city Apia. Administrative boundaries do not match well with either.			90		13.0452
WaW_292	Saudi Arabia	SAU	HIC	Jeddah	SAU.11_1	1	2	Data population is less than GIS due to GIS area being larger than city	1.47875	2015	100	2015	16	2015
WaW_293	Saudi Arabia	SAU	HIC	Riyadh	SAU.7_1	1	1		1.88383	2015			13.3	2015			0	2015	0	2015	0	2015	85	2015
WaW_294	Senegal	SEN	LIC	Rufisque	SEN.1.4.1_1	3	2	Data population is slightly more than GIS	0.7	2004	36	2004
WaW_295	Serbia	SRB	UMC	Novi Sad	SRB.5.6_1	2	1		1.05313	2012	100	2012	12.0824	2012			0	2012	0	2012	0	2012	0	2012
WaW_296	Serbia	SRB	UMC	Belgrade	SRB.3_1	1	1	Data added to level 1 as better match	1.80913	2012	85	2012	14.9185	2012
WaW_297	Sierra Leone	SLE	LIC	Freetown	SLE.4.2.1_1	2 OR 3	1		0.56	2012	45	2012	9.24025	2012
WaW_298	Slovakia	SVK	HIC	Trnava	SVK.7.7_1	2	2	Data population smaller than GIS population as GIS area covers area bigger than just the city	2.54241	2010			5.77942	2010			0	2010	9.79	2010	0.339962	2010	99.3769	2010
WaW_299	Slovakia	SVK	HIC	Bratislava	SVK.2_1	1	1	Data added to level 1 as better match	0.926851	2013			8.80885	2013			0	2013	9.81	2013	41.02	2013	99.1255	2013
WaW_300	Slovenia	SVN	HIC	Ljubljana	SVN.7.14_1	2	1		0.880615	2014	99	2014					0	2014	61	2014	0	2014	100	2014
WaW_301	Solomon Islands	SLB	LMC	Honiara	SLB.4_1	1	1		1.01862	2014	60	2014	19.5	2014
WaW_302	Somalia	SOM	LIC	Hargeysa	SOM.18.3_1	2	1		0.361084	2008			16	2008
WaW_303	South Africa	ZAF	UMC	Johannesburg	ZAF.3.1.1_1	2 OR 3	1		1.68132	2017	68.6	2017					5	2017	0	2017	0	2017	0	2017
WaW_304	South Africa	ZAF	UMC	Cape Town	ZAF.9.3.1_1	2 OR 3	1		1	2012			6	2012
WaW_305	South Africa	ZAF	UMC	Soweto			4	Falls within the City of Johannesburg there ommited
WaW_306	South Africa	ZAF	UMC	Bloemfontein	ZAF.2.3.1_1	2 OR 3	2	Also called Mangaung. GIS population slightly bigger due to coerving an area larger than just the city					17.7				0		0		0		32.3
WaW_307	South Africa	ZAF	UMC	Durban	ZAF.4.2.1_1	2 OR 3	1	Also called Ethekwini	1.42192	2007			17.4	2007
WaW_308	South Sudan	SSD	LIC	Juba	SSD.1.1.1_1	1 OR 2 OR 3	1		1.11	2013			20	2013
WaW_309	Spain	ESP	HIC	Madrid	ESP.8.1.3_1	3	1	Added to level 3 despite data fitting better at level 4 as it is believed most of Spain operates waste management at lv3 (comarca) level.	2.29589	2014			10.4021	2014			15	2014	10	2014	10	2014	100	2014
WaW_310	Spain	ESP	HIC	Pamplona	ESP.9.1.9_1	3	1	Added to level 3 despite data fitting better at level 4 as it is believed most of Spain operates waste management at lv3 (comarca) level.	1.9786	2014			8.19181	2014			0	2014	32	2014	0	2014	100	2014
WaW_311	Sri Lanka	LKA	LMC	Colombo	LKA.5.1_1	2	1		2.43674	2016	93	2016	9.18164	2016			0.970291	2016	0	2016	0	2016	0	2016
WaW_312	Sri Lanka	LKA	LMC	Dehiwala-Mount Lavinia Municipal Council	LKA.5.2_1	2	1		0.978495	2016	95.4	2016	10.5105	2016			0.539374	2016	0	2016	0	2016	0	2016
WaW_313	Sri Lanka	LKA	LMC	Moratuwa	LKA.5.9_1	2	1		0.72716	2016	71	2016	10.5105	2016			18.7583	2016	0	2016	0	2016	79.0244	2016
WaW_314	Sri Lanka	LKA	LMC	Jaffna	LKA.9.4_1	2	1		1.27127	2016	80.7	2016	4	2016			6.57016	2016	0	2016	0	2016	0	2016
WaW_315	Sri Lanka	LKA	LMC	Trincomalee	LKA.24.10_1	2	1		1.23518	2016	65.6	2016	3	2016			5.83942	2016	0	2016	0	2016	0	2016
WaW_316	Sri Lanka	LKA	LMC	Kurunegala	LKA.14.15_1	2	1		1.89872	2016	93.2	2016	6.19381	2016			3.14685	2016	0	2016	0	2016	0	2016
WaW_317	Sweden	SWE	HIC	Stockholm	SWE.15.18_1	2	1		1.21813	2013	100	2013	10.1898	2013			0	2013	21	2013	71.0101	2013	100	2013
WaW_318	Sweden	SWE	HIC	Boras	SWE.21.6_1	2	1		0.659085	2012	100	2012	7.04225	2012			0	2012	29	2012	54.6154	2012	100	2012
WaW_319	Switzerland	CHE	HIC	Bern	CHE.6.3_1	2	2	Data population bigger than GIS but areas seems to match	0.451519	2016									43.22	2016
WaW_320	Switzerland	CHE	HIC	Zurich			4	No Useful data
WaW_321	Syria	SYR	LIC	Damascus	SYR.5.1_1+SYR.13.6_1	2	2	Data population suggest this could be two level 2 areas of Damascus	1.16913	2016			6.9	2016
WaW_322	Tajikistan	TJK	LIC	Dushanbe	TJK.1.1_1	2	1	Added to level 2 as better fit	1.03637	2014	94.58	2014
WaW_323	Tajikistan	TJK	LIC	Khujand	TJK.4.3_1	2	1	Added to level 2 despite level 3 being a better population match, as matches the city boundaries better	0.982946	2010	31.57	2010	10	2010
WaW_324	Tanzania	TZA	LIC	Dar Es Salaam	TZA.2_1	1	1	Data added to Level 1 despite default being level 2 as better matched data.	0.939389	2011	49	2011	1.99402	2011									57.5071	2011
WaW_325	Tanzania	TZA	LIC	Moshi	TZA.9.3_1	2	1		0.92633	2008	61	2008	9	2008			28.9855	2008	0	2008	0	2008	100	2008
WaW_326	Tanzania	TZA	LIC	Mountain Kilimanjaro	TZA.9.5_1	2	2	Data added to Rombo district as this incorpotates the peak of Mount Kilimanjaro however unclear if the data is for only this area.	0.652316	2006			24	2006
WaW_327	Thailand	THA	UMC	Bangkok	THA.3_1	1	1	Added to level 1 despite default being level 3 as better fit	1.23834	2015	100	2015	25.0125	2015			55.2467	2015					100	2015
WaW_328	Timor-Leste	TLS	LMC	Dili	TLS.7_1	1	1		0.64012	2016			17.8218	2016
WaW_329	Togo	TGO	LIC	Lome	TGO.3.1_1	2	2	Data population lower than GIS but reasonable match	0.891271	2014	64	2014	0	2014
WaW_330	Tonga	TON	UMC	Vavau	TON.5_1	1	1		1.01162	2012			13.4	2012			1.5	2012	5.1	2012	0	2012	29.3362	2012
WaW_331	Tonga	TON	UMC	Tongatapu	TON.4_1	1	1		1.08364	2012	40	2012	13.4	2012
WaW_332	Tunisia	TUN	LMC	Sfax	TUN.17_1	1	2	Data added to Level 1 as better matched data	0.703196	2013			11	2013									100	2013
WaW_333	Tunisia	TUN	LMC	Tunis	TUN.23_1	1	2	Data added to Level 1 as better matched data	0.861057	2012	61	2012	10.1055	2012									95.7542	2012
WaW_334	Tunisia	TUN	LMC	Sousse	TUN.20_1	1	2	Data added to Level 1 as better matched data	1.12812	2008	99	2008	9	2008			0	2008	0	2008	0	2008	100	2008
WaW_335	Turkey	TUR	UMC	Sakarya Mm	TUR.66_1	1	1	Data is for the metropolitan municipality which is at provincial level (Lv1)	1.06	2014			15.8841	2014					2.49	2014
WaW_336	Turkey	TUR	UMC	Bursa Metropolitan Municipality	TUR.21_1	1	1	Data is for the metropolitan municipality which is at provincial level (Lv1)	1.06	2014			15.4845	2014
WaW_337	Turkmenistan	TKM	UMC	Ashgabat	TKM.2_1	1	1		0.602299	2012			3	2012
WaW_338	Tuvalu	TUV	UMC	Funafuti	TUV.1_1	1	1				80		9.30931
WaW_339	Uganda	UGA	LIC	Kampala	UGA.16.1_1	2	1		1.18872	2014	65	2014	1.5984	2014			0	2014	0	2014	0	2014	100	2014
WaW_340	Ukraine	UKR	LMC	Kiev	UKR.11_1	1	1	Data added to regional level (Lv 1) despite default being level 2 as better matched with the city (Kiev is an independent city at the regional level)	1.02437	2016			7	2016			0	2016	0	2016	24.5726	2016	0	2016
WaW_341	Ukraine	UKR	LMC	Pavlograd	UKR.5.17_1	2	1		2.1093	2012	100	2012	12.5874	2012
WaW_342	United Arab Emirates	ARE	HIC	Abu Dhabi	ARE.1_1	1	2	Population of data is less than GIS	2.47303	2015	100	2015	19	2015			9	2015	20	2015	0	2015	12.6761	2015
WaW_343	United Arab Emirates	ARE	HIC	Dubai	ARE.3_1	1	2	Population of data is less than GIS	3.05149	2011	100	2011	24.247	2011			0	2011	25	2011	0	2011	100	2011
WaW_344	United Kingdom	GBR	HIC	London	GBR.1.36_1	2	1	The data for london is given at level 2 therefore added to this level.	1.20562	2012	99	2012	6	2012			0	2012	30	2012	46.338	2012	100	2012
WaW_345	United Kingdom	GBR	HIC	Bristol	GBR.1.12.1_1	3	1		1.01223	2015	100	2015	11.1111	2015			25.3	2015	45.03	2015	0	2015	100	2015
WaW_346	United States	USA	HIC	Washington Dc	USA.9.1_1	2	1	Also called District of Columbia	1.89471	2016			0	2016			33	2016	11	2016	0	2016	100	2016
WaW_347	United States	USA	HIC	Ann Arbor	USA.23.85_1	2	1	Added to the Level 2 'Washtenaw' county	1.79169	2012									31	2012
WaW_348	United States	USA	HIC	Seattle	USA.48.17_1	2	2	Also called 'King' in Washington State. Data population is significantly less than GIS population as GIS vector covers larger area	3.12834	2015	100	2015	11.523	2015			0	2015	58.04	2015	0	2015	100	2015
WaW_349	Uruguay	URY	HIC	Montevideo	URY.10_1	1	1		1.00068	2012	100	2012	15.8716	2012			0	2012	29	2012	0	2012	100	2012
WaW_350	Uzbekistan	UZB	LMC	Namangan			4	No data to add
WaW_351	Uzbekistan	UZB	LMC	Tashkent	UZB.13.1_1	2	2	Population data is much bigger than GIS data. This appears to be due to the GIS population raster not aligning correctly with the boundary of the city.	0.608558	2012			0	2012
WaW_352	Vanuatu	VUT	LMC	Port Vila	VUT.4_1	1	1	Data better matches level 2 but added at level 1 as more likely waste is managed at an iland level	1.67971	2012	60	2012	7.9	2012
WaW_353	Venezuela	VEN	UMC	Caracas	VEN.11.1_1	2	2	Also called 'Libertador' in 'Distrito Capital'. Data population is greater than GIS population but good match in area	1.52101	2010	100	2010	0	2010			0	2010	0.9	2010	0	2010	100	2010
WaW_354	Vietnam	VNM	LMC	Hanoi	VNM.27_1	1	2	Data population much smaller than GIS population due to GIS vector covering area larger than just the city.	1.8049	2014	92	2014	8.61723	2014			2.44051	2014					84.264	2014
WaW_355	Vietnam	VNM	LMC	Ho Chi Minh City	VNM.25_1	1	1		0.891192	2014	97	2014	15.8259	2014			15	2014	0	2014	0	2014	100	2014
WaW_356	Palestina	PSE	LMC	Ramallah			4	No data to add
WaW_357	Yemen	YEM	LIC	Sanaa	YEM.9_1	1	1	The municipality of the Capital Sana'a is called Amanat Al Asimah	0.857143	2016	70	2016	10	2016			0	2016	0	2016	0	2016	100	2016
WaW_358	Zambia	ZMB	LMC	Lusaka	ZMB.5.4_1	2	1		0.844709	2011	45	2011	7	2011			0	2011	0	2011	0	2011	27.6596	2011
WaW_359	Zambia	ZMB	LMC	Ndola	ZMB.2.10_1	2	1		0.52	2012			8.33083	2012
WaW_360	Zimbabwe	ZWE	LIC	Harare	ZWE.2.1_1	2	2	Data population lower than GIS but area matches well with the city boundaries	0.721649	2000	97	2000	18.1745	2000
WaW_361	Zimbabwe	ZWE	LIC	Gweru	ZWE.10.4_1	2	2	Data population lower than GIS due to GIS vector coverin area larger than the city boundaries	0.664176	2014	99	2014	10.2	2014
WaW_362	Zimbabwe	ZWE	LIC	Chinhoyi	ZWE.6.5_1	2	2	Within Makonde District. Data population lower than GIS due to GIS vector coverin area larger than the city boundaries	0.712329	2012	50	2012	8.6	2012
WaW_363	Zimbabwe	ZWE	LIC	Norton	ZWE.6.1_1	2	2	Within Chugutu District. Data population lower than GIS due to GIS vector coverin area larger than the city boundaries	0.657534	2012			9.1	2012
WaW_364	Zimbabwe	ZWE	LIC	Kariba	ZWE.6.4_1	2	2	Data population lower than GIS due to GIS vector coverin area larger than the city boundaries	0.767123	2012			11	2012
WaW_365	Zimbabwe	ZWE	LIC	Kadoma City	ZWE.6.3_1	2	3	Population not listed to cross check, but believed to be allocated correctly					7
WaW_366	Zimbabwe	ZWE	LIC	Mbare			4	Falls within Harare therefore omitted									10		0		0
WaW_367	Zimbabwe	ZWE	LIC	Masvingo City	ZWE.7.5_1	2	3	Population not listed to cross check, but believed to be allocated correctly					40
WaW_368	Zimbabwe	ZWE	LIC	Sakubva	ZWE.3.5_1	2	3	Within Mutare City and District. Population not listed to cross check, but believed to be allocated correctly.					23
UNSD_001	Algeria	DZA	UMC	Adrar	DZA.1_1	1	1	Combined pops of level 2 administrative constitiuents are roughly 550K in 2020 which is a pluasible match for the 510k stated in w2017 here	0.499597	2017	12	2015					1.09091	2015	0	2015	0	2015	43.9024	2015
UNSD_002	Algeria	DZA	UMC	Djelfa	DZA.16_1	1	1	Pop is close - looks like L1	0.752511	2017	100	2017					1	2015	0	2015	0	2015	43.9024	2015
UNSD_003	Algeria	DZA	UMC	Algiers	DZA.4_1	1	1	Although 2020 pop. = 4.35 million, this still seems a plausible fit as the census in 2007 said 3.4 million https://web.archive.org/web/20070930225838/http://www.world-gazetteer.com/wg.php?x=&men=gadm&lng=en&dat=32&geo=-66&srt=npan&col=aohdq	0.940392	2017	100	2017					1	2015	0	2015	0	2015	43.9024	2015
UNSD_004	Algeria	DZA	UMC	Wahran (Oran)	DZA.32_1	1	1	Pop is close - looks like L1	0.854854	2017	70	2015					1	2015	0	2015	0	2015	43.9103	2015
UNSD_005	Algeria	DZA	UMC	Qacentina (Constantine)	DZA.15_1	1	1	Pop in 2020 is 1.25million - close enough	0.801755	2017	80	2015					1	2015	0	2015	0	2015	44.0758	2015
UNSD_006	Argentina	ARG	UMC	La Matanza	ARG.1.62_1	2	1	Pop is 2.415 million in 2020 - plausible increase from 2010			91.9	2010
UNSD_007	Argentina	ARG	UMC	Córdoba	ARG.6_1	1	1	Pop is 3.6 million in 2020 - most plasible as city alone is only 1.3			93	2010
UNSD_008	Argentina	ARG	UMC	Buenos Aires	ARG.5_1	1	1	Must be the Ciudad de Buenos Aires which is 3 million inj 2020 - a plausible increase			97.7	2010
UNSD_009	Armenia	ARM	UMC	Gyumri	ARM.8_1	1	2	no area with tbis name so this is the larger region containing it (no smaller levels). 220k pop likely due to the larger area	0.257607	2019	100	2019					0	2019	0	2019	0	2019	100	2019
UNSD_010	Armenia	ARM	HIC	Vanadzor	ARM.7_1	1	2	larger area that contains vandazor but is wider with pop of 191k	0.161989	2019	100	2019					0	2019	0	2019	0	2019	100	2019
UNSD_011	Armenia	ARM	HIC	Yerevan	ARM.4_1	1	1	2020 pop is 998K on the GIS - so plausibly the same place	0.818692	2019	100	2019					0	2019	0	2019	0	2019	100	2019
UNSD_012	Azerbaijan	AZE	UMC	Baku	AZE.1.2_1	2	1	Pop is very plausibly similar to city with same name									6.27581	2019	0	2019	44.7564	2019	42.1585	2019
UNSD_013	Azerbaijan	AZE	UMC	Ganja	AZE.4.4_1	2	1	GIS pop is a bit low at 306K in 2020 - but still looks like a good fit									0	2017	0	2017	0	2017	0	2017
UNSD_014	Azerbaijan	AZE	UMC	Sumgaitww.	AZE.1.3_1	2	1	Again GIS pop is a bit low at 330K in 2020 - butooks like a good fit as above									0	2017	0	2017	0	2017	0	2017
UNSD_015	Belarus	BLR	UMC	Minsk	BLR.5.11_1	2	1	GIS pop is v close (2.15) in 2020 - the full level 1 area is 0.5 million greater	1.06103	2019	100	2019					0	2019	26.0026	2019	0	2019	100	2019
UNSD_016	Bhutan	BTN	LMC	Thimphu	BTN.14_1	1	3	130k on GIS, not sure on this one because the area seems to cover the town but cantr see reason for the large difference in pop	2.3893	2017	80	2019					10	2017	0	2017	0	2017	0	2017
UNSD_018	Bosnia and Herzegovina	BIH	UMC	Zenica	BIH.2.10.10_1	3	1	GIS pop is 107k in 2020 (118K on nthe map - is plausible	0.692247	2009	85	2009					4.0293	2009	0	2009	0	2009	100	2009
UNSD_019	Bosnia and Herzegovina	BIH	UMC	Sarajevo	BIH.2.6_1	2	1	GIS pop in 2020 is 397k - a bit less than reported here fopr 2009									0	2015	0	2015	0	2015	100	2015
UNSD_020	Botswana	BWA	UMC	Gaborone	BWA.4_1	1	2	GIS pop is circa 60K and surrounding polygons can't be obviously summed to make up the 264K - suspect a larger metropplitan area exists not seen on the GIS dataset	0.807118	2017	100	2017					0	2017	0	2017	0	2017	0	2017
UNSD_021	Botswana	BWA	UMC	Francistown	BWA.3_1	1	1	near enough for Jazz	2.15372	2017	100	2017					0	2017	0	2017	0	2017	0	2017
UNSD_022	Brazil	BRA	UMC	Brasília	BRA.7.1_1	2	1	familiar with these - they look good	1.60222	2014	99	2015					4.21778	2015	0	2015	0	2015	100	2015
UNSD_023	Brazil	BRA	UMC	Salvador	BRA.5.336_1	2	1	familiar with these - they look good	0.914177	2012	96.7	2015					0.0104426	2009	0	2012	0.00224478	2012	0	2012
UNSD_024	Brazil	BRA	UMC	São Paulo	BRA.25.564_1	2	1	familiar with these - they look good	1.23042	2014	100	2015					0.0543053	2014
UNSD_025	Brazil	BRA	UMC	Rio de Janeiro	BRA.19.67_1	2	1	familiar with these - they look good	1.41133	2014	100	2015					0.0552967	2015	0.0913465	2015	0	2015	0	2015
UNSD_026	Brazil	BRA	UMC	Porto Alegre	BRA.21.305_1	2	1	familiar with these - they look good	1.11897	2014	100	2015					0.267003	2015	0	2015	0	2015	0	2015
UNSD_027	Burkina Faso	BFA	LIC	Ouagadougou	BFA.7.1_1	2	2	Data matches Lv 2 & 3 reasonably well, perhaps slightly better match at lv3 but believed Lv2 is more likely to represent the level at which waste is managed so chosen instead			81	2014
UNSD_028	Burundi	BDI	LIC	Bujumbura	BDI.2_1	1	3	Bujumbura is a port city, two parts main city is bujumbura marine surrounded by bujumbura rural. Marine has pop of 890k. Could be plausible increase given the longer time frame. Google says 374k pop 2021 though so seems a bit confusing. Other data says 412k									0	2017	0	2017	0	2017	0	2017
UNSD_029	Cape Verde	CPV	LMC	São Vicente	CPV.20_1	1	1	GIS says 81K in 2020 - near enough for Jazz	1.27114	2015	100	2015					0	2015	0	2015	0	2015	0	2015
UNSD_030	Cape Verde	CPV	LMC	Sal	CPV.11_1	1	2	22k pop on GIS but is the correct island	0.983899	2015	99.8	2015					0	2015	0	2015	0	2015	100	2015
UNSD_031	Cape Verde	CPV	LMC	Praia	CPV.7_1	1	1		0.734456	2019	100	2019					0	2015	0	2015	0	2015
UNSD_032	Cameroon	CMR	LMC	Douala	CMR.5.4_1	2	1	pop of 3.4 million GIS seems the best cover of the area			58.33	2009					0	2009	0	2009	0	2009	98.3639	2009
UNSD_033	Central African Republic	CAF	LIC	Bangui	CAF.2.1_1	2	3	only covers a small part of the city so this has caused GIS to be 277k pop much lower. Level one and two are the same so use 2 as default	0.327789	2009	32	2009
UNSD_034	Chad	TCD	LIC	N'Djamena	TCD.22_1	1	2	2020 pop is 1.4 million - on the GIS - is a steep but plausible increase in a decade	0.739726	2009	45	2009					0	2009	0	2009	0	2009	0	2009
UNSD_035	China	CHN	UMC	Shanghai	CHN.24.1_1	2	2	GIS says 32 mill pop google says 26mill, GIS looks like a slightly larger area, but covers the whole of shanghai									5.7021	2019	0	2019	65.6275	2019	0	2019
UNSD_036	China	CHN	UMC	Chongqing	CHN.3.1_1	2	2	Population best matches with Lv 2 but GADM boundary much bigger than city									0.714523	2019	0	2019	50.5816	2019	0	2019
UNSD_037	China	CHN	UMC	Beijing (Peking)	CHN.2.1_1	2	2	28.5mill pop GIS, bit of a big gap but seems to be in the right place maybe boundry a bit wide									16.8117	2019	0	2019	48.9419	2019	0	2019
UNSD_038	Hong Kong	HKG	HIC	Hong Kong	HKG	0	1	Controversially, country level 0 is close (7.121 million in 2020)	2.13115	2014	100	2015					0	2015	35.4119	2015	0	2015	0	2015
UNSD_039	Macao	MAC	HIC	Macao	MAC	0	1	Controversially, country level 0 is close (600K in 2020)	2.04957	2014	100	2015							0.597725	2015	77.1683	2015	100	2017
UNSD_040	Costa Rica	CRI	UMC	San José	CRI.7.15_1	2	3	199k on GIS. GIS area seems to cover only part of san jose but is more representative than the level 1.	1.08035	2008	100	2008					0	2007	0	2007	0	2007	100	2007
UNSD_041	Croatia	HRV	HIC	Rijeka	HRV.13.34_1	2	1	107k on GIS 2020 seems okay as a change and is in the right place	0.590246	2012	100	2012					0	2012	23.627	2012	0	2012	100	2012
UNSD_042	Croatia	HRV	HIC	Split	HRV.16.43_1	2	1	has 157K on GIS in 2020 which is pl;ausible	0.894218	2012	100	2012					0	2012	1.30846	2012	0	2012	100	2012
UNSD_043	Croatia	HRV	HIC	Zagreb	HRV.4.7_1	2	1	has 794 in 202 which is a plausible increase	1.02406	2012	100	2012					6.07972	2012	2.33158	2012	0	2012	100	2012
UNSD_044	Cuba	CUB	UMC	Camagüey	CUB.1.1_1	2	1	has 323K in 2020 which is a plausible increase	1.92434	2017	100	2017					0.976744	2017	3.86047	2017	0	2017	100	2017
UNSD_045	Cuba	CUB	UMC	Habana	CUB.4_1	1	1	GIS nearly 2 mill for Cuidad de la Habana (province). Note: La Habana (bordering province) 377k so this Habana could be an addition of both but not certain so assume cuidad de la Habana as more than 90% of the popualtion	2.38676	2017	100	2017					0	2017	0	2017	0	2017	100	2017
UNSD_046	Dominican Republic	DOM	UMC	Pedro Brand	DOM.31.4_1	2	1	GIS says 98K nearly 50% greater , however dat is older- this a suburb of a big city so potential inaccuracy in GIS data distribution	0.49202	2010	72.77	2010					0	2015	0	2015	0	2015	100	2015
UNSD_047	Dominican Republic	DOM	UMC	Los Alcarrizos	DOM.31.3_1	2	1	Matches perfectly with the area shown by google when searched for	0.609798	2010	82	2010					0	2015	0	2015	0	2015	100	2015
UNSD_048	Dominican Republic	DOM	UMC	Santo Domingo Oeste	DOM.31.7_1	2	2	GIS population slightly higher but possible	0.983376	2010	91.16	2010					0	2015	0	2015	0	2015	100	2015
UNSD_049	Dominican Republic	DOM	UMC	Santo Domingo Norte	DOM.31.6_1	2	2	GIS is 887k seems a large increase could be due to it being the suburb of a big city	0.67774	2010	76.91	2010					0	2015	0	2015	0	2015	100	2015
UNSD_050	Dominican Republic	DOM	UMC	Santiago De Los Caballeros	DOM.30.6_1	2	2	GIS is 803k looks as though the boundry spreads beyond the border of the main city may be thee reason for this increase			87.34	2010
UNSD_051	Dominican Republic	DOM	UMC	San Pedro De Macoris	DOM.27.6_1	2	1	GIS is 277k k seems a large increase but the boundry does spread a lot wider than the central area			86.96	2010
UNSD_052	Dominican Republic	DOM	UMC	Santo Domingo Este	DOM.31.5_1	2	1	1.17 mill on GIS seems plausible	1.09189	2010	82.15	2010					0	2015	0	2015	0	2015	100	2015
UNSD_053	Dominican Republic	DOM	UMC	Distrito Nacional (Capital de la República)	DOM.5.1_1	2	1		2.29717	2010	92	2010					0	2015	0	2015	0	2015	100	2015
UNSD_054	Ecuador	ECU	UMC	Quito	ECU.19.6_1	2	1	Slightly better match at Lv3 but Lv2 more likely to represent level at which waste is managed so chosen here instead	1.20583	2017	95.8056	2017							0.857507	2012
UNSD_055	Ecuador	ECU	UMC	Guayaquil	ECU.10.11_1	2	1	Reasonable population match	1.3206	2017	96.3408	2017
UNSD_056	Ecuador	ECU	UMC	Cuenca	ECU.1.3_1	2	1	Slightly better match at Lv3 but Lv2 more likely to represent level at which waste is managed so chosen here instead	0.827862	2017	96.7746	2017							0.496976	2012
UNSD_057	Gambia	GMB	LIC	Banjul	GMB.1.2_1	2	2	28k on GIS in 2020 since the sata set is from 2009 this may be plausble. Also the L1 city is made of 2 districts (banjul and Kanifing), perhaps the boundry could have changed/ large areas of the land seem uninhabited/flood prone									0	2009	0	2009	0	2009	0	2009
UNSD_058	Georgia	GEO	LMC	Kutaisi	GEO.4.5_1	2	3	92k on GIS in 2020 this seems a large reduction. Looks as though the area does not cover the majority of the city and quite dense populations on the outer boundry of the area, need to check			95	2007
UNSD_059	Georgia	GEO	LMC	Batumi	GEO.2.1_1	2	1	198k GIS seems plausible increase	1.28951	2017	98.7	2017					0	2017	0	2017	0	2017	100	2017
UNSD_060	Georgia	GEO	LMC	Tbilisi	GEO.12.1_1	2	1	1.05 mill GIS within 10% decrease so seems plausible	0.950746	2017	100	2017					0	2017	0	2017	0	2017	100	2017
UNSD_061	Ghana	GHA	LMC	Tamale	GHA.6.13_1	2	2	409k in GIS this is a lot higher, the area on map seems to cover much more than the city itself.	0.5	2017	70	2017					3.33468	2016	0	2017	0	2017	100	2017
UNSD_062	Ghana	GHA	LMC	Kumasi	GHA.1.16_1	2	2	3.36mill pop on GIS this is the right area but the boundry seems to include a lot of the surrounding areas of the city that are densly populated perhaps the 2mill is only for the cental area??	0.75	2017	85	2017					0	2017	0	2017	0	2017	85	2017
UNSD_063	Ghana	GHA	LMC	Accr	GHA.5.1_1	2	2	Pressume this is Accra not Accr. 3.15 mill in 2020 which seems a lot higher. Probably includes more than just accrra city but would be hard to determine which level 3s as would be a combination	0.7	2017	80	2017					8.27049	2016	0	2017	0	2017	0	2017
UNSD_064	Guatemala	GTM	LMC	Escuintla	GTM.6.1_1	2	1	176k seems a plausible increase.			50	2012					0	2012	0	2012	0	2012	50	2012
UNSD_065	Guatemala	GTM	LMC	Cobán	GTM.1.3_1	2	3	312k on GIS much much smaller 2018 census says around 200k pop. Coban is in level 1 area Alta Verapaz with 1.46mill pop on GIS could be a combination of this and another area surrounding coban ? Have put the unique ID as the level 2 because this covers the area of ther city best			19.51	2012					0	2012	0	2012	0	2012	83.3333	2012
UNSD_066	Guatemala	GTM	LMC	Villa Nueva	GTM.7.16_1	2	3	629k on GIS 2020, this was 2009 but still seems a very large increase. Area is surrounded by lots of smaller districts and seems to be on the edge of guatemala city itself. Perhaps some boundries have chanaged?			85.4	2006
UNSD_067	Guatemala	GTM	LMC	Mixco	GTM.7.5_1	2	1	507k on GIS 2020 seems a reasonable increase			82.2	2006
UNSD_068	Guatemala	GTM	LMC	Huehuetenango	GTM.8.10_1	2	2	GIS population smaller but covers the city			35	2009					0	2009	0	2009	0	2009	100	2009
UNSD_069	Guatemala	GTM	LMC	Quetzaltenango	GTM.13.16_1	2	1		1.19504	2012	95	2012					0	2012	0	2012	0	2012	0	2012
UNSD_070	Guatemala	GTM	LMC	Guatemala	GTM.7_1	1	3	City split into many disticts in lv2 but encompasses much larger area in lv1. Level 1 thought to be closest match			85	2006
UNSD_071	Guinea	GIN	LIC	Conakry	GIN.2.1_1	2	3	the GIS says 2020 pop is 1.9 mill. It looks as though there is a very dense population around the north side of the area so UN boundry could be different. Also the level 1 and level 2 are the same ( level 1 is the region, level 2 is the prefecture ) level 2 is default so this is used	0.241758	2007	76	2007					0	2007	0	2007	0	2007	0	2007
UNSD_072	Guyana	GUY	LMC	Georgetown	GUY.3_1	1	2	Chose level 1 as most likely level at which waste is managed			95	2009					0	2009	0	2009	0	2009	100	2009
UNSD_073	Iran	IRN	UMC	Tabriz	IRN.5.12_1	2	2	1.3 mill 2020 pop in GIS. The boundry seems to miss the east side of the city which explains the decrease	0.720715	2017	100	2017					0	2017			0	2017
UNSD_074	Iran	IRN	UMC	Tehran	IRN.28.8_1	2	1	Tehran is level 1 and has population of nearly 12 mill in 2020 (GIS). I think it is more likely that this is refering to Theran (central Terhan level 2) which has 2020 pop of 7.2 mill on GIS. Previous data feom waste sources calcuated pop of 8.4 mill also.	3.04212	2017	90	2017					4.55063	2017
UNSD_075	Iran	IRN	UMC	Mashhad	IRN.24.9_1	2	1	3.5 mill pop in 2020 on GIS seems plausible	0.788056	2017	100	2017					13.4441	2017	0	2017	0	2017	100	2017
UNSD_076	Iran	IRN	UMC	Esfahan	IRN.6.16_1	2	2	Esfahan L1 is pop 5.6 mill on GIS this looks like the entire province. The county of tiran and karvan has pop of 2.5 mill on GIS and this covers a lot of central Esfahan.	0.63337	2017	100	2017					30.8824	2017	6.72269	2017	0	2017	60.1594	2017
UNSD_077	Iraq	IRQ	UMC	Mosul	IRQ.16.6_1	2	2	2.6 mill pop on GIS boundry seems to cut through city centre a little so may be the reason for the under eastimate	1.14674	2019	53.3	2019
UNSD_078	Iraq	IRQ	UMC	Baghdad	IRQ.10_1	2	2	GIS has population as 5 mill seems like there are some very densly populated areas on the outskirts of the city not within this boundry. Previous data from waste sources estimates 7 mill pop.	1.23688	2019	81.5	2019
UNSD_079	Israel	ISR	HIC	Jerusalem	ISR.6_1	1	2	GIS estimates 1.2 mill pop boundry stretches much further than that of the main city- could explain the increase also 2008 is a much larger gap to 2020 than others									0	2009	4.99894	2009	0	2009	100	2009
UNSD_080	Israel	ISR	HIC	Tel Aviv-Yafo	ISR.7_1	1	3	GIS is 1.5 mil pop and previous data from waste sources 3.3 mill. Internet says pop of 435k in 2015. the GIS does include a slightly larger area than google maps but this is such a big change it is still confusing									0	2009	10.6205	2009	0	2009	100	2009
UNSD_081	Jordan	JOR	UMC	Zarqa	JOR.12_1	1	2	on GIS pop 893k slightly too large a jump but likely explained by the boundry of Zarqa being next to the city Amman and dense population spreads between the two									0	2017	0	2017	0	2017	0	2017
UNSD_082	Jordan	JOR	UMC	Irbid	JOR.5_1	1	2	1.4 mill on GIS could possibly include Ajlun which borders the area and has pop n193k but not sure									0	2017	0	2017	0	2017	0	2017
UNSD_083	Jordan	JOR	UMC	Amman	JOR.2_1	1	2	2.5 mill pop on GIS 2.4 mill on data from waste sources but 4,5 mill in 2016 cencus seems the dense population spreads further than the GIS boundry but this is quite a large change but seems to cover the correct place- best match									0	2017	0	2017	0	2017	0	2017
UNSD_084	Kazakhstan	KAZ	UMC	Astana	KAZ.2.14_1	2	1	As of 2019, Astana is now known as Nur-sultan. Previously it was also known as Akmola which is now the name of the region it is in. this can also be callled Aqmola and this is the GIS location name for the level 1. Nur-sultan is in the level 2 area Tselinogradskiy, which has 2020 GIS pop of 1.3 mill which is a plausible increase	0.764477	2019	100	2019					70.8212	2018	16.4096	2019	0	2019	11.4815	2019
UNSD_085	Kazakhstan	KAZ	UMC	Almaty	KAZ.1.3_1	2	1	1.6 mill pop on GIS boundry cuts out a small part of the city plausible population	0.711758	2019	100	2019					3.74947	2018	10.2062	2019	0	2019	0	2019
UNSD_086	Kenya	KEN	LMC	Nairobi	KEN.30_1	1	1	4.9 mill pop on GIS plausible increase	0.499997	2017	44	2012					0	2017	0	2017	0	2017	0	2017
UNSD_087	Kyrgyzstan	KGZ	LMC	Bishkek	KGZ.2_1	1 OR 2	1	L1 mand L2 are the same. 988K pop on GIS plausible increase	0.911091	2017	100	2017					0	2017	0	2017	0	2017	100	2017
UNSD_088	Lebanon	LBN	UMC	Tripoli	LBN.7.5_1	2	1	412k pop on GIS seems plausible increase	0.947797	2012	100	2012					0	2012	0	2012	0	2012	100	2012
UNSD_089	Lebanon	LBN	UMC	Beirut	LBN.3.1_1	2	1	863,695on GIS boarderline plausible increase, given the 2012 to 2020 jump, looks to be the correct location	3.03503	2012	100	2012					6	2012	0	2012	0	2012	100	2012
UNSD_090	Lesotho	LSO	LMC	Maseru	LSO.5_1	1	2	452k increase seems very large is a 14 year jump so would expect this to be higher, also the boundry covers a much wider area than Maseru.			30	2012
UNSD_091	Liechtenstein	LIE	HIC	Schaan	LIE.7_1	1	1	6000 pop 2020 GIS, plausible	1.1962	2019	100	2019					33.8406	2019	19.0307	2019	47.1287	2019
UNSD_092	Madagascar	MDG	LIC	Antananarivo	MDG.1.1.7_1	3	1	1mill pop on GIS seems plausible	0.578004	2007	88.4981	2009					8.27702	2007	0	2009	0	2007	0	2009
UNSD_093	Malaysia	MYS	UMC	Kuala Lumpur	MYS.4.1_1	2	3	No pop to check but appears to be same area									0	2019	0	2019	0	2019	0	2019
UNSD_094	Malaysia	MYS	UMC	Johore Bharu	MYS.1.2_1	2	3	No pop to check but appears to be same area									0	2019	0	2019	0	2019	0	2019
UNSD_095	Mauritius	MUS	UMC	Port Louis	MUS.8_1	1	2	pop 109k on GIS slightly large change but likely due to the extended time gap (2012-2020) also GIS area neglects small suburbs on outskirts									0	2012	0	2012	0	2012	0	2012
UNSD_096	Monaco	MCO	HIC	Monaco	MCO	0	2	26k pop in 2020 on GIS is a little bit low but seems the GIS is in the right place. Some very densly populated areas around the edge of the country boundry	2.21632	2017	100	2017					0	2017	10.1152	2017	89.9	2017
UNSD_097	Montenegro	MNE	UMC	Cetinje	MNE.6_1	1	1	15k pop in 2020 on GIS seems plausible	2.23095	2012	89	2012
UNSD_098	Montenegro	MNE	UMC	Podgorica	MNE.16_1	1	1	206k pop in 2020 on GIS seems plausible	1.50933	2012	80	2012					0	2009	0	2009	0	2009	100	2009
UNSD_099	Morocco	MAR	LMC	Marrakech	MAR.8.5_1	2	2	GIS is 1.5 mill pop. This is a bit high but there is a slightly higher time gap than other instances. Boundry spreads quite far north of marrakesh city	0.878382	2014	93	2014					0	2014	0	2014	0	2014	0	2014
UNSD_100	Morocco	MAR	LMC	Casablanca (Dar-El-Beida)	MAR.5.1_1	2	1	GIS says 4.28mill pop in 2020 this is a plausible increase for the time frame	1.16658	2014	100	2015							0	2015
UNSD_101	Morocco	MAR	LMC	Rabat	MAR.11.2_1	2	1	814k on GIS in 2020 seems a plausible increase			100	2014
UNSD_102	Myanmar	MMR	LMC	Yangon	MMR.15.4_1	2	2	GIS population lower than data but good match with city boundaries													1.87135	2017
UNSD_103	Myanmar	MMR	LIC	Mandalay	MMR.8.2.2_1	3	1				80	2007
UNSD_104	Nepal	NPL	LIC	Lalitpur	NPL.1.1.5.27 1	4	1	this pop looks 1000 times too big. Assuming this GIS pop is 296k and therefore a reasonable increase.			81.4772	2012					0	2012	0	2012	0	2012	100	2012
UNSD_105	Nepal	NPL	LIC	Kathmandu	NPL.1.1.3.31 1	4	2	1000 times too big again ?? GIS says 3.7mill in 2020 bit big, other data says 1 mill. GIS is in the right place			92.592	2012					0	2012	0	2012	0	2012	100	2012
UNSD_106	Nepal	NPL	LIC	Biratnagar	NPL.2.1.3.13 1	4	1	1000 times too big again ?? GIS is 226k which is plausible, location correct.			91.8265	2012					0	2012	0	2012	0	2012	0	2012
UNSD_107	Niger	NER	LIC	Zinder	NER.8.4.18_1	3	2	401k on GIS, seems a bit large, could be due to the large time gap, looks as though in the correct location	0.296591	2006	76.6	2007					0.0206058	2006	0	2006	0	2006	100	2006
UNSD_108	Niger	NER	LIC	Niamey	NER.5.1.1_1	3	1	1.2mill 2020 pop seems plausible			60	2019					0.0206058	2006	0	2019	0	2019	100	2006
UNSD_109	Panama	PAN	HIC	Panama (Distrito capital)	PAN.12_1	1	1	GIS says 1.5mill which is a plausible change, seems to be in the correct place	0.952186	2015	91.1	2015					0	2019	0	2019	0	2019	100	2019
UNSD_110	Panama	PAN	UMC	San Miguelito	PAN.12.7_1	2	1	385k on GIS 2020 seems plausible increase	0.891676	2010	98	2010					0	2015	0	2015	0	2015	100	2015
UNSD_111	Paraguay	PRY	LMC	Luque	PRY.9.10_1	2	1	301k pop 2020 on GIS seems a plausible increase			59.1911	2012
UNSD_112	Paraguay	PRY	LMC	San Lorenzo	PRY.9.15_1	2	1	279k pop 2020 on GIS seems plausible increase			73.2393	2012
UNSD_113	Paraguay	PRY	LMC	Capiatá	PRY.9.2_1	2	1	259k pop 2020 on GIS seems plausible increase			40.6622	2012
UNSD_114	Paraguay	PRY	LMC	Ciudad del Este	PRY.2.1_1	2	1	3.15k pop 2020 on GIS seems plausible increase			64.3624	2012
UNSD_115	Paraguay	PRY	UMC	Asunción	PRY.4.1_1	2	1	543k pop 2020 on GIS seems plausible increase			82.3	2017
UNSD_116	Peru	PER	UMC	Callao	PER.7.1_1	2	2	1.3mill pop 2020 seems slightly large increase very dense population around the boundry so the boundry could be slightly different. Level 1 and level 2 are the same- level 2 is default	0.814221	2019	99.6415	2019					0.129078	2019
UNSD_117	Peru	PER	UMC	Arequipa	PER.4.1_1	2	2	Covers the entire city whereas Lv3 breaks it down into regions			88.1163	2019					14.8895	2019
UNSD_118	Peru	PER	UMC	Lima	PER.15.1_1	2	1	10.5mill pop 2020 GIS seems plausible increase	0.911409	2019	89.7207	2019					0.0913141	2019	0.643182	2019	0	2019	100	2019
UNSD_119	Philippines	PHL	LMC	Manila	PHL.47.6_1	2	1	1.5mill pop 2020 GIS is within 25% reduction, bit odd to go down this much but could be due to the very small boundry of manila city	2.99556	2007	95	2007							0	2007
UNSD_120	Qatar	QAT	HIC	Al-Rayyan	QAT.5_1	1	3	No pop to check but appears to be same area			100	2019
UNSD_121	Moldova	MDA	LMC	Beltsy	MDA.2_1	1	2	called Balti also. Pop 96k little bit lower than would be expected, boundry looks to be right though	7.1138	2014	100	2015					0	2019	0	2019	0	2019	100	2019
UNSD_122	Samoa	WSM	LMC	Apia	WSM.9_1	1	2	Level 1 covers entirety of city but is much larger than city boundary also. Believed to be a better macth than Lv2 and more likely the level at which waste is managed			97.8	2015
UNSD_123	Senegal	SEN	LIC	Dakar	SEN.1_1	1	1	Population best matches with level 1									0	2015	0	2015	0	2015	0	2015
UNSD_124	Serbia	SRB	UMC	Nis	SRB.10.5_1	2	1	270k pop GIS 2020 seems plausible increase									0	2012	0	2012	0	2012	0	2012
UNSD_125	Serbia	SRB	UMC	Novi Sad	SRB.5.6_1	2	1	392K POP 2020 seems ok									0	2012	0	2012	0	2012	0	2012
UNSD_126	Serbia	SRB	UMC	Belgrade	SRB.3_1	1	1	1.7mil on GIS seems ok									0	2012	0	2012	0	2012	0	2012
UNSD_127	South Africa	ZAF	UMC	Soweto	ZAF.3.1_1	2 OR 3	2	out by factor of 1000?? seems to come under the city of johannesburg boundry (pop 5.8mill GIS). This covers a bit extra than just soweto so is probably the reason for the increase.	1.18065	2017	100	2017					2.58469	2017	7.4818	2017	0	2017
UNSD_128	South Africa	ZAF	UMC	Port Elizabeth	ZAF.1.7_1	2 OR 3	3	seems to be no specific ares is likely a sum of numbered level 4s but pop of this area is 1.3mill which is a lot higher than this area so is not the best match.	2.64965	2017	70	2017					0	2017	0	2017	0	2017
UNSD_129	South Africa	ZAF	UMC	Cape Town	ZAF.9.3_1	2 OR 3	1	4.7mill GIS seems plausible	0.851324	2017	100	2017					0.616808	2017	8.57764	2017	0	2017	100	2017
UNSD_130	Sri Lanka	LKA	UMC	Moratuwa	LKA.5.9_1	2	1	140k pop GIS reasonable change	0.67366	2007	90	2007					0	2017	0	2017	0	2017	100	2017
UNSD_131	Sri Lanka	LKA	LMC	Dehiwala-Mount Lavinia	LKA.5.2_1	2	1	168k pop Gis reasonable change	3.50278	2016	96	2007					6.23302	2016	0	2016	0	2016	100	2016
UNSD_132	Sri Lanka	LKA	LMC	Colombo	KLKA.5.1_1	2	2	336K Pop GIS quite a lot different seems that the city extends beyond this boundry so could contain parts of other areas	1.29701	2017	83.5443	2016					0	2016	0	2016	0	2016	0	2016
UNSD_136	Suriname	SUR	UMC	Paramaribo	SUR.7_1	1	2	230k pop GIS . Slightly lower than wanted but likely due to densly populated areas surrounding the boundry			44.48	2012
UNSD_137	Togo	TGO	LIC	Lomé	TGO.3.1_1	2	3	No pop to check but appears to be same area			70	2012
UNSD_138	Uganda	UGA	LIC	Kampala	UGA.16.1_1	2	1	1.7MILL GIS reasonable difference.	0.9	2017	92.0995	2017
UNSD_139	Ukraine	UKR	LMC	Kiev	UKR.11_1	1	1	I think this is kiev city 2.9mill pop so similar	1.3269	2019	100	2019							0	2019	13.8441	2019
UNSD_140	United Arab Emirates	ARE	HIC	Dubai	ARE.3_1	1	2	no pop but boundry covers the area well but also includes the greater dubhi area and no level two covering the entire city			100	2015					0	2017	24.5806	2017	0	2017	0	2017
UNSD_141	United Arab Emirates	ARE	HIC	Al-Sharjah	ARE.6_1	1	2	no pop but this is the boundry covering the main city									1.99958	2017	61.0225	2017	0	2017	0	2017
UNSD_142	United Arab Emirates	ARE	HIC	Abu Dhabi	ARE.1.1_1	2	1	no pop but this is the boundry covering the main city			100	2015					10.8492	2017	19.3937	2017	0	2017	0	2017
UNSD_143	Tanzania	TZA	LIC	Songea	TZA.22.5_1	2	2	289k pop GIS bit big of a pop difference but seems to be the correct location and boundry covwers a large area around the city.	1.75101	2014	46.94	2015					14.276	2015	0	2015	0	2015	1.08418	2015
UNSD_144	Tanzania	TZA	LIC	Rukwa	TZA.21.6_1	2	3	Rukwa is the name of the region ( pop 1.3mill GIS). The capital of Rukwa is Sumbawanga (pop 279k on GIS), more likely ??	1.64479	2014	59.2	2015
UNSD_145	Tanzania	TZA	LIC	Moshi	TZA.9.3_1	2	1	227k on GIS seems reasonable	0.709298	2014	85	2015					0	2015	0	2015	0	2015	0	2015
UNSD_146	Tanzania	TZA	LIC	Dodoma	TZA.3.4_1	2	3	No pop to check but appears to be same area									0	2011	0	2011	0	2011	0	2011
UNSD_150	Yemen	YEM	LMC	Ta'izz	YEM.21_1	1	2	Think this is a case of the level 1s being too big and level 2s too small. Will use the level; 1 area as would be hared to choose a level 2 area. Pop much bigger of this area at 3.7mill on GIS	0.833261	2012	91	2013					0	2013	0	2013	0	2013	100	2013
UNSD_151	Yemen	YEM	LMC	Aden	YEM.1_1	1	1	911k pop GIS so probably plausible	0.652632	2013	96	2013					0	2013	0	2013	0	2013	100	2013
UNSD_152	Yemen	YEM	LMC	Sana'a	YEM.19_1	1	2	1.5mill pop GIS 2020. seems a bit big but given the larger date gap and the map looking okay is likely the right place	0.641293	2013	95	2013					0	2013	0	2013	0	2013	100	2013
UNSD_153	Zimbabwe	ZWE	LIC	Rusape	ZWE.3.4_1	2	2	no boundry with this name looks to be in Makoni, 330k pop. Area seems much bigger			97	2015					0	2015	0	2015	0	2015	0	2015
UNSD_154	Zimbabwe	ZWE	LIC	Gwanda	ZWE.9.3_1	2	2	141pop covers much larger area than just gwanda but seems to be the right place	0.26006	2014	100	2015					0	2015	0	2015	0	2015	0	2015
UNSD_155	Zimbabwe	ZWE	LIC	Gokwe	ZWE.10.3_1	2	2	in gokwe south but again very large area 357k pop on GIS same issue as above									0	2015	0	2015	0	2015	0	2015
UNSD_156	Zimbabwe	ZWE	LIC	Chinhoyi	ZWE.6.5_1	2	2	this is in Makonde pop 273k no smaller level to be more precse	0.034115	2014	67.5	2015					0	2015	0	2015	0	2015	0	2015
UNSD_157	Zimbabwe	ZWE	LIC	Bulawayo	ZWE.1.1_1	2	1	630k pop 2020 GIS seems reasonable	0.246149	2014	97.3	2015					0	2015	0	2015	0	2015	0	2015
UNSD_158	Zimbabwe	ZWE	LIC	Bindura	ZWE.4.1_1	2	2	190k pop 2020 GIS, very big jump but quite large area surrounding the town. 2012 census has pop as 46k but boundry a lot smaller	0.275057	2014	87	2015					0	2015	0	2015	0	2015	0	2015
UNSD_159	Zimbabwe	ZWE	LIC	Victoria Falls	ZWE.8.3_1	2	2	found in the hwange district 159k pop 2020 GIS much larger area									0	2015	0	2015	0	2015	0	2015
UNSD_160	Zimbabwe	ZWE	LIC	Norton	ZWE.6.1_1	2	2	Chegutu, 320k pop much larger than Norton, same issue as other ZWE, other sources has pop as 58k	0.265426	2014	95	2015					0	2015	0	2015	0	2015	0	2015
UNSD_161	Zimbabwe	ZWE	LIC	Mutare	ZWE.3.5_1	2	2	491k pop on GIS, very large area covering way more than just the town.									0	2015	0	2015	0	2015	0	2015
UNSD_162	Zimbabwe	ZWE	LIC	Masvingo	ZWE.7.5_1	2	2	329k pop GIS, very large area covering way more than just the town			95	2015					0	2015	0	2015	0	2015	0	2015
UNSD_163	Zimbabwe	ZWE	LIC	Kwekwe	ZWE.10.5_1	2	2	337k pop GIS, very large area covering way more than just the town	1.00017	2014	91	2015					0	2015	0	2015	0	2015	10.5058	2015
UNSD_164	Zimbabwe	ZWE	LIC	Karima	ZWE.6.4_1	2	3	Thinking this is probably Kariba, similar pop on google and data from other waste sources to suggest. GIS says 80k pop but is a much larger area than just the town.	0.0190913	2014	100	2015					0	2015	0	2015	0	2015	0	2015
UNSD_165	Zimbabwe	ZWE	LIC	Kadoma	ZWE.6.3_1	2	2	no pop to compare to but looks to be in the right place but ios a much larger area than the google maps boundry			92	2015					7.83626	2015	0	2015	0	2015	0	2015
UNSD_166	Zimbabwe	ZWE	LIC	Harare	ZWE.2.1_1	2	2	2.3mill pop GIS bit over estimate but looks to be in the right place and boundry includes lots of suburb towns	0.706703	2014	76	2015					1.76843	2015	0	2015	0	2015	0	2015
UNSD_167	Zimbabwe	ZWE	LIC	Gweru	ZWE.10.4_1	2	2	270k pop GIS 2020, v large area covering more than just the town. Other source 158k pop so seems right	0.144969	2014	98	2015					5.76037	2015	0	2015	0	2015	0	2015
SIPSN_01	Indonesia	IDN	LMC	Kota Pasuruan	IDN.11.16_1	2	1		0.637425	2020	67.3814	2020					0.0111932	2020	0.419699	2020			100	2020
SIPSN_02	Indonesia	IDN	LMC	Kota Yogyakarta	IDN.33.3_1	2	1		0.965747	2020	69.2461	2020					0.356126	2020	0.00312536	2020			0	2020
SIPSN_03	Indonesia	IDN	LMC	Cimahi	IDN.9.8_1	2	1		0.480958	2020	84.4337	2020					0.602837	2020	0.23841	2020			0	2020
SIPSN_04	Indonesia	IDN	LMC	Kota Medan	IDN.32.9_1	2	1		0.7	2020	50.7615	2020					28.9142	2020	0.0138677	2020			0	2020
SIPSN_05	Indonesia	IDN	LMC	Padang	IDN.30.10_1	2	1		0.732212	2020	67.6072	2020					0.222222	2020	0	2020			0	2020
SIPSN_06	Indonesia	IDN	LMC	Palopo	IDN.26.14_1	2	1		0.57595	2020	46.9036	2020					1.76388	2020	4.42975	2020			100	2020
SIPSN_07	Indonesia	IDN	LMC	Jambi	IDN.8.3_1	2	1		0.70551	2020	74.165	2020					1.53033	2020	0.654197	2020			0	2020
SIPSN_08	Indonesia	IDN	LMC	Banjar Baru	IDN.13.2_1	2	1		0.580498	2020	78.5991	2020					2.0665	2020	0.30042	2020			100	2020
SIPSN_09	Indonesia	IDN	LMC	Bitung	IDN.29.1_1	2	1		0.7	2020	44.6356	2020					2.87165	2020	0.0609928	2020			100	2020
SIPSN_10	Indonesia	IDN	LMC	Ambon	IDN.19.1_1	2	1		0.779059	2020	60.2411	2020					0.641769	2020	0.0742474	2020			100	2020
MOHURD_001	China	CHN	UMC	Shahe	CHN.10.10.14_1	3	1	92% similarity score between GHS and MoHURD populations	0.611865	2019
MOHURD_002	China	CHN	UMC	Xincheng	CHN.10.1.19_1	3	2	70% similarity score between GHS and MoHURD populations	0.472411	2019
MOHURD_003	China	CHN	UMC	Chengde	CHN.10.3.1_1	3	2	78% similarity score between GHS and MoHURD populations	0.695013	2019
MOHURD_004	China	CHN	UMC	Cangzhou	CHN.10.2.2_1	3	1	88% similarity score between GHS and MoHURD populations	0.559038	2019
MOHURD_005	China	CHN	UMC	Houma	CHN.25.5.7_1	3	2	60% similarity score between GHS and MoHURD populations	0.470696	2019
MOHURD_006	China	CHN	UMC	Genhe	CHN.19.6.6_1	3	2	75% similarity score between GHS and MoHURD populations	0.600635	2019
MOHURD_007	China	CHN	UMC	Jining	CHN.19.9.3_1	3	2	74% similarity score between GHS and MoHURD populations	0.439849	2019
MOHURD_008	China	CHN	UMC	Jinzhou	CHN.18.4.3_1	3	2	66% similarity score between GHS and MoHURD populations	0.376288	2019
MOHURD_009	China	CHN	UMC	Chaoyang	CHN.18.3.2_1	3	1	90% similarity score between GHS and MoHURD populations	0.455612	2019
MOHURD_010	China	CHN	UMC	Yanji	CHN.17.9.8_1	3	2	64% similarity score between GHS and MoHURD populations	0.403181	2019
MOHURD_011	China	CHN	UMC	Qiqihar	CHN.11.9.9_1	3	2	61% similarity score between GHS and MoHURD populations	0.525524	2019
MOHURD_012	China	CHN	UMC	Suifenhe	CHN.11.8.7_1	3	2	71% similarity score between GHS and MoHURD populations	0.747885	2019
MOHURD_013	China	CHN	UMC	Yixing	CHN.15.9.5_1	3	2	73% similarity score between GHS and MoHURD populations	0.409896	2019
MOHURD_014	China	CHN	UMC	Yuyao	CHN.31.6.7_1	3	2	78% similarity score between GHS and MoHURD populations	0.938064	2019
MOHURD_015	China	CHN	UMC	Cixi	CHN.31.6.1_1	3	1	82% similarity score between GHS and MoHURD populations	0.54963	2019
MOHURD_016	China	CHN	UMC	Wenzhou	CHN.31.10.7_1	3	2	66% similarity score between GHS and MoHURD populations	0.91532	2019
MOHURD_017	China	CHN	UMC	Shengsi	CHN.31.8.4_1	3	2	63% similarity score between GHS and MoHURD populations	0.684758	2019
MOHURD_018	China	CHN	UMC	Taizhou	CHN.31.9.1_1	3	2	67% similarity score between GHS and MoHURD populations	0.778169	2019
MOHURD_019	China	CHN	UMC	Lishui	CHN.31.5.3_1	3	2	76% similarity score between GHS and MoHURD populations	0.514347	2019
MOHURD_020	China	CHN	UMC	Fuqing	CHN.4.1.2_1	3	1	80% similarity score between GHS and MoHURD populations	0.563459	2019
MOHURD_021	China	CHN	UMC	Sanming	CHN.4.7.8_1	3	1	94% similarity score between GHS and MoHURD populations	0.480908	2019
MOHURD_022	China	CHN	UMC	Jinjiang	CHN.4.6.4_1	3	2	79% similarity score between GHS and MoHURD populations	0.812312	2019
MOHURD_023	China	CHN	UMC	Nan'an	CHN.4.6.5_1	3	2	65% similarity score between GHS and MoHURD populations	0.642145	2019
MOHURD_024	China	CHN	UMC	Pingxiang	CHN.16.7.2_1	3	1	83% similarity score between GHS and MoHURD populations	0.506113	2019
MOHURD_025	China	CHN	UMC	Jiaoxian	CHN.23.10.3_1	3	2	62% similarity score between GHS and MoHURD populations	0.548544	2019
MOHURD_026	China	CHN	UMC	Tai an	CHN.23.12.4_1	3	2	62% similarity score between GHS and MoHURD populations	0.436247	2019
MOHURD_027	China	CHN	UMC	Xinwen	CHN.23.12.5_1	3	2	71% similarity score between GHS and MoHURD populations	0.403158	2019
MOHURD_028	China	CHN	UMC	Feicheng	CHN.23.12.2_1	3	2	75% similarity score between GHS and MoHURD populations	0.390741	2019
MOHURD_029	China	CHN	UMC	Gaoqing	CHN.23.17.1_1	3	2	68% similarity score between GHS and MoHURD populations	0.606076	2019
MOHURD_030	China	CHN	UMC	Xingyang	CHN.12.16.4_1	3	1	86% similarity score between GHS and MoHURD populations	0.475939	2019
MOHURD_031	China	CHN	UMC	Dengfeng	CHN.12.16.1_1	3	2	77% similarity score between GHS and MoHURD populations	0.501355	2019
MOHURD_032	China	CHN	UMC	Huixian	CHN.12.13.4_1	3	2	65% similarity score between GHS and MoHURD populations	0.629924	2019
MOHURD_033	China	CHN	UMC	Puyang	CHN.12.10.3_1	3	1	83% similarity score between GHS and MoHURD populations	0.65517	2019
MOHURD_034	China	CHN	UMC	Jiyuan	CHN.12.4.1_1	3	2	67% similarity score between GHS and MoHURD populations	0.514029	2019
MOHURD_035	China	CHN	UMC	Kaiping	CHN.6.7.4_1	3	2	68% similarity score between GHS and MoHURD populations	0.407701	2019
MOHURD_036	China	CHN	UMC	Heshan	CHN.6.7.2_1	3	1	84% similarity score between GHS and MoHURD populations	0.432409	2019
MOHURD_037	China	CHN	UMC	Sihui	CHN.6.19.6_1	3	2	68% similarity score between GHS and MoHURD populations	0.46948	2019
MOHURD_038	China	CHN	UMC	Shanwei	CHN.6.13.4_1	3	2	61% similarity score between GHS and MoHURD populations	0.496026	2019
MOHURD_039	China	CHN	UMC	Qingyuan	CHN.6.11.5_1	3	2	72% similarity score between GHS and MoHURD populations	0.59196	2019
MOHURD_040	China	CHN	UMC	Guan	CHN.26.16.3_1	3	1	83% similarity score between GHS and MoHURD populations	0.380888	2019
MOHURD_041	China	CHN	UMC	Guanghan	CHN.26.4.2_1	3	2	65% similarity score between GHS and MoHURD populations	0.545552	2019
MOHURD_042	China	CHN	UMC	Shifang	CHN.26.4.4_1	3	2	69% similarity score between GHS and MoHURD populations	0.502483	2019
MOHURD_043	China	CHN	UMC	Zhongshan	CHN.8.4.4_1	3	2	77% similarity score between GHS and MoHURD populations	0.460366	2019
MOHURD_044	China	CHN	UMC	Huayin	CHN.22.6.8_1	3	2	70% similarity score between GHS and MoHURD populations	0.392572	2019
MOHURD_045	China	CHN	UMC	Wuzhong	CHN.20.3.3_1	3	1	85% similarity score between GHS and MoHURD populations	0.39236	2019
MOHURD_046	China	CHN	UMC	Kashgar	CHN.28.9.3_1	3	2	76% similarity score between GHS and MoHURD populations	0.44406	2019
MOHURD_047	China	CHN	UMC	Shihezi	CHN.28.12.1_1	3	2	72% similarity score between GHS and MoHURD populations	0.45192	2019

## Sheet: 02_Boundary_match=4_removed
								Short_name:	Waste_gen_rate	Waste_gen_rate_yr	Col_cov	Col_cov_yr	Plastic_MSW	Plastic_MSW_yr	Plastic_rigid	Plastic_rigid_yr	Other_recv	Other_Recv_yr	Form_dry_recy	Form_dry_recy_yr	Incin	Incin_yr	Cont_disp	Cont_disp_yr	Cont_fac	Cont_fac_yr
								ID:	tP1pc		tC1		C0		C0a		tC2ii		tC2i		tC2iii		tC3
								Unit:	kg·cap-1·d-1	Year	% MSW generation	Year	% MSW generated	Year	% plastic in MSW	Year	% collected MSW	Year	% collected MSW	Year	% collected MSW	Year	% collected MSW for disposal	Year	% MSW generated	Year
Data_ID	Country	ISO3	Income_level	Municipality	UniqueID for matching admin boundary	GADM level of best match	GADM boundary match score	GADM boundary match notes	Waste generation rate	Waste generation rate year	Collection coverage	Collection coverage year	Plastic in MSW	Plastic in MSW year	Rigid plastic	Rigid Plastic Year	Other recovery	Other recovery year	Formal dry recycling	Formal dry recycling year	Incineration	Incineration year	Controlled disposal	Controlled disposal year	MSW collected and managed in controlled facilities	MSW collected and managed in controlled facilities year
WACT_01	Kenya	KEN	LMC	Nairobi	KEN.30_1	1	1	Population and boundary match well	0.7	2019	65.25	2019	9.6	2019	60.1042	2019					0	2019	0	2019	14.66	2019
WACT_02	Seychelles	SYC	HIC	Victoria	SYC	0	2	Population is for entire Seychelles not just Victoria. Assigned to entire Syechelles as unclear at what level WaCT applied.	2.34	2019	97.77	2019	11.9	2019	45.4622	2019					0	2019	100	2019	97.77	2019
WACT_03	Kenya	KEN	LMC	Kiambu	KEN.13_1	1	2	Population suggests WaCT applied for Kiambu County, therefore level 1 although this poorly matches the city limits.	0.53	2020	51.68	2020	6.77	2020	39.4387	2020					0	2020	0	2020	3	2020
WACT_04	Kenya	KEN	LMC	Mombasa	KEN.28_1	1	1	Population and boundary match well	0.59	2020	56.4	2020	8.47	2020	48.4061	2020					0	2020	0	2020	5.15	2020
WACT_05	Bangladesh	BGD	LMC	Khulna	BGD.4.5.6_1	3	3	Data population much less than GIS population, likely due to Khulna being divided into several parts within GADM. Level 2 has much larger population in GIS than dataset. Assumed data applies to central area of Khulna even though populations differ.	0.6	2021	62.89	2021	4.98	2021	29.7189	2021					0	2021	0	2021	0.26	2021
WACT_06	Cambodia	KHM	LMC	Kep	KHM.10.1_1	2	1	Level 2 (province) believed to be best match even though data population is less than GIS.	1.2	2021	58.15	2021	18.9	2021	48.2011	2021					0	2021	0	2021	0.05	2021
WACT_07	Cambodia	KHM	LMC	Sihanoukville	KHM.13_1	1	2	Population best matches level 1 although this is a poor match to the city boundaries.	1.75	2021	89.59	2021	22.65	2021	35.894	2021					0	2021	0	2021	0	2021
WACT_08	Democratic Republic of the Congo	COD	LIC	Bukavu	COD.22.2_1	2	1	Dataset population slightly higher than admin boundary but has the best match to the city boundaries.	0.69	2021	7.02	2021	6.37	2021	37.8336	2021					0	2021	0	2021	0.1	2021
WACT_09	Dominican Republic	DOM	UMC	Santo Domingo (East + Boco Chica)	DOM.31.5_1 + DOM.31.1_1	2	2	GIS population is slightly lower than that reported in dataset, likel due to urban agglomerates also being included.	1.04	2021	82.78	2021	12.85	2021	45.8366	2021					0	2021	6.66773	2021	5.63	2021
WACT_10	Ethiopia	ETH	LIC	Addis Ababa	ETH.1_1	1 or 2	2	Population in dataset slightly higher than GIS but GADM boundary clearly matches that of the city.	0.44	2021	98.19	2021	8.19	2021	49.2063	2021					20.7983	2021	0	2021	23.14	2021
WACT_11	Ethiopia	ETH	LIC	Bahir Dar	ETH.3.3_1	2 or 3	2	Both level 2 and 3 are same. The population matches well but the GADM boundary covers only part of the city boundaries	0.56	2021	85.53	2021	11.69	2021	55.6031	2021					0	2021	0	2021	0.37	2021
WACT_12	India	IND	LMC	Mangalore	IND.16.12.3_1	3	2	GIS population is higher than dataset as GADM boundary covers a larger area than the city boundary, but level 3 is the most granular and provides best fit.	0.67	2021	89.83	2021	9.24	2021	26.9481	2021					0	2021	0	2021	12.87	2021
WACT_14	Nigeria	NGA	LMC	Lagos	NGA.25_1	1	2	Dataset population is less than GIS population. Lv 1 GADM boundary extends along the coast outside city limits based on Google Maps. Level 2 is a worse fit as breaks city down into several districts.	0.79	2021	47.98	2021	31.83	2021	32.6422	2021					0	2021	0	2021	7.82	2021
WACT_15	Pakistan	PAK	LMC	Karachi	PAK.8.2_1	2	2	Population of dataset is higher than GIS population, but reasonably close and seems to be the best level of match	0.49	2021	81.17	2021	13.08	2021	22.7064	2021					0	2021	0	2021	0.06	2021
WACT_16	Tanzania	TZA	LMC	Dar es Salaan	TZA.2_1	1	1	Populaiton matches well. GADM boundary slightly larger than city	0.84	2021	35.61	2021	4.71	2021	57.5372	2021					0	2021	0	2021	0.97	2021
WACT_17	Tunisia	TUN	LMC	Sousse	TUN.20_1	1	3	No single boundary matches well as city is divided into several GADM polygons. Likely a combination of several of these, Level 1 probably best match	1.18	2021	90.2	2021	15.28	2021	49.8691	2021					0	2021	100	2021	90.2	2021
WACT_18	Zimbabwe	ZWE	LMC	Harare	ZWE.2.1_1	1 or 2	2	GIS population larger than dataset populaiton but GADM boundary matches city limits well. Both level 1 and 2 are the same for Harare.	0.56	2021	25.39	2021	15.11	2021	48.3786	2021					0	2021	0	2021	1.77	2021
WACT_19	Malaysia	MYS	UMC	Seremban	MYS.7.6_1	2	1	Population matches well as do adminsitrative boudnaries	0.88	2021	96.25	2021	15.83	2021	42.1352	2021					0	2021	100	2021	96.25	2021
WACT_20	Thailand	THA	UMC	Chonburi	THA.12_1	1	2	Level 1 best matches population, but GADM boundary also encompasses other cities (e.g. Pattaya City)	1.23	2021	98.18	2021	15.07	2021	49.3696	2021					0	2021	22.7854	2021	36.98	2021
WACT_21	Vietnam	VNM	LMC	Tam Ky	VNM.47.15_1	2	1	Good match to population and city limits	0.92	2021	93.86	2021	20.51	2021	45.2462	2021					0	2021	0	2021	0	2021
WACT_22	Vietnam	VNM	LMC	Hoi-An	VNM.47.6_1	2	1	Good match to population and city limits	0.64	2021	99.23	2021	16.75	2021	31.3433	2021					0	2021	100	2021	97.64	2021
WACT_23	Vietnam	VNM	LMC	Anonymous	VNM.54.2_1	2	2	Dataset population slightly higher but GADM boundary matches city limits well.	0.83	2021	97.33	2021	13.67	2021	41.4777	2021					0	2021	100	2021	76.56	2021
WACT_24	Indonesia	IDN	LMC	Anonymous	IDN.9.10_1	2	2	Dataset population less than GIS but GADM boundary matches city limits well.	0.48	2021	94.37	2021	17.72	2021	27.5395	2021					0	2021	0	2021	2.49	2021
WACT_25	Indonesia	IDN	LMC	Anonymous	IDN.9.16_1	2	1	Population and boundary match well	0.51	2021	88.04	2021	19.14	2021	31.7137	2021					0	2021	0	2021	0.82	2021
WACT_26	Ghana	GHA	LMC	Cape Coast	GHA.3.8_1	2	1	Good match to population and city limits	0.73	2021	62.59	2021	20.26	2021	20.3356	2021					0	2021	0	2021	0	2021
WACT_27	Egypt	EGY	LMC	Alexandria	EGY.6_1	1	2	Dataset population slightly more than GIS but is for more recent year (2022 vs 2020) so could have increased a bit.	0.93	2022	83.76	2022	15.98	2022	27.1589	2022					0	2022	100	2022	80.8	2022
WACT_28	Egypt	EGY	LMC	Anonymous	EGY.1_1	1	1	Population matches well. Applies to a governate (provincial) region	0.7	2022	59.93	2022	10.96	2022	36.3139	2022					0	2022	55.7325	2022	48.07	2022
WACT_29	India	IND	LMC	Thiruvananthapuram	IND.17.12.4_1	3	1	Population matches well as do city boudnaries	0.44	2021	68.02	2021	10.73	2021	54.4268	2021					0	2021	0	2021	49.47	2021
WACT_30	Kenya	KEN	LMC	Taita Taveta	KEN.39_1	1	1	Population matches well as do adminsitrative boudnaries	0.54	2022	30.06	2022	4.77	2022	61.6352	2022					0	2022	0	2022	1.32	2022
WACT_31	Philippines	PHL	LMC	Cagayan de Oro	PHL.49.5_1	2	1	Population matches well as do city boudnaries	0.38	2021	92.3	2021	15.52	2021	34.0851	2021					0	2021	100	2021	91.33	2021
WACT_32	Philippines	PHL	LMC	Legazpi	PHL.5.7_1	2	1	Population matches well, admin boundaries include more rural areas.	0.37	2021	61.7	2021	11.77	2021	49.6177	2021					0	2021	100	2021	56.46	2021
WACT_33	Philippines	PHL	LMC	Ormoc	PHL.43.30_1	2	1	Population matches well, admin boundaries include more rural areas.	0.31	2021	58.36	2021	19.19	2021	63.1579	2021					0	2021	0	2021	12.5	2021
WACT_34	Senegal	SEN	LMC	Dakar	SEN.1.1_1	2	2	GIS population slightly higher. Some uncertainty on how far along the peninsular the city spreads but Level 2 best matches the population so chosen.	0.97	2022	95.22	2022	9.13	2022	39.6495	2022					0	2022	0	2022	1.33	2022
WACT_35	Thailand	THA	UMC	Anonymous	THA.64.3_1	2	3	GIS population much bigger but matches pcity boundaries well	1.05	2021	97.97	2021	17.23	2021	41.0911	2021					93.3844	2021	0	2021	93.04	2021
WACT_36	Thailand	THA	UMC	Anonymous	THA.67.12_1	2	2	GIS Population less than dataset.. Unlikely to be level 1 as extends to mainland. Instead taken as level 2 to represent entire island of Koh Samui.	1.41	2021	94.46	2021	17.43	2021	44.9225	2021					0	2021	0	2021	25.84	2021
WACT_37	Thailand	THA	UMC	Anonymous	THA.64.7_1	2	3	GIS population much bigger but matches city boundaries well. Level 2 better match than level 3 for population	1.28	2021	95.24	2021	16.51	2021	38.0981	2021					0	2021	0	2021	10.6	2021
WACT_38	Thailand	THA	UMC	Anonymous	THA.67.13_1	2	1	Population matches well as do city boudnaries	1.22	2021	97.82	2021	24.5	2021	49.3469	2021					0	2021	0	2021	12.29	2021
WACT_39	Uganda	UGA	LIC	Anonymous	UGA.16.1_1 + UGA.57.3_1 + UGA.44.3_1 + UGA.57.1_1 + UGA.57.2_1	2	2	This is believed to be represented by five level 2 GADM boundaries. The population via GIS is slightly higher than that recorded in the dataset.	0.97	2021	34.82	2021	8.07	2021	31.1029	2021					0	2021	0	2021	1.96	2021
WABI_001	Australia	AUS	HIC	Adelaide	AUS.8.1_1+AUS.8.67_1+AUS.8.62_1+AUS.8.8_1+AUS.8.41_1+AUS.8.65_1+AUS.8.50_1+AUS.8.11_1+AUS.8.9_1+AUS.8.58_1+AUS.8.54_1+AUS.8.46_1+AUS.8.22_1+AUS.34_1+AUS.8.32_1+AUS.8.45_1	2	2	GIS population smaller than data. This is because the data is believed to represent the wider metropolitan area of Adelaide so joined several polygons	1.144	2007	100	2007	5	2007			12.15	2007	41.85	2007	0	2007	100	2007
WABI_002	Greece	GRC	HIC	Athens (GAA)	GRC.3.1_1	1 or 2	1	Added to level 2 as seems best match for population. Level 1 also the same.	1.6	2008	100	2008	13	2008			0.04	2008	9.96	2008	0	2008	100	2008
WABI_003	Bahrain	BHR	HIC	Bahrain	BHR	0	1	Good match with 2010 population	1.1	2009	100	2009	13.4	2009			0	2009	5	2009	0	2009	100	2009
WABI_004	Mali	MLI	LIC	Bamako	MLI.1.1.1_1	1 or 2 or 3	1	Good match with 2010 population	0.700001	2007	57	2007	2	2007			0	2007	0	2007	0	2007	0	2007
WABI_005	India	IND	LMC	Bangalore	IND.16.3.2_1	3	1	Added to Bangalore North LV3 as covers the majority of the city.	0.547945	2007	75	2007	11	2007			14	2007	0	2007	0	2007	73	2007
WABI_006	United Kingdom	GBR	HIC	Belfast	GBR.2.3.1_1	2 or 3	1	Reasonable match on population and matches boudnaries well	1.87088	2013	100	2013	6	2013			14.315	2013	20.685	2013	0	2013	98	2013
WABI_007	Brazil	BRA	UMC	Belo Horizonte	BRA.13.65_1	2	1	2.5mill pop on GIS seems plausible	1.08775	2007	82	2007	11	2007			0	2007	0.609756	2007	0	2007	100	2007
WABI_008	Kyrgyzstan	KGZ	LIC	Bishkek	KGZ.2.1_1	1 or 2	2	Population slightly higher than GIS population	0.542073	2010	83	2010	8	2010			0.1875	2010	3.38855	2010	0	2010	0	2010
WABI_009	Peru	PER	UMC	Canete	PER.16.3.14_1	3	1	Reasonable match on population	0.663024	2007	78	2007	9	2007			0	2007	1.28205	2007	0	2007	0	2007
WABI_010	Saint Lucia	LCA	UMC	Castries	LCA.3_1	1	1	Good match with 2010 population	0.596553	2007	100	2007	26	2007			0	2007	2.5	2007	0	2007	100	2007
WABI_011	Mauritius	MUS	UMC	Curepipe	MUS.7_1	1	3	360k pop bigger due to level 1 being the smallest level but does contain the area	0.777264	2009	100	2009	16	2009			0	2009	0	2009	0	2009	100	2009
WABI_012	Tanzania	TZA	LIC	Dar-es-Salaam	TZA.2_1	1	1	5.6mil pop in 2015 seems plausible	0.951406	2013	40	2013	16	2013			0	2013	0	2013	0	2013	0	2013
WABI_013	India	IND	LMC	Delhi	IND.25.1.1_1	1 or 2 or 3	1	16mil 2010 pop seems plausible	0.500072	2007	75	2007	1	2007			6	2007	0	2007	0	2007	10	2007
WABI_014	Bangladesh	BGD	LIC	Dhaka	BGD.3.1_1	2	2	Waste management is split differently for urban and rural areas. The GIS layer does not account for this difference. A regional level is chosen to represent Dhaka (level 2) even though this is bigger than Dhaka it is deemed the best fit.	0.543282	2007	55	2007	4	2007			1	2007	0	2007	0	2007	55	2007
WABI_015	Nepal	NPL	LIC	Ghorahi	NPL.4.3.1.39_1	4	2	Admin Boundary actually called TribhuwanNagarN.P. This data has higher population than in GIS measurement but believed to be same place.Wikipedia says Ghorahi has won award for cleanest landfill.	0.32491	2007	83	2007	5	2007			0	2007	2.40964	2007	0	2007	88	2007
WABI_016	Mexico	MEX	UMC	Guadalajara	MEX.14.43_1	2	2	GIS has double the population of this, but boundary matches well	1.17461	2010	95	2010	10	2010			0	2010	0	2010	0	2010	100	2010
WABI_017	Indonesia	IDN	LMC	Jakarta	IDN.7_1	1	1	Reasonable match on population in 2010	0.691981	2010	95	2010	14.27	2010			5	2010	0	2010	0	2010	84	2010
WABI_018	Uganda	UGA	LIC	Kampala	UGA.16.1_1+UGA.57.3_1+UGA.57.1_1+UGA.44.3_1	2	2	Data for Greater Kampala. Has bigger population than GIS suggest but boundary matches well	0.5	2010	50	2010	7.8	2010			0	2010	0	2010	0	2010	55	2010
WABI_019	China	CHN	LMC	Kunming	CHN.30.7.6_1	3	1	4mill pop in 2010 on GIS reasonable change	0.73392	2007	100	2007	7	2007			0	2007	0	2007	0	2007	100	2007
WABI_020	Pakistan	PAK	LMC	Lahore	PAK.7.5.2_1	3	1	Population matches well as does boundary	0.649752	2011	77	2011	12.25	2011			8	2011	0	2011	0	2011	18	2011
WABI_021	Zambia	ZMB	LIC	Lusaka	ZMB.5.4_1	2	2	1.1m Pop in 2010 so data pop is higher. Good match with boundary	0.376062	2007	63	2007	7	2007			0	2007	6.34921	2007	0	2007	45	2007
WABI_022	Nicaragua	NIC	LMC	Managua	NIC.13.2_1	2	1	Populaiton matches well	1.32632	2007	68	2007	8	2007			0	2007	0.735294	2007	0	2007	100	2007
WABI_023	Mozambique	MOZ	LIC	Maputo	MOZ.5.2_1	2	2	GIS has slightly higher population than referenced here. Could be Level 3 instead which has a lower population than reported here. Think Level 2 is best match as described as "District" level and GIS layer covers most of city	0.866133	2009	82	2009	8	2009			0	2009	0	2009	0	2009	0	2009
WABI_024	Liberia	LBR	LIC	Monrovia	LBR.11.2.1_1	2 or 3	1	Both level 2 and 3 have same GIS data but think based on oher cities, Level 3 is the best match.	0.617055	2013	37	2013	13	2013			0	2013	0	2013	0	2013	70	2013
WABI_025	Tanzania	TZA	LIC	Moshi	TZA.9.3_1	2	1	Good match on population and boundary	0.779477	2007	60	2007	9	2007			0	2007	0	2007	0	2007	87	2007
WABI_026	Kenya	KEN	LIC	Nairobi	KEN.30_1	1	1	Good match on population and boundary	0.958904	2007	52	2007	16.1	2007			0	2007	0	2007	0	2007	0	2007
WABI_027	Egypt	EGY	LMC	Qena	EGY.25.10_1	2	2	Better match with Level 2 and looking at GIS layer for comparison confirms but population reported here is lower than GIS. There is also a Qena city but that has a GIS population of zero so perhaps why. Added to Qena on LV2 instead.	0.49576	2009	100	2009	12.5	2009			0	2009	0	2009	0	2009	0	2009
WABI_028	Philippines	PHL	LMC	Quezon City	PHL.47.14_1	2	1	Good match on population and boundary	0.704859	2007	99	2007	16	2007			8	2007	0	2007	0	2007	98	2007
WABI_029	Netherlands	NLD	HIC	Rotterdam	NLD.14.67_1	2	1	600k pop seems plausible	1.50971	2007	100	2007	6.8	2007			9.729	2007	13.271	2007	76.23	2007	100	2007
WABI_030	United States	USA	HIC	San Francisco	USA.5.38_1	2	1	804k pop on GIS seems reasonable	1.66714	2007	100	2007	11	2007			13.344	2007	34.656	2007	0	2007	100	2007
WABI_031	Singapore	SGP	HIC	Singapore	SGP	0	1	Good match on population and boundary	1.32132	2013	100	2013	11	2013			0.93	2013	4.07	2013	38	2013	100	2013
WABI_032	Bulgaria	BGR	UMC	Sofia	BGR.5.1_1	1 or 2	1	Good match on population and boundary	1.01159	2011	100	2011	15.6	2011			0	2011	0	2011	0	2011	100	2011
WABI_033	Tunisia	TUN	LMC	Sousse	TUN.20.15_1+TUN.20.4_1+TUN.20.17_1+TUN.20.14_1+TUN.20.16_1	2	2	Several level 2 polygons represented this data point best	0.622539	2007	100	2007	9	2007			0	2007	0	2007	0	2007	100	2007
WABI_034	India	IND	LMC	Surat	IND.11.28.2_1	3	2	Added to level 3 (Chorasi). Although this has a much lower GIS popualtion than that shown in the data here, this is believed to be due to an error in where the GIS popualtion is allcoated spatially. Chorosi in fact better matches city boundaries.	0.330554	2010	93	2010	10	2010			16	2010	0	2010	0	2010	75	2010
WABI_035	United States	USA	HIC	Tompkins County	USA.33.56_1	2	1	Good match on population and boundary	2.72632	2007	100	2007	11	2007			0	2007	37	2007	0	2007	100	2007
WABI_036	Bulgaria	BGR	UMC	Varna	BGR.24.11_1	2	1	Good match on population and boundary	1.13947	2007	100	2007	15	2007			0	2007	2	2007	0	2007	99	2007
WABI_037	Spain	ESP	HIC	Vitoria-Gasteiz	ESP.16.1.3.12 1	4	2	Lv3 and 4 both good matches. Decided Lv3 as more likely level at which waste is managed	1.06142	2012	100	2012	0.161	2012			0	2012	38	2012	0	2012	100	2012
WABI_038	India	IND	LMC	Warangal	IND.32.10.1_1	3	1	Added to Hanmakonda (LV3) which represent the Taluka which roughly covers the Greater Warangal Muncipal Corporation.	0.366583	2012	95	2012	12	2012			31	2012	0	2012	0	2012	12	2012
WABI_039	Egypt	EGY	LMC	Abo Badawy Village	EGY.23.4_1	2	3	same issue.. Small village large boundries, also name a bit different, Ezbet Abou Badawi 306k pop	0.567394	2012	100	2012	3	2012			0	2012	0	2012	0	2012	0	2012
WABI_040	Egypt	EGY	LMC	Assiut City	EGY.18.7_1	2	1	GIS population shows reasonable increase woith time	0.248825	2012	100	2012	10.03	2012			0	2012	0	2012	0	2012	0	2012
WABI_041	Ethiopia	ETH	LIC	Aweday City	ETH.8.14.10_1	3	2	in the Haro maya region, GIS pop much bigger, gis boundry is much larger than the town and contains other urban areas. No level 4 to further disaggregate	0.849938	2013	29	2013	3.3	2013			0	2013	0	2013	0	2013	0	2013
WABI_042	Ethiopia	ETH	LIC	Bale Robe	ETH.8.2.17_1	3	2	200k pop same isssue as above, small town big level 3 area covers the correct place	0.331348	2013	30	2013	4	2013			0	2013	0	2013	0	2013	0	2013
WABI_043	Egypt	EGY	LMC	Banha City	EGY.12.5_1	2	2	GIS pop bigger as boudnary covers much more than just the city and no more granular levels. V densly populated even on the outskirts of the city so probably has caused this higher pop	0.671613	2012	100	2012	13.5	2012			0	2012	0	2012	0	2012	0	2012
WABI_044	Egypt	EGY	LMC	Beila City	EGY.23.4_1	2	2	Think this is Biyala, in Kafr el sheikh(L1), is hard to find info on internet but one website says Beila is in Kafr el sh.. and one had the weather for 'bella' in this position. GIS has pop as 306k the area is a lot wider than the town itself	0.796665	2012	100	2012	5	2012			0	2012	0	2012	0	2012	0	2012
WABI_045	China	CHN	UMC	Bengbu	CHN.1.2.1_1	3	2	840k pop on GIS bit low but I think this is due to the boundry being quirte small with densly populated areas lying outside the boundry may explain the increase	0.723986	2018	100	2018	22	2018							73	2018	100	2018
WABI_046	Ethiopia	ETH	LIC	Bishoftu	ETH.8.15.1_1	3	2	in the adas region, small towns surround it in the L3. 339k GIS pop, probably larger due to the boundry size	0.349996	2013	80	2013	7.8	2013			0	2013	0	2013	0	2013	0	2013
WABI_048	Ethiopia	ETH	LIC	Burie	ETH.3.6.2_1	3	2	sometimes called bure or burie-zuria, 186k pop on GIS fairly close given timeframe, also this covers wider area than just the town	0.249066	2013	10	2013	13	2013			0	2013	0	2013	0	2013	0	2013
WABI_049	Ethiopia	ETH	LIC	Dilla	ETH.10.11.2_1	3	3	Not sure how long ago this pop was taken. City s cut in half by 3 boundries, this one covers the most part of the urban area. GIS has pop as 199k	0.25008	2013	30	2013	6	2013			0	2013	0	2013	0	2013	0	2013
WABI_050	Ethiopia	ETH	LIC	Dire Dawa	ETH.5.1.1_1	3	2	424k pop on GIS not sure why it is this much higher as surrounding area has low density pop but might be to do with time of data pop and slightly extendend boundry. Seems to be in the right place ref google	0.5	2013	60	2013	9	2013			0	2013	0	2013	0	2013	65	2013
WABI_051	Egypt	EGY	LMC	El Fateh City	EGY.18.4_1	2	3	Again I think this is on a smaller level than GIS has. Think this is the right place but is hard to be sure because of different spellings on maps and on google and in data. Pop also v different (327k pop) but this is likely due to the larger area level	0.83599	2012	100	2012	10.03	2012			0	2012	0	2012	0	2012	0	2012
WABI_052	Egypt	EGY	LMC	El Zarabi Village	EGY.18.2_1	2	2	found in the Abu Tij region, AZ zarabi on map. 349k pop on GIS this village is veery small in comparison to the region but no smaller levels exist.	0.434042	2012	100	2012	10.03	2012			0	2012	0	2012	0	2012	40	2012
WABI_053	Egypt	EGY	LMC	Fayoum City	EGY.4.1_1	2	3	960k pop on GIS al Fayyum is the placethat comes up in google but there are multiple spellings so tricky to say for sure3	0.686103	2012	100	2012	6	2012			0	2012	0	2012	0	2012	0	2012
WABI_054	Ethiopia	ETH	LIC	Jijiga	ETH.9.3.5_1	3	2	392k pop on GIS 2020, may be plausible given timeframe and some smaller towns surrounding	0.569781	2013	52	2013	20	2013			0	2013	0	2013	0	2013	0	2013
WABI_055	Ethiopia	ETH	LIC	Jimma	ETH.8.8.6_1	3	2	425k pop on GIS likely due to therr extended area of the L3s some dense pops surounding jimma, matches google	0.248487	2013	40	2013	7	2013			0	2013	0	2013	0	2013	0	2013
WABI_056	Egypt	EGY	LMC	Kafr El Sheikh City	EGY.23.7_1	2	2	656k pop, covers the city and extra densly populated space that surrounds	0.997391	2012	100	2012	5	2012			0	2012	0	2012	0	2012	0	2012
WABI_057	China	CHN	UMC	Lanzhou	CHN.5.7_1	2	2	4.2 mill pop on GIS big change but is likely due to the wider boundry around the city	1.04934	2018	100	2018	12	2018							100	2018	100	2018
WABI_058	South Africa	ZAF	UMC	Mangaung	ZAF.2.3.1_1	3	1	853k pop reasonable increase	0.806436	2015	90	2015	11.5	2015			0	2015	0	2015	0	2015	92	2015
WABI_059	South Africa	ZAF	UMC	Mbombela	ZAF.6.1.2_1	3	1	715k pop on GIS plausible increase correct location	0.6	2015	30	2015	16	2015			0	2015	0	2015	0	2015	60	2015
WABI_060	South Africa	ZAF	UMC	Msunduzi	ZAF.4.6.5_1	3	1	681k pop on GIS plausible increase correct location	0.444781	2015	77	2015	10	2015			0	2015	0	2015	0	2015	76	2015
WABI_061	Egypt	EGY	LMC	Sanmannoud City	EGY.5.8_1	2	2	spelt Samannnud on GIS, pop 384k, whixh is much higher but seems to be the rigfht place matching google and covers the entire city and more which may explain the increase, no L3s.	0.856936	2012	100	2012	6	2012			0	2012	0	2012	0	2012	0	2012
WABI_062	Egypt	EGY	LMC	Senuris city	EGY.4.5_1	2	2	601k pop on GIS called sinnerus but seen online that Senuris is in the level one area it is here. Covers sinnerus but also some surrounding areas so may be the reason for the high pop	0.691473	2012	100	2012	5	2012			0	2012	0	2012	0	2012	10	2012
WABI_063	Egypt	EGY	LMC	Shebin El Qanater City	EGY.12.9_1	2	2	544k pop, level very big so likely to include other urban areas	0.686779	2012	100	2012	13.5	2012			0	2012	0	2012	0	2012	0	2012
WABI_064	Egypt	EGY	LMC	Suez City	EGY.15_1	1	1	670k pop plausible increase	0.607345	2012	100	2012	0	2012			0	2012	0	2012	0	2012	0	2012
WABI_065	China	CHN	UMC	Suzhou	CHN.15.7_1	2	1	5.3mill pop on GIS reasonable increae in timeframe	1.53624	2018	100	2018	20	2018							73	2018	100	2018
WABI_066	China	CHN	UMC	Taian	CHN.23.12.4_1	3	2	1.8mil pop on GIS perhaps due to dense outskirt areas	1.12701	2018	100	2018	16	2018							64	2018	100	2018
WABI_067	Egypt	EGY	LMC	Tanta city	EGY.5.9_1	2	2	729k npop onm GIS bit of a large increase but may be plausible given the extended time frmae. Seems to be in the correct place	0.939148	2012	100	2012	6	2012			0	2012	0	2012	0	2012	50	2012
WABI_068	Ethiopia	ETH	LIC	Woldia	ETH.3.11.5_1	3	2	243k pop on GIS, other data suggests 86k pop and location mathches with google so think is the right place. Boundry quite large and includes aanother urban area which may explain change in pop	0.25079	2013	10	2013	27	2013			0	2013	0	2013	0	2013	0	2013
WABI_069	Ethiopia	ETH	LIC	Woliso	ETH.8.4.12_1	3	2	260k pop, l3 boundry contains other urban areas which likelyt explain the pop change. Matches google for location	0.250228	2013	30	2013	5	2013			0	2013	0	2013	0	2013	0	2013
WABI_070	Ethiopia	ETH	LIC	Wolkite	ETH.10.12.8_1	3	2	118k pop on GIS, other populated areas surrounding the town may explain increase. Matches google location	0.249066	2013	40	2013	7	2013			0	2013	0	2013	0	2013	0	2013
WABI_071	Ethiopia	ETH	LIC	Wuqro	ETH.11.4.6_1	3	2	179k pop, other populated areas surrounding the town may explain increase. Matches google location	0.249619	2013	50	2013	5	2013			0	2013	0	2013	0	2013	0	2013
WABI_072	China	CHN	UMC	Xian	CHN.22.7.6_1	3	1	5.2mill pop seems reasonable difference, area covers the city centre	1.70789	2018	100	2018	13	2018							94	2018	100	2018
WaW_001	Afghanistan	AFG	LIC	Jalalabad	AFG.22.9_1	2	1		0.520246	2017	95	2017	5.64561	2017			0	2017	0	2017	0	2017	0	2017
WaW_002	Afghanistan	AFG	LIC	Kandahar	AFG.15.5_1	2	1		0.813219	2017	95	2017	9.64252	2017			0	2017	0	2017	0	2017	0	2017
WaW_003	Afghanistan	AFG	LIC	Mazar-E-Sharif	AFG.4.11_1	2	2	Population differs with GIS population but believed to be same place	0.237743	2017	95	2017	10.6613	2017			0	2017	0	2017	0	2017	0	2017
WaW_004	Afghanistan	AFG	LIC	Kabul	AFG.14.6_1	2	2	Population differs with GIS population but believed to be same place	1.47297	2016	75	2016	11.1111	2016			0	2016	0	2016	0	2016	0	2016
WaW_005	Afghanistan	AFG	LIC	Herat	AFG.12.7_1	2	2	Population greatly differs with GIS population but believed to be same place	0.784262	2017	95	2017	12.0612	2017			0	2017	0	2017	0	2017	0	2017
WaW_006	Albania	ALB	UMC	Vlora	ALB.12.3.13_1	3	1		1.53858	2014	85	2014	11.1	2014			0	2014	0	2014	0	2014	0	2014
WaW_007	Albania	ALB	UMC	Korca	ALB.7.3.4_1	3	1		1.12477	2017	100	2017	11	2017			0	2017	0	2017	0	2017	100	2017
WaW_008	Algeria	DZA	UMC	Algiers	DZA.4_1	1	2	Population is a bit smaller than GIS population. Added to level 1 as best fit	1.30742	2016	100	2016	16.88	2016			1.11111	2016					91.3366	2016
WaW_009	Algeria	DZA	UMC	Mostaganem	DZA.30.17_1	2	2	Population is a much larger than GIS population but area shows a good match	0.608828	2006			10.5	2006
WaW_010	American Samoa	ASM	UMC	Pago Pago	ASM.1_1	1	3	No population in data to check matching of city. Lv1 chosen as other areas are believed to be likely too small an area to manage waste independently.					12.8
WaW_011	Angola	AGO	LMC	Luanda	AGO.11_1	1	1	Data added to level 1 as better match than level 2 to city boundaries.	0.8	2009			12	2009
WaW_012	Argentina	ARG	UMC	Cordoba	ARG.6.2_1	2	1		1.07708	2010	93.5	2010	14	2010			0	2010	0.68	2010	0	2010	69.7946	2010
WaW_013	Argentina	ARG	UMC	Ciudada Autonomous De Buenos Aires	ARG.5.1_1	1 or 2	1		2.37152	2010	98.1	2010	16	2010									64.5815	2010
WaW_014	Argentina	ARG	UMC	Rosario	ARG.21.12_1	2	1		1.53511	2010	65.6	2010	11.5358	2010			14.5608	2010	0	2010	0	2010	100	2010
WaW_017	Australia	AUS	HIC	Perth	AUS.11.101_1	2	1						8.17547						18
WaW_018	Australia	AUS	HIC	Melbourne	AUS.10.44_1+AUS.10.31_1+AUS10.42_1+AUS.10.50_1+AUS.10.52_1+AUS.10.18_1+AUS.10.78_1+AUS.10.9_1+AUS.10.64_1+AUS.10.59_1+AUS.10.7_1+AUS.10.22_1+AUS.10.9_1+AUS.10.4_1+AUS.10.18_1+AUS.10.52_1+AUS.10.50_1+AUS.10.42_1+AUS.10.31_1+AUS.10.10_1+AUS.10.35_1+AUS.10.49_1+AUS.10.74_1+AUS.10.40_1+AUS.10.43_1+AUS.10.26_1+AUS.10.20_1+AUS.10.14_1	2	2	Population is of the wider urban agglomeration (from cities codebook). Level 2 splits Melbourne into several district. These are assumed to all represent the data point					15.3285				0		25.81		0		100
WaW_019	Australia	AUS	HIC	Canberra	AUS.2.1_1	2	1	Also called Unincorporated Australiam Capital Territory	2.71163	2010			4	2010			0	2010	70	2010	0	2010	93.3333	2010
WaW_020	Austria	AUT	HIC	Vienna	AUT.9_1	1	1		1.63145	2013	100	2013	2.9	2013
WaW_021	Azerbaijan	AZE	UMC	Baku	AZE.1.2_1	2	1		2.26878	2013	50.77	2013	10.3896	2013			0	2013	0	2013	39.9703	2013	100	2013
WaW_023	Bangladesh	BGD	LMC	Patuakhali	BGD.1.5.7_1	3	2	Data added to level 3 although GIS population bigger and covers larger area. Upazila deemed best fit for waste data	0.366702	2012	60	2012	2.88971	2012			0	2012	0	2012	0	2012	0	2012
WaW_024	Bangladesh	BGD	LMC	Rajshahi	BGD.5.7.3_1	3	2	Data added to level 3 although GIS population smaller as believed to cover correct area and has a closer match with the GIS population than level 2.	0.340274	2012	72	2012	4.05081	2012			0	2012	0	2012	0	2012	0	2012
WaW_025	Bangladesh	BGD	LMC	Rangpur	BGD.6.7.7_1	3	2	Data added to level 3 although GIS population bigger and covers larger area. Upazila deemed best fit for waste data	0.756238	2012	32	2012	4.54909	2012			0	2012	0	2012	0	2012	0	2012
WaW_026	Bangladesh	BGD	LMC	Chittagong	BGD.2.4.4_1+BGD.2.4.2_1+BGD.2.4.19_1+BGD.2.4.18_1+BGD.2.4.17_1+BGD.2.4.14_1+BGD.2.4.13_1+BGD.2.4.11_1+BGD.2.4.9_1+BGD.2.4.8_1+BGD.2.4.7_1	3	2	City split into several level 3's so joined these to represent the City corporation.	0.809519	2012	42	2012	7.21072	2012			1.4194	2012	0	2012	0	2012	0	2012
WaW_027	Bangladesh	BGD	LMC	Dhaka	BGD.3.1.4_1+BGD.3.1.3_1+BGD.3.1.2_1+BGD.3.1.1_1+BGD.3.1.46_1+BGD.3.1.45_1+BGD.3.1.44_1+BGD.3.1.42_1+BGD.3.1.43_1+BGD.3.1.41_1+BGD.3.1.40_1+BGD.3.1.39_1+BGD.3.1.38_1+BGD.3.1.37_1+BGD.3.1.35_1+BGD.3.1.34_1+BGD.3.1.33_1+BGD.3.1.32_1+BGD.3.1.31_1+BGD.3.1.30_1+BGD.3.1.28_1+BGD.3.1.27_1+BGD.3.1.25_1+BGD.3.1.26_1+BGD.3.1.24_1+BGD.3.1.23_1+BGD.3.1.22_1+BGD.3.1.20_1+BGD.3.1.19_1+BGD.3.1.18_1+BGD.3.1.17_1+…	3	2	City split into several level 3's so joined these to represent the City corporation.	0.684782	2005	44	2005	4.1	2005			0	2005	0	2005	0	2005	0	2005
WaW_028	Belarus	BLR	UMC	Grodno	BLR.3.5_1	2	1	Also called Hrodna	1.20056	2016	99	2016	8.6	2016			0	2016	0.6	2016	0	2016	100	2016
WaW_029	Belarus	BLR	UMC	Minsk	BLR.5.11_1	2	1		1.62441	2016	100	2016	10.0958	2016			0	2016	0	2016	0	2016	97	2016
WaW_030	Belgium	BEL	HIC	Liege	BEL.3.3.2_1	3	2	Data population slightly higher than GIS but there is a good match with the city boundary	1.41016	2014	100	2014					17	2014	53	2014	26	2014	100	2014
WaW_031	Belgium	BEL	HIC	Brussels	BEL.1.1.1_1	3	1		1.11417	2013	100	2013	11	2013
WaW_032	Belize	BLZ	UMC	San Pedro	BLZ.3_1	1	2	Level 1 (regional level) is the maximum granularity of admin layers. The data point was assumed representative of the region.	1.95934	2015	57.6	2015	13	2015			0	2015	0	2015	0	2015	100	2015
WaW_033	Belize	BLZ	UMC	Belize City	BLZ.1_1	1	2	Level 1 (regional level) is the maximum granularity of admin layers. The data point was assumed representative of the region.	1.9858	2015	66	2015	21	2015			0	2015	0	2015	0	2015	100	2015
WaW_034	Benin	BEN	LIC	Porto Novo	BEN.10_1	1	2	Data added to level 1 despite the level 1 the area being much bigger than the city, therefore data assumed representative of the larger area. Also called Oueme	0.5	2000	25	2000
WaW_035	Benin	BEN	LIC	Cotonou	BEN.8.1_1	2	1		1.1028	2000	50	2000	4.43	2000
WaW_036	Bhutan	BTN	LMC	Thimphu	BTN.14.1_1	2	2	Thimphu split into a few disitrcts but the district selected (Chang) covers the majortiy of the city	0.516046	2016	95	2016	13.4865	2016			8.88889	2016	0	2016	0	2016	0	2016
WaW_037	Bhutan	BTN	LMC	Phuentsholing	BTN.2.10_1	2	1		0.447368	2014	95	2014	12.0879	2014			0	2014	0	2014	0	2014	100	2014
WaW_038	Bolivia	BOL	LMC	La Paz	BOL.4.17.3_1	3	1	Good match with population and municipal level according to GADM	0.733513	2010	90	2010	15.2	2010			1.11111	2010					100	2010
WaW_039	Bosnia and Herzegovina	BIH	UMC	Banja Luka	BIH.3.1.1_1	3	1		1.22887	2015	81.65	2015	22.2777	2015			0	2015	0	2015	0	2015	100	2015
WaW_040	Bosnia and Herzegovina	BIH	UMC	Sarajevo	BIH.2.6_1	2	2	Sarajevo city is comprised of several level 3 districts. Instead added this data point to level 2 although this is bigger than the city as was closer match to th epopulation recorded	1.3266	2014	95	2014	2.51256	2014
WaW_041	Botswana	BWA	UMC	Gaborone	BWA.4_1	1	2	Data population bigger than GIS but areas seems to match	0.7	2011			4.5	2011
WaW_042	Brazil	BRA	UMC	Rio De Janeiro	BRA.19.67_1	2	1		1.43	2014	100	2014	21.2371	2014			0	2014	0.5	2014	0	2014	100	2014
WaW_043	Brazil	BRA	UMC	Brasilia	BRA.7.1_1	2	1		0.784525	2016	98	2016	14.6707	2016			0	2016	0	2016	0	2016	100	2016
WaW_044	Brazil	BRA	UMC	Sao Paulo	BRA.25.564_1	2	1		1.1068	2014	97.8	2014	10.101	2014			3	2014	0	2014	0	2014	81.4433	2014
WaW_047	Burkina Faso	BFA	LIC	Bobo Dioulasso	BFA.9.1.2_1	3	2	GIS population higher than that of this data but believed to be correct scale	0.675549	1999
WaW_048	Burkina Faso	BFA	LIC	Ouagadougou	BFA.7.1.4_1	3	2	GIS population higher than that of this data but believed to be correct scale	0.65	2003	47.1	2003	10	2003
WaW_049	Burundi	BDI	LIC	Muyinga	BDI.13.6_1	2	2	Population data changed from original due to error in that reported. See comment in population cell.	0.112134	2013							0	2013	0	2013	0	2013	0	2013
WaW_050	Burundi	BDI	LIC	Kayanza	BDI.9.5_1	2	2	Population data changed from original due to error in that reported. See comment in population cell.	0.113108	2013
WaW_051	Burundi	BDI	LIC	Ngozi	BDI.15.6_1	2	2	GIS population is much higher than data population, but cross comparison on GIS seems to match	0.463845	2013							0	2013	0	2013	0	2013	0	2013
WaW_052	Burundi	BDI	LIC	Bujumbura	BDI.2_1	1	2	GIS population is slightly higher. Data allocated to level 1 as has best match with city boundaries	1.4	2013	14	2013					0	2013	0	2013	0	2013	0	2013
WaW_053	Cote d Ivoire	CIV	LMC	Abidjan	CIV.1.1.1_1	3	1	Good match with population and city boundaries.	0.79221	2010	48	2010	7.84314	2010
WaW_054	Cambodia	KHM	LMC	Phnom Penh	KHM.16_1	1	1	Added to level 1 due to Phnom Penh being a special administrative unit essentially acting as a municipality	1.12652	2015	84	2015	6	2015			0.15	2015	0	2015	0	2015	0	2015
WaW_055	Cameroon	CMR	LMC	Limbe	CMR.9.1_1	2	2	Added to department level (Lv2) as Lv3 splits Limbe					12.4
WaW_056	Cameroon	CMR	LMC	Douala	CMR.5.4_1	2	1	Also called Wouri	0.7	2000	60	2000
WaW_057	Cameroon	CMR	LMC	Yaounde	CMR.2.7_1	2	2	GIS population slightly lower. Also called Mfoundi	1.01798	2012	43	2012
WaW_058	Cameroon	CMR	LMC	Bafoussam	CMR.8.6_1	2	1	Population better matches Lv3 but boundary better matches Lv2. Chose Lv2 as matches other city levels in country.	0.425864	2000
WaW_059	Canada	CAN	HIC	Ottawa	CAN.9.35_1	2	1		0.953083	2013			7.3	2013					42.5	2013
WaW_060	Canada	CAN	HIC	Toronto	CAN.9.50_1	2	1		0.922407	2016			10.9671	2016			3.49009	2016	47.91	2016	0	2016	100	2016
WaW_061	Canada	CAN	HIC	Vancouver	CAN.2.14_1	2	1		1.01087	2014			17	2014
WaW_062	Chile	CHL	HIC	Santiago De Chile	CHL.14.5_1	2	3	Santiago is split into multiple districts at all levels. Think Santiago at level 2 OR 3 best matches but data population is much bigger than GIS population.	1.22561	2013	98	2013	9.52381	2013			0	2013	0	2013	0	2013	100	2013
WaW_063	China	CHN	UMC	Beijing	CHN.2.1_1	2	1	Data poitn matches best with level 2.	1.06221	2015			12.7	2015			2	2015	0	2015	8	2015	100	2015
WaW_064	Colombia	COL	UMC	Cali	COL.30.32_1	2	1		0.832911	2009	99	2015	3.21	2015			0	2015	15	2015	0	2015	100	2015
WaW_065	Colombia	COL	UMC	Medellin	COL.2.68_1	2	1		0.535593	2015	98.9	2013	9.37	2013			0	2013	16	2013	0	2013	100	2013
WaW_066	Colombia	COL	UMC	Bogota	COL.14.79_1	2	1		0.699696	2011	100	2013	19.03	2013			0	2013	17	2013	0	2013	100	2013
WaW_067	Comoros	COM	LIC	Moroni	COM.2_1	1	3	Level 1 is at the island level, of which Morini is within. The GIS population is much bigger than the data population for this reason but the city is assumed representative of the island.			60						0		0		0		40
WaW_068	Democratic Republic of the Congo	COD	LIC	Kinshasa	COD.10.1_1	2	2	Data has much higher population than GIS but area matches well	0.604125	2016							0	2016	0	2016	0	2016	0	2016
WaW_069	Republic of Congo	COG	LMC	Dolisie	COG.8.4_1	2	2	Data has much higher population than GIS and level 2 covers area bigger than that of city, but is the most granular	0.506128	2012			6.2	2012
WaW_070	Costa Rica	CRI	UMC	Alajuela	CRI.1.1_1	2	2	Small mismatch in populations due to admin boudnaries not fully matching entirety of city	0.869596	2016	100	2016	12.6	2016			0	2016	0.42	2016	0	2016	100	2016
WaW_071	Costa Rica	CRI	UMC	San Jose	CRI.7.15_1	2	2	Small mismatch in populations due to admin boudnaries not fully matching entirety of city	1.17141	2010	100	2016	10	2016			0	2016	5.2	2016	0	2016	99.5992	2016
WaW_072	Croatia	HRV	HIC	Zagreb	HRV.4.7_1	2	1		1.02013	2015	100	2015	21.9	2015
WaW_073	Croatia	HRV	HIC	Cakovec	HRV.10.2_1	2	1		1.50961	2015
WaW_074	Cuba	CUB	UMC	Havana	CUB.4_1	1	1	Data fits with level 1 best.	0.7	2015	100	2015	8	2015			0	2015	0	2015	0	2015	97	2015
WaW_076	Cyprus	CYP	HIC	Paralimini	CYP.1_1	1	2	Data is at city level but admin layer goes to regional level as a maximum. It is therefore assumed this city data is representative of the region.					17
WaW_077	Czech Republic	CZE	HIC	Karlovy Vary	CZE.3.2_1	2	2	Data population is more than GIS popualtion but believed to be good match otherwise	1.20411	2014
WaW_078	Czech Republic	CZE	HIC	Prague	CZE.11_1	1	1	Good match at level 1 but default is level 2 - municipality level	0.88349	2013
WaW_079	Denmark	DNK	HIC	Copenhagen	DNK.1.25_1	2	1		1.12346	2014	100	2014
WaW_080	Djibouti	DJI	LMC	Djiibouti City	DJI.3.1_1	2	1		0.594059	2002							0	2002	0	2002	0	2002	0	2002
WaW_081	Dominican Republic	DOM	UMC	Santo Domingo	DOM.5.1_1	1 or 2	2	Main part of Santo Domingo is called Distrito Nacional however the city extends beyong this. The Data population is higher than GIS for this reason, however, the majority of the city is covered so it is deemed a reasonable match.	1.47451	2013	85	2013	8.8845	2013			0	2013	0	2013	0	2013	72	2013
WaW_082	Ecuador	ECU	UMC	Quito	ECU.19.6_1	2	1		0.955056	2012	89	2012	14.21	2012									100	2012
WaW_083	Egypt	EGY	LMC	Cairo	EGY.11_1	1	1	Added to level 1 as provided best fit	1.66667	2012	65	2012	3.8	2012
WaW_084	El Salvador	SLV	LMC	San Salvador	SLV.10.16_1	2	2	Data population much greater than GIS however this is likely due to municipality of San Salvador not covering the entirety of the city. It is deemed however a reasonable approximation	0.733625	2013	65.38	2013	11	2013			0	2013	0	2013	0	2013	100	2013
WaW_086	Estonia	EST	HIC	Tallinn	EST.1.20_1	2	1		1.41549	2012			14	2012
WaW_087	Estonia	EST	HIC	Tartummaa	EST.13.18_1	2	2	Data population larger than GIS population but area matches well					0.0699301
WaW_088	Ethiopia	ETH	LIC	Adola Woyu	ETH.8.5.1_1	3	2	Data population is significatnly smaller than GIS population but believed to be correct place.	0.270017	2015			6.30946	2015
WaW_089	Ethiopia	ETH	LIC	Bule Hora	ETH.8.3.3_1	3	2	Bule Hora is a city in the region of the same name (lv3), therefore GIS population is larger than data. The city data is assumed representative of the region.	0.570024	2015			5.4	2015
WaW_090	Ethiopia	ETH	LIC	Addis Ababa	ETH.1.1_1	1 or 2	1	Fits with level 1 Or 2 best	0.542829	2010	70	2010	12.6059	2010
WaW_091	Ethiopia	ETH	LIC	Maichew	ETH.11.1.3_1	3	2	Maichew is a town within Endamehoni district (level 3) therefore population of GIS slightly larger. Maichew data is assumed representative of Endamehoni district	0.400591	2015			5.55836	2015
WaW_092	Ethiopia	ETH	LIC	Tepi	ETH.10.18.3_1	3	2	Tepi is a town within the Yeki district (level 3), therefore GIS population slightly larger. Tepi is assumed representative of Yeki	0.35626	2015			1.00503	2015
WaW_093	Ethiopia	ETH	LIC	Gerbe Guracha	ETH.8.17.11_1	3	2	Gerbe Guracha is a town within the Kuyu district (level 3), therefore GIS population slightly larger. Gerbe Guracha is assumed representative of Kuyu	0.348937	2015			4.25441	2015
WaW_094	Ethiopia	ETH	LIC	Weldiya	ETH.3.11.5_1	3	2	Debre Tabor is a town within the Farta district (level 3), therefore GIS population slightly larger. Debre Tabor is assumed representative of Farta	0.151951	2015			7.53769	2015
WaW_095	Ethiopia	ETH	LIC	Debre Tabor	ETH.3.4.4_1	3	2	Weldiya is a town within the Guba Lafto district (level 3), therefore GIS population slightly larger. Weldiya is assumed representative of Guba Lafto	0.228699	2015			1.02041	2015
WaW_096	Ethiopia	ETH	LIC	Bati	ETH.3.9.2_1	3	2	Bati at Level 3 is actually the region which contains the town of Bati, therefore GIS population is slightly larger. It is assumed the data is representative of the region.	0.195981	2015			6.95348	2015
WaW_097	Ethiopia	ETH	LIC	Dire Dawa	ETH.5.1.1_1	3	2	Dire Dawa at level 3 is the region which contains the town of Dire Dawa, therefore the GIS population is larger. The town data here is assumed representative of the region. There is also a administrative region adjacent called Dire Dawa/Town although this does not appear to overlap the town in GIS and the population is much lower.	0.724638	2015	69	2015	9.95025	2015			0	2015	0	2015	0	2015	0	2015
WaW_098	Ethiopia	ETH	LIC	Halaba Kulito	ETH.10.1.1_1	3	2	Halaba Kulito is a town within the Alaba district (level 3), therefore GIS population slightly larger. Halaba Kulito is assumed representative of Alaba					3.6963
WaW_099	Ethiopia	ETH	LIC	Dembi Dolo	ETH.8.9.9_1	3	2	Dembi Dolo is a town within the Sayo district (level 3), therefore GIS population slightly larger. Dembi dolo is assumed representative of Sayo	0.220014	2015			2.2897	2015
WaW_100	Fiji	FJI	UMC	Suva	FJI.1.3_1	2	2	Suva is a city in the Rewa province which is the most granular level the administrative boudnaries go. Suva is assumed representative of Rewa.	0.773256	2012	100	2012	8.03213	2012
WaW_101	Finland	FIN	HIC	Oulu	FIN.3.2.3.8_1	4	2	Data population is much bigger than GIS population, but are matches well.									0		0		0		100
WaW_102	Finland	FIN	HIC	Riihimaki	FIN.5.9.4.3_1	4	1						15.7842
WaW_103	Finland	FIN	HIC	Turku	FIN.5.3.4.16_1	4	1						17.6176
WaW_104	France	FRA	HIC	Paris	FRA.8.3_1	2	1	Level 2 selected as good match on population and boundary	1.32778	2015	100	2015	16.7	2015			0	2015	17.1	2015	77.5	2015	100	2015
WaW_105	France	FRA	HIC	Angers-Loire Metropole	FRA.12.2.1_1	3	2	Waste management is at the commune level (Lv5) in France, however there are 37,000 of these and often very small so in rural areas will often join forces. Angers-Loire Metropole is a collection of communes, although not represented by the administrative boundaries, Level 3 best matches the size but is slightly larger than teh metropole therefore GIS population is slightyl bigger.	1.34668	2015	100	2015					22.9364	2015	17.66	2015	0.230869	2015	91.5182	2015
WaW_106	Gabon	GAB	UMC	Libreville	GAB.1.2_1	2	2	Regional level (Lv2) is the most granual although this is larger than the city. Libreville is within the Komo-Mondah region however and forms a large part of it therefore it is assumed to be representative.	1.61759	2005	57	2005					0	2005	0	2005	0	2005	0	2005
WaW_107	Gambia	GMB	LIC	Banjul	GMB.1_1	1	1	Data is at level 1 but default is level 2	0.661631	2002	35	2002	0	2002
WaW_108	Georgia	GEO	LMC	Tbilisi	GEO.12.1_1	2	1				100		12.9611
WaW_109	Germany	DEU	HIC	Berlin	DEU.3.1.1_1	1 or 2 or 3	1		1.03842	2015			8	2015			0	2015	28	2015	65	2015	100	2015
WaW_110	Germany	DEU	HIC	Hamburg	DEU.6.1.1_1	1 or 2 or 3	1						1.60048
WaW_111	Ghana	GHA	LMC	Accra	GHA.5.1_1	2	1		1.02041	2013	82.5	2013	10.3175	2013			0	2013	0	2013	0	2013	0	2013
WaW_112	Ghana	GHA	LMC	Kumasi	GHA.1.16_1	2	1		0.74	2015			17.5824	2015
WaW_113	Greece	GRC	HIC	Athens	GRC.3.1.12_1	3	1		1.28081	2012			0.00995818	2012
WaW_114	Greece	GRC	HIC	Thessaloniki	GRC.6.1.35_1	3	2	Data population bigger than GIS as municipality boundary is smaller than city boundary, but is a close match	1.01015	2015			13.9	2015
WaW_115	Guatemala	GTM	UMC	Guatemala City	GTM.7_1	1	1	Added to level 1 as best fit	0.629458	2013	72	2013	17	2013			0	2013	0	2013	0	2013	0	2013
WaW_116	Guatemala	GTM	UMC	Antigua Guatemala	GTM.16.2_1	2	1		0.560026	2011			12	2011
WaW_117	Guatemala	GTM	UMC	Jutiapa	GTM.11.10_1	2	2	Data population larger than GIS but area matches well	0.357144	2014	12.5	2014	11.8118	2014			0	2014	0	2014	0	2014	0	2014
WaW_118	Guinea	GIN	LIC	Conakry	GIN.2.1_1	2	1		0.755477	1996	76	1996	5.30531	1996
WaW_119	Haiti	HTI	LIC	Port Au Prince	HTI.8.5_1	2	1	Added to level 2 as best match	0.7	2015	12.4	2015	15.4	2015			0	2015	0	2015	0	2015	100	2015
WaW_120	Honduras	HND	LMC	Tegucigalpa	HND.8.4_1	2	1		0.754296	2015	97	2015	8.16327	2015									92.4997	2015
WaW_121	Honduras	HND	LMC	San Pedro Sula	HND.6.10_1	2	1		0.931526	2016	59	2016	11.2611	2016
WaW_122	Hungary	HUN	HIC	Debrecen	HUN.9.3_1	2	1						15.4277
WaW_123	Hungary	HUN	HIC	Budapest	HUN.5.1_1	2	1		1.57035	2014			21.1577	2014			0	2014	0	2014	52	2014	0	2014
WaW_124	India	IND	LMC	Greater Mumbai	IND.20.18_1+IND.20.17_1	2	2	Greater Mumbai incorporates two Level 3 vectors.	0.54841	2016	100	2016	0	2016			0	2016	0	2016	0	2016	0	2016
WaW_125	India	IND	LMC	Delhi	IND.25.1.1_1	1 or 2 or 3	1		0.993907	2014	76.5	2014	0	2014			12.7243	2014	0	2014			0	2014
WaW_126	India	IND	LMC	Bengaluru	IND.16.3.2_1	3	2	Added to level 3 but could possible represent Level 2.	0.487661	2016	85	2016	12	2016			17.5015	2016	0	2016	0	2016	0	2016
WaW_127	India	IND	LMC	Greater Hyderabad	IND.32.2.1_1	3	3	Data population much larger than GIS data as represents Greater Hyderabad where GIS only represents Hyderabad. Greater Hyderabad assumed representative of Hyderabad.	0.75109	2016	89	2016	8.60484	2016			48.8889	2016	0	2016	0	2016	21.7391	2016
WaW_128	India	IND	LMC	Chennai	IND.31.2_1	2	2	Chennai is split into several level 3 areas. This data was therefore added to level 2 instead. GIS population is slightly smaller than city population	0.832753	2016	90	2016	7.04987	2016			1	2016	0	2016	0	2016	100	2016
WaW_129	India	IND	LMC	Ahmedabad	IND.11.1.1_1	3	2	Data population slightly bigger than GIS population	0.518516	2016	98	2016	10	2016			42.623	2016					100	2016
WaW_130	India	IND	LMC	Surat	IND.11.28.2_1	3	1	GADM layer actually called Chorasi	0.31865	2016	97	2016					23.6181	2016	0	2016	0	2016	0	2016
WaW_131	India	IND	LMC	Pune	IND.20.26.7_1	3	1	Level 3 name is n.a. ( 1612). Both this Pune data row and that of the Pimpri-Chinchwad data row (below) fall within the Level 3 boundary called n.a. ( 1612). Applied a weighted average based on population between both when entering data into adminstrative boundaries form and summed population.	0.560922	2016	97	2016	5	2016			30.9715	2016	0	2016	0	2016	0	2016
WaW_132	India	IND	LMC	Jaipur	IND.29.17.6_1	3	1		0.502914	2016	97	2016					16.7331	2016	0	2016	0	2016	0	2016
WaW_133	India	IND	LMC	Lucknow	IND.34.49.1_1	3	1		0.506845	2016	97	2016	0	2016			23.4694	2016	0	2016	0	2016	0	2016
WaW_134	India	IND	LMC	Kanpur	IND.34.43.3_1	3	1		0.597023	2016	90.8	2016	2.25338	2016			57.1394	2016	0	2016
WaW_135	India	IND	LMC	Nagpur	IND.20.19.8_1	3	2	Data population bigger than GIS data but believed to be correct location	0.454656	2016	96	2016	12	2016			15.625	2016	0	2016	0	2016	0	2016
WaW_136	India	IND	LMC	Indore	IND.19.23.2_1	3	1		0.451264	2016	100	2016	3.5	2016			50	2016	0	2016	0	2016	0	2016
WaW_137	India	IND	LMC	Ludhiana	IND.28.12.3_1	3	1		0.597826	2016	29.3	2016	16.0481	2016			0	2016	0	2016	0	2016	0	2016
WaW_138	India	IND	LMC	Bhopal	IND.19.9.2_1	3	1		0.50844	2016	87.5	2016					21.85	2016	0	2016	0	2016	0	2016
WaW_139	India	IND	LMC	Vishakhapatnam	IND.2.10.8_1	3	1		0.561301	2016	100	2016	0	2016			0	2016	0	2016	0	2016	0	2016
WaW_140	India	IND	LMC	Pimpri-Chinchwad	IND.20.26.7_1	3	1	Level 3 name is n.a. ( 1612). Both this Pimpri-Chinchwad data row and that of the Pune data row (above) fall within the Level 3 boundary called n.a. ( 1612). Applied a weighted average based on population between both when entering data into adminstrative boundaries form and summed population.	0.431211	2016	100	2016	13.718	2016			75	2016					98.1862	2016
WaW_141	India	IND	LMC	Patna	IND.5.26.4_1	3	2	GIS population slightly bigger than data as covers larger area.	0.846152	2016	65	2016					0	2016	0	2016	0	2016	0	2016
WaW_142	India	IND	LMC	Ghaziabad	IND.34.30.1_1	3	2	GIS population much bigger than data as covers larger area.	0.451887	2016	100	2016	9.12	2016			40	2016	0	2016	0	2016	0	2016
WaW_143	India	IND	LMC	Nashik	IND.20.22.7_1	3	1		0.273907	2016	100	2016					0	2016	0	2016	0	2016	36.3636	2016
WaW_144	India	IND	LMC	Rajkot	IND.11.26.11_1	3	1		0.373659	2016	99	2016	2.11	2016			0	2016	0	2016	0	2016	0	2016
WaW_145	India	IND	LMC	Faridabad	IND.12.3.1_1	3	2	GIS population slightly bigger than data as covers larger area.	0.469573	2016			16.08	2016			46.397	2016	0	2016	0	2016	0	2016
WaW_146	India	IND	LMC	Allahabad	IND.34.45.1_1	3	2	Data population lower than that of GIS data as GIS vector covers area larger than city.	0.853682	2016	65	2016					28	2016	0	2016	0	2016	0	2016
WaW_147	India	IND	LMC	Dhanbad	IND.15.4.2_1	3	2	GIS population much bigger than data as covers larger area.	0.542549	2016	86	2016
WaW_148	India	IND	LMC	Srinagar	IND.35.6.2_1	3	3	Data population much bigger than GIS depsite GIS vector covering larger area. Srinagar falls in the Pauri GADM level 3 layer.	0.423313	2016	60	2016					0	2016	0	2016	0	2016	0	2016
WaW_149	India	IND	LMC	Vijaywada	IND.2.5.10_1	3	2	Populations match reasonably well however GIS vector actually covers a much larger area than the city itself	0.499212	2016	100	2016					25.5	2016	0	2016	0	2016	0	2016
WaW_150	India	IND	LMC	Amritsar	IND.28.1.2_1	3	1	Also called Baba Bakala	0.550167	2016	48.15	2016	1	2016			0	2016	0	2016	0	2016	0	2016
WaW_151	India	IND	LMC	Navi Mumbai	IND.20.33.7_1	3	2	GIS population much bigger than data as covers larger area. GADM level 3 called Thane and incorporates both Thane and Navi Mumbai. Data assumned representative of both	0.591898	2016	98	2016	0	2016			82	2016	0	2016	0	2016	100	2016
WaW_152	India	IND	LMC	Gwalior	IND.19.20.2_1	3	2	GIS population slightly bigger than data as covers larger area.	0.500734	2016	71	2016	11.2534	2016			39.5	2016	0	2016	0	2016	0	2016
WaW_153	India	IND	LMC	Mysore	IND.16.23.4_1	3	1		0.431395	2016	88.06	2016	13	2016			61.7284	2016	0	2016	0	2016	100	2016
WaW_154	India	IND	LMC	Coimbatore	IND.31.3.1_1	3	2	GIS population much bigger than data as covers larger area.	0.88695	2016	95.5	2016	0	2016			69.0323	2016					100	2016
WaW_155	India	IND	LMC	Jodhpur	IND.29.22.3_1	3	2	GIS population slightly bigger than data as covers larger area. Level 3 name is n.a. ( 652)	0.417796	2016	79	2016	15.3446	2016			31.385	2016	0	2016	0	2016	0	2016
WaW_156	India	IND	LMC	Kota	IND.29.24.2_1	3	1	There are two Kota's in India. This is believed to apply to the one in the Rajasthan state due to close match in population	0.911013	2016	65	2016	15	2016			0	2016	0	2016	0	2016	0	2016
WaW_157	India	IND	LMC	Guwahati	IND.4.15.1_1	3	1	There are three Level 3 'Guwahait's'. This data was added to the one named 'Kamrup Metropolitan' in Level 2. Data was still added at the Level 3 however.	0.750846	2016	85	2016					9.85577	2016	0	2016	0	2016	0	2016
WaW_158	India	IND	LMC	Bhubaneswar	IND.26.19.1_1	3	1		0.62072	2016	100	2016					0	2016	0	2016	0	2016	0	2016
WaW_159	India	IND	LMC	Warangal	IND.32.10.1_1	3	1		0.487015	2016	100	2016	13.74	2016			5.73687	2016	0	2016	0	2016	0	2016
WaW_160	India	IND	LMC	Cuttack	IND.26.7.3_1	3	2	GIS population much bigger than data as covers larger area.	0.357144	2016	84	2016					0	2016	0	2016	0	2016	0	2016
WaW_161	India	IND	LMC	Kochi	IND.17.2.3_1	3	2	Assumed to better represent the mainland area of Kochi (Cochi) known as Ernakulum	0.32765	2016	100	2016	21.6	2016			51.4031	2016	0	2016	0	2016	99.7375	2016
WaW_162	India	IND	LMC	Tirunelveli	IND.31.27.9_1	3	1		0.444346	2016	90	2016					0	2016	0	2016	0	2016	0	2016
WaW_163	India	IND	LMC	Kozhikode	IND.17.8.1_1	3	2	Data population is much smaller than GIS population as GIS boundary is larger than just the city.	0.817826	2016	85	2016					29.4118	2016	0	2016	0	2016	0	2016
WaW_164	India	IND	LMC	Imphal	IND.21.5.1_1	3	2	Population matches reasonably well however GIS GADM layer shows it actually splits the city of Imphal in half, with the Imphal named vector covering the western portion of the city.	0.298237	2016	100	2016	5	2016
WaW_165	India	IND	LMC	Shimla	IND.13.9.9_1	3	2	Data population bigger than GIS data but believed to be correct location	0.611059	2016	90	2016					0	2016	0	2016	0	2016	0	2016
WaW_166	India	IND	LMC	Tenali	IND.2.4.7_1	3	2	GIS population slightly bigger than data as covers larger area.	0.593791	2016	97	2016	0	2016			3.38164	2016	0	2016	0	2016	0	2016
WaW_167	India	IND	LMC	Rudrapur	IND.35.12.1_1	3	2	GIS population bigger than data as covers larger area. Lvel 3 name is Bazpur	0.457136	2016	92	2016					0	2016	0	2016	0	2016	0	2016
WaW_168	India	IND	LMC	Tadipatri	IND.2.1.10_1	3	2	GIS population slightly bigger than data as covers larger area. Called Tadpatri in GADM	0.369518	2016	100	2016	12.5	2016			70	2016	0	2016	0	2016	0	2016
WaW_169	India	IND	LMC	Itanagar	IND.3.10.1_1	3	2	GIS population slightly bigger than data as covers larger area. There are three level 3 Itanagars, here we chose the data to represent Itanagar with Level 2 name 'Lower Subansiri' as this matched with the town of Itanagar.	1.34454	2016	75	2016	7	2016			83.8926	2016	0	2016	0	2016	0	2016
WaW_170	India	IND	LMC	Leh	IND.14.13.1_1	3	2	GIS population much bigger than data population as covers are muhch larger than the town. Believed to be the same place however. Level 3 name is n.a. ( 1)	1.90169	2016	100	2016					0	2016	0	2016	0	2016	0	2016
WaW_171	Indonesia	IDN	LMC	Jakarta	IDN.7_1	1	1	Added to level 1 as best fit	0.798701	2010	80	2010	13.2487	2010			0	2010	0	2010	0	2010	0	2010
WaW_172	Iran	IRN	UMC	Tehran	IRN.28.8_1	2	1	Population slightly higher in data than GIS but generally good match	0.931926	2014	100	2014	7	2014			51.9	2014	4	2014			0	2014
WaW_173	Iraq	IRQ	UMC	Baghdad	IRQ.10.1_1	2	2	Population of data more than GIS data but area matches very well with the city	1.37216	2015	93.7	2015					0	2015	0	2015	0	2015	0	2015
WaW_174	Ireland	IRL	HIC	Dublin	IRL.6_1	1	2	Population of data half that of GIS, this is due to adminsitrative levels only going up to county level so larger than city.	0.741978	2012	100	2012	8	2012			0	2012	49	2012	0	2012	0	2012
WaW_176	Israel	ISR	HIC	Jerusalem	ISR.6_1	1	1												5
WaW_177	Israel	ISR	HIC	Tel Aviv	ISR.7_1	1	2	Population of data more than GIS data but area matches very well with the city									0		10.6		0		0
WaW_178	Italy	ITA	HIC	Milano	ITA.10.8_1	2	1	Although best match level 3, believe level 2 is more likely to be the level at which waste is managed in Italy so added to Lv 2	1.48004	2015	100	2015	12.6	2015			0	2015	49.9	2015	43.472	2015	100	2015
WaW_179	Italy	ITA	HIC	Parma	ITA.6.5_1	2	1	Although best match level 3, believe level 2 is more likely to be the level at which waste is managed in Italy so added to Lv 2	1.38016	2014	100	2014	26.4	2014			0	2014	72	2014	0	2014	0	2014
WaW_180	Japan	JPN	HIC	Osaka	JPN.33.27_1	2	1		1.04403	2015	100	2015	19.9	2015			0	2015	9.67	2015	78.0665	2015	100	2015
WaW_181	Japan	JPN	HIC	Kobe	JPN.13.22_1	2	1		0.990379	2015	100	2015	13.4	2015			0	2015	14.89	2015	72.6028	2015	100	2015
WaW_182	Japan	JPN	HIC	Naha	JPN.32.21_1	2	1		0.849925	2015	100	2015	31.5	2015			0	2015	15.01	2015	81.4956	2015	100	2015
WaW_183	Japan	JPN	HIC	Toyama	JPN.43.14_1	2	1		1.06983	2015	100	2015	15.1	2015			0.394095	2015	24.28	2015	68.2143	2015	100	2015
WaW_184	Japan	JPN	HIC	Kitakyushu	JPN.7.25_1	2	1		1.15354	2015	100	2015	8.70871	2015			0	2015	25.38	2015	64.9163	2015	100	2015
WaW_185	Japan	JPN	HIC	Yokohama	JPN.19.29_1	2	1		0.868767	2015	100	2015	11.88	2015			0	2015	25.543	2015	65.5533	2015	100	2015
WaW_186	Jordan	JOR	UMC	Amman	JOR.2_1	1	1	Added to level 1 as population matched better than level 2	1.13792	2015	100	2015	16	2015			0	2015	0	2015	0	2015	90	2015
WaW_187	Kazakhstan	KAZ	UMC	Atyrau	KAZ.4.1_1	2	1		0.993029	2015	100	2015	8.3	2015			0	2015	0	2015	0	2015	0	2015
WaW_188	Kazakhstan	KAZ	UMC	Kostanay	KAZ.10.13_1	2	2	Data population lower than that of GIS data			77
WaW_189	Kenya	KEN	LMC	Nairobi	KEN.30_1	1	1		0.745246	2013	50	2013	16.1161	2013			0	2013	0	2013	0	2013	0	2013
WaW_190	Kenya	KEN	LMC	Eldoret	KEN.44_1	1	3	Data is believed to be at the city level. As such the population of the data is much lower than that of the County, however it is deemed a good match by area			45	2005					0	2005	0	2005	0	2005	0	2005
WaW_191	Kiribati	KIR	LMC	South Tarawa	KIR	0	1		0.5	2015	38	2015	6.59341	2015			0	2015	0	2015	0	2015	0	2015
WaW_192	South Korea	KOR	HIC	Seoul	KOR.16_1	1	1	Added to level 1 due to Seoul being a special administrative unit essentially acting as a municipality	0.900529	2012			5.9	2012			29	2012	36	2012	8	2012	100	2012
WaW_193	Kosovo	XKO	LMC	Gjilan	XKO.2.1_1	2	1		0.821781	2011							0	2011	0	2011	0	2011	0	2011
WaW_194	Kosovo	XKO	LMC	Pristina	XKO.5.7_1	2	1		1.70813	2015	100	2015	14.78	2015			0	2015	0	2015	0	2015	88.8889	2015
WaW_195	Kuwait	KWT	HIC	Kuwait City	KWT	0	2	Population best matched with Level 0 therefore added to this level.			100						0		0		0		0
WaW_196	Kyrgyzstan	KGZ	LMC	Bishkek	KGZ.2_1	1	1		1.72524	2015	100	2015	7	2015
WaW_197	Kyrgyzstan	KGZ	LMC	Osh	KGZ.6_1	1	2	Data matches well but waste generation seems unreasonably high	3.03906	2015	80	2015	13.1113	2015			0	2015	0	2015	0	2015	0	2015
WaW_198	Laos	LAO	LMC	Vientiane	LAO.13_1	1	1		0.638917	2011	48	2011	12	2011			0	2011	0	2011	0	2011	55.5556	2011
WaW_199	Latvia	LVA	HIC	Liepaja	LVA.1.2_1	2	2	GIS population slightly bigger than data as covers larger area.			95		9.09091
WaW_200	Latvia	LVA	HIC	Riga	LVA.3.3_1	2	2	GIS population slightly bigger than data as covers larger area.	1.3301	2014
WaW_201	Lebanon	LBN	UMC	Beirut	LBN.3.1_1	2	1	Added to level 1 or 2 as best match/ Boundaries are the same across these levels	1.01159	2015	100	2015	13	2015			10.5263	2015					97.5263	2015
WaW_202	Lebanon	LBN	UMC	Saida	LBN.8.3_1	3	2	Added to the Level 2 as this covers the majority of Saida.	0.666667	2016	100	2016	17	2016			60	2016	20	2016	0	2016	0	2016
WaW_203	Liberia	LBR	LIC	Monrovia	LBR.11.2_1	2	1		0.738636	2007	20	2007	11	2007
WaW_204	Libya	LBY	UMC	Tripoli	LBY.20_1	1	1		0.64	2015	100	2015	18.6186	2015
WaW_205	Lithuania	LTU	HIC	Kaunas	LTU.2.4_1	2	1		1.22307	2013	100	2013	19.6071	2013			0	2013	13	2013	0	2013	100	2013
WaW_206	Lithuania	LTU	HIC	Vilnius	LTU.10.6_1	2	1		1.56437	2013	98	2013	9.91984	2013			0	2013	36	2013	0	2013	100	2013
WaW_207	Macedonia	MKD	UMC	Skopje	MKD.10_1	1	2	Skopje is split into several municipalities therefore this data was added to 'Cair' which is the centre most municipality covering the majority of the city. The GIS population is significantly smaller than the data point population as it appears the GIS population is not fully aligned with the city itself	1.1317	2016	87.83	2016	12.4	2016			0	2016	0	2016	0	2016	97.9381	2016
WaW_208	Macedonia	MKD	UMC	Kratovo	MKD.37_1	1	1		0.436127	2015			4.6	2015
WaW_209	Madagascar	MDG	LIC	Antananarivo	MDG.1.1.7_1+MDG.1.1.5_1+MDG.1.1.6_1+MDG.1.1.1_1	3	2	Data added to level 3 as matches boundaires of the city well, however there is a big difference in the population with the GIS population being much smaller. Also added the suburbs even though other Lv3 districts	0.476221	2016	88.5	2016	11.0922	2016
WaW_210	Malawi	MWI	LIC	Blantyre	MWI.2.1_1	2	1		0.390831	2013	30	2013
WaW_211	Malawi	MWI	LIC	Lilongwe	MWI.11.1_1	2	1		0.356052	2013	30	2013
WaW_212	Malaysia	MYS	UMC	Kuala Lumpur	MYS.4.1_1	2	2	Data population much greater than GIS data as it likely represent the wider metropolitan area of Kuala Lumpur whereas the GADM Kuala Lumpur boundary (lv 2) represents only the Federal Territory of KL.	0.801441	2016	80	2016	24.74	2016			0	2016	10.4	2016	0	2016	0	2016
WaW_216	Maldives	MDV	UMC	Maldives	MDV	0	3		1.45073	2017	100	2017	9.27867	2017			0	2017	0	2017	0	2017	0	2017
WaW_217	Mali	MLI	LIC	Bamako	MLI.1.1.1_1	1 or 2 or 3	1		0.820568	2008	57	2008	14.0351	2008
WaW_218	Mali	MLI	LIC	Sikasso	MLI.8.5_1	2	1	Added to Lv2 despite being a better fit for Lv3 as believed it is more likely the level at which waste is managed	0.569498	2012	25	2012					0	2012	0	2012	0	2012	0	2012
WaW_219	Marshall Islands	MHL	UMC	Majuro	MHL	0	1		0.891532	2013	66	2013	12.5	2013
WaW_220	Mauritania	MRT	LMC	Nouakchott	MRT.10.1_1	2	1				15		21
WaW_221	Mexico	MEX	UMC	Guadalajara	MEX.14.43_1	2	1		1.21739	2013	100	2013	18.96	2013									100	2013
WaW_222	Mexico	MEX	UMC	Mexico City	MEX.9_1	1	1	Added to level 1 as Mexico City is an autonomous region and the Level 1 boundary better fits the population and city boundaries	1.47824	2015	98.54	2015	13.16	2015			12.7619	2015	14.19	2015			94.1859	2015
WaW_223	Mexico	MEX	UMC	Monterrey	MEX.19.39_1	2	2	Data population is bigger than GIS population as the GIS administrative boundary does not cover the entirity of the city.	1.1452	2016	92.78	2016	16.1832	2016			0	2016	0	2016	0	2016	100	2016
WaW_224	Micronesia	FSM	LMC	Pohnpei	FSM.3_1	1	1		0.451929	2012	80	2012	25	2012
WaW_225	Moldova	MDA	LMC	Soldanesti	MDA.30_1	1	2	GIS population much bigger than data as covers larger area.	0.759482	2013	98	2013	9.10911	2013
WaW_226	Moldova	MDA	LMC	Chisinau	MDA.10_1	1	1		0.981678	2015	100	2015	5	2015
WaW_227	Mongolia	MNG	LMC	Ulaanbaatar	MNG.21.1_1	2	1		2.1886	2015	100	2015	18	2015			0	2015	0	2015	0	2015	0	2015
WaW_228	Montenegro	MNE	UMC	Podgorica	MNE.16_1	1	1		1.81284	2013	69.7	2013	15.61	2013			0	2013	0	2013	0	2013	100	2013
WaW_229	Montenegro	MNE	UMC	Kotor	MNE.10_1	1	1		1.23157	2013							0	2013	0	2013	0	2013	59.98	2013
WaW_230	Morocco	MAR	LMC	Rabat	MAR.11.2_1	2	1	Added to level 2 despite as better matched with city boundaries and population	1	2014	90	2014											100	2014
WaW_231	Morocco	MAR	LMC	Tangier	MAR.14.4_1	2	3	City of Tangier is split into several administrative districts. This data was allocated to the Level 2 as closer match to population	0.871731	2017	31	2017	11	2017			0	2017	0	2017	0	2017	0	2017
WaW_232	Morocco	MAR	LMC	Beni Mellal	MAR.13.2.6_1+MAR.13.2.1_1	3	3	City of Beni Mellal is split into 2 administrative districts. This data was allocated to theboth level 3 districts depsite it increasing the population more than the data suggests	0.754214	2016			7	2016
WaW_233	Mozambique	MOZ	LIC	Maputo	MOZ.5.2_1	2	1		1	2016	75	2016	10	2016			0	2016	0	2016	0	2016	0	2016
WaW_234	Myanmar	MMR	LMC	Yangon	MMR.15.4_1+MMR.15.1_1	2	2	Yangon split into two Level 2 districts. This data was added to both districts	0.412536	2016			8	2016			0	2016	0	2016	0	2016	0	2016
WaW_235	Myanmar	MMR	LMC	Mandalay	MMR.8.2_1	2	2	GIS population much bigger than data as covers larger area.	0.94	2017	80	2017	15	2017
WaW_236	Namibia	NAM	UMC	Windhoek	NAM.5.10_1+NAM.5.3_1+NAM.5.7_1+NAM.5.4_1+NAM.5.6_1+NAM.5.5_1+NAM.5.1_1+NAM.5.2_1+NAM.5.8_1	2	1	Windohoek is split into several districts. This data was added to all that cover the boundaries of the city	0.752688	2000	93	2000	16	2000
WaW_237	Nepal	NPL	LIC	Kathmandu	NPL.1.1.3_1	3	1		0.534653	2012	86.9	2012	20.14	2012			0	2012	0	2012	0	2012	100	2012
WaW_238	Nepal	NPL	LIC	Pokhara	NPL.5.2.2.32_1	4	1	There are two Pokhara's, this was added to PokharaN.P. as better match with city and population	0.44194	2012	42.7	2012	9.92099	2012			0	2012	0	2012	0	2012	100	2012
WaW_239	Nepal	NPL	LIC	Lalitpur	NPL.1.1.5.27_1	4	1		0.522207	2012	71.2	2012	15.5616	2012			0	2012	0	2012	0	2012	100	2012
WaW_240	Nepal	NPL	LIC	Biratnagar	NPL.2.1.3.13_1	4	1	Called BitartnagarN.P.	0.332325	2012	85.7	2012	11.99	2012			0	2012	0	2012	0	2012	0	2012
WaW_241	Nepal	NPL	LIC	Bharatpur	NPL.1.3.2.5_1	4	1	There are three Bharatpur's this was added to BharatpurN.P. as better match with city and population	0.400062	2012	25.4	2012	5.61	2012			0	2012	0	2012	0	2012	0	2012
WaW_242	Nepal	NPL	LIC	Birgunj	NPL.1.3.4.20_1	4	1		0.698397	2012	39.3	2012	14.4629	2012			0	2012	0	2012	0	2012	0	2012
WaW_243	Nepal	NPL	LIC	Butwal	NPL.5.3.6.14_1	4	2	Data population is larger than GIS but area seems to match with city boundaries well. The difference in population is believed to come from innacuracy in the locaiton of the population distriution in GIS.	0.357653	2012	62.7	2012	13.46	2012			0	2012	0	2012	0	2012	0	2012
WaW_244	Nepal	NPL	LIC	Dharan	NPL.2.1.5.18_1	4	2	Data population is higher than GIS but this is believed to be inaccuracies in the location of the population distribution in GIS dataset.	0.618099	2012	68.7	2012	16.19	2012			0	2012	0	2012	0	2012	0	2012
WaW_245	Nepal	NPL	LIC	Bhaktapur	NPL.1.1.1.3_1	4	1		0.399369	2012	86.5	2012	13.2387	2012			0	2012	0	2012	0	2012	0	2012
WaW_246	Nepal	NPL	LIC	Dhankuta	NPL.2.1.2.15_1	4	1	There are two Dhankuta's this was added to DhankutaN.P. as better match with city and population	0.321694	2012	81.1	2012	17.85	2012			0	2012	0	2012	0	2012	100	2012
WaW_247	Nepal	NPL	LIC	Bhimeshwor	NPL.1.2.2.4_1	4	1	There is a Bhimeshwor and a BhimesworN.P.. This data was added to the latter as it covers the municipality of Bhimeswor and has a similar population.	0.121695	2012			8.17	2012
WaW_248	Nepal	NPL	LIC	Badimalika	NPL.3.2.3.24_1	4	1	Called Martadi in GADM dataset	0.131268	2016			6.87069	2016			0	2016	0	2016	0	2016	0	2016
WaW_249	Netherlands	NLD	HIC	Amsterdam	NLD.9.4_1	2	1		1.11153	2013			6.4	2013			0	2013	14	2013	0	2013	0	2013
WaW_250	Netherlands	NLD	HIC	Eindhoven	NLD.8.21_1	2	1						13.5922
WaW_251	New Zealand	NZL	HIC	Wellington	NZL.18.8_1	2	2	GIS population bigger than data. Data has some questionable values such as 38% plastic and 40% waste collection coverage	2.16388	2010	40	2010	38	2010			1	2010	10	2010	0	2010	98.8764	2010
WaW_252	New Zealand	NZL	HIC	Auckland	NZL.1.1_1	2	1		0.438356	2011			11.2	2011			0	2011	0	2011	0	2011	0	2011
WaW_253	Nicaragua	NIC	LMC	Managua	NIC.13.2_1	2	1		1.28031	2012	82	2012	8.37	2012			0	2012	0	2012	0	2012	0	2012
WaW_254	Nicaragua	NIC	LMC	Puerto Cabezas	NIC.1.3_1	2	1		0.587889	2012	23.65	2012	6.66667	2012			0	2012	0	2012	0	2012	0	2012
WaW_255	Niger	NER	LIC	Niamey	NER.5.1.1_1	3	1		0.490196	2003	28	2003	2	2003			0	2003	0	2003	0	2003	0	2003
WaW_257	Nigeria	NGA	LMC	Lagos	NGA.25_1	1	2	Data added to Lagos State (lv 1) rather than default local authority level (Lv 2) as this data is for all of Lagos where the local authorities cover several different parts of the city. This provided a better match between the GIS population and data population, however the former is lsightly larger due to the state boundary covering some areas outside of the city.	0.5	2014	10	2014	15	2014
WaW_258	Nigeria	NGA	LMC	Kano	NGA.20.21_1	2	3	Kano split into both a state, and several local authorities within the city. As no population provided it is unclear which administrative boundary to add it to, Kano (lv2) chosen however this only aligns with a small part of the city.					4
WaW_259	Nigeria	NGA	LMC	Oyo	NGA.31.30_1	2	2	Oyo is split into Oyo East and Oyo West. This data was added to Oyo West as appears to cover more of the city and has a larger population, therefore better matching with the data.	0.170169	2008			18.8	2008
WaW_260	Nigeria	NGA	LMC	Ibadan	NGA.31.6_1	2	2	Ibadan is split into several local authorities. This data was added to Ibadan North as this appeared to cover a larger are of the city and had the highest population.	0.550546	2012	40	2012	9	2012			0	2012	0	2012	0	2012	0	2012
WaW_261	Northern Mariana Islands	MNP	HIC	Saipan	MNP.3_1	1	1		1.81	2009
WaW_262	Norway	NOR	HIC	Oslo	NOR.12.1_1	2	2	Data population more than GIS population as likely covers wider metropolitan area of Oslo	1.00274	2013	100	2013	5	2013			0	2013	37.197	2013	57.85	2013	99.8789	2013
WaW_263	Norway	NOR	HIC	Bergen	NOR.7.4_1	2	1		0.710528	2014			8	2014			0	2014	46.4	2014	39.1	2014	100	2014
WaW_264	Oman	OMN	HIC	Muscat	OMN.11_1	1	2	Based on population this data does not seem to fit any of the default Level 2 Wilayat. It is instead added to level 1 Muscat province as seems a better match, the default remains level 2 as this is the municipality level	0.71599	2017
WaW_265	Pakistan	PAK	LMC	Karachi	PAK.8.2_1	2	1	Added to level 2 despite default being level 3 as better matched data population	0.832755	2016	60	2016	6.38086	2016			0	2016	0	2016	0	2016	60	2016
WaW_267	Pakistan	PAK	LMC	Sialkot	PAK.7.4.8_1	3	3	GIS population significantly more than data population but also covers area larger than the city	0.42332	2010	25	2010	12.8	2010			0	2010	0	2010	0	2010	0	2010
WaW_268	Palau	PLW	HIC	Koror	PLW.6_1	1	1	Plastic seems very high	0.319099	2010			48	2010
WaW_269	Panama	PAN	HIC	Panama City	PAN.12.6_1	2	1		1.17365	2010	83.5	2010	12	2010			0	2010	2	2010	0	2010	66.3265	2010
WaW_270	Panama	PAN	HIC	San Miguelito	PAN.12.7_1	2	1		1.00022	2010	97.5	2010					0	2010	0	2010	0	2010	100	2010
WaW_271	Panama	PAN	HIC	Colon	PAN.4.2_1	2	1		0.874201	2010	74.8	2010					0	2010	0	2010	0	2010	0	2010
WaW_272	Papua New Guinea	PNG	LMC	Port Moresby	PNG.15.1_1	2	1		0.852174	2016	63.26	2016	18.5	2016			0	2016	0	2016	0	2016	62.6246	2016
WaW_273	Paraguay	PRY	UMC	Asuncion	PRY.4.1_1	2	1		1.5987	2010	92.2	2010	4.2	2010			0	2010	0	2010	0	2010	0	2010
WaW_274	Paraguay	PRY	UMC	Ciudad Del Este	PRY.2.1_1	2	1		1.42239	2010	89.99	2010	10.2897	2010			0	2010	0	2010	0	2010	48.8	2010
WaW_275	Paraguay	PRY	UMC	San Lorenzo	PRY.9.15_1	2	1		1.75259	2010	58.2	2010	12	2010			0	2010	0	2010	0	2010	0	2010
WaW_276	Peru	PER	UMC	Cusco	PER.8.7_1	2	1	Added to level 2 as better matches city boundaries	1.19498	2011			11.63	2011			0	2011	0.3	2011	0	2011	0	2011
WaW_277	Philippines	PHL	LMC	Quezon City	PHL.47.14_1	2	1		0.926316	2014	95	2014	9.63904	2014			0	2014	0	2014	0	2014	100	2014
WaW_278	Philippines	PHL	LMC	Cebu	PHL.25.17_1	2	1		0.682557	2016	100	2016	15	2016			0	2016	0	2016	0	2016	40	2016
WaW_279	Poland	POL	HIC	Krakow	POL.6.6_1	2	1		1.18466	2016			14.59	2016			0	2016	33	2016	0	2016	0	2016
WaW_280	Poland	POL	HIC	Lodzi	POL.3.7_1	2	1	Also called Lodz	0.590383	2015
WaW_281	Portugal	PRT	HIC	Lisbon	PRT.12.7_1	2	1	Also called Lisboa	1.56193	2014			13	2014			0	2014	21.8	2014	0	2014	0	2014
WaW_282	Portugal	PRT	HIC	Guimaraes	PRT.4.8_1	2	1		0.970428	2015	100	2015	13.3024	2015
WaW_283	Qatar	QAT	HIC	Doha	QAT.1_1	1	1	Also called Ad Dawhah	1.37	2015	100	2015
WaW_284	Romania	ROU	UMC	Bucharest	ROU.10.1_1	1 or 2	1	Also called Municipiul Bucuresti	0.928202	2014	100	2014	9.42	2014					9.44	2014
WaW_285	Romania	ROU	UMC	Cluj-Napoca	ROU.14_1	1	1	Added to level 1 as believed to be level more likely at which waste is managed	0.940003	2016	100	2016	9	2016
WaW_286	Russia	RUS	UMC	Kemerovo	RUS.27.10_1	2	1		0.972803	2016			13	2016			0	2016	1.9	2016	0	2016	0	2016
WaW_287	Russia	RUS	UMC	Moscow	RUS.43_1	1	1	Added to level 1 as better fit	1.31476	2011			13	2011			0	2011	0	2011	0	2011	0	2011
WaW_288	Russia	RUS	UMC	St petersburg	RUS.14.1_1	2	1		1.26204	2013			5.8	2013			0	2013	0	2013	0	2013	0	2013
WaW_289	Rwanda	RWA	LIC	Kigali	RWA.5_1	1	1	Data added to level 1 as waste is managed at a different level in Kegali according to https://www.igi-global.com/gateway/chapter/240081	1.9	2012	42	2012	1.50045	2012			0	2012	0	2012	0	2012	25	2012
WaW_290	Rwanda	RWA	LIC	Nyagatare	RWA.3.6_1	2	1				29
WaW_291	Samoa	WSM	UMC	Upolu (Apia)	WSM.9_1	1	2	Slight mismatch between population of data and GIS due to it being unclear if the data is for the island of Upolu or the city Apia. Administrative boundaries do not match well with either.			90		13.0452
WaW_292	Saudi Arabia	SAU	HIC	Jeddah	SAU.11_1	1	2	Data population is less than GIS due to GIS area being larger than city	1.47875	2015	100	2015	16	2015
WaW_293	Saudi Arabia	SAU	HIC	Riyadh	SAU.7_1	1	1		1.88383	2015			13.3	2015			0	2015	0	2015	0	2015	85	2015
WaW_294	Senegal	SEN	LIC	Rufisque	SEN.1.4.1_1	3	2	Data population is slightly more than GIS	0.7	2004	36	2004
WaW_295	Serbia	SRB	UMC	Novi Sad	SRB.5.6_1	2	1		1.05313	2012	100	2012	12.0824	2012			0	2012	0	2012	0	2012	0	2012
WaW_296	Serbia	SRB	UMC	Belgrade	SRB.3_1	1	1	Data added to level 1 as better match	1.80913	2012	85	2012	14.9185	2012
WaW_297	Sierra Leone	SLE	LIC	Freetown	SLE.4.2.1_1	2 or 3	1		0.56	2012	45	2012	9.24025	2012
WaW_298	Slovakia	SVK	HIC	Trnava	SVK.7.7_1	2	2	Data population smaller than GIS population as GIS area covers area bigger than just the city	2.54241	2010			5.77942	2010			0	2010	9.79	2010	0.339962	2010	99.3769	2010
WaW_299	Slovakia	SVK	HIC	Bratislava	SVK.2_1	1	1	Data added to level 1 as better match	0.926851	2013			8.80885	2013			0	2013	9.81	2013	41.02	2013	99.1255	2013
WaW_300	Slovenia	SVN	HIC	Ljubljana	SVN.7.14_1	2	1		0.880615	2014	99	2014					0	2014	61	2014	0	2014	100	2014
WaW_301	Solomon Islands	SLB	LMC	Honiara	SLB.4_1	1	1		1.01862	2014	60	2014	19.5	2014
WaW_302	Somalia	SOM	LIC	Hargeysa	SOM.18.3_1	2	1		0.361084	2008			16	2008
WaW_303	South Africa	ZAF	UMC	Johannesburg	ZAF.3.1.1_1	2 or 3	1		1.68132	2017	68.6	2017					5	2017	0	2017	0	2017	0	2017
WaW_304	South Africa	ZAF	UMC	Cape Town	ZAF.9.3.1_1	2 or 3	1		1	2012			6	2012
WaW_306	South Africa	ZAF	UMC	Bloemfontein	ZAF.2.3.1_1	2 or 3	2	Also called Mangaung. GIS population slightly bigger due to coerving an area larger than just the city					17.7				0		0		0		32.3
WaW_307	South Africa	ZAF	UMC	Durban	ZAF.4.2.1_1	2 or 3	1	Also called Ethekwini	1.42192	2007			17.4	2007
WaW_308	South Sudan	SSD	LIC	Juba	SSD.1.1.1_1	1 or 2 or 3	1		1.11	2013			20	2013
WaW_309	Spain	ESP	HIC	Madrid	ESP.8.1.3_1	3	1	Added to level 3 despite data fitting better at level 4 as it is believed most of Spain operates waste management at lv3 (comarca) level.	2.29589	2014			10.4021	2014			15	2014	10	2014	10	2014	100	2014
WaW_310	Spain	ESP	HIC	Pamplona	ESP.9.1.9_1	3	1	Added to level 3 despite data fitting better at level 4 as it is believed most of Spain operates waste management at lv3 (comarca) level.	1.9786	2014			8.19181	2014			0	2014	32	2014	0	2014	100	2014
WaW_311	Sri Lanka	LKA	LMC	Colombo	LKA.5.1_1	2	1		2.43674	2016	93	2016	9.18164	2016			0.970291	2016	0	2016	0	2016	0	2016
WaW_312	Sri Lanka	LKA	LMC	Dehiwala-Mount Lavinia Municipal Council	LKA.5.2_1	2	1		0.978495	2016	95.4	2016	10.5105	2016			0.539374	2016	0	2016	0	2016	0	2016
WaW_313	Sri Lanka	LKA	LMC	Moratuwa	LKA.5.9_1	2	1		0.72716	2016	71	2016	10.5105	2016			18.7583	2016	0	2016	0	2016	79.0244	2016
WaW_314	Sri Lanka	LKA	LMC	Jaffna	LKA.9.4_1	2	1		1.27127	2016	80.7	2016	4	2016			6.57016	2016	0	2016	0	2016	0	2016
WaW_315	Sri Lanka	LKA	LMC	Trincomalee	LKA.24.10_1	2	1		1.23518	2016	65.6	2016	3	2016			5.83942	2016	0	2016	0	2016	0	2016
WaW_316	Sri Lanka	LKA	LMC	Kurunegala	LKA.14.15_1	2	1		1.89872	2016	93.2	2016	6.19381	2016			3.14685	2016	0	2016	0	2016	0	2016
WaW_317	Sweden	SWE	HIC	Stockholm	SWE.15.18_1	2	1		1.21813	2013	100	2013	10.1898	2013			0	2013	21	2013	71.0101	2013	100	2013
WaW_318	Sweden	SWE	HIC	Boras	SWE.21.6_1	2	1		0.659085	2012	100	2012	7.04225	2012			0	2012	29	2012	54.6154	2012	100	2012
WaW_319	Switzerland	CHE	HIC	Bern	CHE.6.3_1	2	2	Data population bigger than GIS but areas seems to match	0.451519	2016									43.22	2016
WaW_321	Syria	SYR	LIC	Damascus	SYR.5.1_1+SYR.13.6_1	2	2	Data population suggest this could be two level 2 areas of Damascus	1.16913	2016			6.9	2016
WaW_322	Tajikistan	TJK	LIC	Dushanbe	TJK.1.1_1	2	1	Added to level 2 as better fit	1.03637	2014	94.58	2014
WaW_323	Tajikistan	TJK	LIC	Khujand	TJK.4.3_1	2	1	Added to level 2 despite level 3 being a better population match, as matches the city boundaries better	0.982946	2010	31.57	2010	10	2010
WaW_324	Tanzania	TZA	LIC	Dar Es Salaam	TZA.2_1	1	1	Data added to Level 1 despite default being level 2 as better matched data.	0.939389	2011	49	2011	1.99402	2011									57.5071	2011
WaW_325	Tanzania	TZA	LIC	Moshi	TZA.9.3_1	2	1		0.92633	2008	61	2008	9	2008			28.9855	2008	0	2008	0	2008	100	2008
WaW_326	Tanzania	TZA	LIC	Mountain Kilimanjaro	TZA.9.5_1	2	2	Data added to Rombo district as this incorpotates the peak of Mount Kilimanjaro however unclear if the data is for only this area.	0.652316	2006			24	2006
WaW_327	Thailand	THA	UMC	Bangkok	THA.3_1	1	1	Added to level 1 despite default being level 3 as better fit	1.23834	2015	100	2015	25.0125	2015			55.2467	2015					100	2015
WaW_328	Timor-Leste	TLS	LMC	Dili	TLS.7_1	1	1		0.64012	2016			17.8218	2016
WaW_329	Togo	TGO	LIC	Lome	TGO.3.1_1	2	2	Data population lower than GIS but reasonable match	0.891271	2014	64	2014	0	2014
WaW_330	Tonga	TON	UMC	Vavau	TON.5_1	1	1		1.01162	2012			13.4	2012			1.5	2012	5.1	2012	0	2012	29.3362	2012
WaW_331	Tonga	TON	UMC	Tongatapu	TON.4_1	1	1		1.08364	2012	40	2012	13.4	2012
WaW_332	Tunisia	TUN	LMC	Sfax	TUN.17_1	1	2	Data added to Level 1 as better matched data	0.703196	2013			11	2013									100	2013
WaW_333	Tunisia	TUN	LMC	Tunis	TUN.23_1	1	2	Data added to Level 1 as better matched data	0.861057	2012	61	2012	10.1055	2012									95.7542	2012
WaW_334	Tunisia	TUN	LMC	Sousse	TUN.20_1	1	2	Data added to Level 1 as better matched data	1.12812	2008	99	2008	9	2008			0	2008	0	2008	0	2008	100	2008
WaW_335	Turkey	TUR	UMC	Sakarya Mm	TUR.66_1	1	1	Data is for the metropolitan municipality which is at provincial level (Lv1)	1.06	2014			15.8841	2014					2.49	2014
WaW_336	Turkey	TUR	UMC	Bursa Metropolitan Municipality	TUR.21_1	1	1	Data is for the metropolitan municipality which is at provincial level (Lv1)	1.06	2014			15.4845	2014
WaW_337	Turkmenistan	TKM	UMC	Ashgabat	TKM.2_1	1	1		0.602299	2012			3	2012
WaW_338	Tuvalu	TUV	UMC	Funafuti	TUV.1_1	1	1				80		9.30931
WaW_339	Uganda	UGA	LIC	Kampala	UGA.16.1_1	2	1		1.18872	2014	65	2014	1.5984	2014			0	2014	0	2014	0	2014	100	2014
WaW_340	Ukraine	UKR	LMC	Kiev	UKR.11_1	1	1	Data added to regional level (Lv 1) despite default being level 2 as better matched with the city (Kiev is an independent city at the regional level)	1.02437	2016			7	2016			0	2016	0	2016	24.5726	2016	0	2016
WaW_341	Ukraine	UKR	LMC	Pavlograd	UKR.5.17_1	2	1		2.1093	2012	100	2012	12.5874	2012
WaW_342	United Arab Emirates	ARE	HIC	Abu Dhabi	ARE.1_1	1	2	Population of data is less than GIS	2.47303	2015	100	2015	19	2015			9	2015	20	2015	0	2015	12.6761	2015
WaW_343	United Arab Emirates	ARE	HIC	Dubai	ARE.3_1	1	2	Population of data is less than GIS	3.05149	2011	100	2011	24.247	2011			0	2011	25	2011	0	2011	100	2011
WaW_344	United Kingdom	GBR	HIC	London	GBR.1.36_1	2	1	The data for london is given at level 2 therefore added to this level.	1.20562	2012	99	2012	6	2012			0	2012	30	2012	46.338	2012	100	2012
WaW_345	United Kingdom	GBR	HIC	Bristol	GBR.1.12.1_1	3	1		1.01223	2015	100	2015	11.1111	2015			25.3	2015	45.03	2015	0	2015	100	2015
WaW_346	United States	USA	HIC	Washington Dc	USA.9.1_1	2	1	Also called District of Columbia	1.89471	2016			0	2016			33	2016	11	2016	0	2016	100	2016
WaW_347	United States	USA	HIC	Ann Arbor	USA.23.85_1	2	1	Added to the Level 2 'Washtenaw' county	1.79169	2012									31	2012
WaW_348	United States	USA	HIC	Seattle	USA.48.17_1	2	2	Also called 'King' in Washington State. Data population is significantly less than GIS population as GIS vector covers larger area	3.12834	2015	100	2015	11.523	2015			0	2015	58.04	2015	0	2015	100	2015
WaW_349	Uruguay	URY	HIC	Montevideo	URY.10_1	1	1		1.00068	2012	100	2012	15.8716	2012			0	2012	29	2012	0	2012	100	2012
WaW_351	Uzbekistan	UZB	LMC	Tashkent	UZB.13.1_1	2	2	Population data is much bigger than GIS data. This appears to be due to the GIS population raster not aligning correctly with the boundary of the city.	0.608558	2012			0	2012
WaW_352	Vanuatu	VUT	LMC	Port Vila	VUT.4_1	1	1	Data better matches level 2 but added at level 1 as more likely waste is managed at an iland level	1.67971	2012	60	2012	7.9	2012
WaW_353	Venezuela	VEN	UMC	Caracas	VEN.11.1_1	2	2	Also called 'Libertador' in 'Distrito Capital'. Data population is greater than GIS population but good match in area	1.52101	2010	100	2010	0	2010			0	2010	0.9	2010	0	2010	100	2010
WaW_354	Vietnam	VNM	LMC	Hanoi	VNM.27_1	1	2	Data population much smaller than GIS population due to GIS vector covering area larger than just the city.	1.8049	2014	92	2014	8.61723	2014			2.44051	2014					84.264	2014
WaW_355	Vietnam	VNM	LMC	Ho Chi Minh City	VNM.25_1	1	1		0.891192	2014	97	2014	15.8259	2014			15	2014	0	2014	0	2014	100	2014
WaW_357	Yemen	YEM	LIC	Sanaa	YEM.9_1	1	1	The municipality of the Capital Sana'a is called Amanat Al Asimah	0.857143	2016	70	2016	10	2016			0	2016	0	2016	0	2016	100	2016
WaW_358	Zambia	ZMB	LMC	Lusaka	ZMB.5.4_1	2	1		0.844709	2011	45	2011	7	2011			0	2011	0	2011	0	2011	27.6596	2011
WaW_359	Zambia	ZMB	LMC	Ndola	ZMB.2.10_1	2	1		0.52	2012			8.33083	2012
WaW_360	Zimbabwe	ZWE	LIC	Harare	ZWE.2.1_1	2	2	Data population lower than GIS but area matches well with the city boundaries	0.721649	2000	97	2000	18.1745	2000
WaW_361	Zimbabwe	ZWE	LIC	Gweru	ZWE.10.4_1	2	2	Data population lower than GIS due to GIS vector coverin area larger than the city boundaries	0.664176	2014	99	2014	10.2	2014
WaW_362	Zimbabwe	ZWE	LIC	Chinhoyi	ZWE.6.5_1	2	2	Within Makonde District. Data population lower than GIS due to GIS vector coverin area larger than the city boundaries	0.712329	2012	50	2012	8.6	2012
WaW_363	Zimbabwe	ZWE	LIC	Norton	ZWE.6.1_1	2	2	Within Chugutu District. Data population lower than GIS due to GIS vector coverin area larger than the city boundaries	0.657534	2012			9.1	2012
WaW_364	Zimbabwe	ZWE	LIC	Kariba	ZWE.6.4_1	2	2	Data population lower than GIS due to GIS vector coverin area larger than the city boundaries	0.767123	2012			11	2012
WaW_365	Zimbabwe	ZWE	LIC	Kadoma City	ZWE.6.3_1	2	3	Population not listed to cross check, but believed to be allocated correctly					7
WaW_367	Zimbabwe	ZWE	LIC	Masvingo City	ZWE.7.5_1	2	3	Population not listed to cross check, but believed to be allocated correctly					40
WaW_368	Zimbabwe	ZWE	LIC	Sakubva	ZWE.3.5_1	2	3	Within Mutare City and District. Population not listed to cross check, but believed to be allocated correctly.					23
UNSD_001	Algeria	DZA	UMC	Adrar	DZA.1_1	1	1	Combined pops of level 2 administrative constitiuents are roughly 550K in 2020 which is a pluasible match for the 510k stated in w2017 here	0.499597	2017	12	2015					1.09091	2015	0	2015	0	2015	43.9024	2015
UNSD_002	Algeria	DZA	UMC	Djelfa	DZA.16_1	1	1	Pop is close - looks like L1	0.752511	2017	100	2017					1	2015	0	2015	0	2015	43.9024	2015
UNSD_003	Algeria	DZA	UMC	Algiers	DZA.4_1	1	1	Although 2020 pop. = 4.35 million, this still seems a plausible fit as the census in 2007 said 3.4 million https://web.archive.org/web/20070930225838/http://www.world-gazetteer.com/wg.php?x=&men=gadm&lng=en&dat=32&geo=-66&srt=npan&col=aohdq	0.940392	2017	100	2017					1	2015	0	2015	0	2015	43.9024	2015
UNSD_004	Algeria	DZA	UMC	Wahran (Oran)	DZA.32_1	1	1	Pop is close - looks like L1	0.854854	2017	70	2015					1	2015	0	2015	0	2015	43.9103	2015
UNSD_005	Algeria	DZA	UMC	Qacentina (Constantine)	DZA.15_1	1	1	Pop in 2020 is 1.25million - close enough	0.801755	2017	80	2015					1	2015	0	2015	0	2015	44.0758	2015
UNSD_006	Argentina	ARG	UMC	La Matanza	ARG.1.62_1	2	1	Pop is 2.415 million in 2020 - plausible increase from 2010			91.9	2010
UNSD_007	Argentina	ARG	UMC	Córdoba	ARG.6_1	1	1	Pop is 3.6 million in 2020 - most plasible as city alone is only 1.3			93	2010
UNSD_008	Argentina	ARG	UMC	Buenos Aires	ARG.5_1	1	1	Must be the Ciudad de Buenos Aires which is 3 million inj 2020 - a plausible increase			97.7	2010
UNSD_009	Armenia	ARM	UMC	Gyumri	ARM.8_1	1	2	no area with tbis name so this is the larger region containing it (no smaller levels). 220k pop likely due to the larger area	0.257607	2019	100	2019					0	2019	0	2019	0	2019	100	2019
UNSD_010	Armenia	ARM	HIC	Vanadzor	ARM.7_1	1	2	larger area that contains vandazor but is wider with pop of 191k	0.161989	2019	100	2019					0	2019	0	2019	0	2019	100	2019
UNSD_011	Armenia	ARM	HIC	Yerevan	ARM.4_1	1	1	2020 pop is 998K on the GIS - so plausibly the same place	0.818692	2019	100	2019					0	2019	0	2019	0	2019	100	2019
UNSD_012	Azerbaijan	AZE	UMC	Baku	AZE.1.2_1	2	1	Pop is very plausibly similar to city with same name									6.27581	2019	0	2019	44.7564	2019	42.1585	2019
UNSD_013	Azerbaijan	AZE	UMC	Ganja	AZE.4.4_1	2	1	GIS pop is a bit low at 306K in 2020 - but still looks like a good fit									0	2017	0	2017	0	2017	0	2017
UNSD_014	Azerbaijan	AZE	UMC	Sumgaitww.	AZE.1.3_1	2	1	Again GIS pop is a bit low at 330K in 2020 - butooks like a good fit as above									0	2017	0	2017	0	2017	0	2017
UNSD_015	Belarus	BLR	UMC	Minsk	BLR.5.11_1	2	1	GIS pop is v close (2.15) in 2020 - the full level 1 area is 0.5 million greater	1.06103	2019	100	2019					0	2019	26.0026	2019	0	2019	100	2019
UNSD_016	Bhutan	BTN	LMC	Thimphu	BTN.14_1	1	3	130k on GIS, not sure on this one because the area seems to cover the town but cantr see reason for the large difference in pop	2.3893	2017	80	2019					10	2017	0	2017	0	2017	0	2017
UNSD_018	Bosnia and Herzegovina	BIH	UMC	Zenica	BIH.2.10.10_1	3	1	GIS pop is 107k in 2020 (118K on nthe map - is plausible	0.692247	2009	85	2009					4.0293	2009	0	2009	0	2009	100	2009
UNSD_019	Bosnia and Herzegovina	BIH	UMC	Sarajevo	BIH.2.6_1	2	1	GIS pop in 2020 is 397k - a bit less than reported here fopr 2009									0	2015	0	2015	0	2015	100	2015
UNSD_020	Botswana	BWA	UMC	Gaborone	BWA.4_1	1	2	GIS pop is circa 60K and surrounding polygons can't be obviously summed to make up the 264K - suspect a larger metropplitan area exists not seen on the GIS dataset	0.807118	2017	100	2017					0	2017	0	2017	0	2017	0	2017
UNSD_021	Botswana	BWA	UMC	Francistown	BWA.3_1	1	1	near enough for Jazz	2.15372	2017	100	2017					0	2017	0	2017	0	2017	0	2017
UNSD_022	Brazil	BRA	UMC	Brasília	BRA.7.1_1	2	1	familiar with these - they look good	1.60222	2014	99	2015					4.21778	2015	0	2015	0	2015	100	2015
UNSD_023	Brazil	BRA	UMC	Salvador	BRA.5.336_1	2	1	familiar with these - they look good	0.914177	2012	96.7	2015					0.0104426	2009	0	2012	0.00224478	2012	0	2012
UNSD_024	Brazil	BRA	UMC	São Paulo	BRA.25.564_1	2	1	familiar with these - they look good	1.23042	2014	100	2015					0.0543053	2014
UNSD_025	Brazil	BRA	UMC	Rio de Janeiro	BRA.19.67_1	2	1	familiar with these - they look good	1.41133	2014	100	2015					0.0552967	2015	0.0913465	2015	0	2015	0	2015
UNSD_026	Brazil	BRA	UMC	Porto Alegre	BRA.21.305_1	2	1	familiar with these - they look good	1.11897	2014	100	2015					0.267003	2015	0	2015	0	2015	0	2015
UNSD_027	Burkina Faso	BFA	LIC	Ouagadougou	BFA.7.1_1	2	2	Data matches Lv 2 & 3 reasonably well, perhaps slightly better match at lv3 but believed Lv2 is more likely to represent the level at which waste is managed so chosen instead			81	2014
UNSD_028	Burundi	BDI	LIC	Bujumbura	BDI.2_1	1	3	Bujumbura is a port city, two parts main city is bujumbura marine surrounded by bujumbura rural. Marine has pop of 890k. Could be plausible increase given the longer time frame. Google says 374k pop 2021 though so seems a bit confusing. Other data says 412k									0	2017	0	2017	0	2017	0	2017
UNSD_029	Cape Verde	CPV	LMC	São Vicente	CPV.20_1	1	1	GIS says 81K in 2020 - near enough for Jazz	1.27114	2015	100	2015					0	2015	0	2015	0	2015	0	2015
UNSD_030	Cape Verde	CPV	LMC	Sal	CPV.11_1	1	2	22k pop on GIS but is the correct island	0.983899	2015	99.8	2015					0	2015	0	2015	0	2015	100	2015
UNSD_031	Cape Verde	CPV	LMC	Praia	CPV.7_1	1	1		0.734456	2019	100	2019					0	2015	0	2015	0	2015
UNSD_032	Cameroon	CMR	LMC	Douala	CMR.5.4_1	2	1	pop of 3.4 million GIS seems the best cover of the area			58.33	2009					0	2009	0	2009	0	2009	98.3639	2009
UNSD_033	Central African Republic	CAF	LIC	Bangui	CAF.2.1_1	2	3	only covers a small part of the city so this has caused GIS to be 277k pop much lower. Level one and two are the same so use 2 as default	0.327789	2009	32	2009
UNSD_034	Chad	TCD	LIC	N'Djamena	TCD.22_1	1	2	2020 pop is 1.4 million - on the GIS - is a steep but plausible increase in a decade	0.739726	2009	45	2009					0	2009	0	2009	0	2009	0	2009
UNSD_035	China	CHN	UMC	Shanghai	CHN.24.1_1	2	2	GIS says 32 mill pop google says 26mill, GIS looks like a slightly larger area, but covers the whole of shanghai									5.7021	2019	0	2019	65.6275	2019	0	2019
UNSD_036	China	CHN	UMC	Chongqing	CHN.3.1_1	2	2	Population best matches with Lv 2 but GADM boundary much bigger than city									0.714523	2019	0	2019	50.5816	2019	0	2019
UNSD_037	China	CHN	UMC	Beijing (Peking)	CHN.2.1_1	2	2	28.5mill pop GIS, bit of a big gap but seems to be in the right place maybe boundry a bit wide									16.8117	2019	0	2019	48.9419	2019	0	2019
UNSD_038	Hong Kong	HKG	HIC	Hong Kong	HKG	0	1	Controversially, country level 0 is close (7.121 million in 2020)	2.13115	2014	100	2015					0	2015	35.4119	2015	0	2015	0	2015
UNSD_039	Macao	MAC	HIC	Macao	MAC	0	1	Controversially, country level 0 is close (600K in 2020)	2.04957	2014	100	2015							0.597725	2015	77.1683	2015	100	2017
UNSD_040	Costa Rica	CRI	UMC	San José	CRI.7.15_1	2	3	199k on GIS. GIS area seems to cover only part of san jose but is more representative than the level 1.	1.08035	2008	100	2008					0	2007	0	2007	0	2007	100	2007
UNSD_041	Croatia	HRV	HIC	Rijeka	HRV.13.34_1	2	1	107k on GIS 2020 seems okay as a change and is in the right place	0.590246	2012	100	2012					0	2012	23.627	2012	0	2012	100	2012
UNSD_042	Croatia	HRV	HIC	Split	HRV.16.43_1	2	1	has 157K on GIS in 2020 which is pl;ausible	0.894218	2012	100	2012					0	2012	1.30846	2012	0	2012	100	2012
UNSD_043	Croatia	HRV	HIC	Zagreb	HRV.4.7_1	2	1	has 794 in 202 which is a plausible increase	1.02406	2012	100	2012					6.07972	2012	2.33158	2012	0	2012	100	2012
UNSD_044	Cuba	CUB	UMC	Camagüey	CUB.1.1_1	2	1	has 323K in 2020 which is a plausible increase	1.92434	2017	100	2017					0.976744	2017	3.86047	2017	0	2017	100	2017
UNSD_045	Cuba	CUB	UMC	Habana	CUB.4_1	1	1	GIS nearly 2 mill for Cuidad de la Habana (province). Note: La Habana (bordering province) 377k so this Habana could be an addition of both but not certain so assume cuidad de la Habana as more than 90% of the popualtion	2.38676	2017	100	2017					0	2017	0	2017	0	2017	100	2017
UNSD_046	Dominican Republic	DOM	UMC	Pedro Brand	DOM.31.4_1	2	1	GIS says 98K nearly 50% greater , however dat is older- this a suburb of a big city so potential inaccuracy in GIS data distribution	0.49202	2010	72.77	2010					0	2015	0	2015	0	2015	100	2015
UNSD_047	Dominican Republic	DOM	UMC	Los Alcarrizos	DOM.31.3_1	2	1	Matches perfectly with the area shown by google when searched for	0.609798	2010	82	2010					0	2015	0	2015	0	2015	100	2015
UNSD_048	Dominican Republic	DOM	UMC	Santo Domingo Oeste	DOM.31.7_1	2	2	GIS population slightly higher but possible	0.983376	2010	91.16	2010					0	2015	0	2015	0	2015	100	2015
UNSD_049	Dominican Republic	DOM	UMC	Santo Domingo Norte	DOM.31.6_1	2	2	GIS is 887k seems a large increase could be due to it being the suburb of a big city	0.67774	2010	76.91	2010					0	2015	0	2015	0	2015	100	2015
UNSD_050	Dominican Republic	DOM	UMC	Santiago De Los Caballeros	DOM.30.6_1	2	2	GIS is 803k looks as though the boundry spreads beyond the border of the main city may be thee reason for this increase			87.34	2010
UNSD_051	Dominican Republic	DOM	UMC	San Pedro De Macoris	DOM.27.6_1	2	1	GIS is 277k k seems a large increase but the boundry does spread a lot wider than the central area			86.96	2010
UNSD_052	Dominican Republic	DOM	UMC	Santo Domingo Este	DOM.31.5_1	2	1	1.17 mill on GIS seems plausible	1.09189	2010	82.15	2010					0	2015	0	2015	0	2015	100	2015
UNSD_053	Dominican Republic	DOM	UMC	Distrito Nacional (Capital de la República)	DOM.5.1_1	2	1		2.29717	2010	92	2010					0	2015	0	2015	0	2015	100	2015
UNSD_054	Ecuador	ECU	UMC	Quito	ECU.19.6_1	2	1	Slightly better match at Lv3 but Lv2 more likely to represent level at which waste is managed so chosen here instead	1.20583	2017	95.8056	2017							0.857507	2012
UNSD_055	Ecuador	ECU	UMC	Guayaquil	ECU.10.11_1	2	1	Reasonable population match	1.3206	2017	96.3408	2017
UNSD_056	Ecuador	ECU	UMC	Cuenca	ECU.1.3_1	2	1	Slightly better match at Lv3 but Lv2 more likely to represent level at which waste is managed so chosen here instead	0.827862	2017	96.7746	2017							0.496976	2012
UNSD_057	Gambia	GMB	LIC	Banjul	GMB.1.2_1	2	2	28k on GIS in 2020 since the sata set is from 2009 this may be plausble. Also the L1 city is made of 2 districts (banjul and Kanifing), perhaps the boundry could have changed/ large areas of the land seem uninhabited/flood prone									0	2009	0	2009	0	2009	0	2009
UNSD_058	Georgia	GEO	LMC	Kutaisi	GEO.4.5_1	2	3	92k on GIS in 2020 this seems a large reduction. Looks as though the area does not cover the majority of the city and quite dense populations on the outer boundry of the area, need to check			95	2007
UNSD_059	Georgia	GEO	LMC	Batumi	GEO.2.1_1	2	1	198k GIS seems plausible increase	1.28951	2017	98.7	2017					0	2017	0	2017	0	2017	100	2017
UNSD_060	Georgia	GEO	LMC	Tbilisi	GEO.12.1_1	2	1	1.05 mill GIS within 10% decrease so seems plausible	0.950746	2017	100	2017					0	2017	0	2017	0	2017	100	2017
UNSD_061	Ghana	GHA	LMC	Tamale	GHA.6.13_1	2	2	409k in GIS this is a lot higher, the area on map seems to cover much more than the city itself.	0.5	2017	70	2017					3.33468	2016	0	2017	0	2017	100	2017
UNSD_062	Ghana	GHA	LMC	Kumasi	GHA.1.16_1	2	2	3.36mill pop on GIS this is the right area but the boundry seems to include a lot of the surrounding areas of the city that are densly populated perhaps the 2mill is only for the cental area??	0.75	2017	85	2017					0	2017	0	2017	0	2017	85	2017
UNSD_063	Ghana	GHA	LMC	Accr	GHA.5.1_1	2	2	Pressume this is Accra not Accr. 3.15 mill in 2020 which seems a lot higher. Probably includes more than just accrra city but would be hard to determine which level 3s as would be a combination	0.7	2017	80	2017					8.27049	2016	0	2017	0	2017	0	2017
UNSD_064	Guatemala	GTM	LMC	Escuintla	GTM.6.1_1	2	1	176k seems a plausible increase.			50	2012					0	2012	0	2012	0	2012	50	2012
UNSD_065	Guatemala	GTM	LMC	Cobán	GTM.1.3_1	2	3	312k on GIS much much smaller 2018 census says around 200k pop. Coban is in level 1 area Alta Verapaz with 1.46mill pop on GIS could be a combination of this and another area surrounding coban ? Have put the unique ID as the level 2 because this covers the area of ther city best			19.51	2012					0	2012	0	2012	0	2012	83.3333	2012
UNSD_066	Guatemala	GTM	LMC	Villa Nueva	GTM.7.16_1	2	3	629k on GIS 2020, this was 2009 but still seems a very large increase. Area is surrounded by lots of smaller districts and seems to be on the edge of guatemala city itself. Perhaps some boundries have chanaged?			85.4	2006
UNSD_067	Guatemala	GTM	LMC	Mixco	GTM.7.5_1	2	1	507k on GIS 2020 seems a reasonable increase			82.2	2006
UNSD_068	Guatemala	GTM	LMC	Huehuetenango	GTM.8.10_1	2	2	GIS population smaller but covers the city			35	2009					0	2009	0	2009	0	2009	100	2009
UNSD_069	Guatemala	GTM	LMC	Quetzaltenango	GTM.13.16_1	2	1		1.19504	2012	95	2012					0	2012	0	2012	0	2012	0	2012
UNSD_070	Guatemala	GTM	LMC	Guatemala	GTM.7_1	1	3	City split into many disticts in lv2 but encompasses much larger area in lv1. Level 1 thought to be closest match			85	2006
UNSD_071	Guinea	GIN	LIC	Conakry	GIN.2.1_1	2	3	the GIS says 2020 pop is 1.9 mill. It looks as though there is a very dense population around the north side of the area so UN boundry could be different. Also the level 1 and level 2 are the same ( level 1 is the region, level 2 is the prefecture ) level 2 is default so this is used	0.241758	2007	76	2007					0	2007	0	2007	0	2007	0	2007
UNSD_072	Guyana	GUY	LMC	Georgetown	GUY.3_1	1	2	Chose level 1 as most likely level at which waste is managed			95	2009					0	2009	0	2009	0	2009	100	2009
UNSD_073	Iran	IRN	UMC	Tabriz	IRN.5.12_1	2	2	1.3 mill 2020 pop in GIS. The boundry seems to miss the east side of the city which explains the decrease	0.720715	2017	100	2017					0	2017			0	2017
UNSD_074	Iran	IRN	UMC	Tehran	IRN.28.8_1	2	1	Tehran is level 1 and has population of nearly 12 mill in 2020 (GIS). I think it is more likely that this is refering to Theran (central Terhan level 2) which has 2020 pop of 7.2 mill on GIS. Previous data feom waste sources calcuated pop of 8.4 mill also.	3.04212	2017	90	2017					4.55063	2017
UNSD_075	Iran	IRN	UMC	Mashhad	IRN.24.9_1	2	1	3.5 mill pop in 2020 on GIS seems plausible	0.788056	2017	100	2017					13.4441	2017	0	2017	0	2017	100	2017
UNSD_076	Iran	IRN	UMC	Esfahan	IRN.6.16_1	2	2	Esfahan L1 is pop 5.6 mill on GIS this looks like the entire province. The county of tiran and karvan has pop of 2.5 mill on GIS and this covers a lot of central Esfahan.	0.63337	2017	100	2017					30.8824	2017	6.72269	2017	0	2017	60.1594	2017
UNSD_077	Iraq	IRQ	UMC	Mosul	IRQ.16.6_1	2	2	2.6 mill pop on GIS boundry seems to cut through city centre a little so may be the reason for the under eastimate	1.14674	2019	53.3	2019
UNSD_078	Iraq	IRQ	UMC	Baghdad	IRQ.10_1	2	2	GIS has population as 5 mill seems like there are some very densly populated areas on the outskirts of the city not within this boundry. Previous data from waste sources estimates 7 mill pop.	1.23688	2019	81.5	2019
UNSD_079	Israel	ISR	HIC	Jerusalem	ISR.6_1	1	2	GIS estimates 1.2 mill pop boundry stretches much further than that of the main city- could explain the increase also 2008 is a much larger gap to 2020 than others									0	2009	4.99894	2009	0	2009	100	2009
UNSD_080	Israel	ISR	HIC	Tel Aviv-Yafo	ISR.7_1	1	3	GIS is 1.5 mil pop and previous data from waste sources 3.3 mill. Internet says pop of 435k in 2015. the GIS does include a slightly larger area than google maps but this is such a big change it is still confusing									0	2009	10.6205	2009	0	2009	100	2009
UNSD_081	Jordan	JOR	UMC	Zarqa	JOR.12_1	1	2	on GIS pop 893k slightly too large a jump but likely explained by the boundry of Zarqa being next to the city Amman and dense population spreads between the two									0	2017	0	2017	0	2017	0	2017
UNSD_082	Jordan	JOR	UMC	Irbid	JOR.5_1	1	2	1.4 mill on GIS could possibly include Ajlun which borders the area and has pop n193k but not sure									0	2017	0	2017	0	2017	0	2017
UNSD_083	Jordan	JOR	UMC	Amman	JOR.2_1	1	2	2.5 mill pop on GIS 2.4 mill on data from waste sources but 4,5 mill in 2016 cencus seems the dense population spreads further than the GIS boundry but this is quite a large change but seems to cover the correct place- best match									0	2017	0	2017	0	2017	0	2017
UNSD_084	Kazakhstan	KAZ	UMC	Astana	KAZ.2.14_1	2	1	As of 2019, Astana is now known as Nur-sultan. Previously it was also known as Akmola which is now the name of the region it is in. this can also be callled Aqmola and this is the GIS location name for the level 1. Nur-sultan is in the level 2 area Tselinogradskiy, which has 2020 GIS pop of 1.3 mill which is a plausible increase	0.764477	2019	100	2019					70.8212	2018	16.4096	2019	0	2019	11.4815	2019
UNSD_085	Kazakhstan	KAZ	UMC	Almaty	KAZ.1.3_1	2	1	1.6 mill pop on GIS boundry cuts out a small part of the city plausible population	0.711758	2019	100	2019					3.74947	2018	10.2062	2019	0	2019	0	2019
UNSD_086	Kenya	KEN	LMC	Nairobi	KEN.30_1	1	1	4.9 mill pop on GIS plausible increase	0.499997	2017	44	2012					0	2017	0	2017	0	2017	0	2017
UNSD_087	Kyrgyzstan	KGZ	LMC	Bishkek	KGZ.2_1	1 or 2	1	L1 mand L2 are the same. 988K pop on GIS plausible increase	0.911091	2017	100	2017					0	2017	0	2017	0	2017	100	2017
UNSD_088	Lebanon	LBN	UMC	Tripoli	LBN.7.5_1	2	1	412k pop on GIS seems plausible increase	0.947797	2012	100	2012					0	2012	0	2012	0	2012	100	2012
UNSD_089	Lebanon	LBN	UMC	Beirut	LBN.3.1_1	2	1	863,695on GIS boarderline plausible increase, given the 2012 to 2020 jump, looks to be the correct location	3.03503	2012	100	2012					6	2012	0	2012	0	2012	100	2012
UNSD_090	Lesotho	LSO	LMC	Maseru	LSO.5_1	1	2	452k increase seems very large is a 14 year jump so would expect this to be higher, also the boundry covers a much wider area than Maseru.			30	2012
UNSD_091	Liechtenstein	LIE	HIC	Schaan	LIE.7_1	1	1	6000 pop 2020 GIS, plausible	1.1962	2019	100	2019					33.8406	2019	19.0307	2019	47.1287	2019
UNSD_092	Madagascar	MDG	LIC	Antananarivo	MDG.1.1.7_1	3	1	1mill pop on GIS seems plausible	0.578004	2007	88.4981	2009					8.27702	2007	0	2009	0	2007	0	2009
UNSD_093	Malaysia	MYS	UMC	Kuala Lumpur	MYS.4.1_1	2	3	No pop to check but appears to be same area									0	2019	0	2019	0	2019	0	2019
UNSD_094	Malaysia	MYS	UMC	Johore Bharu	MYS.1.2_1	2	3	No pop to check but appears to be same area									0	2019	0	2019	0	2019	0	2019
UNSD_095	Mauritius	MUS	UMC	Port Louis	MUS.8_1	1	2	pop 109k on GIS slightly large change but likely due to the extended time gap (2012-2020) also GIS area neglects small suburbs on outskirts									0	2012	0	2012	0	2012	0	2012
UNSD_096	Monaco	MCO	HIC	Monaco	MCO	0	2	26k pop in 2020 on GIS is a little bit low but seems the GIS is in the right place. Some very densly populated areas around the edge of the country boundry	2.21632	2017	100	2017					0	2017	10.1152	2017	89.9	2017
UNSD_097	Montenegro	MNE	UMC	Cetinje	MNE.6_1	1	1	15k pop in 2020 on GIS seems plausible	2.23095	2012	89	2012
UNSD_098	Montenegro	MNE	UMC	Podgorica	MNE.16_1	1	1	206k pop in 2020 on GIS seems plausible	1.50933	2012	80	2012					0	2009	0	2009	0	2009	100	2009
UNSD_099	Morocco	MAR	LMC	Marrakech	MAR.8.5_1	2	2	GIS is 1.5 mill pop. This is a bit high but there is a slightly higher time gap than other instances. Boundry spreads quite far north of marrakesh city	0.878382	2014	93	2014					0	2014	0	2014	0	2014	0	2014
UNSD_100	Morocco	MAR	LMC	Casablanca (Dar-El-Beida)	MAR.5.1_1	2	1	GIS says 4.28mill pop in 2020 this is a plausible increase for the time frame	1.16658	2014	100	2015							0	2015
UNSD_101	Morocco	MAR	LMC	Rabat	MAR.11.2_1	2	1	814k on GIS in 2020 seems a plausible increase			100	2014
UNSD_102	Myanmar	MMR	LMC	Yangon	MMR.15.4_1	2	2	GIS population lower than data but good match with city boundaries													1.87135	2017
UNSD_103	Myanmar	MMR	LIC	Mandalay	MMR.8.2.2_1	3	1				80	2007
UNSD_104	Nepal	NPL	LIC	Lalitpur	NPL.1.1.5.27 1	4	1	this pop looks 1000 times too big. Assuming this GIS pop is 296k and therefore a reasonable increase.			81.4772	2012					0	2012	0	2012	0	2012	100	2012
UNSD_105	Nepal	NPL	LIC	Kathmandu	NPL.1.1.3.31 1	4	2	1000 times too big again ?? GIS says 3.7mill in 2020 bit big, other data says 1 mill. GIS is in the right place			92.592	2012					0	2012	0	2012	0	2012	100	2012
UNSD_106	Nepal	NPL	LIC	Biratnagar	NPL.2.1.3.13 1	4	1	1000 times too big again ?? GIS is 226k which is plausible, location correct.			91.8265	2012					0	2012	0	2012	0	2012	0	2012
UNSD_107	Niger	NER	LIC	Zinder	NER.8.4.18_1	3	2	401k on GIS, seems a bit large, could be due to the large time gap, looks as though in the correct location	0.296591	2006	76.6	2007					0.0206058	2006	0	2006	0	2006	100	2006
UNSD_108	Niger	NER	LIC	Niamey	NER.5.1.1_1	3	1	1.2mill 2020 pop seems plausible			60	2019					0.0206058	2006	0	2019	0	2019	100	2006
UNSD_109	Panama	PAN	HIC	Panama (Distrito capital)	PAN.12_1	1	1	GIS says 1.5mill which is a plausible change, seems to be in the correct place	0.952186	2015	91.1	2015					0	2019	0	2019	0	2019	100	2019
UNSD_110	Panama	PAN	UMC	San Miguelito	PAN.12.7_1	2	1	385k on GIS 2020 seems plausible increase	0.891676	2010	98	2010					0	2015	0	2015	0	2015	100	2015
UNSD_111	Paraguay	PRY	LMC	Luque	PRY.9.10_1	2	1	301k pop 2020 on GIS seems a plausible increase			59.1911	2012
UNSD_112	Paraguay	PRY	LMC	San Lorenzo	PRY.9.15_1	2	1	279k pop 2020 on GIS seems plausible increase			73.2393	2012
UNSD_113	Paraguay	PRY	LMC	Capiatá	PRY.9.2_1	2	1	259k pop 2020 on GIS seems plausible increase			40.6622	2012
UNSD_114	Paraguay	PRY	LMC	Ciudad del Este	PRY.2.1_1	2	1	3.15k pop 2020 on GIS seems plausible increase			64.3624	2012
UNSD_115	Paraguay	PRY	UMC	Asunción	PRY.4.1_1	2	1	543k pop 2020 on GIS seems plausible increase			82.3	2017
UNSD_116	Peru	PER	UMC	Callao	PER.7.1_1	2	2	1.3mill pop 2020 seems slightly large increase very dense population around the boundry so the boundry could be slightly different. Level 1 and level 2 are the same- level 2 is default	0.814221	2019	99.6415	2019					0.129078	2019
UNSD_117	Peru	PER	UMC	Arequipa	PER.4.1_1	2	2	Covers the entire city whereas Lv3 breaks it down into regions			88.1163	2019					14.8895	2019
UNSD_118	Peru	PER	UMC	Lima	PER.15.1_1	2	1	10.5mill pop 2020 GIS seems plausible increase	0.911409	2019	89.7207	2019					0.0913141	2019	0.643182	2019	0	2019	100	2019
UNSD_119	Philippines	PHL	LMC	Manila	PHL.47.6_1	2	1	1.5mill pop 2020 GIS is within 25% reduction, bit odd to go down this much but could be due to the very small boundry of manila city	2.99556	2007	95	2007							0	2007
UNSD_120	Qatar	QAT	HIC	Al-Rayyan	QAT.5_1	1	3	No pop to check but appears to be same area			100	2019
UNSD_121	Moldova	MDA	LMC	Beltsy	MDA.2_1	1	2	called Balti also. Pop 96k little bit lower than would be expected, boundry looks to be right though	7.1138	2014	100	2015					0	2019	0	2019	0	2019	100	2019
UNSD_122	Samoa	WSM	LMC	Apia	WSM.9_1	1	2	Level 1 covers entirety of city but is much larger than city boundary also. Believed to be a better macth than Lv2 and more likely the level at which waste is managed			97.8	2015
UNSD_123	Senegal	SEN	LIC	Dakar	SEN.1_1	1	1	Population best matches with level 1									0	2015	0	2015	0	2015	0	2015
UNSD_124	Serbia	SRB	UMC	Nis	SRB.10.5_1	2	1	270k pop GIS 2020 seems plausible increase									0	2012	0	2012	0	2012	0	2012
UNSD_125	Serbia	SRB	UMC	Novi Sad	SRB.5.6_1	2	1	392K POP 2020 seems ok									0	2012	0	2012	0	2012	0	2012
UNSD_126	Serbia	SRB	UMC	Belgrade	SRB.3_1	1	1	1.7mil on GIS seems ok									0	2012	0	2012	0	2012	0	2012
UNSD_127	South Africa	ZAF	UMC	Soweto	ZAF.3.1_1	2 or 3	2	out by factor of 1000?? seems to come under the city of johannesburg boundry (pop 5.8mill GIS). This covers a bit extra than just soweto so is probably the reason for the increase.	1.18065	2017	100	2017					2.58469	2017	7.4818	2017	0	2017
UNSD_128	South Africa	ZAF	UMC	Port Elizabeth	ZAF.1.7_1	2 or 3	3	seems to be no specific ares is likely a sum of numbered level 4s but pop of this area is 1.3mill which is a lot higher than this area so is not the best match.	2.64965	2017	70	2017					0	2017	0	2017	0	2017
UNSD_129	South Africa	ZAF	UMC	Cape Town	ZAF.9.3_1	2 or 3	1	4.7mill GIS seems plausible	0.851324	2017	100	2017					0.616808	2017	8.57764	2017	0	2017	100	2017
UNSD_130	Sri Lanka	LKA	UMC	Moratuwa	LKA.5.9_1	2	1	140k pop GIS reasonable change	0.67366	2007	90	2007					0	2017	0	2017	0	2017	100	2017
UNSD_131	Sri Lanka	LKA	LMC	Dehiwala-Mount Lavinia	LKA.5.2_1	2	1	168k pop Gis reasonable change	3.50278	2016	96	2007					6.23302	2016	0	2016	0	2016	100	2016
UNSD_132	Sri Lanka	LKA	LMC	Colombo	KLKA.5.1_1	2	2	336K Pop GIS quite a lot different seems that the city extends beyond this boundry so could contain parts of other areas	1.29701	2017	83.5443	2016					0	2016	0	2016	0	2016	0	2016
UNSD_136	Suriname	SUR	UMC	Paramaribo	SUR.7_1	1	2	230k pop GIS . Slightly lower than wanted but likely due to densly populated areas surrounding the boundry			44.48	2012
UNSD_137	Togo	TGO	LIC	Lomé	TGO.3.1_1	2	3	No pop to check but appears to be same area			70	2012
UNSD_138	Uganda	UGA	LIC	Kampala	UGA.16.1_1	2	1	1.7MILL GIS reasonable difference.	0.9	2017	92.0995	2017
UNSD_139	Ukraine	UKR	LMC	Kiev	UKR.11_1	1	1	I think this is kiev city 2.9mill pop so similar	1.3269	2019	100	2019							0	2019	13.8441	2019
UNSD_140	United Arab Emirates	ARE	HIC	Dubai	ARE.3_1	1	2	no pop but boundry covers the area well but also includes the greater dubhi area and no level two covering the entire city			100	2015					0	2017	24.5806	2017	0	2017	0	2017
UNSD_141	United Arab Emirates	ARE	HIC	Al-Sharjah	ARE.6_1	1	2	no pop but this is the boundry covering the main city									1.99958	2017	61.0225	2017	0	2017	0	2017
UNSD_142	United Arab Emirates	ARE	HIC	Abu Dhabi	ARE.1.1_1	2	1	no pop but this is the boundry covering the main city			100	2015					10.8492	2017	19.3937	2017	0	2017	0	2017
UNSD_143	Tanzania	TZA	LIC	Songea	TZA.22.5_1	2	2	289k pop GIS bit big of a pop difference but seems to be the correct location and boundry covwers a large area around the city.	1.75101	2014	46.94	2015					14.276	2015	0	2015	0	2015	1.08418	2015
UNSD_144	Tanzania	TZA	LIC	Rukwa	TZA.21.6_1	2	3	Rukwa is the name of the region ( pop 1.3mill GIS). The capital of Rukwa is Sumbawanga (pop 279k on GIS), more likely ??	1.64479	2014	59.2	2015
UNSD_145	Tanzania	TZA	LIC	Moshi	TZA.9.3_1	2	1	227k on GIS seems reasonable	0.709298	2014	85	2015					0	2015	0	2015	0	2015	0	2015
UNSD_146	Tanzania	TZA	LIC	Dodoma	TZA.3.4_1	2	3	No pop to check but appears to be same area									0	2011	0	2011	0	2011	0	2011
UNSD_150	Yemen	YEM	LMC	Ta'izz	YEM.21_1	1	2	Think this is a case of the level 1s being too big and level 2s too small. Will use the level; 1 area as would be hared to choose a level 2 area. Pop much bigger of this area at 3.7mill on GIS	0.833261	2012	91	2013					0	2013	0	2013	0	2013	100	2013
UNSD_151	Yemen	YEM	LMC	Aden	YEM.1_1	1	1	911k pop GIS so probably plausible	0.652632	2013	96	2013					0	2013	0	2013	0	2013	100	2013
UNSD_152	Yemen	YEM	LMC	Sana'a	YEM.19_1	1	2	1.5mill pop GIS 2020. seems a bit big but given the larger date gap and the map looking okay is likely the right place	0.641293	2013	95	2013					0	2013	0	2013	0	2013	100	2013
UNSD_153	Zimbabwe	ZWE	LIC	Rusape	ZWE.3.4_1	2	2	no boundry with this name looks to be in Makoni, 330k pop. Area seems much bigger			97	2015					0	2015	0	2015	0	2015	0	2015
UNSD_154	Zimbabwe	ZWE	LIC	Gwanda	ZWE.9.3_1	2	2	141pop covers much larger area than just gwanda but seems to be the right place	0.26006	2014	100	2015					0	2015	0	2015	0	2015	0	2015
UNSD_155	Zimbabwe	ZWE	LIC	Gokwe	ZWE.10.3_1	2	2	in gokwe south but again very large area 357k pop on GIS same issue as above									0	2015	0	2015	0	2015	0	2015
UNSD_156	Zimbabwe	ZWE	LIC	Chinhoyi	ZWE.6.5_1	2	2	this is in Makonde pop 273k no smaller level to be more precse	0.034115	2014	67.5	2015					0	2015	0	2015	0	2015	0	2015
UNSD_157	Zimbabwe	ZWE	LIC	Bulawayo	ZWE.1.1_1	2	1	630k pop 2020 GIS seems reasonable	0.246149	2014	97.3	2015					0	2015	0	2015	0	2015	0	2015
UNSD_158	Zimbabwe	ZWE	LIC	Bindura	ZWE.4.1_1	2	2	190k pop 2020 GIS, very big jump but quite large area surrounding the town. 2012 census has pop as 46k but boundry a lot smaller	0.275057	2014	87	2015					0	2015	0	2015	0	2015	0	2015
UNSD_159	Zimbabwe	ZWE	LIC	Victoria Falls	ZWE.8.3_1	2	2	found in the hwange district 159k pop 2020 GIS much larger area									0	2015	0	2015	0	2015	0	2015
UNSD_160	Zimbabwe	ZWE	LIC	Norton	ZWE.6.1_1	2	2	Chegutu, 320k pop much larger than Norton, same issue as other ZWE, other sources has pop as 58k	0.265426	2014	95	2015					0	2015	0	2015	0	2015	0	2015
UNSD_161	Zimbabwe	ZWE	LIC	Mutare	ZWE.3.5_1	2	2	491k pop on GIS, very large area covering way more than just the town.									0	2015	0	2015	0	2015	0	2015
UNSD_162	Zimbabwe	ZWE	LIC	Masvingo	ZWE.7.5_1	2	2	329k pop GIS, very large area covering way more than just the town			95	2015					0	2015	0	2015	0	2015	0	2015
UNSD_163	Zimbabwe	ZWE	LIC	Kwekwe	ZWE.10.5_1	2	2	337k pop GIS, very large area covering way more than just the town	1.00017	2014	91	2015					0	2015	0	2015	0	2015	10.5058	2015
UNSD_164	Zimbabwe	ZWE	LIC	Karima	ZWE.6.4_1	2	3	Thinking this is probably Kariba, similar pop on google and data from other waste sources to suggest. GIS says 80k pop but is a much larger area than just the town.	0.0190913	2014	100	2015					0	2015	0	2015	0	2015	0	2015
UNSD_165	Zimbabwe	ZWE	LIC	Kadoma	ZWE.6.3_1	2	2	no pop to compare to but looks to be in the right place but ios a much larger area than the google maps boundry			92	2015					7.83626	2015	0	2015	0	2015	0	2015
UNSD_166	Zimbabwe	ZWE	LIC	Harare	ZWE.2.1_1	2	2	2.3mill pop GIS bit over estimate but looks to be in the right place and boundry includes lots of suburb towns	0.706703	2014	76	2015					1.76843	2015	0	2015	0	2015	0	2015
UNSD_167	Zimbabwe	ZWE	LIC	Gweru	ZWE.10.4_1	2	2	270k pop GIS 2020, v large area covering more than just the town. Other source 158k pop so seems right	0.144969	2014	98	2015					5.76037	2015	0	2015	0	2015	0	2015
SIPSN_01	Indonesia	IDN	LMC	Kota Pasuruan	IDN.11.16_1	2	1		0.637425	2020	67.3814	2020					0.0111932	2020	0.419699	2020			100	2020
SIPSN_02	Indonesia	IDN	LMC	Kota Yogyakarta	IDN.33.3_1	2	1		0.965747	2020	69.2461	2020					0.356126	2020	0.00312536	2020			0	2020
SIPSN_03	Indonesia	IDN	LMC	Cimahi	IDN.9.8_1	2	1		0.480958	2020	84.4337	2020					0.602837	2020	0.23841	2020			0	2020
SIPSN_04	Indonesia	IDN	LMC	Kota Medan	IDN.32.9_1	2	1		0.7	2020	50.7615	2020					28.9142	2020	0.0138677	2020			0	2020
SIPSN_05	Indonesia	IDN	LMC	Padang	IDN.30.10_1	2	1		0.732212	2020	67.6072	2020					0.222222	2020	0	2020			0	2020
SIPSN_06	Indonesia	IDN	LMC	Palopo	IDN.26.14_1	2	1		0.57595	2020	46.9036	2020					1.76388	2020	4.42975	2020			100	2020
SIPSN_07	Indonesia	IDN	LMC	Jambi	IDN.8.3_1	2	1		0.70551	2020	74.165	2020					1.53033	2020	0.654197	2020			0	2020
SIPSN_08	Indonesia	IDN	LMC	Banjar Baru	IDN.13.2_1	2	1		0.580498	2020	78.5991	2020					2.0665	2020	0.30042	2020			100	2020
SIPSN_09	Indonesia	IDN	LMC	Bitung	IDN.29.1_1	2	1		0.7	2020	44.6356	2020					2.87165	2020	0.0609928	2020			100	2020
SIPSN_10	Indonesia	IDN	LMC	Ambon	IDN.19.1_1	2	1		0.779059	2020	60.2411	2020					0.641769	2020	0.0742474	2020			100	2020
MOHURD_001	China	CHN	UMC	Shahe	CHN.10.10.14_1	3	1	92% similarity score between GHS and MoHURD populations	0.611865	2019
MOHURD_002	China	CHN	UMC	Xincheng	CHN.10.1.19_1	3	2	70% similarity score between GHS and MoHURD populations	0.472411	2019
MOHURD_003	China	CHN	UMC	Chengde	CHN.10.3.1_1	3	2	78% similarity score between GHS and MoHURD populations	0.695013	2019
MOHURD_004	China	CHN	UMC	Cangzhou	CHN.10.2.2_1	3	1	88% similarity score between GHS and MoHURD populations	0.559038	2019
MOHURD_005	China	CHN	UMC	Houma	CHN.25.5.7_1	3	2	60% similarity score between GHS and MoHURD populations	0.470696	2019
MOHURD_006	China	CHN	UMC	Genhe	CHN.19.6.6_1	3	2	75% similarity score between GHS and MoHURD populations	0.600635	2019
MOHURD_007	China	CHN	UMC	Jining	CHN.19.9.3_1	3	2	74% similarity score between GHS and MoHURD populations	0.439849	2019
MOHURD_008	China	CHN	UMC	Jinzhou	CHN.18.4.3_1	3	2	66% similarity score between GHS and MoHURD populations	0.376288	2019
MOHURD_009	China	CHN	UMC	Chaoyang	CHN.18.3.2_1	3	1	90% similarity score between GHS and MoHURD populations	0.455612	2019
MOHURD_010	China	CHN	UMC	Yanji	CHN.17.9.8_1	3	2	64% similarity score between GHS and MoHURD populations	0.403181	2019
MOHURD_011	China	CHN	UMC	Qiqihar	CHN.11.9.9_1	3	2	61% similarity score between GHS and MoHURD populations	0.525524	2019
MOHURD_012	China	CHN	UMC	Suifenhe	CHN.11.8.7_1	3	2	71% similarity score between GHS and MoHURD populations	0.747885	2019
MOHURD_013	China	CHN	UMC	Yixing	CHN.15.9.5_1	3	2	73% similarity score between GHS and MoHURD populations	0.409896	2019
MOHURD_014	China	CHN	UMC	Yuyao	CHN.31.6.7_1	3	2	78% similarity score between GHS and MoHURD populations	0.938064	2019
MOHURD_015	China	CHN	UMC	Cixi	CHN.31.6.1_1	3	1	82% similarity score between GHS and MoHURD populations	0.54963	2019
MOHURD_016	China	CHN	UMC	Wenzhou	CHN.31.10.7_1	3	2	66% similarity score between GHS and MoHURD populations	0.91532	2019
MOHURD_017	China	CHN	UMC	Shengsi	CHN.31.8.4_1	3	2	63% similarity score between GHS and MoHURD populations	0.684758	2019
MOHURD_018	China	CHN	UMC	Taizhou	CHN.31.9.1_1	3	2	67% similarity score between GHS and MoHURD populations	0.778169	2019
MOHURD_019	China	CHN	UMC	Lishui	CHN.31.5.3_1	3	2	76% similarity score between GHS and MoHURD populations	0.514347	2019
MOHURD_020	China	CHN	UMC	Fuqing	CHN.4.1.2_1	3	1	80% similarity score between GHS and MoHURD populations	0.563459	2019
MOHURD_021	China	CHN	UMC	Sanming	CHN.4.7.8_1	3	1	94% similarity score between GHS and MoHURD populations	0.480908	2019
MOHURD_022	China	CHN	UMC	Jinjiang	CHN.4.6.4_1	3	2	79% similarity score between GHS and MoHURD populations	0.812312	2019
MOHURD_023	China	CHN	UMC	Nan'an	CHN.4.6.5_1	3	2	65% similarity score between GHS and MoHURD populations	0.642145	2019
MOHURD_024	China	CHN	UMC	Pingxiang	CHN.16.7.2_1	3	1	83% similarity score between GHS and MoHURD populations	0.506113	2019
MOHURD_025	China	CHN	UMC	Jiaoxian	CHN.23.10.3_1	3	2	62% similarity score between GHS and MoHURD populations	0.548544	2019
MOHURD_026	China	CHN	UMC	Tai an	CHN.23.12.4_1	3	2	62% similarity score between GHS and MoHURD populations	0.436247	2019
MOHURD_027	China	CHN	UMC	Xinwen	CHN.23.12.5_1	3	2	71% similarity score between GHS and MoHURD populations	0.403158	2019
MOHURD_028	China	CHN	UMC	Feicheng	CHN.23.12.2_1	3	2	75% similarity score between GHS and MoHURD populations	0.390741	2019
MOHURD_029	China	CHN	UMC	Gaoqing	CHN.23.17.1_1	3	2	68% similarity score between GHS and MoHURD populations	0.606076	2019
MOHURD_030	China	CHN	UMC	Xingyang	CHN.12.16.4_1	3	1	86% similarity score between GHS and MoHURD populations	0.475939	2019
MOHURD_031	China	CHN	UMC	Dengfeng	CHN.12.16.1_1	3	2	77% similarity score between GHS and MoHURD populations	0.501355	2019
MOHURD_032	China	CHN	UMC	Huixian	CHN.12.13.4_1	3	2	65% similarity score between GHS and MoHURD populations	0.629924	2019
MOHURD_033	China	CHN	UMC	Puyang	CHN.12.10.3_1	3	1	83% similarity score between GHS and MoHURD populations	0.65517	2019
MOHURD_034	China	CHN	UMC	Jiyuan	CHN.12.4.1_1	3	2	67% similarity score between GHS and MoHURD populations	0.514029	2019
MOHURD_035	China	CHN	UMC	Kaiping	CHN.6.7.4_1	3	2	68% similarity score between GHS and MoHURD populations	0.407701	2019
MOHURD_036	China	CHN	UMC	Heshan	CHN.6.7.2_1	3	1	84% similarity score between GHS and MoHURD populations	0.432409	2019
MOHURD_037	China	CHN	UMC	Sihui	CHN.6.19.6_1	3	2	68% similarity score between GHS and MoHURD populations	0.46948	2019
MOHURD_038	China	CHN	UMC	Shanwei	CHN.6.13.4_1	3	2	61% similarity score between GHS and MoHURD populations	0.496026	2019
MOHURD_039	China	CHN	UMC	Qingyuan	CHN.6.11.5_1	3	2	72% similarity score between GHS and MoHURD populations	0.59196	2019
MOHURD_040	China	CHN	UMC	Guan	CHN.26.16.3_1	3	1	83% similarity score between GHS and MoHURD populations	0.380888	2019
MOHURD_041	China	CHN	UMC	Guanghan	CHN.26.4.2_1	3	2	65% similarity score between GHS and MoHURD populations	0.545552	2019
MOHURD_042	China	CHN	UMC	Shifang	CHN.26.4.4_1	3	2	69% similarity score between GHS and MoHURD populations	0.502483	2019
MOHURD_043	China	CHN	UMC	Zhongshan	CHN.8.4.4_1	3	2	77% similarity score between GHS and MoHURD populations	0.460366	2019
MOHURD_044	China	CHN	UMC	Huayin	CHN.22.6.8_1	3	2	70% similarity score between GHS and MoHURD populations	0.392572	2019
MOHURD_045	China	CHN	UMC	Wuzhong	CHN.20.3.3_1	3	1	85% similarity score between GHS and MoHURD populations	0.39236	2019
MOHURD_046	China	CHN	UMC	Kashgar	CHN.28.9.3_1	3	2	76% similarity score between GHS and MoHURD populations	0.44406	2019
MOHURD_047	China	CHN	UMC	Shihezi	CHN.28.12.1_1	3	2	72% similarity score between GHS and MoHURD populations	0.45192	2019

## Sheet: 03_Age_of_data_analysis
								Short_name:		Waste_gen_rate	Waste_gen_rate_yr	Col_cov	Col_cov_yr	Plastic_MSW	Plastic_MSW_yr	Plastic_rigid	Plastic_rigid_yr	Other_recv	Other_Recv_yr	Form_dry_recy	Form_dry_recy_yr	Incin	Incin_yr	Cont_disp	Cont_disp_yr	Cont_fac	Cont_fac_yr
								ID:		tP1pc		tC1		C0		C0a		tC2ii		tC2i		tC2iii		tC3
								Unit:	TRUE / FALSE	kg·cap-1·d-1	Year	% MSW generation	Year	% MSW generated	Year	% plastic in MSW	Year	% collected MSW	Year	% collected MSW	Year	% collected MSW	Year	% collected MSW for disposal	Year	% MSW generated	Year
Data_ID	Country	ISO3	Income_level	Municipality	UniqueID for matching admin boundary	GADM level of best match	GADM boundary match score	GADM boundary match notes	Data prior to 2006?	Waste generation rate	Waste generation rate year	Collection coverage	Collection coverage year	Plastic in MSW	Plastic in MSW year	Rigid plastic	Rigid Plastic Year	Other recovery	Other recovery year	Formal dry recycling	Formal dry recycling year	Incineration	Incineration year	Controlled disposal	Controlled disposal year	MSW collected and managed in controlled facilities	MSW collected and managed in controlled facilities year
WACT_01	Kenya	KEN	LMC	Nairobi	KEN.30_1	1	1	Population and boundary match well	FALSE	0.7	2019	65.25	2019	9.6	2019	60.1042	2019					0	2019	0	2019	14.66	2019
WACT_02	Seychelles	SYC	HIC	Victoria	SYC	0	2	Population is for entire Seychelles not just Victoria. Assigned to entire Syechelles as unclear at what level WaCT applied.	FALSE	2.34	2019	97.77	2019	11.9	2019	45.4622	2019					0	2019	100	2019	97.77	2019
WACT_03	Kenya	KEN	LMC	Kiambu	KEN.13_1	1	2	Population suggests WaCT applied for Kiambu County, therefore level 1 although this poorly matches the city limits.	FALSE	0.53	2020	51.68	2020	6.77	2020	39.4387	2020					0	2020	0	2020	3	2020
WACT_04	Kenya	KEN	LMC	Mombasa	KEN.28_1	1	1	Population and boundary match well	FALSE	0.59	2020	56.4	2020	8.47	2020	48.4061	2020					0	2020	0	2020	5.15	2020
WACT_05	Bangladesh	BGD	LMC	Khulna	BGD.4.5.6_1	3	3	Data population much less than GIS population, likely due to Khulna being divided into several parts within GADM. Level 2 has much larger population in GIS than dataset. Assumed data applies to central area of Khulna even though populations differ.	FALSE	0.6	2021	62.89	2021	4.98	2021	29.7189	2021					0	2021	0	2021	0.26	2021
WACT_06	Cambodia	KHM	LMC	Kep	KHM.10.1_1	2	1	Level 2 (province) believed to be best match even though data population is less than GIS.	FALSE	1.2	2021	58.15	2021	18.9	2021	48.2011	2021					0	2021	0	2021	0.05	2021
WACT_07	Cambodia	KHM	LMC	Sihanoukville	KHM.13_1	1	2	Population best matches level 1 although this is a poor match to the city boundaries.	FALSE	1.75	2021	89.59	2021	22.65	2021	35.894	2021					0	2021	0	2021	0	2021
WACT_08	Democratic Republic of the Congo	COD	LIC	Bukavu	COD.22.2_1	2	1	Dataset population slightly higher than admin boundary but has the best match to the city boundaries.	FALSE	0.69	2021	7.02	2021	6.37	2021	37.8336	2021					0	2021	0	2021	0.1	2021
WACT_09	Dominican Republic	DOM	UMC	Santo Domingo (East + Boco Chica)	DOM.31.5_1 + DOM.31.1_1	2	2	GIS population is slightly lower than that reported in dataset, likel due to urban agglomerates also being included.	FALSE	1.04	2021	82.78	2021	12.85	2021	45.8366	2021					0	2021	6.66773	2021	5.63	2021
WACT_10	Ethiopia	ETH	LIC	Addis Ababa	ETH.1_1	1 or 2	2	Population in dataset slightly higher than GIS but GADM boundary clearly matches that of the city.	FALSE	0.44	2021	98.19	2021	8.19	2021	49.2063	2021					20.7983	2021	0	2021	23.14	2021
WACT_11	Ethiopia	ETH	LIC	Bahir Dar	ETH.3.3_1	2 or 3	2	Both level 2 and 3 are same. The population matches well but the GADM boundary covers only part of the city boundaries	FALSE	0.56	2021	85.53	2021	11.69	2021	55.6031	2021					0	2021	0	2021	0.37	2021
WACT_12	India	IND	LMC	Mangalore	IND.16.12.3_1	3	2	GIS population is higher than dataset as GADM boundary covers a larger area than the city boundary, but level 3 is the most granular and provides best fit.	FALSE	0.67	2021	89.83	2021	9.24	2021	26.9481	2021					0	2021	0	2021	12.87	2021
WACT_14	Nigeria	NGA	LMC	Lagos	NGA.25_1	1	2	Dataset population is less than GIS population. Lv 1 GADM boundary extends along the coast outside city limits based on Google Maps. Level 2 is a worse fit as breaks city down into several districts.	FALSE	0.79	2021	47.98	2021	31.83	2021	32.6422	2021					0	2021	0	2021	7.82	2021
WACT_15	Pakistan	PAK	LMC	Karachi	PAK.8.2_1	2	2	Population of dataset is higher than GIS population, but reasonably close and seems to be the best level of match	FALSE	0.49	2021	81.17	2021	13.08	2021	22.7064	2021					0	2021	0	2021	0.06	2021
WACT_16	Tanzania	TZA	LMC	Dar es Salaan	TZA.2_1	1	1	Populaiton matches well. GADM boundary slightly larger than city	FALSE	0.84	2021	35.61	2021	4.71	2021	57.5372	2021					0	2021	0	2021	0.97	2021
WACT_17	Tunisia	TUN	LMC	Sousse	TUN.20_1	1	3	No single boundary matches well as city is divided into several GADM polygons. Likely a combination of several of these, Level 1 probably best match	FALSE	1.18	2021	90.2	2021	15.28	2021	49.8691	2021					0	2021	100	2021	90.2	2021
WACT_18	Zimbabwe	ZWE	LMC	Harare	ZWE.2.1_1	1 or 2	2	GIS population larger than dataset populaiton but GADM boundary matches city limits well. Both level 1 and 2 are the same for Harare.	FALSE	0.56	2021	25.39	2021	15.11	2021	48.3786	2021					0	2021	0	2021	1.77	2021
WACT_19	Malaysia	MYS	UMC	Seremban	MYS.7.6_1	2	1	Population matches well as do adminsitrative boudnaries	FALSE	0.88	2021	96.25	2021	15.83	2021	42.1352	2021					0	2021	100	2021	96.25	2021
WACT_20	Thailand	THA	UMC	Chonburi	THA.12_1	1	2	Level 1 best matches population, but GADM boundary also encompasses other cities (e.g. Pattaya City)	FALSE	1.23	2021	98.18	2021	15.07	2021	49.3696	2021					0	2021	22.7854	2021	36.98	2021
WACT_21	Vietnam	VNM	LMC	Tam Ky	VNM.47.15_1	2	1	Good match to population and city limits	FALSE	0.92	2021	93.86	2021	20.51	2021	45.2462	2021					0	2021	0	2021	0	2021
WACT_22	Vietnam	VNM	LMC	Hoi-An	VNM.47.6_1	2	1	Good match to population and city limits	FALSE	0.64	2021	99.23	2021	16.75	2021	31.3433	2021					0	2021	100	2021	97.64	2021
WACT_23	Vietnam	VNM	LMC	Anonymous	VNM.54.2_1	2	2	Dataset population slightly higher but GADM boundary matches city limits well.	FALSE	0.83	2021	97.33	2021	13.67	2021	41.4777	2021					0	2021	100	2021	76.56	2021
WACT_24	Indonesia	IDN	LMC	Anonymous	IDN.9.10_1	2	2	Dataset population less than GIS but GADM boundary matches city limits well.	FALSE	0.48	2021	94.37	2021	17.72	2021	27.5395	2021					0	2021	0	2021	2.49	2021
WACT_25	Indonesia	IDN	LMC	Anonymous	IDN.9.16_1	2	1	Population and boundary match well	FALSE	0.51	2021	88.04	2021	19.14	2021	31.7137	2021					0	2021	0	2021	0.82	2021
WACT_26	Ghana	GHA	LMC	Cape Coast	GHA.3.8_1	2	1	Good match to population and city limits	FALSE	0.73	2021	62.59	2021	20.26	2021	20.3356	2021					0	2021	0	2021	0	2021
WACT_27	Egypt	EGY	LMC	Alexandria	EGY.6_1	1	2	Dataset population slightly more than GIS but is for more recent year (2022 vs 2020) so could have increased a bit.	FALSE	0.93	2022	83.76	2022	15.98	2022	27.1589	2022					0	2022	100	2022	80.8	2022
WACT_28	Egypt	EGY	LMC	Anonymous	EGY.1_1	1	1	Population matches well. Applies to a governate (provincial) region	FALSE	0.7	2022	59.93	2022	10.96	2022	36.3139	2022					0	2022	55.7325	2022	48.07	2022
WACT_29	India	IND	LMC	Thiruvananthapuram	IND.17.12.4_1	3	1	Population matches well as do city boudnaries	FALSE	0.44	2021	68.02	2021	10.73	2021	54.4268	2021					0	2021	0	2021	49.47	2021
WACT_30	Kenya	KEN	LMC	Taita Taveta	KEN.39_1	1	1	Population matches well as do adminsitrative boudnaries	FALSE	0.54	2022	30.06	2022	4.77	2022	61.6352	2022					0	2022	0	2022	1.32	2022
WACT_31	Philippines	PHL	LMC	Cagayan de Oro	PHL.49.5_1	2	1	Population matches well as do city boudnaries	FALSE	0.38	2021	92.3	2021	15.52	2021	34.0851	2021					0	2021	100	2021	91.33	2021
WACT_32	Philippines	PHL	LMC	Legazpi	PHL.5.7_1	2	1	Population matches well, admin boundaries include more rural areas.	FALSE	0.37	2021	61.7	2021	11.77	2021	49.6177	2021					0	2021	100	2021	56.46	2021
WACT_33	Philippines	PHL	LMC	Ormoc	PHL.43.30_1	2	1	Population matches well, admin boundaries include more rural areas.	FALSE	0.31	2021	58.36	2021	19.19	2021	63.1579	2021					0	2021	0	2021	12.5	2021
WACT_34	Senegal	SEN	LMC	Dakar	SEN.1.1_1	2	2	GIS population slightly higher. Some uncertainty on how far along the peninsular the city spreads but Level 2 best matches the population so chosen.	FALSE	0.97	2022	95.22	2022	9.13	2022	39.6495	2022					0	2022	0	2022	1.33	2022
WACT_35	Thailand	THA	UMC	Anonymous	THA.64.3_1	2	3	GIS population much bigger but matches pcity boundaries well	FALSE	1.05	2021	97.97	2021	17.23	2021	41.0911	2021					93.3844	2021	0	2021	93.04	2021
WACT_36	Thailand	THA	UMC	Anonymous	THA.67.12_1	2	2	GIS Population less than dataset.. Unlikely to be level 1 as extends to mainland. Instead taken as level 2 to represent entire island of Koh Samui.	FALSE	1.41	2021	94.46	2021	17.43	2021	44.9225	2021					0	2021	0	2021	25.84	2021
WACT_37	Thailand	THA	UMC	Anonymous	THA.64.7_1	2	3	GIS population much bigger but matches city boundaries well. Level 2 better match than level 3 for population	FALSE	1.28	2021	95.24	2021	16.51	2021	38.0981	2021					0	2021	0	2021	10.6	2021
WACT_38	Thailand	THA	UMC	Anonymous	THA.67.13_1	2	1	Population matches well as do city boudnaries	FALSE	1.22	2021	97.82	2021	24.5	2021	49.3469	2021					0	2021	0	2021	12.29	2021
WACT_39	Uganda	UGA	LIC	Anonymous	UGA.16.1_1 + UGA.57.3_1 + UGA.44.3_1 + UGA.57.1_1 + UGA.57.2_1	2	2	This is believed to be represented by five level 2 GADM boundaries. The population via GIS is slightly higher than that recorded in the dataset.	FALSE	0.97	2021	34.82	2021	8.07	2021	31.1029	2021					0	2021	0	2021	1.96	2021
WABI_001	Australia	AUS	HIC	Adelaide	AUS.8.1_1+AUS.8.67_1+AUS.8.62_1+AUS.8.8_1+AUS.8.41_1+AUS.8.65_1+AUS.8.50_1+AUS.8.11_1+AUS.8.9_1+AUS.8.58_1+AUS.8.54_1+AUS.8.46_1+AUS.8.22_1+AUS.34_1+AUS.8.32_1+AUS.8.45_1	2	2	GIS population smaller than data. This is because the data is believed to represent the wider metropolitan area of Adelaide so joined several polygons	FALSE	1.144	2007	100	2007	5	2007			12.15	2007	41.85	2007	0	2007	100	2007
WABI_002	Greece	GRC	HIC	Athens (GAA)	GRC.3.1_1	1 or 2	1	Added to level 2 as seems best match for population. Level 1 also the same.	FALSE	1.6	2008	100	2008	13	2008			0.04	2008	9.96	2008	0	2008	100	2008
WABI_003	Bahrain	BHR	HIC	Bahrain	BHR	0	1	Good match with 2010 population	FALSE	1.1	2009	100	2009	13.4	2009			0	2009	5	2009	0	2009	100	2009
WABI_004	Mali	MLI	LIC	Bamako	MLI.1.1.1_1	1 or 2 or 3	1	Good match with 2010 population	FALSE	0.700001	2007	57	2007	2	2007			0	2007	0	2007	0	2007	0	2007
WABI_005	India	IND	LMC	Bangalore	IND.16.3.2_1	3	1	Added to Bangalore North LV3 as covers the majority of the city.	FALSE	0.547945	2007	75	2007	11	2007			14	2007	0	2007	0	2007	73	2007
WABI_006	United Kingdom	GBR	HIC	Belfast	GBR.2.3.1_1	2 or 3	1	Reasonable match on population and matches boudnaries well	FALSE	1.87088	2013	100	2013	6	2013			14.315	2013	20.685	2013	0	2013	98	2013
WABI_007	Brazil	BRA	UMC	Belo Horizonte	BRA.13.65_1	2	1	2.5mill pop on GIS seems plausible	FALSE	1.08775	2007	82	2007	11	2007			0	2007	0.609756	2007	0	2007	100	2007
WABI_008	Kyrgyzstan	KGZ	LIC	Bishkek	KGZ.2.1_1	1 or 2	2	Population slightly higher than GIS population	FALSE	0.542073	2010	83	2010	8	2010			0.1875	2010	3.38855	2010	0	2010	0	2010
WABI_009	Peru	PER	UMC	Canete	PER.16.3.14_1	3	1	Reasonable match on population	FALSE	0.663024	2007	78	2007	9	2007			0	2007	1.28205	2007	0	2007	0	2007
WABI_010	Saint Lucia	LCA	UMC	Castries	LCA.3_1	1	1	Good match with 2010 population	FALSE	0.596553	2007	100	2007	26	2007			0	2007	2.5	2007	0	2007	100	2007
WABI_011	Mauritius	MUS	UMC	Curepipe	MUS.7_1	1	3	360k pop bigger due to level 1 being the smallest level but does contain the area	FALSE	0.777264	2009	100	2009	16	2009			0	2009	0	2009	0	2009	100	2009
WABI_012	Tanzania	TZA	LIC	Dar-es-Salaam	TZA.2_1	1	1	5.6mil pop in 2015 seems plausible	FALSE	0.951406	2013	40	2013	16	2013			0	2013	0	2013	0	2013	0	2013
WABI_013	India	IND	LMC	Delhi	IND.25.1.1_1	1 or 2 or 3	1	16mil 2010 pop seems plausible	FALSE	0.500072	2007	75	2007	1	2007			6	2007	0	2007	0	2007	10	2007
WABI_014	Bangladesh	BGD	LIC	Dhaka	BGD.3.1_1	2	2	Waste management is split differently for urban and rural areas. The GIS layer does not account for this difference. A regional level is chosen to represent Dhaka (level 2) even though this is bigger than Dhaka it is deemed the best fit.	FALSE	0.543282	2007	55	2007	4	2007			1	2007	0	2007	0	2007	55	2007
WABI_015	Nepal	NPL	LIC	Ghorahi	NPL.4.3.1.39_1	4	2	Admin Boundary actually called TribhuwanNagarN.P. This data has higher population than in GIS measurement but believed to be same place.Wikipedia says Ghorahi has won award for cleanest landfill.	FALSE	0.32491	2007	83	2007	5	2007			0	2007	2.40964	2007	0	2007	88	2007
WABI_016	Mexico	MEX	UMC	Guadalajara	MEX.14.43_1	2	2	GIS has double the population of this, but boundary matches well	FALSE	1.17461	2010	95	2010	10	2010			0	2010	0	2010	0	2010	100	2010
WABI_017	Indonesia	IDN	LMC	Jakarta	IDN.7_1	1	1	Reasonable match on population in 2010	FALSE	0.691981	2010	95	2010	14.27	2010			5	2010	0	2010	0	2010	84	2010
WABI_018	Uganda	UGA	LIC	Kampala	UGA.16.1_1+UGA.57.3_1+UGA.57.1_1+UGA.44.3_1	2	2	Data for Greater Kampala. Has bigger population than GIS suggest but boundary matches well	FALSE	0.5	2010	50	2010	7.8	2010			0	2010	0	2010	0	2010	55	2010
WABI_019	China	CHN	LMC	Kunming	CHN.30.7.6_1	3	1	4mill pop in 2010 on GIS reasonable change	FALSE	0.73392	2007	100	2007	7	2007			0	2007	0	2007	0	2007	100	2007
WABI_020	Pakistan	PAK	LMC	Lahore	PAK.7.5.2_1	3	1	Population matches well as does boundary	FALSE	0.649752	2011	77	2011	12.25	2011			8	2011	0	2011	0	2011	18	2011
WABI_021	Zambia	ZMB	LIC	Lusaka	ZMB.5.4_1	2	2	1.1m Pop in 2010 so data pop is higher. Good match with boundary	FALSE	0.376062	2007	63	2007	7	2007			0	2007	6.34921	2007	0	2007	45	2007
WABI_022	Nicaragua	NIC	LMC	Managua	NIC.13.2_1	2	1	Populaiton matches well	FALSE	1.32632	2007	68	2007	8	2007			0	2007	0.735294	2007	0	2007	100	2007
WABI_023	Mozambique	MOZ	LIC	Maputo	MOZ.5.2_1	2	2	GIS has slightly higher population than referenced here. Could be Level 3 instead which has a lower population than reported here. Think Level 2 is best match as described as "District" level and GIS layer covers most of city	FALSE	0.866133	2009	82	2009	8	2009			0	2009	0	2009	0	2009	0	2009
WABI_024	Liberia	LBR	LIC	Monrovia	LBR.11.2.1_1	2 or 3	1	Both level 2 and 3 have same GIS data but think based on oher cities, Level 3 is the best match.	FALSE	0.617055	2013	37	2013	13	2013			0	2013	0	2013	0	2013	70	2013
WABI_025	Tanzania	TZA	LIC	Moshi	TZA.9.3_1	2	1	Good match on population and boundary	FALSE	0.779477	2007	60	2007	9	2007			0	2007	0	2007	0	2007	87	2007
WABI_026	Kenya	KEN	LIC	Nairobi	KEN.30_1	1	1	Good match on population and boundary	FALSE	0.958904	2007	52	2007	16.1	2007			0	2007	0	2007	0	2007	0	2007
WABI_027	Egypt	EGY	LMC	Qena	EGY.25.10_1	2	2	Better match with Level 2 and looking at GIS layer for comparison confirms but population reported here is lower than GIS. There is also a Qena city but that has a GIS population of zero so perhaps why. Added to Qena on LV2 instead.	FALSE	0.49576	2009	100	2009	12.5	2009			0	2009	0	2009	0	2009	0	2009
WABI_028	Philippines	PHL	LMC	Quezon City	PHL.47.14_1	2	1	Good match on population and boundary	FALSE	0.704859	2007	99	2007	16	2007			8	2007	0	2007	0	2007	98	2007
WABI_029	Netherlands	NLD	HIC	Rotterdam	NLD.14.67_1	2	1	600k pop seems plausible	FALSE	1.50971	2007	100	2007	6.8	2007			9.729	2007	13.271	2007	76.23	2007	100	2007
WABI_030	United States	USA	HIC	San Francisco	USA.5.38_1	2	1	804k pop on GIS seems reasonable	FALSE	1.66714	2007	100	2007	11	2007			13.344	2007	34.656	2007	0	2007	100	2007
WABI_031	Singapore	SGP	HIC	Singapore	SGP	0	1	Good match on population and boundary	FALSE	1.32132	2013	100	2013	11	2013			0.93	2013	4.07	2013	38	2013	100	2013
WABI_032	Bulgaria	BGR	UMC	Sofia	BGR.5.1_1	1 or 2	1	Good match on population and boundary	FALSE	1.01159	2011	100	2011	15.6	2011			0	2011	0	2011	0	2011	100	2011
WABI_033	Tunisia	TUN	LMC	Sousse	TUN.20.15_1+TUN.20.4_1+TUN.20.17_1+TUN.20.14_1+TUN.20.16_1	2	2	Several level 2 polygons represented this data point best	FALSE	0.622539	2007	100	2007	9	2007			0	2007	0	2007	0	2007	100	2007
WABI_034	India	IND	LMC	Surat	IND.11.28.2_1	3	2	Added to level 3 (Chorasi). Although this has a much lower GIS popualtion than that shown in the data here, this is believed to be due to an error in where the GIS popualtion is allcoated spatially. Chorosi in fact better matches city boundaries.	FALSE	0.330554	2010	93	2010	10	2010			16	2010	0	2010	0	2010	75	2010
WABI_035	United States	USA	HIC	Tompkins County	USA.33.56_1	2	1	Good match on population and boundary	FALSE	2.72632	2007	100	2007	11	2007			0	2007	37	2007	0	2007	100	2007
WABI_036	Bulgaria	BGR	UMC	Varna	BGR.24.11_1	2	1	Good match on population and boundary	FALSE	1.13947	2007	100	2007	15	2007			0	2007	2	2007	0	2007	99	2007
WABI_037	Spain	ESP	HIC	Vitoria-Gasteiz	ESP.16.1.3.12 1	4	2	Lv3 and 4 both good matches. Decided Lv3 as more likely level at which waste is managed	FALSE	1.06142	2012	100	2012	0.161	2012			0	2012	38	2012	0	2012	100	2012
WABI_038	India	IND	LMC	Warangal	IND.32.10.1_1	3	1	Added to Hanmakonda (LV3) which represent the Taluka which roughly covers the Greater Warangal Muncipal Corporation.	FALSE	0.366583	2012	95	2012	12	2012			31	2012	0	2012	0	2012	12	2012
WABI_039	Egypt	EGY	LMC	Abo Badawy Village	EGY.23.4_1	2	3	same issue.. Small village large boundries, also name a bit different, Ezbet Abou Badawi 306k pop	FALSE	0.567394	2012	100	2012	3	2012			0	2012	0	2012	0	2012	0	2012
WABI_040	Egypt	EGY	LMC	Assiut City	EGY.18.7_1	2	1	GIS population shows reasonable increase woith time	FALSE	0.248825	2012	100	2012	10.03	2012			0	2012	0	2012	0	2012	0	2012
WABI_041	Ethiopia	ETH	LIC	Aweday City	ETH.8.14.10_1	3	2	in the Haro maya region, GIS pop much bigger, gis boundry is much larger than the town and contains other urban areas. No level 4 to further disaggregate	FALSE	0.849938	2013	29	2013	3.3	2013			0	2013	0	2013	0	2013	0	2013
WABI_042	Ethiopia	ETH	LIC	Bale Robe	ETH.8.2.17_1	3	2	200k pop same isssue as above, small town big level 3 area covers the correct place	FALSE	0.331348	2013	30	2013	4	2013			0	2013	0	2013	0	2013	0	2013
WABI_043	Egypt	EGY	LMC	Banha City	EGY.12.5_1	2	2	GIS pop bigger as boudnary covers much more than just the city and no more granular levels. V densly populated even on the outskirts of the city so probably has caused this higher pop	FALSE	0.671613	2012	100	2012	13.5	2012			0	2012	0	2012	0	2012	0	2012
WABI_044	Egypt	EGY	LMC	Beila City	EGY.23.4_1	2	2	Think this is Biyala, in Kafr el sheikh(L1), is hard to find info on internet but one website says Beila is in Kafr el sh.. and one had the weather for 'bella' in this position. GIS has pop as 306k the area is a lot wider than the town itself	FALSE	0.796665	2012	100	2012	5	2012			0	2012	0	2012	0	2012	0	2012
WABI_045	China	CHN	UMC	Bengbu	CHN.1.2.1_1	3	2	840k pop on GIS bit low but I think this is due to the boundry being quirte small with densly populated areas lying outside the boundry may explain the increase	FALSE	0.723986	2018	100	2018	22	2018							73	2018	100	2018
WABI_046	Ethiopia	ETH	LIC	Bishoftu	ETH.8.15.1_1	3	2	in the adas region, small towns surround it in the L3. 339k GIS pop, probably larger due to the boundry size	FALSE	0.349996	2013	80	2013	7.8	2013			0	2013	0	2013	0	2013	0	2013
WABI_048	Ethiopia	ETH	LIC	Burie	ETH.3.6.2_1	3	2	sometimes called bure or burie-zuria, 186k pop on GIS fairly close given timeframe, also this covers wider area than just the town	FALSE	0.249066	2013	10	2013	13	2013			0	2013	0	2013	0	2013	0	2013
WABI_049	Ethiopia	ETH	LIC	Dilla	ETH.10.11.2_1	3	3	Not sure how long ago this pop was taken. City s cut in half by 3 boundries, this one covers the most part of the urban area. GIS has pop as 199k	FALSE	0.25008	2013	30	2013	6	2013			0	2013	0	2013	0	2013	0	2013
WABI_050	Ethiopia	ETH	LIC	Dire Dawa	ETH.5.1.1_1	3	2	424k pop on GIS not sure why it is this much higher as surrounding area has low density pop but might be to do with time of data pop and slightly extendend boundry. Seems to be in the right place ref google	FALSE	0.5	2013	60	2013	9	2013			0	2013	0	2013	0	2013	65	2013
WABI_051	Egypt	EGY	LMC	El Fateh City	EGY.18.4_1	2	3	Again I think this is on a smaller level than GIS has. Think this is the right place but is hard to be sure because of different spellings on maps and on google and in data. Pop also v different (327k pop) but this is likely due to the larger area level	FALSE	0.83599	2012	100	2012	10.03	2012			0	2012	0	2012	0	2012	0	2012
WABI_052	Egypt	EGY	LMC	El Zarabi Village	EGY.18.2_1	2	2	found in the Abu Tij region, AZ zarabi on map. 349k pop on GIS this village is veery small in comparison to the region but no smaller levels exist.	FALSE	0.434042	2012	100	2012	10.03	2012			0	2012	0	2012	0	2012	40	2012
WABI_053	Egypt	EGY	LMC	Fayoum City	EGY.4.1_1	2	3	960k pop on GIS al Fayyum is the placethat comes up in google but there are multiple spellings so tricky to say for sure3	FALSE	0.686103	2012	100	2012	6	2012			0	2012	0	2012	0	2012	0	2012
WABI_054	Ethiopia	ETH	LIC	Jijiga	ETH.9.3.5_1	3	2	392k pop on GIS 2020, may be plausible given timeframe and some smaller towns surrounding	FALSE	0.569781	2013	52	2013	20	2013			0	2013	0	2013	0	2013	0	2013
WABI_055	Ethiopia	ETH	LIC	Jimma	ETH.8.8.6_1	3	2	425k pop on GIS likely due to therr extended area of the L3s some dense pops surounding jimma, matches google	FALSE	0.248487	2013	40	2013	7	2013			0	2013	0	2013	0	2013	0	2013
WABI_056	Egypt	EGY	LMC	Kafr El Sheikh City	EGY.23.7_1	2	2	656k pop, covers the city and extra densly populated space that surrounds	FALSE	0.997391	2012	100	2012	5	2012			0	2012	0	2012	0	2012	0	2012
WABI_057	China	CHN	UMC	Lanzhou	CHN.5.7_1	2	2	4.2 mill pop on GIS big change but is likely due to the wider boundry around the city	FALSE	1.04934	2018	100	2018	12	2018							100	2018	100	2018
WABI_058	South Africa	ZAF	UMC	Mangaung	ZAF.2.3.1_1	3	1	853k pop reasonable increase	FALSE	0.806436	2015	90	2015	11.5	2015			0	2015	0	2015	0	2015	92	2015
WABI_059	South Africa	ZAF	UMC	Mbombela	ZAF.6.1.2_1	3	1	715k pop on GIS plausible increase correct location	FALSE	0.6	2015	30	2015	16	2015			0	2015	0	2015	0	2015	60	2015
WABI_060	South Africa	ZAF	UMC	Msunduzi	ZAF.4.6.5_1	3	1	681k pop on GIS plausible increase correct location	FALSE	0.444781	2015	77	2015	10	2015			0	2015	0	2015	0	2015	76	2015
WABI_061	Egypt	EGY	LMC	Sanmannoud City	EGY.5.8_1	2	2	spelt Samannnud on GIS, pop 384k, whixh is much higher but seems to be the rigfht place matching google and covers the entire city and more which may explain the increase, no L3s.	FALSE	0.856936	2012	100	2012	6	2012			0	2012	0	2012	0	2012	0	2012
WABI_062	Egypt	EGY	LMC	Senuris city	EGY.4.5_1	2	2	601k pop on GIS called sinnerus but seen online that Senuris is in the level one area it is here. Covers sinnerus but also some surrounding areas so may be the reason for the high pop	FALSE	0.691473	2012	100	2012	5	2012			0	2012	0	2012	0	2012	10	2012
WABI_063	Egypt	EGY	LMC	Shebin El Qanater City	EGY.12.9_1	2	2	544k pop, level very big so likely to include other urban areas	FALSE	0.686779	2012	100	2012	13.5	2012			0	2012	0	2012	0	2012	0	2012
WABI_064	Egypt	EGY	LMC	Suez City	EGY.15_1	1	1	670k pop plausible increase	FALSE	0.607345	2012	100	2012	0	2012			0	2012	0	2012	0	2012	0	2012
WABI_065	China	CHN	UMC	Suzhou	CHN.15.7_1	2	1	5.3mill pop on GIS reasonable increae in timeframe	FALSE	1.53624	2018	100	2018	20	2018							73	2018	100	2018
WABI_066	China	CHN	UMC	Taian	CHN.23.12.4_1	3	2	1.8mil pop on GIS perhaps due to dense outskirt areas	FALSE	1.12701	2018	100	2018	16	2018							64	2018	100	2018
WABI_067	Egypt	EGY	LMC	Tanta city	EGY.5.9_1	2	2	729k npop onm GIS bit of a large increase but may be plausible given the extended time frmae. Seems to be in the correct place	FALSE	0.939148	2012	100	2012	6	2012			0	2012	0	2012	0	2012	50	2012
WABI_068	Ethiopia	ETH	LIC	Woldia	ETH.3.11.5_1	3	2	243k pop on GIS, other data suggests 86k pop and location mathches with google so think is the right place. Boundry quite large and includes aanother urban area which may explain change in pop	FALSE	0.25079	2013	10	2013	27	2013			0	2013	0	2013	0	2013	0	2013
WABI_069	Ethiopia	ETH	LIC	Woliso	ETH.8.4.12_1	3	2	260k pop, l3 boundry contains other urban areas which likelyt explain the pop change. Matches google for location	FALSE	0.250228	2013	30	2013	5	2013			0	2013	0	2013	0	2013	0	2013
WABI_070	Ethiopia	ETH	LIC	Wolkite	ETH.10.12.8_1	3	2	118k pop on GIS, other populated areas surrounding the town may explain increase. Matches google location	FALSE	0.249066	2013	40	2013	7	2013			0	2013	0	2013	0	2013	0	2013
WABI_071	Ethiopia	ETH	LIC	Wuqro	ETH.11.4.6_1	3	2	179k pop, other populated areas surrounding the town may explain increase. Matches google location	FALSE	0.249619	2013	50	2013	5	2013			0	2013	0	2013	0	2013	0	2013
WABI_072	China	CHN	UMC	Xian	CHN.22.7.6_1	3	1	5.2mill pop seems reasonable difference, area covers the city centre	FALSE	1.70789	2018	100	2018	13	2018							94	2018	100	2018
WaW_001	Afghanistan	AFG	LIC	Jalalabad	AFG.22.9_1	2	1		FALSE	0.520246	2017	95	2017	5.64561	2017			0	2017	0	2017	0	2017	0	2017
WaW_002	Afghanistan	AFG	LIC	Kandahar	AFG.15.5_1	2	1		FALSE	0.813219	2017	95	2017	9.64252	2017			0	2017	0	2017	0	2017	0	2017
WaW_003	Afghanistan	AFG	LIC	Mazar-E-Sharif	AFG.4.11_1	2	2	Population differs with GIS population but believed to be same place	FALSE	0.237743	2017	95	2017	10.6613	2017			0	2017	0	2017	0	2017	0	2017
WaW_004	Afghanistan	AFG	LIC	Kabul	AFG.14.6_1	2	2	Population differs with GIS population but believed to be same place	FALSE	1.47297	2016	75	2016	11.1111	2016			0	2016	0	2016	0	2016	0	2016
WaW_005	Afghanistan	AFG	LIC	Herat	AFG.12.7_1	2	2	Population greatly differs with GIS population but believed to be same place	FALSE	0.784262	2017	95	2017	12.0612	2017			0	2017	0	2017	0	2017	0	2017
WaW_006	Albania	ALB	UMC	Vlora	ALB.12.3.13_1	3	1		FALSE	1.53858	2014	85	2014	11.1	2014			0	2014	0	2014	0	2014	0	2014
WaW_007	Albania	ALB	UMC	Korca	ALB.7.3.4_1	3	1		FALSE	1.12477	2017	100	2017	11	2017			0	2017	0	2017	0	2017	100	2017
WaW_008	Algeria	DZA	UMC	Algiers	DZA.4_1	1	2	Population is a bit smaller than GIS population. Added to level 1 as best fit	FALSE	1.30742	2016	100	2016	16.88	2016			1.11111	2016					91.3366	2016
WaW_009	Algeria	DZA	UMC	Mostaganem	DZA.30.17_1	2	2	Population is a much larger than GIS population but area shows a good match	FALSE	0.608828	2006			10.5	2006
WaW_010	American Samoa	ASM	UMC	Pago Pago	ASM.1_1	1	3	No population in data to check matching of city. Lv1 chosen as other areas are believed to be likely too small an area to manage waste independently.	FALSE					12.8
WaW_011	Angola	AGO	LMC	Luanda	AGO.11_1	1	1	Data added to level 1 as better match than level 2 to city boundaries.	FALSE	0.8	2009			12	2009
WaW_012	Argentina	ARG	UMC	Cordoba	ARG.6.2_1	2	1		FALSE	1.07708	2010	93.5	2010	14	2010			0	2010	0.68	2010	0	2010	69.7946	2010
WaW_013	Argentina	ARG	UMC	Ciudada Autonomous De Buenos Aires	ARG.5.1_1	1 or 2	1		FALSE	2.37152	2010	98.1	2010	16	2010									64.5815	2010
WaW_014	Argentina	ARG	UMC	Rosario	ARG.21.12_1	2	1		FALSE	1.53511	2010	65.6	2010	11.5358	2010			14.5608	2010	0	2010	0	2010	100	2010
WaW_017	Australia	AUS	HIC	Perth	AUS.11.101_1	2	1		FALSE					8.17547						18
WaW_018	Australia	AUS	HIC	Melbourne	AUS.10.44_1+AUS.10.31_1+AUS10.42_1+AUS.10.50_1+AUS.10.52_1+AUS.10.18_1+AUS.10.78_1+AUS.10.9_1+AUS.10.64_1+AUS.10.59_1+AUS.10.7_1+AUS.10.22_1+AUS.10.9_1+AUS.10.4_1+AUS.10.18_1+AUS.10.52_1+AUS.10.50_1+AUS.10.42_1+AUS.10.31_1+AUS.10.10_1+AUS.10.35_1+AUS.10.49_1+AUS.10.74_1+AUS.10.40_1+AUS.10.43_1+AUS.10.26_1+AUS.10.20_1+AUS.10.14_1	2	2	Population is of the wider urban agglomeration (from cities codebook). Level 2 splits Melbourne into several district. These are assumed to all represent the data point	FALSE					15.3285				0		25.81		0		100
WaW_019	Australia	AUS	HIC	Canberra	AUS.2.1_1	2	1	Also called Unincorporated Australiam Capital Territory	FALSE	2.71163	2010			4	2010			0	2010	70	2010	0	2010	93.3333	2010
WaW_020	Austria	AUT	HIC	Vienna	AUT.9_1	1	1		FALSE	1.63145	2013	100	2013	2.9	2013
WaW_021	Azerbaijan	AZE	UMC	Baku	AZE.1.2_1	2	1		FALSE	2.26878	2013	50.77	2013	10.3896	2013			0	2013	0	2013	39.9703	2013	100	2013
WaW_023	Bangladesh	BGD	LMC	Patuakhali	BGD.1.5.7_1	3	2	Data added to level 3 although GIS population bigger and covers larger area. Upazila deemed best fit for waste data	FALSE	0.366702	2012	60	2012	2.88971	2012			0	2012	0	2012	0	2012	0	2012
WaW_024	Bangladesh	BGD	LMC	Rajshahi	BGD.5.7.3_1	3	2	Data added to level 3 although GIS population smaller as believed to cover correct area and has a closer match with the GIS population than level 2.	FALSE	0.340274	2012	72	2012	4.05081	2012			0	2012	0	2012	0	2012	0	2012
WaW_025	Bangladesh	BGD	LMC	Rangpur	BGD.6.7.7_1	3	2	Data added to level 3 although GIS population bigger and covers larger area. Upazila deemed best fit for waste data	FALSE	0.756238	2012	32	2012	4.54909	2012			0	2012	0	2012	0	2012	0	2012
WaW_026	Bangladesh	BGD	LMC	Chittagong	BGD.2.4.4_1+BGD.2.4.2_1+BGD.2.4.19_1+BGD.2.4.18_1+BGD.2.4.17_1+BGD.2.4.14_1+BGD.2.4.13_1+BGD.2.4.11_1+BGD.2.4.9_1+BGD.2.4.8_1+BGD.2.4.7_1	3	2	City split into several level 3's so joined these to represent the City corporation.	FALSE	0.809519	2012	42	2012	7.21072	2012			1.4194	2012	0	2012	0	2012	0	2012
WaW_027	Bangladesh	BGD	LMC	Dhaka	BGD.3.1.4_1+BGD.3.1.3_1+BGD.3.1.2_1+BGD.3.1.1_1+BGD.3.1.46_1+BGD.3.1.45_1+BGD.3.1.44_1+BGD.3.1.42_1+BGD.3.1.43_1+BGD.3.1.41_1+BGD.3.1.40_1+BGD.3.1.39_1+BGD.3.1.38_1+BGD.3.1.37_1+BGD.3.1.35_1+BGD.3.1.34_1+BGD.3.1.33_1+BGD.3.1.32_1+BGD.3.1.31_1+BGD.3.1.30_1+BGD.3.1.28_1+BGD.3.1.27_1+BGD.3.1.25_1+BGD.3.1.26_1+BGD.3.1.24_1+BGD.3.1.23_1+BGD.3.1.22_1+BGD.3.1.20_1+BGD.3.1.19_1+BGD.3.1.18_1+BGD.3.1.17_1+…	3	2	City split into several level 3's so joined these to represent the City corporation.	TRUE	0.684782	2005	44	2005	4.1	2005			0	2005	0	2005	0	2005	0	2005
WaW_028	Belarus	BLR	UMC	Grodno	BLR.3.5_1	2	1	Also called Hrodna	FALSE	1.20056	2016	99	2016	8.6	2016			0	2016	0.6	2016	0	2016	100	2016
WaW_029	Belarus	BLR	UMC	Minsk	BLR.5.11_1	2	1		FALSE	1.62441	2016	100	2016	10.0958	2016			0	2016	0	2016	0	2016	97	2016
WaW_030	Belgium	BEL	HIC	Liege	BEL.3.3.2_1	3	2	Data population slightly higher than GIS but there is a good match with the city boundary	FALSE	1.41016	2014	100	2014					17	2014	53	2014	26	2014	100	2014
WaW_031	Belgium	BEL	HIC	Brussels	BEL.1.1.1_1	3	1		FALSE	1.11417	2013	100	2013	11	2013
WaW_032	Belize	BLZ	UMC	San Pedro	BLZ.3_1	1	2	Level 1 (regional level) is the maximum granularity of admin layers. The data point was assumed representative of the region.	FALSE	1.95934	2015	57.6	2015	13	2015			0	2015	0	2015	0	2015	100	2015
WaW_033	Belize	BLZ	UMC	Belize City	BLZ.1_1	1	2	Level 1 (regional level) is the maximum granularity of admin layers. The data point was assumed representative of the region.	FALSE	1.9858	2015	66	2015	21	2015			0	2015	0	2015	0	2015	100	2015
WaW_034	Benin	BEN	LIC	Porto Novo	BEN.10_1	1	2	Data added to level 1 despite the level 1 the area being much bigger than the city, therefore data assumed representative of the larger area. Also called Oueme	TRUE	0.5	2000	25	2000
WaW_035	Benin	BEN	LIC	Cotonou	BEN.8.1_1	2	1		TRUE	1.1028	2000	50	2000	4.43	2000
WaW_036	Bhutan	BTN	LMC	Thimphu	BTN.14.1_1	2	2	Thimphu split into a few disitrcts but the district selected (Chang) covers the majortiy of the city	FALSE	0.516046	2016	95	2016	13.4865	2016			8.88889	2016	0	2016	0	2016	0	2016
WaW_037	Bhutan	BTN	LMC	Phuentsholing	BTN.2.10_1	2	1		FALSE	0.447368	2014	95	2014	12.0879	2014			0	2014	0	2014	0	2014	100	2014
WaW_038	Bolivia	BOL	LMC	La Paz	BOL.4.17.3_1	3	1	Good match with population and municipal level according to GADM	FALSE	0.733513	2010	90	2010	15.2	2010			1.11111	2010					100	2010
WaW_039	Bosnia and Herzegovina	BIH	UMC	Banja Luka	BIH.3.1.1_1	3	1		FALSE	1.22887	2015	81.65	2015	22.2777	2015			0	2015	0	2015	0	2015	100	2015
WaW_040	Bosnia and Herzegovina	BIH	UMC	Sarajevo	BIH.2.6_1	2	2	Sarajevo city is comprised of several level 3 districts. Instead added this data point to level 2 although this is bigger than the city as was closer match to th epopulation recorded	FALSE	1.3266	2014	95	2014	2.51256	2014
WaW_041	Botswana	BWA	UMC	Gaborone	BWA.4_1	1	2	Data population bigger than GIS but areas seems to match	FALSE	0.7	2011			4.5	2011
WaW_042	Brazil	BRA	UMC	Rio De Janeiro	BRA.19.67_1	2	1		FALSE	1.43	2014	100	2014	21.2371	2014			0	2014	0.5	2014	0	2014	100	2014
WaW_043	Brazil	BRA	UMC	Brasilia	BRA.7.1_1	2	1		FALSE	0.784525	2016	98	2016	14.6707	2016			0	2016	0	2016	0	2016	100	2016
WaW_044	Brazil	BRA	UMC	Sao Paulo	BRA.25.564_1	2	1		FALSE	1.1068	2014	97.8	2014	10.101	2014			3	2014	0	2014	0	2014	81.4433	2014
WaW_047	Burkina Faso	BFA	LIC	Bobo Dioulasso	BFA.9.1.2_1	3	2	GIS population higher than that of this data but believed to be correct scale	TRUE	0.675549	1999
WaW_048	Burkina Faso	BFA	LIC	Ouagadougou	BFA.7.1.4_1	3	2	GIS population higher than that of this data but believed to be correct scale	TRUE	0.65	2003	47.1	2003	10	2003
WaW_049	Burundi	BDI	LIC	Muyinga	BDI.13.6_1	2	2	Population data changed from original due to error in that reported. See comment in population cell.	FALSE	0.112134	2013							0	2013	0	2013	0	2013	0	2013
WaW_050	Burundi	BDI	LIC	Kayanza	BDI.9.5_1	2	2	Population data changed from original due to error in that reported. See comment in population cell.	FALSE	0.113108	2013
WaW_051	Burundi	BDI	LIC	Ngozi	BDI.15.6_1	2	2	GIS population is much higher than data population, but cross comparison on GIS seems to match	FALSE	0.463845	2013							0	2013	0	2013	0	2013	0	2013
WaW_052	Burundi	BDI	LIC	Bujumbura	BDI.2_1	1	2	GIS population is slightly higher. Data allocated to level 1 as has best match with city boundaries	FALSE	1.4	2013	14	2013					0	2013	0	2013	0	2013	0	2013
WaW_053	Cote d Ivoire	CIV	LMC	Abidjan	CIV.1.1.1_1	3	1	Good match with population and city boundaries.	FALSE	0.79221	2010	48	2010	7.84314	2010
WaW_054	Cambodia	KHM	LMC	Phnom Penh	KHM.16_1	1	1	Added to level 1 due to Phnom Penh being a special administrative unit essentially acting as a municipality	FALSE	1.12652	2015	84	2015	6	2015			0.15	2015	0	2015	0	2015	0	2015
WaW_055	Cameroon	CMR	LMC	Limbe	CMR.9.1_1	2	2	Added to department level (Lv2) as Lv3 splits Limbe	FALSE					12.4
WaW_056	Cameroon	CMR	LMC	Douala	CMR.5.4_1	2	1	Also called Wouri	TRUE	0.7	2000	60	2000
WaW_057	Cameroon	CMR	LMC	Yaounde	CMR.2.7_1	2	2	GIS population slightly lower. Also called Mfoundi	FALSE	1.01798	2012	43	2012
WaW_058	Cameroon	CMR	LMC	Bafoussam	CMR.8.6_1	2	1	Population better matches Lv3 but boundary better matches Lv2. Chose Lv2 as matches other city levels in country.	TRUE	0.425864	2000
WaW_059	Canada	CAN	HIC	Ottawa	CAN.9.35_1	2	1		FALSE	0.953083	2013			7.3	2013					42.5	2013
WaW_060	Canada	CAN	HIC	Toronto	CAN.9.50_1	2	1		FALSE	0.922407	2016			10.9671	2016			3.49009	2016	47.91	2016	0	2016	100	2016
WaW_061	Canada	CAN	HIC	Vancouver	CAN.2.14_1	2	1		FALSE	1.01087	2014			17	2014
WaW_062	Chile	CHL	HIC	Santiago De Chile	CHL.14.5_1	2	3	Santiago is split into multiple districts at all levels. Think Santiago at level 2 OR 3 best matches but data population is much bigger than GIS population.	FALSE	1.22561	2013	98	2013	9.52381	2013			0	2013	0	2013	0	2013	100	2013
WaW_063	China	CHN	UMC	Beijing	CHN.2.1_1	2	1	Data poitn matches best with level 2.	FALSE	1.06221	2015			12.7	2015			2	2015	0	2015	8	2015	100	2015
WaW_064	Colombia	COL	UMC	Cali	COL.30.32_1	2	1		FALSE	0.832911	2009	99	2015	3.21	2015			0	2015	15	2015	0	2015	100	2015
WaW_065	Colombia	COL	UMC	Medellin	COL.2.68_1	2	1		FALSE	0.535593	2015	98.9	2013	9.37	2013			0	2013	16	2013	0	2013	100	2013
WaW_066	Colombia	COL	UMC	Bogota	COL.14.79_1	2	1		FALSE	0.699696	2011	100	2013	19.03	2013			0	2013	17	2013	0	2013	100	2013
WaW_067	Comoros	COM	LIC	Moroni	COM.2_1	1	3	Level 1 is at the island level, of which Morini is within. The GIS population is much bigger than the data population for this reason but the city is assumed representative of the island.	FALSE			60						0		0		0		40
WaW_068	Democratic Republic of the Congo	COD	LIC	Kinshasa	COD.10.1_1	2	2	Data has much higher population than GIS but area matches well	FALSE	0.604125	2016							0	2016	0	2016	0	2016	0	2016
WaW_069	Republic of Congo	COG	LMC	Dolisie	COG.8.4_1	2	2	Data has much higher population than GIS and level 2 covers area bigger than that of city, but is the most granular	FALSE	0.506128	2012			6.2	2012
WaW_070	Costa Rica	CRI	UMC	Alajuela	CRI.1.1_1	2	2	Small mismatch in populations due to admin boudnaries not fully matching entirety of city	FALSE	0.869596	2016	100	2016	12.6	2016			0	2016	0.42	2016	0	2016	100	2016
WaW_071	Costa Rica	CRI	UMC	San Jose	CRI.7.15_1	2	2	Small mismatch in populations due to admin boudnaries not fully matching entirety of city	FALSE	1.17141	2010	100	2016	10	2016			0	2016	5.2	2016	0	2016	99.5992	2016
WaW_072	Croatia	HRV	HIC	Zagreb	HRV.4.7_1	2	1		FALSE	1.02013	2015	100	2015	21.9	2015
WaW_073	Croatia	HRV	HIC	Cakovec	HRV.10.2_1	2	1		FALSE	1.50961	2015
WaW_074	Cuba	CUB	UMC	Havana	CUB.4_1	1	1	Data fits with level 1 best.	FALSE	0.7	2015	100	2015	8	2015			0	2015	0	2015	0	2015	97	2015
WaW_076	Cyprus	CYP	HIC	Paralimini	CYP.1_1	1	2	Data is at city level but admin layer goes to regional level as a maximum. It is therefore assumed this city data is representative of the region.	FALSE					17
WaW_077	Czech Republic	CZE	HIC	Karlovy Vary	CZE.3.2_1	2	2	Data population is more than GIS popualtion but believed to be good match otherwise	FALSE	1.20411	2014
WaW_078	Czech Republic	CZE	HIC	Prague	CZE.11_1	1	1	Good match at level 1 but default is level 2 - municipality level	FALSE	0.88349	2013
WaW_079	Denmark	DNK	HIC	Copenhagen	DNK.1.25_1	2	1		FALSE	1.12346	2014	100	2014
WaW_080	Djibouti	DJI	LMC	Djiibouti City	DJI.3.1_1	2	1		TRUE	0.594059	2002							0	2002	0	2002	0	2002	0	2002
WaW_081	Dominican Republic	DOM	UMC	Santo Domingo	DOM.5.1_1	1 or 2	2	Main part of Santo Domingo is called Distrito Nacional however the city extends beyong this. The Data population is higher than GIS for this reason, however, the majority of the city is covered so it is deemed a reasonable match.	FALSE	1.47451	2013	85	2013	8.8845	2013			0	2013	0	2013	0	2013	72	2013
WaW_082	Ecuador	ECU	UMC	Quito	ECU.19.6_1	2	1		FALSE	0.955056	2012	89	2012	14.21	2012									100	2012
WaW_083	Egypt	EGY	LMC	Cairo	EGY.11_1	1	1	Added to level 1 as provided best fit	FALSE	1.66667	2012	65	2012	3.8	2012
WaW_084	El Salvador	SLV	LMC	San Salvador	SLV.10.16_1	2	2	Data population much greater than GIS however this is likely due to municipality of San Salvador not covering the entirety of the city. It is deemed however a reasonable approximation	FALSE	0.733625	2013	65.38	2013	11	2013			0	2013	0	2013	0	2013	100	2013
WaW_086	Estonia	EST	HIC	Tallinn	EST.1.20_1	2	1		FALSE	1.41549	2012			14	2012
WaW_087	Estonia	EST	HIC	Tartummaa	EST.13.18_1	2	2	Data population larger than GIS population but area matches well	FALSE					0.0699301
WaW_088	Ethiopia	ETH	LIC	Adola Woyu	ETH.8.5.1_1	3	2	Data population is significatnly smaller than GIS population but believed to be correct place.	FALSE	0.270017	2015			6.30946	2015
WaW_089	Ethiopia	ETH	LIC	Bule Hora	ETH.8.3.3_1	3	2	Bule Hora is a city in the region of the same name (lv3), therefore GIS population is larger than data. The city data is assumed representative of the region.	FALSE	0.570024	2015			5.4	2015
WaW_090	Ethiopia	ETH	LIC	Addis Ababa	ETH.1.1_1	1 or 2	1	Fits with level 1 Or 2 best	FALSE	0.542829	2010	70	2010	12.6059	2010
WaW_091	Ethiopia	ETH	LIC	Maichew	ETH.11.1.3_1	3	2	Maichew is a town within Endamehoni district (level 3) therefore population of GIS slightly larger. Maichew data is assumed representative of Endamehoni district	FALSE	0.400591	2015			5.55836	2015
WaW_092	Ethiopia	ETH	LIC	Tepi	ETH.10.18.3_1	3	2	Tepi is a town within the Yeki district (level 3), therefore GIS population slightly larger. Tepi is assumed representative of Yeki	FALSE	0.35626	2015			1.00503	2015
WaW_093	Ethiopia	ETH	LIC	Gerbe Guracha	ETH.8.17.11_1	3	2	Gerbe Guracha is a town within the Kuyu district (level 3), therefore GIS population slightly larger. Gerbe Guracha is assumed representative of Kuyu	FALSE	0.348937	2015			4.25441	2015
WaW_094	Ethiopia	ETH	LIC	Weldiya	ETH.3.11.5_1	3	2	Debre Tabor is a town within the Farta district (level 3), therefore GIS population slightly larger. Debre Tabor is assumed representative of Farta	FALSE	0.151951	2015			7.53769	2015
WaW_095	Ethiopia	ETH	LIC	Debre Tabor	ETH.3.4.4_1	3	2	Weldiya is a town within the Guba Lafto district (level 3), therefore GIS population slightly larger. Weldiya is assumed representative of Guba Lafto	FALSE	0.228699	2015			1.02041	2015
WaW_096	Ethiopia	ETH	LIC	Bati	ETH.3.9.2_1	3	2	Bati at Level 3 is actually the region which contains the town of Bati, therefore GIS population is slightly larger. It is assumed the data is representative of the region.	FALSE	0.195981	2015			6.95348	2015
WaW_097	Ethiopia	ETH	LIC	Dire Dawa	ETH.5.1.1_1	3	2	Dire Dawa at level 3 is the region which contains the town of Dire Dawa, therefore the GIS population is larger. The town data here is assumed representative of the region. There is also a administrative region adjacent called Dire Dawa/Town although this does not appear to overlap the town in GIS and the population is much lower.	FALSE	0.724638	2015	69	2015	9.95025	2015			0	2015	0	2015	0	2015	0	2015
WaW_098	Ethiopia	ETH	LIC	Halaba Kulito	ETH.10.1.1_1	3	2	Halaba Kulito is a town within the Alaba district (level 3), therefore GIS population slightly larger. Halaba Kulito is assumed representative of Alaba	FALSE					3.6963
WaW_099	Ethiopia	ETH	LIC	Dembi Dolo	ETH.8.9.9_1	3	2	Dembi Dolo is a town within the Sayo district (level 3), therefore GIS population slightly larger. Dembi dolo is assumed representative of Sayo	FALSE	0.220014	2015			2.2897	2015
WaW_100	Fiji	FJI	UMC	Suva	FJI.1.3_1	2	2	Suva is a city in the Rewa province which is the most granular level the administrative boudnaries go. Suva is assumed representative of Rewa.	FALSE	0.773256	2012	100	2012	8.03213	2012
WaW_101	Finland	FIN	HIC	Oulu	FIN.3.2.3.8_1	4	2	Data population is much bigger than GIS population, but are matches well.	FALSE									0		0		0		100
WaW_102	Finland	FIN	HIC	Riihimaki	FIN.5.9.4.3_1	4	1		FALSE					15.7842
WaW_103	Finland	FIN	HIC	Turku	FIN.5.3.4.16_1	4	1		FALSE					17.6176
WaW_104	France	FRA	HIC	Paris	FRA.8.3_1	2	1	Level 2 selected as good match on population and boundary	FALSE	1.32778	2015	100	2015	16.7	2015			0	2015	17.1	2015	77.5	2015	100	2015
WaW_105	France	FRA	HIC	Angers-Loire Metropole	FRA.12.2.1_1	3	2	Waste management is at the commune level (Lv5) in France, however there are 37,000 of these and often very small so in rural areas will often join forces. Angers-Loire Metropole is a collection of communes, although not represented by the administrative boundaries, Level 3 best matches the size but is slightly larger than teh metropole therefore GIS population is slightyl bigger.	FALSE	1.34668	2015	100	2015					22.9364	2015	17.66	2015	0.230869	2015	91.5182	2015
WaW_106	Gabon	GAB	UMC	Libreville	GAB.1.2_1	2	2	Regional level (Lv2) is the most granual although this is larger than the city. Libreville is within the Komo-Mondah region however and forms a large part of it therefore it is assumed to be representative.	TRUE	1.61759	2005	57	2005					0	2005	0	2005	0	2005	0	2005
WaW_107	Gambia	GMB	LIC	Banjul	GMB.1_1	1	1	Data is at level 1 but default is level 2	TRUE	0.661631	2002	35	2002	0	2005
WaW_108	Georgia	GEO	LMC	Tbilisi	GEO.12.1_1	2	1		FALSE			100		12.9611
WaW_109	Germany	DEU	HIC	Berlin	DEU.3.1.1_1	1 or 2 or 3	1		FALSE	1.03842	2015			8	2015			0	2015	28	2015	65	2015	100	2015
WaW_110	Germany	DEU	HIC	Hamburg	DEU.6.1.1_1	1 or 2 or 3	1		FALSE					1.60048
WaW_111	Ghana	GHA	LMC	Accra	GHA.5.1_1	2	1		FALSE	1.02041	2013	82.5	2013	10.3175	2013			0	2013	0	2013	0	2013	0	2013
WaW_112	Ghana	GHA	LMC	Kumasi	GHA.1.16_1	2	1		FALSE	0.74	2015			17.5824	2015
WaW_113	Greece	GRC	HIC	Athens	GRC.3.1.12_1	3	1		FALSE	1.28081	2012			0.00995818	2012
WaW_114	Greece	GRC	HIC	Thessaloniki	GRC.6.1.35_1	3	2	Data population bigger than GIS as municipality boundary is smaller than city boundary, but is a close match	FALSE	1.01015	2015			13.9	2015
WaW_115	Guatemala	GTM	UMC	Guatemala City	GTM.7_1	1	1	Added to level 1 as best fit	FALSE	0.629458	2013	72	2013	17	2013			0	2013	0	2013	0	2013	0	2013
WaW_116	Guatemala	GTM	UMC	Antigua Guatemala	GTM.16.2_1	2	1		FALSE	0.560026	2011			12	2011
WaW_117	Guatemala	GTM	UMC	Jutiapa	GTM.11.10_1	2	2	Data population larger than GIS but area matches well	FALSE	0.357144	2014	12.5	2014	11.8118	2014			0	2014	0	2014	0	2014	0	2014
WaW_118	Guinea	GIN	LIC	Conakry	GIN.2.1_1	2	1		TRUE	0.755477	1996	76	1996	5.30531	1996
WaW_119	Haiti	HTI	LIC	Port Au Prince	HTI.8.5_1	2	1	Added to level 2 as best match	FALSE	0.7	2015	12.4	2015	15.4	2015			0	2015	0	2015	0	2015	100	2015
WaW_120	Honduras	HND	LMC	Tegucigalpa	HND.8.4_1	2	1		FALSE	0.754296	2015	97	2015	8.16327	2015									92.4997	2015
WaW_121	Honduras	HND	LMC	San Pedro Sula	HND.6.10_1	2	1		FALSE	0.931526	2016	59	2016	11.2611	2016
WaW_122	Hungary	HUN	HIC	Debrecen	HUN.9.3_1	2	1		FALSE					15.4277
WaW_123	Hungary	HUN	HIC	Budapest	HUN.5.1_1	2	1		FALSE	1.57035	2014			21.1577	2014			0	2014	0	2014	52	2014	0	2014
WaW_124	India	IND	LMC	Greater Mumbai	IND.20.18_1+IND.20.17_1	2	2	Greater Mumbai incorporates two Level 3 vectors.	FALSE	0.54841	2016	100	2016	0	2016			0	2016	0	2016	0	2016	0	2016
WaW_125	India	IND	LMC	Delhi	IND.25.1.1_1	1 or 2 or 3	1		FALSE	0.993907	2014	76.5	2014	0	2014			12.7243	2014	0	2014			0	2014
WaW_126	India	IND	LMC	Bengaluru	IND.16.3.2_1	3	2	Added to level 3 but could possible represent Level 2.	FALSE	0.487661	2016	85	2016	12	2016			17.5015	2016	0	2016	0	2016	0	2016
WaW_127	India	IND	LMC	Greater Hyderabad	IND.32.2.1_1	3	3	Data population much larger than GIS data as represents Greater Hyderabad where GIS only represents Hyderabad. Greater Hyderabad assumed representative of Hyderabad.	FALSE	0.75109	2016	89	2016	8.60484	2016			48.8889	2016	0	2016	0	2016	21.7391	2016
WaW_128	India	IND	LMC	Chennai	IND.31.2_1	2	2	Chennai is split into several level 3 areas. This data was therefore added to level 2 instead. GIS population is slightly smaller than city population	FALSE	0.832753	2016	90	2016	7.04987	2016			1	2016	0	2016	0	2016	100	2016
WaW_129	India	IND	LMC	Ahmedabad	IND.11.1.1_1	3	2	Data population slightly bigger than GIS population	FALSE	0.518516	2016	98	2016	10	2016			42.623	2016					100	2016
WaW_130	India	IND	LMC	Surat	IND.11.28.2_1	3	1	GADM layer actually called Chorasi	FALSE	0.31865	2016	97	2016					23.6181	2016	0	2016	0	2016	0	2016
WaW_131	India	IND	LMC	Pune	IND.20.26.7_1	3	1	Level 3 name is n.a. ( 1612). Both this Pune data row and that of the Pimpri-Chinchwad data row (below) fall within the Level 3 boundary called n.a. ( 1612). Applied a weighted average based on population between both when entering data into adminstrative boundaries form and summed population.	FALSE	0.560922	2016	97	2016	5	2016			30.9715	2016	0	2016	0	2016	0	2016
WaW_132	India	IND	LMC	Jaipur	IND.29.17.6_1	3	1		FALSE	0.502914	2016	97	2016					16.7331	2016	0	2016	0	2016	0	2016
WaW_133	India	IND	LMC	Lucknow	IND.34.49.1_1	3	1		FALSE	0.506845	2016	97	2016	0	2016			23.4694	2016	0	2016	0	2016	0	2016
WaW_134	India	IND	LMC	Kanpur	IND.34.43.3_1	3	1		FALSE	0.597023	2016	90.8	2016	2.25338	2016			57.1394	2016	0	2016
WaW_135	India	IND	LMC	Nagpur	IND.20.19.8_1	3	2	Data population bigger than GIS data but believed to be correct location	FALSE	0.454656	2016	96	2016	12	2016			15.625	2016	0	2016	0	2016	0	2016
WaW_136	India	IND	LMC	Indore	IND.19.23.2_1	3	1		FALSE	0.451264	2016	100	2016	3.5	2016			50	2016	0	2016	0	2016	0	2016
WaW_137	India	IND	LMC	Ludhiana	IND.28.12.3_1	3	1		FALSE	0.597826	2016	29.3	2016	16.0481	2016			0	2016	0	2016	0	2016	0	2016
WaW_138	India	IND	LMC	Bhopal	IND.19.9.2_1	3	1		FALSE	0.50844	2016	87.5	2016					21.85	2016	0	2016	0	2016	0	2016
WaW_139	India	IND	LMC	Vishakhapatnam	IND.2.10.8_1	3	1		FALSE	0.561301	2016	100	2016	0	2016			0	2016	0	2016	0	2016	0	2016
WaW_140	India	IND	LMC	Pimpri-Chinchwad	IND.20.26.7_1	3	1	Level 3 name is n.a. ( 1612). Both this Pimpri-Chinchwad data row and that of the Pune data row (above) fall within the Level 3 boundary called n.a. ( 1612). Applied a weighted average based on population between both when entering data into adminstrative boundaries form and summed population.	FALSE	0.431211	2016	100	2016	13.718	2016			75	2016					98.1862	2016
WaW_141	India	IND	LMC	Patna	IND.5.26.4_1	3	2	GIS population slightly bigger than data as covers larger area.	FALSE	0.846152	2016	65	2016					0	2016	0	2016	0	2016	0	2016
WaW_142	India	IND	LMC	Ghaziabad	IND.34.30.1_1	3	2	GIS population much bigger than data as covers larger area.	FALSE	0.451887	2016	100	2016	9.12	2016			40	2016	0	2016	0	2016	0	2016
WaW_143	India	IND	LMC	Nashik	IND.20.22.7_1	3	1		FALSE	0.273907	2016	100	2016					0	2016	0	2016	0	2016	36.3636	2016
WaW_144	India	IND	LMC	Rajkot	IND.11.26.11_1	3	1		FALSE	0.373659	2016	99	2016	2.11	2016			0	2016	0	2016	0	2016	0	2016
WaW_145	India	IND	LMC	Faridabad	IND.12.3.1_1	3	2	GIS population slightly bigger than data as covers larger area.	FALSE	0.469573	2016			16.08	2016			46.397	2016	0	2016	0	2016	0	2016
WaW_146	India	IND	LMC	Allahabad	IND.34.45.1_1	3	2	Data population lower than that of GIS data as GIS vector covers area larger than city.	FALSE	0.853682	2016	65	2016					28	2016	0	2016	0	2016	0	2016
WaW_147	India	IND	LMC	Dhanbad	IND.15.4.2_1	3	2	GIS population much bigger than data as covers larger area.	FALSE	0.542549	2016	86	2016
WaW_148	India	IND	LMC	Srinagar	IND.35.6.2_1	3	3	Data population much bigger than GIS depsite GIS vector covering larger area. Srinagar falls in the Pauri GADM level 3 layer.	FALSE	0.423313	2016	60	2016					0	2016	0	2016	0	2016	0	2016
WaW_149	India	IND	LMC	Vijaywada	IND.2.5.10_1	3	2	Populations match reasonably well however GIS vector actually covers a much larger area than the city itself	FALSE	0.499212	2016	100	2016					25.5	2016	0	2016	0	2016	0	2016
WaW_150	India	IND	LMC	Amritsar	IND.28.1.2_1	3	1	Also called Baba Bakala	FALSE	0.550167	2016	48.15	2016	1	2016			0	2016	0	2016	0	2016	0	2016
WaW_151	India	IND	LMC	Navi Mumbai	IND.20.33.7_1	3	2	GIS population much bigger than data as covers larger area. GADM level 3 called Thane and incorporates both Thane and Navi Mumbai. Data assumned representative of both	FALSE	0.591898	2016	98	2016	0	2016			82	2016	0	2016	0	2016	100	2016
WaW_152	India	IND	LMC	Gwalior	IND.19.20.2_1	3	2	GIS population slightly bigger than data as covers larger area.	FALSE	0.500734	2016	71	2016	11.2534	2016			39.5	2016	0	2016	0	2016	0	2016
WaW_153	India	IND	LMC	Mysore	IND.16.23.4_1	3	1		FALSE	0.431395	2016	88.06	2016	13	2016			61.7284	2016	0	2016	0	2016	100	2016
WaW_154	India	IND	LMC	Coimbatore	IND.31.3.1_1	3	2	GIS population much bigger than data as covers larger area.	FALSE	0.88695	2016	95.5	2016	0	2016			69.0323	2016					100	2016
WaW_155	India	IND	LMC	Jodhpur	IND.29.22.3_1	3	2	GIS population slightly bigger than data as covers larger area. Level 3 name is n.a. ( 652)	FALSE	0.417796	2016	79	2016	15.3446	2016			31.385	2016	0	2016	0	2016	0	2016
WaW_156	India	IND	LMC	Kota	IND.29.24.2_1	3	1	There are two Kota's in India. This is believed to apply to the one in the Rajasthan state due to close match in population	FALSE	0.911013	2016	65	2016	15	2016			0	2016	0	2016	0	2016	0	2016
WaW_157	India	IND	LMC	Guwahati	IND.4.15.1_1	3	1	There are three Level 3 'Guwahait's'. This data was added to the one named 'Kamrup Metropolitan' in Level 2. Data was still added at the Level 3 however.	FALSE	0.750846	2016	85	2016					9.85577	2016	0	2016	0	2016	0	2016
WaW_158	India	IND	LMC	Bhubaneswar	IND.26.19.1_1	3	1		FALSE	0.62072	2016	100	2016					0	2016	0	2016	0	2016	0	2016
WaW_159	India	IND	LMC	Warangal	IND.32.10.1_1	3	1		FALSE	0.487015	2016	100	2016	13.74	2016			5.73687	2016	0	2016	0	2016	0	2016
WaW_160	India	IND	LMC	Cuttack	IND.26.7.3_1	3	2	GIS population much bigger than data as covers larger area.	FALSE	0.357144	2016	84	2016					0	2016	0	2016	0	2016	0	2016
WaW_161	India	IND	LMC	Kochi	IND.17.2.3_1	3	2	Assumed to better represent the mainland area of Kochi (Cochi) known as Ernakulum	FALSE	0.32765	2016	100	2016	21.6	2016			51.4031	2016	0	2016	0	2016	99.7375	2016
WaW_162	India	IND	LMC	Tirunelveli	IND.31.27.9_1	3	1		FALSE	0.444346	2016	90	2016					0	2016	0	2016	0	2016	0	2016
WaW_163	India	IND	LMC	Kozhikode	IND.17.8.1_1	3	2	Data population is much smaller than GIS population as GIS boundary is larger than just the city.	FALSE	0.817826	2016	85	2016					29.4118	2016	0	2016	0	2016	0	2016
WaW_164	India	IND	LMC	Imphal	IND.21.5.1_1	3	2	Population matches reasonably well however GIS GADM layer shows it actually splits the city of Imphal in half, with the Imphal named vector covering the western portion of the city.	FALSE	0.298237	2016	100	2016	5	2016
WaW_165	India	IND	LMC	Shimla	IND.13.9.9_1	3	2	Data population bigger than GIS data but believed to be correct location	FALSE	0.611059	2016	90	2016					0	2016	0	2016	0	2016	0	2016
WaW_166	India	IND	LMC	Tenali	IND.2.4.7_1	3	2	GIS population slightly bigger than data as covers larger area.	FALSE	0.593791	2016	97	2016	0	2016			3.38164	2016	0	2016	0	2016	0	2016
WaW_167	India	IND	LMC	Rudrapur	IND.35.12.1_1	3	2	GIS population bigger than data as covers larger area. Lvel 3 name is Bazpur	FALSE	0.457136	2016	92	2016					0	2016	0	2016	0	2016	0	2016
WaW_168	India	IND	LMC	Tadipatri	IND.2.1.10_1	3	2	GIS population slightly bigger than data as covers larger area. Called Tadpatri in GADM	FALSE	0.369518	2016	100	2016	12.5	2016			70	2016	0	2016	0	2016	0	2016
WaW_169	India	IND	LMC	Itanagar	IND.3.10.1_1	3	2	GIS population slightly bigger than data as covers larger area. There are three level 3 Itanagars, here we chose the data to represent Itanagar with Level 2 name 'Lower Subansiri' as this matched with the town of Itanagar.	FALSE	1.34454	2016	75	2016	7	2016			83.8926	2016	0	2016	0	2016	0	2016
WaW_170	India	IND	LMC	Leh	IND.14.13.1_1	3	2	GIS population much bigger than data population as covers are muhch larger than the town. Believed to be the same place however. Level 3 name is n.a. ( 1)	FALSE	1.90169	2016	100	2016					0	2016	0	2016	0	2016	0	2016
WaW_171	Indonesia	IDN	LMC	Jakarta	IDN.7_1	1	1	Added to level 1 as best fit	FALSE	0.798701	2010	80	2010	13.2487	2010			0	2010	0	2010	0	2010	0	2010
WaW_172	Iran	IRN	UMC	Tehran	IRN.28.8_1	2	1	Population slightly higher in data than GIS but generally good match	FALSE	0.931926	2014	100	2014	7	2014			51.9	2014	4	2014			0	2014
WaW_173	Iraq	IRQ	UMC	Baghdad	IRQ.10.1_1	2	2	Population of data more than GIS data but area matches very well with the city	FALSE	1.37216	2015	93.7	2015					0	2015	0	2015	0	2015	0	2015
WaW_174	Ireland	IRL	HIC	Dublin	IRL.6_1	1	2	Population of data half that of GIS, this is due to adminsitrative levels only going up to county level so larger than city.	FALSE	0.741978	2012	100	2012	8	2012			0	2012	49	2012	0	2012	0	2012
WaW_176	Israel	ISR	HIC	Jerusalem	ISR.6_1	1	1		FALSE											5
WaW_177	Israel	ISR	HIC	Tel Aviv	ISR.7_1	1	2	Population of data more than GIS data but area matches very well with the city	FALSE									0		10.6		0		0
WaW_178	Italy	ITA	HIC	Milano	ITA.10.8_1	2	1	Although best match level 3, believe level 2 is more likely to be the level at which waste is managed in Italy so added to Lv 2	FALSE	1.48004	2015	100	2015	12.6	2015			0	2015	49.9	2015	43.472	2015	100	2015
WaW_179	Italy	ITA	HIC	Parma	ITA.6.5_1	2	1	Although best match level 3, believe level 2 is more likely to be the level at which waste is managed in Italy so added to Lv 2	FALSE	1.38016	2014	100	2014	26.4	2014			0	2014	72	2014	0	2014	0	2014
WaW_180	Japan	JPN	HIC	Osaka	JPN.33.27_1	2	1		FALSE	1.04403	2015	100	2015	19.9	2015			0	2015	9.67	2015	78.0665	2015	100	2015
WaW_181	Japan	JPN	HIC	Kobe	JPN.13.22_1	2	1		FALSE	0.990379	2015	100	2015	13.4	2015			0	2015	14.89	2015	72.6028	2015	100	2015
WaW_182	Japan	JPN	HIC	Naha	JPN.32.21_1	2	1		FALSE	0.849925	2015	100	2015	31.5	2015			0	2015	15.01	2015	81.4956	2015	100	2015
WaW_183	Japan	JPN	HIC	Toyama	JPN.43.14_1	2	1		FALSE	1.06983	2015	100	2015	15.1	2015			0.394095	2015	24.28	2015	68.2143	2015	100	2015
WaW_184	Japan	JPN	HIC	Kitakyushu	JPN.7.25_1	2	1		FALSE	1.15354	2015	100	2015	8.70871	2015			0	2015	25.38	2015	64.9163	2015	100	2015
WaW_185	Japan	JPN	HIC	Yokohama	JPN.19.29_1	2	1		FALSE	0.868767	2015	100	2015	11.88	2015			0	2015	25.543	2015	65.5533	2015	100	2015
WaW_186	Jordan	JOR	UMC	Amman	JOR.2_1	1	1	Added to level 1 as population matched better than level 2	FALSE	1.13792	2015	100	2015	16	2015			0	2015	0	2015	0	2015	90	2015
WaW_187	Kazakhstan	KAZ	UMC	Atyrau	KAZ.4.1_1	2	1		FALSE	0.993029	2015	100	2015	8.3	2015			0	2015	0	2015	0	2015	0	2015
WaW_188	Kazakhstan	KAZ	UMC	Kostanay	KAZ.10.13_1	2	2	Data population lower than that of GIS data	FALSE			77
WaW_189	Kenya	KEN	LMC	Nairobi	KEN.30_1	1	1		FALSE	0.745246	2013	50	2013	16.1161	2013			0	2013	0	2013	0	2013	0	2013
WaW_190	Kenya	KEN	LMC	Eldoret	KEN.44_1	1	3	Data is believed to be at the city level. As such the population of the data is much lower than that of the County, however it is deemed a good match by area	TRUE			45	2005					0	2005	0	2005	0	2005	0	2005
WaW_191	Kiribati	KIR	LMC	South Tarawa	KIR	0	1		FALSE	0.5	2015	38	2015	6.59341	2015			0	2015	0	2015	0	2015	0	2015
WaW_192	South Korea	KOR	HIC	Seoul	KOR.16_1	1	1	Added to level 1 due to Seoul being a special administrative unit essentially acting as a municipality	FALSE	0.900529	2012			5.9	2012			29	2012	36	2012	8	2012	100	2012
WaW_193	Kosovo	XKO	LMC	Gjilan	XKO.2.1_1	2	1		FALSE	0.821781	2011							0	2011	0	2011	0	2011	0	2011
WaW_194	Kosovo	XKO	LMC	Pristina	XKO.5.7_1	2	1		FALSE	1.70813	2015	100	2015	14.78	2015			0	2015	0	2015	0	2015	88.8889	2015
WaW_195	Kuwait	KWT	HIC	Kuwait City	KWT	0	2	Population best matched with Level 0 therefore added to this level.	FALSE			100						0		0		0		0
WaW_196	Kyrgyzstan	KGZ	LMC	Bishkek	KGZ.2_1	1	1		FALSE	1.72524	2015	100	2015	7	2015
WaW_197	Kyrgyzstan	KGZ	LMC	Osh	KGZ.6_1	1	2	Data matches well but waste generation seems unreasonably high	FALSE	3.03906	2015	80	2015	13.1113	2015			0	2015	0	2015	0	2015	0	2015
WaW_198	Laos	LAO	LMC	Vientiane	LAO.13_1	1	1		FALSE	0.638917	2011	48	2011	12	2011			0	2011	0	2011	0	2011	55.5556	2011
WaW_199	Latvia	LVA	HIC	Liepaja	LVA.1.2_1	2	2	GIS population slightly bigger than data as covers larger area.	FALSE			95		9.09091
WaW_200	Latvia	LVA	HIC	Riga	LVA.3.3_1	2	2	GIS population slightly bigger than data as covers larger area.	FALSE	1.3301	2014
WaW_201	Lebanon	LBN	UMC	Beirut	LBN.3.1_1	2	1	Added to level 1 or 2 as best match/ Boundaries are the same across these levels	FALSE	1.01159	2015	100	2015	13	2015			10.5263	2015					97.5263	2015
WaW_202	Lebanon	LBN	UMC	Saida	LBN.8.3_1	2	2	Added to the Level 2 as this covers the majority of Saida.	FALSE	0.666667	2016	100	2016	17	2016			60	2016	20	2016	0	2016	0	2016
WaW_203	Liberia	LBR	LIC	Monrovia	LBR.11.2_1	2	1		FALSE	0.738636	2007	20	2007	11	2007
WaW_204	Libya	LBY	UMC	Tripoli	LBY.20_1	1	1		FALSE	0.64	2015	100	2015	18.6186	2015
WaW_205	Lithuania	LTU	HIC	Kaunas	LTU.2.4_1	2	1		FALSE	1.22307	2013	100	2013	19.6071	2013			0	2013	13	2013	0	2013	100	2013
WaW_206	Lithuania	LTU	HIC	Vilnius	LTU.10.6_1	2	1		FALSE	1.56437	2013	98	2013	9.91984	2013			0	2013	36	2013	0	2013	100	2013
WaW_207	Macedonia	MKD	UMC	Skopje	MKD.10_1	1	2	Skopje is split into several municipalities therefore this data was added to 'Cair' which is the centre most municipality covering the majority of the city. The GIS population is significantly smaller than the data point population as it appears the GIS population is not fully aligned with the city itself	FALSE	1.1317	2016	87.83	2016	12.4	2016			0	2016	0	2016	0	2016	97.9381	2016
WaW_208	Macedonia	MKD	UMC	Kratovo	MKD.37_1	1	1		FALSE	0.436127	2015			4.6	2015
WaW_209	Madagascar	MDG	LIC	Antananarivo	MDG.1.1.7_1+MDG.1.1.5_1+MDG.1.1.6_1+MDG.1.1.1_1	3	2	Data added to level 3 as matches boundaires of the city well, however there is a big difference in the population with the GIS population being much smaller. Also added the suburbs even though other Lv3 districts	FALSE	0.476221	2016	88.5	2016	11.0922	2016
WaW_210	Malawi	MWI	LIC	Blantyre	MWI.2.1_1	2	1		FALSE	0.390831	2013	30	2013
WaW_211	Malawi	MWI	LIC	Lilongwe	MWI.11.1_1	2	1		FALSE	0.356052	2013	30	2013
WaW_212	Malaysia	MYS	UMC	Kuala Lumpur	MYS.4.1_1	2	2	Data population much greater than GIS data as it likely represent the wider metropolitan area of Kuala Lumpur whereas the GADM Kuala Lumpur boundary (lv 2) represents only the Federal Territory of KL.	FALSE	0.801441	2016	80	2016	24.74	2016			0	2016	10.4	2016	0	2016	0	2016
WaW_216	Maldives	MDV	UMC	Maldives	MDV	0	3		FALSE	1.45073	2017	100	2017	9.27867	2017			0	2017	0	2017	0	2017	0	2017
WaW_217	Mali	MLI	LIC	Bamako	MLI.1.1.1_1	1 or 2 or 3	1		FALSE	0.820568	2008	57	2008	14.0351	2008
WaW_218	Mali	MLI	LIC	Sikasso	MLI.8.5_1	2	1	Added to Lv2 despite being a better fit for Lv3 as believed it is more likely the level at which waste is managed	FALSE	0.569498	2012	25	2012					0	2012	0	2012	0	2012	0	2012
WaW_219	Marshall Islands	MHL	UMC	Majuro	MHL	0	1		FALSE	0.891532	2013	66	2013	12.5	2013
WaW_220	Mauritania	MRT	LMC	Nouakchott	MRT.10.1_1	2	1		FALSE			15		21
WaW_221	Mexico	MEX	UMC	Guadalajara	MEX.14.43_1	2	1		FALSE	1.21739	2013	100	2013	18.96	2013									100	2013
WaW_222	Mexico	MEX	UMC	Mexico City	MEX.9_1	1	1	Added to level 1 as Mexico City is an autonomous region and the Level 1 boundary better fits the population and city boundaries	FALSE	1.47824	2015	98.54	2015	13.16	2015			12.7619	2015	14.19	2015			94.1859	2015
WaW_223	Mexico	MEX	UMC	Monterrey	MEX.19.39_1	2	2	Data population is bigger than GIS population as the GIS administrative boundary does not cover the entirity of the city.	FALSE	1.1452	2016	92.78	2016	16.1832	2016			0	2016	0	2016	0	2016	100	2016
WaW_224	Micronesia	FSM	LMC	Pohnpei	FSM.3_1	1	1		FALSE	0.451929	2012	80	2012	25	2012
WaW_225	Moldova	MDA	LMC	Soldanesti	MDA.30_1	1	2	GIS population much bigger than data as covers larger area.	FALSE	0.759482	2013	98	2013	9.10911	2013
WaW_226	Moldova	MDA	LMC	Chisinau	MDA.10_1	1	1		FALSE	0.981678	2015	100	2015	5	2015
WaW_227	Mongolia	MNG	LMC	Ulaanbaatar	MNG.21.1_1	2	1		FALSE	2.1886	2015	100	2015	18	2015			0	2015	0	2015	0	2015	0	2015
WaW_228	Montenegro	MNE	UMC	Podgorica	MNE.16_1	1	1		FALSE	1.81284	2013	69.7	2013	15.61	2013			0	2013	0	2013	0	2013	100	2013
WaW_229	Montenegro	MNE	UMC	Kotor	MNE.10_1	1	1		FALSE	1.23157	2013							0	2013	0	2013	0	2013	59.98	2013
WaW_230	Morocco	MAR	LMC	Rabat	MAR.11.2_1	2	1	Added to level 2 despite as better matched with city boundaries and population	FALSE	1	2014	90	2014											100	2014
WaW_231	Morocco	MAR	LMC	Tangier	MAR.14.4_1	2	3	City of Tangier is split into several administrative districts. This data was allocated to the Level 2 as closer match to population	FALSE	0.871731	2017	31	2017	11	2017			0	2017	0	2017	0	2017	0	2017
WaW_232	Morocco	MAR	LMC	Beni Mellal	MAR.13.2.6_1+MAR.13.2.1_1	3	3	City of Beni Mellal is split into 2 administrative districts. This data was allocated to theboth level 3 districts depsite it increasing the population more than the data suggests	FALSE	0.754214	2016			7	2016
WaW_233	Mozambique	MOZ	LIC	Maputo	MOZ.5.2_1	2	1		FALSE	1	2016	75	2016	10	2016			0	2016	0	2016	0	2016	0	2016
WaW_234	Myanmar	MMR	LMC	Yangon	MMR.15.4_1+MMR.15.1_1	2	2	Yangon split into two Level 2 districts. This data was added to both districts	FALSE	0.412536	2016			8	2016			0	2016	0	2016	0	2016	0	2016
WaW_235	Myanmar	MMR	LMC	Mandalay	MMR.8.2_1	2	2	GIS population much bigger than data as covers larger area.	FALSE	0.94	2017	80	2017	15	2017
WaW_236	Namibia	NAM	UMC	Windhoek	NAM.5.10_1+NAM.5.3_1+NAM.5.7_1+NAM.5.4_1+NAM.5.6_1+NAM.5.5_1+NAM.5.1_1+NAM.5.2_1+NAM.5.8_1	2	1	Windohoek is split into several districts. This data was added to all that cover the boundaries of the city	TRUE	0.752688	2000	93	2000	16	2000
WaW_237	Nepal	NPL	LIC	Kathmandu	NPL.1.1.3_1	3	1		FALSE	0.534653	2012	86.9	2012	20.14	2012			0	2012	0	2012	0	2012	100	2012
WaW_238	Nepal	NPL	LIC	Pokhara	NPL.5.2.2.32_1	4	1	There are two Pokhara's, this was added to PokharaN.P. as better match with city and population	FALSE	0.44194	2012	42.7	2012	9.92099	2012			0	2012	0	2012	0	2012	100	2012
WaW_239	Nepal	NPL	LIC	Lalitpur	NPL.1.1.5.27_1	4	1		FALSE	0.522207	2012	71.2	2012	15.5616	2012			0	2012	0	2012	0	2012	100	2012
WaW_240	Nepal	NPL	LIC	Biratnagar	NPL.2.1.3.13_1	4	1	Called BitartnagarN.P.	FALSE	0.332325	2012	85.7	2012	11.99	2012			0	2012	0	2012	0	2012	0	2012
WaW_241	Nepal	NPL	LIC	Bharatpur	NPL.1.3.2.5_1	4	1	There are three Bharatpur's this was added to BharatpurN.P. as better match with city and population	FALSE	0.400062	2012	25.4	2012	5.61	2012			0	2012	0	2012	0	2012	0	2012
WaW_242	Nepal	NPL	LIC	Birgunj	NPL.1.3.4.20_1	4	1		FALSE	0.698397	2012	39.3	2012	14.4629	2012			0	2012	0	2012	0	2012	0	2012
WaW_243	Nepal	NPL	LIC	Butwal	NPL.5.3.6.14_1	4	2	Data population is larger than GIS but area seems to match with city boundaries well. The difference in population is believed to come from innacuracy in the locaiton of the population distriution in GIS.	FALSE	0.357653	2012	62.7	2012	13.46	2012			0	2012	0	2012	0	2012	0	2012
WaW_244	Nepal	NPL	LIC	Dharan	NPL.2.1.5.18_1	4	2	Data population is higher than GIS but this is believed to be inaccuracies in the location of the population distribution in GIS dataset.	FALSE	0.618099	2012	68.7	2012	16.19	2012			0	2012	0	2012	0	2012	0	2012
WaW_245	Nepal	NPL	LIC	Bhaktapur	NPL.1.1.1.3_1	4	1		FALSE	0.399369	2012	86.5	2012	13.2387	2012			0	2012	0	2012	0	2012	0	2012
WaW_246	Nepal	NPL	LIC	Dhankuta	NPL.2.1.2.15_1	4	1	There are two Dhankuta's this was added to DhankutaN.P. as better match with city and population	FALSE	0.321694	2012	81.1	2012	17.85	2012			0	2012	0	2012	0	2012	100	2012
WaW_247	Nepal	NPL	LIC	Bhimeshwor	NPL.1.2.2.4_1	4	1	There is a Bhimeshwor and a BhimesworN.P.. This data was added to the latter as it covers the municipality of Bhimeswor and has a similar population.	FALSE	0.121695	2012			8.17	2012
WaW_248	Nepal	NPL	LIC	Badimalika	NPL.3.2.3.24_1	4	1	Called Martadi in GADM dataset	FALSE	0.131268	2016			6.87069	2016			0	2016	0	2016	0	2016	0	2016
WaW_249	Netherlands	NLD	HIC	Amsterdam	NLD.9.4_1	2	1		FALSE	1.11153	2013			6.4	2013			0	2013	14	2013	0	2013	0	2013
WaW_250	Netherlands	NLD	HIC	Eindhoven	NLD.8.21_1	2	1		FALSE					13.5922
WaW_251	New Zealand	NZL	HIC	Wellington	NZL.18.8_1	2	2	GIS population bigger than data. Data has some questionable values such as 38% plastic and 40% waste collection coverage	FALSE	2.16388	2010	40	2010	38	2010			1	2010	10	2010	0	2010	98.8764	2010
WaW_252	New Zealand	NZL	HIC	Auckland	NZL.1.1_1	2	1		FALSE	0.438356	2011			11.2	2011			0	2011	0	2011	0	2011	0	2011
WaW_253	Nicaragua	NIC	LMC	Managua	NIC.13.2_1	2	1		FALSE	1.28031	2012	82	2012	8.37	2012			0	2012	0	2012	0	2012	0	2012
WaW_254	Nicaragua	NIC	LMC	Puerto Cabezas	NIC.1.3_1	2	1		FALSE	0.587889	2012	23.65	2012	6.66667	2012			0	2012	0	2012	0	2012	0	2012
WaW_255	Niger	NER	LIC	Niamey	NER.5.1.1_1	3	1		TRUE	0.490196	2003	28	2003	2	2003			0	2003	0	2003	0	2003	0	2003
WaW_257	Nigeria	NGA	LMC	Lagos	NGA.25_1	1	2	Data added to Lagos State (lv 1) rather than default local authority level (Lv 2) as this data is for all of Lagos where the local authorities cover several different parts of the city. This provided a better match between the GIS population and data population, however the former is lsightly larger due to the state boundary covering some areas outside of the city.	FALSE	0.5	2014	10	2014	15	2014
WaW_258	Nigeria	NGA	LMC	Kano	NGA.20.21_1	2	3	Kano split into both a state, and several local authorities within the city. As no population provided it is unclear which administrative boundary to add it to, Kano (lv2) chosen however this only aligns with a small part of the city.	FALSE					4
WaW_259	Nigeria	NGA	LMC	Oyo	NGA.31.30_1	2	2	Oyo is split into Oyo East and Oyo West. This data was added to Oyo West as appears to cover more of the city and has a larger population, therefore better matching with the data.	FALSE	0.170169	2008			18.8	2008
WaW_260	Nigeria	NGA	LMC	Ibadan	NGA.31.6_1	2	2	Ibadan is split into several local authorities. This data was added to Ibadan North as this appeared to cover a larger are of the city and had the highest population.	FALSE	0.550546	2012	40	2012	9	2012			0	2012	0	2012	0	2012	0	2012
WaW_261	Northern Mariana Islands	MNP	HIC	Saipan	MNP.3_1	1	1		FALSE	1.81	2009
WaW_262	Norway	NOR	HIC	Oslo	NOR.12.1_1	2	2	Data population more than GIS population as likely covers wider metropolitan area of Oslo	FALSE	1.00274	2013	100	2013	5	2013			0	2013	37.197	2013	57.85	2013	99.8789	2013
WaW_263	Norway	NOR	HIC	Bergen	NOR.7.4_1	2	1		FALSE	0.710528	2014			8	2014			0	2014	46.4	2014	39.1	2014	100	2014
WaW_264	Oman	OMN	HIC	Muscat	OMN.11_1	1	2	Based on population this data does not seem to fit any of the default Level 2 Wilayat. It is instead added to level 1 Muscat province as seems a better match, the default remains level 2 as this is the municipality level	FALSE	0.71599	2017
WaW_265	Pakistan	PAK	LMC	Karachi	PAK.8.2_1	2	1	Added to level 2 despite default being level 3 as better matched data population	FALSE	0.832755	2016	60	2016	6.38086	2016			0	2016	0	2016	0	2016	60	2016
WaW_267	Pakistan	PAK	LMC	Sialkot	PAK.7.4.8_1	3	3	GIS population significantly more than data population but also covers area larger than the city	FALSE	0.42332	2010	25	2010	12.8	2010			0	2010	0	2010	0	2010	0	2010
WaW_268	Palau	PLW	HIC	Koror	PLW.6_1	1	1	Plastic seems very high	FALSE	0.319099	2010			48	2010
WaW_269	Panama	PAN	HIC	Panama City	PAN.12.6_1	2	1		FALSE	1.17365	2010	83.5	2010	12	2010			0	2010	2	2010	0	2010	66.3265	2010
WaW_270	Panama	PAN	HIC	San Miguelito	PAN.12.7_1	2	1		FALSE	1.00022	2010	97.5	2010					0	2010	0	2010	0	2010	100	2010
WaW_271	Panama	PAN	HIC	Colon	PAN.4.2_1	2	1		FALSE	0.874201	2010	74.8	2010					0	2010	0	2010	0	2010	0	2010
WaW_272	Papua New Guinea	PNG	LMC	Port Moresby	PNG.15.1_1	2	1		FALSE	0.852174	2016	63.26	2016	18.5	2016			0	2016	0	2016	0	2016	62.6246	2016
WaW_273	Paraguay	PRY	UMC	Asuncion	PRY.4.1_1	2	1		FALSE	1.5987	2010	92.2	2010	4.2	2010			0	2010	0	2010	0	2010	0	2010
WaW_274	Paraguay	PRY	UMC	Ciudad Del Este	PRY.2.1_1	2	1		FALSE	1.42239	2010	89.99	2010	10.2897	2010			0	2010	0	2010	0	2010	48.8	2010
WaW_275	Paraguay	PRY	UMC	San Lorenzo	PRY.9.15_1	2	1		FALSE	1.75259	2010	58.2	2010	12	2010			0	2010	0	2010	0	2010	0	2010
WaW_276	Peru	PER	UMC	Cusco	PER.8.7_1	2	1	Added to level 2 as better matches city boundaries	FALSE	1.19498	2011			11.63	2011			0	2011	0.3	2011	0	2011	0	2011
WaW_277	Philippines	PHL	LMC	Quezon City	PHL.47.14_1	2	1		FALSE	0.926316	2014	95	2014	9.63904	2014			0	2014	0	2014	0	2014	100	2014
WaW_278	Philippines	PHL	LMC	Cebu	PHL.25.17_1	2	1		FALSE	0.682557	2016	100	2016	15	2016			0	2016	0	2016	0	2016	40	2016
WaW_279	Poland	POL	HIC	Krakow	POL.6.6_1	2	1		FALSE	1.18466	2016			14.59	2016			0	2016	33	2016	0	2016	0	2016
WaW_280	Poland	POL	HIC	Lodzi	POL.3.7_1	2	1	Also called Lodz	FALSE	0.590383	2015
WaW_281	Portugal	PRT	HIC	Lisbon	PRT.12.7_1	2	1	Also called Lisboa	FALSE	1.56193	2014			13	2014			0	2014	21.8	2014	0	2014	0	2014
WaW_282	Portugal	PRT	HIC	Guimaraes	PRT.4.8_1	2	1		FALSE	0.970428	2015	100	2015	13.3024	2015
WaW_283	Qatar	QAT	HIC	Doha	QAT.1_1	1	1	Also called Ad Dawhah	FALSE	1.37	2015	100	2015
WaW_284	Romania	ROU	UMC	Bucharest	ROU.10.1_1	1 or 2	1	Also called Municipiul Bucuresti	FALSE	0.928202	2014	100	2014	9.42	2014					9.44	2014
WaW_285	Romania	ROU	UMC	Cluj-Napoca	ROU.14_1	1	1	Added to level 1 as believed to be level more likely at which waste is managed	FALSE	0.940003	2016	100	2016	9	2016
WaW_286	Russia	RUS	UMC	Kemerovo	RUS.27.10_1	2	1		FALSE	0.972803	2016			13	2016			0	2016	1.9	2016	0	2016	0	2016
WaW_287	Russia	RUS	UMC	Moscow	RUS.43_1	1	1	Added to level 1 as better fit	FALSE	1.31476	2011			13	2011			0	2011	0	2011	0	2011	0	2011
WaW_288	Russia	RUS	UMC	St petersburg	RUS.14.1_1	2	1		FALSE	1.26204	2013			5.8	2013			0	2013	0	2013	0	2013	0	2013
WaW_289	Rwanda	RWA	LIC	Kigali	RWA.5_1	1	1	Data added to level 1 as waste is managed at a different level in Kegali according to https://www.igi-global.com/gateway/chapter/240081	FALSE	1.9	2012	42	2012	1.50045	2012			0	2012	0	2012	0	2012	25	2012
WaW_290	Rwanda	RWA	LIC	Nyagatare	RWA.3.6_1	2	1		FALSE			29
WaW_291	Samoa	WSM	UMC	Upolu (Apia)	WSM.9_1	1	2	Slight mismatch between population of data and GIS due to it being unclear if the data is for the island of Upolu or the city Apia. Administrative boundaries do not match well with either.	FALSE			90		13.0452
WaW_292	Saudi Arabia	SAU	HIC	Jeddah	SAU.11_1	1	2	Data population is less than GIS due to GIS area being larger than city	FALSE	1.47875	2015	100	2015	16	2015
WaW_293	Saudi Arabia	SAU	HIC	Riyadh	SAU.7_1	1	1		FALSE	1.88383	2015			13.3	2015			0	2015	0	2015	0	2015	85	2015
WaW_294	Senegal	SEN	LIC	Rufisque	SEN.1.4.1_1	3	2	Data population is slightly more than GIS	TRUE	0.7	2004	36	2004
WaW_295	Serbia	SRB	UMC	Novi Sad	SRB.5.6_1	2	1		FALSE	1.05313	2012	100	2012	12.0824	2012			0	2012	0	2012	0	2012	0	2012
WaW_296	Serbia	SRB	UMC	Belgrade	SRB.3_1	1	1	Data added to level 1 as better match	FALSE	1.80913	2012	85	2012	14.9185	2012
WaW_297	Sierra Leone	SLE	LIC	Freetown	SLE.4.2.1_1	2 or 3	1		FALSE	0.56	2012	45	2012	9.24025	2012
WaW_298	Slovakia	SVK	HIC	Trnava	SVK.7.7_1	2	2	Data population smaller than GIS population as GIS area covers area bigger than just the city	FALSE	2.54241	2010			5.77942	2010			0	2010	9.79	2010	0.339962	2010	99.3769	2010
WaW_299	Slovakia	SVK	HIC	Bratislava	SVK.2_1	1	1	Data added to level 1 as better match	FALSE	0.926851	2013			8.80885	2013			0	2013	9.81	2013	41.02	2013	99.1255	2013
WaW_300	Slovenia	SVN	HIC	Ljubljana	SVN.7.14_1	2	1		FALSE	0.880615	2014	99	2014					0	2014	61	2014	0	2014	100	2014
WaW_301	Solomon Islands	SLB	LMC	Honiara	SLB.4_1	1	1		FALSE	1.01862	2014	60	2014	19.5	2014
WaW_302	Somalia	SOM	LIC	Hargeysa	SOM.18.3_1	2	1		FALSE	0.361084	2008			16	2008
WaW_303	South Africa	ZAF	UMC	Johannesburg	ZAF.3.1.1_1	2 or 3	1		FALSE	1.68132	2017	68.6	2017					5	2017	0	2017	0	2017	0	2017
WaW_304	South Africa	ZAF	UMC	Cape Town	ZAF.9.3.1_1	2 or 3	1		FALSE	1	2012			6	2012
WaW_306	South Africa	ZAF	UMC	Bloemfontein	ZAF.2.3.1_1	2 or 3	2	Also called Mangaung. GIS population slightly bigger due to coerving an area larger than just the city	FALSE					17.7				0		0		0		32.3
WaW_307	South Africa	ZAF	UMC	Durban	ZAF.4.2.1_1	2 or 3	1	Also called Ethekwini	FALSE	1.42192	2007			17.4	2007
WaW_308	South Sudan	SSD	LIC	Juba	SSD.1.1.1_1	1 or 2 or 3	1		FALSE	1.11	2013			20	2013
WaW_309	Spain	ESP	HIC	Madrid	ESP.8.1.3_1	3	1	Added to level 3 despite data fitting better at level 4 as it is believed most of Spain operates waste management at lv3 (comarca) level.	FALSE	2.29589	2014			10.4021	2014			15	2014	10	2014	10	2014	100	2014
WaW_310	Spain	ESP	HIC	Pamplona	ESP.9.1.9_1	3	1	Added to level 3 despite data fitting better at level 4 as it is believed most of Spain operates waste management at lv3 (comarca) level.	FALSE	1.9786	2014			8.19181	2014			0	2014	32	2014	0	2014	100	2014
WaW_311	Sri Lanka	LKA	LMC	Colombo	LKA.5.1_1	2	1		FALSE	2.43674	2016	93	2016	9.18164	2016			0.970291	2016	0	2016	0	2016	0	2016
WaW_312	Sri Lanka	LKA	LMC	Dehiwala-Mount Lavinia Municipal Council	LKA.5.2_1	2	1		FALSE	0.978495	2016	95.4	2016	10.5105	2016			0.539374	2016	0	2016	0	2016	0	2016
WaW_313	Sri Lanka	LKA	LMC	Moratuwa	LKA.5.9_1	2	1		FALSE	0.72716	2016	71	2016	10.5105	2016			18.7583	2016	0	2016	0	2016	79.0244	2016
WaW_314	Sri Lanka	LKA	LMC	Jaffna	LKA.9.4_1	2	1		FALSE	1.27127	2016	80.7	2016	4	2016			6.57016	2016	0	2016	0	2016	0	2016
WaW_315	Sri Lanka	LKA	LMC	Trincomalee	LKA.24.10_1	2	1		FALSE	1.23518	2016	65.6	2016	3	2016			5.83942	2016	0	2016	0	2016	0	2016
WaW_316	Sri Lanka	LKA	LMC	Kurunegala	LKA.14.15_1	2	1		FALSE	1.89872	2016	93.2	2016	6.19381	2016			3.14685	2016	0	2016	0	2016	0	2016
WaW_317	Sweden	SWE	HIC	Stockholm	SWE.15.18_1	2	1		FALSE	1.21813	2013	100	2013	10.1898	2013			0	2013	21	2013	71.0101	2013	100	2013
WaW_318	Sweden	SWE	HIC	Boras	SWE.21.6_1	2	1		FALSE	0.659085	2012	100	2012	7.04225	2012			0	2012	29	2012	54.6154	2012	100	2012
WaW_319	Switzerland	CHE	HIC	Bern	CHE.6.3_1	2	2	Data population bigger than GIS but areas seems to match	FALSE	0.451519	2016									43.22	2016
WaW_321	Syria	SYR	LIC	Damascus	SYR.5.1_1+SYR.13.6_1	2	2	Data population suggest this could be two level 2 areas of Damascus	FALSE	1.16913	2016			6.9	2016
WaW_322	Tajikistan	TJK	LIC	Dushanbe	TJK.1.1_1	2	1	Added to level 2 as better fit	FALSE	1.03637	2014	94.58	2014
WaW_323	Tajikistan	TJK	LIC	Khujand	TJK.4.3_1	2	1	Added to level 2 despite level 3 being a better population match, as matches the city boundaries better	FALSE	0.982946	2010	31.57	2010	10	2010
WaW_324	Tanzania	TZA	LIC	Dar Es Salaam	TZA.2_1	1	1	Data added to Level 1 despite default being level 2 as better matched data.	FALSE	0.939389	2011	49	2011	1.99402	2011									57.5071	2011
WaW_325	Tanzania	TZA	LIC	Moshi	TZA.9.3_1	2	1		FALSE	0.92633	2008	61	2008	9	2008			28.9855	2008	0	2008	0	2008	100	2008
WaW_326	Tanzania	TZA	LIC	Mountain Kilimanjaro	TZA.9.5_1	2	2	Data added to Rombo district as this incorpotates the peak of Mount Kilimanjaro however unclear if the data is for only this area.	FALSE	0.652316	2006			24	2006
WaW_327	Thailand	THA	UMC	Bangkok	THA.3_1	1	1	Added to level 1 despite default being level 3 as better fit	FALSE	1.23834	2015	100	2015	25.0125	2015			55.2467	2015					100	2015
WaW_328	Timor-Leste	TLS	LMC	Dili	TLS.7_1	1	1		FALSE	0.64012	2016			17.8218	2016
WaW_329	Togo	TGO	LIC	Lome	TGO.3.1_1	2	2	Data population lower than GIS but reasonable match	FALSE	0.891271	2014	64	2014	0	2014
WaW_330	Tonga	TON	UMC	Vavau	TON.5_1	1	1		FALSE	1.01162	2012			13.4	2012			1.5	2012	5.1	2012	0	2012	29.3362	2012
WaW_331	Tonga	TON	UMC	Tongatapu	TON.4_1	1	1		FALSE	1.08364	2012	40	2012	13.4	2012
WaW_332	Tunisia	TUN	LMC	Sfax	TUN.17_1	1	2	Data added to Level 1 as better matched data	FALSE	0.703196	2013			11	2013									100	2013
WaW_333	Tunisia	TUN	LMC	Tunis	TUN.23_1	1	2	Data added to Level 1 as better matched data	FALSE	0.861057	2012	61	2012	10.1055	2012									95.7542	2012
WaW_334	Tunisia	TUN	LMC	Sousse	TUN.20_1	1	2	Data added to Level 1 as better matched data	FALSE	1.12812	2008	99	2008	9	2008			0	2008	0	2008	0	2008	100	2008
WaW_335	Turkey	TUR	UMC	Sakarya Mm	TUR.66_1	1	1	Data is for the metropolitan municipality which is at provincial level (Lv1)	FALSE	1.06	2014			15.8841	2014					2.49	2014
WaW_336	Turkey	TUR	UMC	Bursa Metropolitan Municipality	TUR.21_1	1	1	Data is for the metropolitan municipality which is at provincial level (Lv1)	FALSE	1.06	2014			15.4845	2014
WaW_337	Turkmenistan	TKM	UMC	Ashgabat	TKM.2_1	1	1		FALSE	0.602299	2012			3	2012
WaW_338	Tuvalu	TUV	UMC	Funafuti	TUV.1_1	1	1		FALSE			80		9.30931
WaW_339	Uganda	UGA	LIC	Kampala	UGA.16.1_1	2	1		FALSE	1.18872	2014	65	2014	1.5984	2014			0	2014	0	2014	0	2014	100	2014
WaW_340	Ukraine	UKR	LMC	Kiev	UKR.11_1	1	1	Data added to regional level (Lv 1) despite default being level 2 as better matched with the city (Kiev is an independent city at the regional level)	FALSE	1.02437	2016			7	2016			0	2016	0	2016	24.5726	2016	0	2016
WaW_341	Ukraine	UKR	LMC	Pavlograd	UKR.5.17_1	2	1		FALSE	2.1093	2012	100	2012	12.5874	2012
WaW_342	United Arab Emirates	ARE	HIC	Abu Dhabi	ARE.1_1	1	2	Population of data is less than GIS	FALSE	2.47303	2015	100	2015	19	2015			9	2015	20	2015	0	2015	12.6761	2015
WaW_343	United Arab Emirates	ARE	HIC	Dubai	ARE.3_1	1	2	Population of data is less than GIS	FALSE	3.05149	2011	100	2011	24.247	2011			0	2011	25	2011	0	2011	100	2011
WaW_344	United Kingdom	GBR	HIC	London	GBR.1.36_1	2	1	The data for london is given at level 2 therefore added to this level.	FALSE	1.20562	2012	99	2012	6	2012			0	2012	30	2012	46.338	2012	100	2012
WaW_345	United Kingdom	GBR	HIC	Bristol	GBR.1.12.1_1	3	1		FALSE	1.01223	2015	100	2015	11.1111	2015			25.3	2015	45.03	2015	0	2015	100	2015
WaW_346	United States	USA	HIC	Washington Dc	USA.9.1_1	2	1	Also called District of Columbia	FALSE	1.89471	2016			0	2016			33	2016	11	2016	0	2016	100	2016
WaW_347	United States	USA	HIC	Ann Arbor	USA.23.85_1	2	1	Added to the Level 2 'Washtenaw' county	FALSE	1.79169	2012									31	2012
WaW_348	United States	USA	HIC	Seattle	USA.48.17_1	2	2	Also called 'King' in Washington State. Data population is significantly less than GIS population as GIS vector covers larger area	FALSE	3.12834	2015	100	2015	11.523	2015			0	2015	58.04	2015	0	2015	100	2015
WaW_349	Uruguay	URY	HIC	Montevideo	URY.10_1	1	1		FALSE	1.00068	2012	100	2012	15.8716	2012			0	2012	29	2012	0	2012	100	2012
WaW_351	Uzbekistan	UZB	LMC	Tashkent	UZB.13.1_1	2	2	Population data is much bigger than GIS data. This appears to be due to the GIS population raster not aligning correctly with the boundary of the city.	FALSE	0.608558	2012			0	2012
WaW_352	Vanuatu	VUT	LMC	Port Vila	VUT.4_1	1	1	Data better matches level 2 but added at level 1 as more likely waste is managed at an iland level	FALSE	1.67971	2012	60	2012	7.9	2012
WaW_353	Venezuela	VEN	UMC	Caracas	VEN.11.1_1	2	2	Also called 'Libertador' in 'Distrito Capital'. Data population is greater than GIS population but good match in area	FALSE	1.52101	2010	100	2010	0	2010			0	2010	0.9	2010	0	2010	100	2010
WaW_354	Vietnam	VNM	LMC	Hanoi	VNM.27_1	1	2	Data population much smaller than GIS population due to GIS vector covering area larger than just the city.	FALSE	1.8049	2014	92	2014	8.61723	2014			2.44051	2014					84.264	2014
WaW_355	Vietnam	VNM	LMC	Ho Chi Minh City	VNM.25_1	1	1		FALSE	0.891192	2014	97	2014	15.8259	2014			15	2014	0	2014	0	2014	100	2014
WaW_357	Yemen	YEM	LIC	Sanaa	YEM.9_1	1	1	The municipality of the Capital Sana'a is called Amanat Al Asimah	FALSE	0.857143	2016	70	2016	10	2016			0	2016	0	2016	0	2016	100	2016
WaW_358	Zambia	ZMB	LMC	Lusaka	ZMB.5.4_1	2	1		FALSE	0.844709	2011	45	2011	7	2011			0	2011	0	2011	0	2011	27.6596	2011
WaW_359	Zambia	ZMB	LMC	Ndola	ZMB.2.10_1	2	1		FALSE	0.52	2012			8.33083	2012
WaW_360	Zimbabwe	ZWE	LIC	Harare	ZWE.2.1_1	2	2	Data population lower than GIS but area matches well with the city boundaries	TRUE	0.721649	2000	97	2000	18.1745	2000
WaW_361	Zimbabwe	ZWE	LIC	Gweru	ZWE.10.4_1	2	2	Data population lower than GIS due to GIS vector coverin area larger than the city boundaries	FALSE	0.664176	2014	99	2014	10.2	2014
WaW_362	Zimbabwe	ZWE	LIC	Chinhoyi	ZWE.6.5_1	2	2	Within Makonde District. Data population lower than GIS due to GIS vector coverin area larger than the city boundaries	FALSE	0.712329	2012	50	2012	8.6	2012
WaW_363	Zimbabwe	ZWE	LIC	Norton	ZWE.6.1_1	2	2	Within Chugutu District. Data population lower than GIS due to GIS vector coverin area larger than the city boundaries	FALSE	0.657534	2012			9.1	2012
WaW_364	Zimbabwe	ZWE	LIC	Kariba	ZWE.6.4_1	2	2	Data population lower than GIS due to GIS vector coverin area larger than the city boundaries	FALSE	0.767123	2012			11	2012
WaW_365	Zimbabwe	ZWE	LIC	Kadoma City	ZWE.6.3_1	2	3	Population not listed to cross check, but believed to be allocated correctly	FALSE					7
WaW_367	Zimbabwe	ZWE	LIC	Masvingo City	ZWE.7.5_1	2	3	Population not listed to cross check, but believed to be allocated correctly	FALSE					40
WaW_368	Zimbabwe	ZWE	LIC	Sakubva	ZWE.3.5_1	2	3	Within Mutare City and District. Population not listed to cross check, but believed to be allocated correctly.	FALSE					23
UNSD_001	Algeria	DZA	UMC	Adrar	DZA.1_1	1	1	Combined pops of level 2 administrative constitiuents are roughly 550K in 2020 which is a pluasible match for the 510k stated in w2017 here	FALSE	0.499597	2017	12	2015					1.09091	2015	0	2015	0	2015	43.9024	2015
UNSD_002	Algeria	DZA	UMC	Djelfa	DZA.16_1	1	1	Pop is close - looks like L1	FALSE	0.752511	2017	100	2017					1	2015	0	2015	0	2015	43.9024	2015
UNSD_003	Algeria	DZA	UMC	Algiers	DZA.4_1	1	1	Although 2020 pop. = 4.35 million, this still seems a plausible fit as the census in 2007 said 3.4 million https://web.archive.org/web/20070930225838/http://www.world-gazetteer.com/wg.php?x=&men=gadm&lng=en&dat=32&geo=-66&srt=npan&col=aohdq	FALSE	0.940392	2017	100	2017					1	2015	0	2015	0	2015	43.9024	2015
UNSD_004	Algeria	DZA	UMC	Wahran (Oran)	DZA.32_1	1	1	Pop is close - looks like L1	FALSE	0.854854	2017	70	2015					1	2015	0	2015	0	2015	43.9103	2015
UNSD_005	Algeria	DZA	UMC	Qacentina (Constantine)	DZA.15_1	1	1	Pop in 2020 is 1.25million - close enough	FALSE	0.801755	2017	80	2015					1	2015	0	2015	0	2015	44.0758	2015
UNSD_006	Argentina	ARG	UMC	La Matanza	ARG.1.62_1	2	1	Pop is 2.415 million in 2020 - plausible increase from 2010	FALSE			91.9	2010
UNSD_007	Argentina	ARG	UMC	Córdoba	ARG.6_1	1	1	Pop is 3.6 million in 2020 - most plasible as city alone is only 1.3	FALSE			93	2010
UNSD_008	Argentina	ARG	UMC	Buenos Aires	ARG.5_1	1	1	Must be the Ciudad de Buenos Aires which is 3 million inj 2020 - a plausible increase	FALSE			97.7	2010
UNSD_009	Armenia	ARM	UMC	Gyumri	ARM.8_1	1	2	no area with tbis name so this is the larger region containing it (no smaller levels). 220k pop likely due to the larger area	FALSE	0.257607	2019	100	2019					0	2019	0	2019	0	2019	100	2019
UNSD_010	Armenia	ARM	HIC	Vanadzor	ARM.7_1	1	2	larger area that contains vandazor but is wider with pop of 191k	FALSE	0.161989	2019	100	2019					0	2019	0	2019	0	2019	100	2019
UNSD_011	Armenia	ARM	HIC	Yerevan	ARM.4_1	1	1	2020 pop is 998K on the GIS - so plausibly the same place	FALSE	0.818692	2019	100	2019					0	2019	0	2019	0	2019	100	2019
UNSD_012	Azerbaijan	AZE	UMC	Baku	AZE.1.2_1	2	1	Pop is very plausibly similar to city with same name	FALSE									6.27581	2019	0	2019	44.7564	2019	42.1585	2019
UNSD_013	Azerbaijan	AZE	UMC	Ganja	AZE.4.4_1	2	1	GIS pop is a bit low at 306K in 2020 - but still looks like a good fit	FALSE									0	2017	0	2017	0	2017	0	2017
UNSD_014	Azerbaijan	AZE	UMC	Sumgaitww.	AZE.1.3_1	2	1	Again GIS pop is a bit low at 330K in 2020 - butooks like a good fit as above	FALSE									0	2017	0	2017	0	2017	0	2017
UNSD_015	Belarus	BLR	UMC	Minsk	BLR.5.11_1	2	1	GIS pop is v close (2.15) in 2020 - the full level 1 area is 0.5 million greater	FALSE	1.06103	2019	100	2019					0	2019	26.0026	2019	0	2019	100	2019
UNSD_016	Bhutan	BTN	LMC	Thimphu	BTN.14_1	1	3	130k on GIS, not sure on this one because the area seems to cover the town but cantr see reason for the large difference in pop	FALSE	2.3893	2017	80	2019					10	2017	0	2017	0	2017	0	2017
UNSD_018	Bosnia and Herzegovina	BIH	UMC	Zenica	BIH.2.10.10_1	3	1	GIS pop is 107k in 2020 (118K on nthe map - is plausible	FALSE	0.692247	2009	85	2009					4.0293	2009	0	2009	0	2009	100	2009
UNSD_019	Bosnia and Herzegovina	BIH	UMC	Sarajevo	BIH.2.6_1	2	1	GIS pop in 2020 is 397k - a bit less than reported here fopr 2009	FALSE									0	2015	0	2015	0	2015	100	2015
UNSD_020	Botswana	BWA	UMC	Gaborone	BWA.4_1	1	2	GIS pop is circa 60K and surrounding polygons can't be obviously summed to make up the 264K - suspect a larger metropplitan area exists not seen on the GIS dataset	FALSE	0.807118	2017	100	2017					0	2017	0	2017	0	2017	0	2017
UNSD_021	Botswana	BWA	UMC	Francistown	BWA.3_1	1	1	near enough for Jazz	FALSE	2.15372	2017	100	2017					0	2017	0	2017	0	2017	0	2017
UNSD_022	Brazil	BRA	UMC	Brasília	BRA.7.1_1	2	1	familiar with these - they look good	FALSE	1.60222	2014	99	2015					4.21778	2015	0	2015	0	2015	100	2015
UNSD_023	Brazil	BRA	UMC	Salvador	BRA.5.336_1	2	1	familiar with these - they look good	FALSE	0.914177	2012	96.7	2015					0.0104426	2009	0	2012	0.00224478	2012	0	2012
UNSD_024	Brazil	BRA	UMC	São Paulo	BRA.25.564_1	2	1	familiar with these - they look good	FALSE	1.23042	2014	100	2015					0.0543053	2014
UNSD_025	Brazil	BRA	UMC	Rio de Janeiro	BRA.19.67_1	2	1	familiar with these - they look good	FALSE	1.41133	2014	100	2015					0.0552967	2015	0.0913465	2015	0	2015	0	2015
UNSD_026	Brazil	BRA	UMC	Porto Alegre	BRA.21.305_1	2	1	familiar with these - they look good	FALSE	1.11897	2014	100	2015					0.267003	2015	0	2015	0	2015	0	2015
UNSD_027	Burkina Faso	BFA	LIC	Ouagadougou	BFA.7.1_1	2	2	Data matches Lv 2 & 3 reasonably well, perhaps slightly better match at lv3 but believed Lv2 is more likely to represent the level at which waste is managed so chosen instead	FALSE			81	2014
UNSD_028	Burundi	BDI	LIC	Bujumbura	BDI.2_1	1	3	Bujumbura is a port city, two parts main city is bujumbura marine surrounded by bujumbura rural. Marine has pop of 890k. Could be plausible increase given the longer time frame. Google says 374k pop 2021 though so seems a bit confusing. Other data says 412k	FALSE									0	2017	0	2017	0	2017	0	2017
UNSD_029	Cape Verde	CPV	LMC	São Vicente	CPV.20_1	1	1	GIS says 81K in 2020 - near enough for Jazz	FALSE	1.27114	2015	100	2015					0	2015	0	2015	0	2015	0	2015
UNSD_030	Cape Verde	CPV	LMC	Sal	CPV.11_1	1	2	22k pop on GIS but is the correct island	FALSE	0.983899	2015	99.8	2015					0	2015	0	2015	0	2015	100	2015
UNSD_031	Cape Verde	CPV	LMC	Praia	CPV.7_1	1	1		FALSE	0.734456	2019	100	2019					0	2015	0	2015	0	2015
UNSD_032	Cameroon	CMR	LMC	Douala	CMR.5.4_1	2	1	pop of 3.4 million GIS seems the best cover of the area	FALSE			58.33	2009					0	2009	0	2009	0	2009	98.3639	2009
UNSD_033	Central African Republic	CAF	LIC	Bangui	CAF.2.1_1	2	3	only covers a small part of the city so this has caused GIS to be 277k pop much lower. Level one and two are the same so use 2 as default	FALSE	0.327789	2009	32	2009
UNSD_034	Chad	TCD	LIC	N'Djamena	TCD.22_1	1	2	2020 pop is 1.4 million - on the GIS - is a steep but plausible increase in a decade	FALSE	0.739726	2009	45	2009					0	2009	0	2009	0	2009	0	2009
UNSD_035	China	CHN	UMC	Shanghai	CHN.24.1_1	2	2	GIS says 32 mill pop google says 26mill, GIS looks like a slightly larger area, but covers the whole of shanghai	FALSE									5.7021	2019	0	2019	65.6275	2019	0	2019
UNSD_036	China	CHN	UMC	Chongqing	CHN.3.1_1	2	2	Population best matches with Lv 2 but GADM boundary much bigger than city	FALSE									0.714523	2019	0	2019	50.5816	2019	0	2019
UNSD_037	China	CHN	UMC	Beijing (Peking)	CHN.2.1_1	2	2	28.5mill pop GIS, bit of a big gap but seems to be in the right place maybe boundry a bit wide	FALSE									16.8117	2019	0	2019	48.9419	2019	0	2019
UNSD_038	Hong Kong	HKG	HIC	Hong Kong	HKG	0	1	Controversially, country level 0 is close (7.121 million in 2020)	FALSE	2.13115	2014	100	2015					0	2015	35.4119	2015	0	2015	0	2015
UNSD_039	Macao	MAC	HIC	Macao	MAC	0	1	Controversially, country level 0 is close (600K in 2020)	FALSE	2.04957	2014	100	2015							0.597725	2015	77.1683	2015	100	2017
UNSD_040	Costa Rica	CRI	UMC	San José	CRI.7.15_1	2	3	199k on GIS. GIS area seems to cover only part of san jose but is more representative than the level 1.	FALSE	1.08035	2008	100	2008					0	2007	0	2007	0	2007	100	2007
UNSD_041	Croatia	HRV	HIC	Rijeka	HRV.13.34_1	2	1	107k on GIS 2020 seems okay as a change and is in the right place	FALSE	0.590246	2012	100	2012					0	2012	23.627	2012	0	2012	100	2012
UNSD_042	Croatia	HRV	HIC	Split	HRV.16.43_1	2	1	has 157K on GIS in 2020 which is pl;ausible	FALSE	0.894218	2012	100	2012					0	2012	1.30846	2012	0	2012	100	2012
UNSD_043	Croatia	HRV	HIC	Zagreb	HRV.4.7_1	2	1	has 794 in 202 which is a plausible increase	FALSE	1.02406	2012	100	2012					6.07972	2012	2.33158	2012	0	2012	100	2012
UNSD_044	Cuba	CUB	UMC	Camagüey	CUB.1.1_1	2	1	has 323K in 2020 which is a plausible increase	FALSE	1.92434	2017	100	2017					0.976744	2017	3.86047	2017	0	2017	100	2017
UNSD_045	Cuba	CUB	UMC	Habana	CUB.4_1	1	1	GIS nearly 2 mill for Cuidad de la Habana (province). Note: La Habana (bordering province) 377k so this Habana could be an addition of both but not certain so assume cuidad de la Habana as more than 90% of the popualtion	FALSE	2.38676	2017	100	2017					0	2017	0	2017	0	2017	100	2017
UNSD_046	Dominican Republic	DOM	UMC	Pedro Brand	DOM.31.4_1	2	1	GIS says 98K nearly 50% greater , however dat is older- this a suburb of a big city so potential inaccuracy in GIS data distribution	FALSE	0.49202	2010	72.77	2010					0	2015	0	2015	0	2015	100	2015
UNSD_047	Dominican Republic	DOM	UMC	Los Alcarrizos	DOM.31.3_1	2	1	Matches perfectly with the area shown by google when searched for	FALSE	0.609798	2010	82	2010					0	2015	0	2015	0	2015	100	2015
UNSD_048	Dominican Republic	DOM	UMC	Santo Domingo Oeste	DOM.31.7_1	2	2	GIS population slightly higher but possible	FALSE	0.983376	2010	91.16	2010					0	2015	0	2015	0	2015	100	2015
UNSD_049	Dominican Republic	DOM	UMC	Santo Domingo Norte	DOM.31.6_1	2	2	GIS is 887k seems a large increase could be due to it being the suburb of a big city	FALSE	0.67774	2010	76.91	2010					0	2015	0	2015	0	2015	100	2015
UNSD_050	Dominican Republic	DOM	UMC	Santiago De Los Caballeros	DOM.30.6_1	2	2	GIS is 803k looks as though the boundry spreads beyond the border of the main city may be thee reason for this increase	FALSE			87.34	2010
UNSD_051	Dominican Republic	DOM	UMC	San Pedro De Macoris	DOM.27.6_1	2	1	GIS is 277k k seems a large increase but the boundry does spread a lot wider than the central area	FALSE			86.96	2010
UNSD_052	Dominican Republic	DOM	UMC	Santo Domingo Este	DOM.31.5_1	2	1	1.17 mill on GIS seems plausible	FALSE	1.09189	2010	82.15	2010					0	2015	0	2015	0	2015	100	2015
UNSD_053	Dominican Republic	DOM	UMC	Distrito Nacional (Capital de la República)	DOM.5.1_1	2	1		FALSE	2.29717	2010	92	2010					0	2015	0	2015	0	2015	100	2015
UNSD_054	Ecuador	ECU	UMC	Quito	ECU.19.6_1	2	1	Slightly better match at Lv3 but Lv2 more likely to represent level at which waste is managed so chosen here instead	FALSE	1.20583	2017	95.8056	2017							0.857507	2012
UNSD_055	Ecuador	ECU	UMC	Guayaquil	ECU.10.11_1	2	1	Reasonable population match	FALSE	1.3206	2017	96.3408	2017
UNSD_056	Ecuador	ECU	UMC	Cuenca	ECU.1.3_1	2	1	Slightly better match at Lv3 but Lv2 more likely to represent level at which waste is managed so chosen here instead	FALSE	0.827862	2017	96.7746	2017							0.496976	2012
UNSD_057	Gambia	GMB	LIC	Banjul	GMB.1.2_1	2	2	28k on GIS in 2020 since the sata set is from 2009 this may be plausble. Also the L1 city is made of 2 districts (banjul and Kanifing), perhaps the boundry could have changed/ large areas of the land seem uninhabited/flood prone	FALSE									0	2009	0	2009	0	2009	0	2009
UNSD_058	Georgia	GEO	LMC	Kutaisi	GEO.4.5_1	2	3	92k on GIS in 2020 this seems a large reduction. Looks as though the area does not cover the majority of the city and quite dense populations on the outer boundry of the area, need to check	FALSE			95	2007
UNSD_059	Georgia	GEO	LMC	Batumi	GEO.2.1_1	2	1	198k GIS seems plausible increase	FALSE	1.28951	2017	98.7	2017					0	2017	0	2017	0	2017	100	2017
UNSD_060	Georgia	GEO	LMC	Tbilisi	GEO.12.1_1	2	1	1.05 mill GIS within 10% decrease so seems plausible	FALSE	0.950746	2017	100	2017					0	2017	0	2017	0	2017	100	2017
UNSD_061	Ghana	GHA	LMC	Tamale	GHA.6.13_1	2	2	409k in GIS this is a lot higher, the area on map seems to cover much more than the city itself.	FALSE	0.5	2017	70	2017					3.33468	2016	0	2017	0	2017	100	2017
UNSD_062	Ghana	GHA	LMC	Kumasi	GHA.1.16_1	2	2	3.36mill pop on GIS this is the right area but the boundry seems to include a lot of the surrounding areas of the city that are densly populated perhaps the 2mill is only for the cental area??	FALSE	0.75	2017	85	2017					0	2017	0	2017	0	2017	85	2017
UNSD_063	Ghana	GHA	LMC	Accr	GHA.5.1_1	2	2	Pressume this is Accra not Accr. 3.15 mill in 2020 which seems a lot higher. Probably includes more than just accrra city but would be hard to determine which level 3s as would be a combination	FALSE	0.7	2017	80	2017					8.27049	2016	0	2017	0	2017	0	2017
UNSD_064	Guatemala	GTM	LMC	Escuintla	GTM.6.1_1	2	1	176k seems a plausible increase.	FALSE			50	2012					0	2012	0	2012	0	2012	50	2012
UNSD_065	Guatemala	GTM	LMC	Cobán	GTM.1.3_1	2	3	312k on GIS much much smaller 2018 census says around 200k pop. Coban is in level 1 area Alta Verapaz with 1.46mill pop on GIS could be a combination of this and another area surrounding coban ? Have put the unique ID as the level 2 because this covers the area of ther city best	FALSE			19.51	2012					0	2012	0	2012	0	2012	83.3333	2012
UNSD_066	Guatemala	GTM	LMC	Villa Nueva	GTM.7.16_1	2	3	629k on GIS 2020, this was 2009 but still seems a very large increase. Area is surrounded by lots of smaller districts and seems to be on the edge of guatemala city itself. Perhaps some boundries have chanaged?	FALSE			85.4	2006
UNSD_067	Guatemala	GTM	LMC	Mixco	GTM.7.5_1	2	1	507k on GIS 2020 seems a reasonable increase	FALSE			82.2	2006
UNSD_068	Guatemala	GTM	LMC	Huehuetenango	GTM.8.10_1	2	2	GIS population smaller but covers the city	FALSE			35	2009					0	2009	0	2009	0	2009	100	2009
UNSD_069	Guatemala	GTM	LMC	Quetzaltenango	GTM.13.16_1	2	1		FALSE	1.19504	2012	95	2012					0	2012	0	2012	0	2012	0	2012
UNSD_070	Guatemala	GTM	LMC	Guatemala	GTM.7_1	1	3	City split into many disticts in lv2 but encompasses much larger area in lv1. Level 1 thought to be closest match	FALSE			85	2006
UNSD_071	Guinea	GIN	LIC	Conakry	GIN.2.1_1	2	3	the GIS says 2020 pop is 1.9 mill. It looks as though there is a very dense population around the north side of the area so UN boundry could be different. Also the level 1 and level 2 are the same ( level 1 is the region, level 2 is the prefecture ) level 2 is default so this is used	FALSE	0.241758	2007	76	2007					0	2007	0	2007	0	2007	0	2007
UNSD_072	Guyana	GUY	LMC	Georgetown	GUY.3_1	1	2	Chose level 1 as most likely level at which waste is managed	FALSE			95	2009					0	2009	0	2009	0	2009	100	2009
UNSD_073	Iran	IRN	UMC	Tabriz	IRN.5.12_1	2	2	1.3 mill 2020 pop in GIS. The boundry seems to miss the east side of the city which explains the decrease	FALSE	0.720715	2017	100	2017					0	2017			0	2017
UNSD_074	Iran	IRN	UMC	Tehran	IRN.28.8_1	2	1	Tehran is level 1 and has population of nearly 12 mill in 2020 (GIS). I think it is more likely that this is refering to Theran (central Terhan level 2) which has 2020 pop of 7.2 mill on GIS. Previous data feom waste sources calcuated pop of 8.4 mill also.	FALSE	3.04212	2017	90	2017					4.55063	2017
UNSD_075	Iran	IRN	UMC	Mashhad	IRN.24.9_1	2	1	3.5 mill pop in 2020 on GIS seems plausible	FALSE	0.788056	2017	100	2017					13.4441	2017	0	2017	0	2017	100	2017
UNSD_076	Iran	IRN	UMC	Esfahan	IRN.6.16_1	2	2	Esfahan L1 is pop 5.6 mill on GIS this looks like the entire province. The county of tiran and karvan has pop of 2.5 mill on GIS and this covers a lot of central Esfahan.	FALSE	0.63337	2017	100	2017					30.8824	2017	6.72269	2017	0	2017	60.1594	2017
UNSD_077	Iraq	IRQ	UMC	Mosul	IRQ.16.6_1	2	2	2.6 mill pop on GIS boundry seems to cut through city centre a little so may be the reason for the under eastimate	FALSE	1.14674	2019	53.3	2019
UNSD_078	Iraq	IRQ	UMC	Baghdad	IRQ.10_1	2	2	GIS has population as 5 mill seems like there are some very densly populated areas on the outskirts of the city not within this boundry. Previous data from waste sources estimates 7 mill pop.	FALSE	1.23688	2019	81.5	2019
UNSD_079	Israel	ISR	HIC	Jerusalem	ISR.6_1	1	2	GIS estimates 1.2 mill pop boundry stretches much further than that of the main city- could explain the increase also 2008 is a much larger gap to 2020 than others	FALSE									0	2009	4.99894	2009	0	2009	100	2009
UNSD_080	Israel	ISR	HIC	Tel Aviv-Yafo	ISR.7_1	1	3	GIS is 1.5 mil pop and previous data from waste sources 3.3 mill. Internet says pop of 435k in 2015. the GIS does include a slightly larger area than google maps but this is such a big change it is still confusing	FALSE									0	2009	10.6205	2009	0	2009	100	2009
UNSD_081	Jordan	JOR	UMC	Zarqa	JOR.12_1	1	2	on GIS pop 893k slightly too large a jump but likely explained by the boundry of Zarqa being next to the city Amman and dense population spreads between the two	FALSE									0	2017	0	2017	0	2017	0	2017
UNSD_082	Jordan	JOR	UMC	Irbid	JOR.5_1	1	2	1.4 mill on GIS could possibly include Ajlun which borders the area and has pop n193k but not sure	FALSE									0	2017	0	2017	0	2017	0	2017
UNSD_083	Jordan	JOR	UMC	Amman	JOR.2_1	1	2	2.5 mill pop on GIS 2.4 mill on data from waste sources but 4,5 mill in 2016 cencus seems the dense population spreads further than the GIS boundry but this is quite a large change but seems to cover the correct place- best match	FALSE									0	2017	0	2017	0	2017	0	2017
UNSD_084	Kazakhstan	KAZ	UMC	Astana	KAZ.2.14_1	2	1	As of 2019, Astana is now known as Nur-sultan. Previously it was also known as Akmola which is now the name of the region it is in. this can also be callled Aqmola and this is the GIS location name for the level 1. Nur-sultan is in the level 2 area Tselinogradskiy, which has 2020 GIS pop of 1.3 mill which is a plausible increase	FALSE	0.764477	2019	100	2019					70.8212	2018	16.4096	2019	0	2019	11.4815	2019
UNSD_085	Kazakhstan	KAZ	UMC	Almaty	KAZ.1.3_1	2	1	1.6 mill pop on GIS boundry cuts out a small part of the city plausible population	FALSE	0.711758	2019	100	2019					3.74947	2018	10.2062	2019	0	2019	0	2019
UNSD_086	Kenya	KEN	LMC	Nairobi	KEN.30_1	1	1	4.9 mill pop on GIS plausible increase	FALSE	0.499997	2017	44	2012					0	2017	0	2017	0	2017	0	2017
UNSD_087	Kyrgyzstan	KGZ	LMC	Bishkek	KGZ.2_1	1 or 2	1	L1 mand L2 are the same. 988K pop on GIS plausible increase	FALSE	0.911091	2017	100	2017					0	2017	0	2017	0	2017	100	2017
UNSD_088	Lebanon	LBN	UMC	Tripoli	LBN.7.5_1	2	1	412k pop on GIS seems plausible increase	FALSE	0.947797	2012	100	2012					0	2012	0	2012	0	2012	100	2012
UNSD_089	Lebanon	LBN	UMC	Beirut	LBN.3.1_1	2	1	863,695on GIS boarderline plausible increase, given the 2012 to 2020 jump, looks to be the correct location	FALSE	3.03503	2012	100	2012					6	2012	0	2012	0	2012	100	2012
UNSD_090	Lesotho	LSO	LMC	Maseru	LSO.5_1	1	2	452k increase seems very large is a 14 year jump so would expect this to be higher, also the boundry covers a much wider area than Maseru.	FALSE			30	2012
UNSD_091	Liechtenstein	LIE	HIC	Schaan	LIE.7_1	1	1	6000 pop 2020 GIS, plausible	FALSE	1.1962	2019	100	2019					33.8406	2019	19.0307	2019	47.1287	2019
UNSD_092	Madagascar	MDG	LIC	Antananarivo	MDG.1.1.7_1	3	1	1mill pop on GIS seems plausible	FALSE	0.578004	2007	88.4981	2009					8.27702	2007	0	2009	0	2007	0	2009
UNSD_093	Malaysia	MYS	UMC	Kuala Lumpur	MYS.4.1_1	2	3	No pop to check but appears to be same area	FALSE									0	2019	0	2019	0	2019	0	2019
UNSD_094	Malaysia	MYS	UMC	Johore Bharu	MYS.1.2_1	2	3	No pop to check but appears to be same area	FALSE									0	2019	0	2019	0	2019	0	2019
UNSD_095	Mauritius	MUS	UMC	Port Louis	MUS.8_1	1	2	pop 109k on GIS slightly large change but likely due to the extended time gap (2012-2020) also GIS area neglects small suburbs on outskirts	FALSE									0	2012	0	2012	0	2012	0	2012
UNSD_096	Monaco	MCO	HIC	Monaco	MCO	0	2	26k pop in 2020 on GIS is a little bit low but seems the GIS is in the right place. Some very densly populated areas around the edge of the country boundry	FALSE	2.21632	2017	100	2017					0	2017	10.1152	2017	89.9	2017
UNSD_097	Montenegro	MNE	UMC	Cetinje	MNE.6_1	1	1	15k pop in 2020 on GIS seems plausible	FALSE	2.23095	2012	89	2012
UNSD_098	Montenegro	MNE	UMC	Podgorica	MNE.16_1	1	1	206k pop in 2020 on GIS seems plausible	FALSE	1.50933	2012	80	2012					0	2009	0	2009	0	2009	100	2009
UNSD_099	Morocco	MAR	LMC	Marrakech	MAR.8.5_1	2	2	GIS is 1.5 mill pop. This is a bit high but there is a slightly higher time gap than other instances. Boundry spreads quite far north of marrakesh city	FALSE	0.878382	2014	93	2014					0	2014	0	2014	0	2014	0	2014
UNSD_100	Morocco	MAR	LMC	Casablanca (Dar-El-Beida)	MAR.5.1_1	2	1	GIS says 4.28mill pop in 2020 this is a plausible increase for the time frame	FALSE	1.16658	2014	100	2015							0	2015
UNSD_101	Morocco	MAR	LMC	Rabat	MAR.11.2_1	2	1	814k on GIS in 2020 seems a plausible increase	FALSE			100	2014
UNSD_102	Myanmar	MMR	LMC	Yangon	MMR.15.4_1	2	2	GIS population lower than data but good match with city boundaries	FALSE													1.87135	2017
UNSD_103	Myanmar	MMR	LIC	Mandalay	MMR.8.2.2_1	3	1		FALSE			80	2007
UNSD_104	Nepal	NPL	LIC	Lalitpur	NPL.1.1.5.27 1	4	1	this pop looks 1000 times too big. Assuming this GIS pop is 296k and therefore a reasonable increase.	FALSE			81.4772	2012					0	2012	0	2012	0	2012	100	2012
UNSD_105	Nepal	NPL	LIC	Kathmandu	NPL.1.1.3.31 1	4	2	1000 times too big again ?? GIS says 3.7mill in 2020 bit big, other data says 1 mill. GIS is in the right place	FALSE			92.592	2012					0	2012	0	2012	0	2012	100	2012
UNSD_106	Nepal	NPL	LIC	Biratnagar	NPL.2.1.3.13 1	4	1	1000 times too big again ?? GIS is 226k which is plausible, location correct.	FALSE			91.8265	2012					0	2012	0	2012	0	2012	0	2012
UNSD_107	Niger	NER	LIC	Zinder	NER.8.4.18_1	3	2	401k on GIS, seems a bit large, could be due to the large time gap, looks as though in the correct location	FALSE	0.296591	2006	76.6	2007					0.0206058	2006	0	2006	0	2006	100	2006
UNSD_108	Niger	NER	LIC	Niamey	NER.5.1.1_1	3	1	1.2mill 2020 pop seems plausible	FALSE			60	2019					0.0206058	2006	0	2019	0	2019	100	2006
UNSD_109	Panama	PAN	HIC	Panama (Distrito capital)	PAN.12_1	1	1	GIS says 1.5mill which is a plausible change, seems to be in the correct place	FALSE	0.952186	2015	91.1	2015					0	2019	0	2019	0	2019	100	2019
UNSD_110	Panama	PAN	UMC	San Miguelito	PAN.12.7_1	2	1	385k on GIS 2020 seems plausible increase	FALSE	0.891676	2010	98	2010					0	2015	0	2015	0	2015	100	2015
UNSD_111	Paraguay	PRY	LMC	Luque	PRY.9.10_1	2	1	301k pop 2020 on GIS seems a plausible increase	FALSE			59.1911	2012
UNSD_112	Paraguay	PRY	LMC	San Lorenzo	PRY.9.15_1	2	1	279k pop 2020 on GIS seems plausible increase	FALSE			73.2393	2012
UNSD_113	Paraguay	PRY	LMC	Capiatá	PRY.9.2_1	2	1	259k pop 2020 on GIS seems plausible increase	FALSE			40.6622	2012
UNSD_114	Paraguay	PRY	LMC	Ciudad del Este	PRY.2.1_1	2	1	3.15k pop 2020 on GIS seems plausible increase	FALSE			64.3624	2012
UNSD_115	Paraguay	PRY	UMC	Asunción	PRY.4.1_1	2	1	543k pop 2020 on GIS seems plausible increase	FALSE			82.3	2017
UNSD_116	Peru	PER	UMC	Callao	PER.7.1_1	2	2	1.3mill pop 2020 seems slightly large increase very dense population around the boundry so the boundry could be slightly different. Level 1 and level 2 are the same- level 2 is default	FALSE	0.814221	2019	99.6415	2019					0.129078	2019
UNSD_117	Peru	PER	UMC	Arequipa	PER.4.1_1	2	2	Covers the entire city whereas Lv3 breaks it down into regions	FALSE			88.1163	2019					14.8895	2019
UNSD_118	Peru	PER	UMC	Lima	PER.15.1_1	2	1	10.5mill pop 2020 GIS seems plausible increase	FALSE	0.911409	2019	89.7207	2019					0.0913141	2019	0.643182	2019	0	2019	100	2019
UNSD_119	Philippines	PHL	LMC	Manila	PHL.47.6_1	2	1	1.5mill pop 2020 GIS is within 25% reduction, bit odd to go down this much but could be due to the very small boundry of manila city	FALSE	2.99556	2007	95	2007							0	2007
UNSD_120	Qatar	QAT	HIC	Al-Rayyan	QAT.5_1	1	3	No pop to check but appears to be same area	FALSE			100	2019
UNSD_121	Moldova	MDA	LMC	Beltsy	MDA.2_1	1	2	called Balti also. Pop 96k little bit lower than would be expected, boundry looks to be right though	FALSE	7.1138	2014	100	2015					0	2019	0	2019	0	2019	100	2019
UNSD_122	Samoa	WSM	LMC	Apia	WSM.9_1	1	2	Level 1 covers entirety of city but is much larger than city boundary also. Believed to be a better macth than Lv2 and more likely the level at which waste is managed	FALSE			97.8	2015
UNSD_123	Senegal	SEN	LIC	Dakar	SEN.1_1	1	1	Population best matches with level 1	FALSE									0	2015	0	2015	0	2015	0	2015
UNSD_124	Serbia	SRB	UMC	Nis	SRB.10.5_1	2	1	270k pop GIS 2020 seems plausible increase	FALSE									0	2012	0	2012	0	2012	0	2012
UNSD_125	Serbia	SRB	UMC	Novi Sad	SRB.5.6_1	2	1	392K POP 2020 seems ok	FALSE									0	2012	0	2012	0	2012	0	2012
UNSD_126	Serbia	SRB	UMC	Belgrade	SRB.3_1	1	1	1.7mil on GIS seems ok	FALSE									0	2012	0	2012	0	2012	0	2012
UNSD_127	South Africa	ZAF	UMC	Soweto	ZAF.3.1_1	2 or 3	2	out by factor of 1000?? seems to come under the city of johannesburg boundry (pop 5.8mill GIS). This covers a bit extra than just soweto so is probably the reason for the increase.	FALSE	1.18065	2017	100	2017					2.58469	2017	7.4818	2017	0	2017
UNSD_128	South Africa	ZAF	UMC	Port Elizabeth	ZAF.1.7_1	2 or 3	3	seems to be no specific ares is likely a sum of numbered level 4s but pop of this area is 1.3mill which is a lot higher than this area so is not the best match.	FALSE	2.64965	2017	70	2017					0	2017	0	2017	0	2017
UNSD_129	South Africa	ZAF	UMC	Cape Town	ZAF.9.3_1	2 or 3	1	4.7mill GIS seems plausible	FALSE	0.851324	2017	100	2017					0.616808	2017	8.57764	2017	0	2017	100	2017
UNSD_130	Sri Lanka	LKA	UMC	Moratuwa	LKA.5.9_1	2	1	140k pop GIS reasonable change	FALSE	0.67366	2007	90	2007					0	2017	0	2017	0	2017	100	2017
UNSD_131	Sri Lanka	LKA	LMC	Dehiwala-Mount Lavinia	LKA.5.2_1	2	1	168k pop Gis reasonable change	FALSE	3.50278	2016	96	2007					6.23302	2016	0	2016	0	2016	100	2016
UNSD_132	Sri Lanka	LKA	LMC	Colombo	KLKA.5.1_1	2	2	336K Pop GIS quite a lot different seems that the city extends beyond this boundry so could contain parts of other areas	FALSE	1.29701	2017	83.5443	2016					0	2016	0	2016	0	2016	0	2016
UNSD_136	Suriname	SUR	UMC	Paramaribo	SUR.7_1	1	2	230k pop GIS . Slightly lower than wanted but likely due to densly populated areas surrounding the boundry	FALSE			44.48	2012
UNSD_137	Togo	TGO	LIC	Lomé	TGO.3.1_1	2	3	No pop to check but appears to be same area	FALSE			70	2012
UNSD_138	Uganda	UGA	LIC	Kampala	UGA.16.1_1	2	1	1.7MILL GIS reasonable difference.	FALSE	0.9	2017	92.0995	2017
UNSD_139	Ukraine	UKR	LMC	Kiev	UKR.11_1	1	1	I think this is kiev city 2.9mill pop so similar	FALSE	1.3269	2019	100	2019							0	2019	13.8441	2019
UNSD_140	United Arab Emirates	ARE	HIC	Dubai	ARE.3_1	1	2	no pop but boundry covers the area well but also includes the greater dubhi area and no level two covering the entire city	FALSE			100	2015					0	2017	24.5806	2017	0	2017	0	2017
UNSD_141	United Arab Emirates	ARE	HIC	Al-Sharjah	ARE.6_1	1	2	no pop but this is the boundry covering the main city	FALSE									1.99958	2017	61.0225	2017	0	2017	0	2017
UNSD_142	United Arab Emirates	ARE	HIC	Abu Dhabi	ARE.1.1_1	2	1	no pop but this is the boundry covering the main city	FALSE			100	2015					10.8492	2017	19.3937	2017	0	2017	0	2017
UNSD_143	Tanzania	TZA	LIC	Songea	TZA.22.5_1	2	2	289k pop GIS bit big of a pop difference but seems to be the correct location and boundry covwers a large area around the city.	FALSE	1.75101	2014	46.94	2015					14.276	2015	0	2015	0	2015	1.08418	2015
UNSD_144	Tanzania	TZA	LIC	Rukwa	TZA.21.6_1	2	3	Rukwa is the name of the region ( pop 1.3mill GIS). The capital of Rukwa is Sumbawanga (pop 279k on GIS), more likely ??	FALSE	1.64479	2014	59.2	2015
UNSD_145	Tanzania	TZA	LIC	Moshi	TZA.9.3_1	2	1	227k on GIS seems reasonable	FALSE	0.709298	2014	85	2015					0	2015	0	2015	0	2015	0	2015
UNSD_146	Tanzania	TZA	LIC	Dodoma	TZA.3.4_1	2	3	No pop to check but appears to be same area	FALSE									0	2011	0	2011	0	2011	0	2011
UNSD_150	Yemen	YEM	LMC	Ta'izz	YEM.21_1	1	2	Think this is a case of the level 1s being too big and level 2s too small. Will use the level; 1 area as would be hared to choose a level 2 area. Pop much bigger of this area at 3.7mill on GIS	FALSE	0.833261	2012	91	2013					0	2013	0	2013	0	2013	100	2013
UNSD_151	Yemen	YEM	LMC	Aden	YEM.1_1	1	1	911k pop GIS so probably plausible	FALSE	0.652632	2013	96	2013					0	2013	0	2013	0	2013	100	2013
UNSD_152	Yemen	YEM	LMC	Sana'a	YEM.19_1	1	2	1.5mill pop GIS 2020. seems a bit big but given the larger date gap and the map looking okay is likely the right place	FALSE	0.641293	2013	95	2013					0	2013	0	2013	0	2013	100	2013
UNSD_153	Zimbabwe	ZWE	LIC	Rusape	ZWE.3.4_1	2	2	no boundry with this name looks to be in Makoni, 330k pop. Area seems much bigger	FALSE			97	2015					0	2015	0	2015	0	2015	0	2015
UNSD_154	Zimbabwe	ZWE	LIC	Gwanda	ZWE.9.3_1	2	2	141pop covers much larger area than just gwanda but seems to be the right place	FALSE	0.26006	2014	100	2015					0	2015	0	2015	0	2015	0	2015
UNSD_155	Zimbabwe	ZWE	LIC	Gokwe	ZWE.10.3_1	2	2	in gokwe south but again very large area 357k pop on GIS same issue as above	FALSE									0	2015	0	2015	0	2015	0	2015
UNSD_156	Zimbabwe	ZWE	LIC	Chinhoyi	ZWE.6.5_1	2	2	this is in Makonde pop 273k no smaller level to be more precse	FALSE	0.034115	2014	67.5	2015					0	2015	0	2015	0	2015	0	2015
UNSD_157	Zimbabwe	ZWE	LIC	Bulawayo	ZWE.1.1_1	2	1	630k pop 2020 GIS seems reasonable	FALSE	0.246149	2014	97.3	2015					0	2015	0	2015	0	2015	0	2015
UNSD_158	Zimbabwe	ZWE	LIC	Bindura	ZWE.4.1_1	2	2	190k pop 2020 GIS, very big jump but quite large area surrounding the town. 2012 census has pop as 46k but boundry a lot smaller	FALSE	0.275057	2014	87	2015					0	2015	0	2015	0	2015	0	2015
UNSD_159	Zimbabwe	ZWE	LIC	Victoria Falls	ZWE.8.3_1	2	2	found in the hwange district 159k pop 2020 GIS much larger area	FALSE									0	2015	0	2015	0	2015	0	2015
UNSD_160	Zimbabwe	ZWE	LIC	Norton	ZWE.6.1_1	2	2	Chegutu, 320k pop much larger than Norton, same issue as other ZWE, other sources has pop as 58k	FALSE	0.265426	2014	95	2015					0	2015	0	2015	0	2015	0	2015
UNSD_161	Zimbabwe	ZWE	LIC	Mutare	ZWE.3.5_1	2	2	491k pop on GIS, very large area covering way more than just the town.	FALSE									0	2015	0	2015	0	2015	0	2015
UNSD_162	Zimbabwe	ZWE	LIC	Masvingo	ZWE.7.5_1	2	2	329k pop GIS, very large area covering way more than just the town	FALSE			95	2015					0	2015	0	2015	0	2015	0	2015
UNSD_163	Zimbabwe	ZWE	LIC	Kwekwe	ZWE.10.5_1	2	2	337k pop GIS, very large area covering way more than just the town	FALSE	1.00017	2014	91	2015					0	2015	0	2015	0	2015	10.5058	2015
UNSD_164	Zimbabwe	ZWE	LIC	Karima	ZWE.6.4_1	2	3	Thinking this is probably Kariba, similar pop on google and data from other waste sources to suggest. GIS says 80k pop but is a much larger area than just the town.	FALSE	0.0190913	2014	100	2015					0	2015	0	2015	0	2015	0	2015
UNSD_165	Zimbabwe	ZWE	LIC	Kadoma	ZWE.6.3_1	2	2	no pop to compare to but looks to be in the right place but ios a much larger area than the google maps boundry	FALSE			92	2015					7.83626	2015	0	2015	0	2015	0	2015
UNSD_166	Zimbabwe	ZWE	LIC	Harare	ZWE.2.1_1	2	2	2.3mill pop GIS bit over estimate but looks to be in the right place and boundry includes lots of suburb towns	FALSE	0.706703	2014	76	2015					1.76843	2015	0	2015	0	2015	0	2015
UNSD_167	Zimbabwe	ZWE	LIC	Gweru	ZWE.10.4_1	2	2	270k pop GIS 2020, v large area covering more than just the town. Other source 158k pop so seems right	FALSE	0.144969	2014	98	2015					5.76037	2015	0	2015	0	2015	0	2015
SIPSN_01	Indonesia	IDN	LMC	Kota Pasuruan	IDN.11.16_1	2	1		FALSE	0.637425	2020	67.3814	2020					0.0111932	2020	0.419699	2020			100	2020
SIPSN_02	Indonesia	IDN	LMC	Kota Yogyakarta	IDN.33.3_1	2	1		FALSE	0.965747	2020	69.2461	2020					0.356126	2020	0.00312536	2020			0	2020
SIPSN_03	Indonesia	IDN	LMC	Cimahi	IDN.9.8_1	2	1		FALSE	0.480958	2020	84.4337	2020					0.602837	2020	0.23841	2020			0	2020
SIPSN_04	Indonesia	IDN	LMC	Kota Medan	IDN.32.9_1	2	1		FALSE	0.7	2020	50.7615	2020					28.9142	2020	0.0138677	2020			0	2020
SIPSN_05	Indonesia	IDN	LMC	Padang	IDN.30.10_1	2	1		FALSE	0.732212	2020	67.6072	2020					0.222222	2020	0	2020			0	2020
SIPSN_06	Indonesia	IDN	LMC	Palopo	IDN.26.14_1	2	1		FALSE	0.57595	2020	46.9036	2020					1.76388	2020	4.42975	2020			100	2020
SIPSN_07	Indonesia	IDN	LMC	Jambi	IDN.8.3_1	2	1		FALSE	0.70551	2020	74.165	2020					1.53033	2020	0.654197	2020			0	2020
SIPSN_08	Indonesia	IDN	LMC	Banjar Baru	IDN.13.2_1	2	1		FALSE	0.580498	2020	78.5991	2020					2.0665	2020	0.30042	2020			100	2020
SIPSN_09	Indonesia	IDN	LMC	Bitung	IDN.29.1_1	2	1		FALSE	0.7	2020	44.6356	2020					2.87165	2020	0.0609928	2020			100	2020
SIPSN_10	Indonesia	IDN	LMC	Ambon	IDN.19.1_1	2	1		FALSE	0.779059	2020	60.2411	2020					0.641769	2020	0.0742474	2020			100	2020
MOHURD_001	China	CHN	UMC	Shahe	CHN.10.10.14_1	3	1	92% similarity score between GHS and MoHURD populations	FALSE	0.611865	2019
MOHURD_002	China	CHN	UMC	Xincheng	CHN.10.1.19_1	3	2	70% similarity score between GHS and MoHURD populations	FALSE	0.472411	2019
MOHURD_003	China	CHN	UMC	Chengde	CHN.10.3.1_1	3	2	78% similarity score between GHS and MoHURD populations	FALSE	0.695013	2019
MOHURD_004	China	CHN	UMC	Cangzhou	CHN.10.2.2_1	3	1	88% similarity score between GHS and MoHURD populations	FALSE	0.559038	2019
MOHURD_005	China	CHN	UMC	Houma	CHN.25.5.7_1	3	2	60% similarity score between GHS and MoHURD populations	FALSE	0.470696	2019
MOHURD_006	China	CHN	UMC	Genhe	CHN.19.6.6_1	3	2	75% similarity score between GHS and MoHURD populations	FALSE	0.600635	2019
MOHURD_007	China	CHN	UMC	Jining	CHN.19.9.3_1	3	2	74% similarity score between GHS and MoHURD populations	FALSE	0.439849	2019
MOHURD_008	China	CHN	UMC	Jinzhou	CHN.18.4.3_1	3	2	66% similarity score between GHS and MoHURD populations	FALSE	0.376288	2019
MOHURD_009	China	CHN	UMC	Chaoyang	CHN.18.3.2_1	3	1	90% similarity score between GHS and MoHURD populations	FALSE	0.455612	2019
MOHURD_010	China	CHN	UMC	Yanji	CHN.17.9.8_1	3	2	64% similarity score between GHS and MoHURD populations	FALSE	0.403181	2019
MOHURD_011	China	CHN	UMC	Qiqihar	CHN.11.9.9_1	3	2	61% similarity score between GHS and MoHURD populations	FALSE	0.525524	2019
MOHURD_012	China	CHN	UMC	Suifenhe	CHN.11.8.7_1	3	2	71% similarity score between GHS and MoHURD populations	FALSE	0.747885	2019
MOHURD_013	China	CHN	UMC	Yixing	CHN.15.9.5_1	3	2	73% similarity score between GHS and MoHURD populations	FALSE	0.409896	2019
MOHURD_014	China	CHN	UMC	Yuyao	CHN.31.6.7_1	3	2	78% similarity score between GHS and MoHURD populations	FALSE	0.938064	2019
MOHURD_015	China	CHN	UMC	Cixi	CHN.31.6.1_1	3	1	82% similarity score between GHS and MoHURD populations	FALSE	0.54963	2019
MOHURD_016	China	CHN	UMC	Wenzhou	CHN.31.10.7_1	3	2	66% similarity score between GHS and MoHURD populations	FALSE	0.91532	2019
MOHURD_017	China	CHN	UMC	Shengsi	CHN.31.8.4_1	3	2	63% similarity score between GHS and MoHURD populations	FALSE	0.684758	2019
MOHURD_018	China	CHN	UMC	Taizhou	CHN.31.9.1_1	3	2	67% similarity score between GHS and MoHURD populations	FALSE	0.778169	2019
MOHURD_019	China	CHN	UMC	Lishui	CHN.31.5.3_1	3	2	76% similarity score between GHS and MoHURD populations	FALSE	0.514347	2019
MOHURD_020	China	CHN	UMC	Fuqing	CHN.4.1.2_1	3	1	80% similarity score between GHS and MoHURD populations	FALSE	0.563459	2019
MOHURD_021	China	CHN	UMC	Sanming	CHN.4.7.8_1	3	1	94% similarity score between GHS and MoHURD populations	FALSE	0.480908	2019
MOHURD_022	China	CHN	UMC	Jinjiang	CHN.4.6.4_1	3	2	79% similarity score between GHS and MoHURD populations	FALSE	0.812312	2019
MOHURD_023	China	CHN	UMC	Nan'an	CHN.4.6.5_1	3	2	65% similarity score between GHS and MoHURD populations	FALSE	0.642145	2019
MOHURD_024	China	CHN	UMC	Pingxiang	CHN.16.7.2_1	3	1	83% similarity score between GHS and MoHURD populations	FALSE	0.506113	2019
MOHURD_025	China	CHN	UMC	Jiaoxian	CHN.23.10.3_1	3	2	62% similarity score between GHS and MoHURD populations	FALSE	0.548544	2019
MOHURD_026	China	CHN	UMC	Tai an	CHN.23.12.4_1	3	2	62% similarity score between GHS and MoHURD populations	FALSE	0.436247	2019
MOHURD_027	China	CHN	UMC	Xinwen	CHN.23.12.5_1	3	2	71% similarity score between GHS and MoHURD populations	FALSE	0.403158	2019
MOHURD_028	China	CHN	UMC	Feicheng	CHN.23.12.2_1	3	2	75% similarity score between GHS and MoHURD populations	FALSE	0.390741	2019
MOHURD_029	China	CHN	UMC	Gaoqing	CHN.23.17.1_1	3	2	68% similarity score between GHS and MoHURD populations	FALSE	0.606076	2019
MOHURD_030	China	CHN	UMC	Xingyang	CHN.12.16.4_1	3	1	86% similarity score between GHS and MoHURD populations	FALSE	0.475939	2019
MOHURD_031	China	CHN	UMC	Dengfeng	CHN.12.16.1_1	3	2	77% similarity score between GHS and MoHURD populations	FALSE	0.501355	2019
MOHURD_032	China	CHN	UMC	Huixian	CHN.12.13.4_1	3	2	65% similarity score between GHS and MoHURD populations	FALSE	0.629924	2019
MOHURD_033	China	CHN	UMC	Puyang	CHN.12.10.3_1	3	1	83% similarity score between GHS and MoHURD populations	FALSE	0.65517	2019
MOHURD_034	China	CHN	UMC	Jiyuan	CHN.12.4.1_1	3	2	67% similarity score between GHS and MoHURD populations	FALSE	0.514029	2019
MOHURD_035	China	CHN	UMC	Kaiping	CHN.6.7.4_1	3	2	68% similarity score between GHS and MoHURD populations	FALSE	0.407701	2019
MOHURD_036	China	CHN	UMC	Heshan	CHN.6.7.2_1	3	1	84% similarity score between GHS and MoHURD populations	FALSE	0.432409	2019
MOHURD_037	China	CHN	UMC	Sihui	CHN.6.19.6_1	3	2	68% similarity score between GHS and MoHURD populations	FALSE	0.46948	2019
MOHURD_038	China	CHN	UMC	Shanwei	CHN.6.13.4_1	3	2	61% similarity score between GHS and MoHURD populations	FALSE	0.496026	2019
MOHURD_039	China	CHN	UMC	Qingyuan	CHN.6.11.5_1	3	2	72% similarity score between GHS and MoHURD populations	FALSE	0.59196	2019
MOHURD_040	China	CHN	UMC	Guan	CHN.26.16.3_1	3	1	83% similarity score between GHS and MoHURD populations	FALSE	0.380888	2019
MOHURD_041	China	CHN	UMC	Guanghan	CHN.26.4.2_1	3	2	65% similarity score between GHS and MoHURD populations	FALSE	0.545552	2019
MOHURD_042	China	CHN	UMC	Shifang	CHN.26.4.4_1	3	2	69% similarity score between GHS and MoHURD populations	FALSE	0.502483	2019
MOHURD_043	China	CHN	UMC	Zhongshan	CHN.8.4.4_1	3	2	77% similarity score between GHS and MoHURD populations	FALSE	0.460366	2019
MOHURD_044	China	CHN	UMC	Huayin	CHN.22.6.8_1	3	2	70% similarity score between GHS and MoHURD populations	FALSE	0.392572	2019
MOHURD_045	China	CHN	UMC	Wuzhong	CHN.20.3.3_1	3	1	85% similarity score between GHS and MoHURD populations	FALSE	0.39236	2019
MOHURD_046	China	CHN	UMC	Kashgar	CHN.28.9.3_1	3	2	76% similarity score between GHS and MoHURD populations	FALSE	0.44406	2019
MOHURD_047	China	CHN	UMC	Shihezi	CHN.28.12.1_1	3	2	72% similarity score between GHS and MoHURD populations	FALSE	0.45192	2019

## Sheet: 04_Age_of_data_removed
								Short_name:	Waste_gen_rate	Waste_gen_rate_yr	Col_cov	Col_cov_yr	Plastic_MSW	Plastic_MSW_yr	Plastic_rigid	Plastic_rigid_yr	Other_recv	Other_Recv_yr	Form_dry_recy	Form_dry_recy_yr	Incin	Incin_yr	Cont_disp	Cont_disp_yr	Cont_fac	Cont_fac_yr
								ID:	tP1pc		tC1		C0		C0a		tC2ii		tC2i		tC2iii		tC3
								Unit:	kg·cap-1·d-1	Year	% MSW generation	Year	% MSW generated	Year	% plastic in MSW	Year	% collected MSW	Year	% collected MSW	Year	% collected MSW	Year	% collected MSW for disposal	Year	% MSW generated	Year
Data_ID	Country	ISO3	Income_level	Municipality	UniqueID for matching admin boundary	GADM level of best match	GADM boundary match score	GADM boundary match notes	Waste generation rate	Waste generation rate year	Collection coverage	Collection coverage year	Plastic in MSW	Plastic in MSW year	Rigid plastic	Rigid Plastic Year	Other recovery	Other recovery year	Formal dry recycling	Formal dry recycling year	Incineration	Incineration year	Controlled disposal	Controlled disposal year	MSW collected and managed in controlled facilities	MSW collected and managed in controlled facilities year
WACT_01	Kenya	KEN	LMC	Nairobi	KEN.30_1	1	1	Population and boundary match well	0.7	2019	65.25	2019	9.6	2019	60.1042	2019					0	2019	0	2019	14.66	2019
WACT_02	Seychelles	SYC	HIC	Victoria	SYC	0	2	Population is for entire Seychelles not just Victoria. Assigned to entire Syechelles as unclear at what level WaCT applied.	2.34	2019	97.77	2019	11.9	2019	45.4622	2019					0	2019	100	2019	97.77	2019
WACT_03	Kenya	KEN	LMC	Kiambu	KEN.13_1	1	2	Population suggests WaCT applied for Kiambu County, therefore level 1 although this poorly matches the city limits.	0.53	2020	51.68	2020	6.77	2020	39.4387	2020					0	2020	0	2020	3	2020
WACT_04	Kenya	KEN	LMC	Mombasa	KEN.28_1	1	1	Population and boundary match well	0.59	2020	56.4	2020	8.47	2020	48.4061	2020					0	2020	0	2020	5.15	2020
WACT_05	Bangladesh	BGD	LMC	Khulna	BGD.4.5.6_1	3	3	Data population much less than GIS population, likely due to Khulna being divided into several parts within GADM. Level 2 has much larger population in GIS than dataset. Assumed data applies to central area of Khulna even though populations differ.	0.6	2021	62.89	2021	4.98	2021	29.7189	2021					0	2021	0	2021	0.26	2021
WACT_06	Cambodia	KHM	LMC	Kep	KHM.10.1_1	2	1	Level 2 (province) believed to be best match even though data population is less than GIS.	1.2	2021	58.15	2021	18.9	2021	48.2011	2021					0	2021	0	2021	0.05	2021
WACT_07	Cambodia	KHM	LMC	Sihanoukville	KHM.13_1	1	2	Population best matches level 1 although this is a poor match to the city boundaries.	1.75	2021	89.59	2021	22.65	2021	35.894	2021					0	2021	0	2021	0	2021
WACT_08	Democratic Republic of the Congo	COD	LIC	Bukavu	COD.22.2_1	2	1	Dataset population slightly higher than admin boundary but has the best match to the city boundaries.	0.69	2021	7.02	2021	6.37	2021	37.8336	2021					0	2021	0	2021	0.1	2021
WACT_09	Dominican Republic	DOM	UMC	Santo Domingo (East + Boco Chica)	DOM.31.5_1 + DOM.31.1_1	2	2	GIS population is slightly lower than that reported in dataset, likel due to urban agglomerates also being included.	1.04	2021	82.78	2021	12.85	2021	45.8366	2021					0	2021	6.66773	2021	5.63	2021
WACT_10	Ethiopia	ETH	LIC	Addis Ababa	ETH.1_1	1 or 2	2	Population in dataset slightly higher than GIS but GADM boundary clearly matches that of the city.	0.44	2021	98.19	2021	8.19	2021	49.2063	2021					20.7983	2021	0	2021	23.14	2021
WACT_11	Ethiopia	ETH	LIC	Bahir Dar	ETH.3.3_1	2 or 3	2	Both level 2 and 3 are same. The population matches well but the GADM boundary covers only part of the city boundaries	0.56	2021	85.53	2021	11.69	2021	55.6031	2021					0	2021	0	2021	0.37	2021
WACT_12	India	IND	LMC	Mangalore	IND.16.12.3_1	3	2	GIS population is higher than dataset as GADM boundary covers a larger area than the city boundary, but level 3 is the most granular and provides best fit.	0.67	2021	89.83	2021	9.24	2021	26.9481	2021					0	2021	0	2021	12.87	2021
WACT_14	Nigeria	NGA	LMC	Lagos	NGA.25_1	1	2	Dataset population is less than GIS population. Lv 1 GADM boundary extends along the coast outside city limits based on Google Maps. Level 2 is a worse fit as breaks city down into several districts.	0.79	2021	47.98	2021	31.83	2021	32.6422	2021					0	2021	0	2021	7.82	2021
WACT_15	Pakistan	PAK	LMC	Karachi	PAK.8.2_1	2	2	Population of dataset is higher than GIS population, but reasonably close and seems to be the best level of match	0.49	2021	81.17	2021	13.08	2021	22.7064	2021					0	2021	0	2021	0.06	2021
WACT_16	Tanzania	TZA	LMC	Dar es Salaan	TZA.2_1	1	1	Populaiton matches well. GADM boundary slightly larger than city	0.84	2021	35.61	2021	4.71	2021	57.5372	2021					0	2021	0	2021	0.97	2021
WACT_17	Tunisia	TUN	LMC	Sousse	TUN.20_1	1	3	No single boundary matches well as city is divided into several GADM polygons. Likely a combination of several of these, Level 1 probably best match	1.18	2021	90.2	2021	15.28	2021	49.8691	2021					0	2021	100	2021	90.2	2021
WACT_18	Zimbabwe	ZWE	LMC	Harare	ZWE.2.1_1	1 or 2	2	GIS population larger than dataset populaiton but GADM boundary matches city limits well. Both level 1 and 2 are the same for Harare.	0.56	2021	25.39	2021	15.11	2021	48.3786	2021					0	2021	0	2021	1.77	2021
WACT_19	Malaysia	MYS	UMC	Seremban	MYS.7.6_1	2	1	Population matches well as do adminsitrative boudnaries	0.88	2021	96.25	2021	15.83	2021	42.1352	2021					0	2021	100	2021	96.25	2021
WACT_20	Thailand	THA	UMC	Chonburi	THA.12_1	1	2	Level 1 best matches population, but GADM boundary also encompasses other cities (e.g. Pattaya City)	1.23	2021	98.18	2021	15.07	2021	49.3696	2021					0	2021	22.7854	2021	36.98	2021
WACT_21	Vietnam	VNM	LMC	Tam Ky	VNM.47.15_1	2	1	Good match to population and city limits	0.92	2021	93.86	2021	20.51	2021	45.2462	2021					0	2021	0	2021	0	2021
WACT_22	Vietnam	VNM	LMC	Hoi-An	VNM.47.6_1	2	1	Good match to population and city limits	0.64	2021	99.23	2021	16.75	2021	31.3433	2021					0	2021	100	2021	97.64	2021
WACT_23	Vietnam	VNM	LMC	Anonymous	VNM.54.2_1	2	2	Dataset population slightly higher but GADM boundary matches city limits well.	0.83	2021	97.33	2021	13.67	2021	41.4777	2021					0	2021	100	2021	76.56	2021
WACT_24	Indonesia	IDN	LMC	Anonymous	IDN.9.10_1	2	2	Dataset population less than GIS but GADM boundary matches city limits well.	0.48	2021	94.37	2021	17.72	2021	27.5395	2021					0	2021	0	2021	2.49	2021
WACT_25	Indonesia	IDN	LMC	Anonymous	IDN.9.16_1	2	1	Population and boundary match well	0.51	2021	88.04	2021	19.14	2021	31.7137	2021					0	2021	0	2021	0.82	2021
WACT_26	Ghana	GHA	LMC	Cape Coast	GHA.3.8_1	2	1	Good match to population and city limits	0.73	2021	62.59	2021	20.26	2021	20.3356	2021					0	2021	0	2021	0	2021
WACT_27	Egypt	EGY	LMC	Alexandria	EGY.6_1	1	2	Dataset population slightly more than GIS but is for more recent year (2022 vs 2020) so could have increased a bit.	0.93	2022	83.76	2022	15.98	2022	27.1589	2022					0	2022	100	2022	80.8	2022
WACT_28	Egypt	EGY	LMC	Anonymous	EGY.1_1	1	1	Population matches well. Applies to a governate (provincial) region	0.7	2022	59.93	2022	10.96	2022	36.3139	2022					0	2022	55.7325	2022	48.07	2022
WACT_29	India	IND	LMC	Thiruvananthapuram	IND.17.12.4_1	3	1	Population matches well as do city boudnaries	0.44	2021	68.02	2021	10.73	2021	54.4268	2021					0	2021	0	2021	49.47	2021
WACT_30	Kenya	KEN	LMC	Taita Taveta	KEN.39_1	1	1	Population matches well as do adminsitrative boudnaries	0.54	2022	30.06	2022	4.77	2022	61.6352	2022					0	2022	0	2022	1.32	2022
WACT_31	Philippines	PHL	LMC	Cagayan de Oro	PHL.49.5_1	2	1	Population matches well as do city boudnaries	0.38	2021	92.3	2021	15.52	2021	34.0851	2021					0	2021	100	2021	91.33	2021
WACT_32	Philippines	PHL	LMC	Legazpi	PHL.5.7_1	2	1	Population matches well, admin boundaries include more rural areas.	0.37	2021	61.7	2021	11.77	2021	49.6177	2021					0	2021	100	2021	56.46	2021
WACT_33	Philippines	PHL	LMC	Ormoc	PHL.43.30_1	2	1	Population matches well, admin boundaries include more rural areas.	0.31	2021	58.36	2021	19.19	2021	63.1579	2021					0	2021	0	2021	12.5	2021
WACT_34	Senegal	SEN	LMC	Dakar	SEN.1.1_1	2	2	GIS population slightly higher. Some uncertainty on how far along the peninsular the city spreads but Level 2 best matches the population so chosen.	0.97	2022	95.22	2022	9.13	2022	39.6495	2022					0	2022	0	2022	1.33	2022
WACT_35	Thailand	THA	UMC	Anonymous	THA.64.3_1	2	3	GIS population much bigger but matches pcity boundaries well	1.05	2021	97.97	2021	17.23	2021	41.0911	2021					93.3844	2021	0	2021	93.04	2021
WACT_36	Thailand	THA	UMC	Anonymous	THA.67.12_1	2	2	GIS Population less than dataset.. Unlikely to be level 1 as extends to mainland. Instead taken as level 2 to represent entire island of Koh Samui.	1.41	2021	94.46	2021	17.43	2021	44.9225	2021					0	2021	0	2021	25.84	2021
WACT_37	Thailand	THA	UMC	Anonymous	THA.64.7_1	2	3	GIS population much bigger but matches city boundaries well. Level 2 better match than level 3 for population	1.28	2021	95.24	2021	16.51	2021	38.0981	2021					0	2021	0	2021	10.6	2021
WACT_38	Thailand	THA	UMC	Anonymous	THA.67.13_1	2	1	Population matches well as do city boudnaries	1.22	2021	97.82	2021	24.5	2021	49.3469	2021					0	2021	0	2021	12.29	2021
WACT_39	Uganda	UGA	LIC	Anonymous	UGA.16.1_1 + UGA.57.3_1 + UGA.44.3_1 + UGA.57.1_1 + UGA.57.2_1	2	2	This is believed to be represented by five level 2 GADM boundaries. The population via GIS is slightly higher than that recorded in the dataset.	0.97	2021	34.82	2021	8.07	2021	31.1029	2021					0	2021	0	2021	1.96	2021
WABI_001	Australia	AUS	HIC	Adelaide	AUS.8.1_1+AUS.8.67_1+AUS.8.62_1+AUS.8.8_1+AUS.8.41_1+AUS.8.65_1+AUS.8.50_1+AUS.8.11_1+AUS.8.9_1+AUS.8.58_1+AUS.8.54_1+AUS.8.46_1+AUS.8.22_1+AUS.34_1+AUS.8.32_1+AUS.8.45_1	2	2	GIS population smaller than data. This is because the data is believed to represent the wider metropolitan area of Adelaide so joined several polygons	1.144	2007	100	2007	5	2007			12.15	2007	41.85	2007	0	2007	100	2007
WABI_002	Greece	GRC	HIC	Athens (GAA)	GRC.3.1_1	1 or 2	1	Added to level 2 as seems best match for population. Level 1 also the same.	1.6	2008	100	2008	13	2008			0.04	2008	9.96	2008	0	2008	100	2008
WABI_003	Bahrain	BHR	HIC	Bahrain	BHR	0	1	Good match with 2010 population	1.1	2009	100	2009	13.4	2009			0	2009	5	2009	0	2009	100	2009
WABI_004	Mali	MLI	LIC	Bamako	MLI.1.1.1_1	1 or 2 or 3	1	Good match with 2010 population	0.700001	2007	57	2007	2	2007			0	2007	0	2007	0	2007	0	2007
WABI_005	India	IND	LMC	Bangalore	IND.16.3.2_1	3	1	Added to Bangalore North LV3 as covers the majority of the city.	0.547945	2007	75	2007	11	2007			14	2007	0	2007	0	2007	73	2007
WABI_006	United Kingdom	GBR	HIC	Belfast	GBR.2.3.1_1	2 or 3	1	Reasonable match on population and matches boudnaries well	1.87088	2013	100	2013	6	2013			14.315	2013	20.685	2013	0	2013	98	2013
WABI_007	Brazil	BRA	UMC	Belo Horizonte	BRA.13.65_1	2	1	2.5mill pop on GIS seems plausible	1.08775	2007	82	2007	11	2007			0	2007	0.609756	2007	0	2007	100	2007
WABI_008	Kyrgyzstan	KGZ	LIC	Bishkek	KGZ.2.1_1	1 or 2	2	Population slightly higher than GIS population	0.542073	2010	83	2010	8	2010			0.1875	2010	3.38855	2010	0	2010	0	2010
WABI_009	Peru	PER	UMC	Canete	PER.16.3.14_1	3	1	Reasonable match on population	0.663024	2007	78	2007	9	2007			0	2007	1.28205	2007	0	2007	0	2007
WABI_010	Saint Lucia	LCA	UMC	Castries	LCA.3_1	1	1	Good match with 2010 population	0.596553	2007	100	2007	26	2007			0	2007	2.5	2007	0	2007	100	2007
WABI_011	Mauritius	MUS	UMC	Curepipe	MUS.7_1	1	3	360k pop bigger due to level 1 being the smallest level but does contain the area	0.777264	2009	100	2009	16	2009			0	2009	0	2009	0	2009	100	2009
WABI_012	Tanzania	TZA	LIC	Dar-es-Salaam	TZA.2_1	1	1	5.6mil pop in 2015 seems plausible	0.951406	2013	40	2013	16	2013			0	2013	0	2013	0	2013	0	2013
WABI_013	India	IND	LMC	Delhi	IND.25.1.1_1	1 or 2 or 3	1	16mil 2010 pop seems plausible	0.500072	2007	75	2007	1	2007			6	2007	0	2007	0	2007	10	2007
WABI_014	Bangladesh	BGD	LIC	Dhaka	BGD.3.1_1	2	2	Waste management is split differently for urban and rural areas. The GIS layer does not account for this difference. A regional level is chosen to represent Dhaka (level 2) even though this is bigger than Dhaka it is deemed the best fit.	0.543282	2007	55	2007	4	2007			1	2007	0	2007	0	2007	55	2007
WABI_015	Nepal	NPL	LIC	Ghorahi	NPL.4.3.1.39_1	4	2	Admin Boundary actually called TribhuwanNagarN.P. This data has higher population than in GIS measurement but believed to be same place.Wikipedia says Ghorahi has won award for cleanest landfill.	0.32491	2007	83	2007	5	2007			0	2007	2.40964	2007	0	2007	88	2007
WABI_016	Mexico	MEX	UMC	Guadalajara	MEX.14.43_1	2	2	GIS has double the population of this, but boundary matches well	1.17461	2010	95	2010	10	2010			0	2010	0	2010	0	2010	100	2010
WABI_017	Indonesia	IDN	LMC	Jakarta	IDN.7_1	1	1	Reasonable match on population in 2010	0.691981	2010	95	2010	14.27	2010			5	2010	0	2010	0	2010	84	2010
WABI_018	Uganda	UGA	LIC	Kampala	UGA.16.1_1+UGA.57.3_1+UGA.57.1_1+UGA.44.3_1	2	2	Data for Greater Kampala. Has bigger population than GIS suggest but boundary matches well	0.5	2010	50	2010	7.8	2010			0	2010	0	2010	0	2010	55	2010
WABI_019	China	CHN	LMC	Kunming	CHN.30.7.6_1	3	1	4mill pop in 2010 on GIS reasonable change	0.73392	2007	100	2007	7	2007			0	2007	0	2007	0	2007	100	2007
WABI_020	Pakistan	PAK	LMC	Lahore	PAK.7.5.2_1	3	1	Population matches well as does boundary	0.649752	2011	77	2011	12.25	2011			8	2011	0	2011	0	2011	18	2011
WABI_021	Zambia	ZMB	LIC	Lusaka	ZMB.5.4_1	2	2	1.1m Pop in 2010 so data pop is higher. Good match with boundary	0.376062	2007	63	2007	7	2007			0	2007	6.34921	2007	0	2007	45	2007
WABI_022	Nicaragua	NIC	LMC	Managua	NIC.13.2_1	2	1	Populaiton matches well	1.32632	2007	68	2007	8	2007			0	2007	0.735294	2007	0	2007	100	2007
WABI_023	Mozambique	MOZ	LIC	Maputo	MOZ.5.2_1	2	2	GIS has slightly higher population than referenced here. Could be Level 3 instead which has a lower population than reported here. Think Level 2 is best match as described as "District" level and GIS layer covers most of city	0.866133	2009	82	2009	8	2009			0	2009	0	2009	0	2009	0	2009
WABI_024	Liberia	LBR	LIC	Monrovia	LBR.11.2.1_1	2 or 3	1	Both level 2 and 3 have same GIS data but think based on oher cities, Level 3 is the best match.	0.617055	2013	37	2013	13	2013			0	2013	0	2013	0	2013	70	2013
WABI_025	Tanzania	TZA	LIC	Moshi	TZA.9.3_1	2	1	Good match on population and boundary	0.779477	2007	60	2007	9	2007			0	2007	0	2007	0	2007	87	2007
WABI_026	Kenya	KEN	LIC	Nairobi	KEN.30_1	1	1	Good match on population and boundary	0.958904	2007	52	2007	16.1	2007			0	2007	0	2007	0	2007	0	2007
WABI_027	Egypt	EGY	LMC	Qena	EGY.25.10_1	2	2	Better match with Level 2 and looking at GIS layer for comparison confirms but population reported here is lower than GIS. There is also a Qena city but that has a GIS population of zero so perhaps why. Added to Qena on LV2 instead.	0.49576	2009	100	2009	12.5	2009			0	2009	0	2009	0	2009	0	2009
WABI_028	Philippines	PHL	LMC	Quezon City	PHL.47.14_1	2	1	Good match on population and boundary	0.704859	2007	99	2007	16	2007			8	2007	0	2007	0	2007	98	2007
WABI_029	Netherlands	NLD	HIC	Rotterdam	NLD.14.67_1	2	1	600k pop seems plausible	1.50971	2007	100	2007	6.8	2007			9.729	2007	13.271	2007	76.23	2007	100	2007
WABI_030	United States	USA	HIC	San Francisco	USA.5.38_1	2	1	804k pop on GIS seems reasonable	1.66714	2007	100	2007	11	2007			13.344	2007	34.656	2007	0	2007	100	2007
WABI_031	Singapore	SGP	HIC	Singapore	SGP	0	1	Good match on population and boundary	1.32132	2013	100	2013	11	2013			0.93	2013	4.07	2013	38	2013	100	2013
WABI_032	Bulgaria	BGR	UMC	Sofia	BGR.5.1_1	1 or 2	1	Good match on population and boundary	1.01159	2011	100	2011	15.6	2011			0	2011	0	2011	0	2011	100	2011
WABI_033	Tunisia	TUN	LMC	Sousse	TUN.20.15_1+TUN.20.4_1+TUN.20.17_1+TUN.20.14_1+TUN.20.16_1	2	2	Several level 2 polygons represented this data point best	0.622539	2007	100	2007	9	2007			0	2007	0	2007	0	2007	100	2007
WABI_034	India	IND	LMC	Surat	IND.11.28.2_1	3	2	Added to level 3 (Chorasi). Although this has a much lower GIS popualtion than that shown in the data here, this is believed to be due to an error in where the GIS popualtion is allcoated spatially. Chorosi in fact better matches city boundaries.	0.330554	2010	93	2010	10	2010			16	2010	0	2010	0	2010	75	2010
WABI_035	United States	USA	HIC	Tompkins County	USA.33.56_1	2	1	Good match on population and boundary	2.72632	2007	100	2007	11	2007			0	2007	37	2007	0	2007	100	2007
WABI_036	Bulgaria	BGR	UMC	Varna	BGR.24.11_1	2	1	Good match on population and boundary	1.13947	2007	100	2007	15	2007			0	2007	2	2007	0	2007	99	2007
WABI_037	Spain	ESP	HIC	Vitoria-Gasteiz	ESP.16.1.3.12 1	4	2	Lv3 and 4 both good matches. Decided Lv3 as more likely level at which waste is managed	1.06142	2012	100	2012	0.161	2012			0	2012	38	2012	0	2012	100	2012
WABI_038	India	IND	LMC	Warangal	IND.32.10.1_1	3	1	Added to Hanmakonda (LV3) which represent the Taluka which roughly covers the Greater Warangal Muncipal Corporation.	0.366583	2012	95	2012	12	2012			31	2012	0	2012	0	2012	12	2012
WABI_039	Egypt	EGY	LMC	Abo Badawy Village	EGY.23.4_1	2	3	same issue.. Small village large boundries, also name a bit different, Ezbet Abou Badawi 306k pop	0.567394	2012	100	2012	3	2012			0	2012	0	2012	0	2012	0	2012
WABI_040	Egypt	EGY	LMC	Assiut City	EGY.18.7_1	2	1	GIS population shows reasonable increase woith time	0.248825	2012	100	2012	10.03	2012			0	2012	0	2012	0	2012	0	2012
WABI_041	Ethiopia	ETH	LIC	Aweday City	ETH.8.14.10_1	3	2	in the Haro maya region, GIS pop much bigger, gis boundry is much larger than the town and contains other urban areas. No level 4 to further disaggregate	0.849938	2013	29	2013	3.3	2013			0	2013	0	2013	0	2013	0	2013
WABI_042	Ethiopia	ETH	LIC	Bale Robe	ETH.8.2.17_1	3	2	200k pop same isssue as above, small town big level 3 area covers the correct place	0.331348	2013	30	2013	4	2013			0	2013	0	2013	0	2013	0	2013
WABI_043	Egypt	EGY	LMC	Banha City	EGY.12.5_1	2	2	GIS pop bigger as boudnary covers much more than just the city and no more granular levels. V densly populated even on the outskirts of the city so probably has caused this higher pop	0.671613	2012	100	2012	13.5	2012			0	2012	0	2012	0	2012	0	2012
WABI_044	Egypt	EGY	LMC	Beila City	EGY.23.4_1	2	2	Think this is Biyala, in Kafr el sheikh(L1), is hard to find info on internet but one website says Beila is in Kafr el sh.. and one had the weather for 'bella' in this position. GIS has pop as 306k the area is a lot wider than the town itself	0.796665	2012	100	2012	5	2012			0	2012	0	2012	0	2012	0	2012
WABI_045	China	CHN	UMC	Bengbu	CHN.1.2.1_1	3	2	840k pop on GIS bit low but I think this is due to the boundry being quirte small with densly populated areas lying outside the boundry may explain the increase	0.723986	2018	100	2018	22	2018							73	2018	100	2018
WABI_046	Ethiopia	ETH	LIC	Bishoftu	ETH.8.15.1_1	3	2	in the adas region, small towns surround it in the L3. 339k GIS pop, probably larger due to the boundry size	0.349996	2013	80	2013	7.8	2013			0	2013	0	2013	0	2013	0	2013
WABI_048	Ethiopia	ETH	LIC	Burie	ETH.3.6.2_1	3	2	sometimes called bure or burie-zuria, 186k pop on GIS fairly close given timeframe, also this covers wider area than just the town	0.249066	2013	10	2013	13	2013			0	2013	0	2013	0	2013	0	2013
WABI_049	Ethiopia	ETH	LIC	Dilla	ETH.10.11.2_1	3	3	Not sure how long ago this pop was taken. City s cut in half by 3 boundries, this one covers the most part of the urban area. GIS has pop as 199k	0.25008	2013	30	2013	6	2013			0	2013	0	2013	0	2013	0	2013
WABI_050	Ethiopia	ETH	LIC	Dire Dawa	ETH.5.1.1_1	3	2	424k pop on GIS not sure why it is this much higher as surrounding area has low density pop but might be to do with time of data pop and slightly extendend boundry. Seems to be in the right place ref google	0.5	2013	60	2013	9	2013			0	2013	0	2013	0	2013	65	2013
WABI_051	Egypt	EGY	LMC	El Fateh City	EGY.18.4_1	2	3	Again I think this is on a smaller level than GIS has. Think this is the right place but is hard to be sure because of different spellings on maps and on google and in data. Pop also v different (327k pop) but this is likely due to the larger area level	0.83599	2012	100	2012	10.03	2012			0	2012	0	2012	0	2012	0	2012
WABI_052	Egypt	EGY	LMC	El Zarabi Village	EGY.18.2_1	2	2	found in the Abu Tij region, AZ zarabi on map. 349k pop on GIS this village is veery small in comparison to the region but no smaller levels exist.	0.434042	2012	100	2012	10.03	2012			0	2012	0	2012	0	2012	40	2012
WABI_053	Egypt	EGY	LMC	Fayoum City	EGY.4.1_1	2	3	960k pop on GIS al Fayyum is the placethat comes up in google but there are multiple spellings so tricky to say for sure3	0.686103	2012	100	2012	6	2012			0	2012	0	2012	0	2012	0	2012
WABI_054	Ethiopia	ETH	LIC	Jijiga	ETH.9.3.5_1	3	2	392k pop on GIS 2020, may be plausible given timeframe and some smaller towns surrounding	0.569781	2013	52	2013	20	2013			0	2013	0	2013	0	2013	0	2013
WABI_055	Ethiopia	ETH	LIC	Jimma	ETH.8.8.6_1	3	2	425k pop on GIS likely due to therr extended area of the L3s some dense pops surounding jimma, matches google	0.248487	2013	40	2013	7	2013			0	2013	0	2013	0	2013	0	2013
WABI_056	Egypt	EGY	LMC	Kafr El Sheikh City	EGY.23.7_1	2	2	656k pop, covers the city and extra densly populated space that surrounds	0.997391	2012	100	2012	5	2012			0	2012	0	2012	0	2012	0	2012
WABI_057	China	CHN	UMC	Lanzhou	CHN.5.7_1	2	2	4.2 mill pop on GIS big change but is likely due to the wider boundry around the city	1.04934	2018	100	2018	12	2018							100	2018	100	2018
WABI_058	South Africa	ZAF	UMC	Mangaung	ZAF.2.3.1_1	3	1	853k pop reasonable increase	0.806436	2015	90	2015	11.5	2015			0	2015	0	2015	0	2015	92	2015
WABI_059	South Africa	ZAF	UMC	Mbombela	ZAF.6.1.2_1	3	1	715k pop on GIS plausible increase correct location	0.6	2015	30	2015	16	2015			0	2015	0	2015	0	2015	60	2015
WABI_060	South Africa	ZAF	UMC	Msunduzi	ZAF.4.6.5_1	3	1	681k pop on GIS plausible increase correct location	0.444781	2015	77	2015	10	2015			0	2015	0	2015	0	2015	76	2015
WABI_061	Egypt	EGY	LMC	Sanmannoud City	EGY.5.8_1	2	2	spelt Samannnud on GIS, pop 384k, whixh is much higher but seems to be the rigfht place matching google and covers the entire city and more which may explain the increase, no L3s.	0.856936	2012	100	2012	6	2012			0	2012	0	2012	0	2012	0	2012
WABI_062	Egypt	EGY	LMC	Senuris city	EGY.4.5_1	2	2	601k pop on GIS called sinnerus but seen online that Senuris is in the level one area it is here. Covers sinnerus but also some surrounding areas so may be the reason for the high pop	0.691473	2012	100	2012	5	2012			0	2012	0	2012	0	2012	10	2012
WABI_063	Egypt	EGY	LMC	Shebin El Qanater City	EGY.12.9_1	2	2	544k pop, level very big so likely to include other urban areas	0.686779	2012	100	2012	13.5	2012			0	2012	0	2012	0	2012	0	2012
WABI_064	Egypt	EGY	LMC	Suez City	EGY.15_1	1	1	670k pop plausible increase	0.607345	2012	100	2012	0	2012			0	2012	0	2012	0	2012	0	2012
WABI_065	China	CHN	UMC	Suzhou	CHN.15.7_1	2	1	5.3mill pop on GIS reasonable increae in timeframe	1.53624	2018	100	2018	20	2018							73	2018	100	2018
WABI_066	China	CHN	UMC	Taian	CHN.23.12.4_1	3	2	1.8mil pop on GIS perhaps due to dense outskirt areas	1.12701	2018	100	2018	16	2018							64	2018	100	2018
WABI_067	Egypt	EGY	LMC	Tanta city	EGY.5.9_1	2	2	729k npop onm GIS bit of a large increase but may be plausible given the extended time frmae. Seems to be in the correct place	0.939148	2012	100	2012	6	2012			0	2012	0	2012	0	2012	50	2012
WABI_068	Ethiopia	ETH	LIC	Woldia	ETH.3.11.5_1	3	2	243k pop on GIS, other data suggests 86k pop and location mathches with google so think is the right place. Boundry quite large and includes aanother urban area which may explain change in pop	0.25079	2013	10	2013	27	2013			0	2013	0	2013	0	2013	0	2013
WABI_069	Ethiopia	ETH	LIC	Woliso	ETH.8.4.12_1	3	2	260k pop, l3 boundry contains other urban areas which likelyt explain the pop change. Matches google for location	0.250228	2013	30	2013	5	2013			0	2013	0	2013	0	2013	0	2013
WABI_070	Ethiopia	ETH	LIC	Wolkite	ETH.10.12.8_1	3	2	118k pop on GIS, other populated areas surrounding the town may explain increase. Matches google location	0.249066	2013	40	2013	7	2013			0	2013	0	2013	0	2013	0	2013
WABI_071	Ethiopia	ETH	LIC	Wuqro	ETH.11.4.6_1	3	2	179k pop, other populated areas surrounding the town may explain increase. Matches google location	0.249619	2013	50	2013	5	2013			0	2013	0	2013	0	2013	0	2013
WABI_072	China	CHN	UMC	Xian	CHN.22.7.6_1	3	1	5.2mill pop seems reasonable difference, area covers the city centre	1.70789	2018	100	2018	13	2018							94	2018	100	2018
WaW_001	Afghanistan	AFG	LIC	Jalalabad	AFG.22.9_1	2	1		0.520246	2017	95	2017	5.64561	2017			0	2017	0	2017	0	2017	0	2017
WaW_002	Afghanistan	AFG	LIC	Kandahar	AFG.15.5_1	2	1		0.813219	2017	95	2017	9.64252	2017			0	2017	0	2017	0	2017	0	2017
WaW_003	Afghanistan	AFG	LIC	Mazar-E-Sharif	AFG.4.11_1	2	2	Population differs with GIS population but believed to be same place	0.237743	2017	95	2017	10.6613	2017			0	2017	0	2017	0	2017	0	2017
WaW_004	Afghanistan	AFG	LIC	Kabul	AFG.14.6_1	2	2	Population differs with GIS population but believed to be same place	1.47297	2016	75	2016	11.1111	2016			0	2016	0	2016	0	2016	0	2016
WaW_005	Afghanistan	AFG	LIC	Herat	AFG.12.7_1	2	2	Population greatly differs with GIS population but believed to be same place	0.784262	2017	95	2017	12.0612	2017			0	2017	0	2017	0	2017	0	2017
WaW_006	Albania	ALB	UMC	Vlora	ALB.12.3.13_1	3	1		1.53858	2014	85	2014	11.1	2014			0	2014	0	2014	0	2014	0	2014
WaW_007	Albania	ALB	UMC	Korca	ALB.7.3.4_1	3	1		1.12477	2017	100	2017	11	2017			0	2017	0	2017	0	2017	100	2017
WaW_008	Algeria	DZA	UMC	Algiers	DZA.4_1	1	2	Population is a bit smaller than GIS population. Added to level 1 as best fit	1.30742	2016	100	2016	16.88	2016			1.11111	2016					91.3366	2016
WaW_009	Algeria	DZA	UMC	Mostaganem	DZA.30.17_1	2	2	Population is a much larger than GIS population but area shows a good match	0.608828	2006			10.5	2006
WaW_010	American Samoa	ASM	UMC	Pago Pago	ASM.1_1	1	3	No population in data to check matching of city. Lv1 chosen as other areas are believed to be likely too small an area to manage waste independently.					12.8
WaW_011	Angola	AGO	LMC	Luanda	AGO.11_1	1	1	Data added to level 1 as better match than level 2 to city boundaries.	0.8	2009			12	2009
WaW_012	Argentina	ARG	UMC	Cordoba	ARG.6.2_1	2	1		1.07708	2010	93.5	2010	14	2010			0	2010	0.68	2010	0	2010	69.7946	2010
WaW_013	Argentina	ARG	UMC	Ciudada Autonomous De Buenos Aires	ARG.5.1_1	1 or 2	1		2.37152	2010	98.1	2010	16	2010									64.5815	2010
WaW_014	Argentina	ARG	UMC	Rosario	ARG.21.12_1	2	1		1.53511	2010	65.6	2010	11.5358	2010			14.5608	2010	0	2010	0	2010	100	2010
WaW_017	Australia	AUS	HIC	Perth	AUS.11.101_1	2	1						8.17547						18
WaW_018	Australia	AUS	HIC	Melbourne	AUS.10.44_1+AUS.10.31_1+AUS10.42_1+AUS.10.50_1+AUS.10.52_1+AUS.10.18_1+AUS.10.78_1+AUS.10.9_1+AUS.10.64_1+AUS.10.59_1+AUS.10.7_1+AUS.10.22_1+AUS.10.9_1+AUS.10.4_1+AUS.10.18_1+AUS.10.52_1+AUS.10.50_1+AUS.10.42_1+AUS.10.31_1+AUS.10.10_1+AUS.10.35_1+AUS.10.49_1+AUS.10.74_1+AUS.10.40_1+AUS.10.43_1+AUS.10.26_1+AUS.10.20_1+AUS.10.14_1	2	2	Population is of the wider urban agglomeration (from cities codebook). Level 2 splits Melbourne into several district. These are assumed to all represent the data point					15.3285				0		25.81		0		100
WaW_019	Australia	AUS	HIC	Canberra	AUS.2.1_1	2	1	Also called Unincorporated Australiam Capital Territory	2.71163	2010			4	2010			0	2010	70	2010	0	2010	93.3333	2010
WaW_020	Austria	AUT	HIC	Vienna	AUT.9_1	1	1		1.63145	2013	100	2013	2.9	2013
WaW_021	Azerbaijan	AZE	UMC	Baku	AZE.1.2_1	2	1		2.26878	2013	50.77	2013	10.3896	2013			0	2013	0	2013	39.9703	2013	100	2013
WaW_023	Bangladesh	BGD	LMC	Patuakhali	BGD.1.5.7_1	3	2	Data added to level 3 although GIS population bigger and covers larger area. Upazila deemed best fit for waste data	0.366702	2012	60	2012	2.88971	2012			0	2012	0	2012	0	2012	0	2012
WaW_024	Bangladesh	BGD	LMC	Rajshahi	BGD.5.7.3_1	3	2	Data added to level 3 although GIS population smaller as believed to cover correct area and has a closer match with the GIS population than level 2.	0.340274	2012	72	2012	4.05081	2012			0	2012	0	2012	0	2012	0	2012
WaW_025	Bangladesh	BGD	LMC	Rangpur	BGD.6.7.7_1	3	2	Data added to level 3 although GIS population bigger and covers larger area. Upazila deemed best fit for waste data	0.756238	2012	32	2012	4.54909	2012			0	2012	0	2012	0	2012	0	2012
WaW_026	Bangladesh	BGD	LMC	Chittagong	BGD.2.4.4_1+BGD.2.4.2_1+BGD.2.4.19_1+BGD.2.4.18_1+BGD.2.4.17_1+BGD.2.4.14_1+BGD.2.4.13_1+BGD.2.4.11_1+BGD.2.4.9_1+BGD.2.4.8_1+BGD.2.4.7_1	3	2	City split into several level 3's so joined these to represent the City corporation.	0.809519	2012	42	2012	7.21072	2012			1.4194	2012	0	2012	0	2012	0	2012
WaW_027	Bangladesh	BGD	LMC	Dhaka	BGD.3.1.4_1+BGD.3.1.3_1+BGD.3.1.2_1+BGD.3.1.1_1+BGD.3.1.46_1+BGD.3.1.45_1+BGD.3.1.44_1+BGD.3.1.42_1+BGD.3.1.43_1+BGD.3.1.41_1+BGD.3.1.40_1+BGD.3.1.39_1+BGD.3.1.38_1+BGD.3.1.37_1+BGD.3.1.35_1+BGD.3.1.34_1+BGD.3.1.33_1+BGD.3.1.32_1+BGD.3.1.31_1+BGD.3.1.30_1+BGD.3.1.28_1+BGD.3.1.27_1+BGD.3.1.25_1+BGD.3.1.26_1+BGD.3.1.24_1+BGD.3.1.23_1+BGD.3.1.22_1+BGD.3.1.20_1+BGD.3.1.19_1+BGD.3.1.18_1+BGD.3.1.17_1+…	3	2	City split into several level 3's so joined these to represent the City corporation.			44	2005	4.1	2005			0	2005	0	2005	0	2005	0	2005
WaW_028	Belarus	BLR	UMC	Grodno	BLR.3.5_1	2	1	Also called Hrodna	1.20056	2016	99	2016	8.6	2016			0	2016	0.6	2016	0	2016	100	2016
WaW_029	Belarus	BLR	UMC	Minsk	BLR.5.11_1	2	1		1.62441	2016	100	2016	10.0958	2016			0	2016	0	2016	0	2016	97	2016
WaW_030	Belgium	BEL	HIC	Liege	BEL.3.3.2_1	3	2	Data population slightly higher than GIS but there is a good match with the city boundary	1.41016	2014	100	2014					17	2014	53	2014	26	2014	100	2014
WaW_031	Belgium	BEL	HIC	Brussels	BEL.1.1.1_1	3	1		1.11417	2013	100	2013	11	2013
WaW_032	Belize	BLZ	UMC	San Pedro	BLZ.3_1	1	2	Level 1 (regional level) is the maximum granularity of admin layers. The data point was assumed representative of the region.	1.95934	2015	57.6	2015	13	2015			0	2015	0	2015	0	2015	100	2015
WaW_033	Belize	BLZ	UMC	Belize City	BLZ.1_1	1	2	Level 1 (regional level) is the maximum granularity of admin layers. The data point was assumed representative of the region.	1.9858	2015	66	2015	21	2015			0	2015	0	2015	0	2015	100	2015
WaW_034	Benin	BEN	LIC	Porto Novo	BEN.10_1	1	2	Data added to level 1 despite the level 1 the area being much bigger than the city, therefore data assumed representative of the larger area. Also called Oueme			25	2000
WaW_035	Benin	BEN	LIC	Cotonou	BEN.8.1_1	2	1				50	2000	4.43	2000
WaW_036	Bhutan	BTN	LMC	Thimphu	BTN.14.1_1	2	2	Thimphu split into a few disitrcts but the district selected (Chang) covers the majortiy of the city	0.516046	2016	95	2016	13.4865	2016			8.88889	2016	0	2016	0	2016	0	2016
WaW_037	Bhutan	BTN	LMC	Phuentsholing	BTN.2.10_1	2	1		0.447368	2014	95	2014	12.0879	2014			0	2014	0	2014	0	2014	100	2014
WaW_038	Bolivia	BOL	LMC	La Paz	BOL.4.17.3_1	3	1	Good match with population and municipal level according to GADM	0.733513	2010	90	2010	15.2	2010			1.11111	2010					100	2010
WaW_039	Bosnia and Herzegovina	BIH	UMC	Banja Luka	BIH.3.1.1_1	3	1		1.22887	2015	81.65	2015	22.2777	2015			0	2015	0	2015	0	2015	100	2015
WaW_040	Bosnia and Herzegovina	BIH	UMC	Sarajevo	BIH.2.6_1	2	2	Sarajevo city is comprised of several level 3 districts. Instead added this data point to level 2 although this is bigger than the city as was closer match to th epopulation recorded	1.3266	2014	95	2014	2.51256	2014
WaW_041	Botswana	BWA	UMC	Gaborone	BWA.4_1	1	2	Data population bigger than GIS but areas seems to match	0.7	2011			4.5	2011
WaW_042	Brazil	BRA	UMC	Rio De Janeiro	BRA.19.67_1	2	1		1.43	2014	100	2014	21.2371	2014			0	2014	0.5	2014	0	2014	100	2014
WaW_043	Brazil	BRA	UMC	Brasilia	BRA.7.1_1	2	1		0.784525	2016	98	2016	14.6707	2016			0	2016	0	2016	0	2016	100	2016
WaW_044	Brazil	BRA	UMC	Sao Paulo	BRA.25.564_1	2	1		1.1068	2014	97.8	2014	10.101	2014			3	2014	0	2014	0	2014	81.4433	2014
WaW_047	Burkina Faso	BFA	LIC	Bobo Dioulasso	BFA.9.1.2_1	3	2	GIS population higher than that of this data but believed to be correct scale
WaW_048	Burkina Faso	BFA	LIC	Ouagadougou	BFA.7.1.4_1	3	2	GIS population higher than that of this data but believed to be correct scale			47.1	2003	10	2003
WaW_049	Burundi	BDI	LIC	Muyinga	BDI.13.6_1	2	2	Population data changed from original due to error in that reported. See comment in population cell.	0.112134	2013							0	2013	0	2013	0	2013	0	2013
WaW_050	Burundi	BDI	LIC	Kayanza	BDI.9.5_1	2	2	Population data changed from original due to error in that reported. See comment in population cell.	0.113108	2013
WaW_051	Burundi	BDI	LIC	Ngozi	BDI.15.6_1	2	2	GIS population is much higher than data population, but cross comparison on GIS seems to match	0.463845	2013							0	2013	0	2013	0	2013	0	2013
WaW_052	Burundi	BDI	LIC	Bujumbura	BDI.2_1	1	2	GIS population is slightly higher. Data allocated to level 1 as has best match with city boundaries	1.4	2013	14	2013					0	2013	0	2013	0	2013	0	2013
WaW_053	Cote d Ivoire	CIV	LMC	Abidjan	CIV.1.1.1_1	3	1	Good match with population and city boundaries.	0.79221	2010	48	2010	7.84314	2010
WaW_054	Cambodia	KHM	LMC	Phnom Penh	KHM.16_1	1	1	Added to level 1 due to Phnom Penh being a special administrative unit essentially acting as a municipality	1.12652	2015	84	2015	6	2015			0.15	2015	0	2015	0	2015	0	2015
WaW_055	Cameroon	CMR	LMC	Limbe	CMR.9.1_1	2	2	Added to department level (Lv2) as Lv3 splits Limbe					12.4
WaW_056	Cameroon	CMR	LMC	Douala	CMR.5.4_1	2	1	Also called Wouri			60	2000
WaW_057	Cameroon	CMR	LMC	Yaounde	CMR.2.7_1	2	2	GIS population slightly lower. Also called Mfoundi	1.01798	2012	43	2012
WaW_058	Cameroon	CMR	LMC	Bafoussam	CMR.8.6_1	2	1	Population better matches Lv3 but boundary better matches Lv2. Chose Lv2 as matches other city levels in country.
WaW_059	Canada	CAN	HIC	Ottawa	CAN.9.35_1	2	1		0.953083	2013			7.3	2013					42.5	2013
WaW_060	Canada	CAN	HIC	Toronto	CAN.9.50_1	2	1		0.922407	2016			10.9671	2016			3.49009	2016	47.91	2016	0	2016	100	2016
WaW_061	Canada	CAN	HIC	Vancouver	CAN.2.14_1	2	1		1.01087	2014			17	2014
WaW_062	Chile	CHL	HIC	Santiago De Chile	CHL.14.5_1	2	3	Santiago is split into multiple districts at all levels. Think Santiago at level 2 OR 3 best matches but data population is much bigger than GIS population.	1.22561	2013	98	2013	9.52381	2013			0	2013	0	2013	0	2013	100	2013
WaW_063	China	CHN	UMC	Beijing	CHN.2.1_1	2	1	Data poitn matches best with level 2.	1.06221	2015			12.7	2015			2	2015	0	2015	8	2015	100	2015
WaW_064	Colombia	COL	UMC	Cali	COL.30.32_1	2	1		0.832911	2009	99	2015	3.21	2015			0	2015	15	2015	0	2015	100	2015
[truncated: 508 more rows]

## Sheet: 05_Duplicate_identification
											Short_name:	Waste_gen_rate	Waste_gen_rate_yr	Col_cov	Col_cov_yr	Plastic_MSW	Plastic_MSW_yr	Plastic_rigid	Plastic_rigid_yr	Other_recv	Other_Recv_yr	Form_dry_recy	Form_dry_recy_yr	Incin	Incin_yr	Cont_disp	Cont_disp_yr	Cont_fac	Cont_fac_yr
[truncated: 679 more rows]

[truncated: 15 more sheets: 06_Duplicate_processing, 07_Duplicates_removed, 08_Data_level_analysis, 09_Incorrect_level_actions, 10_Incorrect_levels_removed, 11.1_Outliers-Generation, 11.2_Outliers-Collection_cov, 11.3_Outliers-Plastic, 11.4_Outliers-Formal_dry_recy, 11.5_Outliers-Other_recovery, 11.6_Outliers-Incineration, 11.7_Outliers-Controlled_disp, 12_Cleaned_dataset, 13_Cleaned_dataset_(no_blanks), 14_FINAL_DATASET_(updated_IDs)]
