# Supplementary material for: A local-to-global emissions inventory of macroplastic pollution
Source: Research Square preprint supplement (doi:10.21203/rs.3.rs-3376960/v1), 2023-10-23
Supplement: Supplementary file 4 [file 638835024c863828276fffde.docx]

**Supplementary information guide**

**Supplementary information: Supplementary_information.pdf**

Detailed materials and methods.

**Supplementary Table 1: ST_01_SPOT_Data_Cleaning.xls**

Steps undertaken to check data for errors, clean, harmonize and allocate to spatial vectors.

**Supplementary Table 2: ST_02_SPOT_System_of_equations.xls**

System of equations for the material flow system.

**Supplementary Table 3: ST_03_SPOT_MFA_Outputs_National.xls**

Data predicted by probabilistic MFA at municipal level are aggregated to national level. Basic statistics (min, max, mean, median, upper & lower quartiles) presented.

**Supplementary Table 4: ST_04_MFA_Outputs_Global_Regional_Income.xls**

Data predicted by probabilistic MFA at municipal level are aggregated by total (global), UN region, UN sub-region, OECD region, World Bank income category. Basic statistics (min, max, mean, median, upper & lower quartiles) presented.
