# Supplementary material for: A local-to-global emissions inventory of macroplastic pollution
Source: Research Square preprint supplement (doi:10.21203/rs.3.rs-3376960/v1), 2023-10-23
Supplement: Supplementary file 5 [file d4ffa152a792cdc596d853c6.xlsx]

## Sheet: 00_Info
	Supplementary material for	A local-to-global emissions inventory of macroplastic pollution
	Software	Spatio-temporal plastic pollution origins and transport model (SPOT)
	Software version number	V1.0.0-G-092023
	Release date	2023-09-21
	Dataset name	ST_04_SPOT_MFA_Outputs_Global_Regional_Income.xls
	Authors	DBPR
	Correspondence	DBPR
	Correspondence to	DBPR
	Dataset description	Data predicted by probabilistic MFA at municipal level are aggregated by total (global), UN region, UN sub-region, OECD region, World Bank income category. Basic statistics (min, max, mean, median, upper & lower quartiles) presented.
	Contents
	01_Processes	Process mass presented by global, regional and income category level.
	01a_Processes_legend	Legend for 01_Processes.
	02_Coefficients	Coefficients are calculated from process mass.
	02a_Coefficients_legend	Legend for 02_Coefficients.
	03_Outputs	Summary outputs derived from process mass.
	03a_Outputs_legend	Legend for 03_Outputs.

## Sheet: 01_Processes
				Process short name:	Generated_MSW_trib	Collected_MSW_trib	Disp_MSW_trib	Dry_recy_form_trib	Other_recv_trib	Incin_trib	Treat_recover_trib	Controlled_disp_trib	Uncollected_trib	Uncontrolled_disp_trib	Generated_MSW	Litter	Generated_MSW_exc_litter	Uncollected_MSW	Collected_MSW	Col_emissions	Col_deliver	Disp_MSW	Treat_recover_MSW	Uncontrolled_disp	Controlled_disp	Other_treat_MSW	Incin	Dry_recy	Dry_recy_inf	Dry_recy_form_trib	Disp_uncontrolled_unburnt	Disp_uncontrolled_burnt	Disp_uncontrolled_unburnt_retained	Disp_emissions	Uncol_unburnt	Uncol_burnt	Misman	Litter_plastic	Litter_rigid	Litter_flex	Col_emissions_plastic	Col_emissions_rigid	Col_emissions_flex	Dry_recy_inf_plastic	Dry_recy_inf_rigid	Dry_recy_inf_flex	Dry_recy_form_plastic	Dry_recy_form_rigid	Dry_recy_form_flex
				Units:	t·y-1	t·y-1	t·y-1	t·y-1	t·y-1	t·y-1	t·y-1	t·y-1	t·y-1	t·y-1	t·y-1	t·y-1	t·y-1	t·y-1	t·y-1	t·y-1	t·y-1	t·y-1	t·y-1	t·y-1	t·y-1	t·y-1	t·y-1	t·y-1	t·y-1	t·y-1	t·y-1	t·y-1	t·y-1	t·y-1	t·y-1	t·y-1	t·y-1	t·y-1	t·y-1	t·y-1	t·y-1	t·y-1	t·y-1	t·y-1	t·y-1	t·y-1	t·y-1	t·y-1	t·y-1
Statistic	Aggregation_lv1	Aggregation_lv2	Population_2020	Rural_share	tP1	tP2	tP3	tP4i	tP4ii	tP4iii	tP4	tP5	tP8	tP9	P1	P2	P3	P4	P5	P6	P7	P8	P9	P10	P11	P12i	P12ii	P13	P14	P15	P16	P17	P18	P19	P20	P21	P100	P2a	P2aa	P2ab	P6a	P6aa	P6ab	P14a	P14aa	P14ab	P15a	P15aa	P15ab
Mean	World	World	7.83433e+09	0.202025	2.14941e+09	1.79992e+09	1.41503e+09	1.52585e+08	2.75718e+07	2.04737e+08	3.84893e+08	8.11105e+08	3.4949e+08	6.03925e+08	2.33256e+09	1.02356e+07	2.32233e+09	3.4949e+08	1.97284e+09	8.46612e+06	1.96437e+09	1.41503e+09	5.49341e+08	6.03925e+08	8.11105e+08	2.75718e+07	2.04737e+08	3.17033e+08	1.64448e+08	1.52585e+08	4.88547e+08	1.15378e+08	4.88046e+08	501588	1.87331e+08	1.6216e+08	9.72117e+08	1.79122e+06	1.30371e+06	487514	924712	404936	519776	4.98093e+07	2.63954e+07	2.34139e+07	1.29683e+07	7.95038e+06	5.01791e+06
Min	World	World	7.83433e+09	0.202025	2.1182e+09	1.77071e+09	1.39169e+09	1.42716e+08	2.3621e+07	1.91357e+08	3.66914e+08	7.92213e+08	3.40349e+08	5.89703e+08	2.29864e+09	1.00583e+07	2.28849e+09	3.40349e+08	1.941e+09	8.2196e+06	1.93266e+09	1.39169e+09	5.29931e+08	5.89703e+08	7.92213e+08	2.3621e+07	1.91357e+08	3.03842e+08	1.56909e+08	1.42716e+08	4.7674e+08	1.08548e+08	4.76255e+08	468395	1.79975e+08	1.557e+08	9.56549e+08	1.75957e+06	1.28031e+06	478911	893787	390489	500494	4.6943e+07	2.48911e+07	2.18099e+07	1.21543e+07	7.45242e+06	4.62836e+06
Lower quartile	World	World	7.83433e+09	0.202025	2.1434e+09	1.79387e+09	1.41022e+09	1.50597e+08	2.66349e+07	2.01856e+08	3.81239e+08	8.07013e+08	3.4765e+08	6.01496e+08	2.32637e+09	1.02019e+07	2.31613e+09	3.4765e+08	1.96667e+09	8.42001e+06	1.9582e+09	1.41022e+09	5.4544e+08	6.01496e+08	8.07013e+08	2.66349e+07	2.01856e+08	3.14512e+08	1.62907e+08	1.50597e+08	4.86137e+08	1.13887e+08	4.85634e+08	494752	1.85911e+08	1.60836e+08	9.69379e+08	1.7852e+06	1.29931e+06	485863	918264	402090	515833	4.92567e+07	2.60288e+07	2.3072e+07	1.27869e+07	7.83585e+06	4.93979e+06
Median	World	World	7.83433e+09	0.202025	2.14934e+09	1.79989e+09	1.41497e+09	1.52539e+08	2.74973e+07	2.04787e+08	3.84871e+08	8.10968e+08	3.49513e+08	6.03922e+08	2.33259e+09	1.02355e+07	2.32236e+09	3.49513e+08	1.97275e+09	8.46503e+06	1.96429e+09	1.41497e+09	5.49278e+08	6.03922e+08	8.10968e+08	2.74973e+07	2.04787e+08	3.16986e+08	1.64374e+08	1.52539e+08	4.88557e+08	1.15333e+08	4.88052e+08	501450	1.87294e+08	1.62203e+08	9.72214e+08	1.79114e+06	1.30366e+06	487468	924438	404814	519610	4.97858e+07	2.63794e+07	2.33944e+07	1.29623e+07	7.94724e+06	5.01324e+06
Upper quartile	World	World	7.83433e+09	0.202025	2.15544e+09	1.80608e+09	1.41986e+09	1.54483e+08	2.84221e+07	2.07497e+08	3.8854e+08	8.15166e+08	3.51273e+08	6.06287e+08	2.33877e+09	1.02681e+07	2.32853e+09	3.51273e+08	1.97898e+09	8.51142e+06	1.97051e+09	1.41986e+09	5.53287e+08	6.06287e+08	8.15166e+08	2.84221e+07	2.07497e+08	3.19436e+08	1.65946e+08	1.54483e+08	4.90912e+08	1.16835e+08	4.904e+08	507864	1.88728e+08	1.63443e+08	9.74707e+08	1.79702e+06	1.308e+06	489135	931087	407799	523585	5.03431e+07	2.67428e+07	2.37306e+07	1.31405e+07	8.06171e+06	5.09221e+06
Max	World	World	7.83433e+09	0.202025	2.18159e+09	1.83086e+09	1.44178e+09	1.63977e+08	3.41762e+07	2.19844e+08	4.0329e+08	8.33068e+08	3.5997e+08	6.1918e+08	2.36713e+09	1.04288e+07	2.35686e+09	3.5997e+08	2.00409e+09	8.72562e+06	1.99557e+09	1.44178e+09	5.69937e+08	6.1918e+08	8.33068e+08	3.41762e+07	2.19844e+08	3.31489e+08	1.72962e+08	1.63977e+08	5.02858e+08	1.23775e+08	5.02357e+08	546638	1.95534e+08	1.69868e+08	9.85857e+08	1.82627e+06	1.32908e+06	497189	971253	427548	543705	5.36079e+07	2.867e+07	2.6211e+07	1.39317e+07	8.52743e+06	5.47968e+06
Mean	Income category	HIC	1.21752e+09	0.234527	6.51881e+08	6.51597e+08	4.06294e+08	1.49164e+08	1.27591e+07	8.33797e+07	2.45303e+08	4.02802e+08	283976	3.49216e+06	6.53307e+08	454071	6.52853e+08	283976	6.52569e+08	424665	6.52144e+08	4.06294e+08	2.45851e+08	3.49216e+06	4.02802e+08	1.27591e+07	8.33797e+07	1.49712e+08	547223	1.49164e+08	2.82392e+06	668237	2.821e+06	2917.62	180158	103818	4.65487e+06	79462.5	57835.4	21627.1	50159.5	30940.6	19218.9	15415.6	8176.17	7239.39	1.26776e+07	7.82088e+06	4.85669e+06
Min	Income category	HIC	1.21752e+09	0.234527	6.32644e+08	6.32344e+08	3.88244e+08	1.39222e+08	9.66118e+06	7.55719e+07	2.32352e+08	3.85552e+08	169568	1.52282e+06	6.34044e+08	436899	6.33598e+08	169568	6.33299e+08	399239	6.32887e+08	3.88244e+08	2.3289e+08	1.52282e+06	3.85552e+08	9.66118e+06	7.55719e+07	1.39773e+08	513962	1.39222e+08	702562	25977.7	701838	111.514	103133	58599.6	2.67047e+06	76255	55474.2	20780.8	46847.7	28965.2	17825.4	13335.3	6693.9	5959.23	1.18653e+07	7.31546e+06	4.47397e+06
Lower quartile	Income category	HIC	1.21752e+09	0.234527	6.48033e+08	6.47747e+08	4.0262e+08	1.47147e+08	1.19662e+07	8.16479e+07	2.42581e+08	3.99295e+08	255111	2.58715e+06	6.49458e+08	450727	6.49007e+08	255111	6.4872e+08	420162	6.483e+08	4.0262e+08	2.43127e+08	2.58715e+06	3.99295e+08	1.19662e+07	8.16479e+07	1.47696e+08	541056	1.47147e+08	2.06812e+06	364114	2.06523e+06	1604.38	160550	91548.7	3.75529e+06	78855.5	57394.1	21462.6	49503.1	30520.7	18944.8	14799.2	7764.08	6861.97	1.24974e+07	7.70756e+06	4.77916e+06
Median	Income category	HIC	1.21752e+09	0.234527	6.51799e+08	6.51525e+08	4.06229e+08	1.4913e+08	1.26345e+07	8.3228e+07	2.45245e+08	4.02628e+08	280623	3.22251e+06	6.53225e+08	454044	6.52771e+08	280623	6.52495e+08	424657	6.52071e+08	4.06229e+08	2.45802e+08	3.22251e+06	4.02628e+08	1.26345e+07	8.3228e+07	1.49675e+08	547229	1.4913e+08	2.59634e+06	566723	2.59376e+06	2446.67	177224	102085	4.38202e+06	79469.2	57839.1	21627.5	50142.5	30929.8	19212.5	15313.9	8077.94	7167.37	1.2673e+07	7.81871e+06	4.85057e+06
Upper quartile	Income category	HIC	1.21752e+09	0.234527	6.55754e+08	6.55475e+08	4.09867e+08	1.51065e+08	1.34261e+07	8.49407e+07	2.47924e+08	4.0627e+08	309546	4.33462e+06	6.57182e+08	457264	6.56725e+08	309546	6.56443e+08	429011	6.5602e+08	4.09867e+08	2.48468e+08	4.33462e+06	4.0627e+08	1.34261e+07	8.49407e+07	1.51617e+08	553353	1.51065e+08	3.45911e+06	857263	3.45529e+06	3758.65	197642	113863	5.49395e+06	80027.4	58247.7	21781.2	50793.1	31338.2	19472	15922.6	8496.88	7527.39	1.2852e+07	7.93096e+06	4.93085e+06
Max	Income category	HIC	1.21752e+09	0.234527	6.72003e+08	6.71743e+08	4.26025e+08	1.60367e+08	1.80189e+07	9.20366e+07	2.608e+08	4.2196e+08	459635	6.54274e+06	6.73456e+08	472653	6.72987e+08	459635	6.72727e+08	448737	6.72288e+08	4.26025e+08	2.61352e+08	6.54274e+06	4.2196e+08	1.80189e+07	9.20366e+07	1.60917e+08	577795	1.60367e+08	6.03196e+06	3.98727e+06	6.02687e+06	16282.6	285163	190300	7.77952e+06	82520.2	60027.7	22492.5	53824.8	33188.9	20729.1	19273.8	11234.7	10285.5	1.36025e+07	8.41153e+06	5.31151e+06
Mean	Income category	LIC	7.31313e+08	0.242077	1.18535e+08	4.73476e+07	4.70687e+07	32004.5	64788.4	182097	278890	1.05539e+06	7.11873e+07	4.60134e+07	1.29759e+08	2.2242e+06	1.27535e+08	7.11873e+07	5.63472e+07	953493	5.53938e+07	4.70687e+07	8.32501e+06	4.60134e+07	1.05539e+06	64788.4	182097	8.07812e+06	8.04612e+06	32004.5	3.72244e+07	8.78892e+06	3.71862e+07	38190.8	5.05745e+07	2.06128e+07	1.20378e+08	389209	283277	105932	86466.9	36336.5	50130.4	2.44435e+06	1.29499e+06	1.14936e+06	2713.81	1672.61	1041.2
Min	Income category	LIC	7.31313e+08	0.242077	1.14257e+08	4.37865e+07	4.35241e+07	37.613	61528.5	182097	244177	851399	6.74842e+07	4.24009e+07	1.25252e+08	2.12243e+06	1.23099e+08	6.74842e+07	5.26186e+07	859687	5.17311e+07	4.35241e+07	7.75209e+06	4.24009e+07	851399	61528.5	182097	7.50685e+06	7.46338e+06	37.613	3.4475e+07	7.62739e+06	3.444e+07	33335.4	4.74185e+07	1.87496e+07	1.16131e+08	371479	270250	100895	76713.7	31741.6	44242.8	2.23419e+06	1.14984e+06	998764	1.82869	0.454533	0.643721
Lower quartile	Income category	LIC	7.31313e+08	0.242077	1.17776e+08	4.66262e+07	4.63453e+07	13351.8	64084.7	182097	260305	1.00281e+06	7.04331e+07	4.52883e+07	1.28968e+08	2.20175e+06	1.26753e+08	7.04331e+07	5.55934e+07	933838	5.4655e+07	4.63453e+07	8.18455e+06	4.52883e+07	1.00281e+06	64084.7	182097	7.93783e+06	7.90743e+06	13351.8	3.66157e+07	8.52213e+06	3.65778e+07	37011.4	4.99693e+07	2.0209e+07	1.19599e+08	385289	280441	104839	84159.2	35299.3	48742.6	2.39225e+06	1.25937e+06	1.11584e+06	1114.29	666.619	415.642
Median	Income category	LIC	7.31313e+08	0.242077	1.18509e+08	4.73078e+07	4.70243e+07	27788.5	64754.1	182097	274750	1.04873e+06	7.12098e+07	4.59642e+07	1.29743e+08	2.22328e+06	1.27516e+08	7.12098e+07	5.63072e+07	952236	5.53561e+07	4.70243e+07	8.32102e+06	4.59642e+07	1.04873e+06	64754.1	182097	8.07405e+06	8.04137e+06	27788.5	3.71952e+07	8.7666e+06	3.71569e+07	38069.1	5.05556e+07	2.06048e+07	1.20355e+08	389042	283135	105898	86259.1	36214.7	49965.5	2.44036e+06	1.29147e+06	1.14632e+06	2318.95	1423.1	867.969
Upper quartile	Income category	LIC	7.31313e+08	0.242077	1.19297e+08	4.80372e+07	4.77577e+07	45572	65456.5	182097	292627	1.10341e+06	7.19428e+07	4.66956e+07	1.30552e+08	2.24623e+06	1.28306e+08	7.19428e+07	5.70615e+07	970933	5.6101e+07	4.77577e+07	8.45404e+06	4.66956e+07	1.10341e+06	65456.5	182097	8.20717e+06	8.17449e+06	45572	3.7822e+07	9.03307e+06	3.77824e+07	39240.1	5.11687e+07	2.1009e+07	1.21171e+08	393027	286039	106998	88476	37275.4	51311.9	2.49166e+06	1.32726e+06	1.17861e+06	3867.77	2387.37	1481.39
Max	Income category	LIC	7.31313e+08	0.242077	1.22247e+08	5.10956e+07	5.08449e+07	146355	68702.2	182097	393295	1.41133e+06	7.48271e+07	4.97096e+07	1.33655e+08	2.34107e+06	1.31348e+08	7.48271e+07	6.0126e+07	1.07423e+06	5.91184e+07	5.08449e+07	8.98927e+06	4.97096e+07	1.41133e+06	68702.2	182097	8.74325e+06	8.72058e+06	146355	4.03512e+07	1.07605e+07	4.03083e+07	45843.1	5.38028e+07	2.29313e+07	1.24173e+08	411350	299709	111640	107200	47370.3	59830.1	2.75318e+06	1.54704e+06	1.37984e+06	13262.5	8179.46	5638.85
Mean	Income category	LMC	3.17659e+09	0.196434	6.4773e+08	4.55138e+08	4.45874e+08	37343.1	8.96046e+06	266201	9.264e+06	4.46955e+07	1.92592e+08	4.01178e+08	7.34217e+08	5.00443e+06	7.29212e+08	1.92592e+08	5.3662e+08	4.17139e+06	5.32449e+08	4.45874e+08	8.65752e+07	4.01178e+08	4.46955e+07	8.96046e+06	266201	7.73485e+07	7.73112e+07	37343.1	3.2454e+08	7.66384e+07	3.24207e+08	333182	1.08931e+08	8.36609e+07	6.02946e+08	875777	637419	238359	441407	183720	257686	2.34874e+07	1.24441e+07	1.10433e+07	3174.18	1317.42	1856.76
Min	Income category	LMC	3.17659e+09	0.196434	6.36402e+08	4.4531e+08	4.362e+08	20740.4	7.10923e+06	266201	7.40622e+06	4.23624e+07	1.84369e+08	3.91544e+08	7.21525e+08	4.86871e+06	7.16565e+08	1.84369e+08	5.24771e+08	3.98433e+06	5.20686e+08	4.362e+08	8.18157e+07	3.91544e+08	4.23624e+07	7.10923e+06	266201	7.29941e+07	7.29564e+07	20740.4	3.14412e+08	7.0631e+07	3.14077e+08	308957	1.02425e+08	7.77748e+07	5.9212e+08	851935	620099	231836	417996	172543	242890	2.19583e+07	1.13707e+07	1.00708e+07	1731.13	733.112	979.802
Lower quartile	Income category	LMC	3.17659e+09	0.196434	6.45636e+08	4.53156e+08	4.43886e+08	33364.4	8.58026e+06	266201	8.8831e+06	4.43058e+07	1.91114e+08	3.99181e+08	7.31875e+08	4.97985e+06	7.26894e+08	1.91114e+08	5.34336e+08	4.13686e+06	5.30198e+08	4.43886e+08	8.55578e+07	3.99181e+08	4.43058e+07	8.58026e+06	266201	7.63924e+07	7.6358e+07	33364.4	3.2267e+08	7.54803e+07	3.22339e+08	327870	1.07649e+08	8.25426e+07	6.00888e+08	871342	634193	237161	436752	181629	254876	2.31376e+07	1.22118e+07	1.08319e+07	2822	1164.55	1647.16
Median	Income category	LMC	3.17659e+09	0.196434	6.47749e+08	4.55126e+08	4.45839e+08	37009.3	8.93605e+06	266201	9.23783e+06	4.46898e+07	1.92591e+08	4.01162e+08	7.3417e+08	5.00393e+06	7.29172e+08	1.92591e+08	5.36592e+08	4.17019e+06	5.32406e+08	4.45839e+08	8.65352e+07	4.01162e+08	4.46898e+07	8.93605e+06	266201	7.72918e+07	7.72551e+07	37009.3	3.24491e+08	7.66414e+07	3.24156e+08	333024	1.08923e+08	8.36793e+07	6.02945e+08	875704	637361	238324	441404	183639	257619	2.34797e+07	1.24355e+07	1.10331e+07	3148.29	1302.77	1841.73
Upper quartile	Income category	LMC	3.17659e+09	0.196434	6.49823e+08	4.57127e+08	4.47874e+08	40920.7	9.3172e+06	266201	9.62178e+06	4.50774e+07	1.94061e+08	4.03138e+08	7.36598e+08	5.02763e+06	7.31573e+08	1.94061e+08	5.38888e+08	4.20474e+06	5.34701e+08	4.47874e+08	8.75642e+07	4.03138e+08	4.50774e+07	9.3172e+06	266201	7.82876e+07	7.82525e+07	40920.7	3.26473e+08	7.77746e+07	3.26134e+08	338149	1.10174e+08	8.47798e+07	6.04964e+08	880072	640548	239534	445935	185733	260467	2.3822e+07	1.267e+07	1.12389e+07	3478.62	1446.75	2038.34
Max	Income category	LMC	3.17659e+09	0.196434	6.58656e+08	4.67347e+08	4.58051e+08	58655.8	1.12338e+07	266201	1.15247e+07	4.66682e+07	2.00743e+08	4.13255e+08	7.475e+08	5.14423e+06	7.42432e+08	2.00743e+08	5.5025e+08	4.36644e+06	5.46005e+08	4.58051e+08	9.31183e+07	4.13255e+08	4.66682e+07	1.12338e+07	266201	8.38584e+07	8.3821e+07	58655.8	3.37301e+08	8.3617e+07	3.3697e+08	362836	1.1576e+08	9.07823e+07	6.13171e+08	900676	655629	245309	469829	197312	275325	2.60765e+07	1.37297e+07	1.25793e+07	5149.53	2211.65	3041.04
Mean	Income category	UMC	2.7089e+09	0.181168	7.31269e+08	6.45842e+08	5.15794e+08	3.35078e+06	5.78736e+06	1.20909e+08	1.30047e+08	3.62553e+08	8.54271e+07	1.53241e+08	8.15282e+08	2.55284e+06	8.12729e+08	8.54271e+07	7.27302e+08	2.91658e+06	7.24385e+08	5.15794e+08	2.08591e+08	1.53241e+08	3.62553e+08	5.78736e+06	1.20909e+08	8.18943e+07	7.85435e+07	3.35078e+06	1.23959e+08	2.92824e+07	1.23832e+08	127297	2.76448e+07	5.77822e+07	2.44138e+08	446775	325179	121596	346679	153939	192740	2.38621e+07	1.26481e+07	1.1214e+07	284841	126515	158326
Min	Income category	UMC	2.7089e+09	0.181168	7.13362e+08	6.27033e+08	5.02959e+08	2.82199e+06	4.46317e+06	1.10911e+08	1.19484e+08	3.53524e+08	8.17369e+07	1.47818e+08	7.95114e+08	2.48997e+06	7.9259e+08	8.17369e+07	7.05805e+08	2.7982e+06	7.02948e+08	5.02959e+08	1.97039e+08	1.47818e+08	3.53524e+08	4.46317e+06	1.10911e+08	7.53154e+07	7.18926e+07	2.82199e+06	1.16685e+08	2.53399e+07	1.16565e+08	109723	2.58296e+07	5.54705e+07	2.38287e+08	436031	317360	118670	330536	146929	183607	2.16319e+07	1.14562e+07	1.00665e+07	217382	93999.6	123383
Lower quartile	Income category	UMC	2.7089e+09	0.181168	7.27279e+08	6.4195e+08	5.1365e+08	3.1963e+06	5.4324e+06	1.18522e+08	1.27507e+08	3.60678e+08	8.46389e+07	1.52131e+08	8.1105e+08	2.54187e+06	8.08506e+08	8.46389e+07	7.23208e+08	2.89252e+06	7.20302e+08	5.1365e+08	2.05844e+08	1.52131e+08	3.60678e+08	5.4324e+06	1.18522e+08	8.06973e+07	7.7345e+07	3.1963e+06	1.22789e+08	2.8397e+07	1.22661e+08	123456	2.72802e+07	5.72398e+07	2.43011e+08	444813	323741	121057	342948	152251	190658	2.3442e+07	1.23623e+07	1.0953e+07	269444	119463	149667
Median	Income category	UMC	2.7089e+09	0.181168	7.31266e+08	6.45776e+08	5.15826e+08	3.31556e+06	5.7268e+06	1.20894e+08	1.30064e+08	3.62527e+08	8.54231e+07	1.53229e+08	8.15309e+08	2.55255e+06	8.12768e+08	8.54231e+07	7.27237e+08	2.91568e+06	7.2434e+08	5.15826e+08	2.08511e+08	1.53229e+08	3.62527e+08	5.7268e+06	1.20894e+08	8.18069e+07	7.84539e+07	3.31556e+06	1.24002e+08	2.92202e+07	1.23874e+08	126936	2.76263e+07	5.77714e+07	2.44166e+08	446710	325128	121569	346456	153852	192622	2.3825e+07	1.26241e+07	1.11844e+07	283485	125796	157246
Upper quartile	Income category	UMC	2.7089e+09	0.181168	7.35359e+08	6.49921e+08	5.17966e+08	3.47582e+06	6.10347e+06	1.23278e+08	1.32585e+08	3.64408e+08	8.6213e+07	1.54385e+08	8.19481e+08	2.56348e+06	8.1692e+08	8.6213e+07	7.31389e+08	2.93953e+06	7.2846e+08	5.17966e+08	2.11289e+08	1.54385e+08	3.64408e+08	6.10347e+06	1.23278e+08	8.3024e+07	7.96622e+07	3.47582e+06	1.25192e+08	3.01154e+07	1.25069e+08	130827	2.79991e+07	5.83032e+07	2.45311e+08	448690	326561	122117	350218	155524	194740	2.42599e+07	1.29027e+07	1.1443e+07	297880	132495	165617
Max	Income category	UMC	2.7089e+09	0.181168	7.52195e+08	6.65378e+08	5.2804e+08	4.37817e+06	7.71481e+06	1.31957e+08	1.41713e+08	3.73515e+08	8.96679e+07	1.58922e+08	8.38768e+08	2.61273e+06	8.36172e+08	8.96679e+07	7.49173e+08	3.04973e+06	7.46268e+08	5.2804e+08	2.22209e+08	1.58922e+08	3.73515e+08	7.71481e+06	1.31957e+08	8.83973e+07	8.53451e+07	4.37817e+06	1.29775e+08	3.39837e+07	1.29641e+08	155613	2.96463e+07	6.05447e+07	2.50263e+08	456774	332177	124596	368612	164388	204224	2.62987e+07	1.4439e+07	1.29525e+07	383933	174208	212532
Mean	UN Region	Africa	1.36033e+09	0.224168	2.75714e+08	1.49001e+08	1.48259e+08	164982	394945	182097	742024	1.83461e+07	1.26714e+08	1.29913e+08	3.04716e+08	3.12555e+06	3.0159e+08	1.26714e+08	1.74877e+08	1.47941e+06	1.73397e+08	1.48259e+08	2.51384e+07	1.29913e+08	1.83461e+07	394945	182097	2.45614e+07	2.43964e+07	164982	1.05071e+08	2.48416e+07	1.04963e+08	107953	7.86117e+07	4.81019e+07	2.61231e+08	546932	398073	148859	144077	60503	83573.8	7.41363e+06	3.92963e+06	3.484e+06	14047.8	6705.07	7342.7
Min	UN Region	Africa	1.36033e+09	0.224168	2.68739e+08	1.42914e+08	1.42162e+08	125951	323415	182097	639389	1.68044e+07	1.20858e+08	1.23801e+08	2.97653e+08	3.00726e+06	2.94524e+08	1.20858e+08	1.68077e+08	1.36676e+06	1.66659e+08	1.42162e+08	2.3131e+07	1.23801e+08	1.68044e+07	323415	182097	2.25315e+07	2.23422e+07	125951	9.92283e+07	2.1485e+07	9.91223e+07	91011.5	7.42125e+07	4.42106e+07	2.53324e+08	525681	382402	143246	131653	55352.5	76044.3	6.70115e+06	3.45413e+06	3.0514e+06	6367.96	2285.58	3548.6
Lower quartile	UN Region	Africa	1.36033e+09	0.224168	2.74476e+08	1.47839e+08	1.47101e+08	146116	377542	182097	715766	1.80649e+07	1.25689e+08	1.28775e+08	3.0339e+08	3.10211e+06	3.00269e+08	1.25689e+08	1.73623e+08	1.45818e+06	1.72152e+08	1.47101e+08	2.46802e+07	1.28775e+08	1.80649e+07	377542	182097	2.41085e+07	2.39402e+07	146116	1.03903e+08	2.40929e+07	1.03797e+08	104607	7.76586e+07	4.72605e+07	2.59998e+08	542739	395031	147714	141293	59307	81885.9	7.25028e+06	3.82004e+06	3.38174e+06	11932.8	5520.51	6266.36
Median	UN Region	Africa	1.36033e+09	0.224168	2.75731e+08	1.49009e+08	1.48266e+08	161260	391087	182097	737992	1.83527e+07	1.26701e+08	1.2992e+08	3.04727e+08	3.12498e+06	3.01607e+08	1.26701e+08	1.74876e+08	1.47815e+06	1.73398e+08	1.48266e+08	2.51188e+07	1.2992e+08	1.83527e+07	391087	182097	2.45457e+07	2.43769e+07	161260	1.05041e+08	2.47911e+07	1.04931e+08	107742	7.85975e+07	4.81046e+07	2.61249e+08	546828	398006	148821	143857	60414.8	83438.9	7.40494e+06	3.91895e+06	3.47298e+06	13937.3	6554.02	7303.68
Upper quartile	UN Region	Africa	1.36033e+09	0.224168	2.76944e+08	1.50165e+08	1.49425e+08	179544	408941	182097	764401	1.86426e+07	1.27763e+08	1.31038e+08	3.06047e+08	3.14789e+06	3.02912e+08	1.27763e+08	1.76138e+08	1.49952e+06	1.74647e+08	1.49425e+08	2.55722e+07	1.31038e+08	1.86426e+07	408941	182097	2.49912e+07	2.48272e+07	179544	1.06233e+08	2.55523e+07	1.06124e+08	110936	7.95168e+07	4.89293e+07	2.62453e+08	550977	401019	150000	146632	61565.2	85148.8	7.56735e+06	4.03135e+06	3.57839e+06	15864.7	7722.2	8319.58
Max	UN Region	Africa	1.36033e+09	0.224168	2.82693e+08	1.55052e+08	1.54294e+08	280040	526860	182097	917425	1.96848e+07	1.32763e+08	1.36526e+08	3.12207e+08	3.24491e+06	3.0903e+08	1.32763e+08	1.81184e+08	1.60087e+06	1.79646e+08	1.54294e+08	2.75752e+07	1.36526e+08	1.96848e+07	526860	182097	2.70334e+07	2.68774e+07	280040	1.11293e+08	2.95411e+07	1.11178e+08	128304	8.41051e+07	5.25862e+07	2.68064e+08	567029	412794	154586	169644	72645	96999.3	8.38294e+06	4.62064e+06	4.07791e+06	27146.9	14966	13328.2
Mean	UN Region	Americas	1.02486e+09	0.204086	4.65374e+08	4.31454e+08	3.50363e+08	7.3797e+07	3.56133e+06	3.73185e+06	8.10902e+07	3.17078e+08	3.39201e+07	3.32855e+07	4.84486e+08	981963	4.83504e+08	3.39201e+07	4.49584e+08	882526	4.48702e+08	3.50363e+08	9.83382e+07	3.32855e+07	3.17078e+08	3.56133e+06	3.73185e+06	9.10451e+07	1.7248e+07	7.3797e+07	2.69279e+07	6.35764e+06	2.69002e+07	27670.2	1.25921e+07	2.1328e+07	6.90701e+07	171842	125072	46770.8	101021	47876.8	53144.4	5.18983e+06	2.75138e+06	2.43845e+06	6.27215e+06	3.83894e+06	2.43321e+06
Min	UN Region	Americas	1.02486e+09	0.204086	4.48836e+08	4.15125e+08	3.36865e+08	6.6088e+07	1.67418e+06	1.51211e+06	7.2508e+07	3.03955e+08	3.23697e+07	3.16617e+07	4.68142e+08	958026	4.6717e+08	3.23697e+07	4.33058e+08	841065	4.32175e+08	3.36865e+08	8.93247e+07	3.16617e+07	3.03955e+08	1.67418e+06	1.51211e+06	8.29047e+07	1.53678e+07	6.6088e+07	2.54061e+07	5.38292e+06	2.538e+07	23411.2	1.16586e+07	2.01964e+07	6.66615e+07	167468	121889	45579.6	95486	45216	50233.8	4.54583e+06	2.31682e+06	2.07618e+06	5.63199e+06	3.44822e+06	2.16805e+06
Lower quartile	UN Region	Americas	1.02486e+09	0.204086	4.61989e+08	4.28068e+08	3.47534e+08	7.22114e+07	3.00113e+06	3.08461e+06	7.92168e+07	3.14256e+08	3.36069e+07	3.29724e+07	4.81155e+08	976909	4.80178e+08	3.36069e+07	4.46234e+08	874591	4.45352e+08	3.47534e+08	9.64498e+07	3.29724e+07	3.14256e+08	3.00113e+06	3.08461e+06	8.941e+07	1.68377e+07	7.22114e+07	2.6596e+07	6.14614e+06	2.65691e+07	26683.7	1.24212e+07	2.11134e+07	6.86532e+07	170946	124421	46524	99880.5	47341	52512.9	5.03881e+06	2.64873e+06	2.34471e+06	6.12789e+06	3.74668e+06	2.37258e+06
Median	UN Region	Americas	1.02486e+09	0.204086	4.65288e+08	4.31425e+08	3.50312e+08	7.37672e+07	3.47754e+06	3.64152e+06	8.10612e+07	3.16997e+08	3.39035e+07	3.3276e+07	4.84393e+08	981739	4.83414e+08	3.39035e+07	4.49562e+08	882280	4.48681e+08	3.50312e+08	9.82976e+07	3.3276e+07	3.16997e+08	3.47754e+06	3.64152e+06	9.09987e+07	1.72141e+07	7.37672e+07	2.69227e+07	6.34245e+06	2.68952e+07	27606.9	1.25917e+07	2.1323e+07	6.90625e+07	171820	125058	46765.4	100976	47860.2	53130.6	5.17354e+06	2.73775e+06	2.42523e+06	6.26324e+06	3.8337e+06	2.4279e+06
Upper quartile	UN Region	Americas	1.02486e+09	0.204086	4.686e+08	4.3469e+08	3.52999e+08	7.53289e+07	4.02389e+06	4.27707e+06	8.28645e+07	3.19712e+08	3.42288e+07	3.35917e+07	4.87735e+08	986936	4.86751e+08	3.42288e+07	4.52831e+08	890255	4.51947e+08	3.52999e+08	1.0016e+08	3.35917e+07	3.19712e+08	4.02389e+06	4.27707e+06	9.25978e+07	1.76315e+07	7.53289e+07	2.72552e+07	6.56228e+06	2.7227e+07	28592.7	1.27591e+07	2.15354e+07	6.94839e+07	172737	125720	47014.4	102143	48395.2	53759.4	5.32789e+06	2.83948e+06	2.51931e+06	6.41115e+06	3.9273e+06	2.49016e+06
Max	UN Region	Americas	1.02486e+09	0.204086	4.81953e+08	4.47912e+08	3.65385e+08	8.31782e+07	7.95759e+06	8.03755e+06	9.30435e+07	3.31903e+08	3.55163e+07	3.49715e+07	5.01673e+08	1.0149e+06	5.00676e+08	3.55163e+07	4.6664e+08	928449	4.65739e+08	3.65385e+08	1.10015e+08	3.49715e+07	3.31903e+08	7.95759e+06	8.03755e+06	9.93755e+07	2.04797e+07	8.31782e+07	2.86773e+07	7.60652e+06	2.86476e+07	33476.1	1.34929e+07	2.25648e+07	7.12746e+07	177566	129257	48308.5	107581	50947.9	57071.2	6.26672e+06	3.48695e+06	3.05874e+06	7.08365e+06	4.35414e+06	2.84452e+06
Mean	UN Region	Asia	4.6357e+09	0.181728	1.04158e+09	8.65794e+08	6.73594e+08	2.00613e+07	1.5563e+07	1.56576e+08	1.922e+08	2.94906e+08	1.75787e+08	3.78688e+08	1.16867e+09	5.52034e+06	1.16315e+09	1.75787e+08	9.87359e+08	5.46785e+06	9.81891e+08	6.73594e+08	3.08297e+08	3.78688e+08	2.94906e+08	1.5563e+07	1.56576e+08	1.36158e+08	1.16097e+08	2.00613e+07	3.06369e+08	7.23189e+07	3.06055e+08	314527	9.13686e+07	8.44181e+07	5.65463e+08	966101	703162	262940	610131	261819	348312	3.52326e+07	1.86696e+07	1.6563e+07	1.70431e+06	1.03854e+06	665765
Min	UN Region	Asia	4.6357e+09	0.181728	1.01938e+09	8.4358e+08	6.57811e+08	1.67297e+07	1.2678e+07	1.44574e+08	1.78147e+08	2.82824e+08	1.68193e+08	3.66493e+08	1.14517e+09	5.37985e+06	1.13971e+09	1.68193e+08	9.6396e+08	5.24908e+06	9.58592e+08	6.57811e+08	2.94273e+08	3.66493e+08	2.82824e+08	1.2678e+07	1.44574e+08	1.28414e+08	1.09539e+08	1.67297e+07	2.96224e+08	6.51233e+07	2.95918e+08	289403	8.57629e+07	7.87266e+07	5.51848e+08	942419	685793	256626	583602	249470	332391	3.28289e+07	1.72477e+07	1.52106e+07	1.37248e+06	833517	516829
Lower quartile	UN Region	Asia	4.6357e+09	0.181728	1.03695e+09	8.61351e+08	6.70325e+08	1.921e+07	1.48659e+07	1.53996e+08	1.89319e+08	2.92448e+08	1.74312e+08	3.76576e+08	1.16378e+09	5.49581e+06	1.15827e+09	1.74312e+08	9.82618e+08	5.42878e+06	9.77161e+08	6.70325e+08	3.05168e+08	3.76576e+08	2.92448e+08	1.48659e+07	1.53996e+08	1.34529e+08	1.14723e+08	1.921e+07	3.04409e+08	7.11573e+07	3.04097e+08	309492	9.0256e+07	8.34374e+07	5.63169e+08	961707	699994	261728	604453	259329	344958	3.47424e+07	1.83429e+07	1.62594e+07	1.62452e+06	985605	630987
Median	UN Region	Asia	4.6357e+09	0.181728	1.04149e+09	8.65738e+08	6.73468e+08	1.99925e+07	1.54856e+07	1.56581e+08	1.92196e+08	2.94875e+08	1.75764e+08	3.78676e+08	1.16864e+09	5.51915e+06	1.16313e+09	1.75764e+08	9.87243e+08	5.46758e+06	9.81783e+08	6.73468e+08	3.08245e+08	3.78676e+08	2.94875e+08	1.54856e+07	1.56581e+08	1.36107e+08	1.16054e+08	1.99925e+07	3.06307e+08	7.23063e+07	3.05997e+08	314353	9.13527e+07	8.44143e+07	5.65424e+08	965940	703035	262897	610013	261726	348243	3.52161e+07	1.86528e+07	1.65478e+07	1.69926e+06	1.03429e+06	662757
Upper quartile	UN Region	Asia	4.6357e+09	0.181728	1.04617e+09	8.70293e+08	6.76815e+08	2.08396e+07	1.61722e+07	1.59079e+08	1.94999e+08	2.97305e+08	1.77233e+08	3.80689e+08	1.17358e+09	5.54436e+06	1.16803e+09	1.77233e+08	9.91997e+08	5.50571e+06	9.86519e+08	6.76815e+08	3.11433e+08	3.80689e+08	2.97305e+08	1.61722e+07	1.59079e+08	1.37696e+08	1.17452e+08	2.08396e+07	3.08308e+08	7.34334e+07	3.07994e+08	319499	9.24299e+07	8.54087e+07	5.67705e+08	970375	706267	264123	615617	264268	351517	3.56944e+07	1.89709e+07	1.68391e+07	1.77725e+06	1.08687e+06	697648
Max	UN Region	Asia	4.6357e+09	0.181728	1.06643e+09	8.91946e+08	6.91062e+08	2.49285e+07	2.0719e+07	1.6893e+08	2.0788e+08	3.07442e+08	1.83909e+08	3.92058e+08	1.19466e+09	5.67429e+06	1.18904e+09	1.83909e+08	1.01216e+09	5.6837e+06	1.0066e+09	6.91062e+08	3.27599e+08	3.92058e+08	3.07442e+08	2.0719e+07	1.6893e+08	1.45699e+08	1.24271e+08	2.49285e+07	3.17412e+08	7.79681e+07	3.17094e+08	343397	9.78457e+07	8.99202e+07	5.79148e+08	991971	722045	269926	644101	278708	365449	3.85637e+07	2.09121e+07	1.88951e+07	2.19352e+06	1.37555e+06	880339
Mean	UN Region	Europe	7.43843e+08	0.273988	3.34801e+08	3.2303e+08	2.20518e+08	5.2062e+07	7.5419e+06	4.29076e+07	1.02511e+08	1.598e+08	1.17714e+07	6.07183e+07	3.42433e+08	557433	3.41876e+08	1.17714e+07	3.30105e+08	604740	3.295e+08	2.20518e+08	1.08981e+08	6.07183e+07	1.598e+08	7.5419e+06	4.29076e+07	5.8532e+07	6.46996e+06	5.2062e+07	4.91111e+07	1.16073e+07	4.90608e+07	50340.3	4.08e+06	7.69144e+06	7.3652e+07	97552.8	71002.6	26550.2	65900.1	32912.8	32987.3	1.90917e+06	1.01084e+06	898328	4.42541e+06	2.72559e+06	1.69981e+06
Min	UN Region	Europe	7.43843e+08	0.273988	3.26585e+08	3.1488e+08	2.11629e+08	4.8197e+07	6.19466e+06	3.75737e+07	9.59313e+07	1.5079e+08	1.12554e+07	5.84793e+07	3.34172e+08	542310	3.33621e+08	1.12554e+07	3.21916e+08	575667	3.21311e+08	2.11629e+08	1.0238e+08	5.84793e+07	1.5079e+08	6.19466e+06	3.75737e+07	5.45779e+07	5.53167e+06	4.8197e+07	4.54775e+07	9.3504e+06	4.54334e+07	40765.2	3.82333e+06	7.29928e+06	7.12258e+07	94782.6	69007.5	25771.7	61910.5	30968.4	30794.5	1.57609e+06	800952	719757	4.04539e+06	2.48272e+06	1.55552e+06
Lower quartile	UN Region	Europe	7.43843e+08	0.273988	3.33386e+08	3.21634e+08	2.18984e+08	5.13126e+07	7.26894e+06	4.19158e+07	1.01217e+08	1.58354e+08	1.16642e+07	6.02705e+07	3.41008e+08	554315	3.40452e+08	1.16642e+07	3.28694e+08	598152	3.28093e+08	2.18984e+08	1.07659e+08	6.02705e+07	1.58354e+08	7.26894e+06	4.19158e+07	5.77447e+07	6.21456e+06	5.13126e+07	4.84487e+07	1.09736e+07	4.83992e+07	47485.3	4.02742e+06	7.61687e+06	7.31804e+07	96974.4	70587.6	26394.7	65037	32491.7	32527.9	1.81951e+06	952259	843178	4.3553e+06	2.68091e+06	1.6707e+06
Median	UN Region	Europe	7.43843e+08	0.273988	3.34838e+08	3.23062e+08	2.20564e+08	5.20302e+07	7.52928e+06	4.28835e+07	1.02483e+08	1.59832e+08	1.17673e+07	6.07115e+07	3.42421e+08	557419	3.41862e+08	1.17673e+07	3.30093e+08	604528	3.29488e+08	2.20564e+08	1.08945e+08	6.07115e+07	1.59832e+08	7.52928e+06	4.28835e+07	5.85153e+07	6.43126e+06	5.20302e+07	4.91656e+07	1.15172e+07	4.9114e+07	49781.8	4.07741e+06	7.68921e+06	7.36445e+07	97540.5	70994.5	26547.2	65866.2	32905.8	32960.2	1.89287e+06	997598	886243	4.42416e+06	2.72466e+06	1.69886e+06
Upper quartile	UN Region	Europe	7.43843e+08	0.273988	3.36229e+08	3.24447e+08	2.22077e+08	5.28051e+07	7.8061e+06	4.3873e+07	1.03749e+08	1.61284e+08	1.18787e+07	6.11577e+07	3.4389e+08	560528	3.43329e+08	1.18787e+07	3.31539e+08	611034	3.3093e+08	2.22077e+08	1.10257e+08	6.11577e+07	1.61284e+08	7.8061e+06	4.3873e+07	5.93042e+07	6.68713e+06	5.28051e+07	4.9818e+07	1.21645e+07	4.97672e+07	52727.9	4.13175e+06	7.7651e+06	7.4125e+07	98108.7	71409.7	26703.5	66723.9	33311.9	33436.9	1.98435e+06	1.05353e+06	938121	4.49209e+06	2.76791e+06	1.72821e+06
Max	UN Region	Europe	7.43843e+08	0.273988	3.42449e+08	3.30647e+08	2.28408e+08	5.61425e+07	9.01836e+06	4.82781e+07	1.10624e+08	1.67918e+08	1.23782e+07	6.30738e+07	3.49856e+08	579346	3.49295e+08	1.23782e+07	3.37493e+08	647150	3.36895e+08	2.28408e+08	1.16769e+08	6.30738e+07	1.67918e+08	9.01836e+06	4.82781e+07	6.25477e+07	8.09755e+06	5.61425e+07	5.2232e+07	1.53052e+07	5.21694e+07	68100.6	4.39381e+06	8.19682e+06	7.62565e+07	101843	74118.5	27725	70756.5	35319.9	35720.1	2.53072e+06	1.4752e+06	1.32033e+06	4.87179e+06	2.98997e+06	1.88181e+06
Mean	UN Region	NA	2.57939e+07	0.306549	1.23296e+07	1.22509e+07	8.71851e+06	2.19162e+06	1206.35	1.3396e+06	3.53243e+06	8.27748e+06	78623.6	441029	1.23997e+07	7592.92	1.23921e+07	78623.6	1.23135e+07	8008.15	1.23054e+07	8.71851e+06	3.58693e+06	441029	8.27748e+06	1206.35	1.3396e+06	2.24612e+06	54501	2.19162e+06	356916	84113.5	356549	366.931	24686.9	53936.8	535254	1328.63	967.034	361.594	1005.94	556.326	449.61	12916.7	6828.9	6087.76	186418	114880	71537.5
Min	UN Region	NA	2.57939e+07	0.306549	8.93678e+06	8.86736e+06	4.63145e+06	558843	0	0	918294	4.23669e+06	55004.5	328534	9.00506e+06	5506.42	8.99956e+06	55004.5	8.93014e+06	5418.9	8.924e+06	4.63145e+06	970567	328534	4.23669e+06	0	0	611724	33670.7	558843	249230	38156.5	248926	155.934	14961.8	37512.5	397655	965.882	699.976	263.211	639.464	330.659	277.731	6015.6	2808.35	2312.87	43952.5	26870.1	17082.3
Lower quartile	UN Region	NA	2.57939e+07	0.306549	1.15385e+07	1.14592e+07	7.81109e+06	1.77633e+06	0	607472	2.74781e+06	7.37362e+06	73780.7	414752	1.16105e+07	7073.72	1.16032e+07	73780.7	1.15222e+07	7318.52	1.15144e+07	7.81109e+06	2.80209e+06	414752	7.37362e+06	0	607472	1.83117e+06	48921.8	1.77633e+06	332786	72364.3	332462	312.978	22676.7	50287.8	504528	1235.89	899.116	336.442	904.286	494.616	405.532	10938.1	5533.98	4851.51	149890	91919.4	56358.4
Median	UN Region	NA	2.57939e+07	0.306549	1.227e+07	1.21948e+07	8.6986e+06	2.16068e+06	0	1.181e+06	3.39511e+06	8.25168e+06	78268.9	440276	1.23406e+07	7539.36	1.23333e+07	78268.9	1.22551e+07	7924.89	1.22474e+07	8.6986e+06	3.45035e+06	440276	8.25168e+06	0	1.181e+06	2.21225e+06	53911.6	2.16068e+06	355515	82274.5	355117	358.704	24524	53633.4	534319	1317.51	959.174	358.448	991.86	545.482	443.844	12576.9	6569.14	5828.93	182979	112260	69486.8
Upper quartile	UN Region	NA	2.57939e+07	0.306549	1.30846e+07	1.30074e+07	9.5947e+06	2.56795e+06	319.087	1.87316e+06	4.20396e+06	9.14661e+06	83138.1	466825	1.31554e+07	8051.74	1.3148e+07	83138.1	1.30734e+07	8632.45	1.30646e+07	9.5947e+06	4.26158e+06	466825	9.14661e+06	319.087	1.87316e+06	2.61999e+06	59358.9	2.56795e+06	380595	94479	380206	412.713	26564.7	57265.8	565097	1409.59	1026.22	383.052	1093.23	609.373	487.85	14544	7859.62	7065.32	218778	134369	84170.9
Max	UN Region	NA	2.57939e+07	0.306549	1.66832e+07	1.66089e+07	1.34197e+07	4.81906e+06	39548.8	5.59731e+06	8.30875e+06	1.30007e+07	104254	586189	1.67635e+07	10588.7	1.67537e+07	104254	1.66794e+07	11987.7	1.66689e+07	1.34197e+07	8.37306e+06	586189	1.30007e+07	39548.8	5.59731e+06	4.87343e+06	87962.5	4.81906e+06	478447	151765	477930	771.757	36953.1	76650.8	710268	1873.46	1358.79	514.665	1585.78	960.426	739.411	27488.1	19258.8	15497	405350	248013	187977
Mean	UN Region	Oceania	4.37954e+07	0.207348	1.96146e+07	1.83947e+07	1.35776e+07	4.30772e+06	509388	0	4.81711e+06	1.26979e+07	1.21988e+06	879677	1.98627e+07	42673.2	1.98201e+07	1.21988e+06	1.86002e+07	23583.1	1.85766e+07	1.35776e+07	4.99902e+06	879677	1.26979e+07	509388	0	4.48963e+06	181912	4.30772e+06	711120	168557	710389	731.052	653543	566340	2.16582e+06	7467.62	5434.87	2032.75	2577.01	1267.96	1309.04	51097.2	27055.2	24042.1	365973	225726	140247
Min	UN Region	Oceania	4.37954e+07	0.207348	1.76449e+07	1.63897e+07	1.19315e+07	3.61178e+06	255112	0	4.02363e+06	1.10672e+07	1.04196e+06	713265	1.78569e+07	37946	1.78148e+07	1.04196e+06	1.65597e+07	19793.7	1.65385e+07	1.19315e+07	4.24029e+06	713265	1.10672e+07	255112	0	3.81372e+06	127224	3.61178e+06	569076	102650	568447	494.217	496517	402988	1.90678e+06	6599.76	4801.17	1792.71	2032	985.418	1018.54	34004.9	16345.8	14314.2	304153	186791	111881
Lower quartile	UN Region	Oceania	4.37954e+07	0.207348	1.92018e+07	1.79875e+07	1.31972e+07	4.16489e+06	448674	0	4.65357e+06	1.23166e+07	1.18081e+06	846117	1.94555e+07	41651.3	1.94132e+07	1.18081e+06	1.81933e+07	22752.4	1.81691e+07	1.31972e+07	4.83689e+06	846117	1.23166e+07	448674	0	4.34609e+06	169364	4.16489e+06	681845	155266	681090	672.176	621348	536358	2.11387e+06	7286.34	5302.92	1983.21	2455.24	1210.18	1238.58	46408.1	24017.9	21243.5	352593	217323	134510
Median	UN Region	Oceania	4.37954e+07	0.207348	1.9616e+07	1.84001e+07	1.35766e+07	4.30757e+06	503531	0	4.817e+06	1.26988e+07	1.21825e+06	879044	1.98648e+07	42646	1.98212e+07	1.21825e+06	1.86032e+07	23539.9	1.858e+07	1.35766e+07	4.99788e+06	879044	1.26988e+07	503531	0	4.48821e+06	181123	4.30757e+06	710463	167634	709823	726.306	651299	565073	2.16562e+06	7464.78	5431.31	2032.27	2565.58	1262.19	1301.57	50553.9	26650.3	23689.3	365886	225464	140112
Upper quartile	UN Region	Oceania	4.37954e+07	0.207348	2.00148e+07	1.87908e+07	1.39547e+07	4.44941e+06	564607	0	4.97432e+06	1.30778e+07	1.25849e+06	912293	2.02649e+07	43671.4	2.02228e+07	1.25849e+06	1.89975e+07	24350.1	1.89734e+07	1.39547e+07	5.15769e+06	912293	1.30778e+07	564607	0	4.63098e+06	193518	4.44941e+06	739305	180860	738519	784.551	683737	594666	2.21675e+06	7643.3	5562.54	2080.83	2687.17	1321.69	1373.07	55219.3	29579.6	26354.6	378700	233846	145529
Max	UN Region	Oceania	4.37954e+07	0.207348	2.17474e+07	2.04608e+07	1.55057e+07	5.0631e+06	979514	0	5.67791e+06	1.46245e+07	1.49956e+06	1.06603e+06	2.19716e+07	49029.6	2.1926e+07	1.49956e+06	2.06394e+07	28483.9	2.06141e+07	1.55057e+07	5.88193e+06	1.06603e+06	1.46245e+07	979514	0	5.23263e+06	253907	5.0631e+06	859818	239540	859038	1116.82	884801	735455	2.53661e+06	8546.9	6224.46	2322.44	3363.07	1634.51	1781.18	79928.3	50298.8	41880	438427	279553	170447
Mean	UN Subregion	Australia and New Zealand	3.06784e+07	0.475391	1.66925e+07	1.6692e+07	1.19252e+07	4.25754e+06	509282	0	4.76682e+06	1.19251e+07	563.541	20.3301	1.67257e+07	10596.8	1.67151e+07	563.541	1.67145e+07	8352.11	1.67062e+07	1.19252e+07	4.78104e+06	20.3301	1.19251e+07	509282	0	4.27176e+06	14217.5	4.25754e+06	16.4464	3.88377	16.4296	0.0167421	100.472	463.069	19532.8	1854.67	1349.89	504.775	880.859	543.291	337.568	326.59	173.175	153.415	361731	223114	138617
Min	UN Subregion	Australia and New Zealand	3.06784e+07	0.475391	1.49529e+07	1.49528e+07	1.03802e+07	3.58292e+06	255062	0	3.99471e+06	1.03802e+07	24.0376	0.0922301	1.49846e+07	9111.02	1.49751e+07	24.0376	1.49749e+07	6927.34	1.4967e+07	1.03802e+07	4.00921e+06	0.0922301	1.03802e+07	255062	0	3.59742e+06	12072.9	3.58292e+06	0.0730303	0.0191998	0.0729684	6.18164e-05	3.66942	20.3682	16883.7	1604.04	1168.06	435.975	720.106	440.355	271.521	246.739	124.02	109.139	301888	185978	111094
Lower quartile	UN Subregion	Australia and New Zealand	3.06784e+07	0.475391	1.62841e+07	1.62834e+07	1.15497e+07	4.11809e+06	448512	0	4.60478e+06	1.15497e+07	353.889	7.98713	1.63174e+07	10277.7	1.6307e+07	353.889	1.63063e+07	8051.71	1.62979e+07	1.15497e+07	4.61913e+06	7.98713	1.15497e+07	448512	0	4.1321e+06	13748.5	4.11809e+06	6.33794	1.07826	6.32802	0.00452876	55.5639	288.161	18933.8	1798.3	1308.86	489.38	843.394	519.587	322.106	311.125	161.636	142.649	348661	214800	132942
Median	UN Subregion	Australia and New Zealand	3.06784e+07	0.475391	1.66999e+07	1.66991e+07	1.19263e+07	4.257e+06	503251	0	4.76463e+06	1.19262e+07	502.851	15.4482	1.67326e+07	10577.6	1.6722e+07	502.851	1.67216e+07	8337.7	1.6713e+07	1.19263e+07	4.77923e+06	15.4482	1.19262e+07	503251	0	4.27135e+06	14221.8	4.257e+06	12.3364	2.32981	12.327	0.0101135	84.8418	414.452	19492.5	1850.75	1346.83	503.711	878.646	541.622	336.53	325.799	172.064	152.557	361492	222913	138475
Upper quartile	UN Subregion	Australia and New Zealand	3.06784e+07	0.475391	1.70863e+07	1.70857e+07	1.22932e+07	4.39403e+06	564518	0	4.92131e+06	1.22932e+07	735.215	27.4817	1.71192e+07	10889.7	1.71082e+07	735.215	1.71076e+07	8625.95	1.7099e+07	1.22932e+07	4.93545e+06	27.4817	1.22932e+07	564518	0	4.40851e+06	14679.4	4.39403e+06	22.0584	4.86131	22.0148	0.0211085	129.531	598.983	20110.2	1907.51	1388.18	519.146	914.569	564.571	351.42	341.413	183.465	162.832	374187	230942	143849
Max	UN Subregion	Australia and New Zealand	3.06784e+07	0.475391	1.86482e+07	1.86476e+07	1.37736e+07	5.01565e+06	979463	0	5.59241e+06	1.37736e+07	1965.7	142.879	1.86818e+07	12522.8	1.86705e+07	1965.7	1.86699e+07	10126.8	1.86614e+07	1.37736e+07	5.60635e+06	142.879	1.37736e+07	979463	0	5.03029e+06	16459.5	5.01565e+06	118.384	46.9314	118.327	0.233179	503.588	1602.82	22882.6	2183.64	1592.6	593.507	1108.62	686.798	430.382	403.858	236.047	220.304	435637	272754	169044
Mean	UN Subregion	Central Asia	7.47146e+07	0.280626	2.08379e+07	1.54484e+07	1.52292e+07	195837	23326.5	0	219163	818829	5.38949e+06	1.44104e+07	2.30252e+07	140174	2.2885e+07	5.38949e+06	1.74955e+07	146968	1.73485e+07	1.52292e+07	2.11929e+06	1.44104e+07	818829	23326.5	0	2.09596e+06	1.90012e+06	195837	1.16586e+07	2.75177e+06	1.16467e+07	11977.3	2.71319e+06	2.6763e+06	2.0087e+07	24530.9	17854.2	6676.69	16576.3	7054.76	9521.56	577052	306080	270972	16659	7395.22	9263.83
Min	UN Subregion	Central Asia	7.47146e+07	0.280626	1.89498e+07	1.39655e+07	1.37593e+07	127802	19022.7	0	146952	815602	4.31e+06	1.29404e+07	2.10005e+07	124922	2.08716e+07	4.31e+06	1.59115e+07	121265	1.57787e+07	1.37593e+07	1.73059e+06	1.29404e+07	815602	19022.7	0	1.71105e+06	1.53598e+06	127802	1.02364e+07	2.12913e+06	1.02254e+07	8995.03	2.04473e+06	2.09997e+06	1.82133e+07	21804.1	15835	5930.35	13228	5559.74	7361.91	450119	225407	190962	8993.6	4059.03	4934.56
Lower quartile	UN Subregion	Central Asia	7.47146e+07	0.280626	2.04302e+07	1.50907e+07	1.48754e+07	177993	19051.9	0	200631	819153	5.15769e+06	1.40566e+07	2.26047e+07	136567	2.24668e+07	5.15769e+06	1.71304e+07	141453	1.69857e+07	1.48754e+07	2.03344e+06	1.40566e+07	819153	19051.9	0	2.01054e+06	1.81692e+06	177993	1.13443e+07	2.60695e+06	1.13322e+07	11316.8	2.55647e+06	2.5282e+06	1.96744e+07	23884	17389.4	6499.19	15825.3	6719.71	9064.35	547089	286188	252727	14881	6571.75	8271.74
Median	UN Subregion	Central Asia	7.47146e+07	0.280626	2.08176e+07	1.54336e+07	1.52119e+07	194400	19597.8	0	217613	819190	5.37888e+06	1.43927e+07	2.30005e+07	139959	2.2863e+07	5.37888e+06	1.74805e+07	146743	1.73351e+07	1.52119e+07	2.1145e+06	1.43927e+07	819190	19597.8	0	2.09163e+06	1.89549e+06	194400	1.16493e+07	2.73801e+06	1.16365e+07	11945.1	2.69657e+06	2.66423e+06	2.00632e+07	24492	17829.3	6663.43	16506.3	7027.86	9480.89	575130	304252	269282	16525.3	7332.33	9183
Upper quartile	UN Subregion	Central Asia	7.47146e+07	0.280626	2.12385e+07	1.57886e+07	1.55684e+07	212240	23954.5	0	235789	819190	5.60316e+06	1.47502e+07	2.34445e+07	143629	2.33011e+07	5.60316e+06	1.7855e+07	152189	1.77044e+07	1.55684e+07	2.19788e+06	1.47502e+07	819190	23954.5	0	2.17436e+06	1.97627e+06	212240	1.19587e+07	2.89008e+06	1.19469e+07	12610.7	2.85789e+06	2.80907e+06	2.0489e+07	25142.5	18307.3	6847.13	17258.8	7360.15	9934.46	604100	323987	287553	18270.6	8144.87	10160.8
Max	UN Subregion	Central Asia	7.47146e+07	0.280626	2.29838e+07	1.73524e+07	1.71624e+07	307833	59578.4	0	326856	819190	6.84906e+06	1.63444e+07	2.54387e+07	159592	2.52865e+07	6.84906e+06	1.96551e+07	174135	1.94982e+07	1.71624e+07	2.6107e+06	1.63444e+07	819190	59578.4	0	2.58652e+06	2.38656e+06	307833	1.33915e+07	3.49712e+06	1.33773e+07	15492.1	3.7082e+06	3.61252e+06	2.22849e+07	28158.5	20541.2	7657.23	20880.5	9207.74	12119.9	790462	454809	414610	28115.5	11954.7	16160.7
Mean	UN Subregion	Eastern Asia	1.63733e+09	0.16017	3.80842e+08	3.57976e+08	1.81711e+08	1.57381e+07	5.50386e+06	1.55022e+08	1.76264e+08	1.76803e+08	2.28666e+07	4.90853e+06	4.2661e+08	1.16965e+06	4.25441e+08	2.28666e+07	4.02574e+08	1.4969e+06	4.01077e+08	1.81711e+08	2.19366e+08	4.90853e+06	1.76803e+08	5.50386e+06	1.55022e+08	5.88395e+07	4.31014e+07	1.57381e+07	3.9737e+06	934826	3.96962e+06	4082.21	8.41776e+06	1.44488e+07	3.04417e+07	204712	148997	55714.4	180896	80683.4	100213	1.30668e+07	6.92571e+06	6.14105e+06	1.33656e+06	824854	511707
Min	UN Subregion	Eastern Asia	1.63733e+09	0.16017	3.63386e+08	3.40507e+08	1.69776e+08	1.2878e+07	3.70567e+06	1.43103e+08	1.63643e+08	1.65702e+08	2.17054e+07	3.88881e+06	4.07726e+08	1.12418e+06	4.06592e+08	2.17054e+07	3.83714e+08	1.40087e+06	3.82276e+08	1.69776e+08	2.07064e+08	3.88881e+06	1.65702e+08	3.70567e+06	1.43103e+08	5.33413e+07	3.89032e+07	1.2878e+07	3.10137e+06	643641	3.09849e+06	2817.41	7.79955e+06	1.38089e+07	2.88281e+07	197295	143586	53709.2	167064	74185.4	92237.8	1.16072e+07	5.9985e+06	5.27265e+06	1.06533e+06	657395	391464
Lower quartile	UN Subregion	Eastern Asia	1.63733e+09	0.16017	3.76971e+08	3.54193e+08	1.79541e+08	1.49896e+07	4.92746e+06	1.52437e+08	1.73412e+08	1.74645e+08	2.26129e+07	4.63426e+06	4.22555e+08	1.16075e+06	4.21397e+08	2.26129e+07	3.98631e+08	1.47574e+06	3.9714e+08	1.79541e+08	2.16421e+08	4.63426e+06	1.74645e+08	4.92746e+06	1.52437e+08	5.76243e+07	4.20981e+07	1.49896e+07	3.74039e+06	838114	3.73623e+06	3665.42	8.26319e+06	1.42993e+07	3.01098e+07	203101	147819	55267.4	177598	79213	98333.6	1.27011e+07	6.69138e+06	5.91996e+06	1.26732e+06	778953	481395
Median	UN Subregion	Eastern Asia	1.63733e+09	0.16017	3.80722e+08	3.57807e+08	1.81633e+08	1.56528e+07	5.3622e+06	1.55011e+08	1.76306e+08	1.76741e+08	2.28396e+07	4.89359e+06	4.26443e+08	1.16915e+06	4.25275e+08	2.28396e+07	4.02434e+08	1.49605e+06	4.00947e+08	1.81633e+08	2.19347e+08	4.89359e+06	1.76741e+08	5.3622e+06	1.55011e+08	5.87583e+07	4.30077e+07	1.56528e+07	3.94871e+06	915258	3.94447e+06	3988.08	8.40096e+06	1.4441e+07	3.04213e+07	204615	148934	55688	180711	80584.7	100120	1.30268e+07	6.89074e+06	6.1144e+06	1.32901e+06	819927	508344
Upper quartile	UN Subregion	Eastern Asia	1.63733e+09	0.16017	3.84684e+08	3.61747e+08	1.83794e+08	1.64209e+07	5.96943e+06	1.57542e+08	1.79046e+08	1.78901e+08	2.30941e+07	5.15565e+06	4.30566e+08	1.17812e+06	4.29383e+08	2.30941e+07	4.06452e+08	1.51672e+06	4.04952e+08	1.83794e+08	2.22289e+08	5.15565e+06	1.78901e+08	5.96943e+06	1.57542e+08	5.9997e+07	4.40196e+07	1.64209e+07	4.1854e+06	1.01051e+06	4.1809e+06	4399.33	8.54623e+06	1.45848e+07	3.07653e+07	206209	150088	56138.2	183934	82030	101909	1.33869e+07	7.12624e+06	6.32574e+06	1.40011e+06	865722	539836
Max	UN Subregion	Eastern Asia	1.63733e+09	0.16017	3.99598e+08	3.75543e+08	1.93846e+08	1.98973e+07	8.97828e+06	1.67327e+08	1.89937e+08	1.87869e+08	2.44509e+07	6.47512e+06	4.46339e+08	1.21948e+06	4.45131e+08	2.44509e+07	4.21757e+08	1.60973e+06	4.20237e+08	1.93846e+08	2.35065e+08	6.47512e+06	1.87869e+08	8.97828e+06	1.67327e+08	6.59382e+07	4.93506e+07	1.98973e+07	5.38067e+06	1.5788e+06	5.37452e+06	7143.01	9.44098e+06	1.55395e+07	3.24309e+07	214528	156121	58406.8	201935	91030.7	111918	1.51088e+07	8.5217e+06	7.93152e+06	1.78187e+06	1.14053e+06	724981
Mean	UN Subregion	Eastern Europe	2.92537e+08	0.358258	1.11126e+08	1.00699e+08	9.50745e+07	4.58521e+06	6.34189	1.03938e+06	5.62459e+06	3.69298e+07	1.04268e+07	5.81447e+07	1.17824e+08	365882	1.17458e+08	1.04268e+07	1.07031e+08	423638	1.06607e+08	9.50745e+07	1.1533e+07	5.81447e+07	3.69298e+07	6.34189	1.03938e+06	1.04936e+07	5.90839e+06	4.58521e+06	4.70281e+07	1.11165e+07	4.69799e+07	48200.9	3.66103e+06	6.76577e+06	6.9361e+07	64030.3	46603.3	17427	44048.4	19964.3	24084.1	1.7897e+06	947773	841922	389734	235777	153956
Min	UN Subregion	Eastern Europe	2.92537e+08	0.358258	1.08171e+08	9.7936e+07	9.21619e+07	3.85189e+06	0	894477	4.85392e+06	3.51506e+07	9.91973e+06	5.59853e+07	1.14687e+08	352356	1.14324e+08	9.91973e+06	1.03966e+08	394908	1.03535e+08	9.21619e+07	1.01626e+07	5.59853e+07	3.51506e+07	0	894477	9.2374e+06	5.01765e+06	3.85189e+06	4.33815e+07	8.9336e+06	4.33391e+07	39104.4	3.37207e+06	6.40019e+06	6.69331e+07	61802.5	44948.3	16810.7	40580.4	18431.7	22148.7	1.46989e+06	745031	671060	326687	198356	128332
Lower quartile	UN Subregion	Eastern Europe	2.92537e+08	0.358258	1.10551e+08	1.00145e+08	9.45211e+07	4.43427e+06	0	937378	5.45229e+06	3.65748e+07	1.03226e+07	5.77002e+07	1.17192e+08	363232	1.16827e+08	1.03226e+07	1.06416e+08	417565	1.05995e+08	9.45211e+07	1.12314e+07	5.77002e+07	3.65748e+07	0	937378	1.02064e+07	5.65154e+06	4.43427e+06	4.63864e+07	1.04849e+07	4.63351e+07	45424.7	3.61055e+06	6.69317e+06	6.88956e+07	63555.2	46254.1	17295	43301.6	19624	23653.7	1.69916e+06	890537	787556	376410	227410	148541
Median	UN Subregion	Eastern Europe	2.92537e+08	0.358258	1.11127e+08	1.00696e+08	9.50633e+07	4.57617e+06	0	991831	5.6178e+06	3.693e+07	1.0422e+07	5.8136e+07	1.17833e+08	365804	1.17466e+08	1.0422e+07	1.07045e+08	423361	1.06624e+08	9.50633e+07	1.15101e+07	5.8136e+07	3.693e+07	0	991831	1.04675e+07	5.86862e+06	4.57617e+06	4.70803e+07	1.10234e+07	4.70327e+07	47645.6	3.66031e+06	6.76324e+06	6.93572e+07	64015.2	46595.3	17421.8	43998.9	19949.2	24064	1.7743e+06	933709	830178	388822	235251	153593
Upper quartile	UN Subregion	Eastern Europe	2.92537e+08	0.358258	1.11705e+08	1.01251e+08	9.56338e+07	4.72881e+06	0	1.12819e+06	5.79226e+06	3.72742e+07	1.05279e+07	5.85883e+07	1.18441e+08	368521	1.18072e+08	1.05279e+07	1.07629e+08	429092	1.07199e+08	9.56338e+07	1.18098e+07	5.85883e+07	3.72742e+07	0	1.12819e+06	1.07551e+07	6.12075e+06	4.72881e+06	4.77303e+07	1.16666e+07	4.76799e+07	50488.6	3.70916e+06	6.83578e+06	6.98289e+07	64495.6	46941.8	17555.9	44768.1	20291	24508.2	1.86129e+06	990242	881737	402557	243597	159086
Max	UN Subregion	Eastern Europe	2.92537e+08	0.358258	1.14287e+08	1.03807e+08	9.81353e+07	5.37173e+06	386.11	1.54652e+06	6.52363e+06	3.89698e+07	1.10459e+07	6.05506e+07	1.22264e+08	383495	1.2189e+08	1.10459e+07	1.11252e+08	460403	1.10814e+08	9.81353e+07	1.32233e+07	6.05506e+07	3.89698e+07	386.11	1.54652e+06	1.21578e+07	7.52895e+06	5.37173e+06	5.0047e+07	1.4693e+07	4.9988e+07	65028.8	3.96994e+06	7.2386e+06	7.19769e+07	67513.2	49126.7	18386.5	48360.6	21876.2	26598.6	2.42709e+06	1.41153e+06	1.26699e+06	469633	283335	189757
Mean	UN Subregion	Latin America and the Caribbean	6.51326e+08	0.203582	2.22058e+08	1.88139e+08	1.83917e+08	3.36388e+06	857833	0	4.22171e+06	1.50631e+08	3.3919e+07	3.32855e+07	2.40663e+08	793855	2.39869e+08	3.3919e+07	2.0595e+08	721846	2.05229e+08	1.83917e+08	2.13118e+07	3.32855e+07	1.50631e+08	857833	0	2.04539e+07	1.70901e+07	3.36388e+06	2.69279e+07	6.35764e+06	2.69002e+07	27670.2	1.25913e+07	2.13276e+07	6.87202e+07	138926	101114	37811.9	83252.1	36913.1	46339	5.1862e+06	2.74945e+06	2.43674e+06	285896	146214	139682
Min	UN Subregion	Latin America and the Caribbean	6.51326e+08	0.203582	2.16174e+08	1.83064e+08	1.78708e+08	2.68776e+06	781074	0	3.54067e+06	1.45234e+08	3.23693e+07	3.16617e+07	2.34457e+08	770187	2.33677e+08	3.23693e+07	2.00567e+08	678540	1.99868e+08	1.78708e+08	1.91878e+07	3.16617e+07	1.45234e+08	781074	0	1.83588e+07	1.52092e+07	2.68776e+06	2.54061e+07	5.38292e+06	2.538e+07	23411.2	1.16583e+07	2.01963e+07	6.63096e+07	134937	98182.6	36734.8	78012.5	34492.4	43463.6	4.54198e+06	2.31513e+06	2.07435e+06	213065	105808	103215
Lower quartile	UN Subregion	Latin America and the Caribbean	6.51326e+08	0.203582	2.21113e+08	1.87245e+08	1.83038e+08	3.20062e+06	826090	0	4.05372e+06	1.49786e+08	3.3606e+07	3.29724e+07	2.39637e+08	789130	2.38845e+08	3.3606e+07	2.04973e+08	714115	2.04249e+08	1.83038e+08	2.08697e+07	3.29724e+07	1.49786e+08	826090	0	2.00103e+07	1.66803e+07	3.20062e+06	2.6596e+07	6.14614e+06	2.65691e+07	26683.7	1.24199e+07	2.1113e+07	6.83043e+07	138081	100499	37579.3	82114.4	36397.8	45706.2	5.03523e+06	2.64686e+06	2.34294e+06	270038	137557	131556
Median	UN Subregion	Latin America and the Caribbean	6.51326e+08	0.203582	2.22051e+08	1.88128e+08	1.83907e+08	3.34617e+06	843201	0	4.2062e+06	1.50637e+08	3.39025e+07	3.3276e+07	2.40614e+08	793730	2.39818e+08	3.39025e+07	2.05925e+08	721567	2.05203e+08	1.83907e+08	2.12765e+07	3.3276e+07	1.50637e+08	843201	0	2.04242e+07	1.70564e+07	3.34617e+06	2.69227e+07	6.34245e+06	2.68952e+07	27606.9	1.25907e+07	2.13225e+07	6.8712e+07	138906	101096	37807.5	83228.9	36895.2	46315.2	5.17e+06	2.73579e+06	2.42354e+06	284672	145397	139225
Upper quartile	UN Subregion	Latin America and the Caribbean	6.51326e+08	0.203582	2.23011e+08	1.89043e+08	1.848e+08	3.51027e+06	869089	0	4.36891e+06	1.51477e+08	3.42283e+07	3.35917e+07	2.41708e+08	798541	2.40913e+08	3.42283e+07	2.06945e+08	729062	2.06217e+08	1.848e+08	2.17286e+07	3.35917e+07	1.51477e+08	869089	0	2.08638e+07	1.74743e+07	3.51027e+06	2.72552e+07	6.56228e+06	2.7227e+07	28592.7	1.27585e+07	2.15353e+07	6.91346e+07	139734	101713	38031.7	84326.8	37397.4	46934.3	5.32435e+06	2.83763e+06	2.5176e+06	300961	154454	147194
Max	UN Subregion	Latin America and the Caribbean	6.51326e+08	0.203582	2.27266e+08	1.93024e+08	1.8892e+08	4.2153e+06	1.16271e+06	0	5.15709e+06	1.55599e+08	3.5516e+07	3.49715e+07	2.46653e+08	821626	2.45853e+08	3.5516e+07	2.11535e+08	765052	2.1079e+08	1.8892e+08	2.44953e+07	3.49715e+07	1.55599e+08	1.16271e+06	0	2.36703e+07	2.03308e+07	4.2153e+06	2.86773e+07	7.60652e+06	2.86476e+07	33476.1	1.34924e+07	2.25641e+07	7.09217e+07	143928	104702	39225.9	89489.8	39564.2	50137.3	6.26333e+06	3.485e+06	3.05716e+06	387034	192469	197932
Mean	UN Subregion	Melanesia	1.18931e+07	0.147822	2.40741e+06	1.24142e+06	1.22274e+06	18670.7	6.94387	0	18677.6	427490	1.16599e+06	795251	2.60727e+06	30044.9	2.57722e+06	1.16599e+06	1.41123e+06	13586.2	1.39765e+06	1.22274e+06	174905	795251	427490	6.94387	0	174898	156227	18670.7	643041	152209	642381	660.66	626420	539570	2.00487e+06	5257.49	3826.25	1431.24	1489.68	629.228	860.453	47348.3	25070.7	22277.6	1574.18	975.25	598.926
Min	UN Subregion	Melanesia	1.18931e+07	0.147822	2.09637e+06	978018	971014	0	0	0	0	261451	987431	638417	2.28615e+06	25862	2.25741e+06	987431	1.13906e+06	10128.2	1.12802e+06	971014	108346	638417	261451	0	0	108346	104334	0	516814	90502.7	516247	438.631	474023	368829	1.75279e+06	4488.97	3280.47	1208.51	1009.18	412.7	561.336	30857.3	13641.4	12971.2	0	0	0
Lower quartile	UN Subregion	Melanesia	1.18931e+07	0.147822	2.33896e+06	1.18485e+06	1.1692e+06	2496.37	0	0	2509.15	380917	1.12729e+06	762567	2.53721e+06	29065.8	2.50745e+06	1.12729e+06	1.35296e+06	12841.8	1.3397e+06	1.1692e+06	155201	762567	380917	0	0	155194	143840	2496.37	614441	139209	613852	605.256	594963	509670	1.95302e+06	5081.58	3698.13	1383.87	1374.98	575.749	790.356	42850.5	22013.3	19503.8	209.264	126.165	77.6402
Median	UN Subregion	Melanesia	1.18931e+07	0.147822	2.40634e+06	1.23955e+06	1.22108e+06	9814.1	0	0	9821.08	422951	1.16445e+06	793826	2.60792e+06	30011.9	2.57776e+06	1.16445e+06	1.41041e+06	13530.9	1.39669e+06	1.22108e+06	170482	793826	422951	0	0	170471	155457	9814.1	642340	151352	641678	656.371	623854	538147	2.00476e+06	5250.55	3821.98	1429.51	1479.89	624.529	853.878	46855.7	24645.3	21894.1	813.142	501.57	303.176
Upper quartile	UN Subregion	Melanesia	1.18931e+07	0.147822	2.47441e+06	1.2971e+06	1.2763e+06	28233	0	0	28233	472048	1.20453e+06	827059	2.67496e+06	30981	2.64479e+06	1.20453e+06	1.46867e+06	14314.1	1.45489e+06	1.2763e+06	190935	827059	472048	0	0	190917	167834	28233	670507	163902	669790	710.157	656781	568020	2.05501e+06	5421.03	3945.4	1476.32	1593.1	674.892	922.69	51368.4	27568.3	24530.9	2363.63	1453.74	870
Max	UN Subregion	Melanesia	1.18931e+07	0.147822	2.77773e+06	1.53045e+06	1.5101e+06	129256	103.118	0	129277	625312	1.4339e+06	977941	3.01432e+06	36032.1	2.98029e+06	1.4339e+06	1.69906e+06	17807.5	1.68239e+06	1.5101e+06	304019	977941	625312	103.118	0	304019	231250	129256	779378	230783	778571	1002.34	864804	707436	2.36165e+06	6370.16	4640.38	1729.78	2282.94	976.342	1309.97	75843.5	48218	39805	12372.2	8498.62	6009.47
Mean	UN Subregion	Micronesia	521059	0.201698	201619	173514	162197	11317.1	0	0	11317.1	144371	28104.8	17826.3	207258	820.883	206438	28104.8	178333	502.28	177830	162197	15633.5	17826.3	144371	0	0	15633.5	4316.44	11317.1	14422.6	3403.68	14407.9	14.7537	13793.2	14311.6	47254.3	143.69	104.567	39.1224	66.3667	32.4139	33.9529	1279.54	673.315	606.223	962.957	594.438	368.518
Min	UN Subregion	Micronesia	521059	0.201698	155264	129615	123521	1504.16	0	0	1504.16	107928	22750.9	14569.1	158675	639.143	158008	22750.9	132359	210.908	131932	123521	3799.08	14569.1	107928	0	0	3799.08	932.778	1504.16	7429.88	326.932	7423.32	1.88388	5069.7	5504.96	39114.9	108.548	79.2754	28.6296	26.5771	13.5257	13.0513	230.481	88.1112	59.9257	132.94	90.8412	42.0988
Lower quartile	UN Subregion	Micronesia	521059	0.201698	192068	164179	152915	7388.19	0	0	7388.19	135202	26012.1	16390.3	197629	764.608	196812	26012.1	169037	444.494	168496	152915	11626.2	16390.3	135202	0	0	11626.2	3095.94	7388.19	13009.9	2329.9	12996.6	10.0128	10776.2	11322	44050.3	133.346	96.98	36.2917	57.738	27.9952	28.9672	853.238	402.509	350.455	620.157	379.917	233.893
Median	UN Subregion	Micronesia	521059	0.201698	201548	173646	162023	10544.3	0	0	10544.3	144247	27432.9	17342.2	207152	809.983	206345	27432.9	178435	497.652	177917	162023	14921.1	17342.2	144247	0	0	14921.1	4029.39	10544.3	14250.6	3218.94	14236.4	13.8919	13765.2	14383.3	46266.8	141.855	103.196	38.5951	65.5926	31.8889	33.3489	1160.6	583.396	515.289	887.719	545.801	337.046
Upper quartile	UN Subregion	Micronesia	521059	0.201698	211343	183022	171287	14534.9	0	0	14534.9	153354	29541.3	18749.4	216965	863.979	216146	29541.3	187782	557.533	187256	171287	18971.1	18749.4	153354	0	0	18971.1	5264.54	14534.9	15624.7	4277.86	15607.7	18.4822	16552.2	17110.9	49522.9	151.644	110.488	41.3401	74.1416	36.1968	38.3516	1592.01	842.408	758.277	1238.6	761.461	472.709
Max	UN Subregion	Micronesia	521059	0.201698	250165	217351	211904	36516.7	0	0	36516.7	187476	46179.7	29463.7	260944	1280.85	259844	46179.7	228468	916.831	227688	211904	41082.8	29463.7	187476	0	0	41082.8	12501.7	36516.7	28300.5	9850.2	28265.2	50.3101	31004.3	28275	69034.6	227.771	167.975	64.2058	142.067	71.4381	73.0562	4475.1	3503.06	2820.87	3583.12	2401.39	1258.73
Mean	UN Subregion	NA	2.57939e+07	0.306549	1.23296e+07	1.22509e+07	8.71851e+06	2.19162e+06	1206.35	1.3396e+06	3.53243e+06	8.27748e+06	78623.6	441029	1.23997e+07	7592.92	1.23921e+07	78623.6	1.23135e+07	8008.15	1.23054e+07	8.71851e+06	3.58693e+06	441029	8.27748e+06	1206.35	1.3396e+06	2.24612e+06	54501	2.19162e+06	356916	84113.5	356549	366.931	24686.9	53936.8	535254	1328.63	967.034	361.594	1005.94	556.326	449.61	12916.7	6828.9	6087.76	186418	114880	71537.5
Min	UN Subregion	NA	2.57939e+07	0.306549	8.93678e+06	8.86736e+06	4.63145e+06	558843	0	0	918294	4.23669e+06	55004.5	328534	9.00506e+06	5506.42	8.99956e+06	55004.5	8.93014e+06	5418.9	8.924e+06	4.63145e+06	970567	328534	4.23669e+06	0	0	611724	33670.7	558843	249230	38156.5	248926	155.934	14961.8	37512.5	397655	965.882	699.976	263.211	639.464	330.659	277.731	6015.6	2808.35	2312.87	43952.5	26870.1	17082.3
Lower quartile	UN Subregion	NA	2.57939e+07	0.306549	1.15385e+07	1.14592e+07	7.81109e+06	1.77633e+06	0	607472	2.74781e+06	7.37362e+06	73780.7	414752	1.16105e+07	7073.72	1.16032e+07	73780.7	1.15222e+07	7318.52	1.15144e+07	7.81109e+06	2.80209e+06	414752	7.37362e+06	0	607472	1.83117e+06	48921.8	1.77633e+06	332786	72364.3	332462	312.978	22676.7	50287.8	504528	1235.89	899.116	336.442	904.286	494.616	405.532	10938.1	5533.98	4851.51	149890	91919.4	56358.4
Median	UN Subregion	NA	2.57939e+07	0.306549	1.227e+07	1.21948e+07	8.6986e+06	2.16068e+06	0	1.181e+06	3.39511e+06	8.25168e+06	78268.9	440276	1.23406e+07	7539.36	1.23333e+07	78268.9	1.22551e+07	7924.89	1.22474e+07	8.6986e+06	3.45035e+06	440276	8.25168e+06	0	1.181e+06	2.21225e+06	53911.6	2.16068e+06	355515	82274.5	355117	358.704	24524	53633.4	534319	1317.51	959.174	358.448	991.86	545.482	443.844	12576.9	6569.14	5828.93	182979	112260	69486.8
Upper quartile	UN Subregion	NA	2.57939e+07	0.306549	1.30846e+07	1.30074e+07	9.5947e+06	2.56795e+06	319.087	1.87316e+06	4.20396e+06	9.14661e+06	83138.1	466825	1.31554e+07	8051.74	1.3148e+07	83138.1	1.30734e+07	8632.45	1.30646e+07	9.5947e+06	4.26158e+06	466825	9.14661e+06	319.087	1.87316e+06	2.61999e+06	59358.9	2.56795e+06	380595	94479	380206	412.713	26564.7	57265.8	565097	1409.59	1026.22	383.052	1093.23	609.373	487.85	14544	7859.62	7065.32	218778	134369	84170.9
Max	UN Subregion	NA	2.57939e+07	0.306549	1.66832e+07	1.66089e+07	1.34197e+07	4.81906e+06	39548.8	5.59731e+06	8.30875e+06	1.30007e+07	104254	586189	1.67635e+07	10588.7	1.67537e+07	104254	1.66794e+07	11987.7	1.66689e+07	1.34197e+07	8.37306e+06	586189	1.30007e+07	39548.8	5.59731e+06	4.87343e+06	87962.5	4.81906e+06	478447	151765	477930	771.757	36953.1	76650.8	710268	1873.46	1358.79	514.665	1585.78	960.426	739.411	27488.1	19258.8	15497	405350	248013	187977
Mean	UN Subregion	Northern Africa	2.51331e+08	0.100412	6.85711e+07	5.62914e+07	5.62086e+07	608.202	82180.2	0	82788.4	8.90673e+06	1.22797e+07	4.73019e+07	7.58287e+07	328737	7.54999e+07	1.22797e+07	6.32202e+07	388868	6.28314e+07	5.62086e+07	6.62272e+06	4.73019e+07	8.90673e+06	82180.2	0	6.54054e+06	6.53993e+06	608.202	3.82575e+07	9.0444e+06	3.82182e+07	39347.9	6.52587e+06	5.75384e+06	6.02992e+07	57524.2	41868.9	15655.3	40342.7	16856.8	23485.9	1.98839e+06	1.05436e+06	934023	51.7883	22.8952	28.8931
Min	UN Subregion	Northern Africa	2.51331e+08	0.100412	6.57122e+07	5.30169e+07	5.29567e+07	0	42156.8	0	43268	8.38368e+06	1.08245e+07	4.42797e+07	7.29748e+07	296568	7.2667e+07	1.08245e+07	6.00894e+07	337389	5.97056e+07	5.29567e+07	5.52955e+06	4.42797e+07	8.38368e+06	42156.8	0	5.47482e+06	5.4745e+06	0	3.46362e+07	7.19391e+06	3.45954e+07	31072.7	4.62194e+06	4.0531e+06	5.76264e+07	51797.9	37643.6	14051.5	33841.5	14303.3	19509.2	1.59097e+06	820894	709152	0	0	0
Lower quartile	UN Subregion	Northern Africa	2.51331e+08	0.100412	6.80157e+07	5.57747e+07	5.56891e+07	0	65085.4	0	65595.9	8.787e+06	1.19714e+07	4.68114e+07	7.52028e+07	322669	7.4876e+07	1.19714e+07	6.26398e+07	377868	6.22507e+07	5.56891e+07	6.35509e+06	4.68114e+07	8.787e+06	65085.4	0	6.27732e+06	6.27684e+06	0	3.7665e+07	8.54544e+06	3.7626e+07	37081.5	6.03988e+06	5.28164e+06	5.97665e+07	56426.9	41076.3	15351.5	39028.2	16290.8	22659	1.89321e+06	990739	875642	0	0	0
Median	UN Subregion	Northern Africa	2.51331e+08	0.100412	6.85763e+07	5.62969e+07	5.62142e+07	48.6375	75968.1	0	76402.3	8.90145e+06	1.22706e+07	4.72988e+07	7.58212e+07	328332	7.5493e+07	1.22706e+07	6.32109e+07	388448	6.28232e+07	5.62142e+07	6.60583e+06	4.72988e+07	8.90145e+06	75968.1	0	6.52321e+06	6.52259e+06	48.6375	3.82862e+07	8.9918e+06	3.82488e+07	38999.7	6.51646e+06	5.74789e+06	6.03006e+07	57444.3	41811.7	15633.7	40288.4	16820.4	23432.4	1.97829e+06	1.04556e+06	926416	4.14234	1.85564	2.29516
Upper quartile	UN Subregion	Northern Africa	2.51331e+08	0.100412	6.91335e+07	5.68048e+07	5.67194e+07	438.949	93442.7	0	94019.9	9.01952e+06	1.25848e+07	4.77939e+07	7.64591e+07	334698	7.61286e+07	1.25848e+07	6.38118e+07	399144	6.34215e+07	5.67194e+07	6.87169e+06	4.77939e+07	9.01952e+06	93442.7	0	6.7861e+06	6.78533e+06	438.949	3.88691e+07	9.49159e+06	3.88282e+07	41256.5	7.00429e+06	6.22527e+06	6.08415e+07	58592.6	42655.1	15951	41591.9	17380.7	24281	2.07623e+06	1.10743e+06	985169	37.7104	17.0056	20.8669
Max	UN Subregion	Northern Africa	2.51331e+08	0.100412	7.15196e+07	5.90158e+07	5.89235e+07	10109.2	211942	0	211942	9.58206e+06	1.40411e+07	4.98703e+07	7.91929e+07	364734	7.88494e+07	1.40411e+07	6.63373e+07	453310	6.59188e+07	5.89235e+07	8.14354e+06	4.98703e+07	9.58206e+06	211942	0	8.08608e+06	8.08608e+06	10109.2	4.12832e+07	1.19915e+07	4.12395e+07	53138.1	8.44765e+06	7.609e+06	6.30714e+07	64539.3	46989.6	17549.7	46702	19831.5	27856.2	2.5956e+06	1.48888e+06	1.37122e+06	938.506	425.399	513.107
Mean	UN Subregion	Northern America	3.73537e+08	0.213399	2.43316e+08	2.43315e+08	1.66447e+08	7.04331e+07	2.70349e+06	3.73185e+06	7.68685e+07	1.66447e+08	1091.4	0	2.43823e+08	188108	2.43635e+08	1091.4	2.43634e+08	160680	2.43473e+08	1.66447e+08	7.70265e+07	0	1.66447e+08	2.70349e+06	3.73185e+06	7.05911e+07	157986	7.04331e+07	0	0	0	0	722.312	369.09	349879	32916.8	23957.9	8958.9	17769	10963.6	6805.39	3634.51	1926.11	1708.4	5.98625e+06	3.69272e+06	2.29353e+06
Min	UN Subregion	Northern America	3.73537e+08	0.213399	2.27399e+08	2.27397e+08	1.53922e+08	6.30057e+07	780262	1.51211e+06	6.85822e+07	1.53922e+08	0	0	2.27891e+08	175775	2.27711e+08	0	2.27709e+08	145672	2.27555e+08	1.53922e+08	6.87314e+07	0	1.53922e+08	780262	1.51211e+06	6.31625e+07	142197	6.30057e+07	0	0	0	0	0	0	324328	30824.1	22443.1	8381.03	16044	9885.57	6145.94	3145.76	1599.63	1410.69	5.36055e+06	3.30574e+06	2.02655e+06
Lower quartile	UN Subregion	Northern America	3.73537e+08	0.213399	2.40059e+08	2.40056e+08	1.63779e+08	6.88579e+07	2.14521e+06	3.08461e+06	7.50178e+07	1.63779e+08	227.471	0	2.40564e+08	185814	2.40379e+08	227.471	2.40377e+08	157995	2.40218e+08	1.63779e+08	7.51768e+07	0	1.63779e+08	2.14521e+06	3.08461e+06	6.90157e+07	154972	6.88579e+07	0	0	0	0	143.405	52.646	345220	32519.8	23668.7	8850.69	17430.2	10749.7	6668.97	3529.39	1851.09	1636.59	5.8441e+06	3.60218e+06	2.23316e+06
Median	UN Subregion	Northern America	3.73537e+08	0.213399	2.43192e+08	2.43192e+08	1.66363e+08	7.04167e+07	2.61393e+06	3.64152e+06	7.68537e+07	1.66363e+08	761.557	0	2.43696e+08	187988	2.43509e+08	761.557	2.43508e+08	160598	2.43347e+08	1.66363e+08	7.70111e+07	0	1.66363e+08	2.61393e+06	3.64152e+06	7.05719e+07	157964	7.04167e+07	0	0	0	0	486.329	209.286	349711	32897.7	23946.2	8952.49	17760.2	10952.7	6800.15	3627.81	1920.12	1701.86	5.97638e+06	3.68646e+06	2.28907e+06
Upper quartile	UN Subregion	Northern America	3.73537e+08	0.213399	2.46505e+08	2.46504e+08	1.68962e+08	7.19725e+07	3.16089e+06	4.27707e+06	7.86246e+07	1.68962e+08	1606.48	0	2.47011e+08	190298	2.46822e+08	1606.48	2.46822e+08	163207	2.46658e+08	1.68962e+08	7.87799e+07	0	1.68962e+08	3.16089e+06	4.27707e+06	7.21302e+07	161070	7.19725e+07	0	0	0	0	1051.74	530.011	354376	33305.9	24242.6	9065.65	18087.9	11161.4	6928.68	3731.23	1996.51	1773.65	6.12513e+06	3.78013e+06	2.34981e+06
Max	UN Subregion	Northern America	3.73537e+08	0.213399	2.58914e+08	2.58912e+08	1.79662e+08	7.94817e+07	7.13347e+06	8.03755e+06	8.86961e+07	1.79662e+08	6926.45	0	2.59424e+08	202099	2.5923e+08	6926.45	2.59228e+08	176897	2.59068e+08	1.79662e+08	8.88531e+07	0	1.79662e+08	7.13347e+06	8.03755e+06	7.96381e+07	173634	7.94817e+07	0	0	0	0	5789.15	3233.99	380775	35443.3	25782.5	9660.79	20232.3	12482.3	7750.03	4181.45	2353.02	2207.93	6.76911e+06	4.21819e+06	2.68235e+06
Mean	UN Subregion	Northern Europe	1.05542e+08	0.205334	5.12156e+07	5.11975e+07	2.70005e+07	1.20862e+07	1.83989e+06	1.02709e+07	2.4197e+07	2.70005e+07	18173.6	0	5.1324e+07	34649.9	5.12894e+07	18173.6	5.12712e+07	26927.2	5.12443e+07	2.70005e+07	2.42438e+07	0	2.70005e+07	1.83989e+06	1.02709e+07	1.2133e+07	46815.2	1.20862e+07	0	0	0	0	12001	6172.56	79750.8	6064.22	4413.83	1650.39	2986.75	1842.49	1144.26	1076.52	570.801	505.715	1.02664e+06	633335	393306
Min	UN Subregion	Northern Europe	1.05542e+08	0.205334	4.90419e+07	4.90256e+07	2.4346e+07	1.09801e+07	1.22438e+06	8.78467e+06	2.18104e+07	2.4346e+07	9481.05	0	4.91456e+07	31481.6	4.91118e+07	9481.05	4.90955e+07	23549.2	4.90696e+07	2.4346e+07	2.18592e+07	0	2.4346e+07	1.22438e+06	8.78467e+06	1.10276e+07	40788.4	1.09801e+07	0	0	0	0	4507.79	1344.73	66670.7	5511.13	4013.29	1497.84	2555.94	1580.85	973.941	899.77	450.916	381.496	911062	553681	334596
Lower quartile	UN Subregion	Northern Europe	1.05542e+08	0.205334	5.07429e+07	5.07252e+07	2.65246e+07	1.18537e+07	1.72482e+06	9.92144e+06	2.37517e+07	2.65246e+07	14925.8	0	5.08506e+07	33960.9	5.08175e+07	14925.8	5.07989e+07	26249.3	5.07711e+07	2.65246e+07	2.37995e+07	0	2.65246e+07	1.72482e+06	9.92144e+06	1.19003e+07	44912.6	1.18537e+07	0	0	0	0	9611.17	4518.11	76308.1	5945.72	4326.91	1617.92	2911.59	1795.04	1114.06	1017.66	530.486	469.432	1.00151e+06	615997	381509
Median	UN Subregion	Northern Europe	1.05542e+08	0.205334	5.1199e+07	5.11808e+07	2.70003e+07	1.20844e+07	1.83275e+06	1.02474e+07	2.41795e+07	2.70003e+07	16997.4	0	5.13068e+07	34590	5.12723e+07	16997.4	5.12528e+07	26865.2	5.12261e+07	2.70003e+07	2.4226e+07	0	2.70003e+07	1.83275e+06	1.02474e+07	1.21319e+07	46811	1.20844e+07	0	0	0	0	11470.9	5991.38	78793.9	6054.12	4406.5	1647.28	2981.03	1838.87	1142.27	1067.47	560.05	495.815	1.02542e+06	632512	392603
Upper quartile	UN Subregion	Northern Europe	1.05542e+08	0.205334	5.16623e+07	5.16443e+07	2.74613e+07	1.23156e+07	1.94967e+06	1.05982e+07	2.46235e+07	2.74613e+07	21108.3	0	5.17713e+07	35275.1	5.17367e+07	21108.3	5.17183e+07	27538.1	5.16909e+07	2.74613e+07	2.46717e+07	0	2.74613e+07	1.94967e+06	1.05982e+07	1.23612e+07	48724.7	1.23156e+07	0	0	0	0	13861.3	7465.58	82916.1	6175.29	4495.02	1680.89	3059.48	1887.96	1173.55	1126.08	601.192	531.889	1.05101e+06	649635	404587
Max	UN Subregion	Northern Europe	1.05542e+08	0.205334	5.38335e+07	5.38091e+07	2.96402e+07	1.35827e+07	2.45338e+06	1.21284e+07	2.65699e+07	2.96402e+07	38908	0	5.39423e+07	38369.1	5.39054e+07	38908	5.3881e+07	31603.2	5.38534e+07	2.96402e+07	2.66199e+07	0	2.96402e+07	2.45338e+06	1.21284e+07	1.36305e+07	53166.3	1.35827e+07	0	0	0	0	30969.4	16700.6	101757	6752.09	4904.43	1847.67	3412.06	2111.69	1316.59	1374.02	875.47	769.407	1.18326e+06	736939	466463
Mean	UN Subregion	Polynesia	702876	0.194467	313011	287785	267493	20192.8	99.376	0	20292.2	200913	25225.9	66580	322515	1210.64	321304	25225.9	296078	1142.5	294935	267493	27442.4	66580	200913	99.376	0	27343	7150.26	20192.8	53639.3	12940.7	53583.7	55.6217	13229.9	11996.1	94159.1	211.774	154.158	57.616	140.1	63.0311	77.0691	2142.78	1137.93	1004.85	1704.43	1041.63	662.803
Min	UN Subregion	Polynesia	702876	0.194467	164473	143824	141800	112.719	27.9657	0	146.916	84832.1	15176	30851.5	173809	813.519	172915	15176	152266	516.845	151516	141800	3783.35	30851.5	84832.1	27.9657	0	3733.6	2230.58	112.719	23271.7	3206.55	23239.1	12.7876	6576.49	5134.68	57443.2	144.365	105.5	38.8654	56.7264	23.9663	30.6493	513.161	221.491	125.853	7.73743	3.65437	3.51025
Lower quartile	UN Subregion	Polynesia	702876	0.194467	266177	240991	223059	5416.51	48.039	0	5498.49	158082	22288.9	58257.3	275457	1124.29	274310	22288.9	249507	966.691	248469	223059	12599.6	58257.3	158082	48.039	0	12495.7	5481.45	5416.51	45495.2	8786.05	45449	37.4295	11126.9	10045.4	84982.7	196.288	142.828	53.372	117.194	51.9522	62.9257	1553.47	758.744	662.822	453.595	272.693	174.356
Median	UN Subregion	Polynesia	702876	0.194467	303064	278603	259493	12315.8	52.5372	0	12441.3	191496	24479	66069.9	312802	1203.88	311560	24479	286626	1117.78	285609	259493	19933.8	66069.9	191496	52.5372	0	19832.7	6857.92	12315.8	52902.1	11655.6	52835.5	49.6092	12783.8	11595.4	93471.4	210.352	153.117	57.1921	136.774	61.2801	74.5321	1998.02	1027.82	893.019	1057.7	648.518	406.428
Upper quartile	UN Subregion	Polynesia	702876	0.194467	358996	334109	305632	29219.4	66.5299	0	29349.6	239219	27559.1	73342.3	368576	1290.19	367269	27559.1	342741	1290.24	341576	305632	36415.6	73342.3	239219	66.5299	0	36292.3	8513.45	29219.4	60373.9	15826.4	60303.4	67.9503	14787.3	13527.8	102299	226.197	164.727	61.6188	159.43	72.162	88.378	2570.9	1400.9	1231.96	2439.26	1497.6	921.435
Max	UN Subregion	Polynesia	702876	0.194467	481814	453443	444232	136203	400.519	0	136241	366455	42615.2	111988	491572	1785.97	490129	42615.2	461758	2502.37	460051	444232	144131	111988	366455	400.519	0	144093	18443.4	136203	94949.9	43552.3	94797.4	245.706	28006.6	26222.5	141510	310.059	227.092	83.9733	327.017	145.864	185.929	6300.79	4345.86	4502.03	12004.9	8365.49	5690.86
Mean	UN Subregion	South-eastern Asia	6.68357e+08	0.194741	1.71355e+08	1.30682e+08	1.27885e+08	408156	1.1316e+06	1.25785e+06	2.7976e+06	4.44225e+07	4.06729e+07	8.34621e+07	1.89553e+08	1.13215e+06	1.88421e+08	4.06729e+07	1.47748e+08	1.01371e+06	1.46734e+08	1.27885e+08	1.88496e+07	8.34621e+07	4.44225e+07	1.1316e+06	1.25785e+06	1.64601e+07	1.6052e+07	408156	6.75313e+07	1.59308e+07	6.7462e+07	69337.4	2.12756e+07	1.93973e+07	1.26281e+08	198131	144206	53924.7	125398	52882	72516	4.87469e+06	2.58285e+06	2.29184e+06	34728.5	17582.6	17145.9
Min	UN Subregion	South-eastern Asia	6.68357e+08	0.194741	1.66812e+08	1.25472e+08	1.22748e+08	214819	996696	1.25785e+06	2.54114e+06	4.24514e+07	3.71183e+07	7.92505e+07	1.84503e+08	1.0847e+06	1.83409e+08	3.71183e+07	1.42675e+08	940616	1.41724e+08	1.22748e+08	1.68678e+07	7.92505e+07	4.24514e+07	996696	1.25785e+06	1.45247e+07	1.42302e+07	214819	6.35993e+07	1.40173e+07	6.35351e+07	60805.4	1.86384e+07	1.75782e+07	1.22126e+08	189072	137675	51396.7	113873	47974	65732.8	4.30011e+06	2.20197e+06	1.93983e+06	15529.6	7520.27	7279.92
Lower quartile	UN Subregion	South-eastern Asia	6.68357e+08	0.194741	1.70456e+08	1.29849e+08	1.27056e+08	326186	1.08687e+06	1.25785e+06	2.70232e+06	4.40376e+07	4.00656e+07	8.27317e+07	1.88584e+08	1.12281e+06	1.8746e+08	4.00656e+07	1.46808e+08	997543	1.458e+08	1.27056e+08	1.84344e+07	8.27317e+07	4.40376e+07	1.08687e+06	1.25785e+06	1.60522e+07	1.56566e+07	326186	6.68475e+07	1.55585e+07	6.67789e+07	67683.1	2.08329e+07	1.90039e+07	1.25447e+08	196477	142999	53464.9	123188	51844.1	71120.5	4.72824e+06	2.48399e+06	2.19954e+06	27707.5	14184.4	13283
Median	UN Subregion	South-eastern Asia	6.68357e+08	0.194741	1.71365e+08	1.30693e+08	1.27895e+08	378128	1.11767e+06	1.25785e+06	2.76849e+06	4.44209e+07	4.06604e+07	8.34586e+07	1.89541e+08	1.13205e+06	1.8841e+08	4.06604e+07	1.47761e+08	1.0132e+06	1.46751e+08	1.27895e+08	1.88265e+07	8.34586e+07	4.44209e+07	1.11767e+06	1.25785e+06	1.64338e+07	1.60211e+07	378128	6.75445e+07	1.59296e+07	6.74743e+07	69280.3	2.12632e+07	1.93906e+07	1.26278e+08	198090	144161	53916	125354	52865.8	72452.7	4.86004e+06	2.57359e+06	2.28319e+06	32196.5	16471.2	15783.1
Upper quartile	UN Subregion	South-eastern Asia	6.68357e+08	0.194741	1.72232e+08	1.31524e+08	1.28715e+08	449173	1.15956e+06	1.25785e+06	2.85822e+06	4.47895e+07	4.12612e+07	8.4192e+07	1.90492e+08	1.14108e+06	1.89359e+08	4.12612e+07	1.48678e+08	1.029e+06	1.47665e+08	1.28715e+08	1.92348e+07	8.4192e+07	4.47895e+07	1.15956e+06	1.25785e+06	1.68468e+07	1.64308e+07	449173	6.82117e+07	1.62758e+07	6.81425e+07	70930.2	2.16972e+07	1.97706e+07	1.271e+08	199751	145372	54370.7	127678	53900.8	73877.7	5.00827e+06	2.67138e+06	2.37162e+06	38577.7	19570.4	19130.9
Max	UN Subregion	South-eastern Asia	6.68357e+08	0.194741	1.76208e+08	1.35551e+08	1.32766e+08	1.08964e+06	1.49603e+06	1.25785e+06	3.69332e+06	4.62057e+07	4.39438e+07	8.85471e+07	1.95104e+08	1.19136e+06	1.93937e+08	4.39438e+07	1.53272e+08	1.10579e+06	1.52188e+08	1.32766e+08	2.14072e+07	8.85471e+07	4.62057e+07	1.49603e+06	1.25785e+06	1.90407e+07	1.85427e+07	1.08964e+06	7.16029e+07	1.80927e+07	7.15228e+07	80070.4	2.37088e+07	2.16896e+07	1.30883e+08	208680	151848	56831.8	140482	58824	81657.9	5.84493e+06	3.30332e+06	2.89534e+06	95027.1	46420.2	51696
Mean	UN Subregion	Southern Asia	1.96931e+09	0.177256	3.5807e+08	2.6421e+08	2.5545e+08	216835	8.54392e+06	0	8.76076e+06	9.06952e+06	9.38602e+07	2.4638e+08	4.12162e+08	2.79705e+06	4.09365e+08	9.38602e+07	3.15504e+08	2.4882e+06	3.13016e+08	2.5545e+08	5.75667e+07	2.4638e+08	9.06952e+06	8.54392e+06	0	4.90228e+07	4.88059e+07	216835	1.99318e+08	4.70622e+07	1.99113e+08	204566	5.34883e+07	4.03719e+07	3.45525e+08	489493	356270	133223	248920	103985	144936	1.48277e+07	7.85612e+06	6.97155e+06	18446.9	8183	10263.9
Min	UN Subregion	Southern Asia	1.96931e+09	0.177256	3.47106e+08	2.54509e+08	2.46306e+08	144193	6.76106e+06	0	6.93276e+06	7.90756e+06	8.64922e+07	2.36763e+08	4.01542e+08	2.69442e+06	3.98843e+08	8.64922e+07	3.06579e+08	2.3401e+06	3.04153e+08	2.46306e+08	5.27903e+07	2.36763e+08	7.90756e+06	6.76106e+06	0	4.43574e+07	4.40785e+07	144193	1.91833e+08	4.21871e+07	1.91639e+08	183879	4.85961e+07	3.63516e+07	3.34514e+08	470225	342412	127812	228495	95518.3	132976	1.34645e+07	7.01705e+06	6.13729e+06	9565.71	4157.34	5283.4
Lower quartile	UN Subregion	Southern Asia	1.96931e+09	0.177256	3.5625e+08	2.62528e+08	2.53783e+08	189505	8.13303e+06	0	8.35129e+06	8.82599e+06	9.26359e+07	2.44709e+08	4.10125e+08	2.77688e+06	4.07347e+08	9.26359e+07	3.13626e+08	2.46053e+06	3.1116e+08	2.53783e+08	5.66771e+07	2.44709e+08	8.82599e+06	8.13303e+06	0	4.81836e+07	4.79608e+07	189505	1.97727e+08	4.61303e+07	1.97519e+08	200366	5.25216e+07	3.95475e+07	3.43683e+08	485947	353657	132245	245094	102294	142634	1.45248e+07	7.65626e+06	6.79155e+06	15891	7019.62	8826.84
Median	UN Subregion	Southern Asia	1.96931e+09	0.177256	3.58069e+08	2.64205e+08	2.55442e+08	211568	8.51567e+06	0	8.73047e+06	9.07504e+06	9.38544e+07	2.46343e+08	4.12128e+08	2.79679e+06	4.09334e+08	9.38544e+07	3.15486e+08	2.48827e+06	3.12993e+08	2.55442e+08	5.75266e+07	2.46343e+08	9.07504e+06	8.51567e+06	0	4.89943e+07	4.87835e+07	211568	1.99306e+08	4.70262e+07	1.99101e+08	204406	5.34572e+07	4.0369e+07	3.45507e+08	489415	356226	133216	248779	103892	144900	1.48077e+07	7.84431e+06	6.96279e+06	18066.5	8011.32	10040.5
Upper quartile	UN Subregion	Southern Asia	1.96931e+09	0.177256	3.5989e+08	2.65887e+08	2.57116e+08	238078	8.91337e+06	0	9.12942e+06	9.31836e+06	9.50518e+07	2.48045e+08	4.14157e+08	2.81649e+06	4.11346e+08	9.50518e+07	3.17363e+08	2.51562e+06	3.1486e+08	2.57116e+08	5.8429e+07	2.48045e+08	9.31836e+06	8.91337e+06	0	4.98041e+07	4.95864e+07	238078	2.00923e+08	4.79779e+07	2.00716e+08	208630	5.44328e+07	4.11976e+07	3.4731e+08	492998	358834	134179	252631	105622	147181	1.51194e+07	8.03875e+06	7.13689e+06	20576.1	9170.52	11457.3
Max	UN Subregion	Southern Asia	1.96931e+09	0.177256	3.66428e+08	2.74205e+08	2.65583e+08	395807	1.06565e+07	0	1.08576e+07	1.02189e+07	1.01422e+08	2.56464e+08	4.22294e+08	2.9177e+06	4.19454e+08	1.01422e+08	3.2745e+08	2.6407e+06	3.24849e+08	2.65583e+08	6.29909e+07	2.56464e+08	1.02189e+07	1.06565e+07	0	5.45069e+07	5.42173e+07	395807	2.07161e+08	5.24365e+07	2.0696e+08	227077	5.90128e+07	4.48681e+07	3.54726e+08	510144	371346	138988	269509	114485	158175	1.73358e+07	9.02069e+06	8.32954e+06	35106.7	15587.8	19681
Mean	UN Subregion	Southern Europe	1.50725e+08	0.256241	7.79461e+07	7.66196e+07	6.00774e+07	1.39868e+07	715718	1.83975e+06	1.65422e+07	5.75037e+07	1.32646e+06	2.5737e+06	7.85528e+07	80872.4	7.84719e+07	1.32646e+06	7.71454e+07	89067.6	7.70564e+07	6.00774e+07	1.6979e+07	2.5737e+06	5.75037e+07	715718	1.83975e+06	1.44235e+07	436746	1.39868e+07	2.08299e+06	490709	2.08085e+06	2139.4	406969	919493	4.0701e+06	14153.3	10301.6	3851.67	11311.9	6445.5	4866.37	116605	61547.6	55057.5	1.18944e+06	733968	455474
Min	UN Subregion	Southern Europe	1.50725e+08	0.256241	7.28129e+07	7.14954e+07	5.58851e+07	1.1254e+07	715205	1.21558e+06	1.36994e+07	5.33549e+07	1.18281e+06	2.32651e+06	7.34398e+07	75763.2	7.3361e+07	1.18281e+06	7.20436e+07	79078.1	7.1956e+07	5.58851e+07	1.41022e+07	2.32651e+06	5.33549e+07	715205	1.21558e+06	1.16568e+07	325321	1.1254e+07	1.484e+06	225753	1.48263e+06	895.187	313691	806419	3.76387e+06	13264	9654.53	3599.84	9741.55	5519.25	4149.87	82318.1	40212.3	34934.9	919240	568875	350365
Lower quartile	UN Subregion	Southern Europe	1.50725e+08	0.256241	7.7025e+07	7.56949e+07	5.91557e+07	1.34226e+07	715230	1.63682e+06	1.59451e+07	5.65782e+07	1.29783e+06	2.52506e+06	7.76282e+07	79841.7	7.75483e+07	1.29783e+06	7.6216e+07	87025.6	7.61305e+07	5.91557e+07	1.63822e+07	2.52506e+06	5.65782e+07	715230	1.63682e+06	1.38503e+07	403820	1.34226e+07	1.98946e+06	386767	1.98733e+06	1646.05	385281	893915	4.00831e+06	13963.8	10163.6	3799.86	10990.7	6252.26	4718.43	104751	54113.3	47947	1.13718e+06	701100	433557
Median	UN Subregion	Southern Europe	1.50725e+08	0.256241	7.7924e+07	7.66005e+07	6.00664e+07	1.39615e+07	715320	1.81298e+06	1.65128e+07	5.74977e+07	1.32577e+06	2.5724e+06	7.8539e+07	80848.2	7.84572e+07	1.32577e+06	7.7131e+07	88993.4	7.70436e+07	6.00664e+07	1.69452e+07	2.5724e+06	5.74977e+07	715320	1.81298e+06	1.44016e+07	430091	1.39615e+07	2.10198e+06	466121	2.09998e+06	2011.99	406716	919031	4.06916e+06	14147.9	10297.2	3850	11300.6	6431.02	4858.26	113794	59652.7	53107.6	1.18732e+06	731687	454443
Upper quartile	UN Subregion	Southern Europe	1.50725e+08	0.256241	7.88637e+07	7.75345e+07	6.09958e+07	1.4524e+07	715617	2.01749e+06	1.71199e+07	5.84205e+07	1.35429e+06	2.6202e+06	7.9475e+07	81866.9	7.93941e+07	1.35429e+06	7.80622e+07	91036.7	7.79732e+07	6.09958e+07	1.7566e+07	2.6202e+06	5.84205e+07	715617	2.01749e+06	1.49661e+07	462944	1.4524e+07	2.19189e+06	575738	2.18959e+06	2523.06	427696	944542	4.1321e+06	14333.6	10432.5	3902.67	11623.5	6628.75	5008.34	125486	66576.6	59804	1.23691e+06	765213	475754
Max	UN Subregion	Southern Europe	1.50725e+08	0.256241	8.2313e+07	8.10399e+07	6.49193e+07	1.70329e+07	726334	2.88896e+06	2.00529e+07	6.22498e+07	1.53162e+06	2.8628e+06	8.28349e+07	86767.5	8.27531e+07	1.53162e+06	8.148e+07	99677.8	8.13865e+07	6.49193e+07	2.05074e+07	2.8628e+06	6.22498e+07	726334	2.88896e+06	1.74874e+07	620772	1.70329e+07	2.50769e+06	1.03779e+06	2.50537e+06	4956.25	503196	1.06213e+06	4.38339e+06	15249.1	11099.8	4149.37	13456.6	7817.82	5777.03	202117	125328	119161	1.48033e+06	916573	577343
Mean	UN Subregion	Sub-Saharan Africa	1.109e+09	0.246452	2.07143e+08	9.27093e+07	9.205e+07	164374	312765	182097	659236	9.43939e+06	1.14434e+08	8.26107e+07	2.28887e+08	2.79681e+06	2.2609e+08	1.14434e+08	1.11656e+08	1.09054e+06	1.10566e+08	9.205e+07	1.85157e+07	8.26107e+07	9.43939e+06	312765	182097	1.80208e+07	1.78565e+07	164374	6.68135e+07	1.57972e+07	6.67449e+07	68604.7	7.20858e+07	4.23481e+07	2.00932e+08	489407	356204	133203	103734	43646.2	60087.9	5.42524e+06	2.87527e+06	2.54997e+06	13996	6682.17	7313.81
Min	UN Subregion	Sub-Saharan Africa	1.109e+09	0.246452	2.00598e+08	8.72127e+07	8.65289e+07	125860	264850	182097	582473	7.98711e+06	1.08652e+08	7.7122e+07	2.21946e+08	2.67766e+06	2.19188e+08	1.08652e+08	1.06314e+08	1.01533e+06	1.05276e+08	8.65289e+07	1.6917e+07	7.7122e+07	7.98711e+06	264850	182097	1.64189e+07	1.62563e+07	125860	6.17426e+07	1.31593e+07	6.16784e+07	56033.6	6.77583e+07	3.84235e+07	1.9424e+08	469463	341498	127746	93431.8	39261.2	53807.7	4.8792e+06	2.45814e+06	2.17556e+06	6367.96	2285.58	3520.24
Lower quartile	UN Subregion	Sub-Saharan Africa	1.109e+09	0.246452	2.06051e+08	9.16157e+07	9.09551e+07	145595	308697	182097	639573	9.18937e+06	1.13444e+08	8.15423e+07	2.2774e+08	2.77409e+06	2.24956e+08	1.13444e+08	1.10512e+08	1.07236e+06	1.0943e+08	9.09551e+07	1.81235e+07	8.15423e+07	9.18937e+06	308697	182097	1.76304e+07	1.74667e+07	145595	6.58449e+07	1.52421e+07	6.57781e+07	66129	7.12686e+07	4.16167e+07	1.99835e+08	485357	353270	132095	101291	42618.3	58590.9	5.28887e+06	2.78575e+06	2.46473e+06	11895.5	5494.14	6249.67
Median	UN Subregion	Sub-Saharan Africa	1.109e+09	0.246452	2.07175e+08	9.27069e+07	9.20447e+07	160630	314181	182097	656531	9.44388e+06	1.14432e+08	8.26017e+07	2.2891e+08	2.7964e+06	2.26111e+08	1.14432e+08	1.11628e+08	1.08922e+06	1.10535e+08	9.20447e+07	1.84906e+07	8.26017e+07	9.44388e+06	314181	182097	1.79965e+07	1.7831e+07	160630	6.67937e+07	1.57511e+07	6.67251e+07	68448.8	7.20657e+07	4.23384e+07	2.00922e+08	489279	356136	133174	103496	43560	59933.5	5.41642e+06	2.86419e+06	2.5403e+06	13879.9	6537.55	7277.11
Upper quartile	UN Subregion	Sub-Saharan Africa	1.109e+09	0.246452	2.08252e+08	9.37595e+07	9.31033e+07	178775	320213	182097	676430	9.70685e+06	1.15426e+08	8.36405e+07	2.30076e+08	2.81893e+06	2.27266e+08	1.15426e+08	1.12786e+08	1.10779e+06	1.11689e+08	9.31033e+07	1.8864e+07	8.36405e+07	9.70685e+06	320213	182097	1.83692e+07	1.82042e+07	178775	6.77755e+07	1.63102e+07	6.77065e+07	70823	7.28782e+07	4.30673e+07	2.02062e+08	493417	359100	134310	105897	44540.9	61441.9	5.54881e+06	2.95397e+06	2.62723e+06	15794.6	7694.94	8286.16
Max	UN Subregion	Sub-Saharan Africa	1.109e+09	0.246452	2.1275e+08	9.80143e+07	9.73472e+07	278940	362654	182097	777301	1.05457e+07	1.19967e+08	8.84559e+07	2.34663e+08	2.91086e+06	2.31808e+08	1.19967e+08	1.17504e+08	1.19093e+06	1.16347e+08	9.73472e+07	2.13307e+07	8.84559e+07	1.05457e+07	362654	182097	2.08417e+07	2.06857e+07	278940	7.15989e+07	1.94173e+07	7.1524e+07	82418.6	7.64679e+07	4.62316e+07	2.06364e+08	510675	371931	138744	123319	54038.9	70446.6	6.29268e+06	3.43504e+06	3.13352e+06	27141.4	14963.8	13328.2
Mean	UN Subregion	Western Asia	2.85991e+08	0.149313	1.10475e+08	9.74777e+07	9.33194e+07	3.50233e+06	360277	295650	4.15825e+06	6.37924e+07	1.29975e+07	2.95271e+07	1.17316e+08	281322	1.17035e+08	1.29975e+07	1.04038e+08	322084	1.03715e+08	9.33194e+07	1.0396e+07	2.95271e+07	6.37924e+07	360277	295650	9.74009e+06	6.23776e+06	3.50233e+06	2.38878e+07	5.63925e+06	2.38632e+07	24563.7	5.47373e+06	7.52382e+06	4.3128e+07	49235.4	35834.6	13400.8	38340.8	17214.7	21126.1	1.88644e+06	998891	887544	297911	180527	117384
Min	UN Subregion	Western Asia	2.85991e+08	0.149313	1.03312e+08	9.0725e+07	8.59619e+07	2.24026e+06	301352	94237.1	2.85739e+06	5.78518e+07	1.0664e+07	2.51528e+07	1.09413e+08	255333	1.0915e+08	1.0664e+07	9.661e+07	269713	9.62989e+07	8.59619e+07	8.28115e+06	2.51528e+07	5.78518e+07	301352	94237.1	7.75531e+06	4.76814e+06	2.24026e+06	2.02201e+07	3.93367e+06	2.0193e+07	15940.7	4.16478e+06	6.08936e+06	3.88311e+07	44648.9	32490.6	12158.3	30674	13965.7	16708.3	1.40624e+06	717942	604431	162884	93552	63037.7
Lower quartile	UN Subregion	Western Asia	2.85991e+08	0.149313	1.08963e+08	9.59506e+07	9.18175e+07	3.08797e+06	338268	223173	3.74073e+06	6.26207e+07	1.24951e+07	2.85225e+07	1.15758e+08	276477	1.15482e+08	1.24951e+07	1.02489e+08	311743	1.02165e+08	9.18175e+07	9.86323e+06	2.85225e+07	6.26207e+07	338268	223173	9.21201e+06	5.89167e+06	3.08797e+06	2.2999e+07	5.17856e+06	2.29753e+07	22553.7	5.16975e+06	7.21053e+06	4.21279e+07	48342.2	35183.8	13159.1	36787.5	16503.3	20206.1	1.7594e+06	916901	811866	260554	156658	101460
Median	UN Subregion	Western Asia	2.85991e+08	0.149313	1.1049e+08	9.74726e+07	9.33148e+07	3.43749e+06	354195	275493	4.09089e+06	6.38156e+07	1.29797e+07	2.93878e+07	1.17337e+08	281221	1.17058e+08	1.29797e+07	1.04036e+08	321451	1.03705e+08	9.33148e+07	1.0347e+07	2.93878e+07	6.38156e+07	354195	275493	9.68571e+06	6.20795e+06	3.43749e+06	2.38012e+07	5.57862e+06	2.37782e+07	24313.7	5.4469e+06	7.50544e+06	4.30046e+07	49214.1	35824.3	13391.6	38213.7	17160.3	21064.1	1.87056e+06	986147	877221	291981	176741	114990
Upper quartile	UN Subregion	Western Asia	2.85991e+08	0.149313	1.11962e+08	9.89534e+07	9.47959e+07	3.85744e+06	376455	352588	4.52225e+06	6.49694e+07	1.34796e+07	3.04391e+07	1.18826e+08	286131	1.18544e+08	1.34796e+07	1.05532e+08	331817	1.05208e+08	9.47959e+07	1.09057e+07	3.04391e+07	6.49694e+07	376455	352588	1.02386e+07	6.53575e+06	3.85744e+06	2.47206e+07	6.03424e+06	2.46943e+07	26307.4	5.72587e+06	7.81137e+06	4.40575e+07	50069.7	36450.5	13632.5	39842.1	17896.4	21964.4	1.99282e+06	1.06749e+06	947861	329313	200808	130837
Max	UN Subregion	Western Asia	2.85991e+08	0.149313	1.18012e+08	1.05729e+08	1.01807e+08	5.98578e+06	528085	580087	6.64325e+06	7.02214e+07	1.58155e+07	3.43267e+07	1.25354e+08	310204	1.25061e+08	1.58155e+07	1.12672e+08	379435	1.12325e+08	1.01807e+08	1.4011e+07	3.43267e+07	7.02214e+07	528085	580087	1.31833e+07	8.82314e+06	5.98578e+06	2.82669e+07	9.03386e+06	2.82377e+07	41346.7	7.41457e+06	9.47443e+06	4.83044e+07	54477.2	39619.1	14858.1	49828.9	22390.6	28224.9	2.82537e+06	1.6137e+06	1.47047e+06	518962	323028	219210
Mean	UN Subregion	Western Europe	1.95039e+08	0.291076	9.45137e+07	9.45137e+07	3.8366e+07	2.14038e+07	4.98629e+06	2.97575e+07	5.61477e+07	3.8366e+07	0	0	9.47328e+07	76028.1	9.46568e+07	0	9.46568e+07	65106.8	9.45917e+07	3.8366e+07	5.62257e+07	0	3.8366e+07	4.98629e+06	2.97575e+07	2.14819e+07	78014.6	2.14038e+07	0	0	0	0	0	0	141135	13305	9683.76	3621.19	7553.09	4660.52	2892.57	1793.84	950.398	843.441	1.81959e+06	1.12251e+06	697076
Min	UN Subregion	Western Europe	1.95039e+08	0.291076	8.9903e+07	8.9903e+07	3.33285e+07	1.94696e+07	3.75085e+06	2.45248e+07	5.10109e+07	3.33285e+07	0	0	9.01145e+07	70743.3	9.00426e+07	0	9.00426e+07	58623.3	8.99822e+07	3.33285e+07	5.10884e+07	0	3.33285e+07	3.75085e+06	2.45248e+07	1.95465e+07	71218.9	1.94696e+07	0	0	0	0	0	0	130583	12397	9029.24	3367.79	6605.81	4058.02	2544.69	1603.26	807.324	707.839	1.65236e+06	1.01824e+06	625404
Lower quartile	UN Subregion	Western Europe	1.95039e+08	0.291076	9.36632e+07	9.36632e+07	3.73662e+07	2.09946e+07	4.73986e+06	2.88627e+07	5.50935e+07	3.73662e+07	0	0	9.38807e+07	74896.5	9.38048e+07	0	9.38048e+07	63765.4	9.37412e+07	3.73662e+07	5.51725e+07	0	3.73662e+07	4.73986e+06	2.88627e+07	2.1072e+07	76755.1	2.09946e+07	0	0	0	0	0	0	138865	13104.2	9537.24	3566.27	7359.38	4536.56	2812.98	1751.46	919.247	814.901	1.78176e+06	1.09811e+06	681266
Median	UN Subregion	Western Europe	1.95039e+08	0.291076	9.45011e+07	9.45011e+07	3.83626e+07	2.13998e+07	4.9846e+06	2.97328e+07	5.61414e+07	3.83626e+07	0	0	9.47203e+07	75994	9.46436e+07	0	9.46436e+07	65110.1	9.4577e+07	3.83626e+07	5.62194e+07	0	3.83626e+07	4.9846e+06	2.97328e+07	2.14766e+07	78043.9	2.13998e+07	0	0	0	0	0	0	141088	13300.3	9680.09	3619.32	7545.14	4653.7	2888.5	1793.45	948.085	842.105	1.81883e+06	1.12227e+06	696695
Upper quartile	UN Subregion	Western Europe	1.95039e+08	0.291076	9.53556e+07	9.53556e+07	3.93844e+07	2.18135e+07	5.22247e+06	3.06277e+07	5.71819e+07	3.93844e+07	0	0	9.55767e+07	77117.3	9.55004e+07	0	9.55004e+07	66350.5	9.5433e+07	3.93844e+07	5.72599e+07	0	3.93844e+07	5.22247e+06	3.06277e+07	2.18925e+07	79311.4	2.18135e+07	0	0	0	0	0	0	143292	13497.1	9823.23	3674.62	7735.29	4774.76	2964.77	1834.99	979.4	870.722	1.85658e+06	1.14611e+06	712111
Max	UN Subregion	Western Europe	1.95039e+08	0.291076	9.88845e+07	9.88845e+07	4.4114e+07	2.37221e+07	6.50472e+06	3.47601e+07	6.13284e+07	4.4114e+07	0	0	9.91106e+07	83653.3	9.90311e+07	0	9.90311e+07	72181.5	9.89605e+07	4.4114e+07	6.14059e+07	0	4.4114e+07	6.50472e+06	3.47601e+07	2.38017e+07	84897.9	2.37221e+07	0	0	0	0	0	0	154731	14645.8	10646.3	3999.56	8681.2	5377.31	3344.66	2005.68	1165.7	1047.7	2.00589e+06	1.25288e+06	784397
Mean	UN Intermediate region	Caribbean	4.39122e+07	0.246881	1.52077e+07	1.20714e+07	1.175e+07	311367	10064.6	0	321432	1.04444e+07	3.13629e+06	1.30557e+06	1.62586e+07	86099.6	1.61725e+07	3.13629e+06	1.30362e+07	50480.6	1.29857e+07	1.175e+07	1.23576e+06	1.30557e+06	1.04444e+07	10064.6	0	1.2257e+06	914332	311367	1.05776e+06	247805	1.05668e+06	1083.49	1.69509e+06	1.4412e+06	4.57844e+06	15064.6	10964.3	4100.32	5766.24	2582.13	3184.11	276773	146659	130114	26440.7	15538	10902.7
Min	UN Intermediate region	Caribbean	4.39122e+07	0.246881	1.39965e+07	1.07721e+07	1.04978e+07	177014	4288.69	0	186156	9.38166e+06	2.67019e+06	1.0226e+06	1.50233e+07	73671.6	1.4933e+07	2.67019e+06	1.17086e+07	40881.1	1.16633e+07	1.04978e+07	972418	1.0226e+06	9.38166e+06	4288.69	0	965229	692457	177014	727497	96559.7	726917	392.44	1.28267e+06	1.16222e+06	4.0319e+06	12732.9	9297.91	3435.02	4456.2	2056.76	2391.33	200647	98786.4	86733.7	14445.1	7977.6	6304.03
Lower quartile	UN Intermediate region	Caribbean	4.39122e+07	0.246881	1.49676e+07	1.18571e+07	1.15361e+07	275803	8581.28	0	285860	1.02431e+07	3.04259e+06	1.23279e+06	1.60117e+07	83313.4	1.5927e+07	3.04259e+06	1.281e+07	48311.3	1.276e+07	1.15361e+07	1.16996e+06	1.23279e+06	1.02431e+07	8581.28	0	1.15999e+06	856647	275803	990513	201777	989581	877.539	1.61577e+06	1.37778e+06	4.48214e+06	14568.1	10605.1	3962.86	5464.44	2449.28	3008.25	255697	132892	117239	23367.1	13637.5	9631.79
Median	UN Intermediate region	Caribbean	4.39122e+07	0.246881	1.51994e+07	1.20707e+07	1.1747e+07	308368	9858.37	0	318501	1.04398e+07	3.13285e+06	1.29939e+06	1.62498e+07	86009.2	1.61631e+07	3.13285e+06	1.30278e+07	50321	1.29777e+07	1.1747e+07	1.22998e+06	1.29939e+06	1.04398e+07	9858.37	0	1.2199e+06	908751	308368	1.05546e+06	240363	1.05468e+06	1043.13	1.69317e+06	1.44059e+06	4.57509e+06	15043.8	10948.5	4093.72	5739.67	2570.18	3168.56	274498	144433	127847	26164.5	15367.4	10758.9
Upper quartile	UN Intermediate region	Caribbean	4.39122e+07	0.246881	1.5436e+07	1.22887e+07	1.19558e+07	342339	11340	0	352647	1.06398e+07	3.22992e+06	1.36848e+06	1.64949e+07	88733.6	1.6409e+07	3.22992e+06	1.32582e+07	52454.2	1.3207e+07	1.19558e+07	1.29635e+06	1.36848e+06	1.06398e+07	11340	0	1.28628e+06	964388	342339	1.12691e+06	287102	1.12578e+06	1251.75	1.77068e+06	1.50232e+06	4.67563e+06	15544.7	11311.5	4233.69	6032.97	2700.29	3340.12	294373	157663	140337	29203	17165.9	12038.4
Max	UN Intermediate region	Caribbean	4.39122e+07	0.246881	1.6507e+07	1.32411e+07	1.28646e+07	525249	21454.4	0	537362	1.16154e+07	3.66441e+06	1.71095e+06	1.76806e+07	100600	1.75864e+07	3.66441e+06	1.42164e+07	62801.6	1.41642e+07	1.28646e+07	1.68437e+06	1.71095e+06	1.16154e+07	21454.4	0	1.6742e+06	1.25842e+06	525249	1.4692e+06	508457	1.46777e+06	2408.99	2.12118e+06	1.77646e+06	5.19277e+06	17629.3	12814.9	4814.41	7655.4	3464.32	4415.36	421321	247087	242433	44861.6	27885.8	19318.2
Mean	UN Intermediate region	Central America	1.76219e+08	0.175019	6.03819e+07	4.92035e+07	4.80202e+07	674025	509275	0	1.1833e+06	4.22894e+07	1.11784e+07	5.73081e+06	6.54337e+07	269427	6.51643e+07	1.11784e+07	5.39859e+07	237624	5.37483e+07	4.80202e+07	5.7281e+06	5.73081e+06	4.22894e+07	509275	0	5.21882e+06	4.5448e+06	674025	4.63759e+06	1.09322e+06	4.63282e+06	4773.25	4.43956e+06	6.73884e+06	1.74163e+07	47151.2	34317.7	12833.5	26903.7	11797.9	15105.8	1.38022e+06	732015	648203	57183.5	25431.7	31751.8
Min	UN Intermediate region	Central America	1.76219e+08	0.175019	5.8019e+07	4.70268e+07	4.57857e+07	627584	501830	0	1.13094e+06	4.02228e+07	1.05052e+07	5.3022e+06	6.2645e+07	257962	6.23786e+07	1.05052e+07	5.12465e+07	218888	5.10114e+07	4.57857e+07	4.94622e+06	5.3022e+06	4.02228e+07	501830	0	4.44094e+06	3.78173e+06	627584	4.16224e+06	784226	4.15794e+06	3400.71	4.0109e+06	6.16164e+06	1.66357e+07	45181.2	32868.7	12285.5	24028.4	10525.2	13496.6	1.14067e+06	585759	499583	33536.4	13744.9	16935
Lower quartile	UN Intermediate region	Central America	1.76219e+08	0.175019	5.9891e+07	4.87778e+07	4.75921e+07	659539	503575	0	1.16787e+06	4.18685e+07	1.10308e+07	5.64807e+06	6.49214e+07	267082	6.46526e+07	1.10308e+07	5.35106e+07	233459	5.32754e+07	4.75921e+07	5.55416e+06	5.64807e+06	4.18685e+07	503575	0	5.04571e+06	4.37255e+06	659539	4.53699e+06	1.01305e+06	4.53251e+06	4407.25	4.3494e+06	6.6284e+06	1.72504e+07	46730.5	34010.1	12718.6	26318.6	11533	14772.8	1.31781e+06	690002	610704	50361.8	22134	27764.6
Median	UN Intermediate region	Central America	1.76219e+08	0.175019	6.03854e+07	4.9193e+07	4.80067e+07	670898	506782	0	1.18022e+06	4.22831e+07	1.11702e+07	5.72586e+06	6.54293e+07	269359	6.51583e+07	1.11702e+07	5.39794e+07	237364	5.37422e+07	4.80067e+07	5.71197e+06	5.72586e+06	4.22831e+07	506782	0	5.20291e+06	4.53079e+06	670898	4.64181e+06	1.08526e+06	4.63717e+06	4727.52	4.43751e+06	6.73819e+06	1.7406e+07	47135.9	34305.9	12830.2	26866.7	11778.4	15077.3	1.37187e+06	725751	641435	56998	25272.7	31615.4
Upper quartile	UN Intermediate region	Central America	1.76219e+08	0.175019	6.08571e+07	4.96506e+07	4.84614e+07	685631	512071	0	1.19564e+06	4.27185e+07	1.13198e+07	5.81228e+06	6.59359e+07	271807	6.56646e+07	1.13198e+07	5.44487e+07	241535	5.4211e+07	4.84614e+07	5.87865e+06	5.81228e+06	4.27185e+07	512071	0	5.36936e+06	4.69558e+06	685631	4.73991e+06	1.16337e+06	4.73518e+06	5084.7	4.52737e+06	6.84559e+06	1.75771e+07	47572.6	34622.3	12948.5	27469.1	12044.6	15425.1	1.43349e+06	765705	677904	63879.4	28563.1	35480.5
Max	UN Intermediate region	Central America	1.76219e+08	0.175019	6.28229e+07	5.14168e+07	5.02721e+07	755993	554660	0	1.29283e+06	4.46117e+07	1.19027e+07	6.21831e+06	6.81805e+07	282036	6.79025e+07	1.19027e+07	5.64542e+07	265185	5.62007e+07	5.02721e+07	6.75593e+06	6.21831e+06	4.46117e+07	554660	0	6.24097e+06	5.56401e+06	755993	5.11863e+06	1.58368e+06	5.11314e+06	7017.11	4.8697e+06	7.3831e+06	1.83806e+07	49562.9	36038.8	13524.1	31263	13846.2	17416.8	1.81001e+06	1.09243e+06	944126	85022.8	40188.1	48912.1
Mean	UN Intermediate region	Channel Islands	170482	0.0885702	78855.1	78855.1	64401.7	14448	5.33826	0	14453.4	64401.7	0	0	79065.1	56.3623	79008.7	0	79008.7	64.8465	78943.9	64401.7	14542.1	0	64401.7	5.33826	0	14536.8	88.7773	14448	0	0	0	0	0	0	121.209	9.86001	7.17608	2.68394	7.85156	4.84398	3.00758	2.04678	1.08517	0.961615	1226.69	757.262	469.424
Min	UN Intermediate region	Channel Islands	170482	0.0885702	49486.7	49486.7	37451.5	2414.31	0	0	2414.48	37451.5	0	0	49609.3	31.1694	49576	0	49576	25.3781	49538.1	37451.5	2472.65	0	37451.5	0	0	2472.48	38.5646	2414.31	0	0	0	0	0	0	61.4815	5.24501	3.75361	1.43151	2.67803	1.60865	1.05965	0.679153	0.294107	0.247276	182.732	120.357	62.3745
Lower quartile	UN Intermediate region	Channel Islands	170482	0.0885702	70434.1	70434.1	56680.7	10650.5	0	0	10656.8	56680.7	0	0	70627.5	47.9938	70586.8	0	70586.8	51.4729	70532.8	56680.7	10749.6	0	56680.7	0	0	10740.8	76.2091	10650.5	0	0	0	0	0	0	101.296	8.37173	6.089	2.2729	5.86044	3.6237	2.21156	1.63189	0.784455	0.683701	891.315	547.863	334.503
Median	UN Intermediate region	Channel Islands	170482	0.0885702	76996.6	76996.6	63169.4	13607.6	0	0	13612.8	63169.4	0	0	77209.3	54.4502	77150.9	0	77150.9	61.2934	77086.4	63169.4	13708.1	0	63169.4	0	0	13696.9	88.5057	13607.6	0	0	0	0	0	0	116.288	9.5149	6.92473	2.592	7.22418	4.45231	2.73935	1.99204	1.01328	0.901368	1150.77	704.769	435.401
Upper quartile	UN Intermediate region	Channel Islands	170482	0.0885702	86322.2	86322.2	70814.4	17372.5	0	0	17388.6	70814.4	0	0	86539	63.1453	86483.2	0	86483.2	73.9929	86417	70814.4	17481.3	0	70814.4	0	0	17474.8	101.219	17372.5	0	0	0	0	0	0	135.575	11.0604	8.05509	3.02168	9.09327	5.61669	3.4938	2.41193	1.31355	1.18017	1483.23	919.031	564.552
Max	UN Intermediate region	Channel Islands	170482	0.0885702	118356	118356	103148	39879.3	368.527	0	39879.3	103148	0	0	118594	116.304	118500	0	118500	180.147	118444	103148	39947.5	0	103148	368.527	0	39947.5	139.15	39879.3	0	0	0	0	0	0	274.256	21.7003	16.0265	5.67453	39.7028	24.2606	15.4422	3.99726	3.10924	2.71797	3685.95	2558.4	1692.78
Mean	UN Intermediate region	Eastern Africa	4.49173e+08	0.279295	7.18796e+07	2.7782e+07	2.74985e+07	36638.6	64794.5	182097	283530	1.04715e+06	4.40976e+07	2.64513e+07	7.9088e+07	1.27649e+06	7.78115e+07	4.40976e+07	3.37139e+07	484638	3.32292e+07	2.74985e+07	5.73079e+06	2.64513e+07	1.04715e+06	64794.5	182097	5.4839e+06	5.44726e+06	36638.6	2.1396e+07	5.05533e+06	2.1374e+07	21951.6	3.03902e+07	1.37074e+07	7.231e+07	223369	162575	60793.8	42274.5	17967.1	24307.4	1.65568e+06	877520	778160	3104.75	1849.42	1255.33
Min	UN Intermediate region	Eastern Africa	4.49173e+08	0.279295	6.8805e+07	2.61875e+07	2.59106e+07	143.578	61516.6	182097	244438	825997	4.1715e+07	2.4845e+07	7.56672e+07	1.21759e+06	7.44412e+07	4.1715e+07	3.20382e+07	437013	3.15887e+07	2.59106e+07	5.03759e+06	2.4845e+07	825997	61516.6	182097	4.78889e+06	4.78093e+06	143.578	1.98354e+07	4.21562e+06	1.98138e+07	18354	2.8338e+07	1.22225e+07	6.91632e+07	212471	154588	57711.8	35104.2	15141.5	19677.1	1.42204e+06	718588	639932	11.7699	5.09528	6.67464
Lower quartile	UN Intermediate region	Eastern Africa	4.49173e+08	0.279295	7.13432e+07	2.74578e+07	2.71743e+07	17780.4	64095.4	182097	264852	993429	4.36742e+07	2.61328e+07	7.85157e+07	1.26461e+06	7.72479e+07	4.36742e+07	3.33584e+07	473162	3.2878e+07	2.71743e+07	5.58288e+06	2.61328e+07	993429	64095.4	182097	5.33608e+06	5.30098e+06	17780.4	2.10893e+07	4.8651e+06	2.10681e+07	21054.6	2.99794e+07	1.33895e+07	7.17608e+07	221242	161032	60212.1	40994.2	17360.4	23543.3	1.60228e+06	840996	743790	1489.3	853.795	618.227
Median	UN Intermediate region	Eastern Africa	4.49173e+08	0.279295	7.18827e+07	2.77741e+07	2.74861e+07	32561.8	64762.5	182097	279480	1.04084e+06	4.40935e+07	2.64347e+07	7.90905e+07	1.27608e+06	7.78144e+07	4.40935e+07	3.37059e+07	484434	3.32192e+07	2.74861e+07	5.72234e+06	2.64347e+07	1.04084e+06	64762.5	182097	5.47568e+06	5.44052e+06	32561.8	2.13871e+07	5.04712e+06	2.13654e+07	21877.3	3.03847e+07	1.37085e+07	7.2309e+07	223288	162526	60774.4	42206	17920.8	24253.6	1.65082e+06	873180	774704	2738.15	1606.34	1085.01
Upper quartile	UN Intermediate region	Eastern Africa	4.49173e+08	0.279295	7.24103e+07	2.80817e+07	2.78015e+07	51096.9	65458.6	182097	297865	1.09686e+06	4.45251e+07	2.67549e+07	7.96453e+07	1.28854e+06	7.83616e+07	4.45251e+07	3.40605e+07	495569	3.35702e+07	2.78015e+07	5.86827e+06	2.67549e+07	1.09686e+06	65458.6	182097	5.62147e+06	5.58443e+06	51096.9	2.16969e+07	5.23636e+06	2.16744e+07	22796.4	3.07824e+07	1.40188e+07	7.28477e+07	225475	164109	61372.9	43477.3	18521.1	25018	1.70547e+06	909700	808963	4323.54	2576.93	1737.5
Max	UN Intermediate region	Eastern Africa	4.49173e+08	0.279295	7.45967e+07	2.96846e+07	2.94045e+07	149427	68690.3	182097	397971	1.40833e+06	4.62402e+07	2.83965e+07	8.22535e+07	1.34233e+06	8.09185e+07	4.62402e+07	3.59376e+07	556833	3.54158e+07	2.94045e+07	6.65442e+06	2.83965e+07	1.40833e+06	68690.3	182097	6.40823e+06	6.36181e+06	149427	2.33115e+07	6.19106e+06	2.3287e+07	27339.9	3.26461e+07	1.53515e+07	7.48663e+07	235389	171356	64033	53119.6	22393.7	30725.9	2.03306e+06	1.17549e+06	1.00453e+06	13689.9	8285.36	6403.2
Mean	UN Intermediate region	Middle Africa	1.84574e+08	0.273375	3.57602e+07	1.42877e+07	1.42848e+07	1977.54	941.252	0	2918.8	1.22041e+06	2.14725e+07	1.30644e+07	3.95444e+07	510846	3.90335e+07	2.14725e+07	1.7561e+07	186802	1.73742e+07	1.42848e+07	3.08947e+06	1.30644e+07	1.22041e+06	941.252	0	3.08853e+06	3.08655e+06	1977.54	1.05684e+07	2.49595e+06	1.05575e+07	10886.2	1.29031e+07	8.56936e+06	3.52345e+07	89388.6	65055.8	24332.8	16628.6	7041.08	9587.54	938611	498096	440515	168.633	74.8877	93.7458
Min	UN Intermediate region	Middle Africa	1.84574e+08	0.273375	3.26483e+07	1.06119e+07	1.06117e+07	0	0	0	0.0237768	704514	1.7718e+07	9.48895e+06	3.65719e+07	434071	3.60943e+07	1.7718e+07	1.39814e+07	138811	1.38213e+07	1.06117e+07	2.24317e+06	9.48895e+06	704514	0	0	2.24169e+06	2.24134e+06	0	7.71713e+06	1.56957e+06	7.70947e+06	6812.57	1.04728e+07	6.18159e+06	3.21804e+07	75956.7	55237.9	20718.8	11619.3	4827.8	6791.53	663698	317969	293707	0	0	0
Lower quartile	UN Intermediate region	Middle Africa	1.84574e+08	0.273375	3.51927e+07	1.34946e+07	1.349e+07	161.39	0	0	384.053	1.11428e+06	2.067e+07	1.23002e+07	3.89155e+07	493278	3.84134e+07	2.067e+07	1.6717e+07	174979	1.65398e+07	1.349e+07	2.8716e+06	1.23002e+07	1.11428e+06	0	0	2.87048e+06	2.86846e+06	161.39	9.88709e+06	2.22228e+06	9.8771e+06	9661.82	1.23661e+07	8.07009e+06	3.46645e+07	86257.8	62778.6	23467.2	15247	6425.1	8776.84	858329	445888	392330	13.4649	5.94418	7.43247
Median	UN Intermediate region	Middle Africa	1.84574e+08	0.273375	3.57579e+07	1.42492e+07	1.42461e+07	736.232	0	0	1465.49	1.23233e+06	2.14956e+07	1.30279e+07	3.95265e+07	510040	3.90246e+07	2.14956e+07	1.75304e+07	185063	1.73478e+07	1.42461e+07	3.05395e+06	1.30279e+07	1.23233e+06	0	0	3.05319e+06	3.05069e+06	736.232	1.05147e+07	2.44959e+06	1.05038e+07	10607.1	1.29016e+07	8.56012e+06	3.5234e+07	89206.6	64912.1	24289.4	16332.5	6909.93	9406.83	923174	486023	429509	63.0944	27.568	34.6666
Upper quartile	UN Intermediate region	Middle Africa	1.84574e+08	0.273375	3.63392e+07	1.50474e+07	1.50456e+07	2134.96	965.715	0	4009.17	1.32915e+06	2.22917e+07	1.38027e+07	4.01747e+07	527535	3.96593e+07	2.22917e+07	1.83528e+07	196516	1.8163e+07	1.50456e+07	3.2752e+06	1.38027e+07	1.32915e+06	965.715	0	3.27469e+06	3.27257e+06	2134.96	1.11934e+07	2.71598e+06	1.11808e+07	11873.5	1.3418e+07	9.05614e+06	3.57916e+07	92331.2	67194.9	25139.3	17629.2	7480.16	10193.8	1.00371e+06	535009	477435	181.437	79.7194	99.4334
Max	UN Intermediate region	Middle Africa	1.84574e+08	0.273375	3.85311e+07	1.80959e+07	1.80953e+07	27545.9	22400.9	0	31157.7	1.80424e+06	2.63528e+07	1.68875e+07	4.30374e+07	589757	4.24648e+07	2.63528e+07	2.18195e+07	261865	2.15741e+07	1.80953e+07	4.60856e+06	1.68875e+07	1.80424e+06	22400.9	0	4.60627e+06	4.60019e+06	27545.9	1.37613e+07	4.48366e+06	1.3745e+07	19233.1	1.61387e+07	1.1589e+07	3.80074e+07	104151	76057	28427.1	32193.5	15491.4	17340	1.62571e+06	957338	887197	2541.12	1171.41	1391.74
Mean	UN Intermediate region	NA	6.07383e+09	0.19324	1.72013e+09	1.519e+09	1.139e+09	1.49042e+08	2.64011e+07	2.04555e+08	3.79998e+08	6.5097e+08	2.01137e+08	4.88029e+08	1.86293e+09	6.64483e+06	1.85629e+09	2.01137e+08	1.65515e+09	6.65367e+06	1.6485e+09	1.139e+09	5.09499e+08	4.88029e+08	6.5097e+08	2.64011e+07	2.04555e+08	2.78543e+08	1.29501e+08	1.49042e+08	3.94806e+08	9.32232e+07	3.94401e+08	405313	1.02653e+08	9.8484e+07	7.02465e+08	1.16288e+06	846386	316496	737718	324372	413346	3.91978e+07	2.07707e+07	1.84271e+07	1.26672e+07	7.79673e+06	4.87045e+06
Min	UN Intermediate region	NA	6.07383e+09	0.19324	1.69132e+09	1.49108e+09	1.1152e+09	1.39488e+08	2.24158e+07	1.91175e+08	3.61914e+08	6.33404e+08	1.92469e+08	4.75915e+08	1.83237e+09	6.51378e+06	1.82581e+09	1.92469e+08	1.62658e+09	6.41665e+06	1.61998e+09	1.1152e+09	4.9083e+08	4.75915e+08	6.33404e+08	2.24158e+07	1.91175e+08	2.6614e+08	1.23263e+08	1.39488e+08	3.83875e+08	8.66534e+07	3.83476e+08	372851	9.65981e+07	9.30979e+07	6.88964e+08	1.13924e+06	829129	310108	708336	311304	395738	3.68526e+07	1.9281e+07	1.69252e+07	1.18305e+07	7.28824e+06	4.48979e+06
Lower quartile	UN Intermediate region	NA	6.07383e+09	0.19324	1.71432e+09	1.51317e+09	1.13441e+09	1.47083e+08	2.54659e+07	2.01674e+08	3.76343e+08	6.46925e+08	1.9963e+08	4.85857e+08	1.85681e+09	6.61897e+06	1.85018e+09	1.9963e+08	1.64914e+09	6.61333e+06	1.64247e+09	1.13441e+09	5.05663e+08	4.85857e+08	6.46925e+08	2.54659e+07	2.01674e+08	2.76105e+08	1.2808e+08	1.47083e+08	3.92673e+08	9.18035e+07	3.92269e+08	399049	1.01457e+08	9.7389e+07	7.00066e+08	1.15831e+06	843087	315235	731938	321712	409893	3.86854e+07	2.04337e+07	1.81089e+07	1.2485e+07	7.68132e+06	4.79226e+06
Median	UN Intermediate region	NA	6.07383e+09	0.19324	1.72014e+09	1.51886e+09	1.139e+09	1.4898e+08	2.63329e+07	2.04605e+08	3.79985e+08	6.50897e+08	2.01101e+08	4.87994e+08	1.863e+09	6.64366e+06	1.85635e+09	2.01101e+08	1.65514e+09	6.65196e+06	1.64849e+09	1.139e+09	5.09404e+08	4.87994e+08	6.50897e+08	2.63329e+07	2.04605e+08	2.78454e+08	1.29423e+08	1.4898e+08	3.9478e+08	9.32317e+07	3.9438e+08	405271	1.0266e+08	9.84836e+07	7.0248e+08	1.16266e+06	846261	316464	737590	324318	413260	3.91771e+07	2.07561e+07	1.84099e+07	1.2662e+07	7.79462e+06	4.86532e+06
Upper quartile	UN Intermediate region	NA	6.07383e+09	0.19324	1.72599e+09	1.52468e+09	1.1436e+09	1.50938e+08	2.72506e+07	2.07315e+08	3.83602e+08	6.5496e+08	2.02636e+08	4.90221e+08	1.86898e+09	6.66987e+06	1.86233e+09	2.02636e+08	1.66108e+09	6.69377e+06	1.6544e+09	1.1436e+09	5.13402e+08	4.90221e+08	6.5496e+08	2.72506e+07	2.07315e+08	2.80904e+08	1.30883e+08	1.50938e+08	3.96961e+08	9.45294e+07	3.96558e+08	411180	1.03817e+08	9.95566e+07	7.04822e+08	1.16741e+06	849673	317730	743383	326913	416796	3.96929e+07	2.10823e+07	1.87209e+07	1.28407e+07	7.90663e+06	4.94427e+06
Max	UN Intermediate region	NA	6.07383e+09	0.19324	1.75327e+09	1.5498e+09	1.16499e+09	1.60108e+08	3.30335e+07	2.19662e+08	3.98246e+08	6.71695e+08	2.09728e+08	5.02469e+08	1.89846e+09	6.79971e+06	1.89174e+09	2.09728e+08	1.68536e+09	6.89409e+06	1.67858e+09	1.16499e+09	5.29562e+08	5.02469e+08	6.71695e+08	3.30335e+07	2.19662e+08	2.92875e+08	1.37814e+08	1.60108e+08	4.08044e+08	1.01193e+08	4.07638e+08	449132	1.09707e+08	1.04707e+08	7.15666e+08	1.18901e+06	865488	323524	776878	343830	433048	4.27718e+07	2.29931e+07	2.09595e+07	1.3608e+07	8.36765e+06	5.32129e+06
Mean	UN Intermediate region	South America	4.31195e+08	0.214821	1.46468e+08	1.26864e+08	1.24147e+08	2.37849e+06	338493	0	2.71698e+06	9.78976e+07	1.96043e+07	2.62491e+07	1.58971e+08	438329	1.58533e+08	1.96043e+07	1.38928e+08	433741	1.38495e+08	1.24147e+08	1.43479e+07	2.62491e+07	9.78976e+07	338493	0	1.40094e+07	1.16309e+07	2.37849e+06	2.12325e+07	5.01662e+06	2.12107e+07	21813.5	6.45669e+06	1.31476e+07	4.67255e+07	76709.9	55831.8	20878.1	50582.2	22533.1	28049.1	3.5292e+06	1.87078e+06	1.65843e+06	202272	105245	97027.3
Min	UN Intermediate region	South America	4.31195e+08	0.214821	1.42347e+08	1.22867e+08	1.2019e+08	1.74993e+06	268675	0	2.08457e+06	9.42392e+07	1.83769e+07	2.48538e+07	1.54369e+08	422598	1.53944e+08	1.83769e+07	1.34839e+08	400928	1.34413e+08	1.2019e+08	1.22784e+07	2.48538e+07	9.42392e+07	268675	0	1.19679e+07	9.90353e+06	1.74993e+06	1.98781e+07	4.18606e+06	1.98575e+07	18124.6	5.94287e+06	1.24022e+07	4.48038e+07	73846.7	53758.3	20088.5	46395.7	20634.3	25761.4	2.94106e+06	1.51533e+06	1.32942e+06	138857	70472	68385.3
Lower quartile	UN Intermediate region	South America	4.31195e+08	0.214821	1.45686e+08	1.26118e+08	1.2341e+08	2.21821e+06	307515	0	2.55335e+06	9.72307e+07	1.93427e+07	2.59622e+07	1.58098e+08	435399	1.57657e+08	1.93427e+07	1.38066e+08	427929	1.37639e+08	1.2341e+08	1.39409e+07	2.59622e+07	9.72307e+07	307515	0	1.36023e+07	1.12508e+07	2.21821e+06	2.0927e+07	4.81288e+06	2.09053e+07	20902.7	6.33637e+06	1.29709e+07	4.63592e+07	76185.1	55449.9	20734.2	49677	22128.2	27545.5	3.38905e+06	1.77712e+06	1.57421e+06	187343	97202.9	89769.7
Median	UN Intermediate region	South America	4.31195e+08	0.214821	1.46481e+08	1.26867e+08	1.2416e+08	2.36075e+06	323297	0	2.69983e+06	9.7885e+07	1.95967e+07	2.62385e+07	1.58946e+08	438258	1.58506e+08	1.95967e+07	1.38918e+08	433286	1.38485e+08	1.2416e+08	1.43131e+07	2.62385e+07	9.7885e+07	323297	0	1.39788e+07	1.15971e+07	2.36075e+06	2.12264e+07	5.00332e+06	2.12042e+07	21729.2	6.4536e+06	1.31411e+07	4.67173e+07	76706.3	55831.2	20875.2	50513.6	22500.9	28009.2	3.51165e+06	1.8573e+06	1.64412e+06	200828	104590	96206.5
Upper quartile	UN Intermediate region	South America	4.31195e+08	0.214821	1.47222e+08	1.27583e+08	1.24866e+08	2.51408e+06	348304	0	2.85589e+06	9.85714e+07	1.98565e+07	2.65418e+07	1.59814e+08	441188	1.59375e+08	1.98565e+07	1.39742e+08	439091	1.39308e+08	1.24866e+08	1.47294e+07	2.65418e+07	9.85714e+07	348304	0	1.4386e+07	1.19807e+07	2.51408e+06	2.15305e+07	5.20116e+06	2.15084e+07	22672.1	6.57223e+06	1.3316e+07	4.709e+07	77227.1	56206.1	21017.7	51401	22895.2	28507.3	3.65333e+06	1.94893e+06	1.7264e+06	215114	112532	103278
Max	UN Intermediate region	South America	4.31195e+08	0.214821	1.50672e+08	1.30971e+08	1.28266e+08	3.15891e+06	623005	0	3.6277e+06	1.01572e+08	2.11046e+07	2.78159e+07	1.6377e+08	453524	1.63326e+08	2.11046e+07	1.43822e+08	468782	1.43372e+08	1.28266e+08	1.69852e+07	2.78159e+07	1.01572e+08	623005	0	1.66727e+07	1.43337e+07	3.15891e+06	2.27902e+07	6.16231e+06	2.27674e+07	26887.6	7.13836e+06	1.41876e+07	4.86607e+07	79455.6	57839.1	21626.9	55834.5	25019.1	31258.2	4.36307e+06	2.55675e+06	2.30809e+06	295546	151778	144126
Mean	UN Intermediate region	Southern Africa	6.72696e+07	0.218538	2.21833e+07	1.78861e+07	1.75748e+07	125745	185474	0	311218	6.28697e+06	4.29728e+06	1.12879e+07	2.41098e+07	90190.6	2.40196e+07	4.29728e+06	1.97223e+07	60288.9	1.9662e+07	1.75748e+07	2.08719e+06	1.12879e+07	6.28697e+06	185474	0	1.90171e+06	1.77597e+06	125745	9.12025e+06	2.16763e+06	9.11088e+06	9364.71	1.52207e+06	2.77521e+06	1.57356e+07	15782.9	11487.8	4295.05	6992.23	3096.34	3895.89	540044	286289	253755	10721.5	4757.36	5964.1
Min	UN Intermediate region	Southern Africa	6.72696e+07	0.218538	1.95445e+07	1.51933e+07	1.4905e+07	125484	147410	0	272948	5.0303e+06	3.25442e+06	8.76554e+06	2.11189e+07	78712.6	2.10356e+07	3.25442e+06	1.68248e+07	47961.5	1.67725e+07	1.4905e+07	1.43251e+06	8.76554e+06	5.0303e+06	147410	0	1.24161e+06	1.11593e+06	125484	6.54798e+06	890277	6.53934e+06	4104.48	1.06385e+06	2.12587e+06	1.2732e+07	13665.9	9961.32	3704.56	5398.96	2350.04	2983.1	323575	163153	131332	5654.89	2266.92	2830.98
Lower quartile	UN Intermediate region	Southern Africa	6.72696e+07	0.218538	2.15349e+07	1.72315e+07	1.69181e+07	125549	182483	0	308270	6.05176e+06	4.00967e+06	1.06726e+07	2.34435e+07	87685	2.33543e+07	4.00967e+06	1.90557e+07	57187.3	1.89971e+07	1.69181e+07	1.92203e+06	1.06726e+07	6.05176e+06	182483	0	1.73648e+06	1.61056e+06	125549	8.51513e+06	1.7533e+06	8.50519e+06	7446.67	1.39155e+06	2.59397e+06	1.50791e+07	15337.1	11161.3	4173.73	6513.9	2880.4	3629.25	478678	245756	216483	9242.7	4044.06	5097.95
Median	UN Intermediate region	Southern Africa	6.72696e+07	0.218538	2.218e+07	1.78862e+07	1.75726e+07	125676	189032	0	314672	6.29468e+06	4.27345e+06	1.12848e+07	2.40885e+07	90151.1	2.39984e+07	4.27345e+06	1.97061e+07	59920.4	1.96461e+07	1.75726e+07	2.06432e+06	1.12848e+07	6.29468e+06	189032	0	1.87845e+06	1.75271e+06	125676	9.11796e+06	2.10688e+06	9.10928e+06	9061	1.50441e+06	2.75887e+06	1.57476e+07	15773.5	11480.6	4292.82	6931.4	3070.2	3859.11	530329	277749	245826	10760.5	4714.64	5945.73
Upper quartile	UN Intermediate region	Southern Africa	6.72696e+07	0.218538	2.28303e+07	1.85334e+07	1.82182e+07	125869	189255	0	315284	6.52776e+06	4.54167e+06	1.18847e+07	2.47793e+07	92547	2.46888e+07	4.54167e+06	2.03872e+07	63160.2	2.03251e+07	1.82182e+07	2.23332e+06	1.18847e+07	6.52776e+06	189255	0	2.0487e+06	1.92314e+06	125869	9.73237e+06	2.51761e+06	9.72294e+06	10870.1	1.63094e+06	2.92956e+06	1.63815e+07	16196.8	11788.8	4409.57	7405.69	3279.65	4120.88	592068	318909	282992	12213.1	5455.2	6825.86
Max	UN Intermediate region	Southern Africa	6.72696e+07	0.218538	2.54413e+07	2.06942e+07	2.03877e+07	127212	231582	0	357588	7.34569e+06	5.98913e+06	1.39424e+07	2.71279e+07	105712	2.70299e+07	5.98913e+06	2.2742e+07	81582.9	2.26734e+07	2.03877e+07	3.08964e+06	1.39424e+07	7.34569e+06	231582	0	2.92736e+06	2.80177e+06	127212	1.17806e+07	4.38875e+06	1.1768e+07	19098.3	2.39279e+06	3.78508e+06	1.86629e+07	18490.1	13469	5021.1	10576.2	4679.27	5896.92	932208	613241	526475	15958.2	8092.85	10016.7
Mean	UN Intermediate region	Western Africa	4.07987e+08	0.188295	7.732e+07	3.27535e+07	3.2692e+07	13.2842	61555.4	0	61568.7	884865	4.45665e+07	3.18071e+07	8.61448e+07	919287	8.52256e+07	4.45665e+07	4.0659e+07	358815	4.03002e+07	3.2692e+07	7.60825e+06	3.18071e+07	884865	61555.4	0	7.5467e+06	7.54669e+06	13.2842	2.57289e+07	6.07825e+06	2.57025e+07	26402.3	2.72704e+07	1.72961e+07	7.76517e+07	160867	117086	43781.7	37838.7	15541.6	22297.1	2.29091e+06	1.21336e+06	1.07754e+06	1.13315	0.502951	0.630199
Min	UN Intermediate region	Western Africa	4.07987e+08	0.188295	7.47542e+07	3.14294e+07	3.13735e+07	0	54355.5	0	54357.4	874141	4.28305e+07	3.04929e+07	8.35792e+07	878805	8.2674e+07	4.28305e+07	3.87382e+07	322108	3.83888e+07	3.13735e+07	6.70836e+06	3.04929e+07	874141	54355.5	0	6.64554e+06	6.64554e+06	0	2.38469e+07	5.05822e+06	2.38229e+07	22088	2.49739e+07	1.52751e+07	7.50587e+07	152984	111320	41663.7	33229.8	13640.4	19293	1.969e+06	1.02888e+06	906363	0	0	0
Lower quartile	UN Intermediate region	Western Africa	4.07987e+08	0.188295	7.68538e+07	3.24815e+07	3.24212e+07	0.216692	58010.7	0	58024.4	882290	4.42324e+07	3.15354e+07	8.56353e+07	911134	8.47229e+07	4.42324e+07	4.03126e+07	351895	3.99571e+07	3.24212e+07	7.38143e+06	3.15354e+07	882290	58010.7	0	7.31935e+06	7.31934e+06	0.216692	2.54288e+07	5.85371e+06	2.54032e+07	25407.5	2.6818e+07	1.68623e+07	7.71767e+07	159416	116024	43374.5	36539.6	15058.9	21437.7	2.21334e+06	1.16421e+06	1.02908e+06	0.0177163	0.00795421	0.00989453
Median	UN Intermediate region	Western Africa	4.07987e+08	0.188295	7.73201e+07	3.27509e+07	3.26894e+07	2.17438	60569.7	0	60581.8	884622	4.4563e+07	3.1805e+07	8.61285e+07	919100	8.52093e+07	4.4563e+07	4.06367e+07	358561	4.02812e+07	3.26894e+07	7.58122e+06	3.1805e+07	884622	60569.7	0	7.51812e+06	7.5181e+06	2.17438	2.57282e+07	6.05901e+06	2.57017e+07	26287.3	2.72748e+07	1.73054e+07	7.76508e+07	160794	117032	43762.8	37690.7	15496.7	22162.1	2.27815e+06	1.2041e+06	1.06724e+06	0.184801	0.0814512	0.103164
Upper quartile	UN Intermediate region	Western Africa	4.07987e+08	0.188295	7.77693e+07	3.30128e+07	3.29521e+07	13.5825	64081.3	0	64097.2	887162	4.49002e+07	3.20675e+07	8.66534e+07	927173	8.57283e+07	4.49002e+07	4.09939e+07	365238	4.06328e+07	3.29521e+07	7.80368e+06	3.20675e+07	887162	64081.3	0	7.74305e+06	7.74302e+06	13.5825	2.60252e+07	6.28002e+06	2.59989e+07	27271.9	2.77145e+07	1.77265e+07	7.8109e+07	162326	118151	44173.6	38982.9	15971.9	23031	2.35436e+06	1.2534e+06	1.11608e+06	1.10035	0.490887	0.617356
Max	UN Intermediate region	Western Africa	4.07987e+08	0.188295	7.9723e+07	3.42614e+07	3.41972e+07	242.505	91627.7	0	91684.5	896936	4.64879e+07	3.3313e+07	8.88255e+07	966780	8.78587e+07	4.64879e+07	4.22993e+07	398889	4.19333e+07	3.41972e+07	9.28005e+06	3.3313e+07	896936	91627.7	0	9.2222e+06	9.2222e+06	242.505	2.71841e+07	7.3139e+06	2.71587e+07	33571	2.95254e+07	1.91986e+07	8.00907e+07	169732	123688	46101.7	47655.5	19627.7	28326.4	3.00218e+06	1.59474e+06	1.63616e+06	25.0477	13.62	13.318
Mean	OECD region	Canada	3.75117e+07	0.23799	1.6905e+07	1.6905e+07	8.69994e+06	5.1238e+06	190444	2.89078e+06	8.20502e+06	8.69994e+06	0	0	1.69416e+07	11482.2	1.69301e+07	0	1.69301e+07	8892.41	1.69212e+07	8.69994e+06	8.22129e+06	0	8.69994e+06	190444	2.89078e+06	5.14006e+06	16263.5	5.1238e+06	0	0	0	0	0	0	20374.6	2009.09	1462.24	546.849	1005.83	620.474	385.357	374.289	198.54	175.749	435433	268624	166808
Min	OECD region	Canada	3.75117e+07	0.23799	1.4946e+07	1.4946e+07	5.89421e+06	3.90784e+06	51704.9	1.08669e+06	5.94205e+06	5.89421e+06	0	0	1.49814e+07	9481.3	1.49707e+07	0	1.49707e+07	7222.26	1.49623e+07	5.89421e+06	5.95918e+06	0	5.89421e+06	51704.9	1.08669e+06	3.92299e+06	12192.4	3.90784e+06	0	0	0	0	0	0	17317.5	1639.94	1194.94	445.008	785.515	478.605	302.714	242.682	119.892	98.667	330238	202000	122129
Lower quartile	OECD region	Canada	3.75117e+07	0.23799	1.63608e+07	1.63608e+07	8.20042e+06	4.86818e+06	129578	2.46582e+06	7.68727e+06	8.20042e+06	0	0	1.63967e+07	11112.2	1.63856e+07	0	1.63856e+07	8497.23	1.63771e+07	8.20042e+06	7.70317e+06	0	8.20042e+06	129578	2.46582e+06	4.8847e+06	15365.2	4.86818e+06	0	0	0	0	0	0	19651.2	1942.66	1413.8	528.917	954.986	587.632	364.538	345.115	177.55	155.582	411332	253129	156490
Median	OECD region	Canada	3.75117e+07	0.23799	1.68481e+07	1.68481e+07	8.66989e+06	5.11092e+06	177835	2.82843e+06	8.15269e+06	8.66989e+06	0	0	1.68841e+07	11459.3	1.68731e+07	0	1.68731e+07	8858.25	1.68645e+07	8.66989e+06	8.16876e+06	0	8.66989e+06	177835	2.82843e+06	5.12685e+06	16261.7	5.11092e+06	0	0	0	0	0	0	20329.9	2005.73	1460.03	545.794	1001.16	617.304	383.343	372.709	195.654	173.334	434037	267717	166050
Upper quartile	OECD region	Canada	3.75117e+07	0.23799	1.73855e+07	1.73855e+07	9.18721e+06	5.36976e+06	237415	3.24505e+06	8.65829e+06	9.18721e+06	0	0	1.74226e+07	11831.8	1.74107e+07	0	1.74107e+07	9266.46	1.74012e+07	9.18721e+06	8.67466e+06	0	9.18721e+06	237415	3.24505e+06	5.3863e+06	17163.2	5.36976e+06	0	0	0	0	0	0	21048.6	2071.65	1507.97	563.76	1052.46	649.754	404.344	401.351	216.977	193.272	458175	283348	176818
Max	OECD region	Canada	3.75117e+07	0.23799	1.96636e+07	1.96636e+07	1.19646e+07	6.64092e+06	526247	5.69648e+06	1.12474e+07	1.19646e+07	0	0	1.97007e+07	13987.1	1.96887e+07	0	1.96887e+07	11536.5	1.96793e+07	1.19646e+07	1.12657e+07	0	1.19646e+07	526247	5.69648e+06	6.65681e+06	20239.2	6.64092e+06	0	0	0	0	0	0	24812.5	2431.71	1772.46	660.755	1409.35	846.596	582.876	550.025	351.764	290.526	561176	352220	229153
Mean	OECD region	China	1.43115e+09	0.163004	3.06797e+08	2.86337e+08	1.60034e+08	2.04734e+06	3.82154e+06	1.20434e+08	1.26302e+08	1.59192e+08	2.04606e+07	841738	3.5178e+08	1.05365e+06	3.50726e+08	2.04606e+07	3.30265e+08	1.36802e+06	3.28897e+08	1.60034e+08	1.68863e+08	841738	1.59192e+08	3.82154e+06	1.20434e+08	4.46082e+07	4.25609e+07	2.04734e+06	681063	160675	680364	699.111	6.81613e+06	1.36444e+07	2.3724e+07	184409	134221	50187.9	166476	73934.9	92540.6	1.29283e+07	6.85243e+06	6.07592e+06	173261	106710	66551
Min	OECD region	China	1.43115e+09	0.163004	2.90844e+08	2.70302e+08	1.53278e+08	2.04347e+06	2.70185e+06	1.10366e+08	1.16191e+08	1.52437e+08	1.96284e+07	775613	3.35473e+08	1.01553e+06	3.34457e+08	1.96284e+07	3.14261e+08	1.27988e+06	3.12939e+08	1.53278e+08	1.58011e+08	775613	1.52437e+08	2.70185e+06	1.10366e+08	4.04623e+07	3.84187e+07	2.04347e+06	626599	139317	625966	604.77	6.44416e+06	1.30504e+07	2.28866e+07	177113	128954	48158.4	152286	67576.2	84710.2	1.14591e+07	5.92731e+06	5.21792e+06	87952.1	43291.3	13255.6
Lower quartile	OECD region	China	1.43115e+09	0.163004	3.03034e+08	2.826e+08	1.58524e+08	2.04356e+06	3.49466e+06	1.18058e+08	1.23798e+08	1.57687e+08	2.0286e+07	827436	3.47861e+08	1.04577e+06	3.46822e+08	2.0286e+07	3.26446e+08	1.34768e+06	3.25064e+08	1.58524e+08	1.6617e+08	827436	1.57687e+08	3.49466e+06	1.18058e+08	4.36083e+07	4.1561e+07	2.04356e+06	668754	156471	668073	681.016	6.73116e+06	1.35182e+07	2.35369e+07	182957	133158	49782.1	163362	72541.8	90759.7	1.25634e+07	6.61834e+06	5.85447e+06	149390	87894.1	52218.4
Median	OECD region	China	1.43115e+09	0.163004	3.06633e+08	2.86178e+08	1.60009e+08	2.04445e+06	3.77589e+06	1.20418e+08	1.26279e+08	1.59161e+08	2.04538e+07	841086	3.5164e+08	1.05324e+06	3.5059e+08	2.04538e+07	3.30128e+08	1.36693e+06	3.28756e+08	1.60009e+08	1.68792e+08	841086	1.59161e+08	3.77589e+06	1.20418e+08	4.45109e+07	4.2465e+07	2.04445e+06	680476	160466	679769	697.861	6.81121e+06	1.36393e+07	2.37181e+07	184338	134163	50165.5	166289	73860.4	92434.8	1.28907e+07	6.81803e+06	6.0473e+06	173167	105024	65037.4
Upper quartile	OECD region	China	1.43115e+09	0.163004	3.10608e+08	2.9008e+08	1.61507e+08	2.04846e+06	4.09457e+06	1.22795e+08	1.28824e+08	1.60663e+08	2.06261e+07	855667	3.55615e+08	1.06134e+06	3.54555e+08	2.06261e+07	3.34049e+08	1.38656e+06	3.32679e+08	1.61507e+08	1.71506e+08	855667	1.60663e+08	4.09457e+06	1.22795e+08	4.55252e+07	4.34785e+07	2.04846e+06	692372	164554	691663	715.819	6.8951e+06	1.37666e+07	2.38988e+07	185771	135216	50563.6	169336	75177.3	94151.6	1.32473e+07	7.05469e+06	6.26042e+06	196445	124143	78600.3
Max	OECD region	China	1.43115e+09	0.163004	3.24287e+08	3.03802e+08	1.6844e+08	2.09782e+06	5.70875e+06	1.31296e+08	1.37799e+08	1.67601e+08	2.14856e+07	942236	3.7001e+08	1.09772e+06	3.68925e+08	2.14856e+07	3.48441e+08	1.48094e+06	3.4704e+08	1.6844e+08	1.81607e+08	942236	1.67601e+08	5.70875e+06	1.31296e+08	5.08689e+07	4.8814e+07	2.09782e+06	758373	190373	757574	869.265	7.34459e+06	1.43606e+07	2.47575e+07	193633	140966	52667.1	188723	84761	104046	1.49642e+07	8.45365e+06	7.86709e+06	255217	201768	163444
Mean	OECD region	Eurasia	1.63629e+06	0.607424	649958	572110	572110	0	0	0	0	131083	77848.8	441027	697410	2943.11	694467	77848.8	616618	3001.29	613617	572110	41507.5	441027	131083	0	0	41507.5	41507.5	0	356914	84113	356547	366.929	24211.3	53637.5	524820	515.086	374.903	140.183	372.665	165.458	207.207	12618.6	6671.05	5947.53	0	0	0
Min	OECD region	Eurasia	1.63629e+06	0.607424	514081	459615	459615	0	0	0	0	131083	54466.7	328532	552834	2263.5	550422	54466.7	490146	1858.98	487682	459615	21933.2	328532	131083	0	0	21933.2	21933.2	0	249229	38156.3	248926	155.934	14486.7	37129.5	388161	395.35	285.882	108.57	225.391	96.5091	124.136	5780	2680.25	2161.59	0	0	0
Lower quartile	OECD region	Eurasia	1.63629e+06	0.607424	619584	545830	545830	0	0	0	0	131083	73042.2	414747	666631	2790.64	663783	73042.2	589916	2729.2	587015	545830	36083.9	414747	131083	0	0	36083.9	36083.9	0	332782	72364.2	332457	312.978	22221.3	50012.3	494121	487.085	354.283	132.59	332.779	147.2	184.813	10656.1	5377.97	4711.97	0	0	0
Median	OECD region	Eurasia	1.63629e+06	0.607424	649127	571355	571355	0	0	0	0	131083	77577.9	440273	696355	2936.07	693389	77577.9	615677	2982.58	612715	571355	40880.7	440273	131083	0	0	40880.7	40880.7	0	355515	82273.1	355115	358.703	24053.8	53337.5	524061	514.071	374.215	139.824	370.19	164.274	205.535	12277.6	6406.71	5690.05	0	0	0
Upper quartile	OECD region	Eurasia	1.63629e+06	0.607424	679466	597904	597904	0	0	0	0	131083	82271.1	466822	727377	3089.25	724308	82271.1	643219	3253.84	639974	597904	46355.7	466822	131083	0	0	46355.7	46355.7	0	380593	94478.3	380205	412.71	26057.8	56956.8	554506	541.37	394.087	147.393	407.875	181.365	227.077	14253	7696.02	6920.41	0	0	0
Max	OECD region	Eurasia	1.63629e+06	0.607424	818808	717271	717271	0	0	0	0	131083	103304	586188	872244	3740.27	868633	103304	767096	4549.44	762923	717271	74974.2	586188	131083	0	0	74974.2	74974.2	0	478446	151765	477930	771.756	36207.4	76580.1	695508	671.59	488.696	182.894	625.292	268.746	356.547	27236	19117	15360.9	0	0	0
Mean	OECD region	India	1.39645e+09	0.167023	2.41911e+08	1.90283e+08	1.82804e+08	0	7.47899e+06	0	7.47899e+06	4.48721e+06	5.16285e+07	1.78317e+08	2.7949e+08	1.79479e+06	2.77695e+08	5.16285e+07	2.26067e+08	1.71964e+06	2.24347e+08	1.82804e+08	4.15435e+07	1.78317e+08	4.48721e+06	7.47899e+06	0	3.40645e+07	3.40645e+07	0	1.44245e+08	3.40721e+07	1.44096e+08	148071	2.91959e+07	2.24327e+07	2.3346e+08	314089	228603	85485.5	171933	71851.1	100082	1.03479e+07	5.48366e+06	4.86425e+06	0	0	0
Min	OECD region	India	1.39645e+09	0.167023	2.34829e+08	1.8323e+08	1.76019e+08	0	5.71786e+06	0	5.71786e+06	3.64867e+06	4.75426e+07	1.71341e+08	2.71346e+08	1.72419e+06	2.69622e+08	4.75426e+07	2.18784e+08	1.61142e+06	2.17092e+08	1.76019e+08	3.74483e+07	1.71341e+08	3.64867e+06	5.71786e+06	0	3.04771e+07	3.04771e+07	0	1.38021e+08	3.02862e+07	1.3789e+08	130899	2.61959e+07	1.97071e+07	2.26392e+08	301212	219386	81826.5	158453	64253.4	91411.8	9.27811e+06	4.79337e+06	4.21605e+06	0	0	0
Lower quartile	OECD region	India	1.39645e+09	0.167023	2.40432e+08	1.88916e+08	1.8144e+08	0	7.09157e+06	0	7.09157e+06	4.36473e+06	5.07944e+07	1.7695e+08	2.77837e+08	1.7807e+06	2.76047e+08	5.07944e+07	2.2448e+08	1.6972e+06	2.22766e+08	1.8144e+08	4.08128e+07	1.7695e+08	4.36473e+06	7.09157e+06	0	3.34071e+07	3.34071e+07	0	1.42916e+08	3.32596e+07	1.42771e+08	144333	2.85452e+07	2.18262e+07	2.31951e+08	311488	226717	84778.4	168751	70402.7	98186.3	1.01009e+07	5.32562e+06	4.71759e+06	0	0	0
Median	OECD region	India	1.39645e+09	0.167023	2.41895e+08	1.90255e+08	1.82777e+08	0	7.4484e+06	0	7.4484e+06	4.50696e+06	5.16102e+07	1.78288e+08	2.79472e+08	1.79429e+06	2.77677e+08	5.16102e+07	2.26079e+08	1.7188e+06	2.24373e+08	1.82777e+08	4.15222e+07	1.78288e+08	4.50696e+06	7.4484e+06	0	3.40389e+07	3.40389e+07	0	1.44218e+08	3.40498e+07	1.4407e+08	147848	2.91746e+07	2.24306e+07	2.33427e+08	313996	228546	85475.1	171869	71797	100037	1.03347e+07	5.47474e+06	4.84966e+06	0	0	0
Upper quartile	OECD region	India	1.39645e+09	0.167023	2.43392e+08	1.91613e+08	1.84147e+08	0	7.83558e+06	0	7.83558e+06	4.64722e+06	5.24284e+07	1.79644e+08	2.81097e+08	1.80885e+06	2.79295e+08	5.24284e+07	2.27583e+08	1.74147e+06	2.25852e+08	1.84147e+08	4.22777e+07	1.79644e+08	4.64722e+06	7.83558e+06	0	3.47031e+07	3.47031e+07	0	1.45538e+08	3.48321e+07	1.4539e+08	151483	2.98269e+07	2.30076e+07	2.34949e+08	316598	230417	86190.2	174892	73167.1	101868	1.05776e+07	5.62856e+06	4.99852e+06	0	0	0
Max	OECD region	India	1.39645e+09	0.167023	2.49802e+08	1.98188e+08	1.90281e+08	0	9.7742e+06	0	9.7742e+06	4.76415e+06	5.5724e+07	1.86069e+08	2.88066e+08	1.88231e+06	2.86229e+08	5.5724e+07	2.34656e+08	1.8537e+06	2.32918e+08	1.90281e+08	4.57451e+07	1.86069e+08	4.76415e+06	9.7742e+06	0	3.73795e+07	3.73795e+07	0	1.5119e+08	3.89521e+07	1.51041e+08	169714	3.25584e+07	2.60732e+07	2.41089e+08	328024	238553	89486.7	191267	82428.6	111510	1.19207e+07	6.48108e+06	5.90729e+06	0	0	0
Mean	OECD region	Latin America	4.49355e+08	0.203492	1.50934e+08	1.24953e+08	1.23737e+08	872232	344123	0	1.21636e+06	9.08958e+07	2.59805e+07	3.28413e+07	1.63991e+08	584724	1.63406e+08	2.59805e+07	1.37425e+08	497547	1.36928e+08	1.23737e+08	1.31908e+07	3.28413e+07	9.08958e+07	344123	0	1.28466e+07	1.19744e+07	872232	2.65684e+07	6.27292e+06	2.65411e+07	27301.8	1.01811e+07	1.57995e+07	5.99041e+07	102326	74475.7	27850.5	57267	25271.9	31995.1	3.63536e+06	1.92724e+06	1.70812e+06	74213.3	40535.8	33677.5
Min	OECD region	Latin America	4.49355e+08	0.203492	1.46675e+08	1.21285e+08	1.19997e+08	595341	274822	0	911964	8.73597e+07	2.46042e+07	3.1236e+07	1.59365e+08	562727	1.58791e+08	2.46042e+07	1.33268e+08	465718	1.32787e+08	1.19997e+08	1.16683e+07	3.1236e+07	8.73597e+07	274822	0	1.13478e+07	1.05375e+07	595341	2.50322e+07	5.28643e+06	2.50067e+07	22927.6	9.27197e+06	1.47898e+07	5.80179e+07	98649.8	71773.1	26875	53411.8	23488.1	29845.6	3.12212e+06	1.61552e+06	1.39737e+06	50199	27327.5	22210.7
Lower quartile	OECD region	Latin America	4.49355e+08	0.203492	1.50166e+08	1.24217e+08	1.23017e+08	770452	313114	0	1.10614e+06	9.02562e+07	2.56987e+07	3.25276e+07	1.63164e+08	580527	1.62581e+08	2.56987e+07	1.36629e+08	491171	1.36131e+08	1.23017e+08	1.28114e+07	3.25276e+07	9.02562e+07	313114	0	1.24741e+07	1.16126e+07	770452	2.62381e+07	6.05979e+06	2.62114e+07	26327.7	1.00166e+07	1.56067e+07	5.95106e+07	101592	73934.3	27646.2	56322.1	24859.1	31461.6	3.50629e+06	1.84356e+06	1.62896e+06	65188.9	35962.6	28935
Median	OECD region	Latin America	4.49355e+08	0.203492	1.50932e+08	1.24961e+08	1.23739e+08	831712	328884	0	1.17656e+06	9.09027e+07	2.59645e+07	3.28325e+07	1.63971e+08	584688	1.63385e+08	2.59645e+07	1.3741e+08	497214	1.36914e+08	1.23739e+08	1.3151e+07	3.28325e+07	9.09027e+07	328884	0	1.281e+07	1.19429e+07	831712	2.65653e+07	6.2578e+06	2.65374e+07	27242.3	1.01805e+07	1.57943e+07	5.98956e+07	102323	74470.8	27844	57201.3	25246.8	31963.2	3.62116e+06	1.916e+06	1.69757e+06	70862.7	39326.9	31509
Upper quartile	OECD region	Latin America	4.49355e+08	0.203492	1.51689e+08	1.25672e+08	1.24443e+08	940427	353965	0	1.30113e+06	9.15524e+07	2.62557e+07	3.31498e+07	1.64806e+08	588721	1.64213e+08	2.62557e+07	1.38199e+08	503701	1.377e+08	1.24443e+08	1.35412e+07	3.31498e+07	9.15524e+07	353965	0	1.31949e+07	1.23032e+07	940427	2.68984e+07	6.47597e+06	2.68704e+07	28218.5	1.03353e+07	1.59952e+07	6.0287e+07	103051	75006	28046.3	58152.6	25655.2	32493.8	3.75109e+06	1.99924e+06	1.77217e+06	79846.7	43952.9	36182.5
Max	OECD region	Latin America	4.49355e+08	0.203492	1.55224e+08	1.29167e+08	1.27812e+08	1.43996e+06	630808	0	1.82954e+06	9.49909e+07	2.75635e+07	3.45214e+07	1.68852e+08	609938	1.68267e+08	2.75635e+07	1.41985e+08	536120	1.41474e+08	1.27812e+08	1.52163e+07	3.45214e+07	9.49909e+07	630808	0	1.48912e+07	1.40262e+07	1.43996e+06	2.8296e+07	7.49804e+06	2.82667e+07	33190.3	1.10229e+07	1.6968e+07	6.18074e+07	107020	77917.1	29136.9	63045.5	28005.1	35040.4	4.50609e+06	2.61949e+06	2.33737e+06	142240	68064.2	74177.9
Mean	OECD region	Middle East and North Africa	4.6964e+08	0.119506	1.52577e+08	1.33509e+08	1.29385e+08	2.97662e+06	1.14767e+06	0	4.1243e+06	4.52853e+07	1.90671e+07	8.40998e+07	1.65193e+08	478208	1.64715e+08	1.90671e+07	1.45648e+08	601209	1.45046e+08	1.29385e+08	1.56613e+07	8.40998e+07	4.52853e+07	1.14767e+06	0	1.45137e+07	1.1537e+07	2.97662e+06	6.80329e+07	1.6067e+07	6.79629e+07	69965.8	9.06745e+06	9.99968e+06	1.04246e+08	83683.4	60907.9	22775.5	65988.9	28626.3	37362.6	3.49792e+06	1.85352e+06	1.6444e+06	253252	152438	100814
Min	OECD region	Middle East and North Africa	4.6964e+08	0.119506	1.45803e+08	1.26917e+08	1.2197e+08	1.87172e+06	835779	0	2.85243e+06	4.05206e+07	1.66236e+07	7.95084e+07	1.58066e+08	449234	1.57583e+08	1.66236e+07	1.38579e+08	538066	1.37982e+08	1.2197e+08	1.3351e+07	7.95084e+07	4.05206e+07	835779	0	1.23577e+07	9.74186e+06	1.87172e+06	6.30097e+07	1.29574e+07	6.29461e+07	57312	6.94194e+06	7.74799e+06	9.99979e+07	78153.8	56902.8	21251	58049	24986.6	32340.1	2.84271e+06	1.50087e+06	1.29689e+06	134559	78596.2	48580.6
Lower quartile	OECD region	Middle East and North Africa	4.6964e+08	0.119506	1.51155e+08	1.3207e+08	1.27931e+08	2.58795e+06	999268	0	3.71948e+06	4.43901e+07	1.85831e+07	8.30001e+07	1.63705e+08	471435	1.63231e+08	1.85831e+07	1.44168e+08	587904	1.43571e+08	1.27931e+08	1.51142e+07	8.30001e+07	4.43901e+07	999268	0	1.39871e+07	1.11515e+07	2.58795e+06	6.69372e+07	1.53584e+07	6.68684e+07	66707	8.5345e+06	9.48404e+06	1.03163e+08	82470.8	60024.2	22446.3	64137.3	27812.1	36258.6	3.36074e+06	1.7641e+06	1.56001e+06	218183	130279	85971.6
Median	OECD region	Middle East and North Africa	4.6964e+08	0.119506	1.5255e+08	1.33494e+08	1.29363e+08	2.894e+06	1.10388e+06	0	4.05592e+06	4.52916e+07	1.90508e+07	8.40043e+07	1.65183e+08	477915	1.64703e+08	1.90508e+07	1.45618e+08	600699	1.45021e+08	1.29363e+08	1.56163e+07	8.40043e+07	4.52916e+07	1.10388e+06	0	1.44708e+07	1.15136e+07	2.894e+06	6.7993e+07	1.60187e+07	6.79223e+07	69690.6	9.05522e+06	9.9946e+06	1.04172e+08	83634.7	60879.4	22763.8	65911.5	28585.7	37316.2	3.48951e+06	1.84394e+06	1.63678e+06	247124	148959	98301.1
Upper quartile	OECD region	Middle East and North Africa	4.6964e+08	0.119506	1.53933e+08	1.34859e+08	1.30771e+08	3.2884e+06	1.24783e+06	0	4.46951e+06	4.61919e+07	1.95192e+07	8.51305e+07	1.66582e+08	484749	1.66104e+08	1.95192e+07	1.47081e+08	614118	1.46473e+08	1.30771e+08	1.61594e+07	8.51305e+07	4.61919e+07	1.24783e+06	0	1.49931e+07	1.18922e+07	3.2884e+06	6.90691e+07	1.67221e+07	6.89985e+07	72857.4	9.58568e+06	1.05093e+07	1.05284e+08	84852	61766	23096.3	67746.3	29400.5	38396.3	3.62561e+06	1.93581e+06	1.71889e+06	283213	171088	112992
Max	OECD region	Middle East and North Africa	4.6964e+08	0.119506	1.59632e+08	1.40395e+08	1.36241e+08	5.1062e+06	1.97807e+06	0	6.16497e+06	5.11123e+07	2.16905e+07	8.90408e+07	1.7305e+08	512246	1.72555e+08	2.16905e+07	1.5365e+08	668602	1.53037e+08	1.36241e+08	1.87294e+07	8.90408e+07	5.11123e+07	1.97807e+06	0	1.76041e+07	1.35787e+07	5.1062e+06	7.37276e+07	2.12651e+07	7.36433e+07	89677.6	1.1572e+07	1.22458e+07	1.09731e+08	89989.7	65573.9	24538.1	78688.9	34014.4	45516	4.38342e+06	2.45702e+06	2.23036e+06	455381	288004	195555
Mean	OECD region	OECD EU countries	4.14585e+08	0.291603	2.07429e+08	2.07361e+08	1.25242e+08	4.17746e+07	5.60794e+06	3.47368e+07	8.21194e+07	1.25242e+08	68128.2	0	2.07925e+08	163708	2.07761e+08	68128.2	2.07693e+08	167399	2.07526e+08	1.25242e+08	8.2284e+07	0	1.25242e+08	5.60794e+06	3.47368e+07	4.19393e+07	164649	4.17746e+07	0	0	0	0	45002.4	23125.8	399235	28648.9	20851.7	7797.27	20407.9	12592.6	7815.27	3786.44	2006.1	1780.35	3.55163e+06	2.19112e+06	1.36051e+06
Min	OECD region	OECD EU countries	4.14585e+08	0.291603	2.00145e+08	2.0007e+08	1.16614e+08	3.79672e+07	4.43092e+06	3.00843e+07	7.55687e+07	1.16614e+08	38782	0	2.00622e+08	156863	2.00464e+08	38782	2.00389e+08	156680	2.00229e+08	1.16614e+08	7.57384e+07	0	1.16614e+08	4.43092e+06	3.00843e+07	3.8128e+07	152480	3.79672e+07	0	0	0	0	23363.3	11773.8	361690	27386.9	19932.7	7454.19	18769.9	11578.8	7176.76	3389.55	1763.01	1565.95	3.22588e+06	1.99198e+06	1.22369e+06
Lower quartile	OECD region	OECD EU countries	4.14585e+08	0.291603	2.06147e+08	2.06079e+08	1.23831e+08	4.10384e+07	5.36206e+06	3.37756e+07	8.08507e+07	1.23831e+08	60446.1	0	2.0664e+08	162159	2.06477e+08	60446.1	2.06411e+08	165040	2.06245e+08	1.23831e+08	8.10145e+07	0	1.23831e+08	5.36206e+06	3.37756e+07	4.12026e+07	162409	4.10384e+07	0	0	0	0	39639.5	19942.7	390611	28373.3	20651	7722.28	20051.5	12367.9	7669.71	3713.06	1951.78	1730.87	3.48462e+06	2.14927e+06	1.33297e+06
Median	OECD region	OECD EU countries	4.14585e+08	0.291603	2.07473e+08	2.07407e+08	1.25257e+08	4.17591e+07	5.60774e+06	3.47162e+07	8.21141e+07	1.25257e+08	66771.5	0	2.07969e+08	163707	2.07805e+08	66771.5	2.0774e+08	167359	2.07572e+08	1.25257e+08	8.22785e+07	0	1.25257e+08	5.60774e+06	3.47162e+07	4.19238e+07	164698	4.17591e+07	0	0	0	0	44060.5	22544.5	398104	28645.9	20849.6	7797.11	20387.3	12579.1	7806.81	3783.74	2003.62	1778.21	3.54965e+06	2.18944e+06	1.35981e+06
Upper quartile	OECD region	OECD EU countries	4.14585e+08	0.291603	2.08709e+08	2.08636e+08	1.26671e+08	4.25023e+07	5.8462e+06	3.5662e+07	8.33073e+07	1.26671e+08	74366.7	0	2.09206e+08	165184	2.09041e+08	74366.7	2.08972e+08	169631	2.08801e+08	1.26671e+08	8.3472e+07	0	1.26671e+08	5.8462e+06	3.5662e+07	4.26672e+07	166870	4.25023e+07	0	0	0	0	49357.6	25595.6	406494	28909.2	21039.9	7868.87	20747.7	12804.4	7950.9	3856.14	2057.06	1828.09	3.61528e+06	2.23186e+06	1.38721e+06
Max	OECD region	OECD EU countries	4.14585e+08	0.291603	2.13362e+08	2.13291e+08	1.33054e+08	4.55033e+07	7.09225e+06	3.96277e+07	8.98975e+07	1.33054e+08	116191	0	2.13862e+08	172482	2.13694e+08	116191	2.13623e+08	181054	2.13454e+08	1.33054e+08	9.00628e+07	0	1.33054e+08	7.09225e+06	3.96277e+07	4.56648e+07	176337	4.55033e+07	0	0	0	0	85668.5	45165	452737	30231.7	22004.6	8227.07	22661.7	13931.7	8767.13	4222.88	2292.33	2063.25	3.9475e+06	2.43814e+06	1.5204e+06
Mean	OECD region	OECD Non-EU countries	1.74426e+08	0.161869	7.30053e+07	6.95529e+07	4.92444e+07	1.0512e+07	1.92219e+06	7.87432e+06	2.03085e+07	4.83983e+07	3.45234e+06	846179	7.57458e+07	113492	7.56323e+07	3.45234e+06	7.21799e+07	110759	7.20692e+07	4.92444e+07	2.28247e+07	846179	4.83983e+07	1.92219e+06	7.87432e+06	1.30282e+07	2.51624e+06	1.0512e+07	685300	160879	684592	707.852	1.18267e+06	2.26967e+06	4.52277e+06	19866.3	14459	5407.22	13675.5	6446.68	7228.86	752440	398542	353897	892874	548209	344665
Min	OECD region	OECD Non-EU countries	1.74426e+08	0.161869	6.81598e+07	6.49809e+07	4.43476e+07	9.21784e+06	1.34361e+06	6.43908e+06	1.8491e+07	4.34383e+07	2.54311e+06	441180	7.03577e+07	99116.1	7.02563e+07	2.54311e+06	6.70774e+07	85511.6	6.69804e+07	4.43476e+07	2.06679e+07	441180	4.34383e+07	1.34361e+06	6.43908e+06	1.13799e+07	1.55188e+06	9.21784e+06	271345	26114.4	270985	152.461	838986	1.64501e+06	3.50447e+06	17405.1	12653.4	4746.77	10000.6	4786.56	5214.01	378245	189159	176839	776336	466913	288177
Lower quartile	OECD region	OECD Non-EU countries	1.74426e+08	0.161869	7.20602e+07	6.86082e+07	4.83314e+07	1.0268e+07	1.80374e+06	7.58741e+06	1.98998e+07	4.74851e+07	3.22382e+06	754984	7.47767e+07	110776	7.46632e+07	3.22382e+06	7.12201e+07	105510	7.11118e+07	4.83314e+07	2.23275e+07	754984	4.74851e+07	1.80374e+06	7.58741e+06	1.26536e+07	2.23026e+06	1.0268e+07	585666	94481	585004	410.744	1.09e+06	2.11658e+06	4.28022e+06	19371.8	14100.5	5271.47	12876.3	6089.31	6778.79	650314	333015	291406	866527	530097	332286
Median	OECD region	OECD Non-EU countries	1.74426e+08	0.161869	7.30186e+07	6.95535e+07	4.92521e+07	1.04997e+07	1.91771e+06	7.85844e+06	2.02928e+07	4.84127e+07	3.42225e+06	857294	7.57512e+07	113314	7.56377e+07	3.42225e+06	7.21813e+07	110467	7.20709e+07	4.92521e+07	2.27939e+07	857294	4.84127e+07	1.91771e+06	7.85844e+06	1.30008e+07	2.4661e+06	1.04997e+07	687909	141990	687159	612.686	1.17167e+06	2.24676e+06	4.50343e+06	19837	14440.4	5400.13	13609.2	6418.9	7190.13	732931	382633	338532	891578	547768	343558
Upper quartile	OECD region	OECD Non-EU countries	1.74426e+08	0.161869	7.39453e+07	7.04602e+07	5.01626e+07	1.07472e+07	2.0328e+06	8.16006e+06	2.07034e+07	4.93186e+07	3.65586e+06	940534	7.6732e+07	116172	7.66161e+07	3.65586e+06	7.31445e+07	115589	7.30307e+07	5.01626e+07	2.32819e+07	940534	4.93186e+07	2.0328e+06	8.16006e+06	1.33661e+07	2.75517e+06	1.07472e+07	783564	207132	782837	908.692	1.26327e+06	2.40504e+06	4.74742e+06	20339.6	14808.2	5535.69	14411.7	6777.81	7633.75	832844	444547	396807	918403	564831	356840
Max	OECD region	OECD Non-EU countries	1.74426e+08	0.161869	7.81124e+07	7.40443e+07	5.38899e+07	1.18953e+07	2.52853e+06	9.57467e+06	2.26098e+07	5.30289e+07	4.97768e+06	1.36522e+06	8.11183e+07	133472	8.09942e+07	4.97768e+06	7.70499e+07	143121	7.69252e+07	5.38899e+07	2.57958e+07	1.36522e+06	5.30289e+07	2.52853e+06	9.57467e+06	1.5345e+07	4.38295e+06	1.18953e+07	1.21115e+06	594869	1.21006e+06	2970.91	1.83769e+06	3.37743e+06	6.16426e+06	23356.2	17041.8	6383.23	18671.7	8692.74	10030.8	1.50911e+06	1.014e+06	888911	1.05173e+06	642368	429146
Mean	OECD region	OECD Oceania	3.06784e+07	0.475391	1.66925e+07	1.6692e+07	1.19252e+07	4.25754e+06	509282	0	4.76682e+06	1.19251e+07	563.541	20.3301	1.67257e+07	10596.8	1.67151e+07	563.541	1.67145e+07	8352.11	1.67062e+07	1.19252e+07	4.78104e+06	20.3301	1.19251e+07	509282	0	4.27176e+06	14217.5	4.25754e+06	16.4464	3.88377	16.4296	0.0167421	100.472	463.069	19532.8	1854.67	1349.89	504.775	880.859	543.291	337.568	326.59	173.175	153.415	361731	223114	138617
Min	OECD region	OECD Oceania	3.06784e+07	0.475391	1.49529e+07	1.49528e+07	1.03802e+07	3.58292e+06	255062	0	3.99471e+06	1.03802e+07	24.0376	0.0922301	1.49846e+07	9111.02	1.49751e+07	24.0376	1.49749e+07	6927.34	1.4967e+07	1.03802e+07	4.00921e+06	0.0922301	1.03802e+07	255062	0	3.59742e+06	12072.9	3.58292e+06	0.0730303	0.0191998	0.0729684	6.18164e-05	3.66942	20.3682	16883.7	1604.04	1168.06	435.975	720.106	440.355	271.521	246.739	124.02	109.139	301888	185978	111094
Lower quartile	OECD region	OECD Oceania	3.06784e+07	0.475391	1.62841e+07	1.62834e+07	1.15497e+07	4.11809e+06	448512	0	4.60478e+06	1.15497e+07	353.889	7.98713	1.63174e+07	10277.7	1.6307e+07	353.889	1.63063e+07	8051.71	1.62979e+07	1.15497e+07	4.61913e+06	7.98713	1.15497e+07	448512	0	4.1321e+06	13748.5	4.11809e+06	6.33794	1.07826	6.32802	0.00452876	55.5639	288.161	18933.8	1798.3	1308.86	489.38	843.394	519.587	322.106	311.125	161.636	142.649	348661	214800	132942
Median	OECD region	OECD Oceania	3.06784e+07	0.475391	1.66999e+07	1.66991e+07	1.19263e+07	4.257e+06	503251	0	4.76463e+06	1.19262e+07	502.851	15.4482	1.67326e+07	10577.6	1.6722e+07	502.851	1.67216e+07	8337.7	1.6713e+07	1.19263e+07	4.77923e+06	15.4482	1.19262e+07	503251	0	4.27135e+06	14221.8	4.257e+06	12.3364	2.32981	12.327	0.0101135	84.8418	414.452	19492.5	1850.75	1346.83	503.711	878.646	541.622	336.53	325.799	172.064	152.557	361492	222913	138475
Upper quartile	OECD region	OECD Oceania	3.06784e+07	0.475391	1.70863e+07	1.70857e+07	1.22932e+07	4.39403e+06	564518	0	4.92131e+06	1.22932e+07	735.215	27.4817	1.71192e+07	10889.7	1.71082e+07	735.215	1.71076e+07	8625.95	1.7099e+07	1.22932e+07	4.93545e+06	27.4817	1.22932e+07	564518	0	4.40851e+06	14679.4	4.39403e+06	22.0584	4.86131	22.0148	0.0211085	129.531	598.983	20110.2	1907.51	1388.18	519.146	914.569	564.571	351.42	341.413	183.465	162.832	374187	230942	143849
Max	OECD region	OECD Oceania	3.06784e+07	0.475391	1.86482e+07	1.86476e+07	1.37736e+07	5.01565e+06	979463	0	5.59241e+06	1.37736e+07	1965.7	142.879	1.86818e+07	12522.8	1.86705e+07	1965.7	1.86699e+07	10126.8	1.86614e+07	1.37736e+07	5.60635e+06	142.879	1.37736e+07	979463	0	5.03029e+06	16459.5	5.01565e+06	118.384	46.9314	118.327	0.233179	503.588	1602.82	22882.6	2183.64	1592.6	593.507	1108.62	686.798	430.382	403.858	236.047	220.304	435637	272754	169044
Mean	OECD region	OECD Pacific	1.76387e+08	0.0918858	6.70758e+07	6.70758e+07	1.75114e+07	1.36878e+07	1.67065e+06	3.4206e+07	4.95644e+07	1.75114e+07	0	0	6.72274e+07	30707.6	6.71967e+07	0	6.71967e+07	29582.8	6.71671e+07	1.75114e+07	4.96557e+07	0	1.75114e+07	1.67065e+06	3.4206e+07	1.37791e+07	91311.8	1.36878e+07	0	0	0	0	0	0	60290.4	5374.42	3911.55	1462.87	3632.34	2241.4	1390.94	2099.95	1112.28	987.674	1.16305e+06	717988	445059
Min	OECD region	OECD Pacific	1.76387e+08	0.0918858	6.24983e+07	6.24983e+07	1.16118e+07	1.08313e+07	948240	3.14605e+07	4.46437e+07	1.16118e+07	0	0	6.26458e+07	26956	6.26176e+07	0	6.26176e+07	22826.5	6.25903e+07	1.16118e+07	4.47371e+07	0	1.16118e+07	948240	3.14605e+07	1.09226e+07	76285.6	1.08313e+07	0	0	0	0	0	0	50599.6	4693.6	3417.35	1276.25	2752.19	1668.28	1044.93	1675.26	856.527	750.165	899079	560694	338386
Lower quartile	OECD region	OECD Pacific	1.76387e+08	0.0918858	6.5975e+07	6.5975e+07	1.61215e+07	1.29389e+07	1.19994e+06	3.31177e+07	4.81713e+07	1.61215e+07	0	0	6.61248e+07	29737.6	6.60957e+07	0	6.60957e+07	28002.1	6.60652e+07	1.61215e+07	4.82643e+07	0	1.61215e+07	1.19994e+06	3.31177e+07	1.30296e+07	88184.6	1.29389e+07	0	0	0	0	0	0	57884.5	5205.56	3789.23	1416.1	3395.81	2089.51	1296.44	1996.49	1038.2	915.73	1.0966e+06	675470	417579
Median	OECD region	OECD Pacific	1.76387e+08	0.0918858	6.6917e+07	6.6917e+07	1.74992e+07	1.3603e+07	1.44468e+06	3.37779e+07	4.93255e+07	1.74992e+07	0	0	6.70673e+07	30621.3	6.70374e+07	0	6.70374e+07	29343.8	6.70084e+07	1.74992e+07	4.94174e+07	0	1.74992e+07	1.44468e+06	3.37779e+07	1.36964e+07	91310.6	1.3603e+07	0	0	0	0	0	0	59997.7	5357.17	3898.64	1458.61	3584.63	2207.74	1370.92	2091.73	1101.53	976.615	1.1541e+06	712406	441407
Upper quartile	OECD region	OECD Pacific	1.76387e+08	0.0918858	6.80561e+07	6.80561e+07	1.89054e+07	1.43697e+07	1.97203e+06	3.49724e+07	5.07549e+07	1.89054e+07	0	0	6.82104e+07	31545	6.81791e+07	0	6.81791e+07	30940.9	6.81473e+07	1.89054e+07	5.08422e+07	0	1.89054e+07	1.97203e+06	3.49724e+07	1.44646e+07	94476.4	1.43697e+07	0	0	0	0	0	0	62277.9	5522.72	4018.91	1504.01	3823.52	2362.94	1463.42	2195.07	1173.77	1049.03	1.22335e+06	756066	468547
Max	OECD region	OECD Pacific	1.76387e+08	0.0918858	7.33438e+07	7.33438e+07	2.52179e+07	1.78263e+07	4.33809e+06	4.00918e+07	5.82062e+07	2.52179e+07	0	0	7.35028e+07	37746.4	7.34683e+07	0	7.34683e+07	41019.1	7.34365e+07	2.52179e+07	5.82919e+07	0	2.52179e+07	4.33809e+06	4.00918e+07	1.7923e+07	104870	1.78263e+07	0	0	0	0	0	0	77561.4	6446.77	4704.27	1756.01	6002.8	3735.49	2267.32	2748.27	1546.2	1453.49	1.59711e+06	1.02983e+06	640344
Mean	OECD region	Other Africa	1.15249e+09	0.2439	2.16142e+08	9.80569e+07	9.7429e+07	132407	313366	182097	627870	9.05611e+06	1.18085e+08	8.83729e+07	2.39008e+08	2.87291e+06	2.36135e+08	1.18085e+08	1.18049e+08	1.17239e+06	1.16877e+08	9.7429e+07	1.94478e+07	8.83729e+07	9.05611e+06	313366	182097	1.89524e+07	1.882e+07	132407	7.14722e+07	1.69007e+07	7.13989e+07	73386.3	7.41455e+07	4.39399e+07	2.10504e+08	502723	365896	136827	112213	47182.7	65030.1	5.71849e+06	3.03084e+06	2.68764e+06	11285.4	5010.9	6274.48
Min	OECD region	Other Africa	1.15249e+09	0.2439	2.09735e+08	9.228e+07	9.16569e+07	125548	264850	182097	576899	7.48694e+06	1.12145e+08	8.23355e+07	2.32095e+08	2.74845e+06	2.29276e+08	1.12145e+08	1.1253e+08	1.08601e+06	1.11417e+08	9.16569e+07	1.7709e+07	8.23355e+07	7.48694e+06	264850	182097	1.72086e+07	1.70786e+07	125548	6.63972e+07	1.42799e+07	6.63293e+07	59689.9	6.97011e+07	3.9813e+07	2.03944e+08	481788	350556	131105	101453	42324.7	58498.8	5.14293e+06	2.61913e+06	2.30757e+06	5778.04	2285.58	2939.23
Lower quartile	OECD region	Other Africa	1.15249e+09	0.2439	2.14977e+08	9.695e+07	9.63243e+07	127804	309097	182097	620999	8.80843e+06	1.17067e+08	8.72889e+07	2.37792e+08	2.84993e+06	2.3493e+08	1.17067e+08	1.16885e+08	1.15365e+06	1.15719e+08	9.63243e+07	1.90528e+07	8.72889e+07	8.80843e+06	309097	182097	1.85591e+07	1.84265e+07	127804	7.04709e+07	1.633e+07	7.03994e+07	70869.8	7.33078e+07	4.31979e+07	2.0936e+08	498628	362938	135714	109607	46083.7	63427.6	5.5792e+06	2.9391e+06	2.60125e+06	9771.52	4286.97	5391.86
Median	OECD region	Other Africa	1.15249e+09	0.2439	2.16156e+08	9.80409e+07	9.74147e+07	129862	314760	182097	628351	9.05635e+06	1.18072e+08	8.83761e+07	2.39014e+08	2.87247e+06	2.36146e+08	1.18072e+08	1.18008e+08	1.17093e+06	1.1684e+08	9.74147e+07	1.94289e+07	8.83761e+07	9.05635e+06	314760	182097	1.89338e+07	1.87993e+07	129862	7.14685e+07	1.68616e+07	7.13928e+07	73230.8	7.41206e+07	4.39328e+07	2.105e+08	502641	365833	136810	112006	47096	64890.8	5.70953e+06	3.01977e+06	2.67725e+06	11295.9	4959.97	6258.19
Upper quartile	OECD region	Other Africa	1.15249e+09	0.2439	2.17308e+08	9.91478e+07	9.85191e+07	135372	320968	182097	636936	9.32027e+06	1.19122e+08	8.94349e+07	2.40263e+08	2.8949e+06	2.37367e+08	1.19122e+08	1.19221e+08	1.19003e+06	1.18045e+08	9.85191e+07	1.97886e+07	8.94349e+07	9.32027e+06	320968	182097	1.92983e+07	1.9164e+07	135372	7.24754e+07	1.74286e+07	7.24035e+07	75619.2	7.49653e+07	4.46716e+07	2.11684e+08	506697	368764	137934	114564	48141.3	66448.1	5.84328e+06	3.11034e+06	2.76588e+06	12772.4	5720.88	7116.06
Max	OECD region	Other Africa	1.15249e+09	0.2439	2.21588e+08	1.04153e+08	1.03532e+08	166082	371688	182097	682534	1.01421e+07	1.24168e+08	9.49403e+07	2.45155e+08	2.98434e+06	2.42242e+08	1.24168e+08	1.24227e+08	1.27704e+06	1.22979e+08	1.03532e+08	2.21904e+07	9.49403e+07	1.01421e+07	371688	182097	2.17014e+07	2.1569e+07	166082	7.6523e+07	2.07422e+07	7.64388e+07	87591.1	7.90356e+07	4.76847e+07	2.15901e+08	522338	380427	142035	131675	57306.7	75566.7	6.55889e+06	3.58073e+06	3.28267e+06	17213.6	8815.14	10318.8
Mean	OECD region	Other EU	3.18903e+07	0.471278	1.13184e+07	9.58516e+06	9.21847e+06	345473	17789.1	3433.58	366696	9.12757e+06	1.73319e+06	90896.6	1.19454e+07	50966.6	1.18945e+07	1.73319e+06	1.01613e+07	43468.5	1.01178e+07	9.21847e+06	899329	90896.6	9.12757e+06	17789.1	3433.58	878106	532633	345473	73590.3	17306.2	73514.9	75.4553	477611	1.25558e+06	1.91852e+06	8919.15	6491.7	2427.45	4545.4	2087.89	2457.52	161314	85519.7	75794.2	29341.4	16744.3	12597.1
Min	OECD region	Other EU	3.18903e+07	0.471278	1.03887e+07	8.89279e+06	8.53586e+06	255615	17789.1	0	273404	8.45422e+06	1.49274e+06	61386	1.10055e+07	44883.8	1.0959e+07	1.49274e+06	9.36349e+06	35254.5	9.32707e+06	8.53586e+06	680166	61386	8.45422e+06	17789.1	0	662377	339555	255615	50726	10161.8	50677.2	42.2479	372489	1.07641e+06	1.65784e+06	7822.25	5695.78	2126.46	3391.79	1595.43	1796.36	101314	45996	37501.7	19762.2	11158.7	8603.52
Lower quartile	OECD region	Other EU	3.18903e+07	0.471278	1.11253e+07	9.43102e+06	9.06895e+06	319147	17789.1	0	337956	8.97979e+06	1.68324e+06	84869.6	1.17411e+07	49769.7	1.16918e+07	1.68324e+06	9.99856e+06	41596.4	9.9551e+06	9.06895e+06	846502	84869.6	8.97979e+06	17789.1	0	826216	486918	319147	68583.1	15536	68516.4	67.4669	457684	1.2169e+06	1.86429e+06	8700.19	6332.05	2366.05	4300.23	1974.5	2319.09	144251	74299	65272.6	26990.4	15244.9	11588.8
Median	OECD region	Other EU	3.18903e+07	0.471278	1.1315e+07	9.58195e+06	9.21515e+06	341114	17789.1	0	360755	9.12487e+06	1.73186e+06	90589.1	1.19457e+07	50932.2	1.18947e+07	1.73186e+06	1.01566e+07	43395.8	1.01134e+07	9.21515e+06	894776	90589.1	9.12487e+06	17789.1	0	874291	528442	341114	73277.8	17148.2	73200.1	74.6991	476746	1.25429e+06	1.91732e+06	8915.44	6489.08	2426.14	4533.77	2083.13	2449.82	158648	83156.4	73621.1	28956.5	16493.1	12425.1
Upper quartile	OECD region	Other EU	3.18903e+07	0.471278	1.15001e+07	9.73227e+06	9.36376e+06	367144	17789.1	0	387938	9.27055e+06	1.78139e+06	96659.5	1.2134e+07	52155.5	1.20815e+07	1.78139e+06	1.03113e+07	45279.3	1.02669e+07	9.36376e+06	947622	96659.5	9.27055e+06	17789.1	0	925565	574032	367144	78425.6	18929.3	78347.6	82.7848	496824	1.29297e+06	1.972e+06	9129.12	6644.74	2485.29	4778.31	2193.56	2587.53	175932	94018	83811.6	31315.8	17916.9	13410.5
Max	OECD region	Other EU	3.18903e+07	0.471278	1.23253e+07	1.03853e+07	9.97607e+06	532822	17789.1	155344	653916	9.87165e+06	2.04355e+06	126866	1.29812e+07	57478.2	1.29239e+07	2.04355e+06	1.0984e+07	56395.2	1.09352e+07	9.97607e+06	1.24942e+06	126866	9.87165e+06	17789.1	155344	1.23163e+06	823624	532822	102800	29094.9	102698	120.112	597873	1.50244e+06	2.24848e+06	10092	7326.88	2765.11	6215.26	2828.6	3386.65	274982	187899	174957	45512.3	28145.5	20472.6
Mean	OECD region	Other Eurasia	3.1031e+08	0.274969	1.03921e+08	8.79748e+07	8.68578e+07	462507	65836	588678	1.11702e+06	9.76916e+06	1.59466e+07	7.70886e+07	1.13026e+08	481789	1.12544e+08	1.59466e+07	9.65971e+07	548836	9.60483e+07	8.68578e+07	9.19053e+06	7.70886e+07	9.76916e+06	65836	588678	8.53602e+06	8.07351e+06	462507	6.23545e+07	1.47341e+07	6.22905e+07	63943.2	6.46417e+06	9.48247e+06	9.40659e+07	84315.1	61367.2	22947.9	58549.7	25417.7	33131.9	2.45345e+06	1.29956e+06	1.15389e+06	39330.6	18120.3	21210.3
Min	OECD region	Other Eurasia	3.1031e+08	0.274969	1.00783e+08	8.52185e+07	8.41156e+07	351321	33508.1	387265	854208	9.0535e+06	1.47257e+07	7.44041e+07	1.09389e+08	460231	1.08915e+08	1.47257e+07	9.35936e+07	511136	9.3052e+07	8.41156e+07	8.01776e+06	7.44041e+07	9.0535e+06	33508.1	387265	7.40132e+06	6.99022e+06	351321	5.78054e+07	1.21144e+07	5.77484e+07	53541.1	5.76236e+06	8.68159e+06	9.0968e+07	80342.2	58482.2	21860	53423.2	23181.1	30230.7	2.06393e+06	1.06046e+06	947600	28883.7	13360.7	15231.3
Lower quartile	OECD region	Other Eurasia	3.1031e+08	0.274969	1.03267e+08	8.7385e+07	8.62788e+07	439846	53872	516201	1.0336e+06	9.64656e+06	1.56932e+07	7.65255e+07	1.12312e+08	477378	1.11834e+08	1.56932e+07	9.59544e+07	540871	9.54088e+07	8.62788e+07	8.91865e+06	7.65255e+07	9.64656e+06	53872	516201	8.27563e+06	7.81343e+06	439846	6.16198e+07	1.4097e+07	6.15563e+07	61036.4	6.29796e+06	9.32568e+06	9.34323e+07	83538.4	60802.9	22733	57507.6	24948.9	32523.3	2.35955e+06	1.23898e+06	1.09716e+06	37180.1	17104.4	20018.4
Median	OECD region	Other Eurasia	3.1031e+08	0.274969	1.03918e+08	8.7963e+07	8.6847e+07	462056	63228.1	568522	1.09767e+06	9.76726e+06	1.59314e+07	7.70803e+07	1.12994e+08	481619	1.12512e+08	1.59314e+07	9.65639e+07	548509	9.60143e+07	8.6847e+07	9.15785e+06	7.70803e+07	9.76726e+06	63228.1	568522	8.50157e+06	8.03923e+06	462056	6.24046e+07	1.46577e+07	6.23398e+07	63497.4	6.45113e+06	9.47212e+06	9.40616e+07	84280.1	61341.2	22939.7	58481.8	25372.6	33096.7	2.43922e+06	1.28802e+06	1.14247e+06	39251.4	18075.7	21173.2
Upper quartile	OECD region	Other Eurasia	3.1031e+08	0.274969	1.04569e+08	8.858e+07	8.74545e+07	483284	75116.1	645616	1.18375e+06	9.889e+06	1.61754e+07	7.76646e+07	1.13723e+08	485959	1.13238e+08	1.61754e+07	9.72457e+07	556638	9.66967e+07	8.74545e+07	9.43392e+06	7.76646e+07	9.889e+06	75116.1	645616	8.76733e+06	8.30292e+06	483284	6.31139e+07	1.53147e+07	6.30476e+07	66402	6.61522e+06	9.62709e+06	9.46876e+07	85051.8	61901.5	23149	59576.2	25870.5	33722	2.53253e+06	1.34672e+06	1.19878e+06	41346.8	19053.6	22339.8
Max	OECD region	Other Eurasia	3.1031e+08	0.274969	1.07958e+08	9.16257e+07	9.02425e+07	599082	128064	873116	1.49055e+06	1.03579e+07	1.74758e+07	8.03128e+07	1.17488e+08	506342	1.16998e+08	1.74758e+07	1.00665e+08	591381	1.00092e+08	9.02425e+07	1.08654e+07	8.03128e+07	1.03579e+07	128064	873116	1.02815e+07	9.84771e+06	599082	6.63296e+07	1.86512e+07	6.62692e+07	83234.7	7.48299e+06	1.04645e+07	9.7709e+07	88612.2	64454.6	24157.6	64218.2	28260.7	36476.7	3.11072e+06	1.75478e+06	1.59805e+06	52231.1	23961	28889.3
Mean	OECD region	Other non-OECD Asia	1.22067e+09	0.214231	2.86876e+08	2.01823e+08	1.94757e+08	2.63016e+06	1.4552e+06	2.9804e+06	7.06577e+06	5.42151e+07	8.50532e+07	1.40542e+08	3.19671e+08	2.20015e+06	3.17471e+08	8.50532e+07	2.32418e+08	1.81135e+06	2.30607e+08	1.94757e+08	3.58497e+07	1.40542e+08	5.42151e+07	1.4552e+06	2.9804e+06	3.1414e+07	2.87839e+07	2.63016e+06	1.13718e+08	2.68235e+07	1.13602e+08	116702	4.7322e+07	3.77312e+07	2.29607e+08	385043	280247	104795	205068	86001.2	119067	8.74073e+06	4.62997e+06	4.11076e+06	223703	134031	89672.1
Min	OECD region	Other non-OECD Asia	1.22067e+09	0.214231	2.78234e+08	1.94065e+08	1.8756e+08	967582	1.2823e+06	1.6408e+06	4.37994e+06	4.91737e+07	7.98783e+07	1.33971e+08	3.09949e+08	2.11493e+06	3.07808e+08	7.98783e+07	2.24075e+08	1.68688e+06	2.22309e+08	1.8756e+08	3.15751e+07	1.33971e+08	4.91737e+07	1.2823e+06	1.6408e+06	2.79519e+07	2.59069e+07	967582	1.06762e+08	2.41258e+07	1.06647e+08	104902	4.33484e+07	3.39914e+07	2.22885e+08	370382	269770	100572	188673	78439.7	109584	7.73253e+06	4.00903e+06	3.54157e+06	81153.5	46509.4	34644.1
Lower quartile	OECD region	Other non-OECD Asia	1.22067e+09	0.214231	2.85302e+08	2.00304e+08	1.93172e+08	2.20633e+06	1.39249e+06	2.24827e+06	6.26883e+06	5.32322e+07	8.39095e+07	1.39293e+08	3.17971e+08	2.18303e+06	3.15786e+08	8.39095e+07	2.30778e+08	1.78755e+06	2.28966e+08	1.93172e+08	3.48595e+07	1.39293e+08	5.32322e+07	1.39249e+06	2.24827e+06	3.06909e+07	2.81823e+07	2.20633e+06	1.12591e+08	2.62344e+07	1.12476e+08	114135	4.64627e+07	3.6993e+07	2.28257e+08	381915	277981	103951	201816	84499.4	117039	8.51737e+06	4.48425e+06	3.97577e+06	186749	110863	74094.6
Median	OECD region	Other non-OECD Asia	1.22067e+09	0.214231	2.86867e+08	2.01814e+08	1.94747e+08	2.59756e+06	1.43935e+06	2.8218e+06	6.94013e+06	5.41669e+07	8.50459e+07	1.40521e+08	3.19647e+08	2.19914e+06	3.17445e+08	8.50459e+07	2.32416e+08	1.81077e+06	2.30605e+08	1.94747e+08	3.57619e+07	1.40521e+08	5.41669e+07	1.43935e+06	2.8218e+06	3.13871e+07	2.8768e+07	2.59756e+06	1.13686e+08	2.68003e+07	1.13568e+08	116610	4.73064e+07	3.77132e+07	2.29573e+08	384929	280151	104770	204930	85921.6	118981	8.72887e+06	4.62153e+06	4.09647e+06	220016	131381	87427.4
Upper quartile	OECD region	Other non-OECD Asia	1.22067e+09	0.214231	2.88392e+08	2.03323e+08	1.96295e+08	3.01601e+06	1.50321e+06	3.51396e+06	7.74627e+06	5.51554e+07	8.61566e+07	1.41729e+08	3.21356e+08	2.21714e+06	3.19147e+08	8.61566e+07	2.34048e+08	1.83454e+06	2.32216e+08	1.96295e+08	3.67517e+07	1.41729e+08	5.51554e+07	1.50321e+06	3.51396e+06	3.21171e+07	2.9351e+07	3.01601e+06	1.14845e+08	2.73966e+07	1.14726e+08	119049	4.81356e+07	3.84317e+07	2.30924e+08	388047	282445	105616	208325	87487.9	121019	8.94524e+06	4.76366e+06	4.22896e+06	257353	154163	103148
Max	OECD region	Other non-OECD Asia	1.22067e+09	0.214231	2.94463e+08	2.09503e+08	2.03152e+08	5.31275e+06	2.04877e+06	7.23812e+06	1.24421e+07	5.91081e+07	9.05253e+07	1.47389e+08	3.27769e+08	2.30991e+06	3.2551e+08	9.05253e+07	2.40737e+08	1.9536e+06	2.38903e+08	2.03152e+08	4.1481e+07	1.47389e+08	5.91081e+07	2.04877e+06	7.23812e+06	3.56523e+07	3.26257e+07	5.31275e+06	1.20649e+08	3.08841e+07	1.20528e+08	132035	5.27586e+07	4.19912e+07	2.36856e+08	405474	295024	110450	223843	94535.3	131324	1.02838e+07	5.60042e+06	5.12376e+06	452122	266019	211137
Mean	OECD region	Other OECD America	2.01238e+08	0.191022	7.08259e+07	6.28897e+07	5.99111e+07	2.46482e+06	513788	0	2.97861e+06	5.94669e+07	7.9362e+06	444196	7.6374e+07	208856	7.61652e+07	7.9362e+06	6.8229e+07	223946	6.8005e+07	5.99111e+07	8.09393e+06	444196	5.94669e+07	513788	0	7.58014e+06	5.11532e+06	2.46482e+06	359472	84723.7	359104	368.376	2.40879e+06	5.5274e+06	8.8132e+06	36551.3	26603	9948.31	25940.8	11613.9	14326.9	1.55083e+06	822211	728619	209402	104270	105132
Min	OECD region	Other OECD America	2.01238e+08	0.191022	6.75938e+07	6.01195e+07	5.69577e+07	1.91096e+06	503676	0	2.42907e+06	5.64939e+07	7.31276e+06	417878	7.31923e+07	199152	7.29864e+07	7.31276e+06	6.4989e+07	204044	6.47658e+07	5.69577e+07	7.0394e+06	417878	5.64939e+07	503676	0	6.52404e+06	4.10666e+06	1.91096e+06	267303	47735.3	267080	220.128	2.14475e+06	5.14866e+06	8.18598e+06	34764.2	25292.5	9471.71	23299.1	10347.5	12895.1	1.25747e+06	628774	537124	148952	72310.3	74165
Lower quartile	OECD region	Other OECD America	2.01238e+08	0.191022	7.02664e+07	6.23705e+07	5.93929e+07	2.34229e+06	508182	0	2.85593e+06	5.89522e+07	7.81149e+06	438543	7.57609e+07	206820	7.55522e+07	7.81149e+06	6.76503e+07	219876	6.74272e+07	5.93929e+07	7.8311e+06	438543	5.89522e+07	508182	0	7.31804e+06	4.88107e+06	2.34229e+06	345371	67545.1	345033	292.453	2.35407e+06	5.44276e+06	8.68676e+06	36194.5	26339.7	9850.56	25344.1	11341.6	13989.6	1.46375e+06	765742	677610	196549	96913.4	98608.8
Median	OECD region	Other OECD America	2.01238e+08	0.191022	7.0813e+07	6.28847e+07	5.99031e+07	2.45429e+06	511407	0	2.9675e+06	5.94599e+07	7.93216e+06	444027	7.63602e+07	208854	7.61504e+07	7.93216e+06	6.82162e+07	223727	6.79935e+07	5.99031e+07	8.07129e+06	444027	5.94599e+07	511407	0	7.55934e+06	5.08283e+06	2.45429e+06	363331	80350.7	363001	345.315	2.40716e+06	5.52364e+06	8.80755e+06	36547.2	26599.1	9946.97	25898.8	11590.6	14306.8	1.53733e+06	809512	717011	209034	103903	104971
Upper quartile	OECD region	Other OECD America	2.01238e+08	0.191022	7.13955e+07	6.3425e+07	6.04452e+07	2.58137e+06	516739	0	3.09504e+06	6.0001e+07	8.05488e+06	449803	7.69781e+07	210888	7.67686e+07	8.05488e+06	6.88138e+07	227749	6.85883e+07	6.04452e+07	8.33434e+06	449803	6.0001e+07	516739	0	7.81999e+06	5.32764e+06	2.58137e+06	376456	98436.5	376089	423.282	2.45998e+06	5.61097e+06	8.93447e+06	36906.1	26862.7	10045.2	26500.7	11861.8	14644.8	1.62065e+06	865679	767398	222017	111272	111369
Max	OECD region	Other OECD America	2.01238e+08	0.191022	7.37881e+07	6.58002e+07	6.28986e+07	3.30103e+06	559829	0	3.8112e+06	6.24574e+07	8.66897e+06	481839	7.98832e+07	220531	7.96719e+07	8.66897e+06	7.15246e+07	247911	7.12927e+07	6.28986e+07	9.57378e+06	481839	6.24574e+07	559829	0	9.05386e+06	6.4383e+06	3.30103e+06	412664	170873	412234	866.162	2.69846e+06	6.00768e+06	9.56812e+06	38674.3	28151.8	10522.5	29313.5	13115.3	16229.7	2.24076e+06	1.31084e+06	1.18807e+06	275126	141597	141303
Mean	OECD region	USA	3.35909e+08	0.136417	2.26354e+08	2.26354e+08	1.57702e+08	6.52973e+07	2.51294e+06	841075	6.86513e+07	1.57702e+08	0	0	2.26824e+08	176569	2.26647e+08	0	2.26647e+08	151725	2.26495e+08	1.57702e+08	6.8793e+07	0	1.57702e+08	2.51294e+06	841075	6.5439e+07	141675	6.52973e+07	0	0	0	0	0	0	328294	30897.8	22488.4	8409.34	16755.8	10338.6	6417.23	3259.12	1726.98	1532.13	5.54979e+06	3.42347e+06	2.12633e+06
Min	OECD region	USA	3.35909e+08	0.136417	2.1077e+08	2.1077e+08	1.45032e+08	5.70786e+07	675942	10100	5.97084e+07	1.45032e+08	0	0	2.11227e+08	164679	2.11058e+08	0	2.11058e+08	137266	2.10913e+08	1.45032e+08	5.98497e+07	0	1.45032e+08	675942	10100	5.72199e+07	125962	5.70786e+07	0	0	0	0	0	0	304281	28886.9	21034.4	7852.53	15075.5	9295.54	5778.23	2789.59	1406.66	1256.12	4.88466e+06	3.03877e+06	1.84589e+06
Lower quartile	OECD region	USA	3.35909e+08	0.136417	2.23201e+08	2.23201e+08	1.5508e+08	6.37286e+07	1.95043e+06	292761	6.68935e+07	1.5508e+08	0	0	2.23671e+08	174308	2.23495e+08	0	2.23495e+08	149096	2.23345e+08	1.5508e+08	6.70329e+07	0	1.5508e+08	1.95043e+06	292761	6.38686e+07	138708	6.37286e+07	0	0	0	0	0	0	323733	30504.7	22200	8301.85	16419.8	10127.1	6281.38	3157.32	1656.1	1462.34	5.40852e+06	3.33394e+06	2.06727e+06
Median	OECD region	USA	3.35909e+08	0.136417	2.26165e+08	2.26165e+08	1.57563e+08	6.52704e+07	2.42494e+06	723555	6.85863e+07	1.57563e+08	0	0	2.26636e+08	176478	2.26459e+08	0	2.26459e+08	151615	2.26307e+08	1.57563e+08	6.87281e+07	0	1.57563e+08	2.42494e+06	723555	6.54111e+07	141626	6.52704e+07	0	0	0	0	0	0	328121	30882.5	22479	8404.76	16746.1	10331	6410.23	3252.38	1720.29	1524.87	5.54356e+06	3.41826e+06	2.12326e+06
Upper quartile	OECD region	USA	3.35909e+08	0.136417	2.29513e+08	2.29513e+08	1.60147e+08	6.67971e+07	2.96951e+06	1.22524e+06	7.03166e+07	1.60147e+08	0	0	2.29982e+08	178752	2.29804e+08	0	2.29804e+08	154240	2.29649e+08	1.60147e+08	7.04589e+07	0	1.60147e+08	2.96951e+06	1.22524e+06	6.69357e+07	144594	6.67971e+07	0	0	0	0	0	0	332731	31282.4	22768.3	8516.46	17066.2	10535.5	6538.68	3354.72	1792.21	1593.72	5.6845e+06	3.50742e+06	2.1813e+06
Max	OECD region	USA	3.35909e+08	0.136417	2.42497e+08	2.42497e+08	1.70794e+08	7.44202e+07	7.01597e+06	4.32744e+06	7.96074e+07	1.70794e+08	0	0	2.42969e+08	190115	2.42787e+08	0	2.42787e+08	167486	2.42636e+08	1.70794e+08	7.97477e+07	0	1.70794e+08	7.01597e+06	4.32744e+06	7.45591e+07	155853	7.44202e+07	0	0	0	0	0	0	357229	33322.5	24243.1	9079.42	19184.8	11852	7350.32	3817.48	2191.73	1961.72	6.31938e+06	3.92625e+06	2.49911e+06
[truncated: 36 more columns]

## Sheet: 01a_Processes_legend
Process_ID	Process_short_name	Process_long_name	Unit
tP1	Generated_MSW_trib	MSW generated (tributary model)	t·y-1
tP2	Collected_MSW_trib	MSW collected (tributary model)	t·y-1
tP3	Disp_MSW_trib	MSW collected for diposal (tributary model)	t·y-1
tP4i	Dry_recy_form_trib	Dry recyclables collected by formal sector (tributary model)	t·y-1
tP4ii	Other_recv_trib	Other recovery of MSW (tributary model)	t·y-1
tP4iii	Incin_trib	Incineration (tributary model)	t·y-1
tP4	Treat_recover_trib	MSW collected for treatment or recovery (tributary model)	t·y-1
tP5	Controlled_disp_trib	Controlled disposal of MSW (tributary model)	t·y-1
tP8	Uncollected_trib	Uncollected MSW (tributary model)	t·y-1
tP9	Uncontrolled_disp_trib	Uncontrolled disposal of MSW (tributary model)	t·y-1
P1	Generated_MSW	MSW generated	t·y-1
P2	Litter	Uncollected litter	t·y-1
P3	Generated_MSW_exc_litter	Generated MSW excluding uncollected litter	t·y-1
P4	Uncollected_MSW	Uncollected MSW	t·y-1
P5	Collected_MSW	Collected MSW	t·y-1
P6	Col_emissions	Collection system debris emissions	t·y-1
P7	Col_deliver	Collected and delivered MSW	t·y-1
P8	Disp_MSW	Collected MSW for disposal	t·y-1
P9	Treat_recover_MSW	Collected MSW for treatment or recovery	t·y-1
P10	Uncontrolled_disp	Uncontrolled disposal of MSW	t·y-1
P11	Controlled_disp	Controlled disposal of MSW	t·y-1
P12i	Other_treat_MSW	Other treatement of MSW (composting, AD)	t·y-1
P12ii	Incin	Incineration	t·y-1
P13	Dry_recy	Collected for dry recycling	t·y-1
P14	Dry_recy_inf	Informal sector collection for dry recycling	t·y-1
P15	Dry_recy_form_trib	Formal sector collection for dry recycling	t·y-1
P16	Disp_uncontrolled_unburnt	Uncontrolled disposal of MSW unburnt	t·y-1
P17	Disp_uncontrolled_burnt	Uncontrolled disposal of MSW openly burnt	t·y-1
P18	Disp_uncontrolled_unburnt_retained	Uncontrolled disposal of MSW unburnt and retained	t·y-1
P19	Disp_emissions	Disposal system MSW debris emissions	t·y-1
P20	Uncol_unburnt	Uncollected MSW unburnt	t·y-1
P21	Uncol_burnt	Uncollected MSW openly burnt	t·y-1
P100	Misman	Mismanaged MSW	t·y-1
P2a	Litter_plastic	Uncollected plastic litter	t·y-1
P2aa	Litter_rigid	Uncollected rigid plastic litter	t·y-1
P2ab	Litter_flex	Uncollected flexible plastic litter	t·y-1
P6a	Col_emissions_plastic	Collection system plastic debris emissions	t·y-1
P6aa	Col_emissions_rigid	Collection system rigid plastic debris emissions	t·y-1
P6ab	Col_emissions_flex	Collection system flexible plastic debris emissions	t·y-1
P14a	Dry_recy_inf_plastic	Informal sector collection of plastic for dry recycling	t·y-1
P14aa	Dry_recy_inf_rigid	Informal sector collection of rigid plastic for dry recycling	t·y-1
P14ab	Dry_recy_inf_flex	Informal sector collection of flexible plastic for dry recycling	t·y-1
P15a	Dry_recy_form_plastic	Formal sector collection of plastic for dry recycling	t·y-1
P15aa	Dry_recy_form_rigid	Formal sector collection of rigid plastic for dry recycling	t·y-1
P15ab	Dry_recy_form_flex	Formal sector collection of flexible plastic for dry recycling	t·y-1
P17a	Disp_uncontrolled_burnt_plastic	Uncontrolled disposal of plastic openly burnt	t·y-1
P17aa	Disp_uncontrolled_burnt_rigid	Uncontrolled disposal of rigid plastic openly burnt	t·y-1
P17ab	Disp_uncontrolled_burnt_flex	Uncontrolled disposal of flexible plastic openly burnt	t·y-1
P19a	Disp_emissions_plastic	Disposal system plastic debris emissions	t·y-1
P19aa	Disp_emissions_rigid	Disposal system plastic rigid debris emissions	t·y-1
P19ab	Disp_emissions_flex	Disposal system plastic flexible debris emissions	t·y-1
P20a	Uncol_unburnt_plastic	Uncollected unburnt plastic	t·y-1
P20aa	Uncol_unburnt_rigid	Uncollected unburnt rigid plastic	t·y-1
P20ab	Uncol_unburnt_flex	Uncollected unburnt flexible plastic	t·y-1
P21a	Uncol_burnt_plastic	Uncollected plastic openly burnt	t·y-1
P21aa	Uncol_burnt_rigid	Uncollected rigid plastic openly burnt	t·y-1
P21ab	Uncol_burnt_flex	Uncollected flexible plastic openly burnt	t·y-1
P22aa	Dry_recy_inf_loss_rigid	Sorting losses of rigid plastic from informal collection for dry recycling	t·y-1
P22ab	Dry_recy_inf_loss_flex	Sorting losses of flexible plastic from informal collection for dry recycling	t·y-1
P23aa	Dry_recy_inf_sorted_rigid	Sorted rigid plastic from informal collection for dry recycling	t·y-1
P23ab	Dry_recy_inf_sorted_flex	Sorted flexible plastic from informal collection for dry recycling	t·y-1
P24aa	Dry_recy_form_loss_rigid	Sorting losses of rigid plastic from formal collection for dry recycling	t·y-1
P24ab	Dry_recy_form_loss_flex	Sorting losses of flexible plastic from formal collection for dry recycling	t·y-1
P25aa	Dry_recy_form_sorted_rigid	Sorted rigid plastic from formal collection for dry recycling	t·y-1
P25ab	Dry_recy_form_sorted_flex	Sorted flexible plastic from formal collection for dry recycling	t·y-1
P26aa	Dry_recy_inf_loss_mis_rigid	Mismanaged sorting losses of rigid plastic from informal collection for dry recycling	t·y-1
P26ab	Dry_recy_inf_loss_mis_flex	Mismanaged sorting losses of flexible plastic from informal collection for dry recycling	t·y-1
P27aa	Dry_recy_inf_loss_man_rigid	Managed sorting losses of rigid plastic from informal collection for dry recycling	t·y-1
P27ab	Dry_recy_inf_loss_man_flex	Managed sorting losses of flexible plastic from informal collection for dry recycling	t·y-1
P28aa	Dry_recy_form_loss_mis_rigid	Mismanaged sorting losses of rigid plastic from formal collection for dry recycling	t·y-1
P28ab	Dry_recy_form_loss_mis_flex	Mismanaged sorting losses of flexible plastic from formal collection for dry recycling	t·y-1
P29aa	Dry_recy_form_loss_man_rigid	Managed sorting losses of rigid plastic from formal collection for dry recycling	t·y-1
P29ab	Dry_recy_form_loss_man_flex	Managed sorting losses of flexible plastic from formal collection for dry recycling	t·y-1
P30aa	Dry_recy_inf_loss_mis_burnt_rigid	Informal sector mismanaged sorting losses of rigid plastic open burnt	t·y-1
P30ab	Dry_recy_inf_loss_mis_burnt_flex	Informal sector mismanaged sorting losses of flexible plastic open burnt	t·y-1
P31aa	Dry_recy_inf_loss_mis_unburnt_rigid	Informal sector mismanaged sorting losses of rigid plastic unburnt	t·y-1
P31ab	Dry_recy_inf_loss_mis_unburnt_flex	Informal sector mismanaged sorting losses of flexible plastic unburnt	t·y-1
P32aa	Dry_recy_form_loss_mis_burnt_rigid	Formal sector mismanaged sorting losses of rigid plastic open burnt	t·y-1
P32ab	Dry_recy_form_loss_mis_burnt_flex	Formal sector mismanaged sorting losses of flexible plastic open burnt	t·y-1
P33aa	Dry_recy_form_loss_mis_unburnt_rigid	Formal sector mismanaged sorting losses of rigid plastic unburnt	t·y-1
P33ab	Dry_recy_form_loss_mis_unburnt_flex	Formal sector mismanaged sorting losses of flexible plastic unburnt	t·y-1

## Sheet: 02_Coefficients
				Coefficient short name:	Plastic_MSW	Rigid_plastic	Uncol_litter_pct	MSW_col_pct	Col_sys_deb_em_pct	MSW_recv_pct	Cont_disp_pct	MSW_recy_pct	Comp_pct	Incin_pct	Form_dry_recy_pct	Disp_open_burn_pct	Disp_debris_em_pct	Uncol_burnt_pct	Uncol_litter_plas_pct	Uncol_burnt_plas_pct	Col_sys_deb_em_plas_pct	Disp_debris_em_plas_pct	Inf_plas_col_pct	Form_plas_col_pct	Uncon_disp_burnt_plas_pct	Uncol_unburnt_plas_pct	Uncol_litter_plas_rig_pct	Uncol_burnt_plas_rig_pct	Col_sys_deb_em_plas_rig_pct	Disp_debris_em_plas_rig_pct	Uncon_disp_burnt_plas_rig_pct	Uncol_unburnt_plas_rig_pct	Inf_plas_rig_col_pct	Form_plas_rig_col_pct	Inf_rig_sort_loss_pct	Inf_flex_sort_loss_pct	Form_rig_sort_loss_pct	Form_flex_sort_loss_pct	Inf_rig_mis_sort_loss_pct	Inf_flex_mis_sort_loss_pct	Form_rig_mis_sort_loss_pct	Form_flex_mis_sort_loss_pct	Inf_rig_mis_sort_loss_burnt_pct	Inf_flex_mis_sort_loss_burnt_pct	Form_rig_mis_sort_loss_burnt_pct	Form_flex_mis_sort_loss_burnt_pct
Statistic	Aggregation_lv1	Aggregation_lv2	Population_2020	Rural_share	C0	C0a	C1	C2	C3	C4	C5	C6i	C6ii	C6iii	C7	C8	C9	C10	C11	C12	C13	C14	C15	C16	C17	C18	C11a	C12a	C13a	C14a	C17a	C18a	C21a	C22a	C23aa	C23ab	C24aa	C24ab	C25aa	C25ab	C26aa	C26ab	C27aa	C27ab	C28aa	C28ab
Mean	World	World	7.83433e+09	0.202025	10.9225	43.7907	0.438815	84.9507	0.429138	27.965	57.3203	57.7135	37.2677	5.01881	48.1272	19.1047	0.102669	53.601	17.5	10.5614	10.9225	50.0008	30.2888	8.49909	10.7746	10.117	72.7832	42.6497	43.7907	9.99828	42.5056	42.0881	52.993	61.3061	18.8412	14.9007	40.7409	58.0776	12.0007	12.0017	0.0327257	0.0640681	43.8954	43.8774	65.8838	66.369
Min	World	World	7.83433e+09	0.202025	10.6722	43.2711	0.430904	84.5357	0.416597	27.138	56.5318	55.6069	35.334	4.34128	46.1363	18.0068	0.0965332	52.1961	17.4353	10.1687	10.6722	49.5788	29.3291	8.24341	10.2339	9.78385	72.7137	41.8993	43.2711	9.75014	41.2425	41.1291	50.664	59.9512	18.6891	14.7276	40.2729	57.3127	11.0676	10.9846	0.0277827	0.0532637	40.9155	41.7058	62.6004	63.7887
Lower quartile	World	World	7.83433e+09	0.202025	10.8756	43.6878	0.437319	84.869	0.426867	27.8061	57.1648	57.3358	36.904	4.85815	47.7361	18.8631	0.101419	53.3134	17.4881	10.4881	10.8756	49.9198	30.1128	8.45649	10.6829	10.0455	72.7705	42.5058	43.6878	9.95818	42.2999	41.926	52.5778	61.0678	18.8133	14.8796	40.6524	57.9534	11.8249	11.8249	0.0315863	0.0618748	43.5007	43.4805	65.4221	65.9065
Median	World	World	7.83433e+09	0.202025	10.9222	43.7911	0.438802	84.9486	0.429009	27.9655	57.3198	57.7121	37.2687	5.00519	48.1187	19.0975	0.102653	53.5958	17.4998	10.5595	10.9222	50.0013	30.2893	8.49931	10.7712	10.1166	72.783	42.6532	43.7911	9.99901	42.4939	42.0857	52.9878	61.3031	18.8402	14.9009	40.7425	58.0791	11.999	12.003	0.0326801	0.0639358	43.9037	43.8754	65.8876	66.3754
Upper quartile	World	World	7.83433e+09	0.202025	10.9683	43.8941	0.440284	85.0332	0.431398	28.1205	57.4718	58.0741	37.6205	5.16704	48.5113	19.3371	0.103849	53.8909	17.5119	10.6313	10.9683	50.0834	30.4652	8.54239	10.8646	10.189	72.7958	42.7935	43.8941	10.0392	42.6966	42.2509	53.407	61.5408	18.8693	14.9226	40.8261	58.2035	12.1826	12.1776	0.033797	0.0662192	44.2863	44.2862	66.368	66.8269
Max	World	World	7.83433e+09	0.202025	11.1859	44.4099	0.447169	85.3678	0.44163	28.8288	58.4122	59.6396	39.2186	6.2044	50.3314	20.3514	0.110298	55.3408	17.5606	10.9023	11.1859	50.4651	31.383	8.72855	11.3942	10.4579	72.8539	43.4226	44.4099	10.2215	44.0449	42.9339	55.7082	62.5549	18.9945	15.0236	41.1927	58.7386	12.919	12.9095	0.0397072	0.0754309	46.2243	45.7707	68.6365	69.276
Mean	Income category	HIC	1.21752e+09	0.234527	11.8114	61.6844	0.0695051	99.9565	0.0650773	37.6994	99.1411	60.8974	33.9137	5.18891	99.6344	19.1041	0.103363	63.433	17.5	12.1034	11.8114	50.0955	2.81677	8.49906	14.1954	12.1556	72.7833	59.0172	61.6844	9.9673	61.6983	60.6721	53.0332	61.6906	18.8393	14.9022	40.7409	58.0772	1.29807	1.28596	0.00133489	0.0013448	63.697	63.7104	34.1631	34.344
Min	Income category	HIC	1.21752e+09	0.234527	11.4059	60.5088	0.0669345	99.9294	0.0618791	35.9151	98.3712	57.81	31.2784	3.95138	99.5943	0.740388	0.00819357	50.7797	17.3842	9.43476	11.4059	40.6297	2.45618	8.23619	3.72547	9.15479	72.6504	52.4041	60.5088	5.39068	33.149	51.5967	44.9404	60.2912	18.0602	14.3963	40.2798	57.2856	0.208547	0.186597	0.000790124	0.000784376	46.8123	44.031	17.5067	19.5619
Lower quartile	Income category	HIC	1.21752e+09	0.234527	11.7311	61.4963	0.0690526	99.9526	0.0644302	37.3248	98.9361	60.3721	33.3679	4.88751	99.6283	11.6742	0.0635707	61.1543	17.4795	11.5861	11.7311	47.9314	2.71193	8.45566	12.0026	11.6599	72.7608	57.7197	61.4963	8.84947	57.1235	59.5269	51.5476	61.4509	18.7511	14.8352	40.6504	57.9502	0.923785	0.908366	0.00117485	0.00118534	59.8951	59.9385	31.79	31.992
Median	Income category	HIC	1.21752e+09	0.234527	11.8107	61.6838	0.0695087	99.9571	0.0650775	37.7008	99.2053	60.9098	33.8889	5.14638	99.6345	17.831	0.0955396	63.4191	17.5007	12.0789	11.8107	50.0688	2.79938	8.49948	13.3902	12.1321	72.7831	59.0039	61.6838	9.96759	61.6223	60.6854	53.0274	61.686	18.8395	14.903	40.7414	58.08	1.20936	1.20518	0.00130952	0.00131534	63.781	63.8507	34.1777	34.3236
Upper quartile	Income category	HIC	1.21752e+09	0.234527	11.8912	61.8706	0.0699404	99.9609	0.0656964	38.0615	99.3601	61.4384	34.432	5.45837	99.6406	25.0715	0.135334	65.7187	17.5208	12.5809	11.8912	52.1869	2.90184	8.54368	15.8253	12.6113	72.8059	60.2386	61.8706	11.0894	66.4431	61.7636	54.473	61.9302	18.9284	14.9705	40.8268	58.2034	1.58866	1.58514	0.00145613	0.00146501	67.5672	67.502	36.5497	36.7939
Max	Income category	HIC	1.21752e+09	0.234527	12.2956	62.9783	0.0720562	99.9741	0.0684337	40.0636	99.6185	63.5695	36.606	7.16537	99.6663	67.8612	0.335098	74.8521	17.6054	15.9904	12.2956	58.5079	3.50049	8.72886	26.3593	15.6408	72.9134	67.7688	62.9783	14.1598	94.7251	69.072	63.3454	62.9765	19.5753	15.5566	41.2089	58.7349	4.75635	3.76716	0.00348573	0.00408515	80.942	80.954	49.3827	48.6135
Mean	Income category	LIC	7.31313e+08	0.242077	9.06795	42.0236	1.71411	44.1818	1.69216	15.0329	2.24295	97.0328	2.18857	0.778678	0.395513	19.1004	0.102596	71.0453	17.4988	8.49078	9.06795	50.0017	30.3792	8.51019	8.81849	8.266	72.7827	42.0674	42.0236	10.0006	42.0776	42.0087	52.9787	60.997	18.8406	14.9013	40.7441	58.0395	54.5403	54.4906	0.544931	0.597902	30.0793	30.075	30.9121	30.5615
Min	Income category	LIC	7.31313e+08	0.242077	8.43874	39.5054	1.64532	41.9916	1.57067	13.5412	1.78603	96.8016	2.02571	0.708762	0.00044173	16.7539	0.0900549	68.6825	17.3267	7.74642	8.43874	48.9687	28.41	4.68796	7.73452	7.74846	72.6216	39.376	39.5054	9.46262	37.9634	39.7904	48.5385	16.2485	18.4469	14.659	33.201	47.8405	48.9615	48.8386	0.00120494	0.00343035	26.8668	27.3598	2.04034	2.20815
Lower quartile	Income category	LIC	7.31313e+08	0.242077	8.93149	41.6164	1.70028	43.6743	1.66642	14.7479	2.13084	96.983	2.15396	0.763645	0.164799	18.6056	0.09997	70.6047	17.4662	8.34824	8.93149	49.8308	30.0274	7.58753	8.66281	8.15385	72.7476	41.6724	41.6164	9.91568	41.5936	41.6959	52.0852	56.6155	18.7866	14.8552	39.0478	55.5727	53.7747	53.7466	0.0181619	0.0359788	29.5397	29.538	20.3909	20.9846
Median	Income category	LIC	7.31313e+08	0.242077	9.06008	42.0164	1.71351	44.1506	1.69146	15.0288	2.23033	97.0331	2.18839	0.778669	0.344143	19.0758	0.102408	71.0538	17.4999	8.48252	9.06008	50	30.382	8.50418	8.80924	8.26109	72.7823	42.0726	42.0164	10.0018	42.0721	42.0115	52.994	61.3772	18.8391	14.9011	40.728	58.0157	54.6032	54.5822	0.047479	0.0743617	30.0339	30.0321	30.98	30.4889
Upper quartile	Income category	LIC	7.31313e+08	0.242077	9.19404	42.4354	1.7274	44.6594	1.71719	15.3141	2.3461	97.0799	2.22488	0.79372	0.566168	19.5774	0.105072	71.5013	17.5321	8.61952	9.19404	50.1739	30.7405	9.42568	8.96327	8.36976	72.8185	42.4761	42.4354	10.0835	42.5468	42.3263	53.8666	65.9914	18.8949	14.9459	42.4882	60.4654	55.375	55.3503	0.111544	0.152528	30.5542	30.5733	41.2234	40.2278
Max	Income category	LIC	7.31313e+08	0.242077	10.3509	46.4843	1.77849	46.8096	1.8608	16.626	2.91581	97.2632	2.349	0.857941	1.78852	22.1395	0.119811	73.5624	17.6791	9.48983	10.3509	51.3107	32.4972	12.5096	10.1652	8.89959	72.9628	45.2903	46.4843	10.5058	46.1622	43.9868	57.5746	89.5779	19.2082	15.1545	48.5438	68.829	58.6825	58.4571	16.9803	16.9803	34.5854	34.2897	64.4868	63.3134
Mean	Income category	LMC	3.17659e+09	0.196434	10.5818	41.6217	0.681603	73.589	0.777346	16.2597	10.0245	89.3434	0.307571	10.349	0.0482955	19.1033	0.102663	56.5605	17.5	10.5904	10.5818	50.001	30.3803	8.50031	10.6014	10.607	72.7832	41.459	41.6217	9.99883	41.5112	41.4429	52.9817	41.5067	18.8414	14.9012	40.7459	58.0778	16.1003	16.0997	12.3146	12.1924	43.4361	43.4114	43.1265	43.0783
Min	Income category	LMC	3.17659e+09	0.196434	10.2363	40.5216	0.668173	72.6452	0.751877	15.439	9.46253	86.9779	0.285874	8.4113	0.0262235	17.6721	0.0958405	54.1271	17.3825	9.89384	10.2363	49.4329	29.1032	7.47952	9.94241	10.0722	72.6902	40.0509	40.5216	9.72705	40.005	40.1039	50.1206	33.0882	18.5521	14.7174	38.5024	55.0874	14.5468	14.5838	7.27247	7.17505	39.0228	40.4532	29.3814	29.126
Lower quartile	Income category	LMC	3.17659e+09	0.196434	10.509	41.4379	0.67904	73.4057	0.771746	16.0846	9.93484	88.9585	0.304007	9.94028	0.0431179	18.8286	0.1012	56.0682	17.4819	10.4625	10.509	49.9093	30.143	8.30884	10.4822	10.4964	72.765	41.2096	41.4379	9.95225	41.2456	41.2129	52.4264	40.2678	18.8063	14.8729	40.3617	57.5567	15.8332	15.8263	11.3179	11.1897	42.86	42.8182	40.4192	40.4744
Median	Income category	LMC	3.17659e+09	0.196434	10.5794	41.625	0.681552	73.5885	0.777099	16.2554	10.0233	89.3634	0.307622	10.3268	0.0478882	19.1009	0.102624	56.5515	17.5	10.5904	10.5794	50.0033	30.3928	8.49699	10.5952	10.6059	72.7834	41.459	41.625	10	41.5099	41.4407	52.9878	41.4895	18.8422	14.901	40.7486	58.0769	16.0914	16.101	12.2801	12.1616	43.435	43.4145	43.1738	43.0369
Upper quartile	Income category	LMC	3.17659e+09	0.196434	10.6527	41.8034	0.684082	73.7702	0.78286	16.4265	10.1131	89.7518	0.311136	10.734	0.0529906	19.3734	0.104115	57.0401	17.5181	10.7142	10.6527	50.0977	30.6173	8.68491	10.7163	10.7161	72.8012	41.7083	41.8034	10.0462	41.7788	41.6726	53.5346	42.779	18.877	14.9293	41.1279	58.6126	16.3687	16.3731	13.2557	13.1625	44.0164	44.0051	45.8206	45.7432
Max	Income category	LMC	3.17659e+09	0.196434	10.9774	42.646	0.694403	74.6606	0.807594	17.4293	10.4673	91.279	0.325367	12.7207	0.0772423	20.5775	0.11075	59.2308	17.6009	11.15	10.9774	50.508	31.9358	9.4234	11.3006	11.1406	72.8964	42.827	42.646	10.2711	43.3593	42.6969	55.8888	48.161	19.0363	15.056	42.8436	61.2695	17.4678	17.5827	17.3442	18.1514	46.9143	46.7452	57.2661	56.9472
Mean	Income category	UMC	2.7089e+09	0.181168	11.8863	44.4039	0.313134	89.4884	0.401028	28.7935	70.2901	39.2685	57.9581	2.77335	4.09287	19.1087	0.102694	32.3598	17.5011	11.2549	11.8863	49.9978	30.3809	8.50069	11.7361	11.5584	72.7837	44.3979	44.4039	9.99718	44.4234	44.3984	53.0051	44.4145	18.841	14.9001	40.7447	58.089	3.62134	3.62043	1.85555	1.85589	67.2037	67.2067	68.8832	68.8813
Min	Income category	UMC	2.7089e+09	0.181168	11.5301	43.909	0.305495	88.9177	0.385735	27.7464	69.3389	36.734	55.0618	2.18701	3.45285	16.5964	0.0903898	31.1301	17.3997	10.8856	11.5301	48.9626	28.7874	7.3883	10.8954	11.0535	72.693	43.9026	43.909	9.44851	43.089	43.7612	49.3186	41.121	18.5738	14.6371	38.5257	54.0994	3.08663	3.16037	1.35559	1.31013	65.4406	65.8284	66.3593	66.343
Lower quartile	Income category	UMC	2.7089e+09	0.181168	11.8168	44.331	0.311757	89.3863	0.397719	28.5441	70.1021	38.6665	57.407	2.61525	3.90293	18.559	0.0997736	32.1081	17.4838	11.1793	11.8168	49.8199	30.091	8.23745	11.5679	11.4682	72.7659	44.3187	44.331	9.90912	44.2318	44.3015	52.3234	43.8286	18.796	14.8663	40.2563	57.3911	3.54623	3.54183	1.75274	1.75568	66.9853	66.9763	68.4614	68.4661
Median	Income category	UMC	2.7089e+09	0.181168	11.8869	44.4057	0.313148	89.4885	0.401047	28.792	70.2864	39.2586	57.9613	2.75076	4.05675	19.0612	0.102454	32.3566	17.5005	11.2563	11.8869	49.9968	30.3732	8.50618	11.7278	11.556	72.7837	44.3978	44.4057	9.99834	44.4194	44.3986	52.995	44.4217	18.8406	14.8995	40.7395	58.092	3.62298	3.62419	1.85551	1.85503	67.204	67.2141	68.9022	68.9075
Upper quartile	Income category	UMC	2.7089e+09	0.181168	11.9558	44.4802	0.31451	89.5885	0.404275	29.035	70.4731	39.8478	58.5281	2.90653	4.24426	19.6199	0.105389	32.5967	17.5182	11.3283	11.9558	50.1794	30.66	8.75553	11.9005	11.6449	72.8019	44.4777	44.4802	10.0879	44.6094	44.4959	53.6711	44.9975	18.8849	14.9348	41.2254	58.7991	3.69729	3.69984	1.95648	1.95361	67.4354	67.4361	69.3161	69.3108
Max	Income category	UMC	2.7089e+09	0.181168	12.2787	44.8547	0.319641	90.0557	0.420082	29.9546	71.3837	42.3811	60.4757	3.6838	5.2576	22.1673	0.122754	33.7876	17.5985	11.652	12.2787	51.153	32.0538	9.6244	12.8384	12.0997	72.8657	44.9098	44.8547	10.6034	45.7158	45.0815	57.2585	47.5816	19.1662	15.1099	43.0036	61.5923	4.03063	4.09326	2.42017	2.41088	68.8432	68.5474	71.3633	71.4724
Mean	UN Region	Africa	1.36033e+09	0.224168	9.73871	41.9944	1.02574	57.9845	0.845988	14.4978	12.3753	97.7031	0.724874	1.57207	0.672127	19.1217	0.102743	62.0398	17.4987	10.0442	9.73871	50.0041	30.3886	8.51824	10.221	9.35142	72.7829	41.8083	41.9944	9.9961	42.1266	41.6318	53.0057	47.516	18.8397	14.9016	40.7645	58.086	28.4172	28.4172	0.0981014	0.104865	36.9927	36.9759	62.5868	63.9297
Min	UN Region	Africa	1.36033e+09	0.224168	9.01292	40.3018	0.991146	56.1486	0.789636	13.424	11.3827	96.9949	0.660363	1.28855	0.488218	16.7019	0.0886981	59.2827	17.3634	9.22976	9.01292	49.0299	28.3515	4.95549	9.09784	8.72774	72.6377	40.0315	40.3018	9.38274	40.0709	39.8908	48.2825	32.2579	18.5306	14.6351	33.7233	48.3119	24.3302	24.2606	0.0069528	0.0108026	33.7899	33.5215	12.704	27.3056
Lower quartile	UN Region	Africa	1.36033e+09	0.224168	9.62281	41.7295	1.01894	57.6702	0.835281	14.2563	12.1801	97.6354	0.712088	1.49759	0.594333	18.5786	0.099777	61.4615	17.4726	9.85593	9.62281	49.8302	30.0256	7.60095	9.9801	9.21407	72.7546	41.4952	41.7295	9.90944	41.7267	41.3707	52.1873	44.9409	18.787	14.8581	39.0367	55.4023	27.7937	27.7642	0.0612376	0.0661263	36.4527	36.4111	58.0053	59.7636
Median	UN Region	Africa	1.36033e+09	0.224168	9.73168	41.9992	1.02536	57.9808	0.845643	14.4859	12.3784	97.7134	0.72494	1.55999	0.656251	19.0907	0.102549	62.0458	17.4989	10.0476	9.73168	50.0024	30.403	8.52881	10.2061	9.35502	72.7828	41.8008	41.9992	9.99703	42.1215	41.6305	53.0324	47.5831	18.8393	14.9018	40.7818	58.0987	28.4172	28.4327	0.0859059	0.0911492	36.9907	36.9737	63.6145	64.6768
Upper quartile	UN Region	Africa	1.36033e+09	0.224168	9.85164	42.2505	1.03229	58.2985	0.856151	14.7298	12.5683	97.7841	0.737824	1.63268	0.732466	19.6496	0.105501	62.6011	17.5253	10.2303	9.85164	50.183	30.7551	9.44028	10.4435	9.48168	72.8115	42.1252	42.2505	10.0857	42.5121	41.8942	53.8728	50.2025	18.8945	14.9442	42.4888	60.6983	29.0463	29.0958	0.117678	0.126448	37.5346	37.5302	68.3523	68.8641
Max	UN Region	Africa	1.36033e+09	0.224168	10.597	44.7761	1.06352	59.8821	0.907479	15.8834	13.3358	98.035	0.787239	2.2332	1.1513	22.2631	0.120484	64.8336	17.652	10.8468	10.597	51.2509	32.0157	12.2576	11.8636	9.96351	72.9338	43.5063	44.7761	10.533	44.231	43.0727	57.6798	60.36	19.1353	15.192	47.6207	69.0065	32.429	31.6972	1.01922	1.12496	39.9038	40.6106	82.3361	83.175
Mean	UN Region	Americas	1.02486e+09	0.204086	11.4466	47.3933	0.202697	92.9839	0.196315	21.9151	90.4986	92.5945	3.78901	3.61654	81.0471	19.1005	0.102757	37.122	17.4999	10.9334	11.4466	49.9996	30.0895	8.49917	11.5554	11.2548	72.7827	44.1362	47.3933	9.99848	43.905	43.8041	53.0138	61.2059	18.8383	14.8998	40.7402	58.0804	5.31024	5.31564	0.0305588	0.0592868	58.4604	58.4495	68.4353	69.0697
Min	UN Region	Americas	1.02486e+09	0.204086	11.1127	46.5667	0.195495	92.5199	0.186921	20.3286	89.7924	87.5121	1.57832	1.74816	78.0338	16.2523	0.0876783	35.2957	17.4147	10.5094	11.1127	48.899	27.3138	8.10008	10.5079	10.7523	72.6875	43.3788	46.5667	9.34267	40.7187	42.0596	46.2599	58.5484	18.3987	14.4517	40.0151	56.9166	4.12235	3.9526	0.0249324	0.0482317	51.4616	52.6513	64.8099	65.6419
Lower quartile	UN Region	Americas	1.02486e+09	0.204086	11.3843	47.2744	0.201282	92.9065	0.194297	21.5668	90.392	91.8924	3.1519	3.07414	80.5718	18.4704	0.0993373	36.8028	17.4818	10.8598	11.3843	49.7886	29.6277	8.43249	11.3594	11.1577	72.764	44.0065	47.2744	9.88741	43.5788	43.5181	51.923	60.8381	18.7698	14.8455	40.6086	57.8913	5.11401	5.11414	0.0292705	0.0568398	57.8557	57.8226	67.8989	68.5833
Median	UN Region	Americas	1.02486e+09	0.204086	11.4452	47.3971	0.202707	92.9847	0.196295	21.9053	90.4977	92.6592	3.70574	3.54477	81.0656	19.0605	0.102486	37.1225	17.4998	10.9317	11.4452	50.0035	30.0993	8.49965	11.5467	11.2519	72.7831	44.1369	47.3971	9.9997	43.9248	43.8043	53.0099	61.203	18.838	14.9008	40.7389	58.0818	5.3117	5.32024	0.0304827	0.0592187	58.545	58.5475	68.4596	69.0824
Upper quartile	UN Region	Americas	1.02486e+09	0.204086	11.5083	47.5185	0.204121	93.0638	0.198312	22.266	90.6091	93.3858	4.33249	4.06889	81.5349	19.6918	0.105935	37.4418	17.5181	11.0039	11.5083	50.2094	30.5522	8.56583	11.749	11.3485	72.802	44.2675	47.5185	10.1081	44.2401	44.0875	54.1015	61.571	18.9081	14.9544	40.8708	58.2696	5.50935	5.52342	0.0317872	0.0616726	59.1533	59.1678	68.9894	69.5777
Max	UN Region	Americas	1.02486e+09	0.204086	11.7772	48.0998	0.210384	93.4014	0.207359	24.1906	91.0511	96.0711	7.87719	7.70587	83.9291	22.6314	0.122252	38.7128	17.5971	11.3621	11.7772	51.1187	32.4895	8.85429	12.9172	11.8402	72.8927	44.9	48.0998	10.5451	46.1269	45.5385	60.1314	63.463	19.2581	15.2973	41.4925	59.2467	6.33993	6.59927	0.0376254	0.0723725	61.2631	61.5746	71.0341	71.5382
Mean	UN Region	Asia	4.6357e+09	0.181728	11.1585	42.912	0.472371	84.8867	0.553799	31.3975	43.7803	44.1688	50.7837	5.04748	14.7307	19.0972	0.102663	51.9764	17.5008	10.8115	11.1585	50.0004	30.3476	8.49561	10.8621	10.6146	72.7834	42.5907	42.912	9.99913	42.2607	42.1044	52.9899	60.9313	18.8417	14.9006	40.7489	58.073	9.87446	9.87742	0.0802686	0.159773	46.3616	46.3391	62.1936	61.8374
Min	UN Region	Asia	4.6357e+09	0.181728	10.7981	42.1886	0.459261	84.1657	0.532948	30.2249	42.2999	41.7685	48.3038	4.18554	12.4838	17.218	0.0948445	49.4952	17.3937	10.38	10.7981	49.5051	29.2183	7.67556	10.2534	10.0837	72.6924	41.2791	42.1886	9.74453	40.5176	40.6569	50.0959	54.6581	18.6278	14.6688	38.9875	55.6574	8.78597	8.95145	0.0471662	0.106973	42.5824	43.4624	53.2366	55.1022
Lower quartile	UN Region	Asia	4.6357e+09	0.181728	11.0954	42.7704	0.470336	84.7571	0.549967	31.1726	43.5464	43.6823	50.2968	4.83605	14.1875	18.8175	0.101143	51.5409	17.485	10.7225	11.0954	49.9047	30.123	8.32226	10.7476	10.5192	72.7674	42.3926	42.7704	9.95127	41.9743	41.8742	52.466	59.9904	18.8073	14.8732	40.4201	57.6075	9.67805	9.67935	0.0727216	0.145275	45.7981	45.7441	61.0379	60.6837
Median	UN Region	Asia	4.6357e+09	0.181728	11.1577	42.9132	0.472381	84.8878	0.553762	31.399	43.7802	44.1648	50.7887	5.02282	14.6916	19.0951	0.102644	51.9629	17.5012	10.8106	11.1577	50.0028	30.3486	8.49819	10.8583	10.6115	72.7834	42.59	42.9132	9.99862	42.2407	42.1017	52.9794	60.933	18.8411	14.901	40.745	58.0668	9.87121	9.88143	0.0795937	0.158675	46.3653	46.3407	62.2045	61.8361
Upper quartile	UN Region	Asia	4.6357e+09	0.181728	11.2214	43.0528	0.474402	85.0143	0.557752	31.624	44.0209	44.6457	51.2616	5.23641	15.2427	19.3636	0.104122	52.4055	17.517	10.8953	11.2214	50.0952	30.5739	8.6659	10.9736	10.7067	72.8001	42.791	43.0528	10.0487	42.5302	42.3348	53.5142	61.8433	18.8761	14.9278	41.0734	58.5488	10.0714	10.0722	0.0871326	0.172727	46.9575	46.9488	63.403	63.0166
Max	UN Region	Asia	4.6357e+09	0.181728	11.5119	43.6877	0.484637	85.5877	0.576187	33.0658	44.9895	46.89	53.3405	6.33127	17.66	20.5882	0.110777	54.3063	17.5853	11.3061	11.5119	50.5189	31.6341	9.34536	11.5613	11.127	72.8712	43.6875	43.6877	10.2511	44.5016	43.4416	56.523	65.6532	19.0793	15.0667	42.7497	60.7032	10.9614	10.9205	0.127943	0.244095	49.913	49.224	68.5032	68.9618
Mean	UN Region	Europe	7.43843e+08	0.273988	10.8973	49.9446	0.162788	96.5567	0.183199	33.0748	72.4636	53.7133	39.3655	6.92126	88.9456	19.1167	0.102502	34.6597	17.5004	9.99375	10.8973	49.9974	29.506	8.50024	10.962	10.0748	72.7837	44.1974	49.9446	9.99792	43.9617	43.9999	52.9482	61.5895	18.8438	14.9005	40.7398	58.0773	5.30312	5.29917	0.0216495	0.0413745	62.9643	62.9638	66.1123	67.7333
Min	UN Region	Europe	7.43843e+08	0.273988	10.5231	49.0045	0.158662	96.3706	0.174371	31.1784	71.0933	50.7686	35.802	5.64282	86.5246	15.5889	0.0847041	33.1158	17.3906	9.49272	10.5231	47.7762	24.9126	8.20853	9.91828	9.59036	72.6662	43.5384	49.0045	8.85413	41.6078	43.045	42.2779	60.0902	17.8264	14.0588	40.0505	57.2135	3.63893	3.45415	0.0176817	0.032853	60.3275	60.3939	61.4504	64.7087
Lower quartile	UN Region	Europe	7.43843e+08	0.273988	10.8227	49.7784	0.161915	96.524	0.181256	32.7039	72.231	53.1093	38.7221	6.67296	88.584	18.0715	0.096857	34.3732	17.4803	9.90668	10.8227	49.7053	28.8617	8.44806	10.7778	9.98357	72.7625	44.0741	49.7784	9.85725	43.5793	43.8385	51.3658	61.3028	18.7477	14.8286	40.6372	57.9334	5.0651	5.04565	0.0206907	0.0394738	62.5238	62.514	65.4575	67.1921
Median	UN Region	Europe	7.43843e+08	0.273988	10.8956	49.9483	0.162769	96.5581	0.183059	33.0649	72.4672	53.7245	39.3654	6.91162	89.0002	18.9596	0.101579	34.6555	17.5005	9.99513	10.8956	49.9964	29.4948	8.50037	10.9653	10.0735	72.7838	44.2005	49.9483	9.99982	43.9503	43.9957	52.9284	61.5863	18.8426	14.9008	40.7398	58.0758	5.33897	5.33655	0.0215923	0.0412765	62.9644	62.9753	66.1338	67.7244
Upper quartile	UN Region	Europe	7.43843e+08	0.273988	10.9696	50.1167	0.163622	96.5894	0.185086	33.4378	72.695	54.336	40.0153	7.16611	89.3642	20.0237	0.107285	34.9423	17.5203	10.0813	10.9696	50.2799	30.1405	8.55303	11.1481	10.1629	72.8046	44.316	50.1167	10.1485	44.3254	44.1629	54.5204	61.8727	18.9358	14.9723	40.843	58.2248	5.58715	5.60013	0.0225592	0.0431671	63.4116	63.4228	66.7882	68.2955
Max	UN Region	Europe	7.43843e+08	0.273988	11.3178	50.8287	0.167727	96.7219	0.195997	35.3815	73.6575	56.9528	42.7008	8.23792	90.6835	25.083	0.138195	36.5896	17.609	10.5456	11.3178	51.945	34.1041	8.77523	11.8794	10.7744	72.9003	44.8397	50.8287	11.0816	47.6347	44.9733	62.6109	63.3606	19.6188	15.4907	41.3077	58.8108	6.41192	6.54559	0.0272748	0.0527245	65.5457	65.321	69.0767	70.4316
Mean	UN Region	NA	2.57939e+07	0.306549	12.5625	55.2317	0.0614706	99.3603	0.0653252	29.1475	94.8252	65.4175	34.5455	0.0370204	97.3997	19.0728	0.102786	31.4072	17.4983	11.7608	12.5625	49.9939	23.5842	8.50397	12.4345	11.972	72.7848	44.4879	55.2317	10.0008	44.4114	44.7398	52.883	61.6409	18.8408	14.9013	40.7472	58.0286	5.42671	5.44463	0.000423722	0.000437987	68.4406	68.438	47.1766	48.3669
Min	UN Region	NA	2.57939e+07	0.306549	9.446	47.7014	0.0411694	99.0109	0.0424366	7.44048	90.2604	19.0771	0	0	91.3554	8.54831	0.0458836	23.0857	16.5309	8.22384	9.446	45.5933	13.3546	6.40844	7.59254	8.34762	71.8336	40.7619	47.7014	7.65738	38.9406	40.9071	27.1627	46.7339	16.8069	13.2302	36.5982	52.0047	2.03489	1.86616	0	0	54.2971	57.6671	1.20643	1.20643
Lower quartile	UN Region	NA	2.57939e+07	0.306549	11.926	53.8623	0.057456	99.3065	0.059727	23.1003	94.2998	52.9246	21.519	0	96.9628	16.7206	0.0894568	29.7199	17.3234	11.0566	11.926	49.2231	21.6032	8.09316	11.6256	11.2797	72.6125	43.8323	53.8623	9.60454	43.5831	44.0028	47.6926	59.4015	18.5218	14.629	39.9164	56.8394	4.61557	4.61181	8.19897e-06	1.47491e-05	66.2705	66.1396	27.0487	28.4233
Median	UN Region	NA	2.57939e+07	0.306549	12.55	55.1859	0.061323	99.3661	0.0648486	28.4275	94.9185	65.1932	34.7575	0	97.5424	18.8582	0.101815	31.4354	17.4978	11.741	12.55	49.9919	23.4324	8.49807	12.4451	11.9594	72.7845	44.5016	55.1859	10.0095	44.427	44.7333	52.8734	61.6592	18.8386	14.906	40.7412	58.0292	5.40151	5.40838	0.000153627	0.000182466	68.447	68.475	45.9748	47.5742
Upper quartile	UN Region	NA	2.57939e+07	0.306549	13.1707	56.5374	0.0652247	99.4174	0.0705838	34.4339	95.4664	78.4352	47.0222	0.00835286	97.9892	21.2277	0.114578	33.041	17.6772	12.4524	13.1707	50.7743	25.4953	8.91882	13.2224	12.6679	72.9604	45.1405	56.5374	10.3836	45.2357	45.4613	58.3314	63.8746	19.1678	15.1673	41.5839	59.2085	6.1865	6.22996	0.000571405	0.000584458	70.6286	70.6948	65.7853	67.9104
Max	UN Region	NA	2.57939e+07	0.306549	15.8591	63.9754	0.081708	99.5975	0.101346	63.357	97.0088	100	80.9229	1.84097	98.9286	33.7647	0.180801	39.1129	18.4133	15.6358	15.8591	53.909	33.6032	10.7422	17.3682	15.8495	73.7512	48.0942	63.9754	12.2043	49.3552	48.8388	81.5343	74.3833	20.9765	16.3598	45.2588	64.3026	9.79369	10.4089	0.00998042	0.0114574	78.455	80.1828	93.3918	93.3918
Mean	UN Region	Oceania	4.37954e+07	0.207348	10.9259	49.2258	0.214956	93.8408	0.126865	26.9204	93.5125	89.8252	0	10.1748	95.9412	19.1566	0.102793	53.5731	17.4996	10.6928	10.9259	49.9994	28.0693	8.49569	11.3099	10.8585	72.7791	42.0055	49.2258	10.0062	41.7942	41.8636	52.9251	61.6789	18.838	14.8944	40.7294	58.089	33.1545	33.1676	0.00120826	0.00245952	45.1051	45.0713	50.1277	50.1463
Min	UN Region	Oceania	4.37954e+07	0.207348	9.26143	43.547	0.18905	92.6049	0.102192	22.7002	92.1252	82.0684	0	5.03972	94.2002	13.7571	0.0709962	44.4039	17.0978	8.67456	9.26143	47.3947	20.1973	7.74133	8.73426	8.12698	72.3466	36.2889	43.547	8.83771	32.0917	35.1365	35.7858	58.3216	17.6819	13.9209	39.5725	56.0878	18.6418	19.4862	0.00022806	0.000495793	25.2893	25.4967	8.2392	7.76429
Lower quartile	UN Region	Oceania	4.37954e+07	0.207348	10.6125	48.4378	0.209347	93.6264	0.122294	26.0757	93.2268	88.7904	0	9.05571	95.6586	17.8453	0.0956626	51.6653	17.4261	10.2123	10.6125	49.5625	26.7992	8.38545	10.7182	10.3738	72.7005	40.9535	48.4378	9.78068	40.4201	40.7505	49.6175	61.0632	18.6349	14.729	40.5133	57.763	30.9561	30.8855	0.000890808	0.00192726	42.1396	41.9379	36.3862	35.338
Median	UN Region	Oceania	4.37954e+07	0.207348	10.9135	49.2771	0.214776	93.85	0.126698	26.9092	93.5249	89.9032	0	10.0968	95.9689	19.1	0.102394	53.6119	17.5008	10.6681	10.9135	50.0039	28.0672	8.49763	11.31	10.8349	72.7782	42.0175	49.2771	9.99983	41.7678	41.8585	52.8621	61.6811	18.8456	14.8942	40.7284	58.0867	33.2089	33.2326	0.00111886	0.00235049	45.05	45.1361	50.3891	50.634
Upper quartile	UN Region	Oceania	4.37954e+07	0.207348	11.2363	50.0549	0.220235	94.0655	0.131239	27.7553	93.8036	90.9443	0	11.2096	96.2474	20.3846	0.109313	55.4294	17.573	11.152	11.2363	50.4452	29.3436	8.60766	11.8657	11.3183	72.8582	43.03	50.0549	10.232	43.1821	42.9978	56.0424	62.2723	19.0431	15.0561	40.9497	58.4112	35.3958	35.63	0.00141838	0.00288573	48.3258	48.2022	64.5138	65.2927
Max	UN Region	Oceania	4.37954e+07	0.207348	12.4631	53.6843	0.242914	94.9335	0.150495	30.883	94.9609	94.9603	0	17.9316	97.1441	26.1848	0.144777	64.8343	17.8894	13.4437	12.4631	52.2247	34.8537	9.04864	14.9843	13.6688	73.1531	47.8039	53.6843	11.3916	50.4518	48.9675	70.6235	65.228	19.9582	15.8781	41.9896	59.7688	43.4111	44.9032	0.00644322	0.00870143	61.2991	61.3957	86.0161	86.5143
Mean	UN Subregion	Australia and New Zealand	3.06784e+07	0.475391	10.5467	61.6777	0.0633694	99.9966	0.0499862	28.6325	99.9998	89.3639	0	10.6361	99.6664	19.1323	0.10252	17.7924	17.5021	9.19025	10.5467	49.8527	2.29709	8.49622	9.19115	9.18518	72.7836	44.4907	61.6777	10.0059	44.4869	44.4899	53.0246	61.6803	18.8466	14.9024	40.7294	58.0882	0	0	0.000107053	0.000215586			82.3677	82.3639
Min	UN Subregion	Australia and New Zealand	3.06784e+07	0.475391	9.39946	58.4822	0.056867	99.9885	0.0419649	23.9603	99.9988	81.4133	0	5.27577	99.5752	0.11732	0.00670421	6.72839	17.0577	0.185584	9.39946	41.026	1.90018	7.74164	0.0263219	0.25285	72.3846	32.3004	58.4822	5.4607	32.7974	32.273	41.7416	58.2904	18.0894	14.2852	39.5639	56.0229	0	0	0	0			71.1027	71.1027
Lower quartile	UN Subregion	Australia and New Zealand	3.06784e+07	0.475391	10.3223	61.1152	0.0619585	99.9956	0.0483638	27.7017	99.9998	88.2914	0	9.46862	99.651	10.6421	0.055631	13.1727	17.4245	5.25254	10.3223	47.3924	2.22391	8.38279	5.19251	5.26049	72.7033	42.2537	61.1152	8.81401	42.1787	42.2814	50.732	61.0592	18.7079	14.7924	40.513	57.7634	0	0	3.07498e-06	6.11928e-06			77.1117	77.1335
Median	UN Subregion	Australia and New Zealand	3.06784e+07	0.475391	10.5391	61.6823	0.0633683	99.997	0.0499237	28.6218	99.9999	89.4473	0	10.5527	99.6673	17.2018	0.0914556	17.7943	17.5032	8.23043	10.5391	49.8116	2.29773	8.49791	8.17718	8.22533	72.7838	44.5223	61.6823	9.98116	44.4957	44.4955	53.0442	61.688	18.8423	14.9031	40.729	58.0811	0	0	3.3555e-05	6.72607e-05			82.3853	82.3525
Upper quartile	UN Subregion	Australia and New Zealand	3.06784e+07	0.475391	10.7704	62.239	0.064795	99.9979	0.0515443	29.5778	99.9999	90.5314	0	11.7086	99.6823	26.2025	0.13796	22.514	17.5807	12.0711	10.7704	52.3104	2.37109	8.60962	12.0318	12.041	72.8649	46.7501	62.239	11.2194	46.7526	46.7486	55.285	62.2862	18.98	15.0118	40.952	58.4163	0	0	0.000131283	0.000267441			87.6383	87.6513
Max	UN Subregion	Australia and New Zealand	3.06784e+07	0.475391	11.9278	64.8327	0.0718687	99.9999	0.059104	32.8452	100	94.7242	0	18.5867	99.7441	66.1754	0.372879	28.8333	17.9517	49.4965	11.9278	59.5093	2.70153	9.04822	48.8291	51.7304	73.203	55.7937	64.8327	14.5704	56.2098	56.035	64.3305	65.2146	19.6294	15.6193	42.0131	59.7543	0	0	0.00165737	0.00364316			93.3912	93.3912
Mean	UN Subregion	Central Asia	7.47146e+07	0.280626	11.28	42.5605	0.608781	76.4529	0.839947	12.2219	5.38261	98.8972	0	1.1028	9.35945	19.0961	0.102735	50.3335	17.5003	10.9884	11.28	50.0054	30.3711	8.50494	11.5427	11.0276	72.7825	42.7332	42.5605	10.0002	42.9171	42.2477	53.0382	44.3895	18.8406	14.8989	40.7151	58.0797	13.6306	13.6455	3.28483	3.27911	47.4856	47.5159	69.1887	69.1743
Min	UN Subregion	Central Asia	7.47146e+07	0.280626	9.71689	39.2001	0.557759	71.7082	0.739008	9.98763	4.76654	97.0344	0	0.752957	5.9872	15.194	0.0801711	42.8236	17.1474	8.71229	9.71689	48.1886	25.4285	5.98381	9.58627	8.7809	72.3623	37.5985	39.2001	9.20249	38.0388	36.8081	42.9548	37.3598	18.0353	14.1537	35.8915	50.3542	9.32538	8.75397	1.48103	1.61995	33.4633	29.9482	58.6686	58.5694
Lower quartile	UN Subregion	Central Asia	7.47146e+07	0.280626	10.9692	41.9388	0.597499	75.6128	0.816234	11.7327	5.25879	98.8628	0	0.899773	8.5274	18.2134	0.0979108	48.6071	17.4257	10.6202	10.9692	49.7036	29.5393	8.01458	11.1618	10.6456	72.7054	42.0046	41.9388	9.84473	42.2737	41.4167	51.0449	43.2233	18.7206	14.7997	39.7759	56.7593	12.6696	12.6647	2.82001	2.81085	45.4385	45.4523	67.3615	67.3306
Median	UN Subregion	Central Asia	7.47146e+07	0.280626	11.2681	42.5758	0.608149	76.4865	0.839179	12.1985	5.38324	99.0432	0	0.956843	9.29245	19.0599	0.102632	50.2802	17.5024	10.9697	11.2681	50.0047	30.3652	8.512	11.5381	10.9984	72.7846	42.7309	42.5758	9.99519	42.9222	42.2666	53.0346	44.367	18.8409	14.8968	40.7361	58.1172	13.6023	13.6001	3.22496	3.23952	47.565	47.6102	69.2145	69.2257
Upper quartile	UN Subregion	Central Asia	7.47146e+07	0.280626	11.5808	43.1641	0.619341	77.3361	0.86285	12.7	5.50484	99.1002	0	1.1372	10.123	19.9362	0.107431	52.0328	17.5765	11.3462	11.5808	50.3073	31.2044	8.98538	11.9076	11.4095	72.8616	43.4724	43.1641	10.1559	43.5772	43.1157	55.0405	45.5388	18.9629	14.9994	41.6517	59.3651	14.5532	14.5943	3.70296	3.68747	49.6687	49.5518	71.0891	71.0453
Max	UN Subregion	Central Asia	7.47146e+07	0.280626	13.3263	47.0522	0.675941	80.5621	0.979015	14.5854	5.95167	99.247	0	2.96557	14.8433	24.1127	0.128667	60.2045	17.8824	13.7244	13.3263	51.8743	35.4968	10.7603	14.4632	13.7471	73.2868	48.8827	47.0522	10.9419	47.6738	48.6612	63.2459	52.0949	19.6329	15.3835	46.0286	65.2909	19.2362	19.2543	6.17344	6.21406	58.6735	61.5243	78.3794	78.6431
Mean	UN Subregion	Eastern Asia	1.63733e+09	0.16017	12.0843	44.6024	0.2742	94.6244	0.371874	54.6924	97.2984	26.8265	70.6663	2.50725	26.7408	19.0444	0.102743	36.8089	17.502	11.45	12.0843	49.9917	30.316	8.4929	11.6156	11.4419	72.784	44.2639	44.6024	9.99706	42.1881	43.9457	53.0026	61.7116	18.8414	14.9003	40.7439	58.0771	3.20192	3.20292	5.00082e-05	0.000100818	63.2126	63.2185	65.8613	65.8595
Min	UN Subregion	Eastern Asia	1.63733e+09	0.16017	11.4169	43.5262	0.263284	94.2423	0.348011	52.8322	96.3934	24.4403	67.3447	1.73866	21.8722	13.0539	0.0692105	35.0433	17.3447	10.798	11.4169	46.783	27.9508	7.54212	7.80088	10.6175	72.5843	43.1116	43.5262	8.50954	30.8056	41.0106	46.6262	54.9527	18.4175	14.5361	38.7752	55.329	2.65235	2.5502	0	0	58.5764	58.4115	38.2136	38.2136
Lower quartile	UN Subregion	Eastern Asia	1.63733e+09	0.16017	11.9612	44.4531	0.271995	94.5573	0.366687	54.2975	97.1607	26.2946	70.1612	2.25536	25.7058	17.5032	0.0944641	36.4263	17.4707	11.3392	11.9612	49.5477	29.9041	8.29256	11.0258	11.3036	72.7512	44.1507	44.4531	9.77706	40.8043	43.7359	52.0012	60.6553	18.7782	14.8501	40.3602	57.5111	3.10772	3.10606	9.45575e-08	1.80172e-07	62.8023	62.8176	57.8441	57.8172
Median	UN Subregion	Eastern Asia	1.63733e+09	0.16017	12.0858	44.6094	0.274236	94.6278	0.371722	54.6756	97.3116	26.8104	70.6845	2.4408	26.6811	18.814	0.101562	36.7855	17.5016	11.4516	12.0858	49.9935	30.3106	8.49862	11.5911	11.4366	72.7836	44.2645	44.6094	9.99758	42.2348	43.9566	53.006	61.6979	18.8399	14.9014	40.7423	58.0643	3.20764	3.20528	8.6172e-06	1.71314e-05	63.2706	63.2757	66.548	66.4934
Upper quartile	UN Subregion	Eastern Asia	1.63733e+09	0.16017	12.2023	44.7569	0.276417	94.6958	0.377098	55.0802	97.4466	27.3396	71.2066	2.70834	27.6934	20.3512	0.109577	37.1494	17.5331	11.5609	12.2023	50.4377	30.7272	8.69539	12.1836	11.5777	72.818	44.3839	44.7569	10.2126	43.6143	44.1632	53.9822	62.787	18.9047	14.9488	41.1208	58.6529	3.29948	3.30559	5.38645e-05	0.000110747	63.6861	63.7133	74.8785	74.8745
Max	UN Subregion	Eastern Asia	1.63733e+09	0.16017	12.7804	46.0787	0.285239	94.9424	0.402869	56.8345	97.8479	29.7067	73.1016	4.06722	31.7603	28.9574	0.157927	39.5941	17.6681	12.0393	12.7804	53.3479	32.7896	9.47176	15.5302	12.497	72.9712	46.112	46.0787	11.6259	54.0938	46.2801	58.9767	67.5352	19.4114	15.2621	43.0245	60.886	3.73945	3.7984	0.001011	0.00177675	65.9981	65.779	89.7067	89.7067
Mean	UN Subregion	Eastern Europe	2.92537e+08	0.358258	10.3975	45.3243	0.310539	91.1227	0.395815	10.8176	38.843	90.9849	9.01505	5.54272e-05	43.718	19.119	0.102494	35.1111	17.5002	9.80992	10.3975	49.9992	30.2907	8.49975	10.8756	9.86	72.7833	44.1316	45.3243	9.99756	43.9366	43.8235	52.9586	60.495	18.8444	14.9003	40.7387	58.0883	5.21147	5.20822	0.237001	0.444491	62.5078	62.5072	67.981	68.73
Min	UN Subregion	Eastern Europe	2.92537e+08	0.358258	9.94813	44.2863	0.30115	90.6454	0.370346	9.64746	37.4527	86.8422	7.05513	0	37.2642	15.4027	0.0844867	33.4594	17.3235	9.30561	9.94813	47.7093	25.2997	7.93293	9.81872	9.37982	72.613	43.4182	44.2863	8.82787	41.5622	42.8115	41.6032	57.0096	17.7836	14.0211	39.8099	56.3713	3.48264	3.32741	0.177933	0.33237	59.5889	59.7071	63.4698	65.7475
Lower quartile	UN Subregion	Eastern Europe	2.92537e+08	0.358258	10.3054	45.1445	0.308555	91.0389	0.390418	10.557	38.5492	90.237	8.20621	0	42.4655	18.04	0.0967279	34.8363	17.4741	9.71659	10.3054	49.7025	29.5836	8.4151	10.681	9.76333	72.7555	44.0172	45.1445	9.85375	43.542	43.6603	51.3256	60.0501	18.7448	14.8256	40.5695	57.8559	4.96014	4.94352	0.223834	0.420411	62.0403	62.0334	67.402	68.2017
Median	UN Subregion	Eastern Europe	2.92537e+08	0.358258	10.396	45.3293	0.310488	91.1256	0.39545	10.8005	38.8465	91.2322	8.7678	0	43.7672	18.953	0.101515	35.1157	17.5008	9.80983	10.396	50.0026	30.2852	8.50038	10.8758	9.8598	72.7831	44.1325	45.3293	10.0013	43.9235	43.8193	52.9532	60.5007	18.8436	14.9001	40.736	58.0929	5.24608	5.24433	0.23653	0.443445	62.5111	62.5157	67.9952	68.731
Upper quartile	UN Subregion	Eastern Europe	2.92537e+08	0.358258	10.4878	45.5115	0.312523	91.2097	0.400896	11.0617	39.1282	91.7938	9.76299	0	44.964	20.0574	0.107333	35.3885	17.527	9.90366	10.4878	50.2872	30.9734	8.58342	11.0658	9.95064	72.8113	44.251	45.5115	10.1532	44.2985	43.9888	54.6085	60.9358	18.942	14.976	40.9057	58.323	5.50461	5.5233	0.249677	0.468131	62.9847	62.9959	68.5674	69.2526
Max	UN Subregion	Eastern Europe	2.92537e+08	0.358258	10.9093	46.3458	0.320604	91.5456	0.428387	12.3157	40.4527	92.9449	13.1578	0.00359741	50.3826	25.141	0.136361	37.1303	17.654	10.4113	10.9093	51.9768	35.144	9.01729	11.847	10.5704	72.9457	44.7774	46.3458	11.1123	47.6933	45.0061	62.9623	63.3692	19.6561	15.4969	41.6471	59.5722	6.34538	6.46875	0.308399	0.59102	65.1714	64.9347	70.7343	71.4325
Mean	UN Subregion	Latin America and the Caribbean	6.51326e+08	0.203582	11.5329	44.3391	0.329867	85.8592	0.350501	10.384	81.9016	95.9719	0	4.02809	16.4503	19.1005	0.102757	37.121	17.5001	10.9334	11.5329	49.9996	30.3467	8.4986	11.5554	11.2547	72.7826	44.1359	44.3391	9.99848	43.905	43.803	53.0138	51.1367	18.8383	14.8998	40.7426	58.0908	5.31397	5.31938	0.806623	1.03789	58.4604	58.4495	68.4418	69.073
Min	UN Subregion	Latin America and the Caribbean	6.51326e+08	0.203582	11.1471	43.5983	0.320096	85.1237	0.32865	9.345	80.9108	94.5011	0	3.36792	13.049	16.2523	0.0876783	35.2935	17.3992	10.5092	11.1471	48.899	27.5181	7.28716	10.5079	10.7526	72.6586	43.3786	43.5983	9.34267	40.7187	42.0569	46.2552	47.0534	18.3983	14.4514	38.5305	53.9735	4.1248	3.95464	0.586345	0.769768	51.4616	52.6513	64.8098	65.6444
Lower quartile	UN Subregion	Latin America and the Caribbean	6.51326e+08	0.203582	11.4614	44.2185	0.327945	85.7347	0.347005	10.1844	81.7447	95.878	0	3.86491	15.7066	18.4704	0.0993373	36.8013	17.4792	10.8598	11.4614	49.7886	29.8808	8.24837	11.3594	11.1579	72.7606	44.006	44.2185	9.88741	43.5788	43.5161	51.9207	50.2944	18.7698	14.8454	40.3096	57.3183	5.1174	5.11769	0.754661	0.972022	57.8557	57.8226	67.9035	68.586
Median	UN Subregion	Latin America and the Caribbean	6.51326e+08	0.203582	11.5313	44.3421	0.329868	85.8622	0.350398	10.3684	81.9033	96.0217	0	3.9783	16.3964	19.0605	0.102486	37.1214	17.5001	10.9316	11.5313	50.0035	30.36	8.497	11.5467	11.2517	72.7826	44.1367	44.3421	9.9997	43.9248	43.8029	53.01	51.1355	18.8379	14.9008	40.7273	58.099	5.31532	5.32369	0.804726	1.03546	58.545	58.5475	68.4645	69.0853
Upper quartile	UN Subregion	Latin America and the Caribbean	6.51326e+08	0.203582	11.6032	44.4611	0.331687	85.9846	0.353827	10.5683	82.0671	96.1351	0	4.12197	17.1247	19.6918	0.105935	37.4412	17.5212	11.0038	11.6032	50.2094	30.813	8.75713	11.749	11.3484	72.8053	44.2672	44.4611	10.1081	44.2401	44.0859	54.1017	51.9844	18.9082	14.9544	41.193	58.8643	5.51322	5.52736	0.854424	1.09899	59.1533	59.1678	68.9972	69.5798
Max	UN Subregion	Latin America and the Caribbean	6.51326e+08	0.203582	11.9058	45.0594	0.343595	86.4986	0.37149	11.8867	82.7111	96.6321	0	5.49894	20.1708	22.6314	0.122252	38.7109	17.6096	11.3618	11.9058	51.1187	32.772	9.73054	12.9172	11.8402	72.8992	44.9	45.0594	10.5451	46.1269	45.5375	60.1357	57.4384	19.2584	15.2978	43.2168	62.1018	6.34542	6.60469	1.12922	1.41056	61.2631	61.5746	71.0409	71.5404
Mean	UN Subregion	Melanesia	1.18931e+07	0.147822	10.9611	42.2382	1.15273	54.7402	0.963863	12.5187	34.8522	99.9959	0	0.00405388	9.56374	19.1344	0.102736	53.7237	17.4988	10.7079	10.9611	49.9968	30.3102	8.48368	11.2073	10.8847	72.7771	41.9793	42.2382	10.0052	41.7886	41.8504	52.925	61.8256	18.8385	14.8934	40.6857	58.2159	34.5289	34.5428	0.0402519	0.0404422	45.0162	44.9844	34.3377	34.302
Min	UN Subregion	Melanesia	1.18931e+07	0.147822	8.41432	35.0268	1.00998	48.1275	0.727482	7.52448	23.7746	99.9237	0	0	0	13.6349	0.0705697	44.0537	16.9246	8.61283	8.41432	47.1924	20.6624	4.52035	8.33893	8.07852	72.1913	35.883	35.0268	8.98137	31.0712	34.7279	35.2544	31.7537	17.6302	13.9005	33.1744	46.8344	18.8532	19.7714	0	0	25.9152	24.9714	1.20371	1.20371
Lower quartile	UN Subregion	Melanesia	1.18931e+07	0.147822	10.4429	41.0379	1.12425	53.4958	0.914501	11.1594	32.2569	100	0	0	1.55134	17.7653	0.0953619	51.7449	17.3965	10.1979	10.4429	49.5377	28.8412	7.40202	10.5553	10.3846	72.6685	40.9016	41.0379	9.77046	40.3243	40.6705	49.4178	56.5429	18.6215	14.7167	38.6107	55.372	32.1242	32.0386	0	0	41.9311	41.7704	18.6791	18.6791
Median	UN Subregion	Melanesia	1.18931e+07	0.147822	10.952	42.2346	1.15268	54.7217	0.961089	12.2959	34.8092	100	0	0	5.94447	19.0722	0.1023	53.7332	17.5004	10.6858	10.952	49.9967	30.3168	8.46524	11.1935	10.8596	72.776	41.9724	42.2346	9.9981	41.7689	41.8471	52.8554	61.903	18.8497	14.8921	40.6926	58.264	34.6319	34.6237	0	0	44.9787	45.093	34.3043	34.3298
Upper quartile	UN Subregion	Melanesia	1.18931e+07	0.147822	11.4709	43.4252	1.18155	55.9711	1.01256	13.6781	37.3584	100	0	0	15.3778	20.4151	0.109549	55.6544	17.5988	11.189	11.4709	50.4569	31.7797	9.54362	11.8207	11.3669	72.8841	43.0572	43.4252	10.2458	43.2434	43.0331	56.2657	67.2052	19.0504	15.0662	42.6933	61.0506	37.005	37.2793	0.0141273	0.0147924	48.2978	48.191	50.1021	49.9159
Max	UN Subregion	Melanesia	1.18931e+07	0.147822	13.5066	50.7923	1.29417	61.0568	1.26828	21.843	45.7846	100	0	0.0763105	47.2468	27.1724	0.145527	65.7097	17.9847	13.537	13.5066	52.2893	37.8454	12.6185	15.3697	13.8396	73.283	47.9969	50.7923	11.4727	53.0451	49.2632	71.5655	89.4101	20.0394	15.9012	48.1456	69.2194	45.9637	47.1397	1.36595	1.30248	61.1999	61.6271	66.688	66.688
Mean	UN Subregion	Micronesia	521059	0.201698	13.2507	48.925	0.396748	86.3489	0.282492	8.78055	88.9497	100	0	0	70.1467	19.1075	0.102222	49.0313	17.5029	10.0811	13.2507	49.9869	29.5625	8.50562	13.3854	9.58011	72.7736	42.7847	48.925	10.0317	41.8182	42.2795	52.7205	61.6835	18.8379	14.9128	40.7456	58.0311	31.1767	31.2512	0.0477501	0.0871223	48.4394	48.4355	70.6374	73.7026
Min	UN Subregion	Micronesia	521059	0.201698	8.33537	30.7321	0.303305	78.7482	0.130235	2.13814	80.1563	100	0	0	19.5686	2.04006	0.0150319	19.2506	15.7455	6.52361	8.33537	42.3236	9.48147	5.69138	4.56761	5.18445	71.0751	23.0253	30.7321	5.90326	15.3741	22.4847	13.8649	41.4767	16.1742	12.4398	35.8282	48.9958	12.8103	7.29195	0.000159842	0.000310773	7.61301	6.48271	10.0094	20.5738
Lower quartile	UN Subregion	Micronesia	521059	0.201698	12.2589	46.4714	0.371461	85.5233	0.249443	6.58194	88.1467	100	0	0	62.2469	13.3075	0.0711625	38.9208	17.1399	8.97585	12.2589	48.2551	25.0673	7.96158	10.6824	8.4333	72.3943	40.0894	46.4714	9.12718	37.0471	38.7993	41.3703	58.9891	18.2378	14.4032	39.7316	56.5641	26.8166	26.6441	0.0185985	0.0335766	36.1238	35.8814	64.4328	68.9616
Median	UN Subregion	Micronesia	521059	0.201698	13.2013	49.0286	0.392829	86.5595	0.280522	8.46726	89.1645	100	0	0	72.1948	18.0391	0.097008	48.9977	17.5118	9.77245	13.2013	49.9348	29.4476	8.498	13.0824	9.21797	72.7834	42.7698	49.0286	10.0281	41.8676	42.3143	52.8507	61.6378	18.8279	14.9081	40.7195	58.061	31.3088	31.4348	0.0345465	0.062392	49.0681	49.2335	73.5387	75.8633
Upper quartile	UN Subregion	Micronesia	521059	0.201698	14.1818	51.5308	0.417943	87.3784	0.312955	10.6363	89.9604	100	0	0	79.5535	24.0436	0.128094	59.176	17.8795	10.8901	14.1818	51.6965	33.8918	9.02844	15.8269	10.342	73.1683	45.48	51.5308	10.9583	46.4874	45.8919	64.1373	64.4257	19.4478	15.4188	41.7483	59.4755	35.5049	35.7757	0.0614271	0.110701	60.9336	61.316	79.4029	80.7092
Max	UN Subregion	Micronesia	521059	0.201698	20.7028	63.5194	0.584061	89.6406	0.554789	20.6178	92.2984	100	0	0	95.4335	52.9002	0.300498	79.9523	19.0611	23.2555	20.7028	57.0556	50.6901	11.2712	25.29	22.5746	74.5181	59.8644	63.5194	13.7457	73.6167	63.8261	92.3438	79.9083	21.7306	17.1223	46.5621	66.0817	58.8699	56.6122	0.599083	1.31457	83.1329	82.6619	93.1952	93.1952
Mean	UN Subregion	NA	2.57939e+07	0.306549	12.5625	55.2317	0.0614706	99.3603	0.0653252	29.1475	94.8252	65.4175	34.5455	0.0370204	97.3997	19.0728	0.102786	31.4072	17.4983	11.7608	12.5625	49.9939	23.5842	8.50397	12.4345	11.972	72.7848	44.4879	55.2317	10.0008	44.4114	44.7398	52.883	61.6409	18.8408	14.9013	40.7472	58.0286	5.42671	5.44463	0.000423722	0.000437987	68.4406	68.438	47.1766	48.3669
Min	UN Subregion	NA	2.57939e+07	0.306549	9.446	47.7014	0.0411694	99.0109	0.0424366	7.44048	90.2604	19.0771	0	0	91.3554	8.54831	0.0458836	23.0857	16.5309	8.22384	9.446	45.5933	13.3546	6.40844	7.59254	8.34762	71.8336	40.7619	47.7014	7.65738	38.9406	40.9071	27.1627	46.7339	16.8069	13.2302	36.5982	52.0047	2.03489	1.86616	0	0	54.2971	57.6671	1.20643	1.20643
Lower quartile	UN Subregion	NA	2.57939e+07	0.306549	11.926	53.8623	0.057456	99.3065	0.059727	23.1003	94.2998	52.9246	21.519	0	96.9628	16.7206	0.0894568	29.7199	17.3234	11.0566	11.926	49.2231	21.6032	8.09316	11.6256	11.2797	72.6125	43.8323	53.8623	9.60454	43.5831	44.0028	47.6926	59.4015	18.5218	14.629	39.9164	56.8394	4.61557	4.61181	8.19897e-06	1.47491e-05	66.2705	66.1396	27.0487	28.4233
Median	UN Subregion	NA	2.57939e+07	0.306549	12.55	55.1859	0.061323	99.3661	0.0648486	28.4275	94.9185	65.1932	34.7575	0	97.5424	18.8582	0.101815	31.4354	17.4978	11.741	12.55	49.9919	23.4324	8.49807	12.4451	11.9594	72.7845	44.5016	55.1859	10.0095	44.427	44.7333	52.8734	61.6592	18.8386	14.906	40.7412	58.0292	5.40151	5.40838	0.000153627	0.000182466	68.447	68.475	45.9748	47.5742
Upper quartile	UN Subregion	NA	2.57939e+07	0.306549	13.1707	56.5374	0.0652247	99.4174	0.0705838	34.4339	95.4664	78.4352	47.0222	0.00835286	97.9892	21.2277	0.114578	33.041	17.6772	12.4524	13.1707	50.7743	25.4953	8.91882	13.2224	12.6679	72.9604	45.1405	56.5374	10.3836	45.2357	45.4613	58.3314	63.8746	19.1678	15.1673	41.5839	59.2085	6.1865	6.22996	0.000571405	0.000584458	70.6286	70.6948	65.7853	67.9104
Max	UN Subregion	NA	2.57939e+07	0.306549	15.8591	63.9754	0.081708	99.5975	0.101346	63.357	97.0088	100	80.9229	1.84097	98.9286	33.7647	0.180801	39.1129	18.4133	15.6358	15.8591	53.909	33.6032	10.7422	17.3682	15.8495	73.7512	48.0942	63.9754	12.2043	49.3552	48.8388	81.5343	74.3833	20.9765	16.3598	45.2588	64.3026	9.79369	10.4089	0.00998042	0.0114574	78.455	80.1828	93.3918	93.3918
Mean	UN Subregion	Northern Africa	2.51331e+08	0.100412	10.3765	41.7879	0.433521	83.7356	0.615081	10.5387	15.8474	98.7563	0	1.24373	0.00932309	19.1203	0.102849	53.1411	17.4985	9.92642	10.3765	50.006	30.4028	8.53697	9.92387	9.54831	72.7847	41.5853	41.7879	9.99306	42.1616	41.0285	53.026	44.5065	18.8372	14.9019	40.757	58.1131	7.18135	7.18323	8.09455	8.08432	47.3988	47.3367	68.198	68.1787
Min	UN Subregion	Northern Africa	2.51331e+08	0.100412	8.89991	39.0947	0.403023	81.7068	0.544036	9.00807	14.7051	96.4811	0	0.592781	0	15.3306	0.081539	40.0495	17.0956	7.9161	8.89991	47.939	25.3418	4.50818	8.09668	7.90537	72.3649	36.9736	39.0947	8.85043	37.8864	36.0781	43.6884	31.2461	18.1239	14.2835	33.1912	47.8646	4.81576	4.85164	0	0	32.5353	32.5417	42.5318	42.5318
Lower quartile	UN Subregion	Northern Africa	2.51331e+08	0.100412	10.1504	41.2964	0.426148	83.3614	0.599087	10.1523	15.634	98.5829	0	0.982045	0	18.0804	0.097312	49.4388	17.4184	9.4004	10.1504	49.6924	29.6564	7.44892	9.57459	9.10647	72.7004	40.8383	41.2964	9.84038	41.5199	40.1842	51.2689	42.1444	18.7323	14.8148	38.6636	55.0926	6.73789	6.74388	1.96773	1.97276	45.0354	44.9173	59.7188	59.7188
Median	UN Subregion	Northern Africa	2.51331e+08	0.100412	10.376	41.7896	0.432994	83.7472	0.614615	10.5148	15.8432	98.848	0	1.15203	0.000746326	19.0049	0.102107	53.0505	17.497	9.86729	10.376	50.0104	30.3932	8.56049	9.93819	9.50236	72.7844	41.5931	41.7896	9.99802	42.178	41.0025	53.0208	44.5066	18.8377	14.9032	40.7622	58.0511	7.1412	7.15446	6.17186	6.17103	47.5082	47.4874	68.6641	68.5887
Upper quartile	UN Subregion	Northern Africa	2.51331e+08	0.100412	10.5906	42.2931	0.440385	84.1237	0.629859	10.8961	16.0533	99.018	0	1.41711	0.00675221	20.0525	0.107653	56.897	17.5798	10.4351	10.5906	50.3146	31.1323	9.6559	10.2693	9.9495	72.8669	42.32	42.2931	10.1514	42.8273	41.8747	54.743	46.8713	18.9443	14.9921	42.8484	61.16	7.57236	7.58984	9.99671	9.96121	49.7899	49.8601	76.9774	76.9677
Max	UN Subregion	Northern Africa	2.51331e+08	0.100412	11.6934	44.9089	0.474943	85.6236	0.704569	12.6615	16.928	99.4072	0	3.5189	0.169142	25.0828	0.137735	66.3886	17.9649	12.3358	11.6934	52.0115	34.2739	12.4047	11.8908	11.9116	73.2769	46.3704	44.9089	11.1331	47.6547	45.8575	64.2988	61.8015	19.5614	15.6067	48.3135	69.3932	10.0196	9.98947	58.7683	58.7683	62.4318	62.1667	93.1205	93.1205
Mean	UN Subregion	Northern America	3.73537e+08	0.213399	11.0586	61.7009	0.0771619	99.9996	0.0659619	31.6361	100	91.6624	4.83622	3.50133	99.776			66.2235	17.4989	12.1961	11.0586		2.30054	8.49918		12.2056	72.7832	61.6988	61.7009			61.6551	52.9958	61.6869	18.8401	14.9003	40.74	58.0797	3.78162e-05	3.79527e-05	6.04632e-06	5.91038e-06	33.4229	33.5254	33.8743	33.8409
Min	UN Subregion	Northern America	3.73537e+08	0.213399	10.365	60.4727	0.0730089	99.9973	0.0609513	28.7228	100	85.4017	2.02409	1.04968	99.7397			33.3316	17.3245	2.98	10.365		2.0675	8.10234		2.98	72.6177	30.2674	60.4727			30.2674	45.2691	58.9632	18.3253	14.4636	39.9978	56.7987	0	0	0	0	1.28754	1.28754	1.25386	1.25386
Lower quartile	UN Subregion	Northern America	3.73537e+08	0.213399	10.9596	61.4591	0.0763014	99.9993	0.0649599	31.0268	100	90.7768	4.02872	2.81087	99.7696			52.6321	17.4672	8.75047	10.9596		2.25477	8.43062		8.76899	72.7486	56.6585	61.4591			56.7472	51.6667	61.3076	18.755	14.829	40.6051	57.8778	0	0	0	0	17.805	17.8929	18.5409	18.4864
Median	UN Subregion	Northern America	3.73537e+08	0.213399	11.0564	61.7034	0.0771538	99.9997	0.0659588	31.6353	100	91.7356	4.73289	3.41199	99.7762			66.192	17.499	11.74	11.0564		2.30091	8.50115		11.7487	72.783	61.6969	61.7034			61.5888	53.0169	61.6857	18.8398	14.9007	40.7404	58.0797	9.63622e-06	8.87548e-06	7.22934e-07	6.97817e-07	33.1112	33.2248	33.8066	33.8639
Upper quartile	UN Subregion	Northern America	3.73537e+08	0.213399	11.1581	61.9489	0.0779942	99.9999	0.0669413	32.2369	100	92.6609	5.52775	4.07302	99.7825			80.1668	17.5301	15.148	11.1581		2.34577	8.56794		15.0577	72.8174	66.8082	61.9489			66.6849	54.379	62.0687	18.925	14.972	40.8759	58.2778	4.81971e-05	4.66099e-05	6.05959e-06	6.02618e-06	48.4592	48.6587	49.326	49.3083
Max	UN Subregion	Northern America	3.73537e+08	0.213399	11.653	63.4916	0.0815297	100	0.0713478	35.5316	100	96.0717	9.94179	8.62646	99.8096			98.643	17.6695	26.39	11.653		2.56193	8.84251		26.39	72.9747	90.6186	63.4916			90.6186	60.088	64.0494	19.3956	15.2747	41.5662	59.2409	0.000791915	0.000782819	0.000197643	0.000234783	66.6684	66.6684	66.671	66.671
Mean	UN Subregion	Northern Europe	1.05542e+08	0.205334	11.094	61.6888	0.0675116	99.9646	0.0525187	47.3112	100	50.0592	42.3518	7.58897	99.6139			66.0113	17.5014	10.9839	11.094		2.29943	8.4944		10.9658	72.7848	61.6296	61.6888			61.6487	53.0154	61.6896	18.837	14.8989	40.7284	58.0815	0.00192942	0.00191528	0.0030013	0.00299717	34.1782	33.954	34.0267	34.0498
Min	UN Subregion	Northern Europe	1.05542e+08	0.205334	10.1016	59.7112	0.0626287	99.9244	0.0468967	43.7413	100	45.642	38.0002	5.29431	99.5451			41.5044	17.1524	6.47891	10.1016		1.88009	7.93685		4.98899	72.5349	42.2117	59.7112			43.9719	40.0471	57.1083	17.7602	13.9566	39.5074	56.1797	0.000183221	8.09179e-05	0.00100191	0.000836202	3.46506	4.28755	7.42867	5.78398
Lower quartile	UN Subregion	Northern Europe	1.05542e+08	0.205334	10.9284	61.3751	0.0663322	99.9589	0.0513113	46.5679	100	49.2397	41.4668	7.13471	99.5979			58.6346	17.4551	10.2583	10.9284		2.22452	8.36304		10.3161	72.7359	58.9623	61.3751			58.9446	50.9006	61.0071	18.7169	14.8076	40.4846	57.7371	0.00113887	0.0011042	0.00241231	0.00239217	25.898	25.6481	26.1012	26.163
Median	UN Subregion	Northern Europe	1.05542e+08	0.205334	11.0954	61.6901	0.0673772	99.9668	0.0523695	47.2766	100	50.06	42.3385	7.58035	99.6138			66.0693	17.5029	10.8038	11.0954		2.29932	8.49569		10.8313	72.7841	61.7395	61.6901			61.6832	53.0393	61.6968	18.8372	14.9001	40.7227	58.083	0.0016509	0.00163745	0.00291906	0.00290694	34.1405	33.9163	33.9274	34.1866
Upper quartile	UN Subregion	Northern Europe	1.05542e+08	0.205334	11.2608	62.0133	0.0685575	99.9709	0.0535955	48.0781	100	50.8674	43.2684	8.0296	99.6302			73.3194	17.5481	11.5341	11.2608		2.37296	8.6294		11.4303	72.8325	64.3359	62.0133			64.3852	55.0738	62.3787	18.9532	14.989	40.9764	58.4403	0.0024421	0.00245426	0.00348053	0.00350546	42.6319	42.2014	42.0949	42.0716
Max	UN Subregion	Northern Europe	1.05542e+08	0.205334	12.0316	63.8192	0.0736262	99.9813	0.0611539	51.6041	100	54.5656	47.6027	10.28	99.6741			90.0089	17.7454	18.8749	12.0316		2.72327	9.05456		17.5993	73.1039	80.0663	63.8192			77.5115	64.6007	65.5533	20.0056	15.5729	42.0988	60.0752	0.0109102	0.0102648	0.00689923	0.00691387	63.7991	64.7301	60.4827	60.1669
Mean	UN Subregion	Polynesia	702876	0.194467	12.2362	45.0654	0.384686	91.8889	0.396883	9.23086	74.2408	99.4352	0	0.564791	60.8964	19.4169	0.103608	52.4111	17.4925	10.9211	12.2362	50.0385	29.946	8.47279	11.8736	11.0489	72.7939	42.3209	45.0654	10.0034	41.8413	42.1495	53.1047	60.6457	18.836	14.9032	40.7454	58.1208	9.92529	9.97262	0.825115	1.49092	46.8448	46.827	45.5836	45.5207
Min	UN Subregion	Polynesia	702876	0.194467	9.26994	24.1907	0.227273	83.5393	0.164335	1.01333	50.7641	92.0249	0	0.0258617	1.20973	3.95783	0.0236814	28.3517	15.8867	6.38297	9.26994	42.6335	11.5415	4.66772	7.76068	6.49412	71.2949	17.1825	24.1907	6.18915	12.5197	24.4504	16.2447	25.3533	16.3329	12.7077	33.4222	47.5662	2.01382	2.39517	0.00768918	0.0319946	10.5862	7.98653	5.27338	5.25245
Lower quartile	UN Subregion	Polynesia	702876	0.194467	11.8234	41.9926	0.336688	90.6897	0.324095	4.47054	70.0853	99.4303	0	0.160704	43.7504	13.8812	0.0744322	46.5733	17.223	10.2707	11.8234	48.608	26.109	7.62234	11.4271	10.4058	72.506	39.7906	41.9926	9.27633	37.8796	39.2515	44.0142	56.1828	18.3161	14.5041	39.036	55.84	7.4378	7.3801	0.125928	0.280575	38.7595	39.0503	27.9952	27.4343
Median	UN Subregion	Polynesia	702876	0.194467	12.2655	45.1423	0.383743	92.1006	0.387043	7.28138	74.6843	99.6797	0	0.320267	64.9944	18.224	0.0971817	52.2416	17.49	10.9767	12.2655	50.0226	29.8167	8.47735	12.038	11.1109	72.8008	42.3627	45.1423	10.0155	41.8067	42.1456	52.8862	60.6192	18.8346	14.897	40.7564	58.1527	9.50668	9.5181	0.304113	0.653656	47.2048	47.2088	45.4973	45.4202
Upper quartile	UN Subregion	Polynesia	702876	0.194467	12.665	48.21	0.42791	93.3422	0.457918	13.3581	78.9662	99.8393	0	0.569699	80.9662	23.8901	0.126689	58.2049	17.775	11.6077	12.665	51.4767	33.6503	9.33391	12.4547	11.7399	73.0816	44.9377	48.21	10.711	46.0124	45.0628	62.4981	65.2835	19.3431	15.308	42.4469	60.4068	11.8597	12.0473	0.742772	1.57324	55.383	55.203	63.3626	63.7784
Max	UN Subregion	Polynesia	702876	0.194467	15.5177	64.4105	0.576946	96.0952	1.01918	34.149	89.6423	99.9741	0	7.97506	96.7478	54.7469	0.309663	76.6228	18.8118	15.2881	15.5177	57.3731	49.0146	12.3529	15.6344	15.4025	74.162	64.7879	64.4105	13.7665	67.6157	64.2957	88.5502	91.4898	21.7385	16.8453	48.0093	68.1702	31.244	27.7883	49.7855	49.6301	80.2946	78.8404	84.4153	84.4153
Mean	UN Subregion	South-eastern Asia	6.68357e+08	0.194741	12.3704	42.1715	0.597276	78.4139	0.686109	12.8455	34.7377	87.3119	6.67986	6.00826	2.47708	19.0874	0.102673	52.3073	17.5004	12.0005	12.3704	50.0022	30.3677	8.51126	12.5225	12.0641	72.7833	42.362	42.1715	10.0005	42.1868	41.985	52.9853	50.948	18.8425	14.903	40.7331	58.0856	13.1819	13.1859	1.76401	2.45527	45.2627	45.277	52.9324	52.3283
Min	UN Subregion	South-eastern Asia	6.68357e+08	0.194741	11.6182	40.3042	0.577074	76.8503	0.638483	11.658	33.1434	85.4255	5.87582	5.02143	1.28217	16.9335	0.0911689	48.7709	17.3234	11.2123	11.6182	49.275	27.5819	5.99618	11.6641	11.2438	72.6217	40.1541	40.3042	9.64044	39.8113	39.8759	46.761	39.3172	18.3291	14.5882	36.1926	50.7712	10.502	10.6365	0.584064	0.663727	39.3219	40.0307	40.2571	40.4319
Lower quartile	UN Subregion	South-eastern Asia	6.68357e+08	0.194741	12.2493	41.8462	0.593327	78.1273	0.675968	12.5874	34.457	86.9929	6.53945	5.75022	1.98935	18.6758	0.100452	51.6058	17.4703	11.8501	12.2493	49.8599	29.883	8.0347	12.3478	11.8965	72.7497	42.0325	41.8462	9.93173	41.8077	41.6066	51.8369	48.471	18.7741	14.8462	39.7566	56.8873	12.7464	12.722	1.44187	2.00055	44.3254	44.2871	50.7104	50.166
Median	UN Subregion	South-eastern Asia	6.68357e+08	0.194741	12.3664	42.1744	0.597248	78.4132	0.6858	12.8344	34.7365	87.3372	6.68124	5.9556	2.31002	19.0828	0.102592	52.2894	17.5012	11.999	12.3664	50.0014	30.3663	8.51317	12.524	12.0614	72.783	42.3735	42.1744	9.99983	42.1885	41.9925	52.9558	50.7492	18.8419	14.9033	40.738	58.085	13.1948	13.2165	1.73623	2.43346	45.3036	45.2835	52.8893	52.3313
Upper quartile	UN Subregion	South-eastern Asia	6.68357e+08	0.194741	12.4902	42.4912	0.601067	78.7146	0.695773	13.0921	35.0168	87.6587	6.82339	6.2015	2.72793	19.476	0.104757	53.021	17.5316	12.1509	12.4902	50.1429	30.8462	9.01068	12.6934	12.2297	72.8165	42.6942	42.4912	10.0693	42.5689	42.3751	54.1713	53.1878	18.9122	14.9581	41.7124	59.2905	13.6459	13.6669	2.07056	2.90343	46.22	46.2626	55.2027	54.5815
Max	UN Subregion	South-eastern Asia	6.68357e+08	0.194741	13.1669	43.9494	0.619244	79.9062	0.742979	14.4234	36.2243	88.9593	7.4571	7.83913	6.40487	21.3154	0.115291	55.8792	17.6479	12.9234	13.1669	50.8202	33.4812	10.6909	13.5525	12.9604	72.9691	44.1418	43.9494	10.4438	44.0582	43.9116	58.8143	67.7319	19.3043	15.2844	45.258	65.4723	15.4307	15.6163	3.87898	5.85645	50.3325	50.1647	63.9982	64.1337
Mean	UN Subregion	Southern Asia	1.96931e+09	0.177256	10.0039	41.7744	0.67863	77.0718	0.788644	18.3908	3.55056	85.1602	0	14.8398	0.442538	19.1015	0.102633	56.9873	17.5003	9.8107	10.0039	49.999	30.381	8.51014	10.1109	9.78799	72.7834	41.7282	41.7744	9.99943	41.7153	41.6569	52.9828	44.3639	18.8422	14.9002	40.7583	58.0538	14.9961	14.9978	0.710556	0.709589	42.9926	42.9623	65.6387	65.6256
Min	UN Subregion	Southern Asia	1.96931e+09	0.177256	9.51941	40.3398	0.659266	75.4497	0.743342	17.1341	3.08886	81.7732	0	12.0904	0.289704	17.2124	0.0924138	53.122	17.3436	9.0073	9.51941	49.3081	28.473	6.03971	9.303	9.13182	72.6382	39.3263	40.3398	9.62728	39.3542	39.2236	48.6994	37.9639	18.5428	14.6417	35.6745	50.7406	13.1797	12.9694	0.232756	0.28944	37.9939	38.2969	54.9178	54.9636
Lower quartile	UN Subregion	Southern Asia	1.96931e+09	0.177256	9.90704	41.5273	0.674895	76.7967	0.781336	18.133	3.45441	84.5716	0	14.2177	0.386723	18.7325	0.100609	56.2663	17.4748	9.66215	9.90704	49.8752	30.0594	7.95151	9.964	9.64619	72.7565	41.33	41.5273	9.93856	41.3383	41.2871	52.2345	43.0723	18.7947	14.8628	39.6624	56.538	14.6264	14.6261	0.588993	0.587544	42.1756	42.1034	63.5052	63.4626
Median	UN Subregion	Southern Asia	1.96931e+09	0.177256	10.0017	41.7727	0.678616	77.0787	0.788535	18.3794	3.55335	85.1957	0	14.8043	0.431869	19.0928	0.102614	56.9892	17.5008	9.80459	10.0017	49.9965	30.3864	8.51463	10.1063	9.78227	72.7835	41.7196	41.7727	9.99878	41.7084	41.6458	52.9848	44.3892	18.8405	14.9005	40.7334	58.0608	14.986	14.9951	0.693966	0.695955	43.0001	42.9572	65.7002	65.649
Upper quartile	UN Subregion	Southern Asia	1.96931e+09	0.177256	10.1003	42.0233	0.682259	77.3406	0.795971	18.6436	3.64616	85.7823	0	15.4284	0.486703	19.4476	0.104483	57.6731	17.5261	9.95339	10.1003	50.1232	30.6979	9.07381	10.254	9.92581	72.8099	42.1265	42.0233	10.061	42.0814	42.0271	53.7243	45.6434	18.8904	14.9395	41.8504	59.5717	15.3649	15.3699	0.816593	0.81561	43.8026	43.8058	67.7875	67.7358
Max	UN Subregion	Southern Asia	1.96931e+09	0.177256	10.5669	43.1932	0.696965	78.6335	0.831901	20.1321	3.99411	87.9096	0	18.2268	0.806196	21.1611	0.114853	60.6115	17.6319	10.6663	10.5669	50.7582	32.5129	11.0042	11.0321	10.5877	72.9338	44.0076	43.1932	10.3574	43.9852	44.2467	57.1443	52.0679	19.1448	15.1232	45.8902	65.0666	17.2938	17.0143	1.46238	1.42101	48.0037	47.7877	77.1312	76.6598
Mean	UN Subregion	Southern Europe	1.50725e+08	0.256241	12.6995	56.9805	0.102969	98.3092	0.11547	22.0346	95.714	84.9372	10.8361	4.22671	96.9627	19.0694	0.102683	30.6755	17.5007	11.3374	12.6995	49.9645	26.6575	8.50395	12.7753	11.9709	72.786	44.5032	56.9805	10.0004	44.4336	44.8298	52.8076	61.7063	18.8347	14.9028	40.7457	58.0774	6.96711	6.95334	0.00183431	0.00184195	68.2959	68.2771	33.9599	33.9885
Min	UN Subregion	Southern Europe	1.50725e+08	0.256241	11.7129	54.6606	0.0966092	98.085	0.103064	18.3593	95.0609	79.6809	6.98976	3.48803	95.293	8.89993	0.0431476	26.0751	17.2306	10.035	11.7129	44.6901	19.8866	7.62878	9.71708	10.5164	72.4861	41.5539	54.6606	7.24943	36.8225	41.2503	33.8422	58.0111	17.3975	13.7035	39.5541	56.244	4.13811	4.39723	0.000693405	0.000664564	59.0434	59.3409	15.295	14.7052
Lower quartile	UN Subregion	Southern Europe	1.50725e+08	0.256241	12.51	56.5438	0.101631	98.2689	0.112763	21.317	95.6121	83.9132	9.72192	4.07464	96.7515	15.0194	0.0799542	29.1892	17.4482	11.1364	12.51	48.9374	25.3165	8.37762	12.3128	11.7419	72.7313	44.0215	56.5438	9.51053	43.2975	44.2385	49.581	61.0131	18.653	14.752	40.4922	57.7163	6.4753	6.40179	0.00146294	0.00146244	67.3903	67.3585	30.7794	30.6595
Median	UN Subregion	Southern Europe	1.50725e+08	0.256241	12.6972	56.9914	0.102889	98.311	0.115398	22.0212	95.7149	85.0274	10.7238	4.22307	97.0002	18.1221	0.097379	30.7137	17.5009	11.3353	12.6972	49.987	26.556	8.50154	12.8347	11.9835	72.7874	44.4986	56.9914	9.98491	44.4366	44.8276	52.8882	61.716	18.8308	14.9042	40.7466	58.0733	6.97861	6.95967	0.00175387	0.00176355	68.4042	68.4052	33.9313	34.0175
Upper quartile	UN Subregion	Southern Europe	1.50725e+08	0.256241	12.8895	57.4039	0.104309	98.3518	0.118025	22.7541	95.8215	86.0659	11.8109	4.3685	97.218	22.3826	0.120479	32.1201	17.5553	11.5286	12.8895	50.9394	27.8469	8.63375	13.3135	12.206	72.8411	44.9785	57.4039	10.4902	45.5183	45.4238	56.136	62.3841	19.015	15.0508	41.0023	58.4516	7.48086	7.49641	0.00212098	0.00213195	69.3238	69.3525	37.1444	37.2651
Max	UN Subregion	Southern Europe	1.50725e+08	0.256241	13.8406	59.3696	0.110242	98.5166	0.130063	25.6792	96.2471	89.3188	16.1857	5.07188	97.8322	40.9712	0.231323	35.3283	17.7565	12.4754	13.8406	55.8166	34.9163	9.15849	14.7651	13.2563	73.0607	47.2544	59.3696	13.2855	52.835	48.5755	70.1372	65.7976	20.3376	16.3328	42.5045	60.2148	9.60168	9.62511	0.00688342	0.00563962	73.4657	74.2091	53.7578	52.5599
Mean	UN Subregion	Sub-Saharan Africa	1.109e+09	0.246452	9.51172	42.0765	1.22194	49.3851	0.976757	16.7479	10.2559	97.3251	0.984314	1.69062	0.912768	19.1226	0.102682	62.9948	17.4988	10.0658	9.51172	50.0033	30.3831	8.51827	10.3955	9.33622	72.7827	41.8401	42.0765	9.99833	42.1109	41.6883	52.9991	47.5283	18.8406	14.9015	40.7651	58.0858	36.2103	36.2051	0.0910889	0.097115	36.237	36.2237	62.2795	63.689
Min	UN Subregion	Sub-Saharan Africa	1.109e+09	0.246452	8.7211	39.6672	1.1805	47.1967	0.904309	15.2549	8.80413	96.992	0.853685	1.36872	0.656632	16.2223	0.0881648	60.622	17.3498	9.07678	8.7211	48.733	28.1436	4.95549	9.18335	8.65184	72.6377	39.9604	39.6672	9.43384	39.8891	39.9434	47.1928	32.2579	18.4459	14.5812	33.7233	48.3019	29.5827	29.1591	0.00702988	0.0110098	32.9166	32.3007	11.5663	24.5359
Lower quartile	UN Subregion	Sub-Saharan Africa	1.109e+09	0.246452	9.37725	41.7705	1.21315	48.9718	0.963007	16.4202	9.97609	97.2519	0.965312	1.64018	0.806926	18.508	0.0992233	62.4839	17.4706	9.8575	9.37725	49.8075	29.98	7.59965	10.0891	9.19165	72.7525	41.4918	41.7705	9.89789	41.6551	41.4088	52.0798	44.9442	18.7808	14.8549	39.0241	55.3998	35.3972	35.3403	0.0559759	0.0599581	35.6795	35.6419	57.3416	59.3506
Median	UN Subregion	Sub-Saharan Africa	1.109e+09	0.246452	9.50373	42.0666	1.22165	49.3686	0.976097	16.7266	10.2616	97.3222	0.984808	1.69647	0.89061	19.0981	0.102466	62.9883	17.4996	10.0701	9.50373	50.0028	30.3923	8.52869	10.3645	9.34306	72.7828	41.8259	42.0666	10.0027	42.1094	41.6868	53.0126	47.5975	18.8401	14.9014	40.7836	58.1022	36.2844	36.2825	0.0786566	0.0829453	36.2394	36.2161	63.4197	64.5426
Upper quartile	UN Subregion	Sub-Saharan Africa	1.109e+09	0.246452	9.64034	42.3882	1.23043	49.7875	0.990895	17.0624	10.5341	97.3923	1.00476	1.74818	0.994419	19.7061	0.105723	63.5049	17.527	10.2726	9.64034	50.2075	30.802	9.44094	10.6641	9.47832	72.8138	42.1895	42.3882	10.1009	42.5412	41.9619	53.9222	50.2295	18.9005	14.949	42.4985	60.7071	37.0919	37.1553	0.109874	0.116274	36.7933	36.7616	68.3442	68.857
Max	UN Subregion	Sub-Saharan Africa	1.109e+09	0.246452	10.506	45.737	1.27302	51.8049	1.0609	18.7785	11.4431	97.7284	1.07641	1.97965	1.5768	22.8575	0.12183	65.6457	17.6484	10.8807	10.506	51.3099	32.5548	12.3808	12.6612	9.98475	72.9394	43.7175	45.737	10.5861	44.8278	43.2292	59.5069	60.36	19.2469	15.2651	47.622	69.0065	40.8923	40.1886	1.01922	1.12496	39.6035	39.6309	82.3518	83.175
Mean	UN Subregion	Western Asia	2.85991e+08	0.149313	11.9046	44.9039	0.239841	88.8919	0.309649	10.0247	68.3625	93.6701	2.84897	3.48097	35.8418	19.0972	0.102834	42.0961	17.5014	11.8267	11.9046	50.0051	30.2437	8.5056	11.9647	11.5843	72.7821	43.8714	44.9039	9.99282	45.92	43.4279	52.9545	60.5858	18.8383	14.9005	40.7765	58.0627	6.30145	6.31498	0.137335	0.262237	55.436	55.2889	65.5997	65.8749
Min	UN Subregion	Western Asia	2.85991e+08	0.149313	10.3915	40.3223	0.22076	86.5264	0.263662	7.83075	64.1426	89.1336	0.906952	2.51536	23.6747	12.6612	0.0658524	35.4228	17.1214	10.1958	10.3915	46.8948	23.8602	6.76318	8.99779	9.56035	72.4623	40.5193	40.3223	8.61619	37.0204	38.5033	40.7526	47.784	17.7842	14.0129	37.1226	52.7594	3.82837	3.7053	0.041601	0.077944	39.612	39.21	42.1334	50.114
Lower quartile	UN Subregion	Western Asia	2.85991e+08	0.149313	11.5897	44.3534	0.235823	88.4922	0.299739	9.53079	67.5912	93.0031	2.1712	3.22807	32.9779	17.6792	0.0951714	40.6786	17.4342	11.4481	11.5897	49.5551	29.2275	8.11978	11.3452	11.1832	72.7113	43.4215	44.3534	9.76522	44.5493	42.7948	50.5839	58.4802	18.6961	14.7849	40.0303	57.0022	5.82376	5.8128	0.10881	0.206969	53.6694	53.4046	63.6494	63.9524
Median	UN Subregion	Western Asia	2.85991e+08	0.149313	11.8913	44.9228	0.239597	88.9048	0.309236	9.98588	68.419	93.8324	2.6753	3.44326	35.6711	18.9871	0.102197	42.0192	17.5012	11.8252	11.8913	50.0044	30.2363	8.51072	11.9126	11.5607	72.7827	43.886	44.9228	9.99066	45.6489	43.4622	52.979	60.549	18.8366	14.9017	40.7864	58.067	6.28501	6.31279	0.131496	0.252794	55.6217	55.5247	65.7355	65.9577
Upper quartile	UN Subregion	Western Asia	2.85991e+08	0.149313	12.2149	45.5173	0.243716	89.3208	0.318958	10.4884	69.1895	94.4733	3.40653	3.6898	38.5164	20.3653	0.109629	43.407	17.5688	12.1908	12.2149	50.4602	31.2668	8.88826	12.501	11.9644	72.855	44.3326	45.5173	10.2286	46.9647	44.0749	55.3465	62.7268	18.9791	15.0188	41.537	59.1109	6.76193	6.81459	0.16083	0.305776	57.4195	57.4015	67.7558	67.8985
Max	UN Subregion	Western Asia	2.85991e+08	0.149313	13.6196	48.3371	0.265714	91.1967	0.363425	13.3075	72.2456	96.2758	5.97043	5.35399	51.0007	27.5191	0.161266	51.0336	17.9375	13.8135	13.6196	52.4885	38.0774	10.3237	16.6944	13.8446	73.1674	46.6915	48.3371	11.2602	63.1548	47.8934	66.4647	70.3751	19.8512	15.714	44.425	62.8867	8.8706	9.76869	0.346112	0.653671	65.0484	64.8529	77.1456	76.6887
Mean	UN Subregion	Western Europe	1.95039e+08	0.291076	11.601	61.7033	0.0802537	100	0.06878	59.4415	100	38.2217	52.9073	8.87107	99.6365				17.5		11.601		2.29938	8.50124			72.7832		61.7033				52.9809	61.6904	18.8374	14.9008	40.7424	58.0725	0	0	0	0
Min	UN Subregion	Western Europe	1.95039e+08	0.291076	10.8056	60.0017	0.0756692	100	0.0630618	54.7112	100	33.9693	47.6155	6.55859	99.5814				17.287		10.8056		2.10348	8.16424			72.5599		60.0017				46.2545	59.5927	18.367	14.5495	40.0883	57.152	0	0	0	0
Lower quartile	UN Subregion	Western Europe	1.95039e+08	0.291076	11.4344	61.3751	0.0793674	100	0.067603	58.4175	100	37.4768	52.0401	8.45227	99.6275				17.459		11.4344		2.26097	8.44055			72.7397		61.3751				51.8259	61.3682	18.7659	14.8445	40.6252	57.9026	0	0	0	0
Median	UN Subregion	Western Europe	1.95039e+08	0.291076	11.5974	61.6983	0.0802201	100	0.0687376	59.4596	100	38.2199	52.9121	8.86146	99.6366				17.4993		11.5974		2.29898	8.50181			72.7826		61.6983				53.0035	61.6906	18.8373	14.9017	40.7436	58.076	0	0	0	0
Upper quartile	UN Subregion	Western Europe	1.95039e+08	0.291076	11.7634	62.0201	0.0811078	100	0.0699232	60.4159	100	38.9811	53.805	9.29001	99.6457				17.5404		11.7634		2.3375	8.56163			72.8269		62.0201				54.0873	62.0186	18.9111	14.9582	40.8608	58.2435	0	0	0	0
Max	UN Subregion	Western Europe	1.95039e+08	0.291076	12.7746	63.7408	0.0857424	100	0.0751606	64.5544	100	43.438	57.8514	11.5238	99.6807				17.7317		12.7746		2.49764	8.81054			73.0699		63.7408				60.7734	63.6394	19.2455	15.2141	41.424	58.9793	0	0	0	0
Mean	UN Intermediate region	Caribbean	4.39122e+07	0.246881	11.4223	44.7926	0.529615	80.605	0.387217	9.51717	88.8887	99.1814	0	0.818608	25.3852	18.9864	0.102404	54.0289	17.497	11.5411	11.4223	50.0031	30.2698	8.49192	11.5734	11.8485	72.7817	43.6822	44.7926	9.99955	43.3448	43.068	52.9917	58.709	18.8366	14.9024	40.7523	58.0837	15.0071	15.051	0.514222	0.82816	40.3864	40.4046	61.2852	63.9618
Min	UN Intermediate region	Caribbean	4.39122e+07	0.246881	9.56555	39.738	0.45872	77.7051	0.316112	7.51422	85.9164	98.2842	0	0.336542	14.5608	8.56701	0.0473701	46.4701	16.8842	9.99371	9.56555	45.2168	24.2587	7.40472	8.1742	9.77899	72.0631	37.2586	39.738	7.37311	34.6276	33.5154	35.8465	49.7618	17.8181	13.9514	38.5142	55.0229	7.10096	7.01783	0.23156	0.384589	26.7963	24.129	34.8893	44.6729
Lower quartile	UN Intermediate region	Caribbean	4.39122e+07	0.246881	11.1274	44.1689	0.513643	80.0657	0.372469	9.02547	88.3646	99.0762	0	0.691939	22.9695	15.5779	0.0841594	52.3331	17.3582	11.2515	11.1274	49.0447	29.1175	8.28844	11.0502	11.4354	72.6352	42.7028	44.1689	9.51054	42.2719	41.4986	50.2902	57.5705	18.6737	14.775	40.3458	57.5392	13.1797	13.1331	0.436183	0.713345	38.1158	38.1364	59.38	62.4056
Median	UN Intermediate region	Caribbean	4.39122e+07	0.246881	11.4127	44.8259	0.529258	80.629	0.386258	9.49235	88.9424	99.2017	0	0.798328	25.2691	18.3873	0.0989665	54.0505	17.5	11.5457	11.4127	50.0134	30.2644	8.49208	11.5897	11.8381	72.7812	43.721	44.8259	10.0078	43.4685	43.1039	53.0251	58.6417	18.8388	14.906	40.7437	58.0901	14.7724	14.8179	0.502677	0.815155	40.5559	40.5569	61.8782	64.2108
Upper quartile	UN Intermediate region	Caribbean	4.39122e+07	0.246881	11.7131	45.4608	0.544604	81.1411	0.400853	9.96996	89.4568	99.3081	0	0.92379	27.6405	21.8593	0.117161	55.7361	17.6379	11.8397	11.7131	50.9708	31.4015	8.69059	12.1079	12.2601	72.9318	44.7018	45.4608	10.4556	44.5979	44.62	55.7207	59.8075	19.0014	15.0351	41.1661	58.6192	16.653	16.729	0.580664	0.931796	42.8105	42.8456	63.7848	65.7499
Max	UN Intermediate region	Caribbean	4.39122e+07	0.246881	13.4595	49.97	0.625915	83.4713	0.476125	12.1295	91.3574	99.6635	0	1.7158	38.8978	36.4321	0.208245	61.21	18.1836	13.0468	13.4595	55.2953	36.5228	9.70962	15.8709	14.481	73.4595	49.8986	49.97	12.4547	50.9569	53.9744	66.138	66.939	19.8246	15.8369	43.1929	60.8654	29.8462	28.7539	0.993765	1.5021	52.2268	51.6374	71.4865	71.952
Mean	UN Intermediate region	Central America	1.76219e+08	0.175019	11.3213	43.8526	0.411778	82.8451	0.440184	10.6569	88.0644	91.0934	0	8.9066	12.942	19.076	0.102922	39.7152	17.5006	10.7907	11.3213	49.9985	30.3677	8.48369	11.3194	10.9174	72.7822	43.7077	43.8526	10.0007	42.0978	43.091	53.0333	44.4679	18.8411	14.8988	40.7232	58.0812	7.2304	7.24302	0.878102	0.878849	55.1398	55.1315	69.6622	69.6709
Min	UN Intermediate region	Central America	1.76219e+08	0.175019	10.6529	42.354	0.393161	81.6832	0.401755	9.31015	87.0185	89.5538	0	7.51705	10.5442	14.2623	0.0754511	36.2746	17.346	10.1639	10.6529	47.3671	25.2311	5.1097	9.93542	10.1892	72.6126	42.0838	42.354	8.85579	32.0978	40.4398	43.2439	32.4842	18.076	14.2118	33.7363	48.8348	4.51464	4.92968	0.46146	0.480047	46.3081	45.1954	61.046	61.2161
Lower quartile	UN Intermediate region	Central America	1.76219e+08	0.175019	11.2109	43.6198	0.408407	82.6344	0.432728	10.3537	87.8819	90.8233	0	8.64923	12.4958	17.6798	0.0953779	39.1233	17.4701	10.6777	11.2109	49.5766	29.6929	7.50933	10.9815	10.7951	72.7522	43.4703	43.6198	9.78861	40.9002	42.6706	51.4293	42.3465	18.7405	14.8212	38.8438	55.3883	6.87452	6.89133	0.757203	0.758718	54.2163	54.2128	68.4978	68.4821
Median	UN Intermediate region	Central America	1.76219e+08	0.175019	11.3214	43.8597	0.411821	82.8535	0.439839	10.632	88.0675	91.0909	0	8.90906	12.9322	18.9055	0.102006	39.7341	17.5002	10.7917	11.3214	50.0028	30.3576	8.46465	11.2994	10.9152	72.7813	43.7156	43.8597	10.0017	42.1228	43.1007	53.0687	44.4929	18.8405	14.8994	40.7101	58.1081	7.25503	7.26646	0.858192	0.856533	55.2226	55.2088	69.8145	69.8303
Upper quartile	UN Intermediate region	Central America	1.76219e+08	0.175019	11.4316	44.0838	0.415027	83.0531	0.447105	10.9238	88.2506	91.3508	0	9.17667	13.3964	20.2888	0.109618	40.3125	17.5303	10.9036	11.4316	50.4239	31.0456	9.48903	11.6326	11.0411	72.8132	43.9499	44.0838	10.2127	43.2695	43.5036	54.6594	46.6086	18.9392	14.9774	42.6345	60.7845	7.62307	7.62249	0.983483	0.980836	56.1428	56.181	71.0349	71.035
Max	UN Intermediate region	Central America	1.76219e+08	0.175019	12.1339	45.7859	0.430156	83.8674	0.485327	12.4865	88.9498	92.483	0	10.4462	15.4626	27.3843	0.149771	42.664	17.6483	11.5376	12.1339	52.4856	34.4921	11.9518	12.8779	11.6522	72.931	45.1918	45.7859	11.3391	53.1233	46.1478	63.198	55.7489	19.634	15.5594	47.3784	67.4724	9.01759	8.94481	1.59064	1.69338	60.7591	60.8331	75.9419	75.8937
Mean	UN Intermediate region	Channel Islands	170482	0.0885702	12.0974	61.7252	0.0713677	100	0.0821701	18.4055	100	99.9595	0	0.0405031	99.2967				17.4939		12.0974		2.30352	8.49403			72.7806		61.7252				52.9352	61.7393	18.8416	14.9091	40.7326	57.9816	0	0	0	0
Min	UN Intermediate region	Channel Islands	170482	0.0885702	5.93292	40.3	0.0374593	100	0.034611	3.31047	100	96.3202	0	0	96.7702				15.3862		5.93292		0.950657	5.88571			70.4566		40.3				17.419	45.0077	16.3236	13.0833	35.1351	51.0445	0	0	0	0
Lower quartile	UN Intermediate region	Channel Islands	170482	0.0885702	10.4506	59.1135	0.0635227	100	0.0675914	14.1268	100	100	0	0	99.1556				17.1121		10.4506		2.00493	7.9249			72.3812		59.1135				44.271	58.8283	18.3423	14.5301	39.636	56.4409	0	0	0	0
Median	UN Intermediate region	Channel Islands	170482	0.0885702	11.9151	61.6759	0.0704224	100	0.0797035	17.8032	100	100	0	0	99.3679				17.5086		11.9151		2.30597	8.50769			72.788		61.6759				53.0102	61.6708	18.8378	14.9005	40.7338	57.982	0	0	0	0
Upper quartile	UN Intermediate region	Channel Islands	170482	0.0885702	13.446	64.3479	0.0782267	100	0.0937822	22.3132	100	100	0	0	99.5171				17.8912		13.446		2.59872	9.07566			73.1988		64.3479				61.6936	64.6305	19.3391	15.2974	41.8444	59.5211	0	0	0	0
Max	UN Intermediate region	Channel Islands	170482	0.0885702	23.1343	77.2241	0.131583	100	0.212277	39.1174	100	100	0	3.67983	99.8383				19.3114		23.1343		3.5963	11.2159			74.9139		77.2241				85.6512	81.0167	21.3624	16.9163	46.8827	66.2302	0	0	0	0
Mean	UN Intermediate region	Eastern Africa	4.49173e+08	0.279295	8.72219	42.4999	1.61401	43.328	1.43747	17.2464	3.80825	95.6859	3.18188	1.1322	0.667317	19.112	0.102598	68.916	17.4987	8.31475	8.72219	50.0054	30.3949	8.48423	8.63179	8.15572	72.7832	42.5619	42.4999	10.0051	43.0179	42.3756	53.0013	58.5046	18.8399	14.9026	40.746	58.0571	52.4339	52.439	0.285216	0.396024	32.3556	32.3595	54.0959	55.7467
Min	UN Intermediate region	Eastern Africa	4.49173e+08	0.279295	7.91096	39.1658	1.56251	41.4877	1.30437	15.4257	2.964	95.0631	2.73648	0.962602	0.00264103	16.141	0.0873091	65.5541	17.266	7.68034	7.91096	48.7338	27.349	4.934	7.74907	7.62639	72.5879	39.8272	39.1658	9.38011	37.9163	40.5291	44.9407	33.8818	18.3587	14.539	33.8731	47.9453	44.9241	43.0393	0.000349062	0.000536222	28.2511	27.3502	5.61949	7.29623
Lower quartile	UN Intermediate region	Eastern Africa	4.49173e+08	0.279295	8.57207	41.9869	1.60413	42.9794	1.4074	16.8437	3.61887	95.5755	3.10307	1.10141	0.325106	18.4202	0.0987306	68.2794	17.4602	8.1672	8.57207	49.766	29.8478	7.68599	8.46452	8.04334	72.745	42.1014	41.9869	9.88679	42.3813	42.0086	51.7221	53.8542	18.76	14.8387	39.2134	55.9966	51.3401	51.3061	0.0852189	0.140552	31.4904	31.4741	47.4927	49.7568
Median	UN Intermediate region	Eastern Africa	4.49173e+08	0.279295	8.71512	42.4941	1.61366	43.3184	1.43716	17.2336	3.79036	95.6862	3.18221	1.1327	0.591853	19.0899	0.102443	68.9229	17.4992	8.31209	8.71512	50.0001	30.3859	8.48476	8.62319	8.15161	72.7831	42.5564	42.4941	10.0024	43.0242	42.3783	53.0211	58.6764	18.8414	14.9024	40.7435	58.028	52.6128	52.6278	0.150242	0.234837	32.3329	32.3358	55.7205	57.1334
Upper quartile	UN Intermediate region	Eastern Africa	4.49173e+08	0.279295	8.86298	43.0193	1.62369	43.6754	1.46599	17.6334	3.98762	95.7943	3.2617	1.16306	0.931137	19.7767	0.106215	69.5524	17.538	8.45875	8.86298	50.2561	30.9346	9.27482	8.7894	8.26316	72.823	43.0295	43.0193	10.128	43.6556	42.7337	54.2937	63.074	18.9203	14.9671	42.2653	60.1313	53.6853	53.7363	0.262704	0.390865	33.1894	33.1735	62.4889	63.2897
Max	UN Intermediate region	Eastern Africa	4.49173e+08	0.279295	9.74197	45.6429	1.66617	45.2114	1.62691	19.6075	5.06713	96.3003	3.61476	1.32212	2.71287	22.9274	0.126369	71.9303	17.6785	9.07344	9.74197	51.3074	33.5265	12.501	9.80252	8.7424	73.024	45.1018	45.6429	10.7362	48.1901	44.5142	59.4481	82.9088	19.3257	15.3257	48.3405	67.5399	57.0453	57.9481	10.7352	10.4489	38.0141	38.2813	85.5557	84.6051
Mean	UN Intermediate region	Middle Africa	1.84574e+08	0.273375	8.89839	42.3412	1.29192	44.9875	1.06469	17.8313	8.58406	99.9692	0	0.0307622	0.0644318	19.1036	0.102995	60.1154	17.4981	9.55406	8.89839	49.9823	30.4072	8.5197	9.66923	8.79574	72.7786	42.7526	42.3412	9.99066	42.8116	42.1693	53.0714	44.4103	18.8479	14.8994	40.6857	58.0301	36.509	36.5583	13.4437	13.4237	36.7477	36.6923	71.1921	71.201
Min	UN Intermediate region	Middle Africa	1.84574e+08	0.273375	6.51377	34.1561	1.1185	35.5189	0.820932	12.9601	4.32206	99.2791	0	0	0	12.1054	0.0682009	51.5752	16.8928	7.13274	6.51377	46.0368	22.725	4.57163	6.47878	6.7489	72.1976	35.4601	34.1561	8.22241	33.5474	35.3715	34.5207	32.1937	17.1663	13.7652	33.6603	48.0506	17.9653	18.5176	0.0327575	0.0316009	27.0241	26.5984	39.9147	39.9171
Lower quartile	UN Intermediate region	Middle Africa	1.84574e+08	0.273375	8.46263	41.4478	1.2508	43.0071	1.00937	16.5183	7.75562	99.9683	0	0	0.00525244	17.4414	0.0937034	58.6546	17.3941	9.12134	8.46263	49.4832	29.1358	7.6648	9.14784	8.41512	72.6715	41.9091	41.4478	9.74837	41.7696	41.2714	50.1325	42.4701	18.6735	14.7558	38.948	55.586	33.8709	33.6945	3.03504	3.03012	35.1149	35.0528	65.8541	65.8254
Median	UN Intermediate region	Middle Africa	1.84574e+08	0.273375	8.86564	42.3437	1.28872	44.916	1.05998	17.6585	8.56351	100	0	0	0.0239988	18.927	0.101602	60.097	17.5011	9.54702	8.86564	49.9806	30.4283	8.52365	9.64544	8.78117	72.7777	42.7876	42.3437	9.98759	42.8324	42.1906	53.0365	44.44	18.851	14.9021	40.6522	58.0666	36.7383	36.8126	6.6084	6.63282	36.739	36.6572	72.3447	72.4034
Upper quartile	UN Intermediate region	Middle Africa	1.84574e+08	0.273375	9.2966	43.2697	1.33136	46.9001	1.11382	19.0139	9.4182	100	0	0.0317145	0.0688224	20.5787	0.111094	61.6096	17.6033	9.98296	9.2966	50.4791	31.6708	9.37277	10.1756	9.1523	72.8877	43.622	43.2697	10.2413	43.8743	43.0799	55.9396	46.3478	19.0243	15.0436	42.3793	60.457	39.4069	39.6594	21.4029	21.3661	38.3332	38.2877	77.7609	77.7154
Max	UN Intermediate region	Middle Africa	1.84574e+08	0.273375	12.563	56.1703	1.48422	54.1321	1.4084	26.1262	13.0471	100	0	0.720931	0.870948	30.1546	0.158123	68.1453	17.9849	11.9322	12.563	53.9064	38.2969	12.2031	13.3995	11.2697	73.3416	51.3146	56.1703	11.7186	53.7517	48.5951	74.0021	61.5785	20.2052	16.0932	47.8279	68.1255	50.0103	54.6044	81.3325	81.3325	48.007	46.5646	92.7647	92.6229
Mean	UN Intermediate region	NA	6.07383e+09	0.19324	11.0874	43.9698	0.35669	89.1644	0.402002	30.9065	57.1522	54.6721	40.1464	5.18148	53.5058	19.1019	0.102661	51.0359	17.5006	10.6931	11.0874	50.0005	30.2683	8.49908	10.7847	10.5254	72.7835	42.6511	43.9698	9.99829	42.4688	42.1137	52.9895	61.5505	18.8416	14.9007	40.7408	58.0772	9.54097	9.54324	0.0182635	0.0362734	46.8454	46.8218	63.7946	64.1726
Min	UN Intermediate region	NA	6.07383e+09	0.19324	10.7706	43.3854	0.349688	88.686	0.3905	29.9435	56.2535	52.3824	38.0992	4.43249	51.1514	17.8001	0.0954497	48.7585	17.4016	10.2776	10.7706	49.5028	29.2086	8.23934	10.1973	10.0454	72.7093	41.6218	43.3854	9.71959	41.1017	40.6759	50.1797	60.2146	18.6424	14.6936	40.2673	57.3067	8.60349	8.68659	0.0142237	0.0280555	43.3587	44.0246	57.7849	59.8334
Lower quartile	UN Intermediate region	NA	6.07383e+09	0.19324	11.0319	43.85	0.355343	89.0839	0.399581	30.7229	56.9687	54.2826	39.7595	5.00906	53.0847	18.8342	0.101249	50.6211	17.4865	10.6095	11.0319	49.9081	30.0596	8.45595	10.6867	10.4363	72.769	42.47	43.85	9.95307	42.2276	41.8937	52.4955	61.3085	18.8086	14.8756	40.65	57.9513	9.36586	9.36409	0.0173165	0.0343846	46.3116	46.2534	63.0761	63.4471
Median	UN Intermediate region	NA	6.07383e+09	0.19324	11.0873	43.9699	0.356685	89.1632	0.401963	30.9079	57.1562	54.6702	40.1406	5.16726	53.5032	19.092	0.102626	51.0276	17.501	10.6918	11.0873	50.0022	30.2673	8.49902	10.784	10.5234	72.7836	42.6518	43.9699	9.99968	42.4581	42.1129	52.9895	61.5476	18.8413	14.9008	40.7419	58.0791	9.53781	9.54364	0.018187	0.0361627	46.8429	46.8134	63.8071	64.1878
Upper quartile	UN Intermediate region	NA	6.07383e+09	0.19324	11.1412	44.0935	0.358032	89.2468	0.404415	31.0895	57.3369	55.0571	40.5304	5.3407	53.9246	19.3675	0.104002	51.4487	17.5147	10.7726	11.1412	50.0929	30.4768	8.54381	10.8796	10.6129	72.798	42.8343	44.0935	10.0454	42.6992	42.3291	53.4812	61.7915	18.8744	14.9259	40.8264	58.2039	9.71651	9.71949	0.0191627	0.0380419	47.4024	47.3961	64.5311	64.9216
Max	UN Intermediate region	NA	6.07383e+09	0.19324	11.3825	44.6644	0.365477	89.5835	0.414872	31.8994	58.297	56.7544	42.2597	6.47325	55.7156	20.4995	0.111592	53.1636	17.5727	11.1559	11.3825	50.4782	31.5981	8.72912	11.3824	11.01	72.8581	43.6666	44.6644	10.2768	44.2794	43.3154	56.0403	62.8406	19.0497	15.0531	41.2099	58.7388	10.5227	10.4768	0.0243992	0.0471779	50.2321	49.8009	68.1289	68.8311
Mean	UN Intermediate region	South America	4.31195e+08	0.214821	11.6612	44.5475	0.275737	87.6336	0.312214	10.359	78.8559	97.6383	0	2.36173	16.984	19.1116	0.102736	32.933	17.5005	10.9389	11.6612	49.9997	30.3442	8.50387	11.6007	11.3296	72.783	44.4059	44.5475	9.99782	44.3132	44.4775	53.008	52.0213	18.8375	14.9001	40.7473	58.0964	3.8259	3.82878	0.841818	1.12468	66.4738	66.4602	68.7991	69.3501
Min	UN Intermediate region	South America	4.31195e+08	0.214821	11.0969	43.7619	0.266031	86.6093	0.292421	8.96325	77.5456	95.6874	0	1.74289	12.2809	15.9414	0.087066	31.1291	17.3956	10.3425	11.0969	48.7702	26.6855	7.08352	10.2753	10.5794	72.6713	43.7601	43.7619	9.29642	40.3728	43.3802	45.2154	47.5168	18.3145	14.2506	38.2113	54.6204	2.80211	2.64393	0.54646	0.760568	58.3095	61.6128	65.2809	65.9984
Lower quartile	UN Intermediate region	South America	4.31195e+08	0.214821	11.5658	44.4257	0.273933	87.4749	0.308108	10.0794	78.6439	97.5506	0	2.1448	15.9512	18.3649	0.0987259	32.5898	17.4801	10.8386	11.5658	49.7633	29.7335	8.2541	11.3615	11.2013	72.761	44.2948	44.4257	9.87469	44.0301	44.3232	51.5946	51.0288	18.7487	14.8288	40.3133	57.3484	3.66241	3.65757	0.774905	1.04024	66.166	66.1382	68.2373	68.8259
Median	UN Intermediate region	South America	4.31195e+08	0.214821	11.6572	44.5497	0.27571	87.6388	0.31198	10.3395	78.8608	97.7329	0	2.26714	16.9038	19.0589	0.102394	32.9285	17.5005	10.9379	11.6572	50.001	30.3539	8.50064	11.5946	11.3233	72.7836	44.4096	44.5497	9.9952	44.3271	44.4806	53.0448	51.9953	18.8359	14.9007	40.7558	58.1009	3.83449	3.84406	0.838933	1.11934	66.5061	66.4877	68.8176	69.3558
Upper quartile	UN Intermediate region	South America	4.31195e+08	0.214821	11.7542	44.6704	0.277493	87.795	0.316035	10.6175	79.077	97.8552	0	2.44941	17.9191	19.7921	0.106417	33.2723	17.5209	11.0337	11.7542	50.2391	30.9662	8.74816	11.8345	11.4527	72.8047	44.5137	44.6704	10.1178	44.6241	44.6327	54.3866	52.9692	18.928	14.9707	41.1842	58.8245	3.99925	4.00685	0.901099	1.20621	66.8231	66.815	69.3735	69.8913
Max	UN Intermediate region	South America	4.31195e+08	0.214821	12.2092	45.3982	0.285978	88.5091	0.33801	12.1479	79.8591	98.2571	0	4.31259	22.3911	23.3135	0.126575	34.7646	17.6084	11.6596	12.2092	51.3331	33.6659	9.634	13.1365	12.0849	72.8973	45.0521	45.3982	10.6945	46.2089	45.6773	63.1511	59.5036	19.4949	15.4311	43.0409	62.0399	4.611	4.72743	1.30485	1.62702	68.21	68.151	71.8923	72.0169
Mean	UN Intermediate region	Southern Africa	6.72696e+07	0.218538	11.5931	44.2813	0.3744	82.0946	0.305989	10.6261	35.8343	91.0026	0	8.9974	6.71464	19.2109	0.102703	35.3802	17.4994	11.4658	11.5931	50.009	30.4125	8.52636	12.0784	11.548	72.7866	44.1915	44.2813	9.99347	44.3494	43.9386	53.008	44.3811	18.8343	14.8991	40.7632	58.0946	7.02642	7.05592	0.0149075	0.0147221	64.5468	64.5752	67.5095	67.5055
Min	UN Intermediate region	Southern Africa	6.72696e+07	0.218538	9.59417	41.2396	0.326087	74.4947	0.241329	7.07803	27.6759	86.6512	0	5.01647	4.28994	8.98679	0.0477503	28.7862	17.0503	9.27513	9.59417	44.3794	21.3872	4.50577	6.0337	8.993	72.3841	40.5468	41.2396	7.6254	36.0952	39.3558	32.5488	30.5887	17.2585	13.6879	33.1239	47.0452	3.0648	2.78115	0	0	52.8716	51.6576	43.3716	43.3716
Lower quartile	UN Intermediate region	Southern Africa	6.72696e+07	0.218538	11.1888	43.8706	0.363646	81.0602	0.290825	9.7759	34.3193	90.2364	0	8.20263	6.13839	15.6739	0.0836701	33.9402	17.4201	11.056	11.1888	49.0215	28.6887	7.35255	10.7801	11.0168	72.704	43.7112	43.8706	9.51106	43.3557	43.3021	48.9375	41.716	18.5885	14.711	38.4712	54.8591	6.13183	6.1148	0.00400795	0.00400133	63.1795	63.2013	61.2499	61.3182
Median	UN Intermediate region	Southern Africa	6.72696e+07	0.218538	11.5655	44.2776	0.373768	82.1913	0.304373	10.5511	35.778	91.0221	0	8.9779	6.69119	18.7735	0.0997377	35.287	17.4998	11.4666	11.5655	50.0201	30.4127	8.55806	11.9578	11.5362	72.7875	44.2037	44.2776	9.99821	44.358	43.9418	52.8636	44.4166	18.8334	14.8895	40.7755	58.163	6.97341	7.01003	0.0107856	0.0104673	64.7515	64.7775	67.7678	67.8359
Upper quartile	UN Intermediate region	Southern Africa	6.72696e+07	0.218538	11.9722	44.6891	0.385257	83.2806	0.32035	11.3454	37.2511	91.7974	0	9.76361	7.24289	22.2311	0.118845	36.7652	17.5803	11.88	11.9722	50.9738	32.1761	9.70893	13.243	12.0666	72.8702	44.6722	44.6891	10.4846	45.3419	44.6086	57.1522	46.925	19.0753	15.0956	43.0861	61.2544	7.90578	7.91243	0.0211933	0.0208398	66.1179	66.2291	73.9936	74.0132
Max	UN Intermediate region	Southern Africa	6.72696e+07	0.218538	14.5136	46.7537	0.433083	86.3264	0.40686	15.7173	43.063	94.9835	0	13.3488	10.1228	36.9479	0.209691	42.6743	17.9614	14.309	14.5136	55.6769	40.2046	12.658	20.3237	14.7713	73.2314	47.7645	46.7537	12.7095	50.2641	48.5143	74.3761	57.3102	20.3484	16.0579	48.3834	69.208	11.6698	11.6137	0.184486	0.147989	72.0428	71.6813	90.1666	90.1666
Mean	UN Intermediate region	Western Africa	4.07987e+08	0.188295	10.5427	41.0857	1.06714	47.7073	0.882509	18.8758	2.70707	99.1896	0	0.81041	0.000176436	19.1096	0.102615	61.1905	17.4991	11.4687	10.5427	50.007	30.3576	8.48324	11.5375	10.7775	72.784	40.688	41.0857	10.0003	40.5002	40.7974	52.9665	44.3666	18.8396	14.902	40.7428	58.0729	31.4661	31.4486	39.7937	39.7964	39.2134	39.1949	82.3539	82.3531
Min	UN Intermediate region	Western Africa	4.07987e+08	0.188295	9.47466	39.0247	1.02791	46.3568	0.811816	16.815	2.57773	98.7752	0	0.623366	0	16.3093	0.0866216	57.5206	17.3219	9.98383	9.47466	48.7616	26.486	4.53757	9.92348	9.64711	72.5801	38.4132	39.0247	9.39786	37.6653	38.9692	45.5009	29.0129	18.1008	14.4149	33.1064	47.4543	26.0325	26.1902	28.0741	28.0741	32.252	34.0166	71.1108	71.1108
Lower quartile	UN Intermediate region	Western Africa	4.07987e+08	0.188295	10.2972	40.6986	1.0599	47.4424	0.867766	18.41	2.68386	99.1499	0	0.7612	2.7856e-06	18.4349	0.0990516	60.2798	17.4634	11.0246	10.2972	49.7983	29.8503	7.37856	10.9821	10.4776	72.7465	40.1447	40.6986	9.89745	39.8771	40.3971	51.7639	41.8716	18.7668	14.8448	38.6306	55.0489	30.7893	30.7495	35.9426	35.9667	38.4468	38.3939	77.2096	77.1782
Median	UN Intermediate region	Western Africa	4.07987e+08	0.188295	10.5134	41.0953	1.06704	47.7061	0.882417	18.8317	2.70703	99.1995	0	0.800495	2.85606e-05	19.0374	0.102199	61.184	17.4989	11.4812	10.5134	50.0039	30.3643	8.47321	11.4399	10.7905	72.7835	40.6485	41.0953	9.99881	40.5002	40.78	52.941	44.3292	18.8397	14.9016	40.6668	58.1838	31.5725	31.5791	39.7949	39.7873	39.2074	39.175	82.512	82.5177
Upper quartile	UN Intermediate region	Western Africa	4.07987e+08	0.188295	10.7591	41.4693	1.07404	47.9709	0.896834	19.2925	2.72985	99.2388	0	0.850118	0.000179139	19.7163	0.105869	62.1256	17.5346	11.9103	10.7591	50.213	30.8817	9.60419	12.0195	11.0764	72.8212	41.2162	41.4693	10.1044	41.1281	41.2046	54.1833	46.8433	18.9098	14.9572	42.854	61.0547	32.2711	32.2765	43.2619	43.2666	39.9588	39.9718	87.5617	87.5524
Max	UN Intermediate region	Western Africa	4.07987e+08	0.188295	12.221	43.5399	1.1099	49.1475	0.965934	22.4102	2.81785	99.3766	0	1.22485	0.00328642	23.2186	0.129961	65.3229	17.6995	12.8747	12.221	51.3427	34.2274	12.5602	14.5898	11.8827	72.9791	43.3284	43.5399	10.6753	43.5075	42.7316	61.2979	59.1821	19.4384	15.6148	48.3645	69.4044	34.9587	34.8944	57.9842	57.9842	43.7986	45.1821	93.3909	93.3909
Mean	OECD region	Canada	3.75117e+07	0.23799	11.3107	61.6875	0.0678177	100	0.0525505	48.587	100	62.7798	34.8958	2.32431	99.6819				17.4974		11.3107		2.30153	8.49856			72.7811		61.6875				53.0369	61.6914	18.8374	14.9019	40.7454	58.0792	0	0	0	0
Min	OECD region	Canada	3.75117e+07	0.23799	9.76588	56.1621	0.0583006	100	0.0423504	35.5598	100	47.144	16.4781	0.564262	99.5528				17.0335		9.76588		1.65832	7.48162			72.3087		56.1621				35.9024	55.3135	17.4892	13.9981	38.7701	54.959	0	0	0	0
Lower quartile	OECD region	Canada	3.75117e+07	0.23799	11.0329	61.0386	0.0659802	100	0.050558	45.9441	100	59.6523	31.5345	1.5998	99.6594				17.413		11.0329		2.18131	8.31161			72.6951		61.0386				49.4177	60.6732	18.6224	14.7215	40.3775	57.5313	0	0	0	0
Median	OECD region	Canada	3.75117e+07	0.23799	11.304	61.6957	0.067764	100	0.0525379	48.4207	100	62.8903	34.8009	2.16976	99.6835				17.499		11.304		2.30623	8.49988			72.7802		61.6957				53.0956	61.6909	18.8335	14.8981	40.7489	58.0811	0	0	0	0
Upper quartile	OECD region	Canada	3.75117e+07	0.23799	11.5828	62.328	0.069663	100	0.0545043	51.0518	100	66.0018	38.147	2.90819	99.7055				17.5816		11.5828		2.41917	8.68988			72.8651		62.328				56.6242	62.7303	19.0644	15.084	41.1086	58.6222	0	0	0	0
Max	OECD region	Canada	3.75117e+07	0.23799	12.8625	66.2568	0.0774796	100	0.0639047	64.5754	100	80.7759	50.6971	6.96254	99.7832				17.8775		12.8625		2.91552	9.37676			73.178		66.2568				70.3983	67.2391	19.9582	16.0295	42.8409	60.8231	0	0	0	0
Mean	OECD region	China	1.43115e+09	0.163004	12.1686	44.4119	0.299563	94.165	0.414286	51.3378	99.474	26.424	71.3149	2.26111	4.59421	19.0882	0.10265	33.3133	17.5019	11.5029	12.1686	49.9999	30.3759	8.4627	11.5064	11.6471	72.7844	44.3964	44.4119	10.0015	44.3981	44.3963	53.0032	61.5602	18.8415	14.9003	40.7041	58.1287	2.90568	2.90667	0.00040845	0.000833653	66.6316	66.639	65.8613	65.8595
Min	OECD region	China	1.43115e+09	0.163004	11.5167	43.5272	0.286639	93.8057	0.388957	49.8111	99.4199	23.6506	68.2059	1.63805	4.03957	17.2744	0.0916256	31.9193	17.3416	10.7868	11.5167	48.9036	27.9573	4.30405	10.7212	10.9252	72.6166	43.7048	43.5272	9.49959	43.112	43.6586	46.5851	29.7834	18.4128	14.533	32.8365	46.9137	2.40626	2.31642	0	0	64.493	64.1619	38.2136	38.2136
Lower quartile	OECD region	China	1.43115e+09	0.163004	12.0418	44.2821	0.297039	94.0966	0.407947	51.0412	99.4649	25.8153	70.7845	2.08596	4.49755	18.716	0.100794	33.0348	17.4688	11.3885	12.0418	49.8776	29.9603	7.30417	11.3479	11.5323	72.7489	44.2931	44.2821	9.93827	44.2609	44.2828	51.9932	55.8571	18.7778	14.8499	38.3915	54.8179	2.8241	2.82377	7.14619e-07	1.39099e-06	66.3211	66.3184	57.8441	57.8172
Median	OECD region	China	1.43115e+09	0.163004	12.1697	44.4137	0.29962	94.1666	0.414151	51.3334	99.4743	26.3882	71.3468	2.23558	4.60019	19.0819	0.102633	33.3142	17.5013	11.5062	12.1697	49.9975	30.3697	8.45961	11.5067	11.6462	72.7848	44.397	44.4137	10.003	44.3935	44.3951	53.008	61.5588	18.84	14.9011	40.7026	58.0397	2.91355	2.91175	6.781e-05	0.000135033	66.645	66.6589	66.548	66.4934
Upper quartile	OECD region	China	1.43115e+09	0.163004	12.2912	44.5476	0.302165	94.2365	0.420532	51.6364	99.4835	26.9948	71.8848	2.40419	4.69602	19.4343	0.104521	33.5805	17.5349	11.6126	12.2912	50.1252	30.7936	9.59813	11.6592	11.7628	72.8203	44.499	44.5476	10.0649	44.5351	44.504	54.0019	67.3839	18.9052	14.9492	42.9872	61.4087	2.99201	2.9986	0.000425199	0.000900329	66.9639	66.9676	74.8785	74.8745
Max	OECD region	China	1.43115e+09	0.163004	12.8772	45.3261	0.311068	94.5001	0.447698	52.9897	99.5176	29.4807	73.9902	3.2893	5.05056	21.5767	0.124299	34.7235	17.6562	12.0953	12.8772	50.8526	32.8764	12.4875	12.5912	12.3997	72.9825	45.0755	45.3261	10.4633	45.6662	45.2092	59.0394	93.0339	19.407	15.2726	48.7385	69.135	3.36211	3.34841	0.00885022	0.0156621	68.6602	68.5733	89.7067	89.7067
Mean	OECD region	Eurasia	1.63629e+06	0.607424	12.4109	44.3991	0.422075	88.7943	0.486681	6.77527	23.0141	100	0	0	0	19.0728	0.102786	31.1097	17.5013	11.7618	12.4109	49.9939	30.3894		12.4345	11.9688	72.7845	44.4069	44.3991	10.0008	44.4114	44.4075	52.8817		18.8408	14.9009			5.56857	5.58821			68.4406	68.438
Min	OECD region	Eurasia	1.63629e+06	0.607424	8.37975	40.4724	0.365681	86.2343	0.334741	3.45616	18.2752	100	0	0	0	8.54831	0.0458836	22.9367	16.2493	8.22724	8.37975	45.5933	15.9746		7.59255	8.35068	71.6848	40.761	40.4724	7.65737	38.9406	40.7488	26.6901		16.7634	13.2075			2.06198	1.88781			54.2971	57.6672
Lower quartile	OECD region	Eurasia	1.63629e+06	0.607424	11.7703	43.6764	0.410291	88.3728	0.450977	5.91288	21.9237	100	0	0	0	16.7206	0.0894572	29.4395	17.3047	11.0536	11.7703	49.2231	28.0153		11.6255	11.2624	72.579	43.7473	43.6764	9.60454	43.5831	43.7102	47.5431		18.5144	14.6232			4.72069	4.71832			66.2705	66.1398
Median	OECD region	Eurasia	1.63629e+06	0.607424	12.4177	44.393	0.422106	88.8149	0.48433	6.66315	22.9424	100	0	0	0	18.8581	0.101816	31.1234	17.5061	11.7403	12.4177	49.9919	30.4086		12.4452	11.9578	72.7878	44.4309	44.393	10.0095	44.427	44.4255	52.8932		18.8363	14.9072			5.53887	5.5482			68.447	68.475
Upper quartile	OECD region	Eurasia	1.63629e+06	0.607424	13.0618	45.1087	0.433942	89.2477	0.523268	7.5289	24.0153	100	0	0	0	21.2276	0.114577	32.7616	17.7018	12.463	13.0618	50.7744	32.7838		13.2224	12.6684	72.9889	45.0606	45.1087	10.3836	45.2358	45.0903	58.4663		19.1782	15.1714			6.37201	6.41336			70.6286	70.6948
Max	OECD region	Eurasia	1.63629e+06	0.607424	15.7219	48.2551	0.483459	90.749	0.704566	12.2997	28.5201	100	0	0	0	33.7651	0.180802	38.7576	18.5615	15.6307	15.7219	53.909	41.5703		17.3682	15.8502	73.7942	47.9359	48.2551	12.2044	49.3552	47.8862	81.7802		21.0141	16.371			10.313	10.8476			78.455	80.1828
Mean	OECD region	India	1.39645e+09	0.167023	9.99811	41.7901	0.64217	81.4082	0.760683	18.5172	2.45487	82.0014	0	17.9986	0	19.1076	0.102653	56.55	17.5	9.90737	9.99811	50	30.3776		10.0973	9.92274	72.783	41.8211	41.7901	9.99873	41.799	41.8053	52.9927		18.8431	14.8998			12.3084	12.3083			43.4432	43.4195
Min	OECD region	India	1.39645e+09	0.167023	9.38196	40.3042	0.62428	79.9643	0.718303	16.883	2.0359	77.6289	0	14.5359	0	17.1161	0.0916857	52.0748	17.3438	8.92705	9.38196	49.0499	27.8356		9.05227	9.03579	72.6238	38.0922	40.3042	9.50399	38.9026	38.8131	47.1815		18.4734	14.6416			10.5635	10.4697			38.7203	38.4303
Lower quartile	OECD region	India	1.39645e+09	0.167023	9.87351	41.4841	0.63842	81.1366	0.752203	18.2111	2.38485	81.2338	0	17.2013	0	18.6835	0.10022	55.6712	17.4697	9.71306	9.87351	49.8565	30.0148		9.91518	9.73916	72.7526	41.3745	41.4841	9.92597	41.3536	41.3651	52.1504		18.7863	14.8561			11.9563	11.9546			42.5445	42.5098
Median	OECD region	India	1.39645e+09	0.167023	9.99437	41.7942	0.642057	81.4105	0.76054	18.5139	2.46651	82.0443	0	17.9557	0	19.0895	0.102529	56.5345	17.5	9.89738	9.99437	50.0014	30.374		10.0857	9.91376	72.7832	41.8238	41.7942	9.99828	41.8023	41.788	52.983		18.8429	14.9003			12.2989	12.3089			43.4391	43.4263
Upper quartile	OECD region	India	1.39645e+09	0.167023	10.1182	42.0903	0.645856	81.6798	0.76888	18.8104	2.54011	82.7987	0	18.7662	0	19.5281	0.104849	57.446	17.531	10.0803	10.1182	50.1428	30.7482		10.2744	10.0937	72.8137	42.2804	42.0903	10.0729	42.2331	42.2488	53.8372		18.8994	14.9452			12.6561	12.6587			44.3664	44.3551
Max	OECD region	India	1.39645e+09	0.167023	10.6444	43.4431	0.662886	82.8289	0.812484	20.146	2.67196	85.4641	0	22.3711	0	21.4788	0.116001	60.651	17.6831	11.1668	10.6444	50.87	32.5645		11.3106	11.105	72.9544	45.3655	43.4431	10.4327	44.9008	44.8171	57.9685		19.1788	15.1432			14.1302	14.4184			48.3731	48.3568
Mean	OECD region	Latin America	4.49355e+08	0.203492	11.5094	44.1301	0.356568	84.1002	0.362057	9.63267	73.4583	97.3889	0	2.61105	6.78946	19.1009	0.102761	39.1864	17.4999	10.9563	11.5094	49.9994	30.3603	8.50515	11.553	11.239	72.7826	44.0076	44.1301	9.99835	43.8978	43.5523	53.0142	54.779	18.8372	14.9003	40.7487	58.0739	6.14018	6.14711	0.825874	1.22516	55.9338	55.9184	65.8109	66.6811
Min	OECD region	Latin America	4.49355e+08	0.203492	11.0747	43.0125	0.343997	83.0676	0.335433	8.54298	72.098	95.2645	0	1.95062	4.61777	16.2639	0.0870655	36.8103	17.3717	10.4881	11.0747	48.905	27.007	7.10848	10.4809	10.6274	72.6454	43.022	43.0125	9.33073	40.6448	41.4175	45.6776	45.3298	18.3406	14.3486	38.1779	52.4698	4.3947	4.29157	0.473124	0.539523	48.1642	48.9914	55.231	59.3393
Lower quartile	OECD region	Latin America	4.49355e+08	0.203492	11.4192	43.9747	0.354064	83.9349	0.357621	9.37473	73.2335	97.297	0	2.3772	6.03017	18.4595	0.099282	38.787	17.4734	10.8647	11.4192	49.788	29.8259	8.25063	11.3534	11.125	72.7549	43.8384	43.9747	9.88683	43.5691	43.201	51.7722	53.346	18.7581	14.8381	40.2331	57.4285	5.87803	5.8689	0.741833	1.0932	55.2173	55.1777	65.0546	66.0203
Median	OECD region	Latin America	4.49355e+08	0.203492	11.5067	44.1327	0.35648	84.1038	0.361877	9.60876	73.4625	97.4914	0	2.50859	6.51677	19.0635	0.102476	39.1964	17.4996	10.954	11.5067	50.0037	30.3578	8.50109	11.5434	11.2351	72.7827	44.009	44.1327	9.99889	43.9191	43.557	53.0376	54.9053	18.8378	14.8994	40.7321	58.078	6.14037	6.14752	0.826602	1.25207	56.0373	56.0242	65.9858	66.7546
Upper quartile	OECD region	Latin America	4.49355e+08	0.203492	11.5958	44.2879	0.359013	84.2727	0.366224	9.86814	73.6866	97.6228	0	2.70303	7.35559	19.7047	0.106012	39.5844	17.5265	11.044	11.5958	50.2117	30.9187	8.75695	11.7498	11.353	72.811	44.1805	44.2879	10.1091	44.2334	43.9009	54.295	56.3093	18.9177	14.9639	41.2614	58.7007	6.40507	6.42421	0.906864	1.36979	56.7454	56.7505	66.7269	67.3987
Max	OECD region	Latin America	4.49355e+08	0.203492	12.031	45.0428	0.371956	84.9091	0.392519	11.0912	74.6015	98.0494	0	4.73546	10.9349	22.5525	0.122844	41.1891	17.6409	11.5829	12.031	51.154	33.5744	9.87802	12.9299	11.9761	72.9212	45	45.0428	10.5539	46.1383	45.6277	59.9023	62.8776	19.5032	15.4141	43.3624	62.8412	7.57802	7.84315	1.24558	1.77791	59.1672	59.6345	69.522	70.2511
Mean	OECD region	Middle East and North Africa	4.6964e+08	0.119506	10.9771	43.3824	0.289508	88.423	0.412824	10.7977	34.9981	92.6696	0	7.3304	20.4361	19.1044	0.102838	47.5507	17.4993	10.7973	10.9771	50.0032	30.318	8.5077	10.7555	10.2686	72.7837	42.8831	43.3824	9.99337	44.0366	42.0982	52.9875	60.1645	18.8397	14.9014	40.7795	58.0635	5.46065	5.46707	0.0445283	0.0817552	52.18	52.0686	63.9217	64.6657
Min	OECD region	Middle East and North Africa	4.6964e+08	0.119506	9.91853	40.7166	0.268565	86.8161	0.370623	9.25096	32.0056	87.6203	0	4.95972	13.5593	15.558	0.0848057	37.5672	17.1812	9.00348	9.91853	48.2453	27.123	6.46615	9.06214	8.77589	72.4532	39.8208	40.7166	9.17435	40.3273	38.8142	44.6846	46.2291	18.2901	14.4688	36.4945	52.4448	4.13185	3.80263	0.0130983	0.023334	40.354	38.6096	23.3641	28.1228
Lower quartile	OECD region	Middle East and North Africa	4.6964e+08	0.119506	10.7763	42.9695	0.285395	88.1411	0.403896	10.4233	34.4726	92.024	0	6.44258	18.3173	18.3216	0.0985152	45.0882	17.4392	10.4036	10.7763	49.7416	29.7011	8.05551	10.4385	9.87998	72.7194	42.3997	42.9695	9.86305	43.3461	41.4509	51.5297	57.7999	18.7489	14.8256	39.907	56.8685	5.15578	5.16097	0.0339502	0.0635501	50.3704	50.2279	61.9634	62.6421
Median	OECD region	Middle East and North Africa	4.6964e+08	0.119506	10.9702	43.3782	0.289304	88.4331	0.412338	10.7774	35.0163	92.914	0	7.08597	20.1171	19.0476	0.102568	47.5172	17.4998	10.7823	10.9702	50.011	30.3114	8.51849	10.7435	10.2436	72.7825	42.8894	43.3782	9.99465	43.9369	42.1076	53.0125	60.1347	18.8386	14.9033	40.7992	58.0951	5.4364	5.45153	0.0428628	0.0787528	52.3171	52.2382	64.5278	64.9149
Upper quartile	OECD region	Middle East and North Africa	4.6964e+08	0.119506	11.1756	43.8064	0.2935	88.7133	0.421568	11.1305	35.5289	93.5574	0	7.97604	22.2239	19.8483	0.106823	50.0468	17.5589	11.1672	11.1756	50.2639	30.9285	8.95264	11.054	10.6294	72.8492	43.3702	43.8064	10.1233	44.5943	42.7495	54.4408	62.6077	18.93	14.9757	41.654	59.2351	5.74507	5.75515	0.0525852	0.0968646	54.1704	54.1186	66.8009	67.0747
Max	OECD region	Middle East and North Africa	4.6964e+08	0.119506	12.0743	45.7643	0.312981	89.7994	0.46301	12.9192	38.3767	95.0403	0	12.3797	30.7618	24.187	0.124793	57.0672	17.8163	12.7572	12.0743	51.5699	33.5802	10.6151	12.7549	12.349	73.1232	46.6247	45.7643	10.8282	52.4452	45.7706	62.0902	72.5645	19.3789	15.5303	44.7505	63.5469	7.28734	7.33454	0.195487	0.235145	63.1359	63.8383	76.4533	76.0288
Mean	OECD region	OECD EU countries	4.14585e+08	0.291603	12.191	61.7046	0.0787351	99.9672	0.0805999	39.6505	100	50.9763	42.2069	6.81684	99.6072			66.0502	17.5	11.7188	12.191		2.29971	8.50188		11.7217	72.7834	61.6846	61.7046			61.6758	52.9802	61.6933	18.8384	14.8995	40.7433	58.0758	0.00197126	0.00196857	0.00261291	0.00261129	33.9284	33.9432	33.9739	33.9809
Min	OECD region	OECD EU countries	4.14585e+08	0.291603	11.6019	60.4823	0.0756139	99.9447	0.0759593	36.8707	100	47.3573	37.6134	5.30791	99.5575			52.4033	17.3406	8.44864	11.6019		2.14264	8.17955		8.63401	72.6372	52.0085	60.4823			53.8138	47.7697	59.8814	18.5172	14.5854	40.143	57.0859	0.000851448	0.000831462	0.00139503	0.00146442	13.5428	14.9731	18.5551	18.6547
Lower quartile	OECD region	OECD EU countries	4.14585e+08	0.291603	12.0694	61.4673	0.0781422	99.9642	0.0795516	39.0918	100	50.2339	41.4209	6.52255	99.5986			63.5643	17.4735	11.2116	12.0694		2.26824	8.44733		11.2568	72.7545	60.5139	61.4673			60.5252	52.0239	61.4024	18.7777	14.8526	40.6367	57.9224	0.00162184	0.00161639	0.00230258	0.00228471	30.4634	30.5249	30.8519	30.8501
Median	OECD region	OECD EU countries	4.14585e+08	0.291603	12.1854	61.7086	0.0787027	99.9679	0.0805882	39.6487	100	50.9978	42.1829	6.80766	99.6073			66.032	17.4999	11.682	12.1854		2.2994	8.50247		11.7001	72.7831	61.6701	61.7086			61.6879	52.9755	61.6882	18.8378	14.8999	40.7416	58.079	0.00190731	0.00190557	0.0025803	0.00258656	33.9568	33.8941	33.865	33.9199
Upper quartile	OECD region	OECD EU countries	4.14585e+08	0.291603	12.3081	61.9432	0.0793297	99.9709	0.0815894	40.1968	100	51.6818	43.0022	7.0972	99.6157			68.5667	17.5269	12.1841	12.3081		2.33127	8.55585		12.1383	72.8124	62.8829	61.9432			62.8059	53.9242	61.9814	18.8977	14.9479	40.8514	58.2328	0.00225676	0.00224267	0.00289037	0.00288245	37.289	37.4325	37.0227	37.0874
Max	OECD region	OECD EU countries	4.14585e+08	0.291603	12.9211	63.0772	0.0830209	99.9813	0.0871826	43.1512	100	54.9618	46.218	8.53258	99.6552			80.348	17.6239	16.1983	12.9211		2.45396	8.84126		15.186	72.9358	72.8117	63.0772			68.9754	57.8287	63.8124	19.2155	15.1696	41.4197	58.9889	0.00569008	0.00524218	0.00454553	0.00468737	54.5914	52.4635	49.5556	48.7134
Mean	OECD region	OECD Non-EU countries	1.74426e+08	0.161869	12.3449	47.1574	0.14983	95.4355	0.153446	31.6766	98.2814	57.0786	34.4974	8.42393	80.7445	18.9937	0.103292	34.2426	17.5046	12.4449	12.3449	49.9855	29.901	8.49388	12.8386	12.5356	72.7819	44.4067	47.1574	9.99912	44.3756	44.4085	52.9645	61.3988	18.8365	14.8985	40.7271	58.0812	3.46487	3.47369	0.0425883	0.0845347	66.2622	66.2439	66.1298	66.1825
Min	OECD region	OECD Non-EU countries	1.74426e+08	0.161869	10.2835	44.3963	0.13358	93.6881	0.118902	28.5948	97.1863	52.0376	29.0518	5.91846	69.1385	3.32722	0.0212991	28.1115	16.9658	10.1257	10.2835	41.9528	18.4417	7.79483	4.30762	9.54748	72.1633	41.6761	44.3963	6.29503	32.7552	41.2691	29.3603	56.2987	16.9402	13.508	39.4214	55.8399	1.26545	1.00073	0.017034	0.0307977	58.6291	58.8687	54.9748	54.6781
Lower quartile	OECD region	OECD Non-EU countries	1.74426e+08	0.161869	11.9797	46.7333	0.146889	95.1785	0.146621	31.0286	98.0936	56.05	33.5001	7.93275	79.1645	11.659	0.0629299	32.9948	17.4067	12.0224	11.9797	48.1575	27.9116	8.34589	11.1325	12.0834	72.6769	43.9653	46.7333	9.04031	42.6301	43.9314	48.2536	60.6271	18.5771	14.6843	40.4363	57.6894	3.00196	2.98276	0.0352931	0.0698494	64.8171	64.8047	64.1965	64.229
Median	OECD region	OECD Non-EU countries	1.74426e+08	0.161869	12.337	47.1644	0.149764	95.4764	0.153007	31.662	98.2572	57.0868	34.4886	8.41179	80.9988	17.2935	0.0939779	34.237	17.5068	12.4499	12.337	50.0067	29.8952	8.4927	12.8921	12.5431	72.7827	44.4073	47.1644	10.0268	44.3837	44.4263	53.0001	61.3784	18.836	14.8943	40.7283	58.0845	3.46143	3.47618	0.0416067	0.0826337	66.2598	66.285	66.206	66.2316
Upper quartile	OECD region	OECD Non-EU countries	1.74426e+08	0.161869	12.7111	47.6082	0.152651	95.7277	0.159741	32.3138	98.4637	58.0897	35.5083	8.89775	82.5	24.5513	0.133828	35.435	17.6059	12.8675	12.7111	51.7861	31.8767	8.64322	14.5954	12.9851	72.8871	44.8565	47.6082	10.937	46.1412	44.8794	57.6909	62.1829	19.0967	15.1095	41.0148	58.4782	3.93299	3.96679	0.0487407	0.096804	67.7302	67.741	68.1085	68.1793
Max	OECD region	OECD Non-EU countries	1.74426e+08	0.161869	15.3909	50.3122	0.169498	96.6199	0.193241	35.8473	99.0968	63.3448	40.4831	11.2222	87.356	62.0876	0.328126	41.1073	18.0396	14.8229	15.3909	57.7083	45.1254	9.13027	22.4082	15.3087	73.3485	47.307	50.3122	14.1193	56.0748	48.3497	76.6843	66.0254	20.7505	16.3161	42.2711	60.55	5.90566	6.05315	0.0905684	0.210865	75.2913	74.2772	77.6192	77.7488
Mean	OECD region	OECD Oceania	3.06784e+07	0.475391	10.5467	61.6777	0.0633694	99.9966	0.0499862	28.6325	99.9998	89.3639	0	10.6361	99.6664	19.1323	0.10252	17.7924	17.5021	9.19025	10.5467	49.8527	2.29709	8.49622	9.19115	9.18518	72.7836	44.4907	61.6777	10.0059	44.4869	44.4899	53.0246	61.6803	18.8466	14.9024	40.7294	58.0882	0	0	0.000107053	0.000215586			82.3677	82.3639
Min	OECD region	OECD Oceania	3.06784e+07	0.475391	9.39946	58.4822	0.056867	99.9885	0.0419649	23.9603	99.9988	81.4133	0	5.27577	99.5752	0.11732	0.00670421	6.72839	17.0577	0.185584	9.39946	41.026	1.90018	7.74164	0.0263219	0.25285	72.3846	32.3004	58.4822	5.4607	32.7974	32.273	41.7416	58.2904	18.0894	14.2852	39.5639	56.0229	0	0	0	0			71.1027	71.1027
Lower quartile	OECD region	OECD Oceania	3.06784e+07	0.475391	10.3223	61.1152	0.0619585	99.9956	0.0483638	27.7017	99.9998	88.2914	0	9.46862	99.651	10.6421	0.055631	13.1727	17.4245	5.25254	10.3223	47.3924	2.22391	8.38279	5.19251	5.26049	72.7033	42.2537	61.1152	8.81401	42.1787	42.2814	50.732	61.0592	18.7079	14.7924	40.513	57.7634	0	0	3.07498e-06	6.11928e-06			77.1117	77.1335
Median	OECD region	OECD Oceania	3.06784e+07	0.475391	10.5391	61.6823	0.0633683	99.997	0.0499237	28.6218	99.9999	89.4473	0	10.5527	99.6673	17.2018	0.0914556	17.7943	17.5032	8.23043	10.5391	49.8116	2.29773	8.49791	8.17718	8.22533	72.7838	44.5223	61.6823	9.98116	44.4957	44.4955	53.0442	61.688	18.8423	14.9031	40.729	58.0811	0	0	3.3555e-05	6.72607e-05			82.3853	82.3525
Upper quartile	OECD region	OECD Oceania	3.06784e+07	0.475391	10.7704	62.239	0.064795	99.9979	0.0515443	29.5778	99.9999	90.5314	0	11.7086	99.6823	26.2025	0.13796	22.514	17.5807	12.0711	10.7704	52.3104	2.37109	8.60962	12.0318	12.041	72.8649	46.7501	62.239	11.2194	46.7526	46.7486	55.285	62.2862	18.98	15.0118	40.952	58.4163	0	0	0.000131283	0.000267441			87.6383	87.6513
Max	OECD region	OECD Oceania	3.06784e+07	0.475391	11.9278	64.8327	0.0718687	99.9999	0.059104	32.8452	100	94.7242	0	18.5867	99.7441	66.1754	0.372879	28.8333	17.9517	49.4965	11.9278	59.5093	2.70153	9.04822	48.8291	51.7304	73.203	55.7937	64.8327	14.5704	56.2098	56.035	64.3305	65.2146	19.6294	15.6193	42.0131	59.7543	0	0	0.00165737	0.00364316			93.3912	93.3912
Mean	OECD region	OECD Pacific	1.76387e+08	0.0918858	12.2807	61.7042	0.0456783	100	0.0440182	73.9479	100	27.7484	68.8986	3.353	99.3338				17.5021		12.2807		2.29983	8.49769			72.7809		61.7042				52.968	61.7302	18.8372	14.9023	40.7465	58.0711	0	0	0	0
Min	OECD region	OECD Pacific	1.76387e+08	0.0918858	9.52736	55.2583	0.0403289	100	0.0349025	64.6302	100	22.1573	60.5898	1.7377	99.1381				16.9511		9.52736		1.92428	7.56646			72.2416		55.2583				42.3871	55.8482	17.9683	14.211	38.865	55.7771	0	0	0	0
Lower quartile	OECD region	OECD Pacific	1.76387e+08	0.0918858	11.822	60.9513	0.0444536	100	0.0418273	71.9617	100	26.5165	67.6617	2.43933	99.2941				17.4183		11.822		2.22495	8.34099			72.6911		60.9513				50.6716	60.9056	18.7032	14.7939	40.4386	57.6241	0	0	0	0
Median	OECD region	OECD Pacific	1.76387e+08	0.0918858	12.2442	61.7062	0.0455825	100	0.0437336	73.7883	100	27.7214	68.9597	2.91768	99.3341				17.5044		12.2442		2.30077	8.49748			72.7821		61.7062				52.9917	61.7058	18.8364	14.9035	40.7427	58.0686	0	0	0	0
Upper quartile	OECD region	OECD Pacific	1.76387e+08	0.0918858	12.6931	62.4498	0.0468112	100	0.0458829	75.8198	100	28.907	70.2019	3.9456	99.3747				17.5879		12.6931		2.3746	8.66164			72.8722		62.4498				55.1897	62.5628	18.9701	15.0076	41.0566	58.5264	0	0	0	0
Max	OECD region	OECD Pacific	1.76387e+08	0.0918858	15.1308	68.1414	0.0527279	100	0.0585223	82.6847	100	33.9896	75.6387	8.18117	99.5114				17.9556		15.1308		2.72067	9.55317			73.2761		68.1414				64.3396	67.4797	19.756	15.5662	42.5804	61.0186	0	0	0	0
Mean	OECD region	Other Africa	1.15249e+09	0.2439	9.57085	42.0486	1.20204	49.9917	0.993193	16.6411	9.29617	97.4503	0.937084	1.61259	0.699197	19.1243	0.102679	62.7909	17.4987	10.0771	9.57085	50.0025	30.3858	8.52347	10.4056	9.36455	72.7828	41.8377	42.0486	9.9979	42.0882	41.6902	53.0018	44.4052	18.8404	14.9013	40.7624	58.0947	35.3335	35.332	0.10711	0.106614	36.4441	36.4296	65.6661	65.7351
Min	OECD region	Other Africa	1.15249e+09	0.2439	8.85582	39.7408	1.16357	47.7104	0.922914	15.32	7.8544	97.1055	0.820611	1.29672	0.610255	16.2976	0.0879692	60.5253	17.3554	9.12322	8.85582	48.7589	28.1289	4.55169	9.13253	8.71394	72.6352	40.0693	39.7408	9.46015	39.6248	39.8918	47.6872	31.2892	18.4605	14.5948	33.5322	48.0379	29.3668	28.4671	0.011147	0.0117493	33.1085	32.9079	25.27	23.1968
Lower quartile	OECD region	Other Africa	1.15249e+09	0.2439	9.43688	41.743	1.19346	49.5959	0.979597	16.3247	9.03602	97.3828	0.92021	1.56432	0.67206	18.5384	0.0994121	62.2771	17.4713	9.87579	9.43688	49.8149	29.9918	7.41019	10.1121	9.22455	72.7527	41.4984	41.743	9.90161	41.6472	41.4131	52.1016	41.8945	18.7826	14.8558	38.5796	54.9832	34.5563	34.5048	0.0637662	0.0642882	35.8839	35.8541	61.6514	61.6842
Median	OECD region	Other Africa	1.15249e+09	0.2439	9.56236	42.0416	1.20172	49.9775	0.99227	16.6182	9.2976	97.4471	0.937246	1.61736	0.69168	19.0874	0.102512	62.7813	17.4996	10.0798	9.56236	50.0024	30.3964	8.55885	10.3744	9.36837	72.7832	41.8275	42.0416	10.0017	42.0763	41.6893	53.0187	44.4273	18.8408	14.9008	40.7893	58.1358	35.391	35.4065	0.09027	0.0904381	36.4464	36.4285	66.4833	66.5388
Upper quartile	OECD region	Other Africa	1.15249e+09	0.2439	9.69632	42.3494	1.21027	50.3821	1.00707	16.9488	9.55845	97.5125	0.955749	1.66621	0.718203	19.684	0.105546	63.2931	17.5261	10.2804	9.69632	50.1972	30.7846	9.65845	10.6624	9.50409	72.813	42.1773	42.3494	10.0955	42.5129	41.9556	53.9025	46.8157	18.8983	14.9481	42.9624	61.1242	36.1548	36.2124	0.128426	0.127548	36.9791	36.973	70.4476	70.4684
Max	OECD region	Other Africa	1.15249e+09	0.2439	10.4561	45.7351	1.25471	52.2405	1.077	18.4615	10.4683	97.8336	1.02827	1.90511	0.874754	22.6617	0.121143	65.3621	17.6437	10.8687	10.4561	51.2489	32.4866	12.4003	12.5968	10.0322	72.9338	43.669	45.7351	10.5737	44.6136	43.122	59.1153	56.7276	19.2344	15.2513	48.3239	69.1568	39.8186	39.2911	1.54153	1.43507	39.4813	39.5954	83.6585	84.1202
Mean	OECD region	Other EU	3.18903e+07	0.471278	10.4569	45.9425	0.426602	85.4319	0.427737	8.88731	99.0141	97.6604	0.347327	1.99226	39.4527	19.0359	0.102544	27.5566	17.4999	9.82084	10.4569	49.9845	30.2762	8.49304	10.0091	9.952	72.7839	44.4129	45.9425	9.99417	44.3922	44.4547	53.0147	57.0322	18.8345	14.8997	40.7275	58.0946	8.57999	8.59735	0.745801	1.22682	71.3875	71.3634	71.3581	71.5596
Min	OECD region	Other EU	3.18903e+07	0.471278	8.57919	44.1165	0.402647	83.8386	0.35499	6.71181	98.6374	80.5101	0	1.42379	27.9841	11.6042	0.0697799	23.7478	17.0198	7.6075	8.57919	46.9496	21.3188	7.31898	7.60634	7.36007	72.2292	42.1784	44.1165	8.6182	41.2043	42.0473	33.2583	50.7984	17.3049	13.7566	38.3643	54.0784	3.21727	3.75288	0.255408	0.513577	65.5358	65.2902	59.9034	60.6549
Lower quartile	OECD region	Other EU	3.18903e+07	0.471278	10.1139	45.5515	0.421445	85.1744	0.411553	8.39883	98.9539	97.8771	0	1.87724	36.7823	17.6049	0.0948768	26.7327	17.4027	9.46126	10.1139	49.5131	28.6716	8.23696	9.47589	9.56616	72.6783	44.0345	45.5515	9.75331	43.8723	44.0571	49.2783	55.958	18.6155	14.7222	40.2952	57.2917	7.71291	7.68048	0.621778	1.03131	70.1741	70.1076	69.7129	69.9075
Median	OECD region	Other EU	3.18903e+07	0.471278	10.4469	45.9554	0.426591	85.4376	0.427557	8.84939	99.016	97.9972	0	1.98811	39.2823	18.9563	0.101969	27.5472	17.5011	9.81335	10.4469	49.974	30.2317	8.48857	9.96963	9.94054	72.7806	44.4063	45.9554	9.98355	44.3841	44.4412	53.0333	56.9757	18.8409	14.9053	40.738	58.103	8.65096	8.66485	0.731658	1.20385	71.4029	71.3872	71.3997	71.6077
Upper quartile	OECD region	Other EU	3.18903e+07	0.471278	10.8003	46.3427	0.431856	85.6983	0.443432	9.32797	99.0772	98.1085	0	2.10149	41.9574	20.3307	0.109769	28.3838	17.5987	10.1697	10.8003	50.468	31.8513	8.75318	10.5193	10.3308	72.8879	44.7816	46.3427	10.2382	44.9141	44.8507	56.8062	58.0036	19.0543	15.0762	41.1584	58.8958	9.51293	9.55812	0.857564	1.4015	72.6437	72.6453	73.1051	73.277
Max	OECD region	Other EU	3.18903e+07	0.471278	12.7164	47.9285	0.452788	86.6229	0.517782	12.0878	99.3539	98.5762	17.4874	2.61541	54.8081	28.7316	0.152262	32.5164	18.004	11.925	12.7164	52.7722	39.5536	9.6955	13.394	12.2335	73.3394	46.6822	47.9285	11.4242	49.1616	46.6043	73.3004	65.3954	20.2164	15.9527	43.3823	62.41	12.4232	13.0321	1.46888	2.31232	77.1504	77.9204	78.9513	79.3082
Mean	OECD region	Other Eurasia	3.1031e+08	0.274969	10.6679	43.4125	0.426271	85.8307	0.568175	9.5679	11.248	92.879	6.40505	0.71595	5.42685	19.1134	0.102546	40.5311	17.5004	10.33	10.6679	49.999	30.3891	8.50328	11.0903	10.5019	72.7832	43.6854	43.4125	9.9984	43.7671	43.0657	52.9695	46.0777	18.8439	14.9004	40.7292	58.0768	7.01435	7.00846	3.61385	3.86609	55.2954	55.317	68.9526	68.9486
Min	OECD region	Other Eurasia	3.1031e+08	0.274969	10.0418	42.1045	0.409829	84.4301	0.529544	8.52243	10.5119	88.7583	4.26331	0.368883	4.08778	15.8178	0.0863299	37.6175	17.3162	9.61603	10.0418	48.287	26.4894	7.45124	10.1578	9.38027	72.6096	41.7472	42.1045	9.0865	41.4981	40.3347	44.7762	43.0616	18.0039	14.1989	38.8479	54.2688	4.88196	4.85807	2.5945	2.85417	46.9135	46.0393	64.533	64.5134
Lower quartile	OECD region	Other Eurasia	3.1031e+08	0.274969	10.5597	43.184	0.423185	85.6397	0.560623	9.31253	11.1082	92.1847	5.66374	0.592932	5.12884	18.2952	0.0981419	39.8743	17.4717	10.2092	10.5597	49.7572	29.8284	8.28534	10.9276	10.3315	72.7543	43.458	43.184	9.88266	43.4369	42.686	51.6437	45.5053	18.7635	14.84	40.3332	57.4958	6.68612	6.66297	3.39032	3.6322	54.2976	54.3439	68.2546	68.2453
Median	OECD region	Other Eurasia	3.1031e+08	0.274969	10.6669	43.4171	0.42602	85.8429	0.567727	9.54056	11.2459	93.0732	6.23517	0.691089	5.41666	18.9994	0.101883	40.4883	17.5004	10.3264	10.6669	49.9915	30.385	8.50241	11.0956	10.4932	72.7823	43.693	43.4171	9.99921	43.752	43.0845	52.9665	46.07	18.842	14.9003	40.7365	58.0947	7.03181	7.03378	3.59971	3.84649	55.3849	55.4126	68.9585	68.9667
Upper quartile	OECD region	Other Eurasia	3.1031e+08	0.274969	10.7705	43.6236	0.429372	86.0344	0.575528	9.7985	11.389	93.7282	7.0172	0.812667	5.7085	19.8467	0.106275	41.1437	17.5291	10.4436	10.7705	50.2366	30.9663	8.7193	11.2564	10.6605	72.8133	43.9293	43.6236	10.1215	44.0719	43.4637	54.2706	46.6347	18.9249	14.9622	41.132	58.6674	7.35262	7.36347	3.82466	4.08752	56.3916	56.3574	69.7115	69.6993
Max	OECD region	Other Eurasia	3.1031e+08	0.274969	11.3915	44.6158	0.444933	86.8057	0.609396	11.1448	12.0497	95.3678	10.0665	1.45931	7.18937	23.76	0.131039	45.0167	17.6441	11.244	11.3915	51.6551	34.4987	9.52372	12.0105	11.9072	72.9447	45.2418	44.6158	10.9078	46.7405	45.8001	61.0972	50.157	19.5668	15.3992	42.485	61.2522	8.67852	9.37139	4.88209	5.30325	60.7861	61.5576	73.4628	73.5003
Mean	OECD region	Other non-OECD Asia	1.22067e+09	0.214231	11.3212	41.9383	0.688262	73.209	0.779364	15.5453	27.8359	87.6712	8.26401	4.06474	8.34639	19.0857	0.102623	55.6374	17.5007	10.87	11.3212	50.001	30.3665	8.5045	11.4955	10.7525	72.7835	41.9716	41.9383	10.0011	41.6342	41.7149	52.9703	59.8669	18.8412	14.9024	40.7439	58.0386	18.7016	18.7011	0.232312	0.461271	43.0406	43.0249	52.8636	52.2696
Min	OECD region	Other non-OECD Asia	1.22067e+09	0.214231	10.8158	40.4991	0.663733	71.4849	0.735164	13.8931	25.8336	77.8752	4.54139	3.34108	3.29682	17.2527	0.091137	52.4694	17.3282	10.1751	10.8158	49.229	27.9493	6.51615	10.7895	9.9119	72.6358	40.0252	40.4991	9.69197	39.403	39.7139	47.2748	48.3754	18.4297	14.581	37.1183	52.7619	15.6741	15.1213	0.0871626	0.183588	36.8851	37.9704	39.8091	40.6351
Lower quartile	OECD region	Other non-OECD Asia	1.22067e+09	0.214231	11.2221	41.6705	0.683739	72.8787	0.770432	15.146	27.4274	86.2952	6.40454	3.86964	7.12028	18.7071	0.100687	54.997	17.4743	10.7358	11.2221	49.8742	29.9853	8.14514	11.3667	10.6229	72.7549	41.6496	41.6705	9.93868	41.2593	41.3797	52.0083	57.8938	18.7821	14.8552	40.0079	57.0745	18.1555	18.1708	0.182542	0.364829	42.0945	42.0576	50.6459	50.0882
Median	OECD region	Other non-OECD Asia	1.22067e+09	0.214231	11.3223	41.9383	0.688179	73.212	0.779013	15.5051	27.8309	88.0219	7.92062	4.03727	8.27659	19.0671	0.102526	55.6377	17.5004	10.8722	11.3223	49.999	30.3745	8.50326	11.4954	10.7485	72.7832	41.9694	41.9383	10.0004	41.6393	41.7141	52.9833	59.8305	18.8412	14.9019	40.7294	58.0325	18.708	18.7167	0.220709	0.44148	43.0464	43.0343	52.8264	52.2384
Upper quartile	OECD region	Other non-OECD Asia	1.22067e+09	0.214231	11.4211	42.2045	0.692672	73.5457	0.788284	15.9213	28.2273	89.4624	9.66161	4.22747	9.48296	19.4536	0.104502	56.2897	17.5274	11.0031	11.4211	50.1272	30.7565	8.85591	11.6187	10.8825	72.8117	42.3029	42.2045	10.0642	42.0068	42.0424	53.9309	61.7931	18.9002	14.9498	41.4671	59.0006	19.2272	19.2397	0.269311	0.536367	43.9744	43.9936	55.1306	54.5036
Max	OECD region	Other non-OECD Asia	1.22067e+09	0.214231	11.9078	43.3704	0.712648	74.894	0.834068	17.9936	29.7622	91.5472	18.5272	5.55136	15.6848	21.6001	0.112967	60.0216	17.6324	11.6445	11.9078	50.6604	32.3113	10.3725	12.3098	11.5618	72.93	43.8417	43.3704	10.3876	43.5379	43.6722	57.4376	71.315	19.3486	15.1832	44.6287	63.2559	21.5079	21.929	0.653619	1.28076	48.2833	48.1405	64.0191	64.1375
Mean	OECD region	Other OECD America	2.01238e+08	0.191022	11.5825	44.7712	0.27348	89.5799	0.328244	11.9012	99.2585	93.639	0	6.36103	32.5414	19.0737	0.102437	30.3492	17.5007	10.8673	11.5825	50.0104	30.315	8.49549	11.6447	11.3192	72.7826	44.5027	44.7712	10.0068	44.4277	44.8422	53.0111	49.7645	18.8411	14.8989	40.7401	58.0969	3.41003	3.4143	0.815313	0.996481	69.1847	69.197	69.5392	70.03
Min	OECD region	Other OECD America	2.01238e+08	0.191022	10.9296	43.8464	0.260208	88.7333	0.301334	10.3398	99.1856	92.5539	0	5.32268	26.0066	11.2183	0.0589404	28.7482	17.3256	10.2455	10.9296	44.0591	25.7677	6.95562	10.2785	10.6193	72.6082	43.7745	43.8464	7.38186	35.4173	43.8918	42.4148	44.3408	17.801	14.1787	37.9681	53.118	2.20878	2.0885	0.540099	0.693251	66.831	66.091	65.551	65.8192
Lower quartile	OECD region	Other OECD America	2.01238e+08	0.191022	11.4592	44.6248	0.271128	89.4325	0.322491	11.5464	99.2488	93.4338	0	6.15632	31.1185	15.2283	0.0820388	30.007	17.4703	10.7458	11.4592	49.2437	29.4763	8.16778	11.365	11.1787	72.7508	44.3789	44.6248	9.61832	43.5984	44.6781	51.0908	48.7363	18.7282	14.8089	40.1337	57.1019	3.20945	3.21795	0.750722	0.923761	68.8043	68.8081	68.9095	69.4171
Median	OECD region	Other OECD America	2.01238e+08	0.191022	11.5807	44.7742	0.273474	89.5847	0.32784	11.8655	99.2589	93.6386	0	6.3614	32.5232	18.1085	0.09703	30.3313	17.5008	10.8635	11.5807	50.0094	30.3217	8.49368	11.6671	11.3165	72.7828	44.4982	44.7742	10.0017	44.4402	44.843	53.004	49.7365	18.8428	14.8981	40.7224	58.1239	3.42718	3.43386	0.812642	0.990667	69.1901	69.204	69.5463	70.0368
Upper quartile	OECD region	Other OECD America	2.01238e+08	0.191022	11.7024	44.9198	0.27579	89.7305	0.333593	12.2313	99.2686	93.8437	0	6.56619	33.9264	22.122	0.118032	30.6863	17.5313	10.9887	11.7024	50.7594	31.0979	8.83238	11.9461	11.457	72.8144	44.6233	44.9198	10.3878	45.2906	44.9994	54.8855	50.7892	18.9526	14.986	41.3317	59.087	3.62604	3.63599	0.874878	1.06114	69.5832	69.5855	70.1956	70.6722
Max	OECD region	Other OECD America	2.01238e+08	0.191022	12.3878	45.8648	0.286988	90.447	0.365231	14.1084	99.3104	94.6773	0	7.44605	40.3812	37.9572	0.225651	32.2994	17.6612	11.6501	12.3878	55.8676	36.1586	10.1594	12.6536	12.1166	72.9967	45.1657	45.8648	12.8453	51.3767	45.8835	64.5825	57.2131	19.563	15.5968	43.909	62.9973	4.5435	4.56468	1.24926	1.44494	71.7061	71.2998	72.6835	73.1059
Mean	OECD region	USA	3.35909e+08	0.136417	11.0435	61.7017	0.0778585	100	0.0669557	30.3721	100	95.1424	1.21501	3.64257	99.7833				17.499		11.0435		2.30042	8.49924			72.7833		61.7017				52.9912	61.6865	18.8405	14.9	40.7396	58.0796	0	0	0	0
Min	OECD region	USA	3.35909e+08	0.136417	10.3148	60.4363	0.0736288	100	0.0616565	27.459	100	88.4103	0.0157863	1.00851	99.7442				17.3323		10.3148		2.04877	8.07825			72.6152		60.4363				45.1837	58.6591	18.2774	14.4096	39.8829	56.7878	0	0	0	0
Lower quartile	OECD region	USA	3.35909e+08	0.136417	10.9382	61.4405	0.0769393	100	0.065879	29.7514	100	94.3073	0.430989	2.86373	99.7767				17.466		10.9382		2.25125	8.42718			72.7472		61.4405				51.542	61.2836	18.7506	14.8253	40.5939	57.873	0	0	0	0
Median	OECD region	USA	3.35909e+08	0.136417	11.0419	61.7022	0.0778538	100	0.0669515	30.3843	100	95.2339	1.04578	3.53476	99.7836				17.4991		11.0419		2.30063	8.50141			72.7828		61.7022				53.0195	61.6798	18.8397	14.9003	40.7387	58.0807	0	0	0	0
Upper quartile	OECD region	USA	3.35909e+08	0.136417	11.1472	61.9553	0.0787585	100	0.068018	30.973	100	96.1201	1.768	4.28535	99.7899				17.5324		11.1472		2.3497	8.57197			72.8187		61.9553				54.4488	62.0802	18.9314	14.9742	40.8837	58.2886	0	0	0	0
Max	OECD region	USA	3.35909e+08	0.136417	11.6397	63.5934	0.082277	100	0.0725725	34.326	100	98.5348	5.98651	9.49336	99.8166				17.6694		11.6397		2.57491	8.85679			72.983		63.5934				59.9871	64.2448	19.4886	15.3091	41.6118	59.3953	0	0	0	0

## Sheet: 02a_Coefficients_legend
Coeff_ID	Coeff_short_name	Coeff_long_name
C0	Plastic_MSW	Plastic in MSW as % of MSW generation
C0a	Rigid_plastic	Rigid plastic in MSW as % of plastic generation
C1	Uncol_litter_pct	Uncollected litter as % of generated MSW
C2	MSW_col_pct	Collected MSW as % of generated MSW exc. uncollected litter
C3	Col_sys_deb_em_pct	Debris emissions from collection system as % of collected MSW
C4	MSW_recv_pct	Collected MSW for recovery as % of collected & delivered MSW
C5	Cont_disp_pct	Controlled disposal of MSW as % of collected MSW for disposal
C6i	MSW_recy_pct	Collected MSW for dry recycling as % of collected MSW for recovery
C6ii	Comp_pct	Composting and AD as % of collected MSW for recovery
C6iii	Incin_pct	Incineration as % of collected MSW for recovery
C7	Form_dry_recy_pct	Collected MSW for dry recycling by formal sector as % of collected MSW for dry recycling
C8	Disp_open_burn_pct	Open burning of uncontrolled disposal of MSW as % of uncontrolled disposal of MSW
C9	Disp_debris_em_pct	Debris emissions from uncontrolled disposal as a % of uncontrolled disposal of MSW unburnt
C10	Uncol_burnt_pct	Uncollected MSW open burnt as % of uncollected MSW
C11	Uncol_litter_plas_pct	Plastic in litter as % of uncollected litter
C12	Uncol_burnt_plas_pct	Uncollected plastic burnt as % of uncollected MSW burnt
C13	Col_sys_deb_em_plas_pct	Plastic in collection system debris emissions as % of collection system MSW debris emissions
C14	Disp_debris_em_plas_pct	Disposal system plastic debris emissions as % of disposal system MSW debris emissions of MSW
C15	Inf_plas_col_pct	Plastic collected by informal sector as % of informal sector collection of MSW for dry recycling
C16	Form_plas_col_pct	Plastic collected by formal sector as % of formal sector collection of MSW for dry recycling
C17	Uncon_disp_burnt_plas_pct	Plastic in uncontrolled disposal of MSW burnt as % of uncontrolled diposal of MSW burnt
C18	Uncol_unburnt_plas_pct	Plastic in uncollected MSW unburnt as % of uncollected MSW unburnt
C11a	Uncol_litter_plas_rig_pct	Rigid plastic in uncollected litter as % of uncollected plastic litter
C12a	Uncol_burnt_plas_rig_pct	Uncollected rigid plastic burnt as % uncollected plastics burnt
C13a	Col_sys_deb_em_plas_rig_pct	Rigid plastic collection system debris emissions as % of collection system plastic debris emissions
C14a	Disp_debris_em_plas_rig_pct	Disposal system rigid plastic debris emissions as % disposal system plastic debris emissions
C17a	Uncon_disp_burnt_plas_rig_pct	Rigid plastic in uncontrolled disposal of MSW burnt as % of uncontrolled diposal of plastic burnt
C18a	Uncol_unburnt_plas_rig_pct	Uncollected rigid plastic unburnt as % uncollected plastics unburnt
C21a	Inf_plas_rig_col_pct	Rigid plastic in informal collection for recycling as % of informal sector collection of plastic for dry recycling
C22a	Form_plas_rig_col_pct	Rigid plastic in formal collection for recycling as % of formal sector collection of plastic for dry recycling
C23aa	Inf_rig_sort_loss_pct	Informal sector sorting losses of rigid plastic as % of informal collection of rigid plastic for dry recycling
C23ab	Inf_flex_sort_loss_pct	Informal sector sorting losses of flexible plastic as % of informal collection of flexible plastic for dry recycling
C24aa	Form_rig_sort_loss_pct	Formal sector sorting losses of rigid plastic as % of formal collection of rigid plastic for dry recycling
C24ab	Form_flex_sort_loss_pct	Formal sector sorting losses of flexible plastic as % of formal collection of flexible plastic for dry recycling
C25aa	Inf_rig_mis_sort_loss_pct	Informal mismanaged sorting losses of rigid plastic as % of sorting losses of rigid plastic from informal collection for dry recycling
C25ab	Inf_flex_mis_sort_loss_pct	Informal mismanaged sorting losses of flexible plastic as % of sorting losses of flexible plastic from informal collection for dry recycling
C26aa	Form_rig_mis_sort_loss_pct	Formal mismanaged sorting losses of rigid plastic as % of sorting losses of rigid plastic from formal collection for dry recycling
C26ab	Form_flex_mis_sort_loss_pct	Formal mismanaged sorting losses of flexible plastic as % of sorting losses of flexible plastic from formal collection for dry recycling
C27aa	Inf_rig_mis_sort_loss_burnt_pct	Informal mismanaged sorting losses of rigid plastic openly burnt as % of mismanaged sorting losses of rigid plastic from informal collection for dry recycling
C27ab	Inf_flex_mis_sort_loss_burnt_pct	Informal mismanaged sorting losses of flexible plastic openly burnt as % of mismanaged sorting losses of flexible plastic from informal collection for dry recycling
C28aa	Form_rig_mis_sort_loss_burnt_pct	Formal mismanaged sorting losses of rigid plastic openly burnt as % of mismanaged sorting losses of rigid plastic from formal collection for dry recycling
C28ab	Form_flex_mis_sort_loss_burnt_pct	Formal mismanaged sorting losses of flexible plastic openly burnt as % of mismanaged sorting losses of flexible plastic from formal collection for dry recycling

## Sheet: 03_Outputs
				Units:	t·y-1	kg·cap-1·d-1	t·y-1	kg·cap-1·d-1	% MSW gen. exc. Uncol. litter	% MSW generation	% MSW generation	% MSW generation	% MSW generation	% MSW generation	% MSW generation	% MSW generation	% MSW generation	% MSW generation	% collected for recycling	% collected for recycling	% MSW disposed	% MSW disposed	% MSW generation	t·y-1	% of MSW generation	t·y-1	t·y-1	t·y-1	% plastic emissions	% plastic emissions	kg·cap-1·Y-1	kg·cap-1·Y-1	kg·cap-1·Y-1	t·y-1	t·y-1	t·y-1	t·y-1	% plastic emissions	% plastic emissions	% plastic emissions	% plastic emissions	t·y-1	t·y-1	t·y-1	t·y-1	t·y-1	% plastic emissions	% plastic emissions	% plastic emissions
Statistic	Aggregation_lv1	Aggregation_lv2	Population_2020	Rural_share	wg	wg_per_cap	pwg	pwg_per_cap	col_cov_pct_gen_exc_lit	col_del_pct_gen	litter_em_pct_gen	uncol_em_pct_gen	collection_em_pct_gen	cont_disp_pct_gen	uncont_disp_pct_gen	compost_pct_gen	incin_pct_gen	recy_pct_gen	recy_form_pct_recy	recy_inform_pct_recy	cont_disp_pct_disp	uncont_disp_pct_disp	man_cont_pct_gen	open_burn_MSW	open_burn_MSW_pct_gen	plas_debris_em	plas_burn_em	plas_em	plas_debris_em_pct_em	plas_burn_em_pct_em	plas_debris_em_per_cap	plas_burn_em_per_cap	plas_em_per_cap	rigid_plas_deb_em	flex_plas_deb_em	rigid_plas_ob_em	flex_plas_ob_em	rigid_plas_deb_em_pct_em	flex_plas_deb_em_pct_em	rigid_plas_ob_em_pct_em	flex_plas_ob_em_pct_em	plas_litter_em	plas_uncol_em	plas_collection_em	plas_disp_em	plas_recy_em	plas_litter_em_pct_em	plas_uncol_em_pct_em	plas_collection_em_pct_em
Mean	World	World	7.83433e+09	0.202025	2.33256e+09	0.815716	2.54774e+08	0.0890964	84.9507	84.215	0.438815	14.9832	0.362956	34.773	25.8912	1.18202	8.77713	13.5916	48.1272	51.8728	57.3203	42.6797	58.2801	2.77985e+08	11.9177	2.24899e+07	3.00056e+07	5.24955e+07	42.8421	57.1579	2.87069	3.83002	6.70071	1.00455e+07	1.24444e+07	1.28511e+07	1.71546e+07	19.1362	23.7059	24.48	32.6779	1.79122e+06	3.6079e+07	924712	1.26824e+07	1.01821e+06	3.41241	68.7282	1.76163
Min	World	World	7.83433e+09	0.202025	2.29864e+09	0.803853	2.48268e+08	0.0868211	84.5357	83.7973	0.430904	14.5689	0.351409	34.0552	25.2472	1.01309	8.25414	13.1526	46.1363	49.6686	56.5318	41.5878	57.6743	2.68002e+08	11.4435	2.14328e+07	2.85072e+07	5.06948e+07	40.9228	55.4871	2.73575	3.63876	6.47085	9.6098e+06	1.18176e+07	1.21969e+07	1.63097e+07	18.497	22.4258	23.7641	31.6002	1.75957e+06	3.47275e+07	893787	1.16059e+07	961383	3.29004	67.3107	1.69014
Lower quartile	World	World	7.83433e+09	0.202025	2.32637e+09	0.81355	2.53502e+08	0.0886515	84.869	84.1336	0.437319	14.9012	0.360977	34.6386	25.788	1.14222	8.66334	13.4947	47.7361	51.4887	57.1648	42.5282	58.1609	2.76054e+08	11.8344	2.22777e+07	2.97294e+07	5.21414e+07	42.5163	56.8388	2.8436	3.79476	6.65551	9.95181e+06	1.23141e+07	1.27304e+07	1.69913e+07	18.9943	23.498	24.3321	32.4634	1.7852e+06	3.58081e+07	918264	1.24866e+07	1.00672e+06	3.39163	68.444	1.74663
Median	World	World	7.83433e+09	0.202025	2.33259e+09	0.815725	2.54748e+08	0.0890873	84.9486	84.2126	0.438802	14.9853	0.362863	34.771	25.8913	1.17912	8.7768	13.5885	48.1187	51.8813	57.3198	42.6802	58.2803	2.77965e+08	11.9159	2.24876e+07	2.99964e+07	5.24953e+07	42.8428	57.1572	2.87039	3.82884	6.70068	1.00445e+07	1.24419e+07	1.28454e+07	1.71488e+07	19.1381	23.7057	24.4769	32.6738	1.79114e+06	3.60716e+07	924438	1.26694e+07	1.01787e+06	3.41269	68.7404	1.76133
Upper quartile	World	World	7.83433e+09	0.202025	2.33877e+09	0.817886	2.5602e+08	0.0895323	85.0332	84.2981	0.440284	15.0646	0.364896	34.9049	25.9955	1.21819	8.88672	13.6872	48.5113	52.2639	57.4718	42.8352	58.3985	2.79889e+08	11.9997	2.26972e+07	3.02763e+07	5.28351e+07	43.1612	57.4837	2.89715	3.86457	6.74404	1.01324e+07	1.25717e+07	1.29681e+07	1.73221e+07	19.2742	23.9074	24.6239	32.8915	1.79702e+06	3.63478e+07	931087	1.28677e+07	1.02899e+06	3.43342	69.013	1.77681
Max	World	World	7.83433e+09	0.202025	2.36713e+09	0.827802	2.62724e+08	0.0918765	85.3678	84.6298	0.447169	15.3953	0.37341	35.4726	26.4945	1.46825	9.36787	14.1548	50.3314	53.8637	58.4122	43.4682	58.9098	2.88642e+08	12.3576	2.37724e+07	3.15098e+07	5.45122e+07	44.5129	59.0772	3.03439	4.02202	6.95812	1.06566e+07	1.32786e+07	1.36402e+07	1.81583e+07	19.8792	24.8035	25.5738	33.7076	1.82627e+06	3.76532e+07	971253	1.38925e+07	1.07699e+06	3.5199	70.1176	1.84371
Mean	Income category	HIC	1.21752e+09	0.234527	6.53307e+08	1.4701	7.71647e+07	0.17364	99.9565	99.822	0.0695051	0.0434695	0.0650038	61.6555	0.534294	1.95299	12.7634	22.9159	99.6344	0.365647	99.1411	0.858905	99.2877	772105	0.118142	153070	107857	260927	61.9704	38.0296	0.125722	0.0885872	0.21431	102260	50809.5	66236.2	41620.8	41.4058	20.5647	23.3233	14.7062	79462.5	34496.3	50159.5	96693.9	114.536	32.1888	13.9342	20.3158
Min	Income category	HIC	1.21752e+09	0.234527	6.34044e+08	1.42676	7.33537e+07	0.165064	99.9294	99.796	0.0669345	0.025917	0.0618077	59.5164	0.234589	1.48046	11.5094	21.5988	99.5943	0.333716	98.3712	0.381479	98.8097	123009	0.018945	140263	16053.1	162681	16.1347	9.74903	0.115204	0.0131851	0.133617	94595.1	45494.2	9598.49	5684.38	10.788	5.34672	5.57603	3.45211	76255	18843	46847.7	6569.52	65.9385	8.54529	3.44669	5.41389
Lower quartile	Income category	HIC	1.21752e+09	0.234527	6.49458e+08	1.46144	7.64659e+07	0.172067	99.9526	99.818	0.0690526	0.0391084	0.0643569	61.2812	0.397449	1.83261	12.4986	22.6546	99.6283	0.359425	98.9361	0.639895	99.1606	468424	0.0714842	150115	60124.1	213439	53.4231	28.1726	0.123295	0.0493824	0.175306	100435	49514.5	36803.4	22804	35.6785	17.7103	17.1143	10.5398	78855.5	30673.9	49503.1	48802.6	101.45	27.715	11.5009	17.5144
Median	Income category	HIC	1.21752e+09	0.234527	6.53225e+08	1.46992	7.71478e+07	0.173602	99.9571	99.8226	0.0695087	0.0429152	0.0650041	61.6643	0.493793	1.9351	12.7437	22.9163	99.6345	0.365515	99.2053	0.794687	99.3288	673216	0.103074	152721	89390.8	242610	63.1484	36.8516	0.125436	0.0734203	0.199265	102033	50662.9	54166.8	33742.3	42.2089	20.9684	22.3725	13.8675	79469.2	33940.7	50142.5	77945.7	112.604	32.7522	13.9495	20.6498
Upper quartile	Income category	HIC	1.21752e+09	0.234527	6.57182e+08	1.47882	7.7851e+07	0.175184	99.9609	99.8265	0.0699404	0.0473908	0.0656219	62.0344	0.662297	2.05422	13.0048	23.1765	99.6406	0.371737	99.3601	1.06392	99.4243	961293	0.147024	155694	133772	286561	71.8274	46.5769	0.127878	0.109872	0.235364	103866	51917.9	81412.3	51601.6	47.959	23.8476	28.5073	18.0347	80027.4	37776.7	50793.1	122529	125.272	37.1861	16.345	23.4558
Max	Income category	HIC	1.21752e+09	0.234527	6.73456e+08	1.51544	8.10398e+07	0.18236	99.9741	99.8413	0.0720562	0.0705274	0.0683556	63.5364	1.00103	2.74445	14.1278	24.4368	99.6663	0.405721	99.6185	1.62882	99.5886	4.09595e+06	0.629439	173364	772701	921359	90.251	83.8653	0.142391	0.63465	0.756749	115343	60797.9	496138	276563	60.6235	30.4561	61.6434	46.4726	82520.2	62049.9	53824.8	760874	252.258	48.2626	27.263	30.4462
Mean	Income category	LIC	7.31313e+08	0.242077	1.29759e+08	0.486117	1.17665e+07	0.044081	44.1818	42.6898	1.71411	54.8613	0.734818	0.813353	35.4604	0.049934	0.140346	6.2258	0.395513	99.6045	2.24295	97.7571	7.055	2.94698e+07	22.711	4.83363e+06	2.59339e+06	7.42701e+06	65.0824	34.9176	6.60952	3.54621	10.1557	2.17075e+06	2.66287e+06	1.10244e+06	1.49094e+06	29.2288	35.8536	14.8435	20.0741	389209	5.93081e+06	86466.9	794187	226333	5.24217	79.8494	1.16462
Min	Income category	LIC	7.31313e+08	0.242077	1.25252e+08	0.469232	1.08634e+07	0.0406977	41.9916	40.5319	1.64532	52.3116	0.66815	0.653858	33.113	0.0464756	0.136244	5.75444	0.00044173	98.2115	1.78603	97.0842	6.4977	2.72822e+07	21.2405	4.47947e+06	2.34994e+06	6.89e+06	62.1219	32.521	6.12524	3.21332	9.42142	1.99022e+06	2.45646e+06	981578	1.3376e+06	27.7511	33.9692	13.5581	18.6706	371479	5.46417e+06	76713.7	675949	204880	4.86849	77.0932	1.02573
Lower quartile	Income category	LIC	7.31313e+08	0.242077	1.28968e+08	0.483156	1.15768e+07	0.0433702	43.6743	42.191	1.70028	54.3979	0.720333	0.773247	34.9641	0.0493125	0.139482	6.12046	0.164799	99.4338	2.13084	97.6539	6.94513	2.90188e+07	22.4017	4.74941e+06	2.53845e+06	7.30789e+06	64.6193	34.4375	6.49436	3.47109	9.99283	2.13149e+06	2.61384e+06	1.07694e+06	1.45749e+06	28.9586	35.5397	14.5992	19.7736	385289	5.81828e+06	84159.2	766136	221476	5.17639	79.4852	1.13144
Median	Income category	LIC	7.31313e+08	0.242077	1.29743e+08	0.486058	1.17557e+07	0.0440406	44.1506	42.6556	1.71351	54.8943	0.7338	0.808681	35.4173	0.0499037	0.140352	6.22524	0.344143	99.6559	2.23033	97.7697	7.05425	2.94575e+07	22.7114	4.82792e+06	2.5911e+06	7.4225e+06	65.1057	34.8943	6.60171	3.54308	10.1496	2.16829e+06	2.66046e+06	1.10112e+06	1.48844e+06	29.2237	35.8432	14.8359	20.0603	389042	5.92624e+06	86259.1	790855	225811	5.24189	79.8788	1.16228
Upper quartile	Income category	LIC	7.31313e+08	0.242077	1.30552e+08	0.489089	1.19445e+07	0.0447478	44.6594	43.1557	1.7274	55.3537	0.74843	0.850225	35.9224	0.0505251	0.141195	6.32649	0.566168	99.8352	2.3461	97.8692	7.15976	2.99083e+07	23.021	4.9115e+06	2.64489e+06	7.5386e+06	65.5625	35.3807	6.71601	3.61663	10.3083	2.2059e+06	2.70686e+06	1.12554e+06	1.5217e+06	29.4997	36.1713	15.0714	20.3572	393027	6.03439e+06	88476	818810	230756	5.31047	80.2333	1.195
Max	Income category	LIC	7.31313e+08	0.242077	1.33655e+08	0.500713	1.34414e+07	0.0503558	46.8096	45.2959	1.77849	56.9819	0.82553	1.07683	37.9208	0.053335	0.145385	6.77468	1.78852	99.9996	2.91581	98.214	7.64542	3.24793e+07	24.6163	5.34725e+06	2.96406e+06	8.13862e+06	67.479	37.8781	7.31185	4.05307	11.1288	2.39067e+06	3.02102e+06	1.28803e+06	1.69986e+06	30.9494	37.9193	16.4856	21.9308	411350	6.54362e+06	107200	1.00069e+06	256722	5.57154	81.7975	1.42782
Mean	Income category	LMC	3.17659e+09	0.196434	7.34217e+08	0.633242	7.76931e+07	0.0670082	73.589	72.5193	0.681603	26.231	0.568142	6.08757	54.6403	1.22041	0.0362573	10.5347	0.0482955	99.9517	10.0245	89.9755	17.7914	1.60578e+08	21.8707	1.34018e+07	1.72639e+07	3.06657e+07	43.7036	56.2964	4.21892	5.43473	9.65365	5.83972e+06	7.56208e+06	7.20971e+06	1.00542e+07	19.0436	24.66	23.5104	32.786	875777	2.04148e+07	441407	8.29126e+06	642438	2.85631	66.5723	1.43959
Min	Income category	LMC	3.17659e+09	0.196434	7.21525e+08	0.622296	7.42296e+07	0.064021	72.6452	71.5755	0.668173	25.169	0.5455	5.73988	53.6215	0.978112	0.0356122	9.97521	0.0262235	99.9228	9.46253	89.5327	17.1892	1.51977e+08	20.8282	1.25093e+07	1.62281e+07	2.9283e+07	41.4734	53.7457	3.93795	5.10864	9.21838	5.46604e+06	6.99385e+06	6.76016e+06	9.34348e+06	18.0128	23.1823	22.3066	31.1219	851935	1.93438e+07	417996	7.49517e+06	590766	2.73659	64.6725	1.35504
Lower quartile	Income category	LMC	3.17659e+09	0.196434	7.31875e+08	0.631222	7.71169e+07	0.0665112	73.4057	72.3358	0.67904	26.0518	0.563948	6.0335	54.432	1.16878	0.0361393	10.4152	0.0431179	99.947	9.93484	89.8869	17.6579	1.58984e+08	21.6735	1.32056e+07	1.702e+07	3.03752e+07	43.1987	55.7885	4.15715	5.35794	9.56221	5.75739e+06	7.44061e+06	7.11191e+06	9.90603e+06	18.8263	24.3324	23.2846	32.4425	871342	2.01885e+07	436752	8.13849e+06	632165	2.83151	66.2121	1.42256
Median	Income category	LMC	3.17659e+09	0.196434	7.3417e+08	0.633202	7.76737e+07	0.0669915	73.5885	72.5178	0.681552	26.2312	0.568011	6.08768	54.6444	1.21673	0.0362588	10.5301	0.0478882	99.9521	10.0233	89.9767	17.7863	1.60558e+08	21.8656	1.33979e+07	1.72557e+07	3.06541e+07	43.7092	56.2908	4.21769	5.43215	9.65001	5.83629e+06	7.56099e+06	7.20662e+06	1.00476e+07	19.0425	24.6587	23.5063	32.7794	875704	2.04127e+07	441404	8.28137e+06	642249	2.85721	66.5741	1.43901
Upper quartile	Income category	LMC	3.17659e+09	0.196434	7.36598e+08	0.635296	7.82802e+07	0.0675146	73.7702	72.6985	0.684082	26.4131	0.57225	6.14048	54.8461	1.26953	0.0363725	10.6523	0.0529906	99.9569	10.1131	90.0652	17.9182	1.62131e+08	22.0711	1.35903e+07	1.74973e+07	3.0945e+07	44.2115	56.8013	4.27825	5.5082	9.74157	5.92031e+06	7.67845e+06	7.30307e+06	1.0199e+07	19.2544	24.98	23.725	33.1278	880072	2.06375e+07	445935	8.43586e+06	652092	2.88144	66.9485	1.45655
Max	Income category	LMC	3.17659e+09	0.196434	7.475e+08	0.644698	8.06611e+07	0.0695681	74.6606	73.5825	0.694403	27.1656	0.592391	6.34872	55.673	1.53512	0.0368942	11.3661	0.0772423	99.9738	10.4673	90.5375	18.5663	1.69467e+08	22.9571	1.45783e+07	1.85778e+07	3.23566e+07	46.2543	58.5266	4.58929	5.84834	10.186	6.41494e+06	8.18741e+06	7.79102e+06	1.09619e+07	20.1492	26.3356	24.8392	34.5291	900676	2.15526e+07	469829	9.1327e+06	691615	2.97449	68.5098	1.54072
Mean	Income category	UMC	2.7089e+09	0.181168	8.15282e+08	0.824558	9.69072e+07	0.0980099	89.4884	88.8505	0.313134	10.4787	0.357749	44.4702	18.7969	0.709737	14.8286	10.045	4.09287	95.9071	70.2901	29.7099	70.0353	8.7165e+07	10.6918	4.10141e+06	1.00405e+07	1.41419e+07	29.0046	70.9954	1.51405	3.70647	5.22052	1.93275e+06	2.16866e+06	4.47267e+06	5.5678e+06	13.6683	15.3363	31.6259	39.3695	446775	9.69879e+06	346679	3.50031e+06	149323	3.16008	68.5872	2.45205
Min	Income category	UMC	2.7089e+09	0.181168	7.95114e+08	0.804161	9.3051e+07	0.0941098	88.9177	88.2772	0.305495	9.91364	0.344376	43.6947	17.9447	0.557307	13.7679	9.36015	3.45285	94.7424	69.3389	28.6163	69.2362	8.2788e+07	10.0329	3.86204e+06	9.31205e+06	1.32033e+07	27.2915	69.4691	1.42569	3.43757	4.87405	1.82362e+06	2.03843e+06	4.15007e+06	5.16198e+06	12.9371	14.3544	30.8934	38.3955	436031	9.1448e+06	330536	3.06784e+06	140544	2.95637	64.6921	2.24635
Lower quartile	Income category	UMC	2.7089e+09	0.181168	8.1105e+08	0.820279	9.61431e+07	0.0972371	89.3863	88.7478	0.311757	10.379	0.354878	44.3157	18.6475	0.667084	14.5978	9.90131	3.90293	95.7557	70.1021	29.5269	69.8604	8.61703e+07	10.5659	4.04903e+06	9.89832e+06	1.39759e+07	28.7063	70.6945	1.49471	3.654	5.15924	1.90919e+06	2.13927e+06	4.40806e+06	5.48861e+06	13.5312	15.1688	31.4678	39.1899	444813	9.58361e+06	342948	3.38383e+06	147366	3.12426	68.0014	2.41667
Median	Income category	UMC	2.7089e+09	0.181168	8.15309e+08	0.824587	9.68925e+07	0.097995	89.4885	88.8514	0.313148	10.4788	0.357758	44.4687	18.7977	0.702637	14.8292	10.0335	4.05675	95.9433	70.2864	29.7136	70.0341	8.71416e+07	10.6848	4.09961e+06	1.00349e+07	1.41395e+07	29.0084	70.9916	1.51339	3.70442	5.21963	1.93169e+06	2.16742e+06	4.46985e+06	5.56399e+06	13.6714	15.3364	31.6227	39.3646	446710	9.69603e+06	346456	3.49016e+06	149151	3.16104	68.6101	2.45038
Upper quartile	Income category	UMC	2.7089e+09	0.181168	8.19481e+08	0.828806	9.76433e+07	0.0987543	89.5885	88.9524	0.31451	10.5803	0.360582	44.6296	18.9483	0.746828	15.0594	10.1853	4.24426	96.0971	70.4731	29.8979	70.2053	8.81178e+07	10.8138	4.1523e+06	1.01747e+07	1.43034e+07	29.3055	71.2937	1.53284	3.75601	5.28014	1.95551e+06	2.19666e+06	4.53335e+06	5.64121e+06	13.8047	15.5042	31.7739	39.5484	448690	9.81301e+06	350218	3.60501e+06	151129	3.19584	69.2059	2.48734
Max	Income category	UMC	2.7089e+09	0.181168	8.38768e+08	0.848313	1.0122e+08	0.102371	90.0557	89.4182	0.319641	11.0472	0.374447	45.3379	19.5381	0.944556	15.824	10.8437	5.2576	96.5472	71.3837	30.6611	70.9473	9.22392e+07	11.4135	4.40994e+06	1.0984e+07	1.51068e+07	30.5309	72.7085	1.62794	4.05476	5.57674	2.06397e+06	2.34597e+06	4.92628e+06	6.05768e+06	14.3638	16.2214	32.6096	40.3671	456774	1.02828e+07	368612	4.22277e+06	160528	3.35857	71.4342	2.64262
Mean	UN Region	Africa	1.36033e+09	0.224168	3.04716e+08	0.6137	2.96754e+07	0.0597666	57.9845	56.9043	1.02574	41.5845	0.485507	6.02084	42.6338	0.129616	0.0597621	8.0603	0.672127	99.3279	12.3753	87.6247	14.1532	7.30757e+07	23.9816	8.32206e+06	7.5033e+06	1.58254e+07	52.59	47.41	6.11766	5.51578	11.6334	3.65685e+06	4.66522e+06	3.16713e+06	4.33617e+06	23.1091	29.481	20.0117	27.3983	546932	1.21838e+07	144077	2.59295e+06	357595	3.45686	76.9907	0.910585
Min	UN Region	Africa	1.36033e+09	0.224168	2.97653e+08	0.599476	2.76451e+07	0.0556775	56.1486	55.0811	0.991146	39.7172	0.450039	5.53512	40.7692	0.10541	0.0583256	7.43181	0.488218	98.8487	11.3827	86.6642	13.3625	6.73982e+07	21.9722	7.60448e+06	6.79139e+06	1.48257e+07	48.4968	43.7757	5.59015	4.99244	10.8986	3.3663e+06	4.23774e+06	2.84763e+06	3.88002e+06	21.5803	26.8108	18.5294	25.0796	525681	1.13582e+07	131653	2.22152e+06	328064	3.23803	72.8678	0.83104
Lower quartile	UN Region	Africa	1.36033e+09	0.224168	3.0339e+08	0.61103	2.92966e+07	0.0590035	57.6702	56.5925	1.01894	41.2757	0.478924	5.9306	42.3209	0.123863	0.0594996	7.91812	0.594333	99.2675	12.1801	87.4317	13.9924	7.19991e+07	23.6426	8.1692e+06	7.33596e+06	1.56375e+07	51.7473	46.5725	6.00529	5.39276	11.4953	3.59503e+06	4.56622e+06	3.10045e+06	4.23092e+06	22.7747	28.9223	19.7002	26.8303	542739	1.20262e+07	141293	2.49747e+06	351375	3.4181	76.5164	0.892731
Median	UN Region	Africa	1.36033e+09	0.224168	3.04727e+08	0.613722	2.96473e+07	0.0597099	57.9808	56.8995	1.02536	41.5885	0.485037	6.02528	42.6335	0.128398	0.0597574	8.05495	0.656251	99.3437	12.3784	87.6216	14.1489	7.30493e+07	23.9711	8.32179e+06	7.50471e+06	1.58182e+07	52.5694	47.4306	6.11746	5.51681	11.6282	3.65333e+06	4.66608e+06	3.16585e+06	4.33687e+06	23.102	29.4657	20.016	27.4047	546828	1.21813e+07	143857	2.58385e+06	357167	3.45583	77.0343	0.90921
Upper quartile	UN Region	Africa	1.36033e+09	0.224168	3.06047e+08	0.616381	3.00465e+07	0.0605139	58.2985	57.2125	1.03229	41.8933	0.491863	6.11582	42.9457	0.134148	0.0600207	8.1986	0.732466	99.4057	12.5683	87.8199	14.3116	7.41394e+07	24.3164	8.46913e+06	7.66795e+06	1.6016e+07	53.4275	48.2527	6.22577	5.63682	11.7736	3.71662e+06	4.76005e+06	3.23371e+06	4.44039e+06	23.4272	30.0263	20.3308	27.9541	550977	1.23402e+07	146632	2.67799e+06	363416	3.49625	77.5013	0.92711
Max	UN Region	Africa	1.36033e+09	0.224168	3.12207e+08	0.628788	3.23644e+07	0.0651823	59.8821	58.7842	1.06352	43.3858	0.524169	6.44313	44.5368	0.174473	0.0611776	8.86849	1.1513	99.5118	13.3358	88.6173	15.1597	7.93275e+07	25.9432	9.06961e+06	8.43857e+06	1.68818e+07	56.2243	51.5032	6.66719	6.2033	12.4101	3.98595e+06	5.11852e+06	3.58988e+06	4.88281e+06	24.7665	31.8798	21.9101	29.8223	567029	1.30027e+07	169644	3.34034e+06	393937	3.66594	79.2828	1.08497
Mean	UN Region	Americas	1.02486e+09	0.204086	4.84486e+08	1.29516	5.54572e+07	0.148252	92.9839	92.6132	0.202697	7.00189	0.18217	65.446	6.87089	0.734927	0.770226	18.7912	81.0471	18.9529	90.4986	9.50136	85.7324	2.77138e+07	5.7208	1.72378e+06	3.09493e+06	4.81871e+06	35.7744	64.2256	1.68196	3.01985	4.70181	806705	917074	1.36821e+06	1.72672e+06	16.7421	19.0323	28.393	35.8327	171842	3.74919e+06	101021	748619	48037.5	3.56701	77.8073	2.09692
Min	UN Region	Americas	1.02486e+09	0.204086	4.68142e+08	1.25146	5.29023e+07	0.141421	92.5199	92.1394	0.195495	6.58556	0.173582	63.4758	6.45334	0.342916	0.316723	17.5171	78.0338	16.0709	89.7924	8.94894	84.9108	2.62163e+07	5.37232	1.58589e+06	2.87807e+06	4.53074e+06	33.6119	62.1379	1.54742	2.80825	4.42083	747894	837961	1.27281e+06	1.59718e+06	15.7129	17.8234	27.4229	34.5164	167468	3.5153e+06	95486	627418	44177	3.35308	74.8299	1.93634
Lower quartile	UN Region	Americas	1.02486e+09	0.204086	4.81155e+08	1.28625	5.49628e+07	0.14693	92.9065	92.5343	0.201282	6.92234	0.180374	65.1379	6.79562	0.619533	0.636325	18.5096	80.5718	18.4651	90.392	9.39091	85.6114	2.74173e+07	5.64949	1.6988e+06	3.05233e+06	4.76379e+06	35.4096	63.8454	1.65759	2.97828	4.64822	794759	902639	1.34863e+06	1.70229e+06	16.5558	18.8054	28.2009	35.5975	170946	3.705e+06	99880.5	718538	47140.7	3.52766	77.3133	2.06622
Median	UN Region	Americas	1.02486e+09	0.204086	4.84393e+08	1.29491	5.54509e+07	0.148235	92.9847	92.6143	0.202707	7.00113	0.182144	65.4397	6.86925	0.718013	0.751712	18.7889	81.0656	18.9344	90.4977	9.50232	85.733	2.76991e+07	5.72037	1.7233e+06	3.09295e+06	4.81511e+06	35.781	64.219	1.68149	3.01792	4.69829	806413	916653	1.36732e+06	1.72526e+06	16.7381	19.029	28.3867	35.8268	171820	3.74657e+06	100976	746136	47957.1	3.56782	77.8332	2.09616
Upper quartile	UN Region	Americas	1.02486e+09	0.204086	4.87735e+08	1.30384	5.59329e+07	0.149523	93.0638	92.6943	0.204121	7.07892	0.183983	65.7617	6.94767	0.830328	0.884116	19.0741	81.5349	19.4282	90.6091	9.60798	85.855	2.79981e+07	5.79124	1.74758e+06	3.13672e+06	4.8743e+06	36.1546	64.5904	1.70518	3.06062	4.75605	817989	930800	1.38701e+06	1.75027e+06	16.9265	19.2606	28.5729	36.0618	172737	3.79118e+06	102143	776320	48870.9	3.60727	78.3221	2.12766
Max	UN Region	Americas	1.02486e+09	0.204086	5.01673e+08	1.3411	5.82945e+07	0.155836	93.4014	93.0395	0.210384	7.46447	0.19223	66.9067	7.41365	1.62999	1.66278	20.1597	83.9291	21.9662	91.0511	10.2076	86.3068	2.97014e+07	6.13158	1.86328e+06	3.34816e+06	5.13563e+06	37.8621	66.3881	1.81808	3.26693	5.01104	867313	1.00753e+06	1.48528e+06	1.86318e+06	17.8667	20.3565	29.476	37.2275	177566	4.00744e+06	107581	929441	53711.5	3.7581	80.2226	2.25964
Mean	UN Region	Asia	4.6357e+09	0.181728	1.16867e+09	0.690689	1.30405e+08	0.0770704	84.8867	84.0178	0.472371	15.042	0.467879	25.2342	32.404	1.33165	13.3971	11.6508	14.7307	85.2693	43.7803	56.2197	51.5631	1.57011e+08	13.4354	1.17493e+07	1.72568e+07	2.90061e+07	40.5071	59.4929	2.53453	3.72259	6.25712	5.25057e+06	6.49878e+06	7.36817e+06	9.88863e+06	18.102	22.4051	25.4018	34.0911	966101	1.88253e+07	610131	8.01271e+06	591860	3.33122	64.9013	2.10377
Min	UN Region	Asia	4.6357e+09	0.181728	1.14517e+09	0.676805	1.25493e+08	0.0741669	84.1657	83.2952	0.459261	14.3461	0.449919	24.5047	31.4474	1.08488	12.5069	10.9806	12.4838	82.34	42.2999	55.0105	50.6358	1.49539e+08	12.7855	1.09794e+07	1.62233e+07	2.7519e+07	38.0221	57.4578	2.36844	3.49965	5.93631	4.86593e+06	6.11344e+06	6.91443e+06	9.24057e+06	16.9489	21.0731	24.2448	32.7914	942419	1.76951e+07	583602	7.18329e+06	542982	3.16084	62.7752	1.97843
Lower quartile	UN Region	Asia	4.6357e+09	0.181728	1.16378e+09	0.6878	1.29493e+08	0.076531	84.7571	83.888	0.470336	14.9152	0.464604	25.0691	32.2249	1.27323	13.2136	11.5218	14.1875	84.7573	43.5464	55.9791	51.3557	1.55605e+08	13.308	1.1596e+07	1.70488e+07	2.87329e+07	40.1215	59.1032	2.50146	3.67771	6.19818	5.18163e+06	6.41028e+06	7.27394e+06	9.76097e+06	17.9138	22.1667	25.1951	33.8303	961707	1.86059e+07	604453	7.85764e+06	582186	3.30235	64.5128	2.07934
Median	UN Region	Asia	4.6357e+09	0.181728	1.16864e+09	0.690673	1.30398e+08	0.0770662	84.8878	84.0196	0.472381	15.0409	0.467816	25.2357	32.4027	1.3248	13.3953	11.6489	14.6916	85.3084	43.7802	56.2198	51.5628	1.5695e+08	13.43	1.17448e+07	1.7244e+07	2.89966e+07	40.4947	59.5053	2.53354	3.71982	6.25505	5.24597e+06	6.49455e+06	7.36215e+06	9.87962e+06	18.0974	22.399	25.394	34.0916	965940	1.88178e+07	610013	8.00322e+06	591645	3.33219	64.902	2.10383
Upper quartile	UN Region	Asia	4.6357e+09	0.181728	1.17358e+09	0.69359	1.31286e+08	0.0775907	85.0143	84.1448	0.474402	15.1707	0.471161	25.3986	32.5869	1.38324	13.5779	11.7769	15.2427	85.8125	44.0209	56.4536	51.7637	1.5844e+08	13.5577	1.18937e+07	1.74552e+07	2.92798e+07	40.8968	59.8785	2.56567	3.7654	6.31616	5.31709e+06	6.58462e+06	7.45622e+06	1.00115e+07	18.2825	22.6396	25.6025	34.3522	970375	1.90364e+07	615617	8.15281e+06	601238	3.35934	65.3028	2.12724
Max	UN Region	Asia	4.6357e+09	0.181728	1.19466e+09	0.706051	1.35395e+08	0.0800195	85.5877	84.7259	0.484637	15.7582	0.487343	26.0642	33.4323	1.75764	14.2954	12.4094	17.66	87.5162	44.9895	57.7001	52.5941	1.63898e+08	14.1164	1.26109e+07	1.857e+07	3.09726e+07	42.5422	61.9779	2.72039	4.00587	6.68132	5.66556e+06	7.01617e+06	7.93384e+06	1.06722e+07	19.0558	23.596	26.6002	35.6189	991971	2.01061e+07	644101	8.88111e+06	642032	3.48145	66.967	2.23799
Mean	UN Region	Europe	7.43843e+08	0.273988	3.42433e+08	1.26125	3.7316e+07	0.137443	96.5567	96.2229	0.162788	3.43767	0.176603	46.6656	17.7318	2.20246	12.5303	17.0928	88.9456	11.0544	72.4636	27.5364	78.486	1.93099e+07	5.63915	606229	2.05277e+06	2.659e+06	22.8354	77.1646	0.814996	2.75969	3.57468	291101	315128	905844	1.14693e+06	10.9651	11.8704	34.0506	43.114	97552.8	1.17974e+06	65900.1	1.29807e+06	17738.7	3.6749	44.4358	2.48234
Min	UN Region	Europe	7.43843e+08	0.273988	3.34172e+08	1.23083	3.57426e+07	0.131647	96.3706	96.0323	0.158662	3.2728	0.168166	44.3628	17.132	1.80353	11.0501	15.9707	86.5246	9.31645	71.0933	26.3425	77.7576	1.6976e+07	4.92664	574061	1.76355e+06	2.36405e+06	19.4581	74.3731	0.771751	2.37087	3.17816	275170	296576	782506	980813	9.3548	10.0617	32.6641	40.9927	94782.6	1.10335e+06	61910.5	1.02549e+06	16063.1	3.12198	37.8157	2.1234
Lower quartile	UN Region	Europe	7.43843e+08	0.273988	3.41008e+08	1.256	3.70205e+07	0.136354	96.524	96.1895	0.161915	3.40504	0.174742	46.3097	17.6023	2.12273	12.2393	16.8818	88.584	10.6358	72.231	27.305	78.3468	1.8679e+07	5.4556	598849	1.97243e+06	2.57824e+06	22.2051	76.4867	0.805074	2.65167	3.4661	287720	310804	870075	1.10217e+06	10.6656	11.536	33.6829	42.6808	96974.4	1.16458e+06	65037	1.21865e+06	17440.3	3.57647	43.2205	2.41362
Median	UN Region	Europe	7.43843e+08	0.273988	3.42421e+08	1.26121	3.73091e+07	0.137417	96.5581	96.2246	0.162769	3.43629	0.176474	46.6714	17.7295	2.19893	12.5201	17.0906	89.0002	10.9998	72.4672	27.5328	78.491	1.92152e+07	5.60992	605853	2.04084e+06	2.64737e+06	22.8918	77.1082	0.81449	2.74364	3.55904	290982	314902	900367	1.13956e+06	10.9961	11.8998	33.9966	43.0675	97540.5	1.17933e+06	65866.2	1.28541e+06	17736.5	3.6855	44.5781	2.48554
Upper quartile	UN Region	Europe	7.43843e+08	0.273988	3.4389e+08	1.26662	3.76144e+07	0.138541	96.5894	96.2568	0.163622	3.47026	0.178403	47.0248	17.8622	2.27998	12.8121	17.3017	89.3642	11.416	72.695	27.769	78.6276	1.98665e+07	5.80395	613321	2.12014e+06	2.72801e+06	23.5133	77.7949	0.82453	2.85025	3.66745	294356	319160	936352	1.18489e+06	11.2884	12.227	34.3573	43.4985	98108.7	1.19441e+06	66723.9	1.36573e+06	18024.9	3.78307	45.765	2.55683
Max	UN Region	Europe	7.43843e+08	0.273988	3.49856e+08	1.28859	3.8811e+07	0.142949	96.7219	96.3863	0.167727	3.62338	0.188787	48.6809	18.3658	2.63898	14.09	18.1969	90.6835	13.4754	73.6575	28.9067	79.174	2.30598e+07	6.7941	646344	2.51787e+06	3.1364e+06	25.6269	80.5419	0.868925	3.38495	4.21648	309824	339627	1.10977e+06	1.40811e+06	12.2416	13.4915	37.2349	46	101843	1.26473e+06	70756.5	1.72758e+06	19447	4.14919	49.2207	2.82135
Mean	UN Region	NA	2.57939e+07	0.306549	1.23997e+07	1.31704	1.55749e+06	0.165431	99.3603	99.2343	0.0614706	0.639323	0.0648645	66.7242	3.58576	0.00971926	10.7961	18.1185	97.3997	2.60035	94.8252	5.17482	95.6476	138129	1.12306	5510.03	16888.7	22398.8	24.8514	75.1486	0.213617	0.654757	0.868374	2885.45	2624.58	7516.67	9372.06	13.0243	11.8271	33.4475	41.701	1328.63	9299.48	1005.94	10649.3	115.437	6.02405	41.7804	4.55059
Min	UN Region	NA	2.57939e+07	0.306549	9.00506e+06	0.956482	994495	0.105631	99.0109	98.8739	0.0411694	0.402336	0.042201	33.0593	2.38017	0	0	5.37503	91.3554	1.07138	90.2604	2.99119	93.2327	88292.1	0.671071	3945.41	9653.56	14045.4	15.9442	64.4856	0.152959	0.374258	0.544523	2121.94	1823.47	4349.68	5303.89	8.13114	7.75694	28.593	35.2114	965.882	5692.62	639.464	5102.75	54.806	3.46328	27.9032	2.66362
Lower quartile	UN Region	NA	2.57939e+07	0.306549	1.16105e+07	1.23323	1.43313e+06	0.152221	99.3065	99.1775	0.057456	0.582177	0.0593313	61.4439	3.27652	0	4.91802	15.0261	96.9628	2.01077	94.2998	4.53361	95.3079	124927	0.994909	5123.91	14886.1	20204.4	23.0215	73.3856	0.198648	0.577118	0.783301	2687.5	2427.04	6619.63	8251.89	12.0146	10.9512	32.4808	40.5342	1235.89	8480.65	904.286	8996.37	100.437	5.38341	39.0214	4.00525
Median	UN Region	NA	2.57939e+07	0.306549	1.23406e+07	1.31076	1.54506e+06	0.16411	99.3661	99.2398	0.061323	0.633489	0.0643973	67.425	3.56604	0	9.55643	18.0185	97.5424	2.45765	94.9185	5.08152	95.6727	136771	1.111	5477.15	16671.7	22154	24.7758	75.2242	0.212343	0.646342	0.858884	2868.82	2603.25	7413.56	9232.15	12.9847	11.8035	33.4366	41.7094	1317.51	9203.26	991.86	10388.6	113.701	5.97082	41.7727	4.48041
Upper quartile	UN Region	NA	2.57939e+07	0.306549	1.31554e+07	1.39732	1.67279e+06	0.177677	99.4174	99.2965	0.0652247	0.693015	0.07007	72.6393	3.87249	0.002575	15.2214	21.1354	97.9892	3.03719	95.4664	5.70024	96.0087	150196	1.2372	5850.55	18691.1	24389.7	26.6144	76.9785	0.226819	0.724633	0.945561	3054.79	2799.65	8310.89	10363.4	13.966	12.6544	34.3897	42.8068	1409.59	10041.9	1093.23	12094.4	128.415	6.60347	44.494	5.01531
Max	UN Region	NA	2.57939e+07	0.306549	1.67635e+07	1.78055	2.44792e+06	0.260009	99.5975	99.4976	0.081708	0.988383	0.10053	88.4387	5.66685	0.294662	41.2658	36.9415	98.9286	8.64456	97.0088	9.73963	97.1131	222079	2.0007	7966.66	30858.9	37396.8	35.5144	84.0558	0.308858	1.19636	1.44983	4118.81	3847.85	14802.7	16324.1	18.4053	17.388	39.5828	49.5008	1873.46	13961.3	1585.78	22245.8	224.572	9.66072	58.4888	8.20929
Mean	UN Region	Oceania	4.37954e+07	0.207348	1.98627e+07	1.24256	2.17012e+06	0.135757	93.8408	93.5203	0.214956	6.14598	0.11879	63.9129	4.43201	2.56513	0	22.6102	95.9412	4.05877	93.5125	6.48754	89.0738	736188	3.70912	82967.5	80952.2	163920	50.6207	49.3793	1.89444	1.84842	3.74286	37378.3	45589.2	34175.7	46776.5	22.8117	27.8091	20.8486	28.5306	7467.62	131572	2577.01	19442	2861.57	4.57047	80.2395	1.57614
Min	UN Region	Oceania	4.37954e+07	0.207348	1.78569e+07	1.11708	1.73909e+06	0.108793	92.6049	92.2551	0.18905	5.05694	0.0961824	59.7705	3.47666	1.30551	0	19.2164	94.2002	2.85591	92.1252	5.03914	87.4126	558781	2.74801	59845.1	58123.5	129977	39.3359	39.0091	1.36647	1.32716	2.96782	28189.9	31519.8	23791.6	32413.2	18.0292	20.9494	16.0589	22.0512	6599.76	102543	2032	11336.8	1849.93	3.686	71.468	1.22409
Lower quartile	UN Region	Oceania	4.37954e+07	0.207348	1.94555e+07	1.21708	2.09524e+06	0.131073	93.6264	93.3004	0.209347	5.92205	0.114584	63.0391	4.24774	2.26153	0	21.9198	95.6586	3.75263	93.2268	6.19635	88.7618	703783	3.53714	77981.3	75860.8	156275	48.6445	47.4293	1.78058	1.73217	3.5683	35043.8	42544.1	31877.6	43687	21.8167	26.5436	19.8392	27.288	7286.34	124770	2455.24	17544.4	2611.77	4.38825	79.2736	1.49671
Median	UN Region	Oceania	4.37954e+07	0.207348	1.98648e+07	1.24269	2.16695e+06	0.135559	93.85	93.5298	0.214776	6.13684	0.118638	63.928	4.4237	2.53511	0	22.6231	95.9689	4.03109	93.5249	6.47508	89.083	735851	3.70885	82572.1	80645.4	163194	50.5494	49.4506	1.88541	1.84141	3.72628	37200	45307.7	34043.8	46579.6	22.7449	27.7571	20.8359	28.5403	7464.78	130986	2565.58	19277.3	2831.89	4.56775	80.3069	1.56943
Upper quartile	UN Region	Oceania	4.37954e+07	0.207348	2.02649e+07	1.26772	2.24239e+06	0.140278	94.0655	93.7513	0.220235	6.35941	0.122785	64.7657	4.60801	2.84849	0	23.2853	96.2474	4.34142	93.8036	6.77321	89.4006	768133	3.87695	87707.4	85879.6	171074	52.5707	51.3555	2.00266	1.96093	3.90621	39507.9	48378.4	36342.5	49684.9	23.7654	29.0091	21.8171	29.759	7643.3	137840	2687.17	21153.8	3089.54	4.74252	81.2661	1.65061
Max	UN Region	Oceania	4.37954e+07	0.207348	2.19716e+07	1.37449	2.60322e+06	0.162851	94.9335	94.6337	0.242914	7.37729	0.139833	68.1901	5.35125	4.98472	0	25.9472	97.1441	5.7998	94.9609	7.87485	90.5325	940111	4.6257	117046	109146	211482	60.9909	60.6641	2.67257	2.49218	4.82888	51548.4	66266.6	47493.2	65111	28.3452	35.0953	27.5685	35.1601	8546.9	174893	3363.07	35736.8	4529.21	5.67351	85.0049	2.06921
Mean	UN Subregion	Australia and New Zealand	3.06784e+07	0.475391	1.67257e+07	1.49369	1.764e+06	0.157533	99.9966	99.8833	0.0633694	0.00337356	0.0499528	71.2841	0.000121741	3.04621	0	25.5529	99.6664	0.333602	99.9998	0.000170889	99.8832	467.175	0.00279677	2744.81	43.2073	2788.02	98.4671	1.53287	0.0894706	0.0014084	0.090879	1897.3	847.509	19.2031	24.0042	68.0659	30.4012	0.681312	0.851553	1854.67	51.8595	880.859	0.364027	0.270093	66.5477	1.83968	31.59
Min	UN Subregion	Australia and New Zealand	3.06784e+07	0.475391	1.49846e+07	1.33819	1.49004e+06	0.133068	99.9885	99.8676	0.056867	0.000142785	0.0419398	67.0723	5.22608e-07	1.55844	0	21.5321	99.5752	0.255917	99.9988	7.2679e-07	99.8669	20.5605	0.000122131	2350.06	0.618081	2419.88	89.5686	0.0213442	0.0766031	2.01471e-05	0.0788789	1624.68	725.383	0.28276	0.335321	61.3927	27.5897	0.00976458	0.0115797	1604.04	0.731588	720.106	0.00128094	0	58.2945	0.025264	27.1132
Lower quartile	UN Subregion	Australia and New Zealand	3.06784e+07	0.475391	1.63174e+07	1.45722	1.70768e+06	0.152504	99.9956	99.8804	0.0619585	0.00211328	0.0483318	70.3386	4.75876e-05	2.68165	0	24.7367	99.651	0.317708	99.9998	6.70562e-05	99.8803	290.54	0.00173547	2659.36	18.7504	2695.64	98.0023	0.674946	0.0866851	0.000611191	0.0878677	1839.13	820.111	8.22236	10.3211	67.6601	30.1524	0.297866	0.376244	1798.3	22.2429	843.394	0.0780941	0.00784994	65.6922	0.810015	30.8407
Median	UN Subregion	Australia and New Zealand	3.06784e+07	0.475391	1.67326e+07	1.4943	1.76158e+06	0.157317	99.997	99.8834	0.0633683	0.00300168	0.049891	71.2945	9.20424e-05	3.01385	0	25.5394	99.6673	0.332735	99.9999	0.000129208	99.8832	418.593	0.00249918	2739.13	32.3537	2781.68	98.8242	1.17578	0.0892854	0.00105461	0.0906724	1893.02	845.767	14.3657	18.0308	68.2772	30.4366	0.520464	0.649549	1850.75	39.0031	878.646	0.185718	0.0849401	66.6868	1.40816	31.5858
Upper quartile	UN Subregion	Australia and New Zealand	3.06784e+07	0.475391	1.71192e+07	1.52882	1.81846e+06	0.162397	99.9979	99.8863	0.064795	0.00439924	0.051509	72.2154	0.000164043	3.38001	0	26.3791	99.6823	0.348983	99.9999	0.000230274	99.8862	605.529	0.0036356	2823.66	55.8704	2871.84	99.3251	1.99768	0.0920406	0.00182117	0.0936112	1952.14	873.717	24.8302	30.9245	68.7245	30.6944	0.882463	1.1083	1907.51	67.1182	914.569	0.421299	0.335895	67.5547	2.39846	32.3422
Max	UN Subregion	Australia and New Zealand	3.06784e+07	0.475391	1.86818e+07	1.66838	2.04957e+06	0.183036	99.9999	99.8983	0.0718687	0.0114442	0.0590616	75.953	0.000861168	5.93131	0	29.4041	99.7441	0.424827	100	0.00120302	99.8982	1605.29	0.00995099	3243.64	325.608	3521.34	99.9787	10.4314	0.105731	0.0106136	0.114783	2261.36	1021.86	165.187	170.328	69.8295	31.7944	5.29201	5.39841	2183.64	402.858	1108.62	12.0026	4.48984	70.2315	12.7683	36.6316
Mean	UN Subregion	Central Asia	7.47146e+07	0.280626	2.30252e+07	0.844315	2.5972e+06	0.0952372	76.4529	75.3494	0.608781	23.4035	0.638274	3.55875	62.5829	0.101361	0	9.10643	9.35945	90.6406	5.38261	94.6174	12.7075	5.43458e+06	23.6004	353391	618253	971644	36.3656	63.6344	4.72988	8.27487	13.0047	156051	197339	265790	352464	16.0598	20.3058	27.3567	36.2777	24530.9	593320	16576.3	323626	13590.7	2.53067	61.0318	1.70994
Min	UN Subregion	Central Asia	7.47146e+07	0.280626	2.10005e+07	0.770071	2.21139e+06	0.08109	71.7082	70.6583	0.557759	19.3276	0.548199	3.21579	57.8085	0.0766419	0	7.52224	5.9872	85.1567	4.76654	94.0483	10.9913	4.44626e+06	19.253	262817	497116	806190	28.7863	53.0954	3.51761	6.65354	10.7903	117884	141124	213303	281904	12.4867	16.2996	22.6749	29.8971	21804.1	446620	13228	235469	9497.56	2.0582	52.2456	1.30667
Lower quartile	UN Subregion	Central Asia	7.47146e+07	0.280626	2.26047e+07	0.828897	2.50896e+06	0.0920016	75.6128	74.5174	0.597499	22.5282	0.618364	3.49263	61.7122	0.0831279	0	8.72843	8.5274	89.877	5.25879	94.4952	12.317	5.22803e+06	22.861	331873	588354	929058	34.889	62.2602	4.44188	7.87469	12.4348	146415	184646	252189	334854	15.3853	19.4078	26.6434	35.4068	23884	559845	15825.3	303922	12714.6	2.44469	59.4163	1.62449
Median	UN Subregion	Central Asia	7.47146e+07	0.280626	2.30005e+07	0.843411	2.59207e+06	0.0950492	76.4865	75.3844	0.608149	23.3712	0.637504	3.55989	62.5772	0.0862392	0	9.09553	9.29245	90.7076	5.38324	94.6168	12.696	5.41649e+06	23.5767	351418	616246	968480	36.3209	63.6791	4.70347	8.248	12.9624	155024	195973	264428	350943	16.0251	20.2693	27.355	36.2915	24492	590579	16506.3	321860	13518.5	2.5276	61.0231	1.70662
Upper quartile	UN Subregion	Central Asia	7.47146e+07	0.280626	2.34445e+07	0.859693	2.67864e+06	0.0982238	77.3361	76.2213	0.619341	24.238	0.657639	3.62236	63.5033	0.104131	0	9.45841	10.123	91.4726	5.50484	94.7412	13.0819	5.62477e+06	24.3023	372290	645800	1.01051e+06	37.7398	65.111	4.98284	8.64356	13.5249	164338	208333	278108	368597	16.6769	21.1293	28.0846	37.1759	25142.5	623109	17258.8	341457	14379.3	2.61103	62.6807	1.79222
Max	UN Subregion	Central Asia	7.47146e+07	0.280626	2.54387e+07	0.932816	3.07043e+06	0.11259	80.5621	79.4029	0.675941	28.1066	0.737767	3.90082	66.8007	0.26524	0	10.9717	14.8433	94.0128	5.95167	95.2335	14.6712	6.53773e+06	27.5361	509918	817661	1.2866e+06	46.9046	71.2137	6.82489	10.9438	17.2202	236148	293457	348159	489230	21.313	27.8935	31.4783	41.7013	28158.5	851550	20880.5	439874	18987	2.98493	70.2035	2.14993
Mean	UN Subregion	Eastern Asia	1.63733e+09	0.16017	4.2661e+08	0.713843	5.15533e+07	0.0862637	94.6244	94.014	0.2742	5.36084	0.350916	41.4447	1.15074	1.28974	36.3353	13.7935	26.7408	73.2592	97.2984	2.7016	92.8467	1.54285e+07	3.61706	1.37691e+06	1.80826e+06	3.18517e+06	43.2284	56.7716	0.840948	1.1044	1.94535	668483	708425	804641	1.00362e+06	20.9879	22.2405	25.2624	31.5092	204712	2.61754e+06	180896	111063	70963.6	6.42888	82.1781	5.68048
Min	UN Subregion	Eastern Asia	1.63733e+09	0.16017	4.07726e+08	0.682244	4.78453e+07	0.0800591	94.2423	93.6266	0.263284	5.04418	0.327977	39.6673	0.915728	0.884102	34.5389	12.5707	21.8722	68.2397	96.3934	2.15207	92.2961	1.46281e+07	3.37275	1.27445e+06	1.6706e+06	2.98045e+06	40.9598	52.8849	0.778371	1.02032	1.82032	625429	649018	742982	927622	19.8052	20.8622	23.7262	29.1587	197295	2.43296e+06	167064	72053.1	63916.7	5.99001	78.7928	5.144
Lower quartile	UN Subregion	Eastern Asia	1.63733e+09	0.16017	4.22555e+08	0.707058	5.08213e+07	0.0850389	94.5573	93.9447	0.271995	5.28966	0.346045	41.088	1.08711	1.15602	35.9643	13.5026	25.7058	72.3066	97.1607	2.55339	92.7574	1.5257e+07	3.57007	1.35403e+06	1.78072e+06	3.14189e+06	42.8475	56.3987	0.826978	1.08758	1.91891	657848	695229	791814	987963	20.8003	22.0082	25.0769	31.2788	203101	2.57875e+06	177598	96173.7	69643.5	6.35592	81.8256	5.57718
Median	UN Subregion	Eastern Asia	1.63733e+09	0.16017	4.26443e+08	0.713564	5.15278e+07	0.086221	94.6278	94.0176	0.274236	5.35756	0.350788	41.4587	1.14517	1.25365	36.3219	13.7835	26.6811	73.3189	97.3116	2.68837	92.8495	1.54182e+07	3.61635	1.37356e+06	1.80664e+06	3.1815e+06	43.2073	56.7927	0.838906	1.10341	1.9431	667042	706259	803741	1.00273e+06	20.9767	22.22	25.2635	31.511	204615	2.61318e+06	180711	107419	70864.6	6.42934	82.2555	5.6789
Upper quartile	UN Subregion	Eastern Asia	1.63733e+09	0.16017	4.30566e+08	0.720462	5.22545e+07	0.087437	94.6958	94.0878	0.276417	5.42769	0.355769	41.8045	1.2106	1.39799	36.6945	14.0635	27.6934	74.2942	97.4466	2.83934	92.9391	1.55887e+07	3.66206	1.39637e+06	1.83328e+06	3.22397e+06	43.6013	57.1525	0.852833	1.11968	1.96904	677138	719335	815879	1.01762e+06	21.1652	22.4546	25.4507	31.7344	206209	2.6527e+06	183934	122001	72203.8	6.5055	82.6131	5.78144
Max	UN Subregion	Eastern Asia	1.63733e+09	0.16017	4.46339e+08	0.746855	5.56434e+07	0.0931076	94.9424	94.35	0.285239	5.74143	0.380271	43.1417	1.53627	2.09716	38.1604	15.4011	31.7603	78.1278	97.8479	3.60664	93.3	1.65151e+07	3.88017	1.57745e+06	1.95689e+06	3.45576e+06	47.1151	59.0402	0.963431	1.19517	2.11061	768961	830510	889520	1.11547e+06	22.9672	24.6781	26.5554	33.2648	214528	2.90213e+06	201935	235299	79966.9	6.83808	83.9795	6.2344
Mean	UN Subregion	Eastern Europe	2.92537e+08	0.358258	1.17824e+08	1.10347	1.22508e+07	0.114734	91.1227	90.4802	0.310539	8.84969	0.359556	31.3434	49.3489	5.38523e-06	0.882214	8.90566	43.718	56.282	38.843	61.157	41.1174	1.78926e+07	15.1861	499258	1.88351e+06	2.38277e+06	20.9925	79.0075	1.70665	6.43853	8.14518	230712	268546	830314	1.0532e+06	9.70065	11.2918	34.8284	44.1791	64030.3	1.02471e+06	44048.4	1.23362e+06	16357	2.69255	43.0839	1.85208
Min	UN Subregion	Eastern Europe	2.92537e+08	0.358258	1.14687e+08	1.07408	1.16163e+07	0.108791	90.6454	89.9997	0.30115	8.42829	0.337128	29.9698	48.0471	0	0.731596	7.91377	37.2642	49.6174	37.4527	59.5473	39.8073	1.56034e+07	13.2526	467259	1.60207e+06	2.08824e+06	17.7299	76.1962	1.59726	5.47648	7.13837	215249	251661	702349	890335	8.14193	9.50307	33.3942	42.2093	61802.5	944660	40580.4	975028	14840.6	2.24362	36.1094	1.55839
Lower quartile	UN Subregion	Eastern Europe	2.92537e+08	0.358258	1.17192e+08	1.09755	1.2125e+07	0.113555	91.0389	90.3948	0.308555	8.76319	0.354625	31.0879	49.0954	0	0.795764	8.67579	42.4655	55.036	38.5492	60.8718	40.8436	1.72647e+07	14.6564	492303	1.80595e+06	2.30387e+06	20.3565	78.3287	1.68287	6.1734	7.87548	227610	264495	795327	1.00928e+06	9.40954	10.9472	34.4477	43.7457	63555.2	1.01012e+06	43301.6	1.15591e+06	16071.5	2.61361	41.7848	1.79418
Median	UN Subregion	Eastern Europe	2.92537e+08	0.358258	1.17833e+08	1.10355	1.2253e+07	0.114754	91.1256	90.4842	0.310488	8.84682	0.359184	31.342	49.3574	0	0.843089	8.88719	43.7672	56.2328	38.8465	61.1535	41.1129	1.78003e+07	15.1014	499033	1.87094e+06	2.36975e+06	21.0618	78.9382	1.70588	6.39555	8.1007	230675	268449	823964	1.04612e+06	9.7353	11.3284	34.7648	44.1222	64015.2	1.02436e+06	43998.9	1.22164e+06	16347.7	2.70096	43.245	1.85499
Upper quartile	UN Subregion	Eastern Europe	2.92537e+08	0.358258	1.18441e+08	1.10925	1.23747e+07	0.115894	91.2097	90.567	0.312523	8.93305	0.364093	31.597	49.6159	0	0.957877	9.1164	44.964	57.5345	39.1282	61.4508	41.3776	1.84412e+07	15.6429	505850	1.95054e+06	2.44976e+06	21.6713	79.6435	1.72918	6.66767	8.37418	233617	272372	859845	1.09117e+06	10.0069	11.6614	35.1434	44.5639	64495.6	1.03849e+06	44768.1	1.29833e+06	16636.2	2.77784	44.4706	1.91421
Max	UN Subregion	Eastern Europe	2.92537e+08	0.358258	1.22264e+08	1.14505	1.29892e+07	0.121649	91.5456	90.8995	0.320604	9.32502	0.388153	32.7453	50.64	0.000331489	1.32443	10.2021	50.3826	62.7358	40.4527	62.5473	42.693	2.14727e+07	18.2596	541923	2.34802e+06	2.86297e+06	23.8038	82.2701	1.85249	8.0264	9.78669	249887	292036	1.03922e+06	1.31337e+06	10.936	12.8855	38.3495	47.1833	67513.2	1.10723e+06	48360.6	1.66421e+06	18079.3	3.046	48.4375	2.12096
Mean	UN Subregion	Latin America and the Caribbean	6.51326e+08	0.203582	2.40663e+08	1.01232	2.77555e+07	0.11675	85.8592	85.276	0.329867	14.0942	0.299943	62.5899	13.831	0.356454	0	8.49866	16.4503	83.5497	81.9016	18.0984	71.4251	2.77135e+07	11.5157	1.673e+06	3.09489e+06	4.76789e+06	35.0906	64.9094	2.56861	4.75167	7.32028	771729	901276	1.36818e+06	1.7267e+06	16.1868	18.9038	28.6951	36.2143	138926	3.74906e+06	83252.1	748619	48037.3	2.91447	78.6341	1.7465
Min	UN Subregion	Latin America and the Caribbean	6.51326e+08	0.203582	2.34457e+08	0.986214	2.67705e+07	0.112607	85.1237	84.5498	0.320096	13.4578	0.28153	61.293	13.2054	0.323566	0	7.59659	13.049	79.8292	80.9108	17.2889	70.5964	2.62154e+07	10.942	1.53576e+06	2.87805e+06	4.47957e+06	32.9314	62.8041	2.35789	4.41875	6.87762	712520	822382	1.27276e+06	1.59717e+06	15.1309	17.6872	27.719	34.881	134937	3.51527e+06	78012.5	627418	44176.9	2.71886	75.6177	1.59879
Lower quartile	UN Subregion	Latin America and the Caribbean	6.51326e+08	0.203582	2.39637e+08	1.008	2.75432e+07	0.115857	85.7347	85.1519	0.327945	13.9694	0.296978	62.3912	13.7026	0.343348	0	8.32774	15.7066	82.8753	81.7447	17.9329	71.2619	2.74169e+07	11.3936	1.64818e+06	3.05233e+06	4.713e+06	34.7217	64.5261	2.5305	4.68633	7.23601	759790	886838	1.34862e+06	1.70227e+06	16.0003	18.6739	28.5014	35.977	138081	3.70489e+06	82114.4	718538	47140.3	2.88291	78.1352	1.7181
Median	UN Subregion	Latin America and the Caribbean	6.51326e+08	0.203582	2.40614e+08	1.01211	2.77515e+07	0.116733	85.8622	85.2799	0.329868	14.0913	0.29993	62.5904	13.8284	0.350339	0	8.48805	16.3964	83.6036	81.9033	18.0967	71.4294	2.76986e+07	11.5136	1.67257e+06	3.09294e+06	4.76437e+06	35.0965	64.9035	2.56795	4.74868	7.31488	771402	900757	1.36725e+06	1.72524e+06	16.1851	18.8992	28.6893	36.2084	138906	3.74631e+06	83228.9	746136	47956.9	2.9156	78.658	1.7455
Upper quartile	UN Subregion	Latin America and the Caribbean	6.51326e+08	0.203582	2.41708e+08	1.01672	2.79615e+07	0.117617	85.9846	85.4011	0.331687	14.2182	0.3028	62.7901	13.9561	0.361305	0	8.65629	17.1247	84.2934	82.0671	18.2553	71.5843	2.7998e+07	11.6318	1.69669e+06	3.13667e+06	4.82357e+06	35.4739	65.2783	2.60498	4.81582	7.40577	783070	914946	1.387e+06	1.75026e+06	16.3718	19.1333	28.8776	36.4463	139734	3.79105e+06	84326.8	776320	48870.7	2.94617	79.1525	1.77372
Max	UN Subregion	Latin America and the Caribbean	6.51326e+08	0.203582	2.46653e+08	1.03752	2.90788e+07	0.122317	86.4986	85.9169	0.343595	14.827	0.316733	63.5297	14.5811	0.483742	0	9.82516	20.1708	86.951	82.7111	19.0892	72.2515	2.97008e+07	12.2081	1.8126e+06	3.34815e+06	5.08555e+06	37.1959	67.0686	2.78293	5.1405	7.80799	831523	991688	1.48527e+06	1.86313e+06	17.3187	20.2371	29.7799	37.6093	143928	4.00727e+06	89489.8	929441	53711.5	3.07857	81.0594	1.89811
Mean	UN Subregion	Melanesia	1.18931e+07	0.147822	2.60727e+06	0.600618	285782	0.0658337	54.7402	53.5886	1.15273	44.7374	0.52123	16.3669	30.5147	0.000266225	0	6.70683	9.56374	90.4363	34.8522	65.1478	22.9682	693018	26.5891	76798	76116.3	152914	50.2272	49.7728	6.45737	6.40006	12.8574	33922.1	42875.9	32124.4	43991.9	22.1905	28.0367	21.0086	28.7642	5257.49	126011	1489.68	17401.6	2754.4	3.4493	82.3852	0.975703
Min	UN Subregion	Melanesia	1.18931e+07	0.147822	2.28615e+06	0.526646	219743	0.0506208	48.1275	46.9764	1.00998	38.5499	0.396692	10.1235	24.9948	0	0	4.10836	0	52.7532	23.7746	54.2154	16.8805	495863	20.7205	53793.1	52946.7	117338	38.4719	37.9967	4.52306	4.4519	9.86604	24687.1	28861.9	21995.1	29982.1	17.2124	20.7021	15.9669	21.5163	4488.97	95838.8	1009.18	9779.93	1785.26	2.72768	73.2151	0.689771
Lower quartile	UN Subregion	Melanesia	1.18931e+07	0.147822	2.53721e+06	0.584479	269571	0.0620992	53.4958	52.3485	1.12425	43.5347	0.494978	14.8356	29.3835	0	0	5.9631	1.55134	84.6222	32.2569	62.6416	21.4319	661316	25.4804	71806.2	71107.9	145228	48.0953	47.7093	6.03765	5.97894	12.2111	31578.2	39919	29816.4	40905.3	21.1265	26.6684	19.9278	27.4492	5081.58	119260	1374.98	15561.4	2506.01	3.30467	81.4163	0.907617
Median	UN Subregion	Melanesia	1.18931e+07	0.147822	2.60792e+06	0.600769	285118	0.0656806	54.7217	53.5639	1.15268	44.7557	0.519223	16.24	30.4974	0	0	6.57467	5.94447	94.0555	34.8092	65.1908	22.9397	692637	26.5895	76442.9	75827.3	152227	50.182	49.818	6.42751	6.37575	12.7996	33771.7	42624	31972	43839.8	22.133	27.9709	20.9925	28.7871	5250.55	125463	1479.89	17233.7	2722.55	3.44284	82.4647	0.968915
Upper quartile	UN Subregion	Melanesia	1.18931e+07	0.147822	2.67496e+06	0.616213	300861	0.0693072	55.9711	54.8047	1.18155	45.9549	0.547184	17.804	31.6164	0	0	7.31729	15.3778	98.4487	37.3584	67.7431	24.4794	724201	27.6829	81488.5	80982.8	160021	52.2907	51.9047	6.85176	6.80924	13.455	36023.7	45634.9	34251.7	46873.4	23.212	29.3231	22.0236	30.0629	5421.03	132338	1593.1	19029	2977.84	3.58406	83.4273	1.03793
Max	UN Subregion	Melanesia	1.18931e+07	0.147822	3.01432e+06	0.694388	388503	0.0894968	61.0568	59.8812	1.29417	51.2153	0.685658	22.8403	36.8689	0.0039698	0	11.7668	47.2468	100	45.7846	76.2254	29.2933	893882	32.3057	110970	103408	201003	62.0033	61.5281	9.33061	8.69483	16.9008	47907.6	63391.4	45431.6	61822.7	28.0996	35.6698	28.1498	35.7727	6370.16	169439	2282.94	33249.1	4342.06	4.33077	87.0055	1.37783
Mean	UN Subregion	Micronesia	521059	0.201698	207258	1.08976	27459.3	0.144381	86.3489	85.764	0.396748	13.5965	0.242809	69.6051	8.62593	0	0	7.53296	70.1467	29.8533	88.9497	11.0503	77.104	17749	8.58535	1557.22	1901.37	3458.59	45.0638	54.9362	2.98856	3.64905	6.63761	709.034	848.183	813.734	1087.64	20.5521	24.5116	23.5227	31.4135	143.69	2722.86	66.3667	455.204	70.4693	4.22535	78.7703	1.95308
Min	UN Subregion	Micronesia	521059	0.201698	158675	0.834314	17466.9	0.0918406	78.7482	78.1006	0.303305	10.3252	0.111123	56.1901	6.32044	0	0	1.81723	19.5686	4.56649	80.1563	7.70161	64.9449	6994.07	3.4229	710.573	770.222	2363.64	20.6626	28.566	1.36371	1.47818	4.53623	318.888	325.147	287.993	442.423	10.0978	10.5647	10.4904	16.3757	108.548	2038.15	26.5771	41.5898	10.5726	2.05056	62.2898	0.678212
Lower quartile	UN Subregion	Micronesia	521059	0.201698	197629	1.03913	25037.3	0.131646	85.5233	84.9149	0.371461	12.5749	0.214669	67.489	7.89869	0	0	5.6626	62.2469	20.4465	88.1467	10.0396	75.7738	14664.3	7.0905	1272.83	1588.61	3059.51	38.2631	48.6288	2.44278	3.04881	5.87172	576.17	674.25	667.357	892.039	17.4125	20.3383	20.2923	27.3068	133.346	2384.07	57.738	299.243	42.4753	3.86624	75.5572	1.67465
Median	UN Subregion	Micronesia	521059	0.201698	207152	1.08921	27308.7	0.143589	86.5595	85.9767	0.392829	13.3874	0.241035	69.7321	8.47953	0	0	7.26735	72.1948	27.8052	89.1645	10.8355	77.3799	17753.6	8.56584	1520.65	1848.64	3322.46	45.1697	54.8303	2.91839	3.54785	6.37635	686.205	819.569	786.767	1051.78	20.2614	24.2387	23.2841	31.2574	141.855	2593.73	65.5926	422.192	61.3355	4.24	79.1417	1.93382
Upper quartile	UN Subregion	Micronesia	521059	0.201698	216965	1.1408	29625.6	0.155771	87.3784	86.8149	0.417943	14.4154	0.268556	71.8646	9.1709	0	0	9.13856	79.5535	37.7531	89.9604	11.8533	78.6899	20586	9.97924	1761.73	2154.53	3699.02	51.3712	61.7369	3.38105	4.1349	7.09904	808.725	974.134	932.618	1242.77	23.4617	28.1728	26.4428	35.3297	151.644	2901.04	74.1416	584.247	88.6516	4.60256	82.3651	2.21049
Max	UN Subregion	Micronesia	521059	0.201698	260944	1.37204	51077.1	0.268563	89.6406	89.1216	0.584061	21.1361	0.464091	78.4265	14.9225	0	0	18.0947	95.4335	80.4314	92.2984	19.8437	82.4453	33128.6	17.4414	4570.44	5302.15	9872.59	71.434	79.3374	8.77145	10.1757	18.9472	2521.85	3149.91	2748.96	2668.85	38.4152	47.5332	39.0652	50.7372	227.771	8496.31	142.067	1574.39	307.703	6.43147	92.3036	3.60724
Mean	UN Subregion	NA	2.57939e+07	0.306549	1.23997e+07	1.31704	1.55749e+06	0.165431	99.3603	99.2343	0.0614706	0.639323	0.0648645	66.7242	3.58576	0.00971926	10.7961	18.1185	97.3997	2.60035	94.8252	5.17482	95.6476	138129	1.12306	5510.03	16888.7	22398.8	24.8514	75.1486	0.213617	0.654757	0.868374	2885.45	2624.58	7516.67	9372.06	13.0243	11.8271	33.4475	41.701	1328.63	9299.48	1005.94	10649.3	115.437	6.02405	41.7804	4.55059
Min	UN Subregion	NA	2.57939e+07	0.306549	9.00506e+06	0.956482	994495	0.105631	99.0109	98.8739	0.0411694	0.402336	0.042201	33.0593	2.38017	0	0	5.37503	91.3554	1.07138	90.2604	2.99119	93.2327	88292.1	0.671071	3945.41	9653.56	14045.4	15.9442	64.4856	0.152959	0.374258	0.544523	2121.94	1823.47	4349.68	5303.89	8.13114	7.75694	28.593	35.2114	965.882	5692.62	639.464	5102.75	54.806	3.46328	27.9032	2.66362
Lower quartile	UN Subregion	NA	2.57939e+07	0.306549	1.16105e+07	1.23323	1.43313e+06	0.152221	99.3065	99.1775	0.057456	0.582177	0.0593313	61.4439	3.27652	0	4.91802	15.0261	96.9628	2.01077	94.2998	4.53361	95.3079	124927	0.994909	5123.91	14886.1	20204.4	23.0215	73.3856	0.198648	0.577118	0.783301	2687.5	2427.04	6619.63	8251.89	12.0146	10.9512	32.4808	40.5342	1235.89	8480.65	904.286	8996.37	100.437	5.38341	39.0214	4.00525
Median	UN Subregion	NA	2.57939e+07	0.306549	1.23406e+07	1.31076	1.54506e+06	0.16411	99.3661	99.2398	0.061323	0.633489	0.0643973	67.425	3.56604	0	9.55643	18.0185	97.5424	2.45765	94.9185	5.08152	95.6727	136771	1.111	5477.15	16671.7	22154	24.7758	75.2242	0.212343	0.646342	0.858884	2868.82	2603.25	7413.56	9232.15	12.9847	11.8035	33.4366	41.7094	1317.51	9203.26	991.86	10388.6	113.701	5.97082	41.7727	4.48041
Upper quartile	UN Subregion	NA	2.57939e+07	0.306549	1.31554e+07	1.39732	1.67279e+06	0.177677	99.4174	99.2965	0.0652247	0.693015	0.07007	72.6393	3.87249	0.002575	15.2214	21.1354	97.9892	3.03719	95.4664	5.70024	96.0087	150196	1.2372	5850.55	18691.1	24389.7	26.6144	76.9785	0.226819	0.724633	0.945561	3054.79	2799.65	8310.89	10363.4	13.966	12.6544	34.3897	42.8068	1409.59	10041.9	1093.23	12094.4	128.415	6.60347	44.494	5.01531
Max	UN Subregion	NA	2.57939e+07	0.306549	1.67635e+07	1.78055	2.44792e+06	0.260009	99.5975	99.4976	0.081708	0.988383	0.10053	88.4387	5.66685	0.294662	41.2658	36.9415	98.9286	8.64456	97.0088	9.73963	97.1131	222079	2.0007	7966.66	30858.9	37396.8	35.5144	84.0558	0.308858	1.19636	1.44983	4118.81	3847.85	14802.7	16324.1	18.4053	17.388	39.5828	49.5008	1873.46	13961.3	1585.78	22245.8	224.572	9.66072	58.4888	8.20929
Mean	UN Subregion	Northern Africa	2.51331e+08	0.100412	7.58287e+07	0.826599	7.86827e+06	0.0857711	83.7356	82.8598	0.433521	16.1939	0.51281	11.7468	62.3805	0.108386	0	8.62412	0.00932309	99.9907	15.8474	84.1526	20.4473	1.48097e+07	19.5305	751298	1.47568e+06	2.22698e+06	33.7467	66.2533	2.98928	5.87147	8.86075	322947	428350	620733	854948	14.506	19.2407	27.8689	38.3844	57524.2	1.1893e+06	40342.7	915553	24257.3	2.58667	53.4092	1.81355
Min	UN Subregion	Northern Africa	2.51331e+08	0.100412	7.29748e+07	0.795489	6.63747e+06	0.0723543	81.7068	80.8561	0.403023	14.3161	0.454412	11.0331	60.0112	0.0546595	0	7.30771	0	99.8309	14.7051	83.072	18.9607	1.19723e+07	15.9542	578354	1.20163e+06	1.9289e+06	26.7898	58.5969	2.30117	4.78109	7.67476	250276	320564	512983	687715	11.7273	15.0625	24.0177	33.4769	51797.9	986640	33841.5	723770	17771	2.20594	45.2425	1.50199
Lower quartile	UN Subregion	Northern Africa	2.51331e+08	0.100412	7.52028e+07	0.819777	7.68624e+06	0.0837868	83.3614	82.4873	0.426148	15.8074	0.499034	11.5877	61.9433	0.0858068	0	8.29677	0	99.9932	15.634	83.9467	20.1233	1.41507e+07	18.6895	715862	1.41915e+06	2.16315e+06	32.3404	64.8675	2.84829	5.64653	8.6068	307157	406820	595610	820348	13.8803	18.3602	27.1929	37.438	56426.9	1.14484e+06	39028.2	871563	22518.5	2.50793	52.165	1.74867
Median	UN Subregion	Northern Africa	2.51331e+08	0.100412	7.58212e+07	0.826518	7.86483e+06	0.0857336	83.7472	82.8749	0.432994	16.1832	0.51251	11.7421	62.3873	0.100054	0	8.60714	0.000746326	99.9993	15.8432	84.1568	20.4371	1.47959e+07	19.5161	750551	1.47195e+06	2.22389e+06	33.7183	66.2817	2.98631	5.85663	8.84848	322279	427641	618710	852209	14.4835	19.2119	27.8453	38.377	57444.3	1.18742e+06	40288.4	912003	24050.5	2.58547	53.4279	1.81042
Upper quartile	UN Subregion	Northern Africa	2.51331e+08	0.100412	7.64591e+07	0.833472	8.04514e+06	0.0876991	84.1237	83.2444	0.440385	16.566	0.52549	11.8995	62.8081	0.12339	0	8.92145	0.00675221	100	16.0533	84.366	20.7553	1.54472e+07	20.3366	785394	1.52846e+06	2.28858e+06	35.1325	67.6596	3.12494	6.08148	9.10585	337630	449931	644174	887216	15.097	20.1153	28.5165	39.311	58592.6	1.23072e+06	41591.9	955010	25730.7	2.66158	54.7064	1.87837
Max	UN Subregion	Northern Africa	2.51331e+08	0.100412	7.91929e+07	0.863272	8.8285e+06	0.0962385	85.6236	84.7697	0.474943	18.2127	0.587911	12.5554	64.5204	0.277953	0	10.4234	0.169142	100	16.928	85.2949	22.1701	1.82734e+07	24.1278	937376	1.82658e+06	2.55155e+06	41.4031	73.2102	3.72965	7.26764	10.1522	412663	550092	780893	1.05044e+06	18.1083	24.5051	32.4213	43.1761	64539.3	1.40831e+06	46702	1.21359e+06	38548.7	3.01431	60.3689	2.22601
Mean	UN Subregion	Northern America	3.73537e+08	0.213399	2.43823e+08	1.78833	2.69634e+07	0.197765	99.9996	99.8565	0.0771619	0.000447801	0.0659107	68.2658	0	1.10829	1.5307	28.9517	99.776	0.224033	100	0	99.8565	369.148	0.000151444	50774.7	45.3544	50820	99.911	0.0889595	0.135929	0.000121419	0.136051	34976.4	15798.3	27.9817	17.3727	68.8246	31.0864	0.0548832	0.0340763	32916.8	134.055	17769	0	0.16963	64.7752	0.262953	34.9615
Min	UN Subregion	Northern America	3.73537e+08	0.213399	2.27891e+08	1.67148	2.50221e+07	0.183526	99.9973	99.8454	0.0730089	0	0.0609052	64.3765	0	0.325938	0.634842	26.2609	99.7397	0.190433	100	0	99.8454	0	0	47341.2	0	47347.3	99.0971	0	0.126738	0	0.126754	32555	14723.3	0	0	67.9586	30.5843	0	0	30824.1	0	16044	0	0	62.2138	0	33.2346
Lower quartile	UN Subregion	Northern America	3.73537e+08	0.213399	2.40564e+08	1.76443	2.65291e+07	0.194579	99.9993	99.8547	0.0763014	9.36365e-05	0.0649098	67.6665	0	0.879204	1.26525	28.4517	99.7696	0.217522	100	0	99.8547	52.6556	2.1506e-05	50097.9	5.3495	50132.9	99.8816	0.0105602	0.134118	1.43212e-05	0.134211	34510.3	15574.9	3.27474	2.00338	68.7216	30.9883	0.00648994	0.00397634	32519.8	23.492	17430.2	0	5.49926e-05	64.441	0.0465166	34.6327
Median	UN Subregion	Northern America	3.73537e+08	0.213399	2.43696e+08	1.7874	2.69463e+07	0.197639	99.9997	99.8565	0.0771538	0.000312607	0.065908	68.2668	0	1.07364	1.49308	28.9551	99.7762	0.223827	100	0	99.8565	209.343	8.57344e-05	50748.6	23.7055	50791.4	99.953	0.0469591	0.13586	6.34622e-05	0.135974	34966.9	15788.1	14.1995	8.72039	68.838	31.0831	0.0280599	0.0171188	32897.7	84.3865	17760.2	0	0.0206899	64.7806	0.166139	34.9642
Upper quartile	UN Subregion	Northern America	3.73537e+08	0.213399	2.47011e+08	1.81172	2.74011e+07	0.200975	99.9999	99.8583	0.0779942	0.000659651	0.066889	68.8749	0	1.29407	1.75727	29.4802	99.7825	0.230364	100	0	99.8583	530.097	0.000217201	51421.6	60.4357	51471.1	99.9894	0.118355	0.137661	0.000161793	0.137794	35424.6	16014.4	37.2533	22.8965	68.9424	31.1815	0.0734217	0.0450716	33305.9	189.875	18087.9	0	0.175972	65.1276	0.373527	35.2895
Max	UN Subregion	Northern America	3.73537e+08	0.213399	2.59424e+08	1.90276	2.94143e+07	0.215741	100	99.8649	0.0815297	0.0027392	0.0712883	71.1756	0	2.88348	3.29009	31.4059	99.8096	0.260252	100	0	99.8649	3233.99	0.00132207	55214.8	472.113	55332.2	100	0.902918	0.147816	0.0012639	0.148131	38048	17166.8	286.025	259.529	69.3732	31.591	0.551226	0.496351	35443.3	1074.95	20232.3	0	5.87957	66.6524	2.0745	37.303
Mean	UN Subregion	Northern Europe	1.05542e+08	0.205334	5.1324e+07	1.3323	5.69392e+06	0.147807	99.9646	99.8446	0.0675116	0.0354144	0.0524646	52.6069	0	3.58475	20.013	23.64	99.6139	0.38614	100	0	99.8446	6177.52	0.0120384	10383.5	683.45	11066.9	93.8906	6.10935	0.0983826	0.00647564	0.104858	7076.66	3306.81	420.75	262.7	64.0012	29.8895	3.76141	2.34794	6064.22	2001.38	2986.75	0	14.5755	54.9343	17.882	27.0524
Min	UN Subregion	Northern Europe	1.05542e+08	0.205334	4.91456e+07	1.27576	5.13361e+06	0.133262	99.9244	99.8035	0.0626287	0.0186613	0.0468482	48.3213	0	2.42215	17.1419	21.5644	99.5451	0.325881	100	0	99.8034	1345.77	0.00256362	9027.04	142.369	9388.39	83.7223	1.37799	0.0855305	0.00134893	0.0889543	6170.86	2780.37	88.9003	46.7369	56.1158	25.6441	0.852767	0.466959	5511.13	949.084	2555.94	0	5.45014	40.7686	9.44874	19.8415
Lower quartile	UN Subregion	Northern Europe	1.05542e+08	0.205334	5.08506e+07	1.32002	5.59414e+06	0.145216	99.9589	99.8386	0.0663322	0.0291116	0.0512599	51.8413	0	3.36376	19.3582	23.2517	99.5979	0.369832	100	0	99.8385	4522.15	0.00876654	10034.1	496.117	10618.6	92.6879	4.59362	0.095072	0.00470067	0.10061	6851.9	3169.97	302.904	186.434	63.121	29.3121	2.79531	1.72217	5945.72	1590.41	2911.59	0	11.9602	53.3833	14.9402	26.1706
Median	UN Subregion	Northern Europe	1.05542e+08	0.205334	5.13068e+07	1.33186	5.69124e+06	0.147737	99.9668	99.8465	0.0673772	0.0331426	0.0523152	52.6393	0	3.5725	19.986	23.6342	99.6138	0.386197	100	0	99.8465	5996.64	0.0116938	10309.6	650.67	10933	94.0417	5.95827	0.0976822	0.00616505	0.10359	7034.96	3276.57	397.189	246.811	64.1335	29.8536	3.63696	2.25344	6054.12	1848.49	2981.03	0	14.2012	55.5208	16.9596	27.307
Upper quartile	UN Subregion	Northern Europe	1.05542e+08	0.205334	5.17713e+07	1.34391	5.79202e+06	0.150353	99.9709	99.8512	0.0685575	0.0410891	0.0535424	53.3503	0	3.7968	20.6461	24.0176	99.6302	0.402056	100	0	99.8512	7472.48	0.0145734	10666.4	810.587	11418.1	95.4064	7.31212	0.101063	0.00768025	0.108186	7260.3	3412.72	504.703	316.059	65.0985	30.452	4.49329	2.8404	6175.29	2281.21	3059.48	0	16.757	56.9448	20.1775	28.0853
Max	UN Subregion	Northern Europe	1.05542e+08	0.205334	5.39423e+07	1.40027	6.2487e+06	0.162208	99.9813	99.8659	0.0736262	0.0755217	0.0610862	56.1636	0	4.76985	23.8959	25.7923	99.6741	0.454919	100	0	99.8659	16710.1	0.0327061	14667.4	2254.53	15693.2	98.622	16.2777	0.138972	0.0213615	0.148692	9775.88	4891.51	1436.94	904.371	68.3269	33.2241	10.9568	7.00012	6752.09	6155.78	3412.06	0	31.5712	60.7498	39.2258	30.9234
Mean	UN Subregion	Polynesia	702876	0.194467	322515	1.25712	39474.6	0.153867	91.8889	91.174	0.384686	8.07891	0.362425	61.551	21.2003	0.0318562	0	8.39073	60.8964	39.1036	74.2408	25.7592	69.962	24953.7	7.96531	1867.54	2891.35	4758.9	39.9505	60.0495	2.657	4.1136	6.7706	849.931	1017.61	1218.41	1672.94	18.1916	21.7588	25.3064	34.7431	211.774	2785.81	140.1	1584.78	36.4316	4.57523	59.4388	3.02741
Min	UN Subregion	Polynesia	702876	0.194467	173809	0.677486	19169	0.0747184	83.5393	82.6287	0.227273	3.89399	0.154843	38.3197	9.39943	0.0068682	0	0.904242	1.20973	3.25217	50.7641	10.3577	48.8848	11274.1	3.13389	929.397	1097.52	2674.66	17.6158	31.4195	1.32228	1.56147	3.80531	421.309	467.551	453.15	644.372	7.94093	8.51783	12.4015	18.094	144.365	1663.21	56.7264	356.675	10.4033	2.22928	29.7421	1.03074
Lower quartile	UN Subregion	Polynesia	702876	0.194467	275457	1.0737	33589.3	0.130927	90.6897	89.9121	0.336688	6.63363	0.299183	55.8603	17.4706	0.0137766	0	4.02878	43.7504	19.0338	70.0853	21.0338	65.5388	20263.2	6.21096	1586.24	2278.68	4068.22	33.8796	54.3758	2.25678	3.24194	5.78796	715.944	846.343	941.225	1302.89	15.3064	18.1783	22.0962	30.8601	196.288	2404.54	117.194	1041.2	26.8091	4.02813	53.1892	2.45075
Median	UN Subregion	Polynesia	702876	0.194467	312802	1.21927	38217.1	0.148966	92.1006	91.3728	0.383743	7.86939	0.353338	61.47	20.8563	0.0172879	0	6.5684	64.9944	35.0056	74.6843	25.3157	70.352	23864.1	7.59399	1803.74	2744.78	4620.66	39.4615	60.5385	2.56623	3.90506	6.57392	818.003	979.031	1142.36	1581.11	17.865	21.4311	25.0094	34.6593	210.352	2669.38	136.774	1410.74	33.4335	4.55903	60.0186	2.93827
Upper quartile	UN Subregion	Polynesia	702876	0.194467	368576	1.43667	44936.5	0.175157	93.3422	92.6845	0.42791	9.27237	0.416334	67.3086	24.5156	0.0236903	0	12.1101	80.9662	56.2496	78.9662	29.9147	74.6178	28573.4	9.33158	2077.83	3367.34	5305.49	45.6242	66.1204	2.95618	4.79081	7.54826	945.465	1141.31	1418.96	1951.34	20.6465	24.8886	28.2637	38.4488	226.197	3077.81	159.43	1969.73	42.1691	5.07967	66.2614	3.51311
Max	UN Subregion	Polynesia	702876	0.194467	491572	1.91609	68578.7	0.267311	96.0952	95.5422	0.576946	16.3674	0.908431	82.6973	39.7864	0.172717	0	32.1464	96.7478	98.7903	89.6423	49.2359	85.6174	61539.2	23.7914	3874.41	7704.59	10163.8	68.5805	82.3842	5.51221	10.9615	14.4602	2020.16	2279.45	3409.2	5624.68	34.2499	45.8973	46.255	55.9948	310.059	5107.05	327.017	5629.7	177.878	7.56459	83.1877	6.80168
Mean	UN Subregion	South-eastern Asia	6.68357e+08	0.194741	1.89553e+08	0.777014	2.34485e+07	0.0961198	78.4139	77.4108	0.597276	21.4572	0.53479	23.4359	44.031	0.597001	0.663626	8.68322	2.47708	97.5229	34.7377	65.2623	33.3221	3.53776e+07	18.6637	2.98479e+06	4.37224e+06	7.35704e+06	40.5695	59.4305	4.46586	6.54177	11.0076	1.31331e+06	1.67148e+06	1.85672e+06	2.51553e+06	17.8511	22.7184	25.2379	34.1925	198131	4.89458e+06	125398	2.02959e+06	109337	2.69412	66.5257	1.70508
Min	UN Subregion	South-eastern Asia	6.68357e+08	0.194741	1.84503e+08	0.756314	2.18132e+07	0.0894163	76.8503	75.8743	0.577074	19.9764	0.496068	22.4491	42.3476	0.530337	0.644707	7.77898	1.28217	93.5951	33.1434	63.7757	32.0637	3.21234e+07	17.1717	2.62025e+06	3.97189e+06	6.84906e+06	36.8408	56.0654	3.92043	5.94276	10.2476	1.14884e+06	1.45847e+06	1.66898e+06	2.25607e+06	16.2614	20.4081	23.3204	31.8857	189072	4.47872e+06	113873	1.77522e+06	94102.9	2.4781	62.641	1.50596
Lower quartile	UN Subregion	South-eastern Asia	6.68357e+08	0.194741	1.88584e+08	0.77304	2.31857e+07	0.0950425	78.1273	77.1246	0.593327	21.1591	0.526662	23.242	43.7191	0.573333	0.660316	8.48074	1.98935	97.2721	34.457	64.9832	33.0723	3.48557e+07	18.4107	2.91435e+06	4.29039e+06	7.24094e+06	39.9556	58.8207	4.36047	6.41931	10.8339	1.28267e+06	1.63013e+06	1.82064e+06	2.46772e+06	17.5452	22.337	24.9171	33.7826	196477	4.80054e+06	123188	1.97516e+06	106352	2.65877	65.9327	1.67044
Median	UN Subregion	South-eastern Asia	6.68357e+08	0.194741	1.89541e+08	0.776964	2.34552e+07	0.0961475	78.4132	77.4086	0.597248	21.4581	0.534477	23.4374	44.0306	0.589419	0.66363	8.67009	2.31002	97.69	34.7365	65.2635	33.3133	3.53706e+07	18.6616	2.97949e+06	4.36641e+06	7.35305e+06	40.5475	59.4525	4.45793	6.53304	11.0017	1.31137e+06	1.66848e+06	1.85446e+06	2.51246e+06	17.8467	22.7048	25.2455	34.1912	198090	4.88965e+06	125354	2.02765e+06	109238	2.69338	66.5399	1.70475
Upper quartile	UN Subregion	South-eastern Asia	6.68357e+08	0.194741	1.90492e+08	0.780863	2.37082e+07	0.0971845	78.7146	77.7115	0.601067	21.7413	0.542554	23.6299	44.3479	0.612577	0.666998	8.87886	2.72793	98.0106	35.0168	65.543	33.5671	3.58937e+07	18.9136	3.05118e+06	4.45036e+06	7.46469e+06	41.1793	60.0444	4.5652	6.65865	11.1687	1.34295e+06	1.70989e+06	1.8923e+06	2.56046e+06	18.1474	23.0989	25.5512	34.5986	199751	4.98347e+06	127678	2.07982e+06	112097	2.72888	67.123	1.73822
Max	UN Subregion	South-eastern Asia	6.68357e+08	0.194741	1.95104e+08	0.799768	2.50785e+07	0.102801	79.9062	78.9171	0.619244	23.009	0.580637	24.4443	46.1179	0.785972	0.681749	9.97393	6.40487	98.7178	36.2243	66.8566	34.6498	3.84016e+07	19.9751	3.38845e+06	4.84514e+06	8.05572e+06	43.9346	63.1592	5.06982	7.24932	12.053	1.48227e+06	1.92558e+06	2.04916e+06	2.81203e+06	19.6305	24.9606	27.058	36.6156	208680	5.48153e+06	140482	2.33306e+06	125362	2.89392	69.4573	1.91496
Mean	UN Subregion	Southern Asia	1.96931e+09	0.177256	4.12162e+08	0.573404	4.12323e+07	0.0573628	77.0718	75.9451	0.67863	22.7726	0.603697	2.20056	59.7777	2.07297	0	11.8938	0.442538	99.5575	3.55056	96.4494	16.0757	8.75964e+07	21.2529	6.29164e+06	8.8819e+06	1.51735e+07	41.4664	58.5336	3.19485	4.51016	7.705	2.77798e+06	3.51366e+06	3.73323e+06	5.14868e+06	18.3091	23.1573	24.6029	33.9307	489493	9.19655e+06	248920	4.86093e+06	377653	3.2272	60.6079	1.64103
Min	UN Subregion	Southern Asia	1.96931e+09	0.177256	4.01542e+08	0.558629	3.83055e+07	0.0532911	75.4497	74.3392	0.659266	21.2245	0.571678	1.8811	57.7066	1.64657	0	10.8956	0.289704	99.1938	3.08886	96.0059	15.0619	8.14981e+07	19.8508	5.73671e+06	8.10831e+06	1.40221e+07	37.428	55.4567	2.91305	4.11733	7.12029	2.51045e+06	3.18914e+06	3.39867e+06	4.63854e+06	16.5089	20.9192	22.9335	31.6654	470225	8.34309e+06	228495	4.23508e+06	334003	2.99312	56.8721	1.48636
Lower quartile	UN Subregion	Southern Asia	1.96931e+09	0.177256	4.10125e+08	0.570571	4.0796e+07	0.0567558	76.7967	75.672	0.674895	22.5063	0.597717	2.14084	59.4861	1.97513	0	11.7097	0.386723	99.5133	3.45441	96.3538	15.8738	8.63578e+07	20.9744	6.16065e+06	8.71384e+06	1.49508e+07	40.8582	57.9155	3.12833	4.42482	7.59192	2.71781e+06	3.43524e+06	3.6567e+06	5.04412e+06	18.0069	22.7807	24.2882	33.4979	485947	9.0235e+06	245094	4.736e+06	368694	3.18459	60.0185	1.61248
Median	UN Subregion	Southern Asia	1.96931e+09	0.177256	4.12128e+08	0.573356	4.12278e+07	0.0573565	77.0787	75.9509	0.678616	22.7656	0.603605	2.20173	59.7839	2.06643	0	11.8894	0.431869	99.5681	3.55335	96.4466	16.0696	8.7553e+07	21.2435	6.28456e+06	8.87446e+06	1.5164e+07	41.4397	58.5603	3.19125	4.50638	7.70013	2.77397e+06	3.51037e+06	3.72639e+06	5.14168e+06	18.2965	23.1435	24.5931	33.9308	489415	9.19505e+06	248779	4.85203e+06	377321	3.22834	60.6206	1.64054
Upper quartile	UN Subregion	Southern Asia	1.96931e+09	0.177256	4.14157e+08	0.57618	4.16727e+07	0.0579755	77.3406	76.2104	0.682259	23.0449	0.609663	2.25982	60.0763	2.16261	0	12.0696	0.486703	99.6133	3.64616	96.5456	16.2691	8.88013e+07	21.5274	6.41514e+06	9.03684e+06	1.53923e+07	42.0845	59.1418	3.25756	4.58884	7.81609	2.83345e+06	3.58628e+06	3.80238e+06	5.24426e+06	18.604	23.5346	24.9035	34.348	492998	9.36048e+06	252631	4.97283e+06	386339	3.26991	61.1993	1.66827
Max	UN Subregion	Southern Asia	1.96931e+09	0.177256	4.22294e+08	0.5875	4.36528e+07	0.0607302	78.6335	77.4945	0.696965	24.3799	0.640371	2.48559	61.382	2.62053	0	13.1003	0.806196	99.7103	3.99411	96.9111	17.3941	9.41741e+07	22.6871	7.04142e+06	1.00614e+07	1.64384e+07	44.5433	62.572	3.57557	5.10909	8.3473	3.16285e+06	3.97638e+06	4.22208e+06	5.84411e+06	20.1171	25.2107	26.6958	36.3461	510144	1.02419e+07	269509	5.62522e+06	423820	3.45446	63.6861	1.78858
Mean	UN Subregion	Southern Europe	1.50725e+08	0.256241	7.85528e+07	1.42785	9.97584e+06	0.18133	98.3092	98.0945	0.102969	1.68909	0.1134	73.2025	3.27731	0.911401	2.34248	18.3609	96.9627	3.03731	95.714	4.28605	94.8155	1.41113e+06	1.79687	75729.3	168579	244309	31.2075	68.7925	0.502432	1.11845	1.62089	38967.4	36761.9	75109	93470.4	16.0587	15.1489	30.6505	38.142	14153.3	153028	11311.9	64448.4	1367.2	5.83703	63.0415	4.66458
Min	UN Subregion	Southern Europe	1.50725e+08	0.256241	7.34398e+07	1.33491	8.94099e+06	0.16252	98.085	97.8731	0.0966092	1.48191	0.101242	69.5468	2.94056	0.863738	1.51399	14.7338	95.293	2.16775	95.0609	3.75285	94.2722	1.08832e+06	1.39075	62801.8	118601	192007	21.3581	60.6977	0.416664	0.786865	1.27389	32892	29579.2	53814.6	64785.9	11.1357	10.2224	26.5217	33.3553	13264	131381	9741.55	24110.4	1071.2	4.27347	45.1549	3.37947
Lower quartile	UN Subregion	Southern Europe	1.50725e+08	0.256241	7.76282e+07	1.41104	9.78822e+06	0.17792	98.2689	98.0529	0.101631	1.6465	0.110759	72.4849	3.20479	0.900608	2.08287	17.686	96.7515	2.78196	95.6121	4.17846	94.7216	1.30365e+06	1.66175	72538.4	152646	228218	29.1509	66.7163	0.481262	1.01274	1.51413	37526.1	34955.6	67920.9	84539.3	15.0652	14.091	29.5443	36.8468	13963.8	148742	10990.7	48884.6	1287.66	5.49674	59.5302	4.37128
Median	UN Subregion	Southern Europe	1.50725e+08	0.256241	7.8539e+07	1.4276	9.97423e+06	0.181301	98.311	98.0957	0.102889	1.68725	0.113325	73.2106	3.27412	0.911425	2.30941	18.3467	97.0002	2.99981	95.7149	4.28513	94.8209	1.38942e+06	1.77233	75703.5	165193	241141	31.2957	68.7043	0.502261	1.09599	1.59987	38913.2	36734	73648.4	91661.6	16.1118	15.1681	30.5459	38.0067	14147.9	152810	11300.6	60675.4	1357.89	5.86698	63.6077	4.6762
Upper quartile	UN Subregion	Southern Europe	1.50725e+08	0.256241	7.9475e+07	1.44461	1.01571e+07	0.184625	98.3518	98.1381	0.104309	1.72933	0.115891	73.9198	3.34843	0.921967	2.56705	19.0126	97.218	3.24846	95.8215	4.3879	94.9129	1.49714e+06	1.9084	78867.3	181650	257262	33.2837	70.8491	0.523252	1.20517	1.70682	40378.7	38528.7	80942.5	100663	17.0835	16.2119	31.637	39.3037	14333.6	157043	11623.5	76995.9	1434.3	6.19682	66.9201	4.95732
Max	UN Subregion	Southern Europe	1.50725e+08	0.256241	8.28349e+07	1.50568	1.10185e+07	0.200283	98.5166	98.3032	0.110242	1.91306	0.127772	76.8104	3.73954	0.974242	3.69557	21.9475	97.8322	4.707	96.2471	4.93913	95.281	1.99685e+06	2.54225	90012.3	252799	327625	39.3023	78.6419	0.597194	1.67722	2.17366	46795.4	45628.5	118019	146406	20.06	19.66	38.0248	46.0325	15249.1	180278	13456.6	150454	1935.47	7.31765	76.1883	6.15951
Mean	UN Subregion	Sub-Saharan Africa	1.109e+09	0.246452	2.28887e+08	0.565451	2.17711e+07	0.0537843	49.3851	48.3052	1.22194	49.9964	0.476459	4.12408	36.0918	0.136653	0.079562	7.87316	0.912768	99.0872	10.2559	89.7441	12.0678	5.8266e+07	25.4563	7.57077e+06	6.02762e+06	1.35984e+07	55.6781	44.3219	6.82664	5.43517	12.2618	3.3339e+06	4.23687e+06	2.5464e+06	3.48122e+06	24.5189	31.1592	18.7241	25.5978	489407	1.09945e+07	103734	1.6774e+06	333338	3.6	80.8536	0.763004
Min	UN Subregion	Sub-Saharan Africa	1.109e+09	0.246452	2.21946e+08	0.548303	1.99806e+07	0.0493608	47.1967	46.1391	1.1805	47.6262	0.442376	3.52608	33.8	0.115028	0.0775994	7.21515	0.656632	98.4232	8.80413	88.5569	11.1601	5.38496e+07	23.6002	6.89581e+06	5.29961e+06	1.26993e+07	50.8772	40.2482	6.21802	4.77871	11.4511	3.05069e+06	3.82733e+06	2.23046e+06	3.02551e+06	22.8241	28.0531	17.0843	22.9987	469463	1.02327e+07	93431.8	1.34574e+06	304579	3.34405	77.1834	0.686748
Lower quartile	UN Subregion	Sub-Saharan Africa	1.109e+09	0.246452	2.2774e+08	0.562618	2.14399e+07	0.0529661	48.9718	47.8951	1.21315	49.6016	0.468736	4.01368	35.6892	0.134446	0.0791464	7.70938	0.806926	99.0056	9.97609	89.4659	11.8795	5.74069e+07	25.1125	7.42208e+06	5.86866e+06	1.34252e+07	54.7273	43.3857	6.69257	5.29183	12.1056	3.27556e+06	4.14111e+06	2.48529e+06	3.38184e+06	24.1464	30.529	18.3783	24.9564	485357	1.08451e+07	101291	1.59041e+06	327447	3.55547	80.3632	0.74528
Median	UN Subregion	Sub-Saharan Africa	1.109e+09	0.246452	2.2891e+08	0.565508	2.17498e+07	0.0537316	49.3686	48.2905	1.22165	50.0135	0.475891	4.12431	36.0877	0.13734	0.0795494	7.86533	0.89061	99.1094	10.2616	89.7384	12.0616	5.8269e+07	25.4545	7.56952e+06	6.03036e+06	1.35946e+07	55.6556	44.3444	6.82551	5.43763	12.2584	3.33141e+06	4.23778e+06	2.54608e+06	3.48203e+06	24.5144	31.1472	18.7302	25.5955	489279	1.09922e+07	103496	1.6687e+06	332941	3.5979	80.9183	0.761381
Upper quartile	UN Subregion	Sub-Saharan Africa	1.109e+09	0.246452	2.30076e+08	0.568388	2.20852e+07	0.05456	49.7875	48.7015	1.23043	50.4014	0.483791	4.24102	36.4842	0.140186	0.0799581	8.01976	0.994419	99.1931	10.5341	90.0239	12.245	5.91296e+07	25.8076	7.71566e+06	6.18178e+06	1.37694e+07	56.6143	45.2727	6.95729	5.57418	12.416	3.39069e+06	4.33072e+06	2.60841e+06	3.57876e+06	24.8794	31.7761	19.0768	26.2269	493417	1.11409e+07	105897	1.75072e+06	338840	3.64477	81.3991	0.779425
Max	UN Subregion	Sub-Saharan Africa	1.109e+09	0.246452	2.34663e+08	0.57972	2.40693e+07	0.0594616	51.8049	50.6998	1.27302	52.1333	0.519479	4.5853	38.4704	0.157454	0.0820457	8.92474	1.5768	99.3434	11.4431	91.1959	13.1634	6.30525e+07	27.5073	8.30024e+06	6.97656e+06	1.44887e+07	59.7518	49.1228	7.48441	6.29084	13.0646	3.64772e+06	4.67343e+06	2.98452e+06	4.00151e+06	26.1866	33.7835	21.0143	28.1085	510675	1.1779e+07	123319	2.27606e+06	365276	3.84369	82.9937	0.926668
Mean	UN Subregion	Western Asia	2.85991e+08	0.149313	1.17316e+08	1.12387	1.39662e+07	0.133793	88.8919	88.4042	0.239841	11.0814	0.274592	54.3756	25.1666	0.307164	0.251966	8.30282	35.8418	64.1582	68.3625	31.6375	63.2203	1.31743e+07	11.2306	742611	1.57613e+06	2.31874e+06	32.0607	67.9393	2.59663	5.51114	8.10777	334737	407874	707796	868338	14.4525	17.6082	30.497	37.4424	49235.4	1.52335e+06	38340.8	687500	20315.9	2.13107	65.7536	1.65881
Min	UN Subregion	Western Asia	2.85991e+08	0.149313	1.09413e+08	1.04816	1.19301e+07	0.114287	86.5264	86.0682	0.22076	8.78345	0.233401	50.3062	21.8247	0.25348	0.0845576	6.30408	23.6747	48.9993	64.1426	27.7544	59.8612	1.071e+07	9.19358	586391	1.23518e+06	1.87406e+06	23.6855	59.1932	2.05039	4.31895	6.55287	263736	315735	543458	688190	10.6548	13.0308	26.2802	32.0558	44648.9	1.19936e+06	30674	455363	14901.6	1.62708	50.0077	1.20734
Lower quartile	UN Subregion	Western Asia	2.85991e+08	0.149313	1.15758e+08	1.10894	1.35456e+07	0.129764	88.4922	88.0061	0.235823	10.6533	0.265793	53.7012	24.4491	0.288537	0.190236	7.86281	32.9779	61.4836	67.5912	30.8105	62.5842	1.26455e+07	10.7822	702690	1.48921e+06	2.21167e+06	30.7741	66.6829	2.45704	5.20721	7.73337	317052	384960	662966	822618	13.8686	16.8185	29.6083	36.7062	48342.2	1.45149e+06	36787.5	617533	19014.4	2.04706	63.9058	1.5707
Median	UN Subregion	Western Asia	2.85991e+08	0.149313	1.17337e+08	1.12406	1.39578e+07	0.133712	88.9048	88.414	0.239597	11.0689	0.274293	54.3955	25.1134	0.301809	0.235385	8.2593	35.6711	64.3289	68.419	31.581	63.2482	1.31432e+07	11.2106	739522	1.56808e+06	2.30847e+06	32.0326	67.9674	2.58583	5.48298	8.07182	333308	406069	701478	864645	14.4392	17.58	30.3989	37.4485	49214.1	1.51969e+06	38213.7	675535	20170.8	2.13334	65.971	1.65465
Upper quartile	UN Subregion	Western Asia	2.85991e+08	0.149313	1.18826e+08	1.13832	1.43663e+07	0.137626	89.3208	88.8334	0.243716	11.4801	0.28291	55.0812	25.8554	0.320431	0.299617	8.7136	38.5164	67.0221	69.1895	32.4088	63.8943	1.3651e+07	11.6479	778648	1.6499e+06	2.41501e+06	33.3171	69.2259	2.72264	5.76907	8.44437	350688	428220	743553	907855	15.0106	18.3519	31.251	38.1744	50069.7	1.59264e+06	39842.1	742376	21421.1	2.21784	67.8197	1.74176
Max	UN Subregion	Western Asia	2.85991e+08	0.149313	1.25354e+08	1.20087	1.62026e+07	0.155217	91.1967	90.7159	0.265714	13.4401	0.320729	57.2532	28.6461	0.443446	0.501387	10.9935	51.0007	76.3253	72.2456	35.8574	66.1532	1.66563e+07	13.9468	1.07148e+06	2.18678e+06	2.99528e+06	40.8068	76.3145	3.74657	7.64635	10.4733	464867	606615	1.10822e+06	1.15635e+06	18.923	23.1026	38.8709	41.6018	54477.2	1.96172e+06	49828.9	1.33666e+06	28898.9	2.62977	74.2971	2.17118
Mean	UN Subregion	Western Europe	1.95039e+08	0.291076	9.47328e+07	1.33072	1.099e+07	0.154377	100	99.851	0.0802537	0	0.0687248	40.498	0	5.26365	31.4127	22.6766	99.6365	0.363456	100	0	99.851	0	0	20858	0	20858	100	0	0.106943	0	0.106943	14344.3	6513.76	0	0	68.7718	31.2282	0	0	13305	0	7553.09	0	0	63.7954	0	36.2046
Min	UN Subregion	Western Europe	1.95039e+08	0.291076	9.01145e+07	1.26585	9.9353e+06	0.139562	100	99.8408	0.0756692	0	0.0630125	35.3938	0	3.99713	26.2244	20.7181	99.5814	0.31931	100	0	99.8408	0	0	19182.6	0	19182.6	100	0	0.098353	0	0.098353	13205.3	5977.35	0	0	68.1061	30.4432	0	0	12397	0	6605.81	0	0	60.8865	0	33.8968
Lower quartile	UN Subregion	Western Europe	1.95039e+08	0.291076	9.38807e+07	1.31875	1.07949e+07	0.151636	100	99.8493	0.0793674	0	0.0675488	39.5242	0	5.00339	30.4906	22.2968	99.6275	0.354261	100	0	99.8493	0	0	20514.4	0	20514.4	100	0	0.105181	0	0.105181	14112.5	6395.52	0	0	68.6432	31.0983	0	0	13104.2	0	7359.38	0	0	63.332	0	35.7242
Median	UN Subregion	Western Europe	1.95039e+08	0.291076	9.47203e+07	1.33054	1.09852e+07	0.154309	100	99.8511	0.0802201	0	0.0686829	40.4803	0	5.26185	31.3966	22.6804	99.6366	0.363409	100	0	99.8511	0	0	20850.2	0	20850.2	100	0	0.106903	0	0.106903	14339.5	6508.16	0	0	68.7767	31.2233	0	0	13300.3	0	7545.14	0	0	63.8044	0	36.1956
Upper quartile	UN Subregion	Western Europe	1.95039e+08	0.291076	9.55767e+07	1.34257	1.11718e+07	0.156931	100	99.8529	0.0811078	0	0.0698665	41.5202	0	5.50707	32.3204	23.0699	99.6457	0.372521	100	0	99.8529	0	0	21188.1	0	21188.1	100	0	0.108635	0	0.108635	14565.8	6623.7	0	0	68.9017	31.3568	0	0	13497.1	0	7735.29	0	0	64.2758	0	36.668
Max	UN Subregion	Western Europe	1.95039e+08	0.291076	9.91106e+07	1.39221	1.21098e+07	0.170107	100	99.8612	0.0857424	0	0.0750974	45.2206	0	6.93413	36.1548	24.9488	99.6807	0.418561	100	0	99.8612	0	0	22899.6	0	22899.6	100	0	0.117411	0	0.117411	15725	7206.14	0	0	69.5568	31.8939	0	0	14645.8	0	8681.2	0	0	66.1032	0	39.1135
Mean	UN Intermediate region	Caribbean	4.39122e+07	0.246881	1.62586e+07	1.01439	1.85713e+06	0.115868	80.605	79.8677	0.529615	19.2922	0.310491	64.2353	8.03141	0.0618944	0	7.53913	25.3852	74.6148	88.8887	11.1113	71.7927	1.69187e+06	10.4075	226458	198066	424525	53.3309	46.6691	5.15708	4.51051	9.66759	102577	123882	86856.4	111210	24.1599	29.1711	20.4654	26.2037	15064.6	367291	5766.24	29320.6	7081.71	3.55442	86.5185	1.36142
Min	UN Intermediate region	Caribbean	4.39122e+07	0.246881	1.50233e+07	0.937319	1.58541e+06	0.0989157	77.7051	76.9293	0.45872	16.4515	0.251806	60.9698	6.33425	0.0255958	0	5.93159	14.5608	61.1022	85.9164	8.64261	69.1301	1.36142e+06	8.56326	166867	150930	347549	43.0937	38.5083	3.80001	3.43709	7.91463	74177.8	85465.6	66325.7	83945.9	19.6107	21.959	16.5132	21.3976	12732.9	288007	4456.2	10885.2	4229.02	3.03204	77.3094	1.04579
Lower quartile	UN Intermediate region	Caribbean	4.39122e+07	0.246881	1.60117e+07	0.998989	1.80122e+06	0.11238	80.0657	79.3231	0.513643	18.762	0.297897	63.6376	7.59423	0.0529579	0	7.14563	22.9695	72.3595	88.3646	10.5432	71.2684	1.6167e+06	9.95105	214251	186844	408121	51.3393	44.7053	4.87908	4.25494	9.29404	96259.7	115985	81494.4	104492	22.987	27.7661	19.4754	24.9486	14568.1	351784	5464.44	23451.5	6388.46	3.43668	85.4219	1.28307
Median	UN Intermediate region	Caribbean	4.39122e+07	0.246881	1.62498e+07	1.01384	1.85435e+06	0.115695	80.629	79.8934	0.529258	19.2671	0.30957	64.2254	7.99141	0.0606776	0	7.5177	25.2691	74.7309	88.9424	11.0576	71.797	1.69144e+06	10.3991	225659	198064	423676	53.3507	46.6493	5.13888	4.51047	9.64827	102153	123287	86623.7	111093	24.1004	29.0858	20.3975	26.1291	15043.8	366848	5739.67	28216.1	6988.46	3.54978	86.6696	1.35461
Upper quartile	UN Intermediate region	Caribbean	4.39122e+07	0.246881	1.64949e+07	1.02913	1.9119e+06	0.119285	81.1411	80.4136	0.544604	19.8264	0.322256	64.8427	8.4278	0.069585	0	7.89968	27.6405	77.0305	89.4568	11.6354	72.3412	1.76193e+06	10.8262	238173	208705	440400	55.2947	48.6607	5.42384	4.75277	10.0291	108397	131341	91758.5	117592	25.2301	30.4913	21.3868	27.3647	15544.7	381553	6032.97	34299.3	7673.13	3.6678	87.7566	1.43168
Max	UN Intermediate region	Caribbean	4.39122e+07	0.246881	1.76806e+07	1.10311	2.20028e+06	0.137278	83.4713	82.7832	0.625915	22.1553	0.386286	67.7954	10.1935	0.128903	0	9.82734	38.8978	85.4392	91.3574	14.0836	74.8695	2.17395e+06	13.1662	295062	260794	523837	61.4917	56.9063	6.71936	5.93899	11.9292	142339	177772	112187	148607	30.2279	36.0671	26.6102	32.2917	17629.3	468524	7655.4	65336	11373.4	4.22518	90.7916	1.85092
Mean	UN Intermediate region	Central America	1.76219e+08	0.175019	6.54337e+07	1.01731	7.40794e+06	0.115173	82.8451	82.1408	0.411778	17.0843	0.363165	64.628	8.75902	0.778406	0	7.97536	12.942	87.058	88.0644	11.9356	73.3556	7.84154e+06	11.9845	568819	860597	1.42942e+06	39.7981	60.2019	3.2279	4.88366	8.11157	259704	309116	375542	485055	18.1707	21.6274	26.2706	33.9313	47151.2	1.21194e+06	26903.7	126297	17125.9	3.30005	84.7891	1.88287
Min	UN Intermediate region	Central America	1.76219e+08	0.175019	6.2645e+07	0.973957	6.90835e+06	0.107406	81.6832	80.9452	0.393161	16.0676	0.332551	63.0178	8.11952	0.741652	0	6.88333	10.5442	84.5374	87.0185	11.0502	72.06	7.20202e+06	11.0838	514158	776037	1.30377e+06	36.3479	56.5617	2.91771	4.40381	7.39855	232805	273894	339116	435367	16.5443	19.5059	24.7096	31.7694	45181.2	1.11594e+06	24028.4	88618.5	15001.9	3.05939	80.9953	1.67583
Lower quartile	UN Intermediate region	Central America	1.76219e+08	0.175019	6.49214e+07	1.00935	7.316e+06	0.113744	82.6344	81.9318	0.408407	16.8775	0.357159	64.3186	8.62312	0.768172	0	7.72824	12.4958	86.6036	87.8819	11.7494	73.1189	7.70731e+06	11.7856	556266	841702	1.40552e+06	39.0897	59.4642	3.15666	4.77644	7.97596	253693	301619	366681	473704	17.8335	21.179	25.8901	33.4524	46730.5	1.19074e+06	26318.6	115447	16646.5	3.25199	84.1977	1.83814
Median	UN Intermediate region	Central America	1.76219e+08	0.175019	6.54293e+07	1.01724	7.40721e+06	0.115162	82.8535	82.1509	0.411821	17.076	0.362876	64.6334	8.75846	0.776442	0	7.95422	12.9322	87.0678	88.0675	11.9325	73.3643	7.83944e+06	11.9761	568572	859523	1.42746e+06	39.8048	60.1952	3.2265	4.87757	8.10045	259494	308842	374833	484327	18.16	21.6191	26.2526	33.8923	47135.9	1.21072e+06	26866.7	124714	17086.5	3.30081	84.87	1.88024
Upper quartile	UN Intermediate region	Central America	1.76219e+08	0.175019	6.59359e+07	1.02512	7.49955e+06	0.116597	83.0531	82.3501	0.415027	17.2942	0.368763	64.9401	8.8885	0.785956	0	8.19625	13.3964	87.5042	88.2506	12.1181	73.5902	7.96852e+06	12.1772	580806	878767	1.45213e+06	40.5358	60.9103	3.29593	4.98678	8.24048	265301	316302	383733	495511	18.4984	22.0674	26.6261	34.3766	47572.6	1.23232e+06	27469.1	135686	17557.8	3.34741	85.4588	1.92602
Max	UN Intermediate region	Central America	1.76219e+08	0.175019	6.81805e+07	1.06002	7.96898e+06	0.123896	83.8674	83.1639	0.430156	18.239	0.400973	66.125	9.5485	0.860599	0	9.51832	15.4626	89.4558	88.9498	12.9815	74.5802	8.54086e+06	12.9997	636442	971432	1.55406e+06	43.4383	63.6521	3.61164	5.51262	8.81887	291357	348342	427078	548796	20.1279	23.8946	28.2952	36.5548	49562.9	1.31703e+06	31263	194209	20092	3.54059	87.3661	2.13086
Mean	UN Intermediate region	Channel Islands	170482	0.0885702	79065.1	1.27061	9571.86	0.153824	100	99.8465	0.0713677	0	0.0821101	81.4693	0	0.0066755	0	18.3706	99.2967	0.70327	100	0	99.8465	0	0	17.7116	0	17.7116	100	0	0.103891	0	0.103891	12.0201	5.69152	0	0	67.9661	32.0339	0	0	9.86001	0	7.85156	0	0	56.4655	0	43.5345
Min	UN Intermediate region	Channel Islands	170482	0.0885702	49609.3	0.797244	4205.77	0.0675886	100	99.6819	0.0374593	0	0.0345948	60.7874	0	0	0	3.3047	96.7702	0.161735	100	0	99.6819	0	0	8.7408	0	8.7408	100	0	0.051271	0	0.051271	5.81445	2.66634	0	0	53.9415	25.0749	0	0	5.24501	0	2.67803	0	0	27.3319	0	22.0035
Lower quartile	UN Intermediate region	Channel Islands	170482	0.0885702	70627.5	1.13501	7882.94	0.126682	100	99.8299	0.0635227	0	0.0675432	77.5545	0	0	0	14.105	99.1556	0.482927	100	0	99.8299	0	0	14.578	0	14.578	100	0	0.0855106	0	0.0855106	9.93717	4.60512	0	0	66.7909	30.6936	0	0	8.37173	0	5.86044	0	0	52.2221	0	39.0301
Median	UN Intermediate region	Channel Islands	170482	0.0885702	77209.3	1.24079	9163.76	0.147266	100	99.8497	0.0704224	0	0.0796536	82.0742	0	0	0	17.7631	99.3679	0.632107	100	0	99.8497	0	0	16.9337	0	16.9337	100	0	0.0993279	0	0.0993279	11.5036	5.38511	0	0	68.1186	31.8814	0	0	9.5149	0	7.22418	0	0	56.7708	0	43.2292
Upper quartile	UN Intermediate region	Channel Islands	170482	0.0885702	86539	1.39072	10797.2	0.173515	100	99.8667	0.0782267	0	0.093703	85.757	0	0	0	22.2811	99.5171	0.844406	100	0	99.8667	0	0	19.8682	0	19.8682	100	0	0.116541	0	0.116541	13.4755	6.392	0	0	69.3064	33.2091	0	0	11.0604	0	9.09327	0	0	60.9699	0	47.7779
Max	UN Intermediate region	Channel Islands	170482	0.0885702	118594	1.90585	25001.8	0.40179	100	99.922	0.131583	0	0.212052	96.5274	0	0.359316	0	39.0562	99.8383	3.22979	100	0	99.922	0	0	54.6358	0	54.6358	100	0	0.320478	0	0.320478	35.0185	19.6173	0	0	74.9251	46.0585	0	0	21.7003	0	39.7028	0	0	77.9965	0	72.6681
Mean	UN Intermediate region	Eastern Africa	4.49173e+08	0.279295	7.9088e+07	0.482397	6.89822e+06	0.0420757	43.328	42.0159	1.61401	55.7573	0.612785	1.32403	33.4457	0.0819359	0.23027	6.93398	0.667317	99.3327	3.80825	96.1918	8.38396	1.88104e+07	23.7841	2.85483e+06	1.62376e+06	4.47858e+06	63.7458	36.2542	6.35574	3.615	9.97074	1.29051e+06	1.56432e+06	700889	922870	28.8167	34.929	15.6491	20.6051	223369	3.61826e+06	42274.5	447383	147303	4.98921	80.7872	0.944129
Min	UN Intermediate region	Eastern Africa	4.49173e+08	0.279295	7.56672e+07	0.461532	6.20702e+06	0.0378597	41.4877	40.1878	1.56251	53.9325	0.550697	1.02316	31.652	0.0763554	0.221385	6.16395	0.00264103	97.2871	2.964	94.9329	7.51108	1.70772e+07	21.8364	2.62202e+06	1.4422e+06	4.15728e+06	60.8627	33.4076	5.83744	3.21079	9.25541	1.17445e+06	1.42451e+06	609336	820603	27.1458	32.9685	14.0206	18.8977	212471	3.31647e+06	35104.2	351508	130761	4.65372	78.6422	0.81592
Lower quartile	UN Intermediate region	Eastern Africa	4.49173e+08	0.279295	7.85157e+07	0.478906	6.7642e+06	0.0412582	42.9794	41.6772	1.60413	55.4204	0.598965	1.25618	33.1044	0.0808778	0.228635	6.75082	0.325106	99.0689	3.61887	96.0124	8.19707	1.84446e+07	23.3568	2.80449e+06	1.58332e+06	4.40906e+06	63.1238	35.6361	6.24367	3.52497	9.81596	1.2664e+06	1.53383e+06	682101	899375	28.4659	34.5304	15.3222	20.2317	221242	3.55478e+06	40994.2	428280	143469	4.92193	80.4103	0.915671
Median	UN Intermediate region	Eastern Africa	4.49173e+08	0.279295	7.90905e+07	0.482412	6.88872e+06	0.0420177	43.3184	42.0101	1.61366	55.7661	0.612712	1.31641	33.4335	0.0819037	0.230238	6.92766	0.591853	99.4081	3.79036	96.2096	8.37863	1.88033e+07	23.7677	2.85245e+06	1.62281e+06	4.47772e+06	63.7546	36.2454	6.35044	3.61289	9.96881	1.2893e+06	1.56366e+06	699969	922099	28.8117	34.9222	15.6443	20.595	223288	3.6155e+06	42206	446653	147082	4.9895	80.7965	0.942902
Upper quartile	UN Intermediate region	Eastern Africa	4.49173e+08	0.279295	7.96453e+07	0.485796	7.01805e+06	0.0428065	43.6754	42.3569	1.62369	56.0961	0.626237	1.38599	33.7673	0.0829361	0.231924	7.10377	0.931137	99.6749	3.98762	96.3811	8.55943	1.91768e+07	24.2194	2.90345e+06	1.66284e+06	4.5457e+06	64.3639	36.8762	6.464	3.70201	10.1202	1.31335e+06	1.59323e+06	719610	945825	29.1709	35.3143	15.9721	20.9733	225475	3.68015e+06	43477.3	465927	150898	5.05543	81.2032	0.970396
Max	UN Intermediate region	Eastern Africa	4.49173e+08	0.279295	8.22535e+07	0.501705	7.76423e+06	0.0473579	45.2114	43.8734	1.66617	57.5393	0.699537	1.76517	35.5477	0.0882886	0.240655	8.00231	2.71287	99.9974	5.06713	97.036	9.50035	2.08546e+07	25.9738	3.11055e+06	1.85261e+06	4.85298e+06	66.5924	39.1373	6.92505	4.12449	10.8043	1.42282e+06	1.74816e+06	804837	1.06028e+06	30.5458	37.28	17.4265	22.5008	235389	3.94498e+06	53119.6	548639	169051	5.30972	82.763	1.17117
Mean	UN Intermediate region	Middle Africa	1.84574e+08	0.273375	3.95444e+07	0.586978	3.51895e+06	0.0522337	44.9875	43.9349	1.29192	54.3007	0.472419	3.08517	33.039	0.00237924	0	7.80839	0.0644318	99.9356	8.58406	91.4159	10.7503	1.10865e+07	28.035	1.28332e+06	1.08258e+06	2.3659e+06	54.2535	45.7465	6.95286	5.8653	12.8182	572860	710457	466470	616110	24.2229	30.0306	19.7132	26.0334	89388.6	1.95491e+06	16628.6	247394	57575.8	3.79269	82.5655	0.705569
Min	UN Intermediate region	Middle Africa	1.84574e+08	0.273375	3.65719e+07	0.542856	2.53888e+06	0.0376859	35.5189	34.6189	1.1185	45.3548	0.346886	1.79509	23.8957	0	0	5.55491	0	99.1291	4.32206	86.9529	8.4767	8.70252e+06	22.2926	968597	783243	1.79278e+06	45.8269	36.7138	5.24775	4.24352	9.71307	436837	522213	333765	443632	20.4467	24.7298	14.8074	20.7413	75956.7	1.40853e+06	11619.3	145960	43744.1	3.02901	72.0377	0.480424
Lower quartile	UN Intermediate region	Middle Africa	1.84574e+08	0.273375	3.89155e+07	0.577644	3.33362e+06	0.0494827	43.0071	41.9883	1.2508	52.4235	0.442991	2.82897	31.143	0	0	7.2833	0.00525244	99.9312	7.75562	90.5818	10.1657	1.06165e+07	26.9214	1.20481e+06	1.01201e+06	2.2473e+06	52.5329	44.0684	6.52751	5.48296	12.1756	537630	664113	434509	575104	23.3298	28.9386	18.878	24.9984	86257.8	1.83389e+06	15247	214973	53770.6	3.60878	81.3694	0.640702
Median	UN Intermediate region	Middle Africa	1.84574e+08	0.273375	3.95265e+07	0.586712	3.5048e+06	0.0520236	44.916	43.8646	1.28872	54.3691	0.468045	3.10755	32.909	0	0	7.74142	0.0239988	99.976	8.56351	91.4365	10.6949	1.10934e+07	28.0507	1.27852e+06	1.08014e+06	2.36078e+06	54.2077	45.7923	6.92689	5.85205	12.7904	569818	706974	465022	613610	24.1715	29.9756	19.6989	26.0374	89206.6	1.95298e+06	16332.5	241021	56895.2	3.77532	82.8009	0.692356
Upper quartile	UN Intermediate region	Middle Africa	1.84574e+08	0.273375	4.01747e+07	0.596334	3.68259e+06	0.0546626	46.9001	45.8129	1.33136	56.2465	0.495792	3.35369	34.8709	0.00244379	0	8.26397	0.0688224	99.9947	9.4182	92.2444	11.2578	1.15659e+07	29.1686	1.35348e+06	1.14824e+06	2.48044e+06	55.9316	47.4671	7.33302	6.22102	13.4388	603855	751116	495543	655126	25.0651	31.0681	20.5355	27.0616	92331.2	2.07025e+06	17629.2	273660	60626.9	3.96235	84.0582	0.757236
Max	UN Intermediate region	Middle Africa	1.84574e+08	0.273375	4.30374e+07	0.638827	5.01999e+06	0.0745144	54.1321	52.9744	1.48422	63.566	0.658257	4.45792	41.4054	0.0569189	0	11.2145	0.870948	100	13.0471	95.6779	14.139	1.36792e+07	33.7207	1.76161e+06	1.43046e+06	2.97698e+06	63.2862	54.1731	9.54421	7.75005	16.1289	766471	1.03618e+06	643372	824540	29.5811	37.0435	24.194	31.4463	104151	2.55298e+06	32193.5	515016	82519.3	4.87657	88.4893	1.50746
Mean	UN Intermediate region	NA	6.07383e+09	0.19324	1.86293e+09	0.840315	2.06551e+08	0.0931689	89.1644	88.4892	0.35669	10.7969	0.357164	34.9431	26.1971	1.41716	10.98	14.9518	53.5058	46.4942	57.1522	42.8478	62.2579	1.92006e+08	10.3068	1.32461e+07	2.08831e+07	3.41292e+07	38.8123	61.1877	2.18085	3.43822	5.61906	5.93984e+06	7.30627e+06	8.93647e+06	1.19467e+07	17.4044	21.4079	26.1839	35.0038	1.16288e+06	2.13354e+07	737718	1.02564e+07	636833	3.40775	62.5139	2.16181
Min	UN Intermediate region	NA	6.07383e+09	0.19324	1.83237e+09	0.826528	2.0027e+08	0.0903358	88.686	88.0054	0.349688	10.3798	0.346215	34.0631	25.5388	1.20281	10.3286	14.3906	51.1514	44.2844	56.2535	41.703	61.5753	1.8353e+08	9.85518	1.24953e+07	1.9694e+07	3.25679e+07	36.8417	59.4084	2.05723	3.24244	5.36201	5.58112e+06	6.86923e+06	8.38992e+06	1.12389e+07	16.5038	20.272	25.1927	33.867	1.13924e+06	2.0111e+07	708336	9.3299e+06	587869	3.2534	60.5697	2.04969
Lower quartile	UN Intermediate region	NA	6.07383e+09	0.19324	1.85681e+09	0.837552	2.05347e+08	0.0926258	89.0839	88.4083	0.355343	10.7149	0.355004	34.7767	26.0729	1.36763	10.8405	14.8325	53.0847	46.0754	56.9687	42.6631	62.1262	1.903e+08	10.2151	1.30874e+07	2.06604e+07	3.38396e+07	38.4535	60.8362	2.15471	3.40154	5.57137	5.86856e+06	7.21265e+06	8.83353e+06	1.18139e+07	17.2341	21.19	25.9997	34.7709	1.15831e+06	2.11132e+07	731938	1.00828e+07	626744	3.38158	62.1421	2.13976
Median	UN Intermediate region	NA	6.07383e+09	0.19324	1.863e+09	0.840342	2.06524e+08	0.0931571	89.1632	88.4876	0.356685	10.7983	0.357111	34.94	26.197	1.41342	10.98	14.9493	53.5032	46.4968	57.1562	42.8438	62.2571	1.91978e+08	10.3038	1.32434e+07	2.08678e+07	3.41191e+07	38.8075	61.1925	2.18041	3.43569	5.6174	5.93761e+06	7.30413e+06	8.929e+06	1.19386e+07	17.3987	21.4016	26.1792	35.0019	1.16266e+06	2.13302e+07	737590	1.02464e+07	636595	3.40826	62.529	2.16201
Upper quartile	UN Intermediate region	NA	6.07383e+09	0.19324	1.86898e+09	0.843042	2.07716e+08	0.0936947	89.2468	88.5722	0.358032	10.8771	0.359311	35.1057	26.3202	1.46217	11.1148	15.0652	53.9246	46.9153	57.3369	43.0313	62.393	1.9364e+08	10.3996	1.33955e+07	2.10961e+07	3.44231e+07	39.1638	61.5465	2.20544	3.47327	5.66745	6.0074e+06	7.39573e+06	9.03212e+06	1.20767e+07	17.566	21.6248	26.3616	35.2438	1.16741e+06	2.15486e+07	743383	1.04168e+07	646212	3.43443	62.8847	2.18345
Max	UN Intermediate region	NA	6.07383e+09	0.19324	1.89846e+09	0.856338	2.13639e+08	0.0963662	89.5835	88.9093	0.365477	11.2727	0.369016	35.8365	26.8541	1.77742	11.7048	15.6543	55.7156	48.8486	58.297	43.7465	62.9227	2.00203e+08	10.7746	1.41761e+07	2.2323e+07	3.61344e+07	40.5916	63.1583	2.33396	3.67528	5.9492	6.39507e+06	7.86932e+06	9.56079e+06	1.27623e+07	18.2755	22.495	27.3652	36.3247	1.18901e+06	2.27438e+07	776878	1.13016e+07	688643	3.54575	64.4836	2.29477
Mean	UN Intermediate region	South America	4.31195e+08	0.214821	1.58971e+08	1.01007	1.8538e+07	0.117787	87.6336	87.1191	0.275737	12.3323	0.272848	61.582	16.5123	0.212932	0	8.81184	16.984	83.016	78.8559	21.1441	70.5918	1.81801e+07	11.4364	877727	2.03622e+06	2.91395e+06	30.124	69.876	2.03557	4.72228	6.75785	409448	468278	905785	1.13044e+06	14.0528	16.0713	31.0834	38.7925	76709.9	2.16983e+06	50582.2	593001	23829.7	2.63383	74.469	1.73667
Min	UN Intermediate region	South America	4.31195e+08	0.214821	1.54369e+08	0.980829	1.74959e+07	0.111166	86.6093	86.092	0.266031	11.4601	0.255203	60.0369	15.6344	0.169471	0	7.57947	12.2809	77.6089	77.5456	20.1409	69.4822	1.69469e+07	10.5188	806478	1.82396e+06	2.63816e+06	27.7788	67.715	1.87033	4.23002	6.11825	376490	428119	815738	1.00823e+06	13.0923	14.6865	30.0613	37.4958	73846.7	1.98721e+06	46395.7	477531	22162.2	2.37076	70.0916	1.51011
Lower quartile	UN Intermediate region	South America	4.31195e+08	0.214821	1.58098e+08	1.00452	1.83499e+07	0.116592	87.4749	86.9627	0.273933	12.1712	0.269321	61.3159	16.3368	0.193641	0	8.57067	15.9512	82.0809	78.6439	20.923	70.3747	1.79257e+07	11.2751	860582	1.99814e+06	2.86613e+06	29.7216	69.4681	1.99581	4.63395	6.64695	401737	458623	888669	1.10901e+06	13.8645	15.8461	30.8771	38.5439	76185.1	2.13282e+06	49677	564912	23454.1	2.59406	73.7565	1.69982
Median	UN Intermediate region	South America	4.31195e+08	0.214821	1.58946e+08	1.00991	1.85295e+07	0.117733	87.6388	87.1256	0.27571	12.3268	0.272668	61.5876	16.5091	0.20335	0	8.79572	16.9038	83.0962	78.8608	21.1392	70.5936	1.81656e+07	11.4307	876626	2.03447e+06	2.91213e+06	30.1293	69.8707	2.03302	4.71822	6.75363	408975	467578	904958	1.12926e+06	14.0546	16.0673	31.0766	38.7859	76706.3	2.16815e+06	50513.6	590304	23821.4	2.6346	74.4961	1.73568
Upper quartile	UN Intermediate region	South America	4.31195e+08	0.214821	1.59814e+08	1.01543	1.87211e+07	0.11895	87.795	87.2809	0.277493	12.4906	0.276095	61.8529	16.6829	0.219006	0	9.0384	17.9191	84.0488	79.077	21.3561	70.8074	1.84217e+07	11.5908	893645	2.07062e+06	2.95901e+06	30.5319	70.2784	2.07249	4.80206	6.86235	416709	477286	921274	1.15013e+06	14.2383	16.3003	31.2911	39.0351	77227.1	2.20532e+06	51401	617886	24180.6	2.67502	75.2544	1.77176
Max	UN Intermediate region	South America	4.31195e+08	0.214821	1.6377e+08	1.04056	1.96883e+07	0.125096	88.5091	88.0114	0.285978	13.353	0.294567	62.947	17.6942	0.393745	0	10.4105	22.3911	87.7191	79.8591	22.4544	71.9757	1.99358e+07	12.4855	978187	2.27082e+06	3.22551e+06	32.285	72.2212	2.26855	5.26635	7.4804	456967	523265	1.01569e+06	1.26403e+06	15.1284	17.3419	32.5495	40.0714	79455.6	2.40087e+06	55834.5	765400	25972.6	2.86936	77.889	1.95596
Mean	UN Intermediate region	Southern Africa	6.72696e+07	0.218538	2.41098e+07	0.981934	2.79531e+06	0.113846	82.0946	81.5371	0.3744	17.8383	0.250176	26.1065	46.7688	0.770434	0	7.89134	6.71464	93.2854	35.8343	64.1657	34.7423	4.94688e+06	20.52	205957	585022	790978	26.2236	73.7764	3.06166	8.69668	11.7583	93828.9	112128	259577	325445	11.9485	14.2751	32.7331	41.0432	15782.9	495115	6992.23	266834	6253.75	2.02743	63.0283	0.896967
Min	UN Intermediate region	Southern Africa	6.72696e+07	0.218538	2.11189e+07	0.860122	2.2209e+06	0.0904519	74.4947	73.9466	0.326087	13.6247	0.197602	19.8471	39.7623	0.553772	0	5.03672	4.28994	89.8772	27.6759	56.937	28.6929	3.38683e+06	14.5545	137489	369177	536059	14.8885	61.5182	2.04386	5.48803	7.96882	62746	74743.4	162927	206250	6.82051	8.06797	27.058	34.2495	13665.9	341686	5398.96	109381	4577.73	1.19299	37.0213	0.530661
Lower quartile	UN Intermediate region	Southern Africa	6.72696e+07	0.218538	2.34435e+07	0.954798	2.66263e+06	0.108442	81.0602	80.4988	0.363646	16.6562	0.237824	25.0343	45.33	0.74083	0	7.21178	6.13839	92.7571	34.3193	62.7489	33.4503	4.50541e+06	18.8203	185575	517574	713916	24.1136	71.631	2.75867	7.69403	10.6128	84658.4	100708	229193	287933	10.99	13.0885	31.6463	39.7556	15337.1	450118	6513.9	206188	5867.33	1.85375	58.6868	0.805316
Median	UN Intermediate region	Southern Africa	6.72696e+07	0.218538	2.40885e+07	0.981066	2.78268e+06	0.113332	82.1913	81.633	0.373768	17.7411	0.248993	26.118	46.8161	0.777622	0	7.82849	6.69119	93.3088	35.778	64.222	34.7227	4.90832e+06	20.3516	202751	573074	780943	26.2442	73.7558	3.01401	8.51906	11.6092	92204.1	110309	253991	318822	11.9536	14.2647	32.6728	40.9883	15773.5	492557	6931.4	252455	6222.69	2.02265	63.5309	0.888193
Upper quartile	UN Intermediate region	Southern Africa	6.72696e+07	0.218538	2.47793e+07	1.0092	2.9193e+06	0.118896	83.2806	82.7165	0.385257	18.8676	0.261647	27.171	48.2765	0.809847	0	8.48173	7.24289	93.8616	37.2511	65.6807	35.981	5.321e+06	22.0691	223128	640931	853346	28.369	75.8864	3.31692	9.5278	12.6855	101375	121676	283966	356616	12.9249	15.4671	33.7155	42.2873	16196.8	534106	7405.69	312569	6601.93	2.19837	67.8039	0.981374
Max	UN Intermediate region	Southern Africa	6.72696e+07	0.218538	2.71279e+07	1.10485	3.6871e+06	0.150167	86.3264	85.7783	0.433083	25.4027	0.329785	31.3395	53.2248	0.922409	0	12.2793	10.1228	95.7101	43.063	72.3241	41.2175	7.28233e+06	30.1543	362081	1.05176e+06	1.26506e+06	38.4818	85.1115	5.38254	15.635	18.8059	167275	194806	476101	584111	17.0607	21.4212	39.1096	49.3411	18490.1	803084	10576.2	762517	9135.14	2.93638	80.882	1.50368
Mean	UN Intermediate region	Western Africa	4.07987e+08	0.188295	8.61448e+07	0.578482	9.08205e+06	0.060988	47.7073	46.7817	1.06714	51.7347	0.416524	1.02726	36.9231	0.0714615	0	8.75979	0.000176436	99.9998	2.70707	97.2929	9.71665	2.34222e+07	27.1895	3.22667e+06	2.73626e+06	5.96293e+06	54.1194	45.8806	7.90874	6.70673	14.6155	1.37671e+06	1.84996e+06	1.11947e+06	1.61679e+06	23.0908	31.0286	18.7717	27.109	160867	4.92623e+06	37838.7	715788	122206	2.69874	82.6239	0.634675
Min	UN Intermediate region	Western Africa	4.07987e+08	0.188295	8.35792e+07	0.561253	8.13513e+06	0.0546292	46.3568	45.4559	1.02791	50.3213	0.378161	0.992584	35.6139	0.0623457	0	7.71109	0	99.9967	2.57773	97.1822	8.66678	2.08289e+07	24.4493	2.81293e+06	2.26067e+06	5.58688e+06	47.018	38.8253	6.89464	5.54103	13.6938	1.21654e+06	1.59494e+06	941611	1.31076e+06	20.5221	26.496	16.1367	22.6885	152984	4.62327e+06	33229.8	553653	109555	2.49568	78.6944	0.540339
Lower quartile	UN Intermediate region	Western Africa	4.07987e+08	0.188295	8.56353e+07	0.57506	8.85741e+06	0.0594795	47.4424	46.5199	1.0599	51.4767	0.40919	1.02061	36.6734	0.0673453	0	8.51628	2.7856e-06	99.9998	2.68386	97.2701	9.47631	2.29417e+07	26.6303	3.1026e+06	2.60441e+06	5.8764e+06	52.0616	43.8251	7.60465	6.38356	14.4034	1.33498e+06	1.7677e+06	1.0753e+06	1.52962e+06	22.4118	29.6535	18.0885	25.7136	159416	4.86238e+06	36539.6	661109	119565	2.66009	82.0155	0.613173
Median	UN Intermediate region	Western Africa	4.07987e+08	0.188295	8.61285e+07	0.578372	9.05854e+06	0.0608301	47.7061	46.7818	1.06704	51.7356	0.416563	1.02726	36.9224	0.0703238	0	8.73217	2.85606e-05	100	2.70703	97.293	9.68911	2.34277e+07	27.1801	3.22764e+06	2.73572e+06	5.95974e+06	54.1438	45.8562	7.91112	6.7054	14.6077	1.37727e+06	1.85017e+06	1.11956e+06	1.61671e+06	23.0995	31.0326	18.7708	27.0957	160794	4.9248e+06	37690.7	705099	122053	2.69938	82.7663	0.632141
Upper quartile	UN Intermediate region	Western Africa	4.07987e+08	0.188295	8.66534e+07	0.581897	9.27293e+06	0.0622698	47.9709	47.0426	1.07404	51.995	0.423581	1.03397	37.1684	0.0743767	0	8.97338	0.000179139	100	2.72985	97.3161	9.92519	2.38927e+07	27.717	3.34673e+06	2.85883e+06	6.04467e+06	56.1749	47.9384	8.20301	7.00714	14.8158	1.41778e+06	1.93003e+06	1.16196e+06	1.6992e+06	23.7673	32.4026	19.4488	28.4952	162326	4.98832e+06	38982.9	759924	124595	2.7377	83.3771	0.653517
Max	UN Intermediate region	Western Africa	4.07987e+08	0.188295	8.88255e+07	0.596483	1.04931e+07	0.0704636	49.1475	48.1972	1.1099	53.0664	0.45999	1.05895	38.3354	0.107205	0	10.5711	0.00328642	100	2.81785	97.4223	11.5004	2.59883e+07	29.8707	3.68227e+06	3.30067e+06	6.44487e+06	61.1747	52.982	9.02545	8.09014	15.7967	1.54981e+06	2.14148e+06	1.33866e+06	1.96202e+06	25.6482	35.6228	21.4352	31.5927	169732	5.34477e+06	47655.5	1.01347e+06	146588	2.89922	85.0329	0.784441
Mean	OECD region	Canada	3.75117e+07	0.23799	1.69416e+07	1.23736	1.91617e+06	0.13995	100	99.8797	0.0678177	0	0.0525148	51.3511	0	1.12483	17.0645	30.3392	99.6819	0.318073	100	0	99.8797	0	0	3014.92	0	3014.92	100	0	0.0803727	0	0.0803727	2082.71	932.206	0	0	69.0828	30.9172	0	0	2009.09	0	1005.83	0	0	66.6615	0	33.3385
Min	OECD region	Canada	3.75117e+07	0.23799	1.49814e+07	1.09419	1.51984e+06	0.111004	100	99.8615	0.0583006	0	0.0423254	35.3802	0	0.276908	6.58273	23.4231	99.5528	0.216758	100	0	99.8615	0	0	2502.67	0	2502.67	100	0	0.0667169	0	0.0667169	1721.4	777.166	0	0	66.521	29.1849	0	0	1639.94	0	785.515	0	0	61.6992	0	29.2173
Lower quartile	OECD region	Canada	3.75117e+07	0.23799	1.63967e+07	1.19756	1.84182e+06	0.13452	100	99.8762	0.0659802	0	0.0505239	48.8898	0	0.768939	14.5599	29.1788	99.6594	0.294485	100	0	99.8762	0	0	2908.37	0	2908.37	100	0	0.0775324	0	0.0775324	2009.68	897.003	0	0	68.8467	30.6655	0	0	1942.66	0	954.986	0	0	65.8169	0	32.4722
Median	OECD region	Canada	3.75117e+07	0.23799	1.68841e+07	1.23316	1.91121e+06	0.139588	100	99.8797	0.067764	0	0.052502	51.5159	0	1.05278	16.7807	30.404	99.6835	0.316491	100	0	99.8797	0	0	3008.21	0	3008.21	100	0	0.0801938	0	0.0801938	2077.69	929.619	0	0	69.0938	30.9062	0	0	2005.73	0	1001.16	0	0	66.6852	0	33.3148
Upper quartile	OECD region	Canada	3.75117e+07	0.23799	1.74226e+07	1.27248	1.98452e+06	0.144942	100	99.8832	0.069663	0	0.0544659	53.9897	0	1.40853	19.1973	31.5536	99.7055	0.340599	100	0	99.8832	0	0	3113.83	0	3113.83	100	0	0.0830094	0	0.0830094	2150.63	963.882	0	0	69.3345	31.1533	0	0	2071.65	0	1052.46	0	0	67.5278	0	34.1831
Max	OECD region	Canada	3.75117e+07	0.23799	1.97007e+07	1.43887	2.437e+06	0.17799	100	99.8987	0.0774796	0	0.0638592	64.3639	0	3.00668	31.4961	35.5273	99.7832	0.447248	100	0	99.8987	0	0	3826.93	0	3826.93	100	0	0.10202	0	0.10202	2606.54	1220.39	0	0	70.8151	33.479	0	0	2431.71	0	1409.35	0	0	70.7827	0	38.3008
Mean	OECD region	China	1.43115e+09	0.163004	3.5178e+08	0.673428	4.2807e+07	0.0819475	94.165	93.494	0.299563	5.81748	0.38894	45.2566	0.23933	1.08573	34.23	12.6824	4.59421	95.4058	99.474	0.526039	93.2366	1.38476e+07	3.93724	1.16639e+06	1.63046e+06	2.79685e+06	41.7046	58.2954	0.814997	1.13926	1.95426	573147	593240	729970	900489	20.4935	21.2112	26.0994	32.196	184409	2.3634e+06	166476	18838.2	63718.1	6.59484	84.5001	5.95273
Min	OECD region	China	1.43115e+09	0.163004	3.35473e+08	0.642211	3.94951e+07	0.0756073	93.8057	93.1113	0.286639	5.48405	0.365695	43.8132	0.215957	0.783082	32.5153	11.2943	4.03957	94.9494	99.4199	0.482355	92.8495	1.32394e+07	3.68451	1.10097e+06	1.52491e+06	2.63264e+06	40.1317	56.8687	0.769288	1.06551	1.83952	544966	555804	680656	844251	19.7144	20.3432	25.3614	31.4038	177113	2.20771e+06	152286	16045.4	58129.8	6.22391	83.6997	5.51532
Lower quartile	OECD region	China	1.43115e+09	0.163004	3.47861e+08	0.665927	4.21427e+07	0.0806758	94.0966	93.4215	0.297039	5.74631	0.383179	44.9947	0.234768	0.998377	33.8728	12.3956	4.49755	95.304	99.4649	0.516529	93.1623	1.37213e+07	3.88813	1.15172e+06	1.60878e+06	2.7649e+06	41.4223	58.0122	0.804747	1.12411	1.93193	566372	585249	720190	888475	20.3584	21.0547	25.96	32.0302	182957	2.33295e+06	163362	18269.5	62549.5	6.52307	84.3329	5.85404
Median	OECD region	China	1.43115e+09	0.163004	3.5164e+08	0.673162	4.27833e+07	0.081902	94.1666	93.4953	0.29962	5.81596	0.388741	45.2619	0.239296	1.07299	34.2372	12.6542	4.60019	95.3998	99.4743	0.525728	93.2376	1.38429e+07	3.93629	1.16543e+06	1.62931e+06	2.79575e+06	41.7065	58.2935	0.814326	1.13846	1.95349	572654	592691	729406	899917	20.4939	21.21	26.0995	32.1954	184338	2.36239e+06	166289	18772.9	63658.1	6.59367	84.4985	5.94739
Upper quartile	OECD region	China	1.43115e+09	0.163004	3.55615e+08	0.68077	4.34348e+07	0.0831493	94.2365	93.5692	0.302165	5.88567	0.394698	45.5174	0.24385	1.15783	34.5916	12.9486	4.69602	95.5024	99.4835	0.535109	93.3134	1.39696e+07	3.98557	1.17966e+06	1.65117e+06	2.82772e+06	41.9878	58.5777	0.82427	1.15374	1.97583	579339	600646	739204	912070	20.6304	21.3662	26.2303	32.359	185771	2.39199e+06	169336	19349.9	64810.5	6.66748	84.6643	6.04487
[truncated: 85 more rows]
[truncated: 14 more columns]

## Sheet: 03a_Outputs_legend
Output_ID	Output_short_name	Output_long_name	Unit
[truncated: 59 more rows]
